# Supplementary material for: Enhancing Genome-Scale Model by Integrative Exometabolome and Transcriptome: Unveiling Carbon Assimilation towards Sphingolipid Biosynthetic Capability of Cordyceps militaris
Source: J Fungi (Basel). 2022 Aug 22;8(8):887. doi: 10.3390/jof8080887 (PMC9409897; doi:10.3390/jof8080887)
Supplement: Supplementary file 1 [file jof-08-00887-s001.zip]

Archive with 8 entries (8 files):
- Supplementary Figure S1.pdf
- Supplementary File S1.xlsx
- Supplementary File S2.xlsx
- Supplementary File S3.xlsx
- Supplementary File S4.xlsx
- Supplementary File S5.xlsx
- Supplementary File S6.xlsx
- Supplementary File S7.xlsx
