# Supplementary material for: Enhancing Genome-Scale Model by Integrative Exometabolome and Transcriptome: Unveiling Carbon Assimilation towards Sphingolipid Biosynthetic Capability of Cordyceps militaris
Source: J Fungi (Basel). 2022 Aug 22;8(8):887. doi: 10.3390/jof8080887 (PMC9409897; doi:10.3390/jof8080887)
Supplement: Supplementary file 1 [file jof-08-00887-s001.zip › Supplementary File S1.xlsx]

## Sheet: Index
Supplementary Information
Enhancing Genome-Scale Model by Integrative Exometabolome and Transcriptome: Unveiling Carbon Assimilation towards Sphingolipid Biosynthetic Capability of Cordyceps militaris
Pattsarun Cheawchanlertfa 1,†, Suwalak Chitcharoen 1,2,†, Nachon Raethong 3, Qing Liu 4, Pramote Chumnanpuen 1,5, Panyawarin Soommat 1,6, Yuanda Song 1,4, Mattheos Koffas 7, Kobkul Laoteng 8,*, Wanwipa Vongsangnak 1,5,*
1 Department of Zoology, Faculty of Science, Kasetsart University, Bangkok 10900, Thailand 2 Program in Bioinformatics and Computational Biology, Graduate School, Chulalongkorn University, Bangkok 10330, Thailand 3 Institute of Nutrition, Mahidol University, Nakhon Pathom 73170, Thailand 4 Colin Ratledge Center for Microbial Lipids, School of Agriculture Engineering and Food Sciences, Shandong Un…
Supplementary File S1: The identified footprint metabolites derived from each pairwise comparison of the cultures using different carbon sources
This file includes Supplementary Tables S1 to S3
	Supplementary Table S1. Total identified metabolites in pairwise carbon source comparison between xylose versus glucose
	Supplementary Table S2. Total identified metabolites in pairwise carbon source comparison between sucrose versus glucose
	Supplementary Table S3. Total identified metabolites in pairwise carbon source comparison between xylose versus sucrose

## Sheet: Table S1
Supplementary Table S1. Total identified metabolites in pairwise carbon source comparison between xylose versus glucose
featureidx	ppm	Putative metabolites	fold	log2fold	tstat	pvalue	qvalue	updown	mzmed	mzmin	mzmax	rtmed	rtmin	rtmax	maxint	dataset1_mean	dataset1_sd	dataset2_mean	dataset2_sd	isotopes	adducts	peakgroup	metlin	name	METLIN_MSMS	usernotes
1	1	Adenosine, 2',3'-dideoxy-2'-(1-pyrrolidinyl)-	5.20966	2.38119	17.7199	7.49258e-05	0.00999914	UP	305.172	305.172	305.172	13.6973	13.669	13.717	31853.5	172113	54413.8	896652	45329			10		M305T14	y
2	0	(2S,3R)-2-aminoheptadecane-1,3-diol	15.8337	3.98492	15.4985	0.000121334	0.00999914	UP	288.29	288.29	288.29	11.7367	11.735	11.7378	537618	705139	754675	1.11672e+07	893021	[24][M]+		2		M288T12	y
3	0	1,3,5-Triazine-2,4-diamine, N,N,N',N'-tetramethyl-6-nitro-	673.077	9.39463	86.1697	0.000125418	0.00999914	UP	213.11	213.109	213.11	8.049	7.98733	8.12217	963811	50999	47115.8	3.44231e+07	689287	[9][M]+		6		M213T8	y
4	0	Guanine, 8-(p-nitrophenyl)-	2.73835	1.45331	13.5055	0.000175374	0.00999914	UP	273.073	273.073	273.073	6.04258	6.016	6.06917	17548.6	397019	61433.8	1.08718e+06	63719.7			33		M273T6_1	y
5	2	Phosphorothioic O,O,O-acid--2,3-dichloropropan-1-ol (1/3)	13.4773	3.75246	19.2079	0.000176415	0.00999914	UP	498.901	498.901	498.901	28.0475	28.0383	28.0567	7972.63	82786.1	80014.8	1.11767e+06	48021.9			55		M499T28	y
6	1	Monoethanolamine myristate	16.7922	4.06972	12.2121	0.000259983	0.00999914	UP	290.269	290.269	290.269	9.61567	9.60133	9.653	100989	113862	183736	1.91441e+06	177361	[25][M]+		19		M290T10	y
7	1	n-adenosylaziridine	21.5651	4.43063	18.4004	0.000276934	0.00999914	UP	293.136	293.136	293.136	11.934	11.9212	11.9382	5572.39	13533.7	23441.1	298060	12955.1			11		M293T12	y
8	1	Carbocyclic-3'-amino-adenosine	3.30174	1.72323	13.4472	0.00028566	0.00999914	UP	265.141	265.141	265.141	10.784	10.7832	10.859	107178	1.04988e+06	185636	3.46644e+06	249848			29		M265T11	y
9	-	Unknown	7.56774	2.91986	17.4185	0.000297971	0.00999914	UP	258.274	258.273	258.275	22.4746	22.465	22.4842	9778.31	58219.9	33067.1	440593	18768.8			41		M258T22	n
10	-	Unknown	17.6448	4.14117	15.413	0.000343271	0.00999914	UP	289.293	289.293	289.293	11.7367	11.735	11.7378	95670	116065	113010	2.05049e+06	185699	[24][M+1]+		2		M289T12	n
11	2	Sodium chromate	14.0909	3.8167	11.4578	0.000353666	0.00999914	UP	162.907	162.907	162.907	19.27	19.14	19.2745	3624.13	49405.8	72825.8	696174	65234.2			21		M163T19	y
12	1	Guanine, 8-(p-nitrophenyl)-	2.55592	1.35384	11.2835	0.000379372	0.00999914	UP	273.073	273.071	273.074	8.01817	7.92117	8.0925	6971.14	284305	45075	726663	50784.5			6		M273T8	y
13	-	Unknown	17.3842	4.11971	11.6578	0.000386238	0.00999914	UP	110.009	110.009	110.009	11.603	11.603	11.603	5360.38	23235.4	35957.8	406430	44140.4			2		M110T12	n
14	3	Oxaziridine-2-sulfonic acid	326.728	8.35195	44.0611	0.000504872	0.0100334	UP	125.986	125.986	125.986	15.5167	15.488	15.5453	15990.6	14418.5	7236.78	4.71094e+06	184479			27		M126T16	y
15	2	Benzylamine	3.20076	1.67842	10.8087	0.000509266	0.0100344	UP	108.081	108.08	108.081	29.544	29.5163	29.5717	30886.7	810640	180955	2.59467e+06	221326			7		M108T30	y
16	-	Unknown	14.8974	3.89699	10.3757	0.000517246	0.0100361	UP	706.604	706.603	706.604	31.4322	31.3998	31.4647	12935.2	106213	183966	1.58657e+06	165004	[64][M+1]+		35		M707T31	n
17	4	Hydroxyethyl pantothenamide monoethanolamide	1015.56	9.98807	42.938	0.000541956	0.0100411	UP	307.188	307.187	307.188	13.5633	13.471	13.5828	5283.8	0	0	438244	17678.1			10		M307T14_2	y
18	3	Benzenesulfonic acid, 4-methyl-, compd. with N,N-diethylethanamine (1:1)	3.18988	-1.6735	-20.8643	0.000558548	0.0100442	DOWN	274.146	274.146	274.146	19.4081	19.257	19.554	97565.1	3.07569e+06	162950	964203	64593.3			21		M274T19	y
19	-	Unknown	1.54388	-0.626558	-9.80055	0.000613788	0.0100533	DOWN	251.181	251.181	251.181	11.1518	11.025	11.285	323202	9.22579e+06	396810	5.97573e+06	415280	[15][M+1]+		1		M251T11	n
20	3	4-Nitroprocainamide	981.644	9.93906	40.3394	0.00061396	0.0100533	UP	266.151	266.151	266.151	28.0937	28.0383	28.149	4691.33	0	0	423606	18188.3			55		M266T28	y
21	8	(Prop-2-yn-1-yl)germane	3098.34	11.5973	39.9038	0.000627427	0.0100553	UP	116.976	116.976	116.976	0.525167	0.525	0.529	6261.77	0	0	1.33702e+06	58034.2			32		M117T1	y
22	5	Phosphoric triamide, N-(bis(dimethylamino)methylene)-N',N',N'',N''-tetramethyl-	1.56121	-0.642661	-9.59413	0.000660103	0.0100981	DOWN	250.178	250.178	250.178	11.2184	11.1518	11.285	2.68089e+06	7.21014e+07	3.32829e+06	4.61832e+07	3.28882e+06	[15][M]+		1		M250T11_2	y
23	4	TG(12:0/12:0/17:2(9Z,12Z))[iso3] (Triacylglycerol)	20.3805	4.34912	10.9102	0.00077233	0.0108566	UP	705.6	705.6	705.6	31.4322	31.3998	31.4647	25661.5	156048	270283	3.18621e+06	397945	[64][M]+		35		M706T31	y
24	0	[2-(2-{[tert-Butyl(dimethyl)silyl]oxy}ethyl)phenyl]boronic acid	26.1485	4.70866	18.0806	0.000780854	0.0109092	UP	281.174	281.173	281.175	13.7072	13.6973	13.717	3768.98	6688.54	6150.45	178657	15282.7			10		M281T14	y
25	5	Benzenesulfonic acid, 2-[[[3-[[8-[[(2-ethoxyethoxy)carbonyl]amino]-2-hydroxy-1-naphthalenyl]azo]-4-hydroxyphenyl]sulfonyl]amino]-	9.41605	-3.23512	-15.954	0.000856703	0.0113505	DOWN	631.113	631.113	631.113	28.6328	28.6263	28.6393	11537.9	1.09024e+06	96767.1	115785	42755.5	[57][M]+		14		M631T29	y
26	0	1-Propene, 1,1-dichloro-3,3,3-trifluoro-	132.069	7.04515	26.8826	0.000891263	0.0115368	UP	164.948	164.948	164.948	19.205	19.14	19.27	8850.84	13031.5	22571.2	1.75905e+06	110209			21		M165T19	y
27	0	2-Propenoic acid, 3-[3-(trifluoromethyl)phenyl]-, butyl ester, (2E)-	3.35596	1.74673	9.79617	0.00132809	0.0145416	UP	273.11	273.11	273.11	6.14725	6.10267	6.19183	17548.6	236539	52874.9	793818	83143.1			33		M273T6_2	y
28	1	5-(4-benzylpiperazino)-1H-1,2,4-triazol-3-ylamine	10.5828	3.40365	10.9379	0.00143943	0.0151649	UP	259.166	259.166	259.167	14.3687	14.347	14.3893	2297.42	11007.8	14890.5	118016	8087.57			38		M259T14	y
29	1	Silane, diphenyldi-2-propenyl-	105.52	6.72138	22.8151	0.00148839	0.0154243	UP	265.141	265.141	265.141	13.5633	13.471	13.5828	57082.5	15565.5	19714.7	1.65766e+06	123094			10		M265T14	y
30	-	Unknown	11.1874	3.4838	22.7801	0.00154431	0.0157105	UP	110.009	110.008	110.009	15.5167	15.488	15.5453	5207.34	120142	92044.2	1.34408e+06	13715.5			27		M110T16	n
31	0	1,4-dimethyl-3-(phenylsulfanyl)-7-(propan-2-yl)azulene	675.166	9.3991	23.5383	0.00180001	0.0168955	UP	307.152	307.151	307.152	13.693	13.669	13.717	5049.71	0	0	291352	21439			10		M307T14_1	y
32	0	2,2-Dichloroethane-1-peroxol	94.3375	6.55976	21.5415	0.0019354	0.0174517	UP	130.966	130.966	130.966	21.3757	21.289	21.4623	5720.34	10246.1	7948.88	966594	76483.3			48		M131T21	y
33	-	Unknown	13.7816	-3.78468	-16.7006	0.00211643	0.0181304	DOWN	632.114	632.114	632.114	28.6328	28.6263	28.6393	7066.37	652787	60944.6	47366.4	15109	[57][M+1]+		14		M632T29	n
34	-	Unknown	187.746	7.55264	20.6168	0.0022206	0.018491	UP	214.113	214.113	214.113	8.049	7.98733	8.12217	92127	21273	25158.9	3.99393e+06	332799	[9][M+1]+		6		M214T8	n
35	-	Unknown	29.0167	4.85881	14.9623	0.00232014	0.0188173	UP	156.948	156.948	156.948	15.5342	15.488	15.5453	10282.5	92753.6	82411.6	2.6914e+06	289313			27		M157T16	y
36	0	Pelargonic acid morpholide	1.39577	-0.481057	-8.34795	0.00237793	0.018999	DOWN	228.196	228.196	228.196	11.603	11.603	11.603	404162	1.07841e+07	539076	7.7263e+06	334533	[12][M]+		2		M228T12	y
37	2	Benzensulfonate	2093.5	11.0317	20.3017	0.00241746	0.0191203	UP	158.003	158.003	158.003	5.81183	5.78867	5.835	14282.3	0	0	903401	77074.4			42		M158T6	y
38	6	{1-[Tri(propan-2-yl)silyl]-1H-pyrrol-3-yl}boronic acid	1.62502	-0.700456	-8.18981	0.00245219	0.0192248	DOWN	268.188	268.188	268.188	11.1518	11.025	11.285	199269	6.79393e+06	467834	4.18083e+06	294181			1		M268T11_2	y
39	5	Elocalcitol	1.61861	-0.694753	-6.76787	0.00262984	0.019732	DOWN	443.334	443.334	443.334	21.8448	21.636	22.0742	36073.7	1.38871e+06	101881	857966	89831.9			43		M443T22	y
40	1	Methanol, (4,6-bis(bis(butoxymethyl)amino)-s-triazin-2-ylimino)di-	1.85361	-0.890338	-13.9294	0.00272061	0.0199747	DOWN	531.387	531.385	531.387	21.4449	21.289	21.6625	21546	953885	15026.8	514609	52514.1			48		M531T21	y
41	4	2-carboxybenzenesulfonate	103.682	6.69602	18.4939	0.00275049	0.0200523	UP	201.992	201.992	201.992	23.9472	23.702	23.9535	2632.92	3215.51	2439.24	333389	30826.2			51		M202T24	y
42	2	Benzensulfonate	148.189	7.21129	18.8567	0.00278702	0.0201457	UP	158.003	158.003	158.003	15.5342	15.488	15.5453	8256.92	14160.9	4402.39	2.09849e+06	191402			27		M158T16	y
43	0	Silane, naphthalenylphenyl-	11.3716	3.50737	9.61801	0.00284935	0.0203015	UP	235.094	235.094	235.094	5.13492	5.11283	5.157	6062.63	20276.6	16366.5	230578	34152.9			44		M235T5	y
44	1	Morpholine, 4-[[2-[(1,1-dimethylethyl)azo]-3-pyridinyl]azo]-	2.77921	1.47467	7.02165	0.00286737	0.0203457	UP	277.177	277.177	277.177	14.5237	14.52	14.529	57984.2	504881	132812	1.40317e+06	177370	[21][M]+		34		M277T15	y
45	2	5-{[2-(6-Amino-9H-purin-9-yl)ethyl]amino}pentan-1-ol	5.25838	2.39462	7.82932	0.00289884	0.0204221	UP	265.178	265.178	265.178	14.5237	14.52	14.529	10713.1	64053.4	31897	336817	51223			34		M265T15	y
46	0	Heptadecanoyl Ethanolamide	2.03109	1.02225	7.10576	0.0029381	0.0205158	UP	314.305	314.305	314.305	14.3687	14.347	14.3893	26921.9	341060	69497.2	692723	50178.2			38		M314T14	y
47	0	2,2-Dichloroethane-1-peroxol	64.2527	6.00569	17.9564	0.00306397	0.0208055	UP	130.966	130.966	130.966	19.27	19.14	19.2745	4792.57	15811.8	2793.31	1.01595e+06	96431.6			21		M131T19	y
48	1	Urea, 1,1'-ethylenebis(3-(2-chloroethyl)-1-nitroso-	3.16933	1.66418	8.65519	0.00326495	0.0212363	UP	329.053	329.053	329.053	10.784	10.7832	10.859	97263.2	812785	161843	2.57599e+06	313541			29		M329T11	y
49	0	C16 Sphinganine	1.4305	-0.516518	-7.64319	0.00332088	0.0213498	DOWN	274.274	274.274	274.274	11.603	11.603	11.603	1.21239e+06	2.43749e+07	1.42147e+06	1.70394e+07	861818	[20][M]+		2		M274T12	y
50	0	1,4-dimethyl-3-(phenylsulfanyl)-7-(propan-2-yl)azulene	3.59167	1.84465	11.5283	0.00342339	0.0215512	UP	307.151	307.151	307.152	11.1518	11.025	11.285	11361.3	180181	66500.3	647151	22361.5			1		M307T11	y
51	-	Unknown	22.4683	4.48982	11.6612	0.0034831	0.0216647	UP	333.334	333.334	333.334	21.2306	21.1722	21.289	2337.13	13098.1	13089.1	297523	40167.1			52		M333T21	n
52	0	(R)-(+)-1,1,1-Trifluoro-2-octanol	4.61091	-2.20505	-6.17334	0.00379502	0.0222159	DOWN	185.115	185.115	185.115	5.42583	5.30733	5.518	694133	3.16976e+07	5.3017e+06	6.87446e+06	4.51637e+06	[8][M]+		9		M185T5	y
53	9	2,6,13,17-Tetraazatricosan-23-ol	168.293	7.39483	15.8041	0.00390139	0.0223893	UP	345.356	345.355	345.356	21.0986	21.025	21.1722	1341.82	1090.47	1097.84	207726	22619.6			52		M345T21	y
54	-	Unknown	3838.46	11.9063	15.7655	0.00399921	0.0225429	UP	251.181	251.181	251.181	18.7477	18.745	18.7505	6467.67	0	0	1.6564e+06	181978	[16][M+1]+		30		M251T19	n
55	0	N-Stearylbenzylamine	1.51462	0.598954	6.25412	0.0041475	0.0227656	UP	360.363	360.362	360.363	18.578	18.244	18.7505	105045	3.55871e+06	308123	5.39009e+06	402869	[36][M]+		30		M360T19	y
56	1	1-Hydroxy-3-methyl-3,4-dihydro-2(1H)-quinoxalinone 4-oxide compound with N,N-diethylamine (1:1)	151.115	7.2395	14.7439	0.00424008	0.0228988	UP	266.15	266.149	266.15	13.6973	13.471	13.717	15469.5	9249.02	16019.8	1.44113e+06	167448			10		M266T14	y
57	0	(2S)-2-Azido-4-(methylsulfanyl)butanoic acid--cyclohexanamine (1/1)	1.94719	-0.961393	-7.37184	0.00430388	0.0229881	DOWN	275.154	275.153	275.154	19.4081	19.289	19.4493	54355.1	1.56658e+06	155818	804533	88194.5			21		M275T19_1	y
58	0	1,1-Propanediol, 2,2,3,3,3-pentafluoro-	9.5456	3.25484	8.28533	0.00444708	0.0231816	UP	167.013	167.012	167.013	5.78867	5.669	5.7915	3296.47	27037.6	43934.8	259464	20750.8			28		M167T6	y
59	-	Unknown	6.1651	2.62412	6.10624	0.00448503	0.0232313	UP	609.598	609.597	609.598	31.3034	31.207	31.3998	1360.16	26342.5	23647.6	163291	30818.5			35		M610T31	n
60	0	Ethyl [4-fluoro-3-(4,4,5,5-tetramethyl-1,3,2-dioxaborolan-2-yl)phenyl]acetate	21.5749	4.43128	8.56075	0.0045116	0.0232658	UP	309.167	309.167	309.167	11.603	11.603	11.603	11313.6	16157.9	27986.3	354813	62542.1			2		M309T12_2	y
61	2	2-Amino-8-bromoadenosine	5.08274	2.34561	10.1727	0.00453337	0.0232938	UP	361.025	361.024	361.03	6.45833	6.4015	6.5475	9859.86	108838	71603	553193	24437			24		M361T6	y
62	0	3-Decyn-2-one, 1,1,1-trifluoro-	3.54827	1.82711	5.84344	0.00453714	0.0232986	UP	207.099	207.099	207.099	5.13633	5.11567	5.157	12547.4	212166	105165	752820	120921			44		M207T5	y
63	1	PUNCTAPORIN B	6.11242	2.61174	8.33017	0.00454492	0.0233085	UP	253.18	253.179	253.18	13.6973	13.669	13.717	17381.9	69095.4	30885.8	422340	66638.9			10		M253T14	y
64	-	Unknown	2.35354	-1.23483	-5.81893	0.00458272	0.0233565	DOWN	227.164	227.164	227.164	10.1837	10.1823	10.215	36514.4	617408	69607.2	262331	79533	[11][M+1]+		13		M227T10	n
65	1	1-(5-bromoselenophen-2-yl)ethanone	464.046	8.85812	14.5229	0.00470779	0.023511	UP	252.876	252.876	252.877	23.1211	23.058	23.1842	1913.21	0	0	200248	23882.3			4		M253T23	y
66	0	beta-D-Ribofuranuronamide, 1-(6-amino-9H-purin-9-yl)-1-deoxy-N-(2-ethoxy-2-oxoethyl)-, monohydrate	3.58636	1.84252	8.35189	0.00472587	0.0235328	UP	367.136	367.136	367.136	10.1837	10.1823	10.215	23653.2	207838	45943.7	745383	101571			13		M367T10	y
67	1	Methyl jasmonate	3.95553	1.98387	12.3392	0.00475288	0.0235652	UP	225.148	225.148	225.148	10.784	10.7832	10.859	21157.1	182919	15340.1	723539	74320.1			29		M225T11	y
68	2	Benzensulfonate	493.309	8.94635	14.3003	0.00484011	0.0236678	UP	158.003	158.003	158.003	0.525167	0.525	0.529	20489.2	8298.67	9628.59	4.16476e+06	503337			32		M158T1	y
69	1	3E,5E-tridecadienoic acid	2.5967	1.37668	13.7173	0.00486663	0.0236985	UP	211.169	211.169	211.169	12.942	12.8927	12.945	10714.1	140441	28171.5	364684	2842.29			39		M211T13	y
70	0	Bis(benzyloxy)(methyl)phenylsilane	8.39874	3.07017	5.93811	0.00494843	0.0237914	UP	335.146	335.146	335.146	9.36783	9.34983	9.388	4730.07	29286	50724.9	248382	38872.2			16		M335T9	y
71	-	Unknown	172.563	7.43098	13.8928	0.00511988	0.02411	UP	317.324	317.324	317.325	19.205	19.14	19.27	3296.72	5121.93	2502.66	883856	109525	[27][M+1]+		21		M317T19	n
72	5	PA(17:0/14:1(9Z)) (Phosphatidic acid)	2.34829	-1.23161	-8.43536	0.00518195	0.0242221	DOWN	633.455	633.455	633.455	23.3457	23.309	23.3825	4328.3	228513	24808	97310.3	10504.1			4		M633T23	y
73	-	Unknown	44.6385	5.48022	11.8062	0.00540006	0.0246998	UP	110.009	110.008	110.009	23.9472	23.702	23.9535	3349.21	8780.87	10750	391965	55178.5			51		M110T24	n
74	-	Unknown	854.039	9.73816	12.8723	0.00598103	0.0258777	UP	275.277	275.277	275.277	29.2103	29.1437	29.277	3130.41	0	0	368541	49589.5			22		M275T29	n
75	-	Unknown	2.79051	1.48053	6.07438	0.00601298	0.0259387	UP	138.063	138.063	138.063	4.32508	4.292	4.463	16925.7	876172	243543	2.44497e+06	375218	[1][M+2]+		25		M138T4	n
76	-	Unknown	190.957	7.5771	12.5837	0.00611252	0.0261268	UP	319.303	319.303	319.303	25.7036	25.6897	25.7175	2917.59	1468.12	2542.85	335282	45876.5	[29][M+1]+		40		M319T26	n
77	0	1,3-bis(2-ethylhexoxy)propan-2-amine	1565.66	10.6126	12.7262	0.00611539	0.0261321	UP	316.321	316.321	316.321	19.2722	19.27	19.2745	15060.2	2666.58	4618.66	4.62537e+06	629138	[27][M]+		21		M316T19	y
78	-	Unknown	5.2112	2.38161	5.89292	0.00615797	0.0262115	UP	505.442	505.441	505.442	28.835	28.7987	28.8713	54680	249896	173464	1.30226e+06	256093			14		M505T29	n
79	0	Methyl 2-fluoro-4-(4,4,5,5-tetramethyl-1,3,2-dioxaborolan-2-yl)benzoate	94.5931	6.56366	11.9696	0.0062965	0.0264654	UP	281.136	281.136	281.136	10.1837	10.1823	10.215	11172.4	9553.88	14675.2	917337	130537			13		M281T10	y
80	4	Diethyl (2-methoxyethyl)propylpropanedioate	486.769	8.92709	12.1137	0.0067458	0.0272468	UP	261.169	261.169	261.169	18.7477	18.745	18.7505	1151.68	0	0	210054	30034.1			30		M261T19	y
81	1	Oxypinnatanine	66.1113	6.04682	10.9957	0.00682017	0.0273703	UP	261.108	261.108	261.108	11.934	11.9212	11.9382	11224.1	4705.11	8149.49	330080	50601.2			11		M261T12	y
82	2	N-Isobutyl decanamide	2.27668	1.18693	5.46251	0.00706119	0.0277598	UP	228.233	228.232	228.233	19.27	19.14	19.3113	10725.5	256292	83874.7	583496	61065.7			21		M228T19	y
83	-	Unknown	21.5935	4.43253	7.76763	0.00719958	0.0279764	UP	291.272	291.272	291.272	9.62717	9.60133	9.653	19332.8	18739.3	31748.2	407754	80725	[25][M+1]+		19		M291T10	n
84	0	Ammonium pentadecanoate	482.457	8.91426	11.4283	0.00756276	0.0285217	UP	260.258	260.258	260.259	19.27	19.14	19.2745	3926.6	1649.1	1486.58	865020	130842			21		M260T19_2	y
85	0	Propan-1-ol--triphenylsilanol (1/1)	3.1416	1.6515	5.35513	0.00763977	0.0286332	UP	337.162	337.162	337.162	13.5828	13.5633	13.669	7582.46	142147	57607	446569	79850.4			10		M337T14_1	y
86	3	Oxaziridine-2-sulfonic acid	390.698	8.60991	11.2772	0.00774946	0.0287896	UP	125.986	125.986	125.986	13.6832	13.669	13.6973	16649.6	4818.53	5779.25	1.88259e+06	288348			10		M126T14	y
87	9	Dilauryl tartrate	5.28413	-2.40167	-8.16538	0.00791363	0.0290188	DOWN	487.395	487.394	487.395	29.7028	29.6908	29.7148	8377.52	205937	11202	38828.9	33630.6			26		M487T30	y
88	-	Unknown	2.20542	1.14105	4.91866	0.00793887	0.0290534	UP	129.986	129.986	129.986	28.835	28.7987	28.8713	3993.26	242186	73037.3	534120	72344.4			14		M130T29	y
89	-	Unknown	10.6378	3.41112	10.1481	0.00821826	0.0294285	UP	337.852	337.851	337.852	23.6456	23.5892	23.702	903.839	7024.52	1728.5	74725.2	11425			49		M338T24	n
90	3	Oxaziridine-2-sulfonic acid	401.475	8.64917	10.7487	0.00851211	0.029806	UP	125.986	125.986	125.986	23.9472	23.702	23.9535	10104.1	2949.32	4681.98	1.24183e+06	199579			51		M126T24	y
91	-	Unknown	382.304	8.57858	10.6989	0.00859643	0.0299112	UP	122.964	122.964	122.964	21.636	21.4623	21.8365	3310.6	895.287	1550.68	452255	73054.1			43		M123T22	n
92	1	2-(Trifluoroacetyl)cyclooctan-1-one	3.78817	1.9215	9.05545	0.00870867	0.0300493	UP	223.094	223.094	223.094	5.78867	5.669	5.7915	21218.6	299944	155962	1.13624e+06	35536.1			28		M223T6	y
93	1	(2-anilino-2-oxoethyl) N,N-dimethylcarbamodithioate	3.66559	1.87404	9.9352	0.00882761	0.0301931	UP	255.062	255.062	255.062	4.9335	4.93267	4.93433	8530.61	214985	98987.1	788046	13506.7			44		M255T5	y
94	0	4-Octyloxyphenylboronic acid	558.586	9.12564	10.5283	0.00890128	0.0302809	UP	251.181	251.181	251.181	31.7267	31.638	31.8155	2288.88	0	0	241045	39655.1			15		M251T32	y
95	0	Succinic acid, tert-butyl ester, sodium salt	11.9018	3.57311	7.77413	0.00892922	0.0303139	UP	197.078	197.078	197.079	6.61275	6.5475	6.678	5568.44	21045.8	16096.1	250484	48517.8			24		M197T7	y
96	0	(2S,3R)-2-aminoheptadecane-1,3-diol	17546.7	14.0989	10.4759	0.0089894	0.0303847	UP	288.29	288.29	288.29	23.1732	23.1623	23.1842	71062.1	0	0	7.57186e+06	1.25191e+06			4		M288T23	y
97	-	Unknown	3.13956	1.65056	4.7647	0.00922586	0.0306568	UP	122.964	122.964	122.964	0.525	0.446	0.527	43117.4	2.412e+06	1.24012e+06	7.57262e+06	1.40762e+06			32		M123T1	n
98	0	[9-(4-Fluorophenyl)-9H-fluoren-9-yl]acetaldehyde	5.75028	2.52363	8.34086	0.00923531	0.0306675	UP	303.118	303.118	303.118	10.1993	10.1837	10.215	1410.44	19801.7	19021.9	114692	5142.74			13		M303T10	y
99	-	Unknown	11.19	3.48413	7.22836	0.00934213	0.0307872	UP	111.984	111.984	111.984	21.7362	21.636	21.8365	938.959	7307.87	6329.02	83384.4	17095.4			43		M112T22	n
100	0	Echiguanine B	396.796	8.63225	10.2507	0.00937088	0.0308191	UP	251.125	251.125	251.125	11.603	11.603	11.603	81542.4	5822.24	5527.82	2.36732e+06	398980			2		M251T12	y
101	7	3,4-Dihydro-3-thioxo-1,2,4-triazin-5(2H)-one	1305.94	10.3509	10.1748	0.00952158	0.0309844	UP	130.008	130.008	130.008	5.73025	5.669	5.7915	7592.37	0	0	563550	95932.6			28		M130T6	y
102	0	Orotidine	4.68332	2.22753	8.2137	0.00957489	0.031042	UP	289.068	289.068	289.068	5.663	5.657	5.669	117771	852883	172530	3.99432e+06	639584			28		M289T6	y
103	-	Unknown	7.82611	-2.96829	-8.09333	0.009687	0.0311617	DOWN	551.632	551.632	551.632	23.3979	23.309	23.4868	1656.55	135728	24416.4	17343	6761.97	[55][M+1]+		4		M552T23	n
104	2	Phosphorothioic O,O,O-acid--2,3-dichloropropan-1-ol (1/3)	1074.77	10.0698	9.81941	0.0102126	0.0316994	UP	498.901	498.901	498.901	31.7967	31.7778	31.8155	5349.57	0	0	463791	81808.3			15		M499T32	y
105	1	Mevinphos	23.0237	4.52505	9.17158	0.0102879	0.0317734	UP	229.084	229.084	229.084	8.08558	8.049	8.12217	11827.4	26129.2	15302.7	601592	107593			6		M229T8	y
106	1	Ammonium pentadecanoate	192.414	7.58807	9.70936	0.010427	0.0319081	UP	260.258	260.258	260.258	11.9297	11.9212	11.9382	3476.76	2075.87	1040.98	399426	70875.6			11		M260T12	y
107	1	4-TERT-BUTYL-2-TRIFLUOROMETHYLCYCLOHEXANONE	4.0798	2.0285	7.03071	0.0104653	0.0319446	UP	223.131	223.131	223.131	9.71825	9.653	9.7835	24242.6	183977	131491	750588	46848.4			19		M223T10	y
108	0	N,N-Dimethyldodecylamine-N-oxide	3.36592	1.751	8.23258	0.0105451	0.0320205	UP	230.248	230.248	230.248	11.603	11.603	11.603	302322	1.7708e+06	200319	5.96037e+06	858379			2		M230T12	y
109	2	Benzensulfonate	29.2877	4.87222	8.74999	0.0105499	0.0320249	UP	158.003	158.003	158.003	21.7362	21.636	21.8365	1384.65	3017.82	3123.95	92597.7	17454.9			43		M158T22	y
110	2	1-Hydroxy-3-methyl-3,4-dihydro-2(1H)-quinoxalinone 4-oxide compound with N,N-diethylamine (1:1)	405.84	8.66477	9.64444	0.0105806	0.0320539	UP	266.15	266.15	266.151	31.7267	31.638	31.8155	1460.08	0	0	175131	31451.8			15		M266T32	y
111	10	2,6,13,17-Tetraazatricosan-23-ol	6.95631	2.79832	4.888	0.0106251	0.0320956	UP	345.356	345.356	345.356	31.3998	31.289	31.4647	5068.8	89787.2	155516	626589	109527			35		M345T31	y
112	0	5-[4-(trifluoromethyl)phenyl]cyclohexane-1,3-dione	1.74482	0.803078	4.53737	0.0107928	0.0322507	UP	257.078	257.078	257.079	6.9945	6.942	6.99733	19828.4	327001	62171.4	570558	69128			23		M257T7	y
113	0	Hafnium tetrahydride	29.2683	4.87127	7.66365	0.0108442	0.0322975	UP	184.985	184.985	184.985	29.7892	29.6908	29.8875	19685.3	62021.9	107425	1.8237e+06	383388			26		M185T30_2	y
114	4	1-{3-[(Diethoxymethyl)silyl]propyl}pyrrolidine-2,5-dione	2.14492	-1.10093	-7.79479	0.0110901	0.0325694	DOWN	274.146	274.144	274.146	24.1518	24.051	24.1938	8424.31	1.07045e+06	31831.5	499060	122910			54		M274T24	y
115	6	3,4-Dihydro-3-thioxo-1,2,4-triazin-5(2H)-one	1533.49	10.5826	9.2523	0.0114808	0.0329861	UP	130.008	130.008	130.008	11.7358	11.735	11.7367	8054.14	0	0	661741	123879			2		M130T12	y
116	-	Unknown	204.68	7.67723	9.19453	0.011623	0.0331334	UP	507.86	507.86	507.86	31.7267	31.638	31.8155	936.777	0	0	88325.1	16638.5			15		M508T32	n
117	0	Orotidine	4.33235	2.11515	7.01099	0.0116551	0.0331664	UP	289.068	289.068	289.069	5.4285	5.30733	5.469	117771	944283	239740	4.09096e+06	739490			9		M289T5	y
118	-	Unknown	27.2701	-4.76925	-7.79536	0.0117163	0.0332287	DOWN	140.545	140.545	140.545	6.90958	6.84817	6.971	13430.7	321210	66910.6	11635	15945.6			23		M141T7	n
119	2	N,N-Dimethyldodecylamine-N-oxide	19.6701	4.29794	7.76396	0.0117677	0.0332809	UP	230.247	230.247	230.248	19.3487	19.2745	19.4228	2145.04	10817.6	10662.6	215612	44425.7			21		M230T19	y
120	0	(E)-1-(4-Nitrophenyl)-2-{[2-(4-nitrophenyl)hydrazinylidene]methyl}diazene	2.22379	1.15302	4.97949	0.0122612	0.0340397	UP	315.083	315.083	315.084	6.43	6.4015	6.5475	20493.5	318740	70760.6	708809	115768			24		M315T6	y
121	-	Unknown	9.31274	3.21921	4.73296	0.0124285	0.0342907	UP	619.577	619.577	619.578	31.7267	31.638	31.8155	1767.76	19176	33213.8	181260	49144.4			15		M620T32	n
122	0	Dibutylamine, compd. with hexafluorophosphate	157.089	7.29544	8.84365	0.0124326	0.0342969	UP	275.123	275.123	275.123	13.5633	13.471	13.5828	7332.53	2109.66	2638.1	354002	68868.5			10		M275T14	y
123	-	Unknown	5.86744	2.55273	8.26034	0.0130852	0.0352683	UP	700.645	700.645	700.646	30.612	30.5185	30.6325	3136.27	68728.3	8685.53	403259	69605.5			36		M701T31	n
124	0	Benzo[b]thiophene, 2-[2-(4-methylphenyl)ethenyl]-	4.6516	2.21773	6.63441	0.01348	0.0358347	UP	251.089	251.089	251.089	4.9335	4.93267	4.93433	6062.13	200450	57953.5	932412	182094			44		M251T5	y
125	1	1-Heptadecanamine, N,N-dimethyl-, acetate	7.76966	2.95785	4.30132	0.0136871	0.0361256	UP	344.353	344.352	344.353	31.7267	31.638	31.8155	20249.5	299668	519041	2.33056e+06	631972			15		M344T32	y
126	10	Decanoic acid, 1,2-ethanediylbis(oxy-2,1-ethanediyl) ester	1.73352	-0.793704	-4.24601	0.0137063	0.0361523	DOWN	459.364	459.363	459.365	31.3605	31.289	31.3887	3305.73	450725	58569	260006	51209.1			35		M459T31	y
127	5	Rozenite (Fe(SO4).4H2O)	12.2717	3.61726	5.45195	0.0138001	0.0362827	UP	224.935	224.935	224.935	15.5167	15.488	15.5453	3084.8	54530.1	83519.7	669177	176507			27		M225T16	y
128	0	Nonadecan-10-amine	26.051	4.70327	6.84633	0.013985	0.036537	UP	284.331	284.331	284.331	31.7267	31.638	31.8155	4448.75	19217.5	33285.6	508129	119127			15		M284T32	y
129	0	Silane, [(1,3-diphenyl-2-propynyl)oxy]trimethyl-	40.0188	5.3226	7.43627	0.0144285	0.037134	UP	281.136	281.136	281.136	12.2397	12.198	12.2897	14109.5	21899.2	37930.5	887892	198108			31		M281T12	y
130	4	Dichloro(difluoro)(pentafluoroethyl)-lambda~5~-phosphane	2.26636	1.18038	4.09718	0.014911	0.0377637	UP	258.909	258.908	258.909	21.7362	21.636	21.8365	698.537	28904	10787.5	65507	11093.3			43		M259T22	y
131	1	5,9-dinitrotridecane-2,12-dione	6.65743	2.73497	7.94366	0.0149454	0.0378078	UP	303.155	303.155	303.155	13.6832	13.669	13.6973	10155.6	47620.6	4575.84	317031	58564.2			10		M303T14	y
132	4	2-Chloro-1-methylpyridinium iodide	142.327	7.15306	8.03659	0.0150903	0.0379926	UP	255.939	255.939	255.939	23.7507	23.702	23.7993	657.475	370.064	343.482	73142.7	15680.2			49		M256T24	y
133	-	Unknown	2.55376	1.35262	5.94184	0.015314	0.0382744	UP	592.557	592.557	592.558	30.6223	30.612	30.6325	1978.52	70223.1	29889.5	179333	10872.6			36		M593T31	n
134	0	4-(Diphenylmethylidene)-3-(trimethylsilyl)oxetan-2-one	62.1721	5.95819	7.82595	0.0155558	0.0385745	UP	309.131	309.131	309.131	10.183	10.1823	10.1837	13863.9	14129.8	12582.1	887423	192868			13		M309T10	y
135	1	9H-Pyrido(3,4-b)indole, 1-((2-methylphenyl)methyl)-	2.16207	-1.11242	-6.73904	0.015631	0.0386669	DOWN	273.139	273.139	273.139	30.6894	30.6345	30.7443	23426.9	4.35484e+06	583728	2.0142e+06	145493			36		M273T31	y
136	0	Benzoic acid, 4-amino-2-(benzyloxy)-, 3-piperidinopropyl ester, hydrogen phosphate	209.079	7.70791	7.81312	0.0159525	0.0390566	UP	467.194	467.194	467.194	14.5263	14.5237	14.529	80040.7	7276.27	6768.19	1.52132e+06	335572			34		M467T15	y
137	0	C16 Sphinganine	1146.57	10.1631	7.79614	0.0160548	0.039179	UP	274.274	274.274	274.274	25.7036	25.6897	25.7175	16164.7	1321.12	2288.25	1.8446e+06	409512			40		M274T26	y
138	1	4-nitro-5-piperazinothiophene-2-sulfonamide	4.7448	2.24635	6.57749	0.0162172	0.0393717	UP	293.037	293.037	293.037	6.43	6.4015	6.5475	16403.6	170923	41775	810998	163292			24		M293T6_1	y
139	-	Unknown	2.80795	1.48952	7.12463	0.0166351	0.0398585	UP	256.153	256.153	256.153	6.96967	6.942	6.99733	27173.5	185227	13066.4	520109	80356.8	[17][M+1]+		23		M256T7	n
140	0	Iodomethylcyclooctane	9.92434	3.31097	6.72039	0.0169594	0.0402274	UP	253.045	253.045	253.045	4.32633	4.32383	4.463	17735.4	242300	117555	2.40467e+06	544769			25		M253T4_1	y
141	1	tert-Butyl 4-pentylpiperidine-1-carboxylate	2.41844	1.27408	4.71562	0.0176216	0.0409585	UP	256.227	256.227	256.227	14.3893	14.347	14.52	8742.68	185298	85390.4	448134	45037.5			38		M256T14	y
142	2	2-(4-Chlorophenyl)-6-isothiocyanato-1,3-benzothiazole	3.61799	-1.85519	-6.7122	0.0178531	0.0412072	DOWN	302.981	302.98	302.981	30.6894	30.6345	30.7443	13547	1.48857e+06	272990	411435	52267.5			36		M303T31_1	y
143	-	Unknown	1.56908	-0.649922	-3.98437	0.0178907	0.0412471	DOWN	668.619	668.619	668.62	31.3605	31.207	31.3998	25470.7	1.93026e+06	190307	1.23018e+06	237489			35		M669T31	n
144	0	9-(2-Chloro-6-fluorobenzyl)-6-methylaminopurine	20.8969	-4.38521	-7.19951	0.0179669	0.0413281	DOWN	292.076	292.076	292.076	6.48875	6.43	6.5475	174454	5.5718e+06	1.27127e+06	266633	113281			24		M292T6	y
145	3	Methanol, (4,6-bis(bis(butoxymethyl)amino)-s-triazin-2-ylimino)di-	2.56131	-1.35688	-5.16154	0.0182742	0.0416507	DOWN	531.385	531.383	531.387	31.3746	31.3605	31.3887	8832.46	1.26249e+06	237798	492907	100717			35		M531T31_1	y
146	1	(4-Chlorophenylethynyl)trimethylsilane	2.53199	1.34027	7.01948	0.0183069	0.0416846	UP	209.055	209.055	209.055	9.62717	9.60133	9.653	21762.7	247576	10949.7	626859	92945.1			19		M209T10	y
147	0	2,2,4,4-Tetramethyl-1,5-diphenyl-6-oxa-3-thiabicyclo[3.1.0]hexane (non-preferred name)	59.5606	5.89629	7.21117	0.018632	0.0420189	UP	311.146	311.146	311.147	14.3687	14.347	14.3893	6412.96	5891.78	2034	350918	82846.9			38		M311T14	y
148	0	Heptadecanoyl Ethanolamide	77.7645	6.28104	7.15709	0.0186934	0.0420813	UP	314.305	314.305	314.305	20.2354	20.231	20.2398	2945.84	3942	3952.89	317734	75836.2			3		M314T20	y
149	1	Heptadecanoyl Ethanolamide	16.9679	4.08473	5.44684	0.0189726	0.0423623	UP	314.305	314.305	314.305	31.7267	31.638	31.8155	9363.93	64983.2	112554	1.10751e+06	311822			15		M314T32	y
150	1	2,2-Diphenyl-1-(trimethylsilyl)cyclopropane-1-carboxylic acid	4.9517	2.30792	6.14389	0.0190193	0.0424089	UP	311.146	311.146	311.146	9.69958	9.61567	9.7835	3535.32	39850.5	10798.1	197327	43061.8			19		M311T10	y
151	4	3,3-Difluoro-17-methyl-5alpha-androstan-17beta-ol	2.40905	1.26847	4.44019	0.0195349	0.0429145	UP	327.251	327.251	327.251	18.6615	18.578	18.745	9294.86	256068	68185.7	616882	123129			30		M327T19	y
152	0	1-Decene, 4-(methylseleno)-	2.55056	1.35082	6.54271	0.0196897	0.0430634	UP	235.096	235.096	235.096	6.9945	6.942	6.99733	17642.5	296504	19893.1	756252	120072			23		M235T7	y
153	-	Unknown	20.3439	4.34653	6.945	0.0198322	0.0431993	UP	280.162	280.162	280.162	19.27	19.14	19.2745	7410.24	35866.1	8874.49	729657	172800	[23][M+1]+		21		M280T19	n
154	0	2,2-Dichloroethane-1-peroxol	117.004	6.87041	6.84498	0.0206141	0.043926	UP	130.966	130.966	130.966	23.6456	23.5892	23.702	4289.91	3508.54	2606.97	410512	102955			49		M131T24	y
155	2	2-lauroleic acid	12.7673	3.67439	5.76242	0.0206968	0.044001	UP	199.169	199.169	199.169	11.9361	11.934	11.9382	5461.97	10993	10446.5	142188	38025.3			11		M199T12	y
156	2	COUMARINIC ACID METHYL ETHER	5.78667	2.53273	5.97406	0.0209834	0.0442583	UP	179.07	179.07	179.07	6.65425	6.6305	6.678	6377.45	60004.8	18891.4	347228	81103.2			47		M179T7	y
157	0	3-Piperidinecarboxamdie, N-butyl-5-phenyl-	2.22132	1.15142	6.48097	0.0212306	0.044477	UP	255.149	255.149	255.149	6.9945	6.942	6.99733	151185	1.34237e+06	55004.4	2.98185e+06	434685	[17][M]+		23		M255T7	y
158	0	Pelargonic acid morpholide	13.8546	3.7923	6.14553	0.0214216	0.044644	UP	228.196	228.196	228.196	25.7036	25.6897	25.7175	6838.28	43391.2	29558.3	601169	154400			40		M228T26	y
159	4	O-Desmethylgalantamine	2.34958	-1.2324	-5.9734	0.0216534	0.0448443	DOWN	274.145	274.144	274.145	30.6345	30.6325	30.7443	11885.5	1.60379e+06	261018	682584	56734			36		M274T31	y
160	3	1,1,1,2-tetrachloro-2-fluoroethane	9.41093	3.23434	4.42296	0.0217613	0.0449367	UP	184.888	184.888	184.889	19.27	19.14	19.2745	1682.73	31975.7	47976.8	300921	93758			21		M185T19	y
161	2	Aleprylic acid	2.18994	1.13089	3.82991	0.0218703	0.0450295	UP	197.153	197.153	197.153	11.2184	11.1518	11.285	7452.58	129713	41235.6	284062	56322			1		M197T11	y
162	-	Unknown	120.476	6.91261	6.61909	0.0220131	0.0451502	UP	122.964	122.964	122.964	15.1661	15.14	15.1922	6700.82	11283.2	8067.49	1.35936e+06	352665			27		M123T15	n
163	5	2,2-Difluorohexane	6.05943	2.59918	4.63555	0.022056	0.0451863	UP	123.097	123.097	123.098	31.638	31.5762	31.8155	2402.38	50743.3	87889.9	309218	40033.4			15		M123T32	y
164	0	1,1,1-trifluoro-6-methylhept-5-ene-2,4-dione	7.51767	2.91029	6.27524	0.0225599	0.0456042	UP	195.063	195.063	195.063	3.6365	3.63417	3.669	11098.3	254112	58626.2	1.91033e+06	453365			12		M195T4	y
165	7	(Prop-2-yn-1-yl)germane	1221.86	10.2549	6.49178	0.0229161	0.0458929	UP	116.976	116.976	116.976	5.72425	5.657	5.7915	4063.9	0	0	527267	140678			28		M117T6	y
166	1	Dodecanoic acid, ammonium salt	18.4265	4.20371	6.11231	0.0230617	0.0460093	UP	218.211	218.211	218.211	25.7036	25.6897	25.7175	2572.87	17008.2	12638.2	313402	83033.1			40		M218T26	y
167	-	Unknown	4.93631	2.30343	4.03365	0.0230988	0.0460389	UP	141.958	141.958	141.958	5.79008	5.78867	5.7915	21058.5	399378	348285	1.97145e+06	578263			28		M142T6	y
168	2	1-[7-(3-Methylundecyl)-9H-fluoren-2-yl]nonan-1-one	2.01803	-1.01295	-3.96238	0.0231187	0.0460547	DOWN	475.394	475.392	475.395	31.3887	31.207	31.5762	5043.1	713339	133125	353483	83794.9			35		M475T31	y
169	3	2,2,3,4,4-Pentafluorobut-3-enenitrile	1984.7	10.9547	6.42243	0.0233963	0.0462737	UP	158.003	158.003	158.003	13.5269	13.471	13.5828	9939.54	0	0	856454	230975			10		M158T14	y
170	-	Unknown	2.5021	-1.32314	-4.49197	0.0239587	0.0467079	DOWN	551.632	551.632	551.632	26.4463	26.364	26.7	2845.15	567615	119631	226856	54336.1			45		M552T26	y
171	0	cis-4-(6-Amino-9H-purin-9-yl)-D-prolinol	1.82929	0.87128	3.56797	0.0239655	0.0467131	UP	235.13	235.13	235.131	9.34983	9.20183	9.388	52162.6	815878	218127	1.49247e+06	245561			16		M235T9	y
172	1	1-Heptadecanamine, N,N-dimethyl-, acetate	1.94425	0.959216	5.33629	0.0245013	0.0471152	UP	344.352	344.352	344.353	15.5342	15.488	15.5453	121144	3.16254e+06	256150	6.14877e+06	934813	[32][M]+		27		M344T16	y
173	-	Unknown	3.14864	1.65473	5.69467	0.0248984	0.0474063	UP	535.489	535.489	535.49	29.7379	29.6908	29.785	3284.39	55864.7	6986.33	175898	35833.8			26		M535T30	n
174	-	Unknown	186.076	7.53975	6.1806	0.0251715	0.0476032	UP	122.964	122.964	122.964	23.6456	23.5892	23.702	2576.43	1419.55	978.291	264143	73619.1			49		M123T24_1	n
175	0	3-Methylbenzoic acid	2.98281	1.57667	5.0894	0.025313	0.0477041	UP	137.06	137.06	137.06	4.32508	4.292	4.33	182410	9.472e+06	1.87292e+06	2.82531e+07	6.11112e+06			25		M137T4	y
176	0	Dicyclohexyl[3-(trimethylstannyl)propyl]phosphane	1227.99	10.2621	6.15896	0.0253637	0.0477401	UP	405.173	405.173	405.173	5.81325	5.7915	5.835	39065.2	0	0	529910	149024			42		M405T6	y
177	-	Unknown	4.87674	-2.28592	-4.26939	0.0254366	0.0477917	DOWN	186.119	186.118	186.119	5.41542	5.30733	5.518	61721.6	3.20809e+06	931236	657835	450807	[8][M+1]+		9		M186T5	n
178	0	D-erythro-Sphingosine (Sphingosine)	2110.02	11.043	6.04883	0.0262594	0.0483618	UP	286.274	286.274	286.274	23.4316	23.372	23.4912	12844	0	0	910529	260725			4		M286T23	y
179	-	Unknown	121.973	6.93042	5.96921	0.0266737	0.0486403	UP	275.277	275.277	275.277	14.5245	14.52	14.529	13916.4	9373.11	15000.8	1.14327e+06	328674			34		M275T15	n
180	1	N-cyclohexyl-4,4,4-trifluoro-2-oxo-3-(trifluoromethyl)butanamide	10.8817	-3.44383	-5.81426	0.0267597	0.0486975	DOWN	306.092	306.091	306.093	7.04267	6.98083	7.1045	6369.56	176725	47513.1	16240.5	5299.91			23		M306T7	y
181	0	Benzylamine, N,N-dioctyl-	6.53805	2.70886	3.48569	0.0270145	0.0488655	UP	332.331	332.331	332.331	31.3034	31.207	31.3998	28868.7	661605	1.14593e+06	4.32749e+06	1.41599e+06			35		M332T31	y
182	2	2-[1-(4-Fluorophenyl)ethenyl]-4,4,5,5-tetramethyl-1,3,2-dioxaborolane	2.14708	1.10238	4.54555	0.0271475	0.0489523	UP	249.146	249.146	249.146	11.1518	11.025	11.285	39412.4	536822	85040	1.1526e+06	218685			1		M249T11	y
183	1	1,3,5-Triazine-2,4,6-triamine, N,N-di-2-propenyl-	2.49368	1.31828	3.63717	0.0272039	0.048989	UP	207.135	207.135	207.136	10.1837	10.1823	10.215	8589.26	215346	126441	537004	86461.6			13		M207T10	y
184	0	Silane, trimethyl(1-naphthalenylmethyl)-	58.7664	5.87692	5.88401	0.0272652	0.0490287	UP	215.125	215.125	215.125	25.7036	25.6897	25.7175	5464.57	10969	10878.1	653060	188696			40		M215T26	y
185	0	Heptadecanoyl Ethanolamide	780.946	9.60908	5.89997	0.0275462	0.0492094	UP	314.305	314.305	314.305	23.2818	23.058	23.303	4164.25	0	0	337000	98932.7			4		M314T23	y
186	3	2-(2-Butoxyethoxy)ethanol	3.57201	-1.83674	-3.96943	0.0277406	0.0493331	DOWN	163.132	163.132	163.133	5.41542	5.30733	5.518	24862.5	1.48528e+06	411964	415811	219221			9		M163T5	y
187	0	O-Ethyl O-phenyl phenylphosphonothioate	1.64896	0.721555	4.68084	0.0277823	0.0493595	UP	279.06	279.06	279.06	6.96967	6.942	6.99733	13791.4	235053	18591.7	387592	53294.4			23		M279T7	y
188	1	Metazine	10972.2	13.4216	5.87371	0.0277829	0.0493598	UP	250.178	250.178	250.178	25.7036	25.6897	25.7175	52692	0	0	4.73482e+06	1.39621e+06	[14][M]+		40		M250T26	y
189	0	1,4-Dithia-7,10,13-triazacyclopentadecane	4.16446	-2.05813	-4.98454	0.0285556	0.0498396	DOWN	250.141	250.14	250.141	6.96967	6.942	6.99733	29473.1	598745	152591	143775	41354.8			23		M250T7	y
190	1	N-[6-(2-Azidoacetamido)pyridin-2-yl]dodecanamide	24.8149	4.63313	5.39878	0.0285756	0.0498518	UP	375.25	375.25	375.25	23.8732	23.7993	23.9472	13514.8	25122.9	33358.2	623421	189027			50		M375T24	y
191	1	N,N-Dimethyldodecylamine-N-oxide	19.9153	4.31581	4.98914	0.0286651	0.0499062	UP	230.248	230.248	230.248	31.7967	31.7778	31.8155	3125.99	16338.4	28299	331115	105551			15		M230T32	y
192	0	([1,1'-Biphenyl]-4-yl)(phenyl)methanethione	2.4337	1.28315	4.23322	0.0287192	0.049939	UP	275.089	275.089	275.089	5.81183	5.78867	5.835	11584.5	236733	127128	576138	55885.6			42		M275T6	y
193	-	Unknown	13.1151	3.71316	4.6518	0.0288205	0.0500002	UP	110.009	110.008	110.009	5.81183	5.78867	5.835	6840.96	28327	40990.4	371512	121029			42		M110T6	n
194	0	3-Chloro-4-(ethylsulfanyl)-5-(2,4,6-trimethylphenyl)furan-2(5H)-one	2.72765	1.44766	3.7401	0.0288696	0.0500298	UP	297.071	297.071	297.071	6.06917	6.016	6.20383	11418.5	160123	65572.9	436760	110058			33		M297T6	y
195	-	Unknown	5.1181	2.35561	3.48967	0.0290503	0.0501379	UP	280.161	280.161	280.161	12.2397	12.198	12.2897	14640.8	92950	112083	476464	153854	[22][M+1]+		31		M280T12	n
196	-	Unknown	1.46009	0.546061	3.31963	0.0299495	0.0507649	UP	337.854	337.854	337.855	31.3034	31.207	31.3998	1535.41	142360	22764	207859	25489.5			35		M338T31	n
197	-	Unknown	2.13521	-1.09437	-3.63192	0.0303528	0.0510389	DOWN	589.429	589.429	589.429	23.1842	23.1623	23.3825	16943.1	450449	97322	210963	59769.4			4		M589T23	y
198	-	Unknown	3.17555	-1.667	-3.31252	0.0307349	0.0512944	DOWN	678.572	678.572	678.572	31.3887	31.207	31.5762	21163.6	3.04654e+06	707003	959232	831464	[60][M+1]+		35		M679T31	n
199	1	4-Octyloxyphenylboronic acid	1520.08	10.5699	5.52761	0.0312046	0.0516034	UP	251.181	251.181	251.181	21.4449	21.4275	21.4623	4975.02	0	0	655954	205540			48		M251T21	y
200	-	Unknown	5.71327	2.51432	5.47257	0.0315292	0.0518137	UP	507.868	507.868	507.868	29.1243	29.105	29.1437	130467	455585	30283.1	2.60288e+06	678937			22		M508T29	n
201	0	Phytosphingosine	6754.02	12.7215	5.47926	0.0317317	0.0519435	UP	318.3	318.3	318.3	15.1661	15.14	15.1922	16251.2	0	0	2.91454e+06	921318			27		M318T15	y
202	-	Unknown	7.72006	2.94861	3.5636	0.0317851	0.0519776	UP	539.529	539.528	539.53	31.7967	31.7778	31.8155	3732.92	38774.7	67159.7	301564	108644			15		M540T32	n
203	0	2,2-Diphenyl-1-(trimethylsilyl)cyclopropane-1-carboxylic acid	10.3822	3.37604	4.31729	0.0320134	0.0521224	UP	311.146	311.146	311.146	11.934	11.9212	11.9382	7083.72	36235.4	47176.3	376204	127973			11		M311T12	y
204	1	Ethyl bromodifluoroacetate	69.5822	6.12065	5.41687	0.0322013	0.0522407	UP	202.951	202.951	202.951	19.2722	19.27	19.2745	13032.3	36730.6	32560.6	2.5558e+06	804816			21		M203T19	y
205	-	Unknown	4.181	2.06385	3.48175	0.0327893	0.0526055	UP	507.456	507.452	507.459	29.8157	29.785	29.8463	4052.66	51297.9	43765.2	214477	68367.5			26		M507T30	n
206	0	Acetamide, N-decyl-2,2,2-trifluoro-	1.45097	-0.537017	-3.1834	0.0335493	0.0530651	DOWN	254.173	254.173	254.173	9.653	9.61567	9.7835	61478.7	1.66912e+06	204630	1.15035e+06	194412			19		M254T10	y
207	8	3-Fluoro-2-(hexadecyloxy)propan-1-ol	117.738	6.87944	5.30946	0.0335788	0.0530827	UP	319.303	319.303	319.303	23.4891	23.487	23.4912	2793.59	459.029	795.062	87916.9	28519.4			4		M319T23	y
208	2	6-(4-Methylpiperazin-1-yl)-N-[2-(pyrrolidin-1-yl)ethyl]pyridazin-3-amine	2.76682	1.46823	3.66319	0.0337518	0.0531854	UP	291.23	291.229	291.23	18.6258	18.578	18.7942	3363.23	53197.6	39105.8	147188	21112.5			30		M291T19	y
209	2	2,4,6(1H,3H,5H)-Pyrimidinetrione, 1,3-bis(2-methoxyethyl)-	4.28352	2.0988	3.48062	0.0339796	0.0533197	UP	245.113	245.112	245.113	9.653	9.61567	9.7835	7716.59	81925.2	113928	350928	70283.9			19		M245T10_1	y
210	0	2-(octadecylsulfanyl)naphthalene	2.4401	-1.28694	-3.814	0.0340962	0.0533879	DOWN	413.324	413.324	413.324	23.7988	23.7832	23.8145	20159.6	472915	114236	193810	54916.8			50		M413T24_2	y
211	0	Silane, trimethyl(1-naphthalenylmethyl)-	1638.32	10.678	5.27435	0.0341179	0.0534006	UP	215.125	215.125	215.125	19.27	19.14	19.2745	3100.04	0	0	706981	232166			21		M215T19_2	y
212	2	Phosphoroselenoic acid	3.90336	1.96472	3.31949	0.0342277	0.0534646	UP	162.907	162.907	162.907	30.612	30.5185	30.6325	5896.27	180034	158182	702738	222181			36		M163T31	y
213	3	(2-Chloroethyl)carbamyl azide	6.19415	2.63091	4.79154	0.0342752	0.0534922	UP	149.023	149.023	149.023	19.27	19.14	19.2745	17672.8	278817	110221	1.72704e+06	511769			21		M149T19	y
214	1	1-Iodo-10-undecene	4.07648	2.02733	3.44333	0.0344341	0.0535842	UP	281.076	281.076	281.076	7.37767	7.37267	7.405	9766.72	118084	97155.6	481367	154770			17		M281T7	y
215	4	Elocalcitol	3.31687	-1.72982	-3.1523	0.034467	0.0536031	DOWN	443.334	443.333	443.334	31.3746	31.3605	31.3887	15075.2	2.39395e+06	641675	721605	657721			35		M443T31	y
216	2	1,1,1,2-tetrachloro-2-fluoroethane	4.7558	2.24969	4.68335	0.0348302	0.0538112	UP	184.889	184.888	184.889	25.7036	25.6897	25.7175	3202.31	114791	155246	545923	36358			40		M185T26	y
217	1	1-Heptadecanamine, N,N-dimethyl-, acetate	5.97848	2.57978	4.45725	0.034835	0.0538139	UP	344.352	344.352	344.353	29.403	29.277	29.5717	18018.5	258197	140047	1.54362e+06	479473			22		M344T29	y
218	1	Convicine	16.9869	-4.08635	-5.19248	0.0348711	0.0538344	DOWN	306.093	306.093	306.093	5.4535	5.389	5.518	6607.55	216584	67929.4	12750.1	2935.9			9		M306T5	y
219	0	N-{4-[(E)-{(2Z)-[Amino(nitroamino)methylidene]hydrazinylidene}methyl]phenyl}acetamide	3.40101	1.76596	4.5845	0.0352336	0.0540629	UP	265.104	265.104	265.104	6.1365	6.06917	6.20383	11970.3	168807	37599.6	574116	148440			33		M265T6	y
220	2	Ceramide (Cer(d18:1/20:0))	2.16169	1.11216	3.82584	0.0356094	0.0542969	UP	594.583	594.582	594.584	29.34	29.277	29.403	1675	64015.4	13943.9	138381	30643.9			22		M595T29	y
221	1	10,13-dimethyl-17-(6-methylheptan-2-yl)-2,3,4,5,6,7,8,9,11,12,14,15,16,17-tetradecahydro-1H-cyclopenta[a]phenanthren-3-amine	1.53651	-0.619656	-3.11574	0.0356855	0.0543439	DOWN	388.394	388.394	388.394	29.4521	29.403	29.5012	5363.85	353382	48112.7	229990	48890.5			7		M388T29	y
222	-	Unknown	1.68017	0.748606	3.29159	0.0366861	0.055169	UP	361.366	361.366	361.366	18.745	18.578	18.7505	26872.3	870881	174065	1.46323e+06	258565	[36][M+1]+		30		M361T19	n
223	0	2-(1,1,1,3,3,3-hexafluoropropan-2-ylidene)-3,4-dihydronaphthalen-1(2h)-one	4.08374	2.02989	4.61559	0.0369329	0.0553694	UP	295.055	295.055	295.055	6.1365	6.06917	6.20383	23506.6	194814	47661.2	795568	220344			33		M295T6	y
224	-	Unknown	22.9192	4.51848	4.61991	0.0372176	0.0555989	UP	759.222	759.222	759.222	31.4322	31.3998	31.4647	4643.6	11817.3	20468.2	277437	97457.1			35		M759T31	y
225	0	Guanine, 8-(p-nitrophenyl)-	1.93689	0.953743	3.18446	0.0373084	0.0556719	UP	273.073	273.072	273.074	5.05017	4.93267	5.15317	28407.6	1.05292e+06	320455	2.03939e+06	430338			44		M273T5	y
226	-	Unknown	5.52235	-2.46528	-4.87243	0.0384005	0.0565358	DOWN	278.18	278.18	278.18	14.5237	14.52	14.529	49539	1.5979e+06	463317	289351	41403.3	[21][M+1]+		34		M278T15	n
227	-	Unknown	3.09535	-1.6301	-3.04261	0.0385517	0.0566535	DOWN	473.377	473.376	473.377	28.835	28.7987	28.8713	2273.71	91678.3	24142.9	29474.2	25904.3			14		M473T29	y
228	0	Adenosine, 2-amino-3'-deoxy-	2.20419	1.14025	3.02961	0.0389332	0.0569488	UP	267.12	267.12	267.12	6.41575	6.4015	6.43	12543.9	199319	94456.9	439337	99535.1			24		M267T6	y
229	2	2,6-Bis[(dec-4-en-1-yl)oxy]anthracene	1.63849	-0.712369	-4.60796	0.0397461	0.0575689	DOWN	487.361	487.36	487.362	22.0278	21.9813	22.0742	14236.6	988678	142874	603407	23641.6			43		M487T22	y
230	1	1-Dodecanamine acetate	189.828	7.56855	4.85289	0.0398849	0.0576737	UP	246.243	246.242	246.243	25.7036	25.6897	25.7175	2084.05	659.675	1142.59	179836	63939.7			40		M246T26	y
231	1	Dodecanoic acid, ammonium salt	3.90692	1.96603	4.48737	0.0407818	0.0583417	UP	218.211	218.211	218.212	6.43	6.4015	6.5475	56937.8	462637	95168.8	1.80749e+06	510291			24		M218T6	y
232	2	(1-Hydroxyethane-1,1-diyl)bis(phosphonate)	17.0935	4.09537	4.57671	0.0407991	0.0583545	UP	202.951	202.951	202.951	11.6704	11.603	11.7378	1130.28	3760.23	3638.89	66734.2	23553			2		M203T12	y
233	0	2-{4-[(Ethylsulfanyl)methyl]phenyl}-4,4,5,5-tetramethyl-1,3,2-dioxaborolane	4.75617	2.2498	4.45667	0.0413758	0.0587764	UP	279.159	279.158	279.159	19.27	19.14	19.2745	41376.8	827310	220666	3.93483e+06	1.18738e+06	[23][M]+		21		M279T19	y
234	0	Stannanediamine	361.897	8.49943	4.75803	0.0414452	0.0588267	UP	152.947	152.947	152.947	5.81325	5.7915	5.835	2642.91	0	0	156168	56849.5			42		M153T6	y
235	1	N,N-Dimethyldodecylamine-N-oxide	26.7544	4.7417	4.65879	0.0414949	0.0588628	UP	230.248	230.248	230.248	22.4746	22.465	22.4842	2208.6	7934.37	7590.99	212279	75591.4			41		M230T22	y
236	8	3-Fluoro-2-(hexadecyloxy)propan-1-ol	535.369	9.06439	4.74596	0.0416433	0.0589701	UP	319.303	319.303	319.303	19.3412	19.289	19.3933	3137.53	0	0	231026	84313.7			21		M319T19	y
237	0	n-adenosylaziridine	15.2363	3.92944	4.41519	0.0416802	0.0589968	UP	293.136	293.136	293.136	9.36783	9.34983	9.388	10040.6	55148	58909.3	842444	303181			16		M293T9	y
238	0	Oxibendazole	55.5579	5.79592	4.65845	0.0420986	0.0592971	UP	250.119	250.119	250.119	29.7499	29.7148	29.785	2392.66	3721.94	6446.6	222767	81187.1			26		M250T30	y
239	2	O,O-Dipropyl amino(imino)methylamidothiophosphate	3.51152	1.8121	3.87028	0.042605	0.0596568	UP	240.092	240.092	240.092	5.11425	5.11283	5.11567	16376.1	434549	160714	1.52593e+06	461223			44		M240T5	y
240	1	1-Dodecanamine acetate	246.994	7.94833	4.67053	0.0428987	0.0598634	UP	246.243	246.243	246.243	23.4891	23.487	23.4912	2174.87	283.814	491.58	141157	52239.9			4		M246T23	y
241	-	Unknown	4.79981	2.26298	4.14251	0.0433214	0.0601583	UP	700.647	700.647	700.647	29.1243	29.105	29.1437	1473.43	17846.3	7015.22	85659.1	27472			22		M701T29	n
242	3	4-Butoxy-1,1,1-trifluoro-4-methoxybutane	45.5662	5.50989	4.59609	0.043474	0.0602641	UP	215.126	215.125	215.126	9.61567	9.60133	9.653	5211.02	6983.11	8046.27	324748	119480			19		M215T10	y
243	1	Silane, [6-[4-(1,1-dimethylethyl)phenyl]-1,3,5-hexatriynyl]trimethyl-	4.74723	2.24708	3.21319	0.0435509	0.0603172	UP	279.157	279.157	279.157	12.2397	12.198	12.2897	100423	543804	561044	2.58224e+06	944779	[22][M]+		31		M279T12	y
244	-	Unknown	7.97631	2.99572	4.31537	0.0455065	0.0616648	UP	314.334	314.334	314.334	29.34	29.277	29.403	24393.8	55179.6	24280.5	440130	152587			22		M314T29	n
245	-	Unknown	46.5044	5.53929	4.42947	0.0459312	0.0619498	UP	169.976	169.976	169.976	13.5172	13.471	13.5633	2701.65	5015.32	8686.78	246613	94071.3			10		M170T14	y
246	1	3-Oxooctanoic acid glycerides	4.48357	2.16465	3.05359	0.0463033	0.0621973	UP	250.141	250.141	250.142	4.959	4.93433	5.05733	3744.21	62056.8	103111	278881	67036.1			44		M250T5	y
247	2	(9R,13R)-1a,1b-dihomo-jasmonic acid	8.83005	3.14242	3.71282	0.0464597	0.0623007	UP	239.164	239.164	239.164	12.2397	12.198	12.2897	20433.8	56488.7	68531	500068	195255			31		M239T12	y
248	0	m-Dioxane, 5-equatorial-((4,6-bis(1-aziridinyl)-s-triazin-2-yl)amino)-2,2,5-trimethyl-	1961.6	10.9378	4.44391	0.0470892	0.0627135	UP	307.188	307.188	307.188	15.1661	15.14	15.1922	12155.8	0	0	846485	329924			27		M307T15	y
249	1	(2E)-[2-(Methanesulfonyl)hydrazinylidene]acetic acid	75.2576	6.23377	4.43219	0.047181	0.0627732	UP	167.012	167.012	167.013	11.7378	11.735	11.9382	3448.26	2998.09	2600.76	236455	91195.2			2		M167T12	y
250	0	1-Isothiocyanato-4-phenylbutane	2.96666	1.56884	3.36651	0.0476848	0.0630989	UP	192.084	192.084	192.084	31.3034	31.207	31.3998	3734.94	178300	75860	528956	163686			35		M192T31	y
251	0	Sodium cyclohexyl succinate	7.36888	2.88145	4.09516	0.047765	0.0631504	UP	223.094	223.094	223.094	7.405	7.37767	7.59033	47500.7	330144	177767	2.43279e+06	871368			17		M223T7	y
252	-	Unknown	1.52982	-0.613365	-2.88598	0.047834	0.0631946	DOWN	356.285	356.285	356.286	21.9089	21.6685	22.0742	4019.87	287873	36899.6	188174	47103	[34][M+1]+		43		M356T22	n
253	-	Unknown	75.8967	6.24597	4.37065	0.0481075	0.0633694	UP	122.964	122.964	122.964	11.603	11.603	11.603	8827.67	10387.3	16048.7	799278	312218			2		M123T12	n
254	1	3,6,9-Trioxa-12-azatetracosan-1-ol	3.49681	1.80604	4.23246	0.0488396	0.0638321	UP	362.327	362.327	362.327	11.9276	11.9212	11.934	447610	2.96715e+06	375539	1.03756e+07	3.0084e+06			11		M362T12	y
255	1	2-N-butyl-6-N-methyl-7H-purine-2,6-diamine	2.19201	1.13225	3.48097	0.0492262	0.0640736	UP	221.151	221.151	221.151	11.934	11.9212	11.9382	33313.8	400479	88194	877852	220550			11		M221T12	y
256	6	2-(2-{2-[2-(2,3,4-Tributylphenoxy)ethoxy]ethoxy}ethoxy)ethan-1-ol	3.14915	-1.65496	-3.19507	0.0499879	0.0645436	DOWN	439.339	439.339	439.339	30.6325	30.534	30.6345	3172.97	238815	78657.2	75834.9	40238			36		M439T31	y
257	7	1,2,3-Thiadiazole-4-carboxamide	743.976	9.53911	4.30176	0.0500146	0.06456	UP	130.008	130.008	130.008	0.525167	0.525	0.529	8819.98	2038.75	3531.22	1.73081e+06	696060			32		M130T1	y
258	1	2-(Butan-2-yl)-4-methylquinoline	4.57261	2.19302	3.2255	0.05032	0.0647462	UP	200.143	200.143	200.143	31.7267	31.638	31.8155	2252	56477.5	97821.9	259565	48207.4			15		M200T32	y
259	8	Methoprene	5.90701	2.56243	3.08489	0.0506318	0.0649351	UP	311.256	311.256	311.256	23.6565	23.611	23.702	2142.65	20556.1	27718.5	121425	49387.3			49		M311T24	y
260	-	Unknown	1.33143	-0.412973	-3.61624	0.0512075	0.0652807	DOWN	229.199	229.199	229.199	11.603	11.603	11.603	63752.2	1.57568e+06	178552	1.18345e+06	58411	[12][M+1]+		2		M229T12	n
261	0	N-Benzylhexadecan-1-amine	3.06716	1.6169	2.96058	0.0513554	0.0653688	UP	332.331	332.331	332.331	29.403	29.277	29.5163	24676.4	767856	495739	2.35514e+06	785226	[30][M]+		22		M332T29	y
262	0	1,4-beta-D-Glucan	15.1181	3.91821	3.74567	0.0516893	0.0655668	UP	537.166	537.166	537.166	31.7967	31.7778	31.8155	127866	224658	389119	3.40075e+06	1.41619e+06			15		M537T32	y
263	3	TG(12:0/12:0/17:2(9Z,12Z))[iso3]	7.65012	2.93548	4.08529	0.0522412	0.065891	UP	705.6	705.6	705.601	29.34	29.277	29.403	12067.2	91995.3	32047.9	703775	257390			22		M706T29	y
264	1	Sodium 1-methyl cis-camphorate	7.96211	2.99315	4.07892	0.0523584	0.0659593	UP	237.11	237.11	237.11	9.61567	9.60133	9.653	62856.7	399988	147099	3.18475e+06	1.17332e+06			19		M237T10	y
265	6	(3E)-1-Phenyl-3-(phenylimino)butan-1-one--copper (2/1)	16.1503	4.01349	3.76998	0.052422	0.0659963	UP	538.164	538.164	538.164	31.7967	31.7778	31.8155	85874.9	147054	254705	2.37961e+06	993581			15		M538T32	y
266	1	5-{[2-Ethoxy-4-({1-[2-(4-methoxyanilin	15.0274	3.90952	3.71378	0.0526348	0.0661199	UP	536.166	536.166	536.166	31.7967	31.7778	31.8155	253336	447264	774684	6.72553e+06	2.82375e+06			15		M536T32	y
267	-	Unknown	3.65175	1.86859	4.0749	0.0529067	0.066277	UP	595.584	595.584	595.584	31.3034	31.207	31.3998	1915.37	60104.3	7711.84	219486	67305.5			35		M596T31	y
268	1	DL-Alanine, N,N'-(1,4-dioxo-1,4-butaned	7.73735	2.95184	3.37532	0.0529073	0.0662774	UP	261.108	261.108	261.108	9.61567	9.60133	9.653	10592.8	59796.6	76673.3	463780	192605			19		M261T10	y
269	-	Unknown	2.9447	-1.55812	-2.75897	0.0530907	0.0663828	DOWN	561.401	561.396	561.405	31.3746	31.207	31.5762	4399.1	656108	172472	222666	210470			35		M561T31	y
270	-	Unknown	1756.56	10.7785	4.14778	0.0535036	0.0666188	UP	251.181	251.181	251.181	25.7036	25.6897	25.7175	7457.21	0	0	758001	316530	[14][M+1]+		40		M251T26	n
271	0	(2-Fluoro-5-phenoxyphenyl)boronic acid	1.55008	0.632338	3.5578	0.0537609	0.066765	UP	233.078	233.077	233.079	6.43	6.4015	6.6305	18714.2	430365	109821	667099	34955.3			24		M233T6	y
272	-	Unknown	4.16228	-2.05737	-3.95817	0.0548832	0.067541	DOWN	268.151	268.15	268.151	11.2184	11.1518	11.285	199269	6.8971e+06	310722	1.65705e+06	2.27184e+06	[19][M+2]+		1		M268T11_1	n
273	2	2-carboxybenzenesulfonate	4.87269	2.28472	3.65871	0.0564731	0.0686168	UP	201.993	201.993	201.993	5.81325	5.7915	5.835	3486.21	42331.8	18548	206270	75360.2			42		M202T6	y
274	0	N,N'-Bisacrylylcystamine	43.7516	5.45126	3.99508	0.0567152	0.0687782	UP	261.072	261.072	261.073	5.41542	5.405	5.42583	1856.91	4226.01	4591.3	191188	80926.4			9		M261T5	y
275	-	Unknown	801.869	9.64722	3.99767	0.0572519	0.0691338	UP	275.277	275.277	275.277	21.5492	21.4623	21.636	2819.8	0	0	346028	149922			48		M275T22	n
276	1	1-[4-Fluoro-3-(4,4,5,5-tetramethyl-1,3,2-dioxaborolan-2-yl)phenyl]pentan-1-one	504.733	8.97938	3.9919	0.0574036	0.0692338	UP	307.188	307.188	307.188	25.7036	25.6897	25.7175	2007.81	0	0	217806	94504			40		M307T26	y
277	7	Pelargonidin 3-sophoroside 5-glucoside	61.8375	5.95041	3.96586	0.0574357	0.0692549	UP	758.221	758.221	758.222	29.34	29.277	29.403	4190.2	2786.38	4826.16	190093	81661.8			22		M758T29	y
278	7	N-Oleoyl Glycine	3.17387	1.66624	3.91818	0.0578029	0.0694958	UP	340.282	340.282	340.283	11.7367	11.735	11.7378	78737.3	407717	390364	1.2945e+06	35842.6			2		M340T12	y
279	-	Unknown	624.737	9.28711	3.9016	0.0598551	0.0708167	UP	138.063	138.063	138.063	6.96825	6.942	6.9945	5913.46	0	0	269591	119681			23		M138T7	y
280	9	PE-Cer(d14:2(4E,6E)/16:0(2OH))	1.64426	-0.717439	-3.37357	0.0598924	0.0708403	DOWN	619.439	619.439	619.441	21.5042	21.3022	21.6625	10267.4	503556	30901.4	306251	96471.7			48		M619T22	y
281	-	Unknown	2.13554	1.0946	3.68213	0.0628891	0.0726942	UP	345.356	345.355	345.356	15.5342	15.488	15.5453	29359.8	774455	55835.3	1.65388e+06	409891	[32][M+1]+		27		M345T16	n
282	0	Phytosphingosine	162.774	7.34673	3.77246	0.0635314	0.0730807	UP	318.3	318.3	318.301	25.7036	25.6897	25.7175	12607.6	10511.6	18206.5	1.75783e+06	802042	[29][M]+		40		M318T26	y
283	2	2-Allylphenol	4.2802	2.09768	3.66372	0.0643073	0.0735425	UP	135.08	135.08	135.08	4.32692	4.32383	4.33	80398.9	2.70834e+06	496338	1.15923e+07	4.1705e+06	[1][M]+		25		M135T4	y
284	-	Unknown	1.63926	-0.713045	-2.75083	0.0643164	0.0735479	DOWN	604.456	604.454	604.458	31.3444	31.289	31.3998	1856	193124	40716.1	117812	24307.8			35		M604T31	n
285	1	Silane, trimethyl(1-naphthalenylmethyl)-	216.642	7.75917	3.73291	0.0648291	0.0738501	UP	215.125	215.125	215.125	13.6259	13.5828	13.669	2280.66	726.249	1257.9	219661	101577			10		M215T14	y
286	1	Ile Ile Pro Val	1.25683	-0.329784	-3.08202	0.0650521	0.0739809	DOWN	441.307	441.304	441.309	31.3942	31.3605	31.5762	9219.23	611590	25718.5	486615	65355.8			35		M441T31	y
287	-	Unknown	1.77107	-0.824621	-3.47973	0.0654203	0.0741957	DOWN	575.413	575.413	575.414	21.4449	21.289	21.6625	19594.6	803372	170511	453608	35152.2			48		M575T21	n
288	1	Urea, N-(2,6-dimethylphenyl)-N'-((hydroxyamino)iminomethyl)-, monohydrochloride	3.35251	1.74524	3.36794	0.0664927	0.074815	UP	259.095	259.095	259.095	7.39133	7.37767	7.405	15767.1	167665	48503.2	562097	196963			17		M259T7	y
289	-	Unknown	2.46015	1.29875	2.71704	0.0666006	0.0748767	UP	123.94	123.94	123.941	30.534	30.5185	30.612	2380.06	125125	100188	307826	59389.9			36		M124T31_1	n
290	-	Unknown	4.56741	2.19138	3.5432	0.0671403	0.0751842	UP	160.106	160.106	160.107	31.638	31.5762	31.8155	3867.48	107332	185904	491542	26732.5			15		M160T32	y
291	5	1,1,1-Trifluorododec-3-yn-2-one	229.319	7.84121	3.64735	0.0676329	0.0754627	UP	235.132	235.131	235.132	23.4891	23.487	23.4912	5874.97	0	0	98957.2	46992.7			4		M235T23	y
292	1	N,N-Dimethyldodecylamine-N-oxide	34.0386	5.0891	3.5704	0.0680739	0.0757103	UP	230.248	230.247	230.248	29.34	29.277	29.403	3005.95	7458.87	12919.1	263682	123624			22		M230T29	y
293	-	Unknown	4.69218	2.23026	3.49657	0.0686929	0.0760552	UP	611.185	611.185	611.185	29.8463	29.785	29.8875	91372.7	1.14123e+06	301336	5.35487e+06	2.06539e+06	[56][M+1]+		26		M611T30	n
294	2	2-carboxybenzenesulfonate	754.845	9.56004	3.61164	0.0688394	0.0761363	UP	201.993	201.993	201.993	19.3559	19.289	19.4228	3374.97	552.946	957.73	634546	304045			21		M202T19	y
295	6	1-Oleoyl-2-acetyl-sn-glycerol	1.40042	-0.48586	-2.52606	0.0691471	0.0763063	DOWN	399.308	399.307	399.308	21.8448	21.636	22.0742	26699.2	1.26574e+06	150836	903827	197048			43		M399T22	y
296	9	PG(17:0/14:1(9Z))	3.65729	-1.87077	-3.16188	0.0700281	0.0767887	DOWN	707.492	707.492	707.492	23.7502	23.7172	23.7832	1775.94	177319	67536.5	48483.9	20485.7			49		M707T24	y
297	-	Unknown	1.89713	0.923817	2.50277	0.0700887	0.0768217	UP	540.447	540.447	540.447	23.2818	23.084	23.303	4387.37	72744.6	27881.3	138006	35530.9			4		M540T23	n
298	-	Unknown	2.62353	-1.39151	-2.78169	0.0702022	0.0768833	DOWN	582.475	582.474	582.475	31.3887	31.3605	31.5762	2534.92	337966	58546.4	128677	116424			35		M582T31	n
299	-	Unknown	1.76666	0.821027	2.4652	0.0706431	0.0771218	UP	665.562	665.561	665.562	31.3034	31.207	31.3998	2090.06	158218	55692.6	279517	64511.1			35		M666T31	y
300	1	(7,10-Dimethyl-6,11-dihydro-5H-benzo(a)carbazol-9-yl)acetonitrile	1.81048	-0.856376	-3.41615	0.0707972	0.0772048	DOWN	287.154	287.153	287.156	30.5843	30.534	30.6345	11250.9	1.84282e+06	412929	1.01786e+06	66628.4			36		M287T31	y
301	-	Unknown	2.86114	-1.51659	-2.45691	0.0709411	0.0772822	DOWN	539.425	539.421	539.425	31.3887	31.3605	31.5762	4123.34	609258	209808	212798	184654			35		M539T31	n
302	1	2,6-Bis[(dec-4-en-1-yl)oxy]anthracene	1.36147	-0.445167	-3.46409	0.0711484	0.0773933	DOWN	487.36	487.36	487.361	21.4449	21.289	21.6685	14236.6	978865	128992	718975	15712.2			48		M487T21	y
303	7	PE(O-16:0/18:1(9Z))	3.41371	-1.77134	-2.42778	0.0723834	0.0780488	DOWN	704.554	704.552	704.556	25.8858	25.874	25.8975	359.78	29061.1	10119.9	8369.2	10747.5			40		M705T26	y
304	-	Unknown	4.54272	2.18356	3.4537	0.0725483	0.0781355	UP	612.183	612.183	612.183	29.8463	29.785	29.8875	69546.9	879480	154015	3.99523e+06	1.55496e+06	[56][M+2]+		26		M612T30	n
305	-	Unknown	2.75424	-1.46166	-2.61498	0.0729986	0.078371	DOWN	689.524	689.516	689.531	25.8858	25.874	25.8975	1099.56	59566.5	21612.5	21627.2	12821.3			40		M690T26	y
306	-	Unknown	2.51187	1.32876	2.875	0.07381	0.0787918	UP	226.053	226.053	226.053	6.48875	6.43	6.5475	22410.8	261859	90475	657757	220683	[10][M+1]+		24		M226T6	n
307	0	D-erythro-Sphingosine (Sphingosine)	2.6271	1.39347	3.42986	0.0738303	0.0788023	UP	286.274	286.274	286.274	28.8428	28.6242	28.843	29671.1	1.89286e+06	1.54911e+06	4.97273e+06	138710			14		M286T29_1	y
308	2	Euparin	2.51493	1.33052	2.49583	0.0743771	0.0790831	UP	217.086	217.085	217.086	6.9945	6.942	6.99733	23984.6	430237	259445	1.08202e+06	370514			23		M217T7	y
309	8	Peonidin 3-rhamnoside 5-glucoside	4.9852	2.31765	3.36503	0.0743851	0.0790872	UP	610.184	610.184	610.184	29.8463	29.785	29.8875	169295	1.95146e+06	531821	9.72842e+06	3.96747e+06	[56][M]+		26		M610T30	y
310	1	Naphthalene, 2-(dodecyloxy)-6-(4-octylphenyl)-	1.84188	-0.881181	-3.00402	0.0748631	0.0793309	DOWN	501.408	501.395	501.409	31.3942	31.3605	31.5762	5575.32	820765	205343	445612	67985.9			35		M501T31_2	y
311	3	Oxaziridine-2-sulfonic acid	142.929	7.15915	3.44401	0.0748972	0.0793482	UP	125.986	125.986	125.986	5.7915	5.78867	5.835	18122.9	14060.5	16415.7	2.03021e+06	1.01382e+06			28		M126T6	y
312	-	Unknown	3.19533	-1.67596	-2.45726	0.0750521	0.0794268	DOWN	499.395	499.394	499.398	31.3746	31.207	31.5762	4237.35	607304	235875	189916	175839			35		M499T31	y
313	-	Unknown	4.03676	2.0132	2.45927	0.0751038	0.079453	UP	458.351	458.35	458.351	31.7967	31.7778	31.8155	2523.29	48478.5	83967.2	196857	62210.9			15		M458T32	y
314	-	Unknown	7.70291	2.9454	2.77823	0.0753282	0.0795664	UP	579.552	579.552	579.552	31.7967	31.7778	31.8155	2763.73	36382.3	63016	282466	139878			15		M580T32	y
315	1	Adenosine, 2-amino-3'-deoxy-	119.032	6.8952	3.43029	0.0753325	0.0795686	UP	267.12	267.12	267.12	11.2184	11.1518	11.285	8146.05	3787.78	6560.62	485108	242944			1		M267T11_1	y
316	1	Menthol N-methylcarbamate	1.39123	0.476357	2.75626	0.0762224	0.0800151	UP	214.18	214.18	214.18	9.653	9.61567	9.7835	28188.4	1.04505e+06	106368	1.4539e+06	233871			19		M214T10	y
317	1	1,1,1,3-tetrachlorotridecane	3.7452	1.90504	3.38947	0.0763406	0.080074	UP	321.071	321.071	321.071	7.37767	7.29183	7.405	33767.6	255797	21563.6	958011	358190			17		M321T7	y
318	1	Monoethanolamine myristate	1.69516	0.761419	2.51743	0.0771978	0.0804982	UP	290.269	290.269	290.269	11.934	11.9212	11.9382	22811.2	354661	90331.9	601206	143576			11		M290T12	y
319	1	Alepric acid	2.25476	1.17297	2.58546	0.0772065	0.0805025	UP	225.185	225.185	225.185	14.5218	14.4955	14.529	8318.01	108148	79131.4	243849	44749.5			34		M225T15	y
320	1	Sodium capryloyl proline	2.54929	1.35009	2.39538	0.0776203	0.0807055	UP	264.157	264.157	264.157	8.05475	7.98733	8.12217	14146.6	272201	191414	693917	237372			6		M264T8	y
321	1	1-Phenoxy-2,3-ditetradecylbenzene	4.14378	2.05095	3.03556	0.0777848	0.0807859	UP	563.517	563.515	563.52	31.3034	31.207	31.3998	3062.95	99251.8	171909	412469	48860.1			35		M564T31	y
322	-	Unknown	1.92065	0.941592	2.72308	0.0779306	0.080857	UP	261.262	261.261	261.262	28.6253	28.6242	28.6263	3464.83	278476	148251	534853	67928.9			14		M261T29	n
323	2	3-Piperidinecarboxamdie, N-butyl-5-phe	91.1117	6.50956	3.36753	0.0779343	0.0808588	UP	255.15	255.15	255.15	25.7036	25.6897	25.7175	3481.25	3411.77	2954.7	323958	164843			40		M255T26	y
324	7	Threoninyl-Threonine	4.204	2.07176	3.05597	0.0782121	0.0809938	UP	221.115	221.115	221.115	7.37767	7.29183	7.405	26314.2	347945	163920	1.46276e+06	610219			17		M221T7	y
325	-	Unknown	8.70362	3.12162	2.90116	0.0782426	0.0810086	UP	122.964	122.964	122.964	5.746	5.657	5.835	13879.3	97564.6	148836	849166	423319			28		M123T6	n
326	9	Dimexano	19.448	4.28155	3.30843	0.0786685	0.0812146	UP	214.93	214.93	214.931	21.7362	21.636	21.8365	1395.2	7327.4	6632.56	145300	71927.4			43		M215T22	y
327	1	Ammonium tetrafluorosuccinate	2.63689	1.39884	3.13702	0.0807973	0.0823476	UP	225.05	225.05	225.05	6.48875	6.43	6.5475	184599	2.22673e+06	376306	5.87166e+06	1.97699e+06	[10][M]+		24		M225T6_2	y
328	0	Tridodecylamine	2.36801	-1.24367	-3.00468	0.0811006	0.0825066	DOWN	522.597	522.597	522.598	30.6894	30.6345	30.7443	70449.6	4.24633e+06	1.36676e+06	1.79321e+06	362859	[52][M]+		36		M523T31_2	y
329	5	alpha-Aspartylleucine	2.47663	1.30838	2.59623	0.0811423	0.0825285	UP	247.13	247.13	247.13	9.63433	9.61567	9.653	8332.16	166996	74994.1	413587	146423			19		M247T10	y
330	8	PG(16:0/16:1(9Z))	3.51536	-1.81367	-3.13823	0.0817999	0.0828712	DOWN	721.507	721.507	721.507	23.3457	23.309	23.3825	3239.73	105488	41031.6	30007.7	7202.18			4		M722T23	y
331	-	Unknown	698.909	9.44896	3.25402	0.0828696	0.083423	UP	275.277	275.277	275.277	19.205	19.14	19.27	3092.62	209.873	363.511	347748	184987			21		M275T19_2	n
332	-	Unknown	2.39461	-1.25979	-2.73918	0.0843967	0.0841988	DOWN	459.36	459.356	459.362	28.7987	28.6263	28.8713	2178.47	226904	77988.5	94756.4	30002.3			14		M459T29	y
333	5	PE-Cer(d14:2(4E,6E)/16:0(2OH))	2.06207	-1.0441	-2.33821	0.0848533	0.084428	DOWN	619.441	619.44	619.443	28.6318	28.6242	28.6393	6125.51	428837	131147	207964	97825.6			14		M619T29	y
334	9	Carbanilic acid, n-decyl ester	1.3849	0.469779	2.34328	0.0850866	0.0845447	UP	278.209	278.209	278.209	14.3687	14.347	14.3893	49539	1.57016e+06	360525	2.17452e+06	263765			38		M278T14	y
335	6	Dihexadecyl (R(R*,R*))-tartrate	1.49127	-0.576539	-2.32539	0.0851765	0.0845896	DOWN	599.528	599.527	599.53	25.8858	25.874	25.8975	1097.38	48519.8	7230.89	32535.9	9458.03			40		M600T26	y
336	2	(6-Bromohexyl)(octyl)boranyl	2.87101	-1.52156	-3.11894	0.0853198	0.084661	DOWN	288.163	288.162	288.163	20.594	20.487	20.8725	58296	1.68544e+06	604523	587054	81336.4			37		M288T21	y
337	0	Cycloserine tartrate	1.84041	-0.880029	-2.33515	0.0854166	0.0847092	DOWN	253.067	253.065	253.068	4.25642	4.19533	4.3175	10062.6	960846	261646	522082	193535			25		M253T4_3	y
338	5	Arborescin	34.9651	5.12784	3.15955	0.0855083	0.0847548	UP	249.147	249.147	249.147	26.7153	26.7	26.7307	3630.72	6384.29	11057.9	233286	123894			18		M249T27	y
339	2	N-(Phenylacetyl)isoleucine	1.44428	-0.530352	-2.77548	0.0860572	0.0850267	DOWN	250.143	250.143	250.144	10.8215	10.784	10.859	7693.23	151899	27548.9	105172	9557.53			29		M250T11_1	y
340	7	Tris(5-tert-butyl-4-hydroxy-o-tolyl)butane	1.59096	-0.669897	-2.31658	0.0862672	0.0851302	DOWN	545.403	545.402	545.403	23.3675	23.2818	23.4868	16574.2	485265	107422	305014	81383.7			4		M545T23	y
341	-	Unknown	2.33276	-1.22204	-2.9003	0.0864119	0.0852014	DOWN	523.601	523.601	523.601	30.6894	30.6345	30.7443	29334.1	1.68495e+06	555116	722301	149496	[52][M+1]+		36		M524T31_2	n
342	2	3-(Dibromoacetyl)phenyl benzoate	190.464	7.57337	3.16745	0.0868808	0.0854314	UP	396.906	396.906	396.906	23.6456	23.5892	23.702	967.766	0	0	82190.2	44943.9			49		M397T24	y
343	-	Unknown	2.15443	1.1073	2.87493	0.0872541	0.0856136	UP	577.535	577.534	577.535	30.6223	30.612	30.6325	3132.21	178323	32969	384184	119562			36		M578T31	n
344	-	Unknown	107.913	6.75372	3.1036	0.0898793	0.0873246	UP	224.936	224.936	224.936	5.81325	5.7915	5.835	3081.14	1734.34	3003.97	218202	120768			42		M225T6_1	y
345	4	Cyclohexylaminoacetonitrile	1.51179	-0.596254	-2.74301	0.0900958	0.0874642	DOWN	139.122	139.122	139.123	25.9083	25.8975	25.9192	701.712	127582	25915.6	84391.5	8494.51			58		M139T26	y
346	1	1-Dodecanamine acetate	91.5006	6.51571	3.09797	0.0901965	0.0875291	UP	246.243	246.243	246.243	14.7601	14.744	14.7762	2279.9	1972.71	2330.09	193665	107148			5		M246T15	y
347	1	Sodium oxalate	43.7493	5.45119	3.07231	0.0914946	0.0883608	UP	134.966	134.966	134.966	15.5111	15.488	15.5342	7257.59	30383.2	16967.8	1.32924e+06	732052			27		M135T16	y
348	5	N2-Galacturonyl-L-lysine	498.533	8.96155	3.06393	0.092045	0.0887111	UP	323.146	323.146	323.147	11.7367	11.735	11.7378	12418.4	1443.69	2500.55	863150	487119			2		M323T12	y
349	1	3-Dibenzofuranamine	2.56579	1.3594	2.20319	0.0923486	0.0889037	UP	184.076	184.074	184.076	31.3998	31.3887	31.5762	11755.3	442461	389029	1.13563e+06	381593			35		M184T31	y
350	2	Guanidine, 1-tert-butyl-2-cyano-3-(1-eth	1619.29	10.6611	3.03087	0.0937946	0.0898151	UP	249.183	249.183	249.183	15.5111	15.488	15.5342	12495	0	0	698766	399323			27		M249T16	y
351	-	Unknown	2.30737	-1.20625	-2.27254	0.0957303	0.09102	DOWN	573.505	573.505	573.506	25.8858	25.874	25.8975	510.552	47543	17129	20604.9	11319.6			40		M574T26	n
352	0	2',3-Dimethoxy-5'-(trifluoromethyl)[1,1'-biphenyl]-4-ol	2.95738	1.56432	2.96871	0.097193	0.0919193	UP	299.089	299.089	299.089	7.37767	7.29183	7.405	225496	2.09019e+06	15996.4	6.18149e+06	2.38695e+06			17		M299T7	y
353	1	Allyltriphenylsilane	1.93485	0.952222	2.62692	0.0990364	0.093039	UP	301.141	301.141	301.141	19.27	19.14	19.2745	196635	6.51671e+06	1.21694e+06	1.26089e+07	3.82807e+06			21		M301T19	y
354	1	1-Dodecanamine acetate	412.062	8.68672	2.93537	0.0991045	0.0930801	UP	246.242	246.242	246.242	29.2103	29.1437	29.277	2710.54	0	0	177816	104922			22		M246T29	y
355	0	3-Methylbenzoic acid	115.553	6.85241	2.90846	0.100657	0.0940115	UP	137.06	137.06	137.06	15.5111	15.488	15.5342	24165.1	39473.7	25518.3	4.5613e+06	2.69273e+06			27		M137T16	y
356	6	MG(0:0/18:2(9Z,12Z)/0:0)	2.08873	-1.06263	-2.55266	0.100902	0.094157	DOWN	355.282	355.282	355.283	31.3942	31.207	31.638	16268.6	2.22816e+06	743338	1.06675e+06	261661			35		M355T31	y
357	2	2-Oxocyclohexyl benzoate	1.38283	0.467623	2.16828	0.101244	0.0943603	UP	219.101	219.101	219.101	8.049	7.98733	8.12217	29450.7	1.0441e+06	255161	1.44381e+06	191944			6		M219T8	y
358	7	Calcium manganese(2+) hydroxide phosphate--carbonic acid (1/1/1/1/1)	1.69805	0.763875	2.20112	0.102559	0.0951378	UP	269.866	269.866	269.866	30.612	30.5185	30.6325	2279.17	152943	46599.3	259703	69900.6			36		M270T31	y
359	-	Unknown	8.95671	3.16297	2.7263	0.102886	0.09533	UP	123.097	123.096	123.097	23.566	23.521	23.611	749.484	2394.01	2610.45	22730.9	12653.8			49		M123T24_2	n
360	-	Unknown	2.42455	-1.27772	-2.11676	0.102981	0.095386	DOWN	556.459	556.459	556.46	31.3887	31.3605	31.5762	3024.72	464427	146870	191408	168334			35		M556T31	n
361	-	Unknown	9.34165	3.22368	2.76845	0.103042	0.0954215	UP	333.334	333.334	333.334	29.2103	29.1437	29.277	6900.87	50779.4	44171.7	475707	262156	[30][M+1]+		22		M333T29	n
362	4	Benzenesulfonic acid, 2-[[[3-[[8-[[(2-eth	3.20577	-1.68067	-2.49638	0.10492	0.0965151	DOWN	631.114	631.114	631.114	29.8669	29.8463	29.8875	10978.8	500206	224974	156033	80063.5			26		M631T30	y
363	0	Hexylamine	2.1752	1.12115	2.1055	0.105122	0.0966323	UP	102.128	102.128	102.128	28.6253	28.6242	28.6263	160044	7.94697e+06	4.93551e+06	1.72862e+07	5.88778e+06			14		M102T29	y
364	7	N-Oleoyl Glycine	923.461	9.85091	2.81057	0.106711	0.0975447	UP	340.282	340.282	340.282	26.3008	26.2375	26.364	4032.07	0	0	398498	245580			45		M340T26	y
365	3	diundecylarsinic acid	1.73771	0.797188	2.303	0.107048	0.0977374	UP	419.285	419.285	419.285	6.9945	6.942	6.99733	184728	1.55074e+06	381188	2.69475e+06	771336			23		M419T7	y
366	-	Unknown	2.5555	1.35361	2.74494	0.108108	0.0983393	UP	319.304	319.304	319.304	11.7367	11.735	11.7378	80854.6	550385	537085	1.40688e+06	60168.4	[28][M+1]+		2		M319T12	n
367	0	Ammonium pentadecanoate	3.9928	1.9974	2.34353	0.109544	0.0991477	UP	260.258	260.258	260.259	9.36783	9.34983	9.388	34696.1	257712	227305	1.02957e+06	523217			16		M260T9	y
368	1	tert-Butyl 4-[(2-oxohexadecanoyl)amino]butanoate	9.17646	3.19794	2.59481	0.111657	0.100322	UP	412.342	412.342	412.343	30.5755	30.5185	30.6325	5442.67	54570.1	62482.6	502080	292108			36		M412T31	y
369	10	PE(O-16:0/18:1(9Z))	2.44735	-1.29122	-2.52331	0.112194	0.100618	DOWN	704.552	704.552	704.552	28.835	28.7987	28.8713	1494.35	106947	41943.3	43699.2	11207			14		M705T29	y
370	0	1,1,1-Trifluorododec-11-en-2-one	2.36893	1.24424	2.29405	0.113464	0.101313	UP	237.146	237.146	237.146	11.2184	11.1518	11.285	14618.7	296745	123975	702969	280535			1		M237T11	y
371	0	1-Dodecanamine acetate	4.32496	2.11269	2.55625	0.114395	0.101819	UP	246.243	246.243	246.243	9.36783	9.34983	9.388	242195	1.64412e+06	784422	7.11077e+06	3.62005e+06			16		M246T9	y
372	-	Unknown	2.89499	-1.53356	-2.1454	0.114577	0.101918	DOWN	575.52	575.518	575.523	25.8858	25.874	25.8975	445.364	42009.6	19129.6	14511.1	11265.8			40		M576T26	n
373	8	N-Oleoyl-L-Serine	3.35554	1.74655	2.06449	0.114793	0.102035	UP	370.298	370.298	370.299	29.2103	29.1437	29.277	1205.74	31984.6	37001.5	107325	51247.2			22		M370T29	y
374	4	2,3-Difluorophenylboronic acid	2.56318	1.35793	2.54396	0.115433	0.102379	UP	159.042	159.042	159.042	4.32692	4.32383	4.33	17764.4	524416	117825	1.34417e+06	545551			25		M159T4	y
375	-	Unknown	2.12393	-1.08673	-2.37942	0.115602	0.10247	DOWN	651.547	651.545	651.549	28.7125	28.6263	28.7987	1719.37	163528	59447.9	76993.4	20829.5			14		M652T29	n
376	3	2,2'-Methylenebis(4,6-dicyclopentyl-m-cresol)	1.48037	-0.565959	-2.4159	0.115646	0.102494	DOWN	501.374	501.374	501.374	30.5843	30.534	30.6345	4721.97	523740	116035	353790	37173.3			36		M501T31_1	y
377	0	Dihydromethysticin	2.38297	1.25276	2.65616	0.11634	0.102866	UP	277.107	277.107	277.107	7.37767	7.29183	7.405	168380	1.93412e+06	110723	4.60895e+06	1.74071e+06			17		M277T7	y
378	-	Unknown	4.27061	2.09444	2.50965	0.116419	0.102908	UP	614.182	614.182	614.182	29.8669	29.8463	29.8875	10938	146469	75756.6	625515	321820	[56][M+4]+		26		M614T30	n
379	-	Unknown	4.61259	2.20558	2.63117	0.116685	0.10305	UP	613.183	613.183	613.183	29.8669	29.8463	29.8875	26960.6	321345	77532.3	1.48223e+06	760248	[56][M+3]+		26		M613T30	n
380	4	4-chloropteridine	89.954	6.49112	2.65712	0.117209	0.103329	UP	167.013	167.012	167.013	23.6456	23.5892	23.702	2317.22	1804.18	1271.89	162293	104607			49		M167T24	y
381	0	Nonadecan-10-amine	9.07903	3.18254	2.59868	0.118759	0.104148	UP	284.331	284.331	284.331	29.34	29.277	29.403	3383.1	26077.4	15326.1	236758	139582			22		M284T29	y
382	7	Methoprene	1.56937	0.65019	2.17694	0.118874	0.104209	UP	311.256	311.256	311.256	21.853	21.8365	21.9813	5017.82	335338	68576.4	526270	135553			43		M311T22	y
383	-	Unknown	385.674	8.59124	2.62904	0.11933	0.104448	UP	759.223	759.222	759.223	29.34	29.277	29.403	4401.46	0	0	166429	109646			22		M759T29	y
384	0	D-erythro-Sphingosine (Sphingosine)	2.15754	1.10939	2.06644	0.120666	0.105145	UP	286.274	286.274	286.274	12.2397	12.198	12.2897	56752.4	678142	350374	1.46312e+06	556902			31		M286T12	y
385	7	Cys Asp Asp Trp	9.6433	3.26953	2.54632	0.12086	0.105245	UP	538.164	538.164	538.164	23.6456	23.5892	23.702	834.48	6282.51	5269.18	60584.1	36559.1			49		M538T24	y
386	5	1,2-Difluoro-3-(hexyloxy)benzene	1.95262	0.965414	2.00139	0.12094	0.105287	UP	215.125	215.125	215.125	28.6263	28.6242	28.678	7913.86	538826	268952	1.05213e+06	353549			14		M215T29_1	y
387	1	2-(Nonylsulfanyl)-1,3-benzothiazole	3.06346	1.61516	2.42475	0.121799	0.105731	UP	294.134	294.134	294.134	7.39133	7.37767	7.405	11097	104984	38175.4	321615	149961			17		M294T7	y
388	-	Unknown	2.22715	-1.1552	-2.59217	0.122102	0.105886	DOWN	575.413	575.413	575.419	23.5508	23.372	23.6757	3319.22	320105	117841	143729	1614.45			49		M575T24	n
389	1	Phytosphingosine	2.40675	1.26708	2.53357	0.12303	0.106362	UP	318.301	318.3	318.301	11.7367	11.735	11.7378	424284	3.01972e+06	2.88162e+06	7.26805e+06	362518	[28][M]+		2		M318T12	y
390	-	Unknown	2.21129	-1.14489	-2.04677	0.123767	0.106738	DOWN	644.492	644.491	644.494	31.3605	31.289	31.3887	1550.15	190325	46611.4	85925.8	75050			35		M644T31	n
391	0	1,1'-Sulfinyldinaphthalene	2.6285	1.39424	2.26677	0.124351	0.107034	UP	303.084	303.084	303.084	5.41675	5.405	5.4285	3612.21	92206.6	39754.6	242365	107630			9		M303T5	y
392	8	2,2-Dichloro-1,1,1-trifluoroethane	191.191	7.57887	2.54251	0.126082	0.107989	UP	152.947	152.947	152.947	14.5245	14.52	14.529	2448.45	2442.25	2177.55	494439	335159			34		M153T15	y
393	8	Subcordatolide E	10.221	3.35347	2.43909	0.126645	0.108298	UP	319.188	319.188	319.188	15.1661	15.14	15.1922	27403.2	86458.6	104752	885167	557424			27		M319T15	y
394	-	Unknown	2.97096	-1.57093	-2.48808	0.12987	0.110048	DOWN	550.628	550.627	550.628	23.3979	23.309	23.4868	4660.5	303492	139947	102153	7733.92	[55][M]+		4		M551T23	n
395	-	Unknown	3.41266	1.7709	2.35697	0.130162	0.110204	UP	137.024	137.024	137.024	31.4647	31.3998	31.5762	3742.37	133930	231973	458038	54002.7	[2][M+1]+		35		M137T31	n
396	2	Guanidine, 1-(4,6-dimethyl-2-pyrimidiny	1.48265	-0.568179	-2.03945	0.130195	0.110222	DOWN	260.131	260.131	260.131	24.1728	24.1518	24.1938	3399.59	363817	87844.5	245383	48992.1			54		M260T24	y
397	-	Unknown	4.20752	-2.07297	-2.41165	0.130974	0.110639	DOWN	677.569	677.569	677.569	28.6253	28.6242	28.6263	12426.4	999313	539915	237506	88567.4	[61][M]+		14		M678T29_1	y
398	0	Monoethanolamine laurate	17.8227	4.15564	2.46722	0.131565	0.110954	UP	262.238	262.238	262.238	9.634	9.61567	9.653	12068.2	31038.6	21528.1	553190	365930			19		M262T10	y
399	-	Unknown	1.95187	0.964855	2.44402	0.133303	0.111875	UP	594.598	594.598	594.599	26.2523	26.2375	26.267	746.253	15483.7	712.678	30222.1	10420.6			45		M595T26	n
400	1	Monoethanolamine laurate	3.82144	1.93412	2.31636	0.133586	0.112024	UP	262.238	262.238	262.238	6.98275	6.942	6.99733	56410.4	151663	74115.4	579571	311265			23		M262T7	y
401	10	Lophocerine	15590.4	13.9284	2.44625	0.134261	0.112379	UP	250.178	250.178	250.178	18.6615	18.578	18.745	41812.1	0	0	6.72766e+06	4.76347e+06	[16][M]+		30		M250T19	y
402	6	Dodecanoic acid, 1-oxo-2-(2,4,6-trimethylphenyl)-1H-inden-3-yl ester	2.89572	1.53392	2.24699	0.134934	0.112731	UP	447.287	447.287	447.287	29.1243	29.105	29.1437	3741.49	72604.8	29868.3	210243	101805			22		M447T29	y
403	2	Carbamothioic acid, (2-nitronaphtho(2,1	1.54534	0.627927	2.04953	0.135612	0.113085	UP	317.059	317.058	317.059	6.43	6.4015	6.5475	12078.3	297230	60357.6	459322	122970			24		M317T6	y
404	7	L-Ornithine alpha-ketoisocaproate	2.07365	1.05217	2.23734	0.135975	0.113273	UP	263.162	263.162	263.162	12.942	12.8927	12.945	56470.8	836042	666819	1.73365e+06	195519	[18][M]+		39		M263T13	y
405	2	Dihexadecyl peroxodicarbonate	1.86939	-0.902569	-1.96	0.137094	0.113924	DOWN	571.492	571.477	571.495	28.678	28.6263	28.8713	2171.53	228741	80604	122361	48377.9			14		M571T29	y
406	-	Unknown	37.5315	5.23003	2.38016	0.139854	0.115546	UP	641.837	641.837	641.837	23.6456	23.5892	23.702	569.327	548.886	950.698	31397.7	22428.7			49		M642T24	y
407	0	PG(14:0/16:0)	5.16334	2.3683	2.10842	0.139944	0.115599	UP	695.486	695.486	695.486	29.2103	29.1437	29.277	6537.79	64867	80060.9	334930	206905	[63][M]+		22		M695T29	y
408	-	Unknown	1.98764	-0.991054	-2.04596	0.143521	0.117673	DOWN	542.444	542.444	542.445	31.6082	31.5762	31.6402	3226.39	283195	109692	142478	46461.9			15		M542T32	y
409	0	Dodecanoic acid, ammonium salt	40.8306	5.35158	2.3409	0.143946	0.117918	UP	218.211	218.211	218.212	19.2745	19.27	19.289	2271.42	8339.81	5482.33	340520	245721			21		M218T19	y
410	0	Propiophenone, 3'-(trifluoromethyl)	1.85516	0.891545	1.95358	0.145031	0.11854	UP	203.068	203.068	203.068	6.48875	6.43	6.5475	42488.1	692417	243970	1.28454e+06	464851			24		M203T6	y
411	7	Cerium--rhodium (3/2)	1.5296	-0.613156	-1.88626	0.145221	0.118648	DOWN	626.539	626.538	626.54	28.835	28.7987	28.8713	1327.05	42774.4	11487	27964.4	7279.3			14		M627T29_1	y
412	1	Guanidine, ((2,6-pyridylidene)dimethyle	1.33173	-0.413302	-1.90821	0.147202	0.119776	DOWN	222.146	222.146	222.147	8.049	7.98733	8.12217	77395.7	2.59183e+06	290569	1.94621e+06	508905			6		M222T8	y
413	3	2-Bromo-4-methoxy-1,3-benzothiazole	2.37318	1.24682	1.83695	0.148242	0.120364	UP	243.942	243.941	243.943	28.6253	28.6242	28.6263	20415.2	834635	884018	1.98074e+06	621554			14		M244T29	y
414	5	DG(18:1(9Z)/18:2(9Z,12Z)/0:0)[iso2]	1.78489	0.835832	1.82406	0.14862	0.120577	UP	619.527	619.526	619.527	31.3034	31.207	31.3998	7050.95	233243	140149	416312	102844			35		M620T31	y
415	5	Bromo[di(methanesulfonyl)]methane	1.94478	0.95961	2.18904	0.151811	0.122364	UP	250.903	250.903	250.903	30.7443	30.612	30.944	3313.12	138289	101643	268941	18858.8			36		M251T31	y
416	-	Unknown	2.15671	1.10883	2.24498	0.152709	0.122863	UP	339.345	339.345	339.345	30.2731	30.2083	30.3378	51488	496313	441888	1.0704e+06	30268.3	[31][M+1]+		20		M339T30	n
417	4	Diethyl L-seryl-L-glutamate	3.50916	1.81112	1.83233	0.153302	0.123191	UP	291.156	291.156	291.156	12.2647	12.2397	12.2897	18736.7	154561	197586	542380	308790			31		M291T12	y
418	2	4-n-dodecyloxyaniline	3.26186	1.70569	1.87679	0.155039	0.124148	UP	278.248	278.248	278.249	20.1543	20.1218	20.1868	2521.79	49479.1	49214.6	161863	91297.1			3		M278T20	y
419	2	2-[(Octadecanoylcarbamothioyl)amino]benzoic acid	2.84779	1.50984	1.90019	0.157499	0.125492	UP	463.298	463.298	463.298	15.1661	15.14	15.1922	13771.3	177627	129633	505844	269631			27		M463T15	y
420	8	1,1'-Tellanylbis(pentafluorobenzene)	173.059	7.43512	2.20512	0.158238	0.125893	UP	464.894	464.894	464.894	23.6456	23.5892	23.702	1071.54	0	0	74679.6	58658.4			49		M465T24	y
421	1	Laurixamine	1.62979	0.704683	1.91728	0.161318	0.127551	UP	244.263	244.263	244.263	11.9297	11.9212	11.9382	23245.7	302870	67242.6	493613	158654			11		M244T12	y
422	-	Unknown	1.22584	0.293775	1.72749	0.164065	0.129014	UP	261.262	261.261	261.262	30.5843	30.534	30.6345	4155.37	361392	49691.6	443009	65018.6			36		M261T31	n
423	-	Unknown	3.81753	1.93264	1.95573	0.16413	0.129049	UP	696.49	696.489	696.49	29.2103	29.1437	29.277	3064.48	40994.8	33916.9	156499	96507.5	[63][M+1]+		22		M696T29	n
424	2	Guanidine, 1-(4,6-dimethyl-2-pyrimidiny	2.27429	-1.18542	-2.08779	0.164549	0.12927	DOWN	260.13	260.13	260.13	30.6335	30.5185	30.7443	4915.57	712071	325958	313096	57515			36		M260T31	y
425	8	Alexidine	2.67274	1.41832	2.01039	0.165442	0.129741	UP	509.472	509.472	509.473	30.5652	30.5185	30.612	5590.37	150975	57193.9	403516	209925			36		M509T31	y
426	0	Difluorotriphenylphosphorane	2.42107	1.27565	1.93165	0.167099	0.130611	UP	301.095	301.095	301.096	7.39133	7.37767	7.405	5177.25	95243.3	40685.7	230591	114339			17		M301T7	y
427	-	Unknown	1.9039	-0.92896	-1.87745	0.168869	0.131533	DOWN	547.491	547.491	547.491	25.8858	25.874	25.8975	530.106	45663.5	18499.9	23984.2	7600.64			40		M547T26	y
428	-	Unknown	1.32547	-0.406506	-1.86533	0.170464	0.132359	DOWN	573.505	573.503	573.509	31.3887	31.207	31.5762	5455.63	861725	181572	650127	75070.6			35		M574T31	n
429	0	2-bromo-2,2-difluoro-N-(2-hydroxyphen	63.6853	5.99289	2.09607	0.170837	0.132552	UP	265.962	265.962	265.963	23.6565	23.611	23.702	1724.85	1461.77	2531.86	111415	90822.4			49		M266T24	y
430	-	Unknown	3.393	1.76256	1.66722	0.170944	0.132607	UP	578.539	578.538	578.54	31.3444	31.289	31.3998	1712.04	48718.1	84382.3	166277	88291.9			35		M579T31	n
431	1	Benzyl thiocyanate	2.00569	1.0041	1.8875	0.172491	0.133402	UP	150.037	150.037	150.037	31.3998	31.3605	31.5762	23838.5	1.45518e+06	1.26122e+06	2.91893e+06	462069			35		M150T31	y
432	1	N-Methyl-N-octyldodecan-1-amine	2.4832	-1.3122	-2.04959	0.173892	0.134117	DOWN	312.362	312.362	312.362	28.9578	28.8713	29.0443	5143.63	291628	146316	117440	16114.4			57		M312T29	y
433	5	1-Oleoyl-2-acetyl-sn-glycerol	1.79867	-0.846934	-2.06306	0.174139	0.134243	DOWN	399.308	399.308	399.308	28.6318	28.6242	28.6393	8602.47	1.11412e+06	414476	619409	26663.6			14		M399T29	y
434	6	Benzyl octyl adipate	1.91285	-0.935723	-2.02176	0.174255	0.134302	DOWN	349.235	349.235	349.235	25.8858	25.874	25.8975	23765.4	2.29627e+06	926857	1.20045e+06	149263			40		M349T26	y
435	1	Sulfuric acid--3-methylbutan-1-ol (1/2)	1.87226	0.904778	1.785	0.175456	0.134911	UP	275.152	275.152	275.152	29.5211	29.5012	29.541	4447.45	186240	69030.1	348689	141711			7		M275T30	y
436	2	Glycerol triundecanoate	1.6398	0.713522	1.66596	0.17882	0.136603	UP	597.51	597.51	597.511	30.3378	30.2083	30.534	9203.49	245790	133386	403047	94545.7			20		M598T30	y
437	1	Allyltriphenylsilane	2.39493	1.25998	1.85686	0.180239	0.13731	UP	301.141	301.141	301.141	25.7036	25.6897	25.7175	4061.38	238581	100147	571384	293836			40		M301T26	y
438	0	D-erythro-Sphingosine (Sphingosine)	2.97216	1.57151	1.87233	0.180894	0.137635	UP	286.274	286.274	286.274	29.403	29.277	29.5717	30075.2	1.11283e+06	607861	3.30751e+06	1.93712e+06			22		M286T29_2	y
439	2	4-Ethyl-1,2,3,4-tetrahydroisoquinoline	1.37072	0.454935	1.6576	0.18273	0.138542	UP	162.127	162.125	162.128	28.678	28.6393	28.8428	4538.98	444117	142705	608761	96086.4			14		M162T29	y
440	-	Unknown	124.709	6.96243	1.99996	0.183509	0.138925	UP	549.874	549.874	549.874	29.5211	29.5012	29.541	2505.24	0	0	53671.6	46482			7		M550T30	n
441	3	1-Dodecanaminium, N,N,N-tripropyl-, bromide	202.953	7.665	1.9972	0.183884	0.139109	UP	392.287	392.287	392.287	29.5211	29.5012	29.541	7812	0	0	87435.8	75827.6			7		M392T30	y
442	-	Unknown	298.196	-8.22012	-1.97873	0.186428	0.14035	DOWN	934.879	934.879	934.88	30.5843	30.534	30.6345	1482.02	128536	112512	0	0			36		M935T31	n
443	6	2,3-Diaceto-1-stearin	1.97537	-0.982124	-1.73626	0.186618	0.140442	DOWN	443.334	443.333	443.335	28.6263	28.6242	28.678	8452.27	982079	438792	497161	203639			14		M443T29	y
444	10	Arachidonoylmorpholine	1.33061	-0.412092	-1.88647	0.18919	0.141682	DOWN	374.302	374.3	374.305	22.5925	22.465	22.6768	6167.01	264540	12589.1	198811	59021.6			41		M374T23	y
445	0	13-Docosenamide	1.92598	0.945594	1.92893	0.190007	0.142074	UP	338.342	338.342	338.342	30.2731	30.2083	30.3378	204224	2.25628e+06	1.86286e+06	4.34556e+06	221893	[31][M]+		20		M338T30	y
446	2	Glyoxal semicarbosazone	2.41789	1.27375	1.81502	0.190113	0.142125	UP	173.079	173.078	173.079	0.525167	0.525	0.529	32263.2	728737	295226	1.76201e+06	940803			32		M173T1	y
447	0	Benzene, 1-[3-(2-propenyloxy)-1-propyn	1.48627	-0.571697	-1.61061	0.190186	0.14216	DOWN	241.083	241.083	241.084	8.049	7.98733	8.12217	72088.7	2.42745e+06	696301	1.63325e+06	494591			6		M241T8	y
448	7	Stearoyl lactic acid	1.50236	-0.587234	-1.90241	0.190714	0.142412	DOWN	429.318	429.318	429.318	31.4322	31.3998	31.4647	7720.94	780588	39116.6	519573	234400	[43][M]+		35		M429T31	y
449	-	Unknown	12.2729	3.61741	1.90705	0.191658	0.142862	UP	722.616	722.611	722.621	29.5211	29.5012	29.541	695.809	1698.39	2941.7	24375	20384.5			7		M723T30	n
450	-	Unknown	1.95166	0.964702	1.81248	0.191705	0.142885	UP	632.582	632.581	632.582	31.4322	31.3998	31.4647	1741.64	80978.7	21378.9	158043	70473.1			35		M633T31	n
451	-	Unknown	2.33667	1.22445	1.74882	0.194661	0.144283	UP	361.365	361.364	361.365	23.2327	23.1623	23.303	1432.61	57644.3	71798.7	135032	26822.2	[35][M+1]+		4		M361T23	n
452	-	Unknown	2.85324	1.5126	1.74067	0.195607	0.144727	UP	589.436	589.43	589.437	31.3998	31.207	31.5762	2196.28	106832	185038	305637	69956.9			35		M589T31	n
453	-	Unknown	172.262	-7.42846	-1.90969	0.196369	0.145084	DOWN	934.879	934.879	934.879	28.6318	28.6242	28.6393	1071.29	74191.9	67290.8	0	0			14		M935T29	n
454	8	Trifluoro(methyltellanyl)methane	20.71	4.37226	1.89379	0.196815	0.145292	UP	214.93	214.93	214.931	19.205	19.14	19.27	943.873	4452.41	7277.11	95188.6	82667			21		M215T19_1	y
455	6	N-Oleoyl Glycine	1096.72	10.099	1.89062	0.199238	0.146417	UP	340.282	340.282	340.283	23.504	23.487	23.521	4372.15	0	0	473263	433569			4		M340T24	y
456	7	Hexadecanamide, N-((1R,2R)-2-hydroxy-1-(4-morpholinylmethyl)-2-phenylethyl)-	2.17798	-1.12299	-1.8545	0.200107	0.146819	DOWN	475.393	475.392	475.393	28.835	28.7987	28.8713	2134.51	178361	89242.5	81892.7	12391.3			14		M475T29	y
457	5	N,N-Tetramethylcystamine	1.39486	0.480122	1.62091	0.201072	0.147263	UP	209.115	209.115	209.115	8.049	7.98733	8.12217	12933	426761	158302	595273	85815.4			6		M209T8	y
458	1	3-Ethyluridine	3.1432	1.65224	1.76659	0.201788	0.147591	UP	273.108	273.107	273.108	9.26075	9.23967	9.28183	6971.14	120176	68698.4	377739	243002			56		M273T9	y
459	0	Silane, trimethyl(1-naphthalenylmethyl)-	2.92669	1.54927	1.85781	0.204063	0.148629	UP	215.125	215.125	215.126	29.277	29.1437	29.338	9093.4	339584	18999.7	993857	609688			22		M215T29_2	y
460	0	C16 Sphinganine	2146.72	11.0679	1.85641	0.204528	0.14884	UP	274.274	274.274	274.274	30.2731	30.2083	30.3378	15779.6	0	0	926226	864180			20		M274T30	y
461	-	Unknown	3.12251	1.6427	1.70175	0.205639	0.149342	UP	673.448	673.448	673.449	28.0475	28.0383	28.0567	6675.13	72299.7	52028.8	225756	147269			55		M673T28	y
462	2	Metkephamid acetate ester	284.05	8.15	1.8406	0.207037	0.149972	UP	643.292	643.292	643.292	29.8669	29.8463	29.8875	2613.13	0	0	122431	115211			26		M643T30	y
463	0	Anthracene, 9-[(1,1-dimethylethyl)thio]-	7.31535	2.87093	1.78312	0.207549	0.150202	UP	267.12	267.12	267.12	7.59033	7.54633	7.636	17074.9	101213	118769	740409	609422			17		M267T8	y
464	5	(L)-Ornithine 2-oxoglutarate	1.66675	0.737039	1.63714	0.207632	0.150239	UP	279.12	279.12	279.12	6.1365	6.06917	6.20383	13191.8	239374	68911.5	398977	154154			33		M279T6	y
465	-	Unknown	2.15483	-1.10757	-1.81852	0.208832	0.150776	DOWN	649.538	649.538	649.54	25.874	25.7175	25.8975	1975.4	149583	76083.2	69417.7	6421.34			40		M650T26	y
466	3	4-Nitroprocainamide	38.9908	5.28506	1.8233	0.209409	0.151033	UP	266.151	266.151	266.151	29.8669	29.8463	29.8875	1846.14	1644.01	2847.51	75174.5	69792.6			26		M266T30	y
467	3	3-Methylpyridine-2,6-diamine	2.86356	1.51781	1.51658	0.210832	0.151665	UP	124.087	124.086	124.087	31.3998	31.289	31.5762	3246.75	120903	209409	347036	151153			35		M124T31_2	y
468	2	Guanidine, 1-(4,6-dimethyl-2-pyrimidiny	2.31129	-1.2087	-1.74821	0.211015	0.151746	DOWN	260.131	260.131	260.131	18.7316	18.578	18.7505	23799.8	778787	427192	336949	95583.3			30		M260T19_1	y
469	0	5-{[3-(3-Chloro-4-ethoxyphenyl)-1-phenyl-1H-pyrazol-4-yl]methylidene}-2-[4-(pentyloxy)phenyl][1,3]thiazolo[3,2-b][1,2,4]triazol-6(5H)-one	2.57252	1.36318	1.78634	0.214233	0.153335	UP	612.183	612.183	612.183	28.6328	28.6263	28.6393	69546.9	1.72683e+06	218662	4.44229e+06	2.62384e+06			14		M612T29	y
470	5	9-(Acetyloxy)octadec-12-enoic acid	1.21531	-0.281324	-1.50499	0.214322	0.153379	DOWN	341.267	341.267	341.268	20.4942	20.487	20.594	21744.1	767925	90576.3	631876	127717			37		M341T20	y
471	-	Unknown	1.61123	-0.688161	-1.54161	0.219505	0.155907	DOWN	667.607	667.606	667.607	28.8963	28.8713	28.9213	4579.55	278372	104784	172770	55655.8	[59][M+1]+		14		M668T29	n
472	-	Unknown	5.04073	2.33363	1.74687	0.220849	0.156556	UP	317.324	317.324	317.324	29.3705	29.277	29.5163	12134.7	188044	66225.5	947880	750474			22		M317T29	n
473	3	2-methyl-4,6-bis(tribromomethyl)-1,3,5	19.9637	4.3193	1.7344	0.223201	0.157686	UP	591.552	591.551	591.552	29.7892	29.6908	29.8875	2633.79	3674.65	6364.68	78958.9	74912.4			26		M592T30	y
474	-	Unknown	1.28686	0.363857	1.44441	0.223778	0.157962	UP	787.634	787.627	787.64	31.3034	31.207	31.3998	1719.49	141414	36974.6	181980	31609.8			35		M788T31	y
475	6	Benzyloctyl adipate	2.30286	-1.20343	-1.64394	0.22607	0.159054	DOWN	349.235	349.235	349.235	28.835	28.7987	28.8713	28241.2	2.73399e+06	1.57357e+06	1.18721e+06	423970			14		M349T29	y
476	-	Unknown	14.32	3.83996	1.70392	0.227788	0.159868	UP	578.543	578.541	578.544	29.7028	29.6908	29.7148	1358.11	1366.15	2366.24	23539.1	22414.4			26		M579T30	n
477	7	26,27-bisnor-22-dehydro-cholesterol	7.17626	2.84323	1.63175	0.229093	0.160484	UP	357.318	357.317	357.318	29.7028	29.6908	29.7148	2319.77	8682.93	15039.3	64231.6	57013.1			26		M357T30	y
478	-	Unknown	172.976	7.43442	1.69202	0.232715	0.16218	UP	934.879	934.878	934.879	29.8757	29.785	29.9663	1379.38	0	0	74499.8	76262.2			26		M935T30	n
479	-	Unknown	1.4563	-0.542312	-1.44553	0.233101	0.16236	DOWN	666.606	666.604	666.609	28.8963	28.8713	28.9213	9260.29	515838	162514	354210	105334	[59][M]+		14		M667T29_1	y
480	-	Unknown	2.65436	1.40836	1.49914	0.234653	0.16308	UP	558.478	558.477	558.478	31.3034	31.207	31.3998	2755.12	93217.6	161458	248196	77412.7			35		M558T31	n
481	-	Unknown	2.64127	1.40123	1.49847	0.235479	0.163463	UP	720.606	720.606	720.606	31.7267	31.638	31.8155	1301.44	46280.9	80160.9	123000	37921.8			15		M721T32	n
482	-	Unknown	1.83159	-0.873096	-1.49225	0.236208	0.1638	DOWN	519.46	519.46	519.461	25.8858	25.874	25.8975	590.35	49835.7	23672.6	27209	11372.9			40		M519T26	n
483	4	Chamuvaritin	1.61656	0.692928	1.55432	0.240313	0.165683	UP	453.168	453.168	453.168	14.7601	14.744	14.7762	757384	1.06584e+07	2.18177e+06	1.723e+07	6.99044e+06			5		M453T15	y
484	-	Unknown	2.00909	-1.00654	-1.52061	0.240647	0.165835	DOWN	640.588	640.587	640.588	28.6318	28.6242	28.6393	32309.3	1.72441e+06	922828	858307	348776			14		M641T29_2	n
485	0	1-Dodecanamine, N-dodecyl-N-methyl-	3.67351	-1.87716	-1.56656	0.241847	0.16638	DOWN	368.425	368.425	368.425	23.1732	23.1623	23.1842	10645.9	168585	130890	45892.2	35636.1			4		M368T23	y
486	3	2,2'-[1,4-Phenylenebis(carbonylazanediyl)]didodecanoic acid	1.21069	-0.275826	-1.53808	0.243476	0.167118	DOWN	561.392	561.39	561.393	25.8858	25.874	25.8975	1831.36	151760	28356	125351	8967.96			40		M561T26	y
487	4	Cyclononyl trifluoroacetate	22.3924	4.48494	1.63325	0.243877	0.1673	UP	239.124	239.124	239.125	9.62717	9.60133	9.653	18200.5	26931.9	14726.9	603070	610812			19		M239T10	y
488	1	Hexadecyl(dimethyl)amine oxide	5.73218	2.51908	1.59769	0.244275	0.167479	UP	286.31	286.309	286.311	32.2007	32.1175	32.2838	31951.5	332795	290938	1.90832e+06	1.68307e+06			8		M286T32	y
489	8	Pentadecanophenone	5.06505	2.34058	1.49673	0.245102	0.167852	UP	303.271	303.271	303.271	31.3768	31.289	31.4647	1209.11	18389.4	31851.4	94456.7	82062.2			35		M303T31_2	y
490	3	1,1,1-Trifluorododec-3-yn-2-one	132.251	7.04713	1.59288	0.252198	0.171013	UP	235.131	235.131	235.131	29.9269	29.8875	29.9663	1331.53	0	0	56925.9	61899.3			26		M235T30	y
491	5	Leucine--ornithine (1/1)	1.79194	0.84152	1.47826	0.252693	0.171231	UP	264.193	264.193	264.193	12.9435	12.942	12.945	24921.1	471011	411303	844022	147793			39		M264T13_2	y
492	-	Unknown	1.7686	-0.822608	-1.38445	0.255536	0.172479	DOWN	505.444	505.443	505.444	25.8858	25.874	25.8975	835.236	63075.5	29797.9	35664	16974.8			40		M505T26	n
493	6	L-alpha-Glutamyl-L-allothreonine	1.49824	0.583265	1.38234	0.257343	0.173267	UP	249.11	249.11	249.11	6.65425	6.6305	6.678	23268.5	522761	158484	783219	285285			47		M249T7	y
494	-	Unknown	1.57563	-0.655929	-1.45753	0.258319	0.173691	DOWN	529.442	529.442	529.443	31.3942	31.3605	31.5762	6877.93	944825	386664	599649	136917	[53][M]+		35		M529T31	n
495	2	Leupeptin	1.58199	-0.661744	-1.52837	0.260471	0.174621	DOWN	427.303	427.303	427.304	30.6894	30.6345	30.7443	2711.54	258726	106591	163544	16535.2			36		M427T31	y
496	1	9-((2-Aminoethoxy)methyl)guanine	2.64521	1.40338	1.54831	0.261548	0.175085	UP	225.11	225.109	225.11	10.183	10.1823	10.1837	18376.4	144132	5286.86	381260	265216			13		M225T10	y
497	5	Ile Lys Lys Val	1.81579	-0.860601	-1.36599	0.264971	0.17655	DOWN	487.362	487.361	487.364	29.403	29.277	29.5163	7777.89	460715	232717	253727	121353			22		M487T29	y
498	-	Unknown	4.90346	2.2938	1.48866	0.265542	0.176793	UP	579.552	579.552	579.553	29.7806	29.7148	29.8463	2142.98	10814.2	9920.64	52883.1	47931.2			26		M580T30	y
499	-	Unknown	1.58245	-0.662163	-1.32846	0.266646	0.177262	DOWN	583.488	583.487	583.491	28.7987	28.6255	28.8713	1742.7	152994	62061.7	96681.7	39228.8			14		M583T29_2	y
500	1	4-Phenylpyridine	1.43117	0.5172	1.39087	0.269048	0.178277	UP	156.081	156.081	156.081	31.3746	31.207	31.5762	25383.8	2.39232e+06	490804	3.42382e+06	1.18707e+06			35		M156T31	y
501	5	Methyl 6-O-tritylhexopyranoside	1.51061	0.595131	1.41106	0.270241	0.178779	UP	437.194	437.194	437.194	14.7601	14.744	14.7762	1.06484e+06	1.52388e+07	3.17553e+06	2.30199e+07	9.00776e+06			5		M437T15	y
502	1	C17 Sphinganine	3.38455	1.75896	1.48026	0.272631	0.179779	UP	288.29	288.29	288.29	29.3075	29.2537	29.403	192498	4.47808e+06	1.699e+06	1.51563e+07	1.23785e+07			22		M288T29	y
503	0	Echiguanine B	1.67558	0.744659	1.30089	0.276844	0.181526	UP	251.125	251.125	251.125	9.34983	9.20183	9.388	88295.6	999136	465550	1.67413e+06	768733			16		M251T9	y
504	2	3α-Hydroxy-6-oxo-5β-cholan-24-oic Acid	3.89924	1.96319	1.42454	0.27688	0.181541	UP	391.285	391.285	391.285	29.5211	29.5012	29.541	28937.3	68934.2	59923.1	269208	236018			7		M391T30	y
505	7	Homodolicholide	4.04168	-2.01495	-1.40792	0.280104	0.182865	DOWN	493.349	493.349	493.349	32.2007	32.1175	32.2838	2498.48	200692	179764	49547.5	47533.5			8		M493T32	y
506	0	D-erythro-Sphingosine C-15	2.08259	1.05838	1.31336	0.281837	0.183573	UP	258.243	258.243	258.244	28.6263	28.6242	28.843	2687.94	172364	219840	358963	110586			14		M258T29	y
507	4	2-{[(Cyclohexanecarbonyl)oxy]methyl}-	1.44869	-0.53475	-1.25066	0.283826	0.18438	DOWN	455.371	455.37	455.373	29.1243	29.105	29.1437	8301.62	202783	69335.3	139977	52519.2			22		M455T29	y
508	4	Cycloserine tartrate	4.2281	-2.08001	-1.41615	0.288941	0.186437	DOWN	253.066	253.066	253.066	3.6365	3.63417	3.669	82021.3	1.76081e+06	1.63174e+06	416454	202400			12		M253T4_2	y
509	8	Mercury--palladium (2/1)	1.19096	-0.25213	-1.27139	0.2901	0.186899	DOWN	510.848	510.848	510.848	29.1243	29.105	29.1437	71550.7	1.01539e+06	107391	852575	194072			22		M511T29	y
510	1	beta-Ionone	1.10845	-0.148548	-1.28802	0.292983	0.188043	DOWN	193.158	193.158	193.159	11.603	11.603	11.603	19954.2	454488	54205.6	410020	25249.7			2		M193T12	y
511	3	1-{7-[8-Methyl-5-(3-methylbutyl)nonyl]-9H-fluoren-2-yl}pentan-1-one	1.53977	-0.622711	-1.3659	0.293853	0.188386	DOWN	461.376	461.374	461.378	28.7987	28.6255	28.8713	1756.02	134285	58109.6	87211.3	13655.6			14		M461T29	y
512	-	Unknown	1.79601	0.844794	1.32378	0.294922	0.188807	UP	289.293	289.293	289.293	31.6402	31.638	31.8155	39139	2.81768e+06	2.77568e+06	5.06084e+06	953803			15		M289T32	n
513	0	Ammonium pentadecanoate	2.57942	1.36705	1.35331	0.297718	0.189902	UP	260.258	260.258	260.259	29.3075	29.2537	29.403	20707.9	642860	290839	1.65821e+06	1.26655e+06			22		M260T29	y
514	-	Unknown	2.40315	1.26493	1.25771	0.298515	0.190213	UP	546.479	546.478	546.482	31.3998	31.289	31.4647	2556.59	105574	182859	254402	92574.5	[54][M+1]+		35		M546T31	n
515	-	Unknown	4.37552	2.12945	1.37983	0.299534	0.19061	UP	619.581	619.58	619.582	29.7028	29.6908	29.7148	1066	6120.09	2486.91	26634.7	25630.9			26		M620T30	n
516	-	Unknown	1.65191	-0.724136	-1.2235	0.300264	0.190893	DOWN	564.608	564.608	564.608	30.6325	30.5185	30.6345	2119.22	189621	89961.4	114789	55940.8			36		M565T31	n
517	7	Leukotriene B4	2.43415	1.28342	1.2251	0.300814	0.191106	UP	337.235	337.235	337.235	14.3682	14.347	14.3893	60596.7	471888	496196	1.14865e+06	818087			38		M337T14_2	y
518	-	Unknown	3.3044	1.72439	1.32034	0.301272	0.191283	UP	720.606	720.605	720.606	29.7028	29.6908	29.7148	617.627	3138.77	2764.51	10703.2	9530.36			26		M721T30	n
519	3	2-Benzyl-4-methylpyridine	1.57307	-0.653583	-1.34361	0.301466	0.191358	DOWN	184.113	184.112	184.113	28.6253	28.6242	28.6263	5618.2	498104	228617	316645	49522.9			14		M184T29	y
520	-	Unknown	3.29965	-1.72231	-1.30614	0.303794	0.192255	DOWN	707.494	707.494	707.494	31.6082	31.5762	31.6402	3625.9	483728	427641	146499	130780			15		M707T32_2	y
521	-	Unknown	2.10724	-1.07536	-1.33283	0.306054	0.193122	DOWN	499.398	499.396	499.399	28.835	28.7987	28.8713	3431.15	251242	168341	119228	33058.4			14		M499T29	y
522	-	Unknown	1.69702	-0.763004	-1.31396	0.30689	0.193441	DOWN	575.516	575.51	575.519	31.3746	31.207	31.5762	7111.6	842617	110450	496383	442836			35		M576T31	y
523	5	Dihexadecyl (R(R*,R*))-tartrate	1.45912	-0.545098	-1.16933	0.308583	0.194084	DOWN	599.522	599.521	599.522	28.7987	28.6255	28.8713	2189.9	174881	61860.4	119854	53073.9			14		M600T29	y
524	-	Unknown	3.54225	1.82467	1.32236	0.309519	0.194439	UP	564.528	564.524	564.531	29.7892	29.6908	29.8875	1687.14	14535.9	8953.42	51346	47375.7			26		M565T30	n
525	1	Phytoene 1,2-epoxide	1.94013	-0.956157	-1.29504	0.312938	0.195728	DOWN	561.503	561.503	561.503	25.8858	25.874	25.8975	576.319	36680.3	23103.4	18906.1	5599.44			40		M562T26	y
526	6	1-Oleoyl-2-acetyl-sn-glycerol	2.99094	-1.5806	-1.26196	0.314092	0.19616	DOWN	399.308	399.308	399.308	31.4824	31.3887	31.5762	12479	1.40714e+06	1.21946e+06	470372	407432			35		M399T31	y
527	2	Cer(d18:0/22:1(13Z))	2.91735	1.54466	1.25929	0.314211	0.196205	UP	622.612	622.61	622.614	29.7028	29.6908	29.7148	757.002	3862.03	3410.54	11542.7	9998.4			26		M623T30_2	y
528	3	Phenyldisilene	4.57442	2.19359	1.25384	0.314537	0.196327	UP	137.024	137.024	137.024	29.6159	29.541	29.6908	1795.29	6624.01	11473.1	31473.1	32352.4			26		M137T30	y
529	-	Unknown	1.82803	-0.870287	-1.26072	0.314641	0.196366	DOWN	374.3	374.3	374.301	28.835	28.7987	28.8713	2444.59	193518	114280	105862	37984.1			14		M374T29	y
530	-	Unknown	6.51874	-2.70459	-1.28246	0.316998	0.197244	DOWN	703.553	703.548	703.557	32.2007	32.1175	32.2838	7199.61	448179	498892	68486.9	118623			8		M704T32	y
531	2	Picrotoxinin	1.21743	-0.283837	-1.24845	0.319081	0.198016	DOWN	293.101	293.101	293.102	6.43	6.4015	6.5475	24964.5	757683	178521	622363	58102			24		M293T6_2	y
532	-	Unknown	3.14449	-1.65283	-1.24756	0.320846	0.198666	DOWN	497.379	497.379	497.379	32.2007	32.1175	32.2838	4659.28	354414	320646	112611	99426.6			8		M497T32	y
533	-	Unknown	1.19097	0.252133	1.15545	0.322492	0.19927	UP	245.194	245.194	245.194	10.1993	10.1837	10.215	50422.1	829064	128042	987388	199829	[13][M+1]+		13		M245T10_2	n
534	-	Unknown	3.4076	-1.76876	-1.29469	0.323261	0.199552	DOWN	549.374	549.373	549.375	28.835	28.7987	28.8713	5768.24	331173	311963	97186.7	25835.9			14		M549T29	y
535	6	Cassaidine	1.52432	-0.608165	-1.2583	0.323793	0.199746	DOWN	408.309	408.308	408.309	25.7036	25.6897	25.7175	29548	1.39587e+06	642337	915734	155568			40		M408T26	y
536	9	Arachidonoylmorpholine	1.22361	-0.291138	-1.16471	0.324994	0.200184	DOWN	374.302	374.3	374.305	25.8858	25.874	25.8975	1877.06	141478	33565.4	115624	18751.3			40		M374T26	y
537	2	2-(Butan-2-yl)-4-methylquinoline	2.92637	1.54911	1.22595	0.325425	0.200341	UP	200.143	200.143	200.143	29.7892	29.6908	29.8875	1596.46	15905.1	13779.5	46821.4	41448.8			26		M200T30	y
538	-	Unknown	2.28086	1.18958	1.2369	0.32596	0.200535	UP	680.585	680.585	680.585	31.7267	31.638	31.8155	2221.81	89852.9	155630	205598	45269.1	[62][M+1]+		15		M681T32	n
539	1	Silver(1+) propionate	1.55406	0.636046	1.12211	0.327737	0.201179	UP	181.949	181.949	181.949	30.6223	30.612	30.6325	2145.93	147291	98863.2	228900	78064.9			36		M182T31	y
540	-	Unknown	1.38906	0.474108	1.17061	0.328622	0.201498	UP	520.581	520.581	520.582	29.5211	29.5012	29.541	3774.45	194088	49216.4	269600	100304			7		M521T30	n
541	6	Benzyloctyl adipate	3.08021	-1.62303	-1.21317	0.331879	0.202669	DOWN	349.235	349.235	349.235	32.2007	32.1175	32.2838	33052.9	2.86311e+06	2.63888e+06	929420	811179			8		M349T32	y
542	1	Diphenylcarbonate	1.3532	0.43637	1.11625	0.33286	0.203019	UP	215.07	215.07	215.07	6.96967	6.942	6.99733	17186.7	287144	91526.2	388563	128014			23		M215T7	y
543	-	Unknown	2.78477	1.47756	1.1745	0.336463	0.204299	UP	706.6	706.597	706.603	32.2007	32.1175	32.2838	12935.2	341444	328173	951099	837030			8		M707T32_1	n
544	-	Unknown	3.46628	-1.79339	-1.2397	0.339072	0.205219	DOWN	678.573	678.572	678.573	28.7125	28.6263	28.7987	5662.11	353489	349952	101979	31842.1	[61][M+1]+		14		M679T29	n
545	0	1-O-Hexadecyl-2-desoxy-2-amino-sn-gly	1.30655	0.385763	1.10591	0.339933	0.205522	UP	316.321	316.321	316.321	13.6973	13.669	13.717	622326	8.83172e+06	2.32061e+06	1.15391e+07	3.54882e+06	[26][M]+		10		M316T14	y
546	-	Unknown	1.61609	0.692507	1.208	0.342471	0.206409	UP	561.513	561.506	561.519	31.6071	31.3887	31.8155	12756	596155	516466	963672	104599			15		M562T32	n
547	-	Unknown	2.93564	1.55367	1.16797	0.345627	0.207504	UP	632.589	632.587	632.591	29.7028	29.6908	29.7148	975.254	5596.55	5001.73	16707.9	15700.2			26		M633T30	n
548	5	Polyporusterone E	2.69954	-1.43271	-1.21108	0.347369	0.208106	DOWN	461.324	461.324	461.324	31.6402	31.638	31.8155	63999.5	5.97698e+06	5.35331e+06	2.21413e+06	550424	[45][M]+		15		M461T32_1	y
549	1	Pendimethalin	1.18239	0.241708	1.06593	0.34807	0.208347	UP	282.144	282.144	282.144	10.1837	10.1823	10.215	13018.4	325187	73614.5	384499	62203.9			13		M282T10	y
550	-	Unknown	4.17829	-2.06291	-1.18187	0.350791	0.209279	DOWN	649.538	649.538	649.538	32.2007	32.1175	32.2838	32031.6	2.09868e+06	2.2929e+06	502173	465637	[58][M]+		8		M650T32	y
551	9	Cer(d18:1/19:0)	2.54193	1.34592	1.1812	0.351882	0.209651	UP	580.561	580.561	580.561	29.7028	29.6908	29.7148	1351.43	15688.6	6610.62	39735.4	34636			26		M581T30	y
552	-	Unknown	1.96005	-0.970892	-1.14683	0.353468	0.21019	DOWN	495.57	495.57	495.57	28.719	28.6393	28.7987	14998.6	612378	432552	312430	134596	[48][M+1]+		14		M496T29_2	n
553	0	Palmitylstearylamine	2.03713	-1.02654	-1.15043	0.353594	0.210233	DOWN	494.566	494.566	494.566	28.719	28.6393	28.7987	41870.1	1.65164e+06	1.2139e+06	810769	359424	[48][M]+		14		M495T29_2	y
554	7	2-hydroxyethyl N-octadecylcarbamate	2.56748	1.36035	1.19021	0.354581	0.210567	UP	358.329	358.329	358.329	29.7028	29.6908	29.7148	1539.71	23683.1	4599.47	60662.1	53616.8			26		M358T30	y
555	5	Polyporusterone E	3.43304	-1.77949	-1.15725	0.355599	0.210911	DOWN	461.324	461.324	461.324	32.2007	32.1175	32.2838	63999.5	4.33303e+06	4.46346e+06	1.26205e+06	1.09702e+06	[46][M]+		8		M461T32_2	y
556	8	6α-Testosterone Enanthate	5.31648	-2.41047	-1.18661	0.356614	0.211253	DOWN	417.297	417.296	417.297	28.7125	28.6263	28.7987	20751.3	1.15814e+06	1.37048e+06	217840	74933.1			14		M417T29	y
557	-	Unknown	2.70087	-1.43343	-1.16895	0.357975	0.211711	DOWN	649.537	649.537	649.538	31.3998	31.3887	31.4647	32031.6	3.24828e+06	2.99364e+06	1.20273e+06	473901			35		M650T31	y
558	7	Hydroxyprolyl-Arginine	1.33077	-0.412258	-1.15928	0.3588	0.211987	DOWN	288.165	288.164	288.165	23.9872	23.9233	24.051	4383.19	362457	132120	272367	25725.9			51		M288T24	y
559	6	2,3-Bis(hexadecanoyloxy)propyl 3-hydro	2.80066	-1.48576	-1.12236	0.360151	0.212439	DOWN	689.531	689.528	689.534	31.6082	31.5762	31.6402	6576.46	580483	546872	207174	181163			15		M690T32	y
560	3	Rhodopin/ OH-Lycopene	2.49202	-1.31732	-1.09641	0.36076	0.212642	DOWN	555.458	555.457	555.458	31.5762	31.3887	31.638	5200.37	580721	505200	232946	215885			35		M555T32	y
561	7	N-Ethyl-2-benzothiazolamine	1.4101	0.495801	1.06908	0.361427	0.212864	UP	179.065	179.065	179.065	28.6253	28.6242	28.6263	4683.6	200709	117174	283020	63669.5			14		M179T29	y
562	6	8-(Octylselanyl)octanoic acid	1.69954	0.765141	1.11894	0.361754	0.212973	UP	337.162	337.162	337.162	8.08558	8.049	8.12217	3233.43	79696	26814.1	135446	82026.2			6		M337T8	y
563	2	2'-Apo-beta-carotenal	2.42222	-1.27633	-1.14655	0.362368	0.213177	DOWN	509.377	509.375	509.378	25.8858	25.874	25.8975	541.505	34660.2	30032.5	14368.7	6140.21			40		M509T26	y
564	-	Unknown	2.50898	-1.3271	-1.09709	0.362885	0.213349	DOWN	562.408	562.407	562.409	31.3887	31.207	31.5762	2353.76	264586	233310	105369	93548			35		M562T31	n
565	-	Unknown	1.38834	0.473366	1.08891	0.36341	0.213523	UP	521.585	521.585	521.586	29.7028	29.6908	29.7148	1814.51	101417	24686.8	140801	57576.8			26		M522T30	n
566	7	6α-Testosterone Enanthate	3.73404	-1.90074	-1.13359	0.365962	0.214365	DOWN	417.297	417.297	417.297	32.2007	32.1175	32.2838	63091	4.12643e+06	4.513e+06	1.10498e+06	972468	[42][M]+		8		M417T32	y
567	-	Unknown	2.15587	1.10827	1.14483	0.366024	0.214386	UP	679.576	679.576	679.577	31.7267	31.638	31.8155	5114.49	204876	354855	442306	55802.1	[62][M]+		15		M680T32_2	n
568	8	Butyl 3,4,5-trimethoxybenzoate	1.59299	0.671737	1.06855	0.366734	0.214619	UP	269.136	269.136	269.14	31.3605	31.207	31.3998	8914.07	742867	644243	1.18361e+06	308773			35		M269T31	y
569	-	Unknown	3.6633	-1.87314	-1.12697	0.367019	0.214713	DOWN	650.541	650.541	650.541	32.2007	32.1175	32.2838	14190.2	942629	1.02626e+06	257213	237680	[58][M+1]+		8		M651T32	n
570	7	Reticulataxanthin	1.40873	-0.494394	-1.03588	0.367262	0.214793	DOWN	473.345	473.344	473.346	23.4077	23.3833	23.432	1949.39	190584	77291.5	135288	50739.6			4		M473T23	y
571	1	Guanidine, 1-(4,6-dimethyl-2-pyrimidiny	2.43484	-1.28383	-1.13225	0.368463	0.215186	DOWN	260.131	260.131	260.131	17.9565	17.9513	17.9617	23799.8	662240	586803	272044	109335			46		M260T18	y
572	-	Unknown	3.26218	-1.70584	-1.1166	0.368807	0.215299	DOWN	418.302	418.301	418.302	32.2007	32.1175	32.2838	17383.1	1.2246e+06	1.27671e+06	375295	325040	[42][M+1]+		8		M418T32	n
573	5	1,2-Difluoro-3-(hexyloxy)benzene	1.58462	0.664137	1.01619	0.368992	0.215359	UP	215.125	215.125	215.125	31.3605	31.289	31.3998	9603.79	688750	530071	1.09141e+06	435945			35		M215T31	y
574	-	Unknown	1.20244	0.265971	1.00946	0.370111	0.215724	UP	317.324	317.324	317.325	13.6973	13.669	13.717	123631	1.71848e+06	436423	2.06638e+06	407259	[26][M+1]+		10		M317T14	n
575	-	Unknown	1.987	-0.990595	-1.13895	0.371545	0.216191	DOWN	649.538	649.538	649.538	28.7125	28.6263	28.7987	11560.9	814395	613316	409861	48016			14		M650T29_2	y
576	-	Unknown	1.4559	0.541913	1.11813	0.372236	0.216415	UP	388.394	388.394	388.394	20.5441	20.4942	20.594	67018.1	1.27439e+06	882142	1.85538e+06	178357			37		M388T21	y
577	-	Unknown	4.17151	-2.06057	-1.12316	0.377332	0.218058	DOWN	523.6	523.6	523.601	24.2872	24.1938	24.3805	728.455	42767.1	49994	10286.7	3081.05			54		M524T24	n
578	1	2-(Hydroxymethyl)-2-(((1-oxoheptyl)oxy	2.50788	-1.32647	-1.0506	0.377707	0.218178	DOWN	473.347	473.347	473.347	31.3887	31.207	31.5762	5251.4	653736	595128	260586	256770			35		M473T31	y
579	1	Decyl cyanoacetate	1.12028	-0.163854	-0.987237	0.379448	0.218734	DOWN	226.18	226.18	226.18	10.1837	10.1823	10.215	240650	4.05831e+06	547224	3.6226e+06	533760	[11][M]+		13		M226T10	y
580	6	PGE1 Alcohol	2.11135	1.07817	1.10046	0.381481	0.219381	UP	341.266	341.266	341.267	31.7967	31.7778	31.8155	7466.6	316455	548116	668756	83894.5			15		M341T32_1	y
581	-	Unknown	2.32469	-1.21704	-1.04053	0.381746	0.219465	DOWN	731.579	731.577	731.58	32.2007	32.1175	32.2838	4971.06	361454	315089	155403	135498			8		M732T32	n
582	-	Unknown	1.86782	0.901354	1.08433	0.383969	0.220168	UP	626.541	626.541	626.541	29.34	29.277	29.403	1327.05	40460.2	11264.9	75572.2	54943.4			22		M627T29_2	y
583	-	Unknown	2.10215	1.07187	1.083	0.384234	0.220251	UP	607.487	607.484	607.487	31.5762	31.3998	31.638	2923.01	149445	258846	314760	53861.2			35		M607T32	n
584	0	1-Isothiocyanato-3-phenylpropane	1.81078	0.856608	0.995938	0.384252	0.220257	UP	178.068	178.068	178.069	30.6325	30.612	30.7443	6084.23	263903	202508	477870	312182			36		M178T31	y
585	-	Unknown	2.46791	-1.30329	-1.04182	0.385188	0.220552	DOWN	677.569	677.569	677.569	31.4647	31.3887	31.5762	44878.1	4.50201e+06	4.15561e+06	1.82414e+06	1.59737e+06	[60][M]+		35		M678T31	y
586	-	Unknown	3.01622	-1.59274	-1.06309	0.386575	0.220987	DOWN	506.354	506.354	506.354	32.2007	32.1175	32.2838	12138.4	801723	842388	265708	230330	[50][M+1]+		8		M506T32_2	n
587	5	Protobassic acid	3.45361	-1.78811	-1.0659	0.38939	0.221867	DOWN	505.35	505.35	505.35	32.2007	32.1175	32.2838	39454.9	2.43937e+06	2.74874e+06	706223	613202	[50][M]+		8		M505T32_2	y
588	1	4-Biphenylamine	1.29875	0.377129	0.999963	0.391174	0.222422	UP	170.096	170.096	170.098	28.6263	28.6242	28.6393	11243.6	502903	231311	653148	119249			14		M170T29	y
589	6	N-butyl arachidonoyl amine	1.24836	0.320032	1.03716	0.391418	0.222497	UP	360.324	360.324	360.324	29.1243	29.105	29.1437	68561.4	1.45734e+06	190948	1.81928e+06	573483			22		M360T29_1	y
590	-	Unknown	2.20905	1.14342	0.968258	0.391506	0.222524	UP	544.462	544.462	544.463	31.7967	31.7778	31.8155	2916.65	127301	220491	281849	166775			15		M544T32	y
591	6	Benzo(f)quinoline	1.51337	-0.597762	-1.05322	0.391951	0.222662	DOWN	180.08	180.079	180.08	28.6253	28.6242	28.6263	37287.7	2.97314e+06	1.6084e+06	1.96459e+06	404959	[7][M]+		14		M180T29	y
592	-	Unknown	1.38321	-0.46802	-1.04137	0.392607	0.222865	DOWN	582.583	582.582	582.583	28.6318	28.6242	28.6393	4707.04	302508	133529	218700	40004.5			14		M583T29_1	n
593	6	Polyporusterone E	1.91087	-0.934231	-1.05546	0.392782	0.22292	DOWN	461.323	461.322	461.324	22.5383	22.465	22.6768	44597.8	895182	682515	468468	156605			41		M461T23	y
594	-	Unknown	2.2793	-1.18859	-1.00239	0.395527	0.223891	DOWN	516.431	516.431	516.431	31.4824	31.3887	31.5762	2262.46	268294	237648	117628	106296			35		M516T31	n
595	0	Methanol, (4,6-bis(bis(butoxymethyl)am	1.34511	-0.427729	-0.970435	0.395573	0.223907	DOWN	531.387	531.387	531.387	23.4912	23.487	23.702	4360.17	242171	93354	180037	59859.6			4		M531T23	y
596	-	Unknown	3.32234	-1.7322	-1.04177	0.397727	0.224852	DOWN	549.375	549.374	549.376	32.2007	32.1175	32.2838	15860.1	977027	1.10629e+06	293978	256510			8		M549T32	y
597	1	3,3'-(Dodecane-1,12-diyl)bis(N,N-dimet	2.21101	-1.14471	-0.991206	0.399946	0.225823	DOWN	393.298	393.298	393.298	29.5211	29.5012	29.541	838416	8.12198e+06	7.09071e+06	3.67334e+06	3.18611e+06	[39][M]+		7		M393T30	y
598	-	Unknown	2.42548	-1.27827	-0.996652	0.403558	0.227399	DOWN	550.628	550.627	550.628	32.2007	32.1175	32.2838	6861.14	424259	405390	174833	153475			8		M551T32	n
599	-	Unknown	3.87448	-1.954	-1.02533	0.40717	0.228968	DOWN	462.326	462.325	462.327	32.2007	32.1175	32.2838	19571.5	1.17532e+06	1.449e+06	303243	265727	[46][M+1]+		8		M462T32_2	n
600	-	Unknown	2.61275	-1.38557	-0.985098	0.412894	0.231442	DOWN	356.286	356.285	356.286	32.2007	32.1175	32.2838	4132.43	319565	330282	122221	106344			8		M356T32	y
601	1	2-(octadecylsulfanyl)naphthalene	1.19238	-0.253841	-0.917043	0.416244	0.232883	DOWN	413.324	413.324	413.324	23.6001	23.5892	23.611	20159.6	568776	100297	477011	141353	[41][M]+		49		M413T24_1	y
602	0	Dodecanoic acid, 3-(dimethyloxidoamino	1.82638	0.868989	0.91005	0.417736	0.233522	UP	302.269	302.268	302.269	28.678	28.6242	28.8428	4052.48	247326	309883	451712	235140			14		M302T29	y
603	8	Longifolicin	1.40003	-0.485454	-0.898097	0.42225	0.235452	DOWN	581.473	581.471	581.475	28.835	28.7987	28.8713	1728.31	140075	60355.6	100052	48116.6			14		M581T29	y
604	3	1-Hydroxy-2,2,6,6-tetramethylpiperidin-4-yl N,N'-didecylphosphorodiamidate	2.20065	-1.13793	-0.913555	0.42291	0.235733	DOWN	532.462	532.461	532.462	31.6082	31.5762	31.6402	5882.36	312638	276947	141988	167276			15		M532T32	y
605	8	Arachidonoylmorpholine	2.41344	-1.27109	-0.947409	0.42586	0.236988	DOWN	374.302	374.3	374.305	32.2007	32.1175	32.2838	2238.38	170983	172671	70762	61282.5			8		M374T32	y
606	-	Unknown	2.45479	1.2956	0.86987	0.439459	0.242718	UP	156.135	156.134	156.136	23.6565	23.611	23.702	12045.1	61847.7	101071	151823	147924			49		M156T24	n
607	2	1,1,1,2-tetrachloro-2-fluoroethane	1.48084	0.566412	0.865246	0.439973	0.242933	UP	184.889	184.889	184.889	30.4282	30.3378	30.5185	3771.81	247689	140368	366786	192707			36		M185T30_1	y
608	-	Unknown	1.58777	-0.667001	-0.941764	0.440556	0.243177	DOWN	182.096	182.093	182.099	28.6253	28.6242	28.6263	2504	191722	128491	120749	22982.4	[7][M+2]+		14		M182T29	n
609	5	Chlorotridodecylstannane	1.52418	0.608036	0.862155	0.442483	0.243981	UP	663.462	663.462	663.462	21.0986	21.025	21.1722	16996.2	262288	226227	399774	158468			52		M663T21	y
610	-	Unknown	1.38523	-0.470122	-0.911308	0.445575	0.245268	DOWN	159.099	159.099	159.1	28.6253	28.6242	28.6263	33685.2	2.97753e+06	1.50776e+06	2.14949e+06	451079	[5][M+1]+		14		M159T29	n
611	-	Unknown	2.00716	-1.00515	-0.879152	0.446201	0.245528	DOWN	394.301	394.301	394.301	29.5211	29.5012	29.541	209938	1.92216e+06	1.70942e+06	957579	830181	[39][M+1]+		7		M394T30	n
612	6	Stearoyl lactic acid	1.12957	-0.175772	-0.843404	0.446505	0.245654	DOWN	429.319	429.319	429.319	20.1543	20.1218	20.1868	11500.1	529244	87230.4	468537	89072.6			3		M429T20	y
613	5	2,2'-Methylenebis(4,6-dicyclopentyl-m-cresol)	1.31216	-0.391949	-0.840459	0.448064	0.246301	DOWN	501.375	501.374	501.376	23.4891	23.432	23.6757	19961.1	250051	88819.5	190564	84500.9			4		M501T23	y
614	-	Unknown	1.17407	-0.231514	-0.902826	0.451626	0.247773	DOWN	275.278	275.277	275.278	11.603	11.603	11.603	205534	3.62465e+06	996400	3.08726e+06	264734	[20][M+1]+		2		M275T12	n
615	-	Unknown	2.81324	-1.49223	-0.887798	0.457124	0.250036	DOWN	675.524	675.519	675.53	32.2007	32.1175	32.2838	8474.79	461492	558777	163950	157274			8		M676T32	n
616	1	Sodium capryloyl glycinate	1.29907	0.377481	0.823767	0.458537	0.250615	UP	252.157	252.157	252.157	6.06917	6.016	6.20383	82854.9	970100	477403	1.26023e+06	379759			33		M252T6	y
617	-	Unknown	1.84983	-0.887394	-0.866563	0.47092	0.255653	DOWN	649.538	649.537	649.538	29.2103	29.1437	29.277	20093.4	639939	574742	345945	122368			22		M650T29_1	y
618	1	Nonadecanamide	1.31537	0.395466	0.804281	0.473222	0.256582	UP	298.31	298.31	298.31	31.4824	31.3887	31.5762	2058.94	135558	50141.4	178309	77213.1			35		M298T31	y
619	-	Unknown	1.87792	-0.909138	-0.813448	0.474414	0.257062	DOWN	679.576	679.576	679.576	32.2007	32.1175	32.2838	6120.86	530293	465326	282315	249534			8		M680T32_1	n
620	8	4-n-dodecyloxyaniline	1.2678	0.342331	0.809411	0.474598	0.257136	UP	278.246	278.245	278.246	22.465	22.248	22.4842	51163.9	1.07486e+06	535492	1.36271e+06	304413			41		M278T22	y
621	-	Unknown	1.35931	-0.442877	-0.80796	0.47641	0.257865	DOWN	677.569	677.569	677.569	29.34	29.277	29.403	23156.4	998012	495763	734203	272120			22		M678T29_2	y
622	-	Unknown	1.2121	0.277504	0.788401	0.477499	0.258301	UP	356.291	356.291	356.293	25.874	25.7175	25.8975	16366.6	381854	107691	462844	141636			40		M356T26	y
623	-	Unknown	1.88431	-0.914037	-0.79478	0.484253	0.261001	DOWN	747.566	747.563	747.568	31.3887	31.289	31.5762	1691.57	192895	174647	102302	92068.5			35		M748T31	n
624	-	Unknown	1.8233	-0.866552	-0.788946	0.485841	0.261634	DOWN	745.594	745.592	745.595	32.2007	32.1175	32.2838	3373.77	265867	230953	145752	127277			8		M746T32	n
625	-	Unknown	1.88478	-0.914397	-0.815722	0.495744	0.26555	DOWN	523.601	523.601	523.601	31.4322	31.3998	31.4647	29334.1	1.17301e+06	1.15044e+06	622359	208725	[51][M+1]+		35		M524T31_1	n
626	-	Unknown	1.78967	-0.839691	-0.766421	0.49719	0.266119	DOWN	540.429	540.429	540.429	31.4824	31.3887	31.5762	2731.8	312316	272492	174447	151080			35		M540T31	n
627	6	Phenyl didecyl phosphite	1.13831	0.186898	0.80507	0.499319	0.266954	UP	439.336	439.335	439.337	29.1243	29.105	29.1437	2432.9	98384.3	6002.83	111992	28654.4			22		M439T29	y
628	5	4-Nitroprocainamide	1.85061	-0.887999	-0.815253	0.500287	0.267333	DOWN	266.151	266.151	266.151	11.1518	11.025	11.285	708234	7.79642e+06	7.60607e+06	4.2129e+06	333912	[19][M]+		1		M266T11	y
629	-	Unknown	1.86747	-0.901086	-0.747041	0.50161	0.267851	DOWN	543.459	543.458	543.459	31.5762	31.3887	31.638	6765.62	799909	710955	428271	486828			35		M543T32	y
630	-	Unknown	1.81047	-0.856362	-0.759197	0.502273	0.26811	DOWN	638.536	638.536	638.537	31.4824	31.3887	31.5762	2719.33	304134	274625	167922	145434			35		M639T31	y
631	-	Unknown	1.80891	-0.855121	-0.74221	0.504636	0.269032	DOWN	517.442	517.442	517.446	31.4647	31.3887	31.5762	6697.17	697796	604426	385691	406389			35		M517T31	y
632	-	Unknown	1.3034	-0.382278	-0.739053	0.505256	0.269274	DOWN	573.505	573.505	573.505	28.835	28.7987	28.8713	1950.7	173182	77268.2	132870	54364			14		M574T29	n
633	-	Unknown	1.86353	-0.898042	-0.754472	0.506972	0.269941	DOWN	651.547	651.546	651.548	32.2007	32.1175	32.2838	5084.65	388835	371590	208588	182064	[58][M+2]+		8		M652T32	n
634	1	Dioctyl hexanedioate	1.77209	0.825453	0.738905	0.508376	0.270487	UP	371.316	371.316	371.316	29.541	29.5012	29.7623	43711.7	275107	263303	487626	422890			7		M371T30	y
635	-	Unknown	1.57521	-0.65554	-0.730764	0.516866	0.273767	DOWN	459.356	459.356	459.356	23.7988	23.7832	23.8145	1258.11	26531.4	20242.1	16843.1	10842.3			50		M459T24	y
636	1	Undecanedioic acid, compound with 2,2'-iminodiethanol (1:2)	1.13596	0.183908	0.728401	0.517497	0.27401	UP	427.302	427.302	427.302	29.7379	29.6908	29.785	2083.1	113954	17699.1	129447	32310.1			26		M427T30	y
637	-	Unknown	1.81248	0.857962	0.734144	0.518071	0.27423	UP	487.394	487.394	487.396	31.4647	31.3998	31.5762	4703.67	231128	400326	419436	192653			35		M487T31	y
638	5	17,20-dimethyl Prostaglandin F1α	1.14717	-0.198078	-0.704708	0.520408	0.275127	DOWN	385.293	385.292	385.294	20.2354	20.1868	20.487	15912.3	612998	144807	534357	128025			3		M385T20	y
639	4	9-(Acetyloxy)octadec-12-enoic acid	1.74908	-0.806594	-0.7186	0.522381	0.275882	DOWN	341.267	341.265	341.269	32.2007	32.1175	32.2838	7466.6	628185	567099	359090	314773			8		M341T32_2	y
640	1	4,4,4-Trifluorobutanol	2.43299	1.28273	0.762729	0.523296	0.276232	UP	129.052	129.052	129.052	0.452917	0.446	0.459833	69417.3	429240	169363	1.04419e+06	1.38616e+06			32		M129T0	y
641	3	11-Methyl-3,6,9,12-tetraoxaoctacos-1-yl acetate	1.46057	-0.546529	-0.740589	0.525493	0.27707	DOWN	475.398	475.398	475.398	25.8858	25.874	25.8975	856.302	48137.1	33969	32957.8	10314.8			40		M475T26	y
642	-	Unknown	1.42245	-0.50838	-0.689894	0.528548	0.278233	DOWN	543.458	543.457	543.461	28.7987	28.6255	28.8713	2777.35	220603	121915	155086	110419			14		M543T29	y
643	1	1-Hexadecylamine	2.0514	-1.03661	-0.719509	0.532665	0.279794	DOWN	242.284	242.284	242.284	32.2007	32.1175	32.2838	10069.6	749741	869186	365403	317044			8		M242T32	y
644	1	2'-Apo-beta-carotenal	1.96616	-0.975382	-0.726786	0.532716	0.279813	DOWN	509.377	509.374	509.383	29.338	29.2537	29.5012	6215.26	100196	112374	50960	33761.6			22		M509T29	y
645	6	1-Hexacosanol, dihydrogen phosphate	1.48727	-0.57267	-0.709005	0.540532	0.282758	DOWN	463.388	463.384	463.393	28.835	28.7987	28.8713	2244.85	133342	101518	89655.3	32925.1			14		M463T29	y
646	-	Unknown	1.34563	-0.428282	-0.708937	0.542237	0.283397	DOWN	675.518	675.516	675.52	28.835	28.7987	28.8713	3733.56	202759	122039	150679	36002.4			14		M676T29	n
647	3	1,1,1,2-tetrachloro-2-fluoroethane	1.22432	0.291979	0.716858	0.542665	0.283557	UP	184.888	184.888	184.889	31.4824	31.3887	31.5762	3771.81	388265	206023	475360	42870.5			35		M185T31	y
648	5	17,20-dimethyl Prostaglandin F1α	1.44756	0.533623	0.722201	0.544858	0.284377	UP	385.293	385.289	385.294	23.084	22.942	23.2818	3609.18	145098	155542	210037	7957.03			4		M385T23	y
649	-	Unknown	1.68591	-0.753528	-0.67506	0.545761	0.284714	DOWN	637.534	637.533	637.534	31.4647	31.3887	31.5762	4119.58	435751	396148	258408	223858			35		M638T31	n
650	0	17,20-dimethyl Prostaglandin F1α	1.60935	-0.686474	-0.705116	0.548446	0.285715	DOWN	385.295	385.294	385.296	28.6253	28.6242	28.6263	4394.52	309880	281879	192550	60073.2			14		M385T29	y
651	1	4-Phenylpiperidine	1.38155	0.466286	0.712961	0.548624	0.285781	UP	162.128	162.128	162.128	23.611	23.521	23.8145	1245.3	54537.4	50312.6	75346	4913.76			49		M162T24	y
652	6	MG(0:0/20:3(11Z,14Z,17Z)/0:0)	1.41115	-0.496874	-0.670118	0.549842	0.286234	DOWN	381.298	381.298	381.298	26.7153	26.7	26.7307	212300	4.15118e+06	2.75475e+06	2.94169e+06	1.47788e+06	[38][M]+		18		M381T27	y
653	1	(9Z)-Octadec-9-enamide	1.3738	0.458171	0.697134	0.554759	0.288056	UP	282.279	282.279	282.279	23.2818	23.058	23.303	1.15716e+06	3.47199e+07	5.10698e+06	4.76982e+07	3.18379e+07			4		M282T23	y
654	1	Methanol, (4,6-bis(bis(butoxymethyl)am	1.71668	-0.779621	-0.670276	0.555533	0.288342	DOWN	531.387	531.382	531.389	29.2537	29.058	29.338	8033.48	504650	501093	293969	212833			22		M531T29	y
655	0	N-Stearylbenzylamine	1.79029	0.840193	0.662131	0.557559	0.28909	UP	360.362	360.362	360.363	23.3777	23.309	23.611	6753.53	362600	319636	649417	678783	[35][M]+		4		M360T23	y
656	-	Unknown	1.16121	-0.215631	-0.63224	0.56163	0.290587	DOWN	497.361	497.36	497.363	24.2872	24.1938	24.3805	520.976	45459.1	12494.2	39148	11950.9			54		M497T24	y
657	-	Unknown	2.22641	1.15472	0.686765	0.56169	0.290609	UP	350.238	350.238	350.238	20.005	19.835	20.1868	219024	1.37836e+06	468077	3.06879e+06	4.23757e+06	[33][M+1]+		3		M350T20	n
658	-	Unknown	1.634	-0.708404	-0.640409	0.56234	0.290848	DOWN	572.495	572.494	572.495	31.638	31.5762	31.6402	2594.84	290240	256297	177570	164834			15		M572T32	n
659	7	Citranaxanthin	1.15897	0.212849	0.669209	0.562994	0.291088	UP	457.35	457.35	457.35	23.487	23.372	23.4912	18953	461810	54505.2	535226	182031	[44][M]+		4		M457T23	y
660	4	O-Seryl-beta-N-acetylglucosaminide	1.51724	-0.601446	-0.667091	0.568354	0.293047	DOWN	309.131	309.131	309.131	11.934	11.9212	11.9382	156027	1.1831e+06	1.02428e+06	779775	217925			11		M309T12_1	y
661	-	Unknown	1.67167	0.741288	0.669128	0.568747	0.29319	UP	370.299	370.299	370.299	31.7967	31.7778	31.8155	4332.32	61317.6	106205	102984	18782.6			15		M370T32	y
662	-	Unknown	1.41035	0.496058	0.646411	0.569157	0.293339	UP	259.283	259.282	259.283	31.3887	31.289	31.3998	1325.09	108216	110334	152827	45982.8			35		M259T31	n
663	-	Unknown	2.14909	1.10373	0.674119	0.56965	0.293519	UP	113.964	113.964	113.964	0.452917	0.446	0.459833	24953.9	656306	43281.9	1.41032e+06	1.93684e+06			32		M114T0	n
664	6	Octadecyl fumarate	1.57576	-0.656052	-0.661796	0.570971	0.293999	DOWN	369.302	369.295	369.302	29.6908	29.541	29.8645	3649.37	283364	264793	179826	57567.4			26		M369T30	y
665	-	Unknown	1.6691	0.739072	0.658401	0.572928	0.29471	UP	608.489	608.489	608.49	31.4647	31.3998	31.5762	2275.91	113671	196884	190209	42158.4			35		M608T31	n
666	-	Unknown	1.57532	-0.655646	-0.612926	0.578859	0.296855	DOWN	612.521	612.521	612.522	31.4824	31.3887	31.5762	3024.18	337791	295237	214374	185657			35		M613T31	y
667	0	Phytoene 1,2-epoxide	1.34632	-0.429027	-0.631562	0.580654	0.297502	DOWN	561.503	561.503	561.503	28.835	28.7987	28.8713	1986.45	144081	95764.8	107018	34070.1			14		M562T29	y
668	1	3,5,8-Trimethylquinoline	1.26369	-0.337638	-0.624107	0.584133	0.298752	DOWN	172.112	172.112	172.112	28.6253	28.6242	28.6263	30576.9	3.39512e+06	1.84433e+06	2.68668e+06	681162			14		M172T29	y
669	4	S-Phosphocysteine	1.36002	0.44363	0.638794	0.584925	0.299036	UP	201.993	201.992	201.993	0.459833	0.446	0.525167	8560.69	474238	81062.3	644974	455788			32		M202T0	y
670	-	Unknown	2.04716	-1.03362	-0.624399	0.585468	0.29923	DOWN	601.535	601.534	601.536	28.835	28.7987	28.8713	59940.4	643119	863953	314152	293780			14		M602T29	y
671	-	Unknown	1.62849	0.70353	0.605269	0.586551	0.299618	UP	607.485	607.484	607.486	29.6159	29.541	29.6908	1439.5	19627.7	17014.6	32053.7	31223.8			26		M607T30	y
672	-	Unknown	1.37566	-0.460122	-0.604256	0.589019	0.3005	DOWN	382.301	382.301	382.301	26.7153	26.7	26.7307	49274.2	942542	659435	685158	330839	[38][M+1]+		18		M382T27	n
673	-	Unknown	1.34251	0.424928	0.617916	0.589121	0.300536	UP	589.537	589.535	589.542	31.6402	31.5762	31.8155	6361.34	497571	452816	668184	153851			15		M590T32	n
674	0	({[1-(4-Chlorobutoxy)-3-(hexadecyloxy)propan-2-yl]oxy}methyl)benzene	1.1659	-0.221446	-0.609913	0.589499	0.300671	DOWN	497.376	497.372	497.377	28.7987	28.678	28.8713	1893.62	108263	17032.9	92857.5	40296.3			14		M497T29	y
675	4	1-[(Octadecyloxy)methyl]pyrene	1.5448	-0.627418	-0.590841	0.59132	0.30132	DOWN	485.38	485.379	485.38	31.4824	31.3887	31.5762	8985.3	389817	338178	252291	219481			35		M485T31	y
676	-	Unknown	1.68546	-0.753141	-0.631088	0.591559	0.301405	DOWN	603.548	603.546	603.551	28.7987	28.6255	28.8428	2279.31	160739	178668	95367.9	16327.7			14		M604T29	n
677	-	Unknown	1.46795	-0.553802	-0.628849	0.592662	0.301798	DOWN	528.429	528.429	528.429	31.3998	31.3887	31.5762	2886.07	313696	273884	213795	26468.3			35		M528T31	y
678	7	Benzyloctyl adipate	2.19934	1.13707	0.624672	0.595385	0.302764	UP	349.235	349.235	349.235	20.2072	19.835	20.3242	1.16613e+06	9.75397e+06	2.31578e+06	2.14524e+07	3.23537e+07	[33][M]+		3		M349T20	y
679	-	Unknown	1.40209	-0.487581	-0.578529	0.595627	0.30285	DOWN	611.517	611.517	611.517	25.8858	25.874	25.8975	921.866	30566.4	16422.1	21656.7	21020.2			40		M612T26	y
680	6	Boviquinone 4	1.59125	-0.67016	-0.585836	0.596612	0.303199	DOWN	413.266	413.266	413.267	29.541	29.5012	29.7623	102162	1.35566e+06	1.28767e+06	851892	748493	[40][M]+		7		M413T30	y
681	-	Unknown	1.47903	-0.564651	-0.588173	0.601891	0.305064	DOWN	530.447	530.447	530.449	31.3998	31.3887	31.5762	2784.12	322594	282754	218209	120582	[53][M+1]+		35		M530T31	n
682	1	2-Ethylbenzothiazole	1.5161	0.600361	0.561909	0.60859	0.307415	UP	164.053	164.053	164.053	31.5762	31.3605	31.638	8289.63	445007	388923	674748	591804			35		M164T32	y
683	-	Unknown	1.52149	-0.605488	-0.559775	0.608602	0.307419	DOWN	601.542	601.538	601.545	32.198	32.1175	32.2838	7044.67	465294	402963	305765	285088			8		M602T32	y
684	4	Carbazole	1.30159	-0.380277	-0.582298	0.612312	0.308715	DOWN	168.08	168.08	168.08	28.6253	28.6242	28.6263	9712.72	704842	468189	541523	129590			14		M168T29	y
685	-	Unknown	1.16726	-0.223126	-0.547814	0.613466	0.309117	DOWN	640.587	640.587	640.588	29.1243	29.105	29.1437	32309.3	994184	295965	851725	339534			22		M641T29_1	n
686	6	Dihexadecyl (R(R*,R*))-tartrate	1.51708	-0.601296	-0.553084	0.61445	0.309459	DOWN	599.521	599.52	599.521	31.4647	31.3887	31.5762	5862.67	595697	535319	392612	343384			35		M600T31	y
687	-	Unknown	1.42126	-0.507171	-0.583735	0.616729	0.310251	DOWN	527.426	527.426	527.428	31.3998	31.3887	31.5762	5937.64	592746	516571	417157	67809.8			35		M527T31	y
688	2	2,6-Dimethylquinoline	1.25385	-0.326359	-0.561003	0.617631	0.310564	DOWN	158.096	158.096	158.096	28.6253	28.6242	28.6263	271042	3.15464e+07	1.81004e+07	2.51598e+07	7.82241e+06	[5][M]+		14		M158T29	y
689	9	Lycoxanthin	1.50997	-0.594523	-0.54582	0.6185	0.310865	DOWN	553.445	553.445	553.447	31.3887	31.207	31.5762	3922.33	407185	364948	269615	239561			35		M553T31	y
690	-	Unknown	1.45404	-0.540063	-0.573155	0.620966	0.311718	DOWN	745.592	745.591	745.593	28.835	28.7987	28.8713	1679.59	83394	77023.7	57452.4	14596.4			14		M746T29	y
691	-	Unknown	1.09211	0.127123	0.528789	0.625091	0.31314	UP	414.326	414.326	414.326	23.6001	23.5892	23.611	4807.38	131298	26911.8	143392	29070.8	[41][M+1]+		49		M414T24	n
692	-	Unknown	1.46277	-0.548705	-0.560339	0.630919	0.315139	DOWN	136.084	136.084	136.084	4.32633	4.32383	4.33	140552	2.20657e+06	2.1499e+06	1.50848e+06	184885	[1][M+1]+		25		M136T4	n
693	-	Unknown	1.45462	-0.540643	-0.509335	0.640444	0.318382	DOWN	624.521	624.521	624.522	31.4824	31.207	31.638	3473.41	332732	290837	228697	201439			35		M625T31	n
694	-	Unknown	1.27455	0.349983	0.535254	0.641624	0.318782	UP	410.436	410.436	410.436	31.3998	31.3887	31.5762	5296.58	441975	383592	563501	86620.8			35		M410T31	y
695	-	Unknown	1.28886	0.366092	0.528565	0.645258	0.32001	UP	181.084	181.084	181.084	28.6253	28.6242	28.6263	5723.72	260339	239922	335540	56236.5	[7][M+1]+		14		M181T29	n
696	6	Octadecyl fumarate	1.19554	-0.257664	-0.529502	0.647974	0.320925	DOWN	369.298	369.298	369.299	23.9233	23.7993	23.987	19681.1	678359	360193	567407	44515.8			51		M369T24	y
697	-	Unknown	1.3691	-0.453233	-0.530236	0.648588	0.321131	DOWN	622.506	622.505	622.507	31.3998	31.207	31.5762	3412.6	306619	269183	224061	16391.1			35		M623T31	y
698	-	Unknown	1.16149	-0.215978	-0.491004	0.656355	0.323732	DOWN	564.608	564.608	564.608	29.34	29.277	29.403	2119.22	120688	52096.8	103908	28102.7			22		M565T29	n
699	-	Unknown	1.37119	-0.455425	-0.511564	0.657966	0.324269	DOWN	621.504	621.504	621.505	31.4647	31.3998	31.6402	6269.88	479761	434672	349993	64082.9			35		M622T31	n
700	-	Unknown	1.50131	0.586225	0.502914	0.66429	0.326368	UP	430.322	430.322	430.323	31.3998	31.289	31.5762	2324.91	123843	214503	186360	18594.6	[43][M+1]+		35		M430T31	n
701	2	N-Hexadecyl-N,N-diphenylanilinium chloride	1.22874	0.297177	0.471239	0.66718	0.327323	UP	506.354	506.353	506.355	28.719	28.6393	28.7987	11190.5	287455	207478	353206	123929			14		M506T29	y
702	6	PE-Cer(d14:2(4E,6E)/19:0)	1.42874	-0.514741	-0.47423	0.669418	0.328061	DOWN	645.493	645.493	645.493	30.2731	30.2083	30.3378	29293.3	719279	713835	503437	334520			20		M645T30	y
703	-	Unknown	1.3269	-0.408065	-0.4764	0.677225	0.330622	DOWN	431.332	431.332	431.333	31.3942	31.207	31.5762	5164.6	471460	412472	355417	88693.5	[43][M+2]+		35		M431T31	n
704	-	Unknown	1.18137	0.240464	0.456414	0.680772	0.331779	UP	145.084	145.084	145.084	28.6253	28.6242	28.6263	41307.9	2.27743e+06	1.41992e+06	2.69049e+06	664092	[3][M+1]+		14		M145T29	n
705	2	Benzothiazole	1.24552	0.316743	0.467809	0.68106	0.331873	UP	136.021	136.021	136.022	31.4322	31.3605	31.5762	42093.2	3.50755e+06	3.08653e+06	4.36889e+06	802227	[2][M]+		35		M136T31	y
706	-	Unknown	1.11318	-0.154689	-0.44376	0.682339	0.332289	DOWN	675.518	675.516	675.521	25.8858	25.874	25.8975	908.991	59781.3	19252.9	53703.1	13862.1			40		M676T26	n
707	-	Unknown	1.36263	0.446392	0.437166	0.68531	0.333254	UP	361.365	361.365	361.366	29.1437	29.105	29.338	6644.34	187809	208541	256110	172452	[37][M+1]+		22		M361T29	n
708	2	6-Methylquinoline	1.39982	0.485244	0.436606	0.686881	0.333763	UP	144.081	144.08	144.081	32.2007	32.1175	32.2838	713831	4.36401e+07	4.0866e+07	6.10885e+07	5.58682e+07	[4][M]+		8		M144T32	y
709	-	Unknown	1.36866	-0.452768	-0.433394	0.688904	0.334417	DOWN	625.541	625.539	625.543	31.4824	31.3887	31.5762	4515.52	463599	401611	338685	296522			35		M626T31	y
710	-	Unknown	1.13266	0.179712	0.442205	0.690221	0.334842	UP	458.353	458.353	458.353	23.487	23.372	23.4912	5645.1	140952	30477.5	159650	66596	[44][M+1]+		4		M458T23	n
711	5	N-(3-(15-methyl-hexadecanoyloxy)-13-methyl-tetradecanoyl)-L-serine	1.369	-0.453119	-0.425878	0.693689	0.335959	DOWN	626.539	626.538	626.54	31.4647	31.3887	31.5762	3169.27	328097	287407	239624	216495			35		M627T31	y
712	-	Unknown	1.61793	0.69415	0.446493	0.693921	0.336034	UP	141.958	141.958	141.958	0.445333	0.444	0.459833	86326	2.78152e+06	1.7465e+06	4.50017e+06	6.43421e+06			32		M142T0	y
713	0	Palmitylstearylamine	1.18328	-0.242794	-0.423853	0.695359	0.336496	DOWN	494.566	494.566	494.566	29.1243	29.105	29.1437	41870.1	948735	484686	801783	354533	[47][M]+		22		M495T29_1	y
714	-	Unknown	1.14445	-0.194651	-0.419467	0.696897	0.336989	DOWN	679.576	679.575	679.576	29.34	29.277	29.403	3081	126300	49965.4	110359	42850.7			22		M680T29	n
715	-	Unknown	1.29411	-0.371956	-0.447916	0.697088	0.337051	DOWN	264.164	264.164	264.164	12.942	12.8927	12.945	24921.1	471011	411303	363966	46583.8	[18][M+1]+		39		M264T13_1	n
716	-	Unknown	1.32412	-0.405036	-0.42901	0.69882	0.337605	DOWN	520.461	520.461	520.462	31.3998	31.3887	31.5762	2939.36	348783	313330	263516	142597			35		M520T31	n
717	-	Unknown	1.37078	0.454995	0.41459	0.699781	0.337913	UP	267.155	267.155	267.155	11.2184	11.1518	11.285	90526.9	972020	1.03294e+06	1.33242e+06	1.09548e+06	[19][M+1]+		1		M267T11_2	n
718	-	Unknown	1.13613	0.184132	0.407182	0.70511	0.339612	UP	540.434	540.434	540.434	28.6328	28.6263	28.6393	1427.86	142845	62455.8	162291	54236.5			14		M540T29	n
719	1	1-{7-[8-Methyl-5-(3-methylbutyl)nonyl]-9H-fluoren-2-yl}pentan-1-one	1.28044	-0.356641	-0.432388	0.705995	0.339894	DOWN	461.378	461.375	461.379	31.3998	31.3605	31.5762	3649.31	377049	326671	294581	49170			35		M461T31	y
720	7	MG(0:0/18:2(9Z,12Z)/0:0)	1.06465	-0.0903792	-0.400927	0.709017	0.340853	DOWN	355.282	355.281	355.283	21.8448	21.636	22.0742	16950.9	1.01229e+06	182936	950816	192499	[34][M]+		43		M355T22	y
721	8	PE-Cer(d16:2(4E,6E)/24:0(2OH))	1.34002	-0.422252	-0.398987	0.71189	0.341762	DOWN	759.607	759.606	759.608	32.2007	32.1175	32.2838	2452.95	184940	163650	137976	121586			8		M760T32	y
722	-	Unknown	1.31924	-0.399703	-0.383802	0.722121	0.344979	DOWN	621.503	621.502	621.503	29.5211	29.5012	29.541	2086.46	30638.8	26914.4	23189.8	20141.1			7		M622T30	n
723	-	Unknown	1.06459	-0.0902968	-0.377605	0.727102	0.346534	DOWN	666.604	666.604	666.605	29.34	29.277	29.403	9260.29	369882	58748.4	347441	84524			22		M667T29_2	n
724	5	Methanol, (4,6-bis(bis(butoxymethyl)amino)-s-triazin-2-ylimino)di-	1.30654	-0.38575	-0.366317	0.734022	0.348682	DOWN	531.389	531.389	531.389	29.5211	29.5012	29.541	8033.48	166058	147300	127064	110891			7		M531T30	y
725	-	Unknown	1.27418	0.349573	0.371867	0.734174	0.348729	UP	608.493	608.491	608.495	29.7028	29.6908	29.7148	1577.65	24980.4	14814.6	31685.8	27494.5			26		M608T30	n
726	-	Unknown	1.14873	-0.200042	-0.372349	0.739304	0.350312	DOWN	589.535	589.535	589.536	28.7987	28.6255	28.8713	1635.13	113094	64442.2	98451.2	22061.3			14		M590T29	y
727	4	2,4-difluoro-1-tetradecoxybenzene	1.28787	-0.364982	-0.343208	0.749987	0.353584	DOWN	327.251	327.25	327.251	31.4267	31.207	31.5762	4586.84	420900	379718	326788	285295			35		M327T31	y
728	0	3,5,8-Trimethylquinoline	1.2963	-0.374399	-0.333512	0.756513	0.355567	DOWN	172.112	172.112	172.112	32.2007	32.1175	32.2838	52781.9	3.09205e+06	2.90545e+06	2.38526e+06	2.2432e+06			8		M172T32	y
729	-	Unknown	1.28135	-0.357662	-0.333044	0.757078	0.355738	DOWN	635.515	635.515	635.516	31.4824	31.3887	31.5762	3835.93	333846	305275	260511	228616			35		M636T31	n
730	0	N-(9beta-D-2'-Deoxyribofuranosylpurin-6-yl)glycinamide	1.28482	-0.361562	-0.352436	0.757679	0.35592	DOWN	309.131	309.131	309.131	31.4322	31.3605	31.5762	64498.7	4.04032e+06	4.38223e+06	3.14478e+06	407518			35		M309T31	y
731	10	CerP(d18:1/8:0)	1.34586	0.428533	0.335836	0.760012	0.356625	UP	506.356	506.355	506.357	27.3508	27.35	27.3517	11190.5	255553	197089	343940	411041			53		M506T27	y
732	0	Lidocaine hydrochloride monohydrate	1.08161	-0.113183	-0.329692	0.768884	0.359292	DOWN	289.168	289.167	289.168	20.5441	20.4942	20.594	23484.5	548086	208581	506731	60803.1			37		M289T21	y
733	1	Butyl 5-oxido-5-oxo-N-(trimethylsilyl)-L-norvalinate	1.20209	-0.265539	-0.329886	0.771989	0.360221	DOWN	275.155	275.154	275.155	31.3998	31.3887	31.5762	9937.5	1.00218e+06	877124	833825	109779			35		M275T31	y
734	1	4-Methylpiperazine-1-sulfonamide	1.24116	-0.311691	-0.291909	0.785288	0.364166	DOWN	180.08	180.08	180.081	32.2007	32.1175	32.2838	88740.1	7.95246e+06	7.02563e+06	6.40725e+06	5.89096e+06			8		M180T32	y
735	-	Unknown	1.2628	0.336627	0.290876	0.785612	0.364262	UP	458.355	458.355	458.355	29.7028	29.6908	29.7148	1709.29	56080	62888.3	70855.7	61531.8			26		M458T30	y
736	-	Unknown	1.12779	-0.173496	-0.285415	0.789504	0.365407	DOWN	585.503	585.502	585.504	28.835	28.7987	28.8713	2245.39	201659	99258.4	178809	96827.9			14		M586T29	n
737	-	Unknown	1.23855	0.308654	0.283956	0.790834	0.365797	UP	145.084	145.084	145.084	32.2007	32.1175	32.2838	82616.4	4.562e+06	4.32961e+06	5.65031e+06	5.03213e+06	[4][M+1]+		8		M145T32	n
738	6	6α-Testosterone Enanthate	1.18457	0.244362	0.283795	0.791116	0.36588	UP	417.297	417.297	417.297	23.4891	23.487	23.4912	9404.62	76584.9	55018.9	90720.1	66448.3			4		M417T23	y
739	1	N-Stearylbenzylamine	1.19577	-0.257941	-0.288445	0.79736	0.367706	DOWN	360.362	360.362	360.362	29.1437	29.105	29.338	19678.4	1.50441e+06	1.43319e+06	1.25811e+06	365191	[37][M]+		22		M360T29_2	y
740	1	Methanol, (4,6-bis(bis(butoxymethyl)amino)-s-triazin-2-ylimino)di-	1.29145	0.368996	0.291686	0.797778	0.367828	UP	531.387	531.387	531.387	31.7267	31.638	31.8155	8693.65	413950	716983	534970	48448			15		M531T32	y
741	6	17,20-dimethyl Prostaglandin F1α	1.21769	-0.284143	-0.291652	0.797865	0.367853	DOWN	385.292	385.292	385.294	31.3998	31.3887	31.4647	6432.37	675628	715440	554963	40696			35		M385T31	y
742	-	Unknown	1.18	0.238781	0.271953	0.799157	0.36823	UP	529.442	529.442	529.442	28.835	28.7987	28.8713	6394.03	208658	173740	246216	164414			14		M529T29	n
743	-	Unknown	1.24001	-0.310349	-0.271164	0.799899	0.368445	DOWN	533.472	533.472	533.472	32.2007	32.1175	32.2838	6555.19	461642	429119	372261	376562			8		M533T32	y
744	-	Unknown	1.16537	-0.220791	-0.286565	0.800009	0.368478	DOWN	370.3	370.3	370.301	23.5892	23.5508	23.7993	4501.86	160943	135960	138104	23875.4			49		M370T24	n
745	-	Unknown	1.20935	-0.274235	-0.265004	0.804496	0.36978	DOWN	414.27	414.27	414.27	29.5211	29.5012	29.541	26606	277559	241137	229485	201440	[40][M+1]+		7		M414T30	n
746	3	Naphthalene, 2-(dodecyloxy)-6-(4-octylphenyl)-	1.13296	-0.1801	-0.267788	0.806122	0.370251	DOWN	501.407	501.407	501.408	28.835	28.7987	28.8713	3344.54	212891	143194	187906	74897.2			14		M501T29	y
747	-	Unknown	1.18395	0.243603	0.271729	0.807292	0.370589	UP	546.481	546.479	546.482	29.7028	29.6908	29.7148	2155.81	37543.7	13378.7	44305.9	40974.4			26		M546T30	y
748	7	Arachidonoyl amine	1.1195	0.16285	0.271555	0.809863	0.371331	UP	304.261	304.261	304.261	23.2818	23.058	23.303	319935	1.16129e+07	1.67128e+06	1.30006e+07	8.69194e+06			4		M304T23	y
749	6	Stearoyl lactic acid	1.09097	-0.125612	-0.253941	0.815059	0.372825	DOWN	429.319	429.319	429.319	29.6159	29.541	29.6908	5896.85	305473	86372.2	280001	150744			26		M429T30	y
750	-	Unknown	1.0684	-0.0954555	-0.262392	0.816937	0.373363	DOWN	657.517	657.515	657.519	28.835	28.7987	28.8713	2039.36	81978	34387.8	76729.5	4216.34			14		M658T29	y
751	8	N-stearoyl glutamic acid	1.20331	0.267014	0.241529	0.821026	0.374532	UP	414.325	414.324	414.325	29.2103	29.1437	29.277	23507.1	208264	216916	250607	212489			22		M414T29	y
752	-	Unknown	1.09443	-0.130174	-0.239987	0.822701	0.37501	DOWN	495.57	495.57	495.57	29.1243	29.105	29.1437	14998.6	350254	170659	320035	135809	[47][M+1]+		22		M496T29_1	n
753	-	Unknown	1.12473	0.169578	0.239337	0.823414	0.375213	UP	533.472	533.472	533.473	28.835	28.7987	28.8713	3103.7	182936	99820.4	205753	131540			14		M533T29	y
754	5	Theasapogenol E	1.33588	-0.417788	-0.250372	0.825372	0.37577	DOWN	505.35	505.35	505.35	31.7967	31.7778	31.8155	39454.9	1.53756e+06	2.66314e+06	1.15119e+06	228109	[49][M]+		15		M505T32_1	y
755	-	Unknown	1.18246	0.241787	0.222661	0.835732	0.3787	UP	684.203	684.203	684.203	29.34	29.277	29.403	10752.7	324840	269777	384109	373879			22		M684T29	y
756	-	Unknown	1.15463	-0.207436	-0.230606	0.836889	0.379026	DOWN	759.609	759.608	759.609	28.835	28.7987	28.8713	1002.5	48908	46790	42482.6	11822.2			14		M760T29	y
757	-	Unknown	1.06667	-0.0931185	-0.211529	0.84305	0.380754	DOWN	520.582	520.582	520.582	29.2958	29.2537	29.338	3774.45	310041	120585	290661	103148			22		M521T29	n
758	1	N-Undecanoylglycine	1.02368	0.033762	0.208529	0.845212	0.381358	UP	244.191	244.191	244.191	10.1837	10.1823	10.215	362554	6.23468e+06	928436	6.38231e+06	800950	[13][M]+		13		M244T10	y
759	-	Unknown	1.2767	-0.352421	-0.215592	0.849076	0.382434	DOWN	506.354	506.354	506.354	31.7967	31.7778	31.8155	12138.4	482316	835395	378008	66030.6	[49][M+1]+		15		M506T32_1	n
760	8	Phosphoric acid, tris(decyl) ester	1.10042	0.138059	0.188958	0.859789	0.3854	UP	519.458	519.457	519.459	28.835	28.7987	28.8713	3861.65	202668	115724	223020	146329			14		M519T29	y
761	-	Unknown	1.11486	-0.15686	-0.19842	0.861024	0.38574	DOWN	611.518	611.518	611.52	31.3998	31.3887	31.5762	4319.73	503592	451534	451838	14512.3			35		M612T31	y
762	-	Unknown	1.11823	0.161218	0.186234	0.862474	0.386139	UP	333.334	333.334	333.334	26.2523	26.2375	26.267	26899.4	1.16965e+06	723841	1.30794e+06	1.06312e+06			45		M333T26	n
763	3	11,11'-(Piperazine-1,4-diyl)bis(2-chlorod	1.19959	0.262542	0.192424	0.86304	0.386294	UP	541.121	541.121	541.121	31.7967	31.7778	31.8155	158009	2.27912e+06	3.94756e+06	2.73436e+06	1.09902e+06			15		M541T32	y
764	6	N-butyl arachidonoyl amine	1.05229	0.0735325	0.191968	0.863717	0.38648	UP	360.324	360.324	360.324	30.2731	30.2083	30.3378	48333.9	1.0205e+06	466994	1.07387e+06	117158			20		M360T30	y
765	-	Unknown	1.1137	-0.155359	-0.178757	0.869958	0.388189	DOWN	531.457	531.457	531.458	31.3998	31.3887	31.5762	16749	789772	702761	709272	338395	[53][M+2]+		35		M531T31_2	n
766	10	N-Formyl-L-alanylglycinamide	1.08922	0.123289	0.181549	0.870577	0.388358	UP	174.089	174.088	174.09	30.5843	30.534	30.6345	5194.16	413712	338671	450621	96430.4			36		M174T31	y
767	1	Cyanamide, [4,6-bis[(1-methylethyl)amino]-1,3,5-triazin-2-yl]-	1.01823	-0.0260649	-0.1787	0.870914	0.38845	DOWN	236.162	236.162	236.162	9.653	9.61567	9.7835	208949	8.33362e+06	549706	8.18441e+06	1.33767e+06			19		M236T10	y
768	3	Cer(d18:2/18:1)	1.13434	0.181854	0.166674	0.875713	0.389756	UP	562.518	562.517	562.518	26.7153	26.7	26.7307	6791.69	143577	142399	162885	141349			18		M563T27	y
769	3	2-Trifluoromethylcycloheptanone	1.13001	-0.176336	-0.164956	0.877069	0.390124	DOWN	181.084	181.084	181.084	31.4824	31.3887	31.5762	12611.6	1.21281e+06	1.0908e+06	1.07325e+06	978413			35		M181T31	y
770	-	Unknown	1.0473	-0.0666721	-0.15909	0.884477	0.392127	DOWN	585.502	585.502	585.502	25.8858	25.874	25.8975	2209.52	92234.1	41391	88068.6	18532.5			40		M586T26	y
771	6	5-(Trifluoromethyl)isoxazole	1.13621	0.184225	0.152684	0.886206	0.392593	UP	138.017	138.017	138.017	29.6159	29.541	29.6908	920.13	10460.5	12445.8	11904.9	10657.2			26		M138T30	y
772	-	Unknown	1.11816	0.161131	0.143113	0.893285	0.394492	UP	622.506	622.505	622.506	29.6159	29.541	29.6908	1271.19	18720.9	17502.3	20950	20530.4			26		M623T30_1	y
773	-	Unknown	1.104	-0.14274	-0.135679	0.898649	0.395922	DOWN	129.986	129.986	129.986	32.2007	32.1175	32.2838	6462.4	333737	291793	302284	275813			8		M130T32	y
774	-	Unknown	1.05179	-0.0728509	-0.11629	0.917358	0.400861	DOWN	481.444	481.443	481.444	28.6517	28.6255	28.678	1979.06	79925.6	57505.8	75989.9	11374.4			14		M481T29	y
775	5	2-Amino-5,6-dimethylbenzothiazole	1.07986	-0.110843	-0.10569	0.920921	0.401792	DOWN	179.065	179.064	179.065	31.4824	31.3887	31.5762	9657.6	916275	798023	848503	772466			35		M179T31	y
776	-	Unknown	1.08848	0.122311	0.105163	0.921639	0.40198	UP	603.547	603.541	603.55	31.5762	31.4647	31.6402	5117.55	335614	297151	365321	388705			35		M604T32	n
777	-	Unknown	1.08639	-0.119539	-0.101745	0.924164	0.402638	DOWN	159.1	159.099	159.1	32.2007	32.1175	32.2838	62373.5	4.5069e+06	4.83878e+06	4.14851e+06	3.71614e+06	[6][M+1]+		8		M159T32	n
778	1	Phenylacetylene	1.08051	0.111709	0.103032	0.927324	0.403459	UP	103.054	103.054	103.054	31.3034	31.207	31.3998	11602.1	585326	22770.5	632449	791849			35		M103T31	y
779	-	Unknown	1.05637	-0.079118	-0.0990326	0.927421	0.403484	DOWN	164.141	164.126	164.143	28.6393	28.6263	28.843	2913.17	216164	179867	204629	91382.4			14		M164T29	n
780	6	2,3-Diaceto-1-stearin	1.0974	0.134093	0.0961267	0.931675	0.404586	UP	443.334	443.334	443.334	31.638	31.5762	31.8155	15075.2	817780	1.41644e+06	897749	264536			15		M443T32	y
781	2	6-Methylquinoline	1.02944	0.0418566	0.087276	0.936429	0.405813	UP	144.081	144.08	144.081	28.6253	28.6242	28.6263	333247	2.10893e+07	1.12829e+07	2.17101e+07	4.94908e+06	[3][M]+		14		M144T29	y
782	4	4-Octadecyl-2-sulfanylphenol	1.04733	-0.06672	-0.0895877	0.93663	0.405864	DOWN	379.302	379.301	379.302	29.7028	29.6908	29.7148	2081.67	45371.9	4319.88	43177.5	42204.4			26		M379T30	y
783	1	2,6-Dimethylquinoline	1.06705	-0.093625	-0.0825265	0.938337	0.406304	DOWN	158.096	158.096	158.096	32.2007	32.1175	32.2838	459680	3.28238e+07	3.34707e+07	3.07613e+07	2.74498e+07	[6][M]+		8		M158T32	y
784	-	Unknown	1.05664	-0.0794794	-0.0825705	0.938385	0.406316	DOWN	531.38	531.372	531.387	18.6615	18.578	18.745	1083.41	59514.5	52789.2	56324.5	41122.5			30		M531T19	y
785	1	Isopentyl trifluoroacetate	1.09054	-0.125046	-0.0848378	0.939786	0.406676	DOWN	185.079	185.078	185.079	3.6365	3.63417	3.669	380127	5.30613e+06	8.88211e+06	4.86559e+06	1.41526e+06			12		M185T4	y
786	-	Unknown	1.04115	-0.0581771	-0.0687416	0.949725	0.409217	DOWN	545.473	545.473	545.474	31.3998	31.3887	31.5762	6182.64	665971	596242	639788	282363	[54][M]+		35		M545T31	y
787	7	1-Hexadecanol, hydrogen phosphate	1.02392	-0.0341083	-0.0597139	0.955323	0.410638	DOWN	547.489	547.488	547.49	28.835	28.7987	28.8713	2762.82	185001	80977.2	180679	95719.9			14		M547T29	y
788	5	Cyclopropanecarboxylic acid, 2,2-dimethyl-3-(2-methyl-1-propenyl)-, (3-(phenylmethoxy)phenyl)methyl ester, (1R-trans)-	1.03785	-0.0535951	-0.0579894	0.957787	0.411262	DOWN	365.209	365.209	365.209	20.1868	20.005	20.2275	180751	1.87628e+06	795830	1.80786e+06	1.88239e+06			3		M365T20	y
789	8	3-Oxochol-4-en-24-oic Acid	1.03845	0.0544262	0.0592681	0.958055	0.41133	UP	373.271	373.271	373.272	31.3887	31.289	31.3998	3316.73	261567	297107	271773	26065.5			35		M373T31	y
790	0	Pyrazinetetracarboxamide	1.01269	-0.0181948	-0.0543664	0.960676	0.411991	DOWN	253.068	253.067	253.068	6.43	6.4015	6.5475	4713.98	194472	73076.9	192034	26244.5			24		M253T6	y
791	8	1,1'-{Oxybis[(4,1-phenylene)methylene]}bis(2-methyldecahydroisoquinoline)	1.02262	-0.0322644	-0.039241	0.970872	0.414551	DOWN	501.388	501.377	501.399	29.8157	29.785	29.8463	4889.87	254755	135465	249121	208547			26		M501T30	y
792	8	Campesteryl glucoside	1.04594	-0.0647953	-0.0387117	0.971653	0.414746	DOWN	563.426	563.426	563.426	31.3768	31.289	31.4647	2653.68	131937	228521	126273	109475			35		M563T31	y
793	2	1-Naphthaleneacetonitrile	1.00824	0.0118355	0.0162482	0.98847	0.418918	UP	168.08	168.08	168.08	31.6402	31.5762	31.8155	21293.9	2.40798e+06	2.11276e+06	2.42796e+06	270058			15		M168T32	y
794	8	Dihexadecyl peroxodicarbonate	1.00836	-0.0120095	-0.0153608	0.989095	0.419071	DOWN	571.489	571.486	571.492	31.3942	31.207	31.5762	5726.54	650888	586956	645635	79584.7			35		M571T31	y
795	0	4-Biphenylamine	1.00842	-0.0120997	-0.0109073	0.991823	0.419742	DOWN	170.096	170.096	170.097	32.2007	32.1175	32.2838	21559.5	1.4461e+06	1.41255e+06	1.43402e+06	1.29757e+06			8		M170T32	y
796	-	Unknown	1.00609	-0.00875953	-0.00539611	0.996154	0.420804	DOWN	462.327	462.327	462.327	31.7967	31.7778	31.8155	19571.5	511931	886690	509118	170262	[45][M+1]+		15		M462T32_1	n
797	-	Unknown	1.0019	-0.0027399	-0.00507779	0.996194	0.420813	DOWN	575.519	575.519	575.52	28.835	28.7987	28.8713	2881.43	170834	74338.6	170510	81840.7			14		M576T29	y
798	0	Tridodecylamine	1.0052	-0.00748872	-0.00501907	0.996445	0.420875	DOWN	522.597	522.597	522.597	31.4322	31.3998	31.4647	70449.6	2.03504e+06	3.52479e+06	2.02479e+06	295744	[51][M]+		35		M523T31_1	y

## Sheet: Table S2
Supplementary Table S2. Total identified metabolites in pairwise carbon source comparison between sucrose versus glucose
featureidx	ppm	Putative metabolites	fold	log2fold	tstat	pvalue	qvalue	updown	mzmed	mzmin	mzmax	rtmed	rtmin	rtmax	maxint	dataset1_mean	dataset1_sd	dataset2_mean	dataset2_sd	isotopes	adducts	peakgroup	metlin	name	METLIN_MSMS	usernotes
1	-	Unknown	48.1789	5.59033	75.9492	5.26248e-06	0.00183367	UP	110.009	110.008	110.009	15.5167	15.488	15.5453	5207.34	27897.7	26699.2	1.34408e+06	13715.5			22		M110T16	n
2	3	2-Amino-8-bromoadenosine	5.24729	2.39157	22.5725	2.2838e-05	0.00317946	UP	361.025	361.024	361.025	6.43	6.4015	6.5475	9859.86	105424	24152.5	553193	24437			19		M361T6	y
3	-	Unknown	3.74193	1.90378	20.3837	3.52994e-05	0.00344686	UP	258.274	258.273	258.275	22.4746	22.465	22.4842	9778.31	117745	20007.8	440593	18768.8			36		M258T22	n
4	3	1-Hydroxy-3-methyl-3,4-dihydro-2(1H)-quinoxalinone 4-oxide compound with N,N-diethylamine (1:1)	71.3165	6.15616	34.9362	4.03466e-05	0.00351462	UP	266.151	266.151	266.151	28.0937	28.0383	28.149	4691.33	5727.01	9919.48	423606	18188.3			52		M266T28	y
5	8	(Prop-2-yn-1-yl)germane	12.8166	3.67995	19.8875	0.000119833	0.00754066	UP	116.976	116.976	116.976	0.525167	0.525	0.529	6261.77	104213	90332.6	1.33702e+06	58034.2			31		M117T1	y
6	0	[2-(2-{[tert-Butyl(dimethyl)silyl]oxy}ethyl)phenyl]boronic acid	22.7871	4.51015	14.6639	0.000143756	0.00834847	UP	281.174	281.173	281.175	13.7072	13.6973	13.717	3768.98	7627.46	13211.1	178657	15282.7			9		M281T14	y
7	3	Oxaziridine-2-sulfonic acid	261.166	8.02882	44.0405	0.000509191	0.020738	UP	125.986	125.986	125.986	15.5167	15.488	15.5453	15990.6	18038.1	5636.99	4.71094e+06	184479			22		M126T16	y
8	2	Phosphorothioic O,O,O-acid--2,3-dichloropropan-1-ol (1/3)	3501.67	11.7738	40.3119	0.000614797	0.0230495	UP	498.901	498.901	498.901	28.0475	28.0383	28.0567	7972.63	0	0	1.11767e+06	48021.9			52		M499T28	y
9	6	PGE1 Alcohol	16.1992	4.01785	9.88404	0.000669706	0.0241119	UP	341.266	341.266	341.267	31.7967	31.7778	31.8155	5623.45	41070.4	71136	668756	83894.5			7		M341T32	y
10	2	Benzensulfonate	10.2875	3.36282	10.7305	0.000836285	0.0268746	UP	158.003	158.003	158.003	0.525167	0.525	0.529	20489.2	404838	339089	4.16476e+06	503337			31		M158T1	y
11	0	1-Propene, 1,1-dichloro-3,3,3-trifluoro-	83.0555	6.376	26.6966	0.000861881	0.0272474	UP	164.948	164.948	164.948	19.205	19.14	19.27	8850.84	21179.2	23810.5	1.75905e+06	110209			23		M165T19	y
12	1	2,4,5-Trimethylaniline	3.52623	1.81813	8.70699	0.00117352	0.0309749	UP	136.112	136.112	136.112	26.1337	26.1307	26.1367	5635.98	121299	38167.7	427727	47528.4			29		M136T26	y
13	1	Silane, diphenyldi-2-propenyl-	6.4391	2.68686	10.3219	0.0012255	0.0314801	UP	265.141	265.141	265.141	13.5633	13.471	13.5828	57082.5	257436	200138	1.65766e+06	123094			9		M265T14	y
14	0	1,1-Propanediol, 2,2,3,3,3-pentafluoro-	33.0649	5.04723	20.3772	0.00134693	0.0325611	UP	167.013	167.012	167.013	5.78867	5.669	5.7915	3296.47	7847.1	5178.84	259464	20750.8			24		M167T6	y
15	0	Methyl 2-fluoro-4-(4,4,5,5-tetramethyl-1,3,2-dioxaborolan-2-yl)benzoate	7.26896	2.86175	8.19238	0.00147241	0.0335518	UP	281.136	281.136	281.136	10.1837	10.1823	10.215	11172.4	126199	104581	917337	130537			13		M281T10	y
16	3	4-tert-Butyl-2-(prop-2-en-1-yl)aniline	10.4713	3.38837	9.11607	0.00195939	0.0365163	UP	190.158	190.158	190.159	24.5502	24.463	24.6885	572.641	5645.96	8898.85	60234.6	5327.78			53		M190T25	y
17	0	([1,1'-Biphenyl]-4-yl)(phenyl)methanethione	2.57534	1.36476	7.2569	0.00201747	0.0367993	UP	275.089	275.089	275.089	5.81183	5.78867	5.835	11584.5	223713	62866.6	576138	55885.6			39		M275T6	y
18	0	2,2-Dichloroethane-1-peroxol	384.834	8.58809	21.8192	0.00206435	0.0370191	UP	130.966	130.966	130.966	21.3757	21.289	21.4623	5720.34	2405.32	2923.88	966594	76483.3			44		M131T21	y
19	-	Unknown	4.96609	2.31211	7.29438	0.00208104	0.0370956	UP	136.084	136.084	136.084	4.32633	4.32383	4.33	9264.71	303757	218287	1.50848e+06	184885	[2][M+1]+		20		M136T4	n
20	2	Benzensulfonate	206.488	7.68992	20.1826	0.002399	0.0383959	UP	158.003	158.003	158.003	5.81183	5.78867	5.835	14282.3	4375.08	3497.66	903401	77074.4			39		M158T6	y
21	2	Benzensulfonate	55.3414	5.79029	18.5098	0.00254122	0.0388953	UP	158.003	158.003	158.003	15.5342	15.488	15.5453	8256.92	37919	23316.9	2.09849e+06	191402			22		M158T16	y
22	4	2-carboxybenzenesulfonate	251.663	7.97535	18.6336	0.0027677	0.0396064	UP	201.992	201.992	201.992	23.9472	23.702	23.9535	2632.92	1111.96	1925.97	333389	30826.2			47		M202T24	y
23	0	(2-Fluoro-5-phenoxyphenyl)boronic acid	2.17827	1.12318	17.7907	0.00287485	0.0399115	UP	233.078	233.077	233.079	6.43	6.4015	6.6305	10417.1	306251	3509.76	667099	34955.3			19		M233T6	y
24	-	Unknown	34.4477	5.10634	11.7171	0.00291465	0.0400203	UP	333.334	333.334	333.334	21.2306	21.1722	21.289	2337.13	8424.17	14591.1	297523	40167.1			44		M333T21	n
25	0	2,2-Dichloroethane-1-peroxol	160.781	7.32895	18.1121	0.00296796	0.0401623	UP	130.966	130.966	130.966	19.27	19.14	19.2745	4792.57	6318.84	4788.64	1.01595e+06	96431.6			23		M131T19	y
26	-	Unknown	17.8898	4.16107	8.19809	0.00331925	0.041004	UP	345.356	345.356	345.356	31.3998	31.289	31.4647	5068.8	34812.1	60296.2	626589	109527	[36][M+1]+		7		M345T31	n
27	1	2-(Butan-2-yl)-4-methylquinoline	15.2889	3.93441	7.47272	0.00361604	0.0416088	UP	200.143	200.143	200.143	31.7267	31.638	31.8155	2252	16764.5	29037	259565	48207.4			7		M200T32	y
28	0	Guanine, 8-(p-nitrophenyl)-	2.75277	1.46089	7.74686	0.00373952	0.0418366	UP	273.073	273.073	273.073	7.97675	7.91467	8.049	6971.14	263975	90124.8	726663	50784.5			6		M273T8	y
29	-	Unknown	401.137	8.64795	16.0702	0.00384003	0.042013	UP	156.948	156.948	156.948	15.5342	15.488	15.5453	10282.5	6709.43	5005.05	2.6914e+06	289313			22		M157T16	y
30	9	2,6,13,17-Tetraazatricosan-23-ol	145.743	7.18728	15.7762	0.00387171	0.042067	UP	345.356	345.355	345.356	21.0986	21.025	21.1722	1341.82	1318.9	1372.17	207726	22619.6			50		M345T21	y
31	-	Unknown	1273.35	10.3144	15.9482	0.00390865	0.042129	UP	110.009	110.009	110.009	11.603	11.603	11.603	5360.38	0	0	406430	44140.4			5		M110T12	n
32	1	4-Octyloxyphenylboronic acid	353.711	8.46643	15.7087	0.00396703	0.042225	UP	251.181	251.181	251.181	18.7477	18.745	18.7505	6467.67	4470.14	7742.51	1.6564e+06	181978			23		M251T19	y
33	0	beta-D-Ribofuranuronamide, 1-(6-amino-9H-purin-9-yl)-1-deoxy-N-(2-ethoxy-2-oxoethyl)-, monohydrate	2.91369	1.54285	7.09497	0.00400475	0.0422857	UP	367.136	367.136	367.136	10.1837	10.1823	10.215	23653.2	255821	62983.6	745383	101571			13		M367T10	y
34	1	4-Nitroprocainamide	300.773	8.23253	14.8429	0.00442621	0.0432516	UP	266.15	266.149	266.15	13.6973	13.471	13.717	15469.5	4578.64	7930.44	1.44113e+06	167448			9		M266T14	y
35	-	Unknown	3.08633	1.62589	5.98711	0.00461645	0.0436419	UP	138.063	138.063	138.063	4.32508	4.29167	4.463	16925.7	792194	296363	2.44497e+06	375218	[2][M+2]+		20		M138T4	n
36	-	Unknown	4.03503	2.01258	7.14424	0.00462748	0.0436638	UP	289.293	289.293	289.293	11.7367	11.735	11.7378	95670	508173	324548	2.05049e+06	185699	[24][M+1]+		5		M289T12	n
37	2	Phosphoroselenoic acid	8.885	3.15137	7.52801	0.00488174	0.0441456	UP	162.907	162.907	162.907	19.27	19.14	19.2745	3624.13	78247.5	126324	696174	65234.2			23		M163T19	y
38	-	Unknown	2769.14	11.4352	13.9774	0.00507957	0.0444937	UP	317.324	317.324	317.325	19.205	19.14	19.27	3296.72	0	0	883856	109525	[31][M+1]+		23		M317T19	n
39	0	Silane, naphthalenylphenyl-	4.69505	2.23114	5.75004	0.00522972	0.0447436	UP	235.094	235.094	235.094	5.13492	5.11283	5.157	6062.63	49110.9	42679.4	230578	34152.9			42		M235T5	y
40	1	2-(Trifluoroacetyl)cyclooctan-1-one	4.59468	2.19996	10.705	0.00555709	0.0452502	UP	223.094	223.094	223.094	5.78867	5.669	5.7915	21218.6	247294	139370	1.13624e+06	35536.1			24		M223T6	y
41	4	N-(2,3-Dibromopropyl)formohydrazide	27.4864	4.78065	9.36582	0.00558459	0.0452905	UP	258.909	258.908	258.909	21.7362	21.636	21.8365	698.537	2170.46	3759.35	65507	11093.3			43		M259T22	y
42	-	Unknown	94.2576	6.55854	12.4335	0.00568751	0.0454386	UP	319.303	319.303	319.303	25.7036	25.6897	25.7175	2917.59	3344.3	5792.49	335282	45876.5	[33][M+1]+		35		M319T26	n
43	0	Propan-1-ol--triphenylsilanol (1/1)	6.96353	2.79982	7.47687	0.00571313	0.0454748	UP	337.162	337.162	337.162	13.5828	13.5633	13.669	5206.37	64129.7	38376.5	446569	79850.4			9		M337T14_1	y
44	-	Unknown	1154.65	10.1732	12.8723	0.00598103	0.0458378	UP	275.277	275.277	275.277	29.2103	29.1437	29.277	3130.41	0	0	368541	49589.5			12		M275T29	n
45	0	1,3-bis(2-ethylhexoxy)propan-2-amine	14491.4	13.8229	12.7339	0.00611058	0.0460038	UP	316.321	316.321	316.321	19.2722	19.27	19.2745	15060.2	0	0	4.62537e+06	629138	[31][M]+		23		M316T19	y
46	-	Unknown	134.491	7.07137	12.2015	0.0065367	0.0465108	UP	110.009	110.008	110.009	23.9472	23.702	23.9535	3349.21	2808.04	2653.95	391965	55178.5			47		M110T24	n
47	4	Diethyl (2-methoxyethyl)propylpropanedioate	658.103	9.36217	12.1137	0.0067458	0.0467397	UP	261.169	261.169	261.169	18.7477	18.745	18.7505	1151.68	0	0	210054	30034.1			23		M261T19	y
48	0	3-Oxooctanoic acid glycerides	29.8441	4.89937	11.0683	0.00705163	0.0470538	UP	250.141	250.141	250.141	4.94667	4.93433	4.959	3716.07	9858.08	6100.13	294206	44076.7			42		M250T5	y
49	1	1-(3-Isocyanatopropoxy)undecane	2.16862	1.11677	5.46118	0.00708137	0.0470831	UP	256.227	256.227	256.227	14.3893	14.347	14.52	8742.68	206645	61948.4	448134	45037.5			32		M256T14	y
50	0	Ammonium pentadecanoate	243.457	7.92753	11.401	0.00756531	0.0475321	UP	260.258	260.258	260.259	19.27	19.14	19.2745	3926.6	3446.67	3563.18	865020	130842			23		M260T19_2	y
51	0	Phosphohydroxypyruvic acid	5.08988	2.34763	5.14585	0.00758071	0.0475456	UP	184.985	184.985	184.985	29.6908	29.6255	29.8875	19685.3	358192	310380	1.8237e+06	383388			21		M185T30	y
52	1	L-Lysine mono(3-methyl-2-oxobutyrate)	1.74981	0.807197	5.32926	0.00771615	0.0476621	UP	263.162	263.162	263.162	12.942	12.8927	12.945	56470.8	990768	141660	1.73365e+06	195519	[18][M]+		33		M263T13	y
53	3	Oxaziridine-2-sulfonic acid	1036.95	10.0181	11.2974	0.00774356	0.0476853	UP	125.986	125.986	125.986	13.6832	13.669	13.6973	16649.6	1815.51	960.337	1.88259e+06	288348			9		M126T14	y
54	2	2,4,6(1H,3H,5H)-Pyrimidinetrione, 1,3-bis(2-methoxyethyl)-	5.41002	2.43563	6.20706	0.00787352	0.0477932	UP	245.113	245.112	245.113	9.653	9.61567	9.7835	7716.59	64866.3	37842.7	350928	70283.9			16		M245T10_1	y
55	0	5-[4-(trifluoromethyl)phenyl]cyclohexane-1,3-dione	1.83512	0.875875	4.96313	0.00823482	0.0480776	UP	257.078	257.078	257.079	6.9945	6.942	6.99733	19828.4	310910	58583.1	570558	69128			18		M257T7	y
56	3	Oxaziridine-2-sulfonic acid	1291.12	10.3344	10.7697	0.00851084	0.0482806	UP	125.986	125.986	125.986	23.9472	23.702	23.9535	10104.1	855.426	780.774	1.24183e+06	199579			47		M126T24	y	mzmed similar as id 53=56but RT differnce
57	-	Unknown	1416.92	10.4685	10.7226	0.00858579	0.0483338	UP	122.964	122.964	122.964	21.636	21.4623	21.8365	3310.6	0	0	452255	73054.1			43		M123T22	n
58	0	5,7-Dimethyl[1,2,4]triazolo[1,5-a]pyrimidine-2-carbohydrazide	3.44068	1.7827	7.77493	0.00890018	0.0485482	UP	207.099	207.099	207.1	5.225	5.11567	5.42583	12547.4	243227	125486	836866	41744			42		M207T5	y
59	0	4-Octyloxyphenylboronic acid	755.198	9.56071	10.5283	0.00890128	0.0485489	UP	251.181	251.181	251.181	31.7267	31.638	31.8155	2288.88	0	0	241045	39655.1			7		M251T32	y
60	0	(2S,3R)-2-aminoheptadecane-1,3-diol	7005.47	12.7743	10.4747	0.00899136	0.0486079	UP	288.29	288.29	288.29	23.1732	23.1623	23.1842	71062.1	868.063	1503.53	7.57186e+06	1.25191e+06			3		M288T23	y
61	0	(2S,3R)-2-aminoheptadecane-1,3-diol	3.80603	1.92829	6.56133	0.00906809	0.0486574	UP	288.29	288.29	288.29	11.7367	11.735	11.7378	537618	2.93409e+06	1.98143e+06	1.11672e+07	893021	[24][M]+		5		M288T12	y
62	-	Unknown	12.8789	3.68694	7.30997	0.0091207	0.0486908	UP	111.984	111.984	111.984	21.7362	21.636	21.8365	938.959	6474.47	6311.6	83384.4	17095.4			43		M112T22	n
63	4	TG(12:0/12:0/17:2(9Z,12Z))[iso3] (Triacylglycerol)	7.63524	2.93267	5.81523	0.00914481	0.0487061	UP	705.6	705.6	705.6	31.4322	31.3998	31.4647	25661.5	417090	722421	3.18621e+06	397945			7		M706T31	y
64	2	2,2,3,4,4-Pentafluorobut-3-enenitrile	10.9228	3.44927	7.98966	0.00921679	0.0487511	UP	158.003	158.003	158.003	21.7362	21.636	21.8365	1384.65	8477.45	5280.52	92597.7	17454.9			43		M158T22	y
65	0	Nonadecan-10-amine	15.3825	3.94322	6.23706	0.00950102	0.048923	UP	284.331	284.331	284.331	31.7267	31.638	31.8155	4448.75	32820.1	56846	508129	119127			7		M284T32	y
66	7	3,4-Dihydro-3-thioxo-1,2,4-triazin-5(2H)-one	1765.61	10.786	10.1748	0.00952158	0.0489351	UP	130.008	130.008	130.008	5.73025	5.669	5.7915	7592.37	0	0	563550	95932.6			24		M130T6	y
67	-	Unknown	3.41479	1.7718	4.68858	0.00955214	0.048953	UP	361.366	361.366	361.366	18.745	18.578	18.7505	23801.5	428497	281529	1.46323e+06	258565			23		M361T19	n
68	0	Adenosine, 3'-amino-3'-deoxy-2'-O-methyl-	5.51948	2.46453	4.69083	0.00955352	0.0489538	UP	281.136	281.136	281.136	12.2397	12.198	12.2897	14109.5	160865	181157	887892	198108			27		M281T12	y
69	0	Fructoselysine	16.5077	4.04507	9.08867	0.0097744	0.0492312	UP	309.167	309.167	309.167	11.603	11.603	11.603	11313.6	21493.8	11111.2	354813	62542.1			5		M309T12_2	y
70	1	(2-anilino-2-oxoethyl) N,N-dimethylcarbamodithioate	2.60749	1.38266	9.18876	0.0101214	0.0496484	UP	255.062	255.062	255.062	4.9335	4.93267	4.93433	8530.61	302224	90574.2	788046	13506.7			42		M255T5	y
71	2	Phosphorothioic O,O,O-acid--2,3-dichloropropan-1-ol (1/3)	1453.06	10.5049	9.81941	0.0102126	0.0497545	UP	498.901	498.901	498.901	31.7967	31.7778	31.8155	5349.57	0	0	463791	81808.3			7		M499T32	y
72	1	Ammonium pentadecanoate	184.571	7.52803	9.70243	0.0103022	0.0498572	UP	260.258	260.258	260.258	11.9297	11.9212	11.9382	3476.76	1951.29	3379.74	399426	70875.6			11		M260T12	y
73	2	1-Hydroxy-3-methyl-3,4-dihydro-2(1H)-quinoxalinone 4-oxide compound with N,N-diethylamine (1:1)	548.688	9.09984	9.64444	0.0105806	0.0504224	UP	266.15	266.15	266.151	31.7267	31.638	31.8155	1460.08	0	0	175131	31451.8			7		M266T32	y
74	6	3,4-Dihydro-3-thioxo-1,2,4-triazin-5(2H)-one	2073.25	11.0177	9.2523	0.0114808	0.0521368	UP	130.008	130.008	130.008	11.7358	11.735	11.7367	8054.14	0	0	661741	123879			5		M130T12	y
75	0	1-Decene, 4-(methylseleno)-	2.24393	1.16603	5.35165	0.012454	0.0538177	UP	235.096	235.096	235.096	6.9945	6.942	6.99733	17642.5	337021	63186.9	756252	120072			18		M235T7	y
76	1	Diethylammonium diethyldithiocarbamate	2.70074	1.43335	6.25034	0.0127955	0.0543695	UP	223.131	223.131	223.131	9.71825	9.653	9.7835	24242.6	277920	122318	750588	46848.4			16		M223T10	y
77	-	Unknown	423.057	8.72471	8.7197	0.0128982	0.054532	UP	361.365	361.364	361.365	23.2327	23.1623	23.303	1432.61	0	0	135032	26822.2	[38][M+1]+		3		M361T23	n
78	2	N,N-Dimethyldodecylamine-N-oxide	55.9639	5.80642	8.18231	0.0129894	0.0546748	UP	230.247	230.247	230.248	19.3487	19.2745	19.4228	2145.04	3639.91	6304.52	215612	44425.7			23		M230T19	y
79	0	cis-4-(6-Amino-9H-purin-9-yl)-D-prolinol	2.91968	1.54581	6.56314	0.0131649	0.0549462	UP	235.13	235.13	235.131	9.34983	9.20183	9.388	48826.6	511177	82252.6	1.49247e+06	245561			14		M235T9	y
80	6	7-Bromo-6-hydroxy-1,2-dimethylquinolin-1-ium iodide	9.66431	3.27267	6.19094	0.0131701	0.054954	UP	379.916	379.916	379.917	28.9792	28.843	29.105	8175.11	140583	121387	1.35864e+06	318425			12		M380T29	y
81	6	N-butyl arachidonoyl amine	1.54446	0.627103	4.34326	0.0133681	0.0552546	UP	360.324	360.324	360.324	30.2731	30.2083	30.3378	48333.9	695301	95211.9	1.07387e+06	117158			17		M360T30	y
82	-	Unknown	7.21291	2.85058	5.70672	0.0137783	0.0558596	UP	706.604	706.603	706.604	31.4322	31.3998	31.4647	12935.2	219750	380619	1.58657e+06	165004	[55][M+1]+		7		M707T31	n
83	0	Mannopine	11.715	3.55028	6.3442	0.0138154	0.0559131	UP	311.146	311.146	311.147	14.3687	14.347	14.3893	6412.96	29848.2	28636.1	350918	82846.9			32		M311T14	y
84	1	Pendimethalin	2.25905	1.17572	4.12389	0.0146261	0.0570392	UP	282.144	282.144	282.144	10.1837	10.1823	10.215	10464	170204	65050.4	384499	62203.9			13		M282T10	y
85	4	2-Chloro-1-methylpyridinium iodide	108.32	6.75915	8.01786	0.0149731	0.0574966	UP	255.939	255.939	255.939	23.7507	23.702	23.7993	657.475	462.46	801.004	73142.7	15680.2			47		M256T24	y
86	0	1,1,1-Trifluoro-2-hydroxy-6-methylhept-2-en-4-one	3.99792	1.99925	6.42276	0.0152748	0.0578829	UP	197.078	197.078	197.079	6.61275	6.5475	6.678	5568.44	62653.6	14551.6	250484	48517.8			19		M197T7	y
87	2	Aleprylic acid	3.11539	1.63941	4.0737	0.0152753	0.0578836	UP	197.153	197.153	197.153	11.2184	11.1518	11.285	7452.58	91180.3	59610.1	284062	56322			1		M197T11	y
88	-	Unknown	6.31738	2.65933	4.43694	0.0153331	0.0579564	UP	621.504	621.504	621.504	31.4322	31.3998	31.4647	2991.4	55188.8	95589.8	349993	64082.9			7		M622T31	n
89	0	1-O-Hexadecyl-2-desoxy-2-amino-sn-glycerol	2.65546	1.40896	5.29413	0.0154	0.0580403	UP	316.321	316.321	316.321	29.0421	28.843	29.1565	60883.9	3.38203e+06	768128	8.98087e+06	1.6629e+06	[29][M]+		12		M316T29	y
90	2	2-[1-(4-Fluorophenyl)ethenyl]-4,4,5,5-tetramethyl-1,3,2-dioxaborolane	2.8144	1.49283	4.04967	0.0155673	0.058248	UP	249.146	249.146	249.146	11.1518	11.025	11.285	39412.4	409536	230608	1.1526e+06	218685			1		M249T11	y
91	0	3H-Phosphol-3-one, 5-ethoxy-1,2-dihydro-1-phenyl-, 1-sulfide	4.20905	2.0735	5.30536	0.0156118	0.0583026	UP	253.045	253.044	253.045	4.32508	4.29167	4.463	17735.4	571309	247947	2.40467e+06	544769			20		M253T4_1	y
92	0	1,1,1-trifluoro-6-methylhept-5-ene-2,4-dione	3.79166	1.92283	4.60813	0.0158326	0.0585711	UP	195.063	195.063	195.063	3.6365	3.63417	3.669	11098.3	503825	271928	1.91033e+06	453365			40		M195T4	y
93	1	5,9-dinitrotridecane-2,12-dione	4.6978	2.23199	7.28768	0.0159544	0.058717	UP	303.155	303.155	303.155	13.6832	13.669	13.6973	10155.6	67484.9	9370.91	317031	58564.2			9		M303T14	y
94	-	Unknown	2.17165	1.11879	4.0737	0.0159929	0.0587629	UP	317.325	317.324	317.325	28.9792	28.843	29.0168	12134.7	852352	323689	1.85101e+06	274803			12		M317T29_2	n
95	0	C16 Sphinganine	5779.18	12.4966	7.80184	0.0160347	0.0588125	UP	274.274	274.274	274.274	25.7036	25.6897	25.7175	16164.7	0	0	1.8446e+06	409512			35		M274T26	y
96	4	ecdysone palmitate	2.09757	-1.06872	-5.85647	0.016375	0.0593735	DOWN	703.548	703.547	703.548	28.4879	28.4783	28.4975	2764.94	231625	11907.4	110425	33809.2			49		M704T28	y
97	2	COUMARINIC ACID METHYL ETHER	8.96644	3.16454	6.35936	0.0168318	0.0601067	UP	179.07	179.07	179.07	6.65425	6.6305	6.678	6377.45	38725.3	21963.7	347228	81103.2			45		M179T7	y
98	0	Guanine, 8-(p-nitrophenyl)-	2.10899	1.07656	5.5605	0.0170013	0.0603731	UP	273.073	273.073	273.073	6.04258	6.016	6.06917	17548.6	515496	166284	1.08718e+06	63719.7			37		M273T6	y
99	1	4-nitro-5-piperazinothiophene-2-sulfonamide	2.50141	1.32274	4.02671	0.0172728	0.0607937	UP	293.037	293.037	293.037	6.43	6.4015	6.5475	16403.6	324216	131064	810998	163292			19		M293T6_1	y
100	0	Heptadecanoyl Ethanolamide	2.6506	1.40632	5.41769	0.0177416	0.0615044	UP	314.305	314.305	314.305	14.3687	14.347	14.3893	26921.9	261345	128460	692723	50178.2			32		M314T14	y
101	-	Unknown	3.37198	1.75359	3.8604	0.018685	0.0628717	UP	280.162	280.162	280.162	19.27	19.14	19.2745	7410.24	216388	152226	729657	172800	[23][M+1]+		23		M280T19	n
102	0	Heptadecanoyl Ethanolamide	66.7735	6.0612	7.14589	0.0189614	0.0632571	UP	314.305	314.305	314.305	20.2354	20.231	20.2398	2945.84	4758.39	1911.72	317734	75836.2			2		M314T20	y
103	1	Heptadecanoyl Ethanolamide	3.24122	1.69654	3.83747	0.0202202	0.0649326	UP	314.305	314.305	314.306	29.3471	29.1863	29.541	10784.2	295615	186543	958151	233720			34		M314T29_1	y
104	0	2,2-Dichloroethane-1-peroxol	91.4967	6.51565	6.82021	0.0204422	0.0652152	UP	130.966	130.966	130.966	23.6456	23.5892	23.702	4289.91	4380.24	6185.63	410512	102955			47		M131T24	y
105	1	3E,5E-tridecadienoic acid	3.12832	1.64539	6.79878	0.0207374	0.0655852	UP	211.169	211.169	211.169	12.942	12.8927	12.945	10714.1	116575	63144	364684	2842.29			33		M211T13	y
106	-	Unknown	2.90356	1.53782	3.78772	0.0208165	0.0656833	UP	141.958	141.958	141.958	5.7915	5.78867	5.835	21058.5	742367	501687	2.15551e+06	407290			39		M142T6	y
107	0	Pelargonic acid morpholide	33.1801	5.05225	6.49404	0.0212755	0.0662436	UP	228.196	228.196	228.196	25.7036	25.6897	25.7175	6838.28	18011.9	18766.3	601169	154400			35		M228T26	y
108	1	N,N-Dimethyldodecylamine-N-oxide	8.43253	3.07597	4.03511	0.0214915	0.0665021	UP	230.248	230.248	230.248	31.7967	31.7778	31.8155	3125.99	39053.5	67642.7	331115	105551			7		M230T32	y
109	-	Unknown	430.481	8.74981	6.66064	0.0218032	0.0668697	UP	122.964	122.964	122.964	15.1661	15.14	15.1922	6700.82	3157.77	1823.93	1.35936e+06	352665			22		M123T15	n
110	1	Cyclohexylcarbamodithioic acid--N,N-diethylethanamine (1/1)	2.33977	1.22637	4.0644	0.0224632	0.0676268	UP	277.177	277.177	277.177	14.5237	14.52	14.529	57984.2	599703	292876	1.40317e+06	177370	[21][M]+		30		M277T15	y
111	3	1,1,1,2-tetrachloro-2-fluoroethane	12.8097	3.67917	4.71871	0.022752	0.0679495	UP	184.888	184.888	184.889	19.27	19.14	19.2745	1682.73	23385.2	39842.3	300921	93758			23		M185T19	y
112	5	Rozenite (Fe(SO4).4H2O)	50.042	5.64507	6.423	0.022948	0.0681655	UP	224.935	224.935	224.935	15.5167	15.488	15.5453	3084.8	13372.3	10965.9	669177	176507			22		M225T16	y
113	1	Dodecanoic acid, ammonium salt	54.4973	5.76811	6.40489	0.0229846	0.0682055	UP	218.211	218.211	218.211	25.7036	25.6897	25.7175	2572.87	5644.39	5660.59	313402	83033.1			35		M218T26	y
114	7	(Prop-2-yn-1-yl)germane	125.621	6.97294	6.43499	0.0230306	0.0682559	UP	116.976	116.976	116.976	5.72425	5.657	5.7915	4063.9	3984.49	6901.34	527267	140678			24		M117T6	y
115	2	2-lauroleic acid	430.276	8.74912	6.47119	0.0230538	0.0682811	UP	199.169	199.169	199.169	11.9361	11.934	11.9382	5461.97	117.67	203.811	142188	38025.3			11		M199T12	y
116	3	2,2,3,4,4-Pentafluorobut-3-enenitrile	512.78	9.0022	6.41112	0.0234622	0.0687213	UP	158.003	158.003	158.003	13.5269	13.471	13.5828	9939.54	1457.43	2524.34	856454	230975			9		M158T14	y
117	1	1-Heptadecanamine, N,N-dimethyl-, acetate	100.751	6.65464	6.31213	0.0237279	0.0690024	UP	344.353	344.352	344.353	31.7267	31.638	31.8155	20249.5	22919.2	39697.2	2.33056e+06	631972	[36][M]+		7		M344T32	y
118	-	Unknown	8.04232	3.00761	4.12698	0.0243878	0.0696838	UP	280.161	280.161	280.161	12.2397	12.198	12.2897	14640.8	59138.1	83698.4	476464	153854	[22][M+1]+		27		M280T12	n
119	6	17,20-dimethyl Prostaglandin F1α	6.48146	2.69632	5.3007	0.0248016	0.0700989	UP	385.292	385.292	385.292	31.4322	31.3998	31.4647	4001.95	85410.4	147935	554963	40696			7		M385T31	y
120	-	Unknown	302.166	8.2392	6.19619	0.0250598	0.0703535	UP	122.964	122.964	122.964	23.6456	23.5892	23.702	2576.43	767.773	713.079	264143	73619.1			47		M123T24_1	n
121	0	1,1,1,2-tetrachloro-2-fluoroethane	3.74132	1.90355	3.52808	0.025478	0.0707586	UP	184.889	184.888	184.889	25.6438	25.388	25.7175	3202.31	172035	149008	644035	177457			35		M185T26	y
122	3	2,2-Difluorohexane	5.4778	2.4536	3.83452	0.0260645	0.0713123	UP	123.098	123.097	123.098	31.7267	31.638	31.8155	2402.38	51225.6	88725.4	281769	54517.8			7		M123T32	y
123	1	Discadenine	1.83701	0.877359	4.88841	0.0262875	0.0715186	UP	305.172	305.172	305.172	13.6973	13.669	13.717	31853.5	488104	137476	896652	45329			9		M305T14	y
124	0	D-erythro-Sphingosine (Sphingosine)	288.432	8.17209	6.02811	0.0263851	0.0716081	UP	286.274	286.274	286.274	23.4316	23.372	23.4912	12844	2944.04	5099.23	910529	260725			3		M286T23	y
125	0	Heptadecanoyl Ethanolamide	5.68186	2.50636	3.44215	0.026497	0.0717102	UP	314.305	314.305	314.306	31.7182	31.638	31.8155	9363.93	194707	337243	1.10751e+06	311822			7		M314T32	y
126	-	Unknown	409.897	8.67912	6.01068	0.0265573	0.071765	UP	275.277	275.277	275.277	14.5245	14.52	14.529	13916.4	2576.37	4462.41	1.14327e+06	328674			30		M275T15	n
127	0	Bis(benzyloxy)(methyl)phenylsilane	3.10462	1.63441	3.84571	0.0266711	0.071868	UP	335.146	335.146	335.146	9.36783	9.34983	9.388	4730.07	80004.1	65114.3	248382	38872.2			14		M335T9	y
128	0	Trimethyl(2-phenylpenta-1,3,4-trien-1-yl)silane	205.172	7.68069	5.96498	0.0268788	0.0720543	UP	215.125	215.125	215.125	25.7036	25.6897	25.7175	5464.57	2970.19	5144.53	653060	188696			35		M215T26	y
129	-	Unknown	1.66449	0.735083	5.32874	0.0271718	0.0723141	UP	339.345	339.345	339.345	30.2731	30.2083	30.3378	51488	643080	135558	1.0704e+06	30268.3	[34][M+1]+		17		M339T30	n
130	0	Dibutylamine, compd. with hexafluorophosphate	3.26657	1.70778	3.58551	0.027318	0.0724422	UP	275.123	275.123	275.123	13.5633	13.471	13.5828	7332.53	108371	96626.1	354002	68868.5			9		M275T14	y
131	0	3-Methylbenzoic acid	3.37906	1.75662	5.56672	0.0274978	0.0725987	UP	137.06	137.06	137.06	4.32508	4.29167	4.33	182410	8.36123e+06	980237	2.82531e+07	6.11112e+06			20		M137T4	y
132	0	Heptadecanoyl Ethanolamide	325.528	8.34664	5.88497	0.0276543	0.0727337	UP	314.305	314.305	314.305	23.2818	23.058	23.303	4164.25	822.453	1424.53	337000	98932.7			3		M314T23	y
133	1	Metazine	1593.98	10.6384	5.87014	0.0278147	0.0728709	UP	250.178	250.178	250.178	25.7036	25.6897	25.7175	52692	2864.04	2858.27	4.73482e+06	1.39621e+06	[15][M]+		35		M250T26	y
134	-	Unknown	6.55588	2.71279	3.44943	0.0283724	0.0734086	UP	462.327	462.327	462.327	31.7967	31.7778	31.8155	6078.78	77445.5	134140	509118	170262	[48][M+1]+		7		M462T32	n
135	0	2,6-Diaminopurine 2',3'-dideoxyriboside	3.23424	1.69342	3.71351	0.0285563	0.073583	UP	251.125	251.125	251.125	11.603	11.603	11.603	81542.4	731849	650153	2.36732e+06	398980			5		M251T12	y
136	1	2,2-Diphenyl-1-(trimethylsilyl)cyclopropane-1-carboxylic acid	2.51506	1.33059	3.3191	0.0294609	0.0744204	UP	311.146	311.146	311.146	9.69958	9.61567	9.7835	3535.32	78458.4	44648.9	197327	43061.8			16		M311T10	y
137	-	Unknown	5.26692	2.39696	3.74926	0.0294836	0.074441	UP	507.86	507.86	507.86	31.7267	31.638	31.8155	936.777	16557	28677.6	88325.1	16638.5			7		M508T32	n
138	-	Unknown	385.362	8.59007	5.61796	0.0302537	0.0751277	UP	720.606	720.606	720.606	31.7267	31.638	31.8155	1301.44	0	0	123000	37921.8			7		M721T32	n
139	1	1-Aminocycloundecane-1-carboxylic acid	1.90658	0.930987	4.98494	0.0305996	0.0754288	UP	214.18	214.18	214.18	9.653	9.61567	9.7835	26455	762569	54807	1.4539e+06	233871			16		M214T10	y
140	1	(2S,3R)-2-aminoheptadecane-1,3-diol	2.79905	1.48494	4.93896	0.0306068	0.0754351	UP	288.29	288.29	288.29	26.5978	26.5955	26.6002	108852	2.8584e+06	1.75161e+06	8.00078e+06	429053			25		M288T27	y
141	1	4-Octyloxyphenylboronic acid	2055.12	11.005	5.52761	0.0312046	0.075945	UP	251.181	251.181	251.181	21.4449	21.4275	21.4623	4975.02	0	0	655954	205540			44		M251T21	y
142	-	Unknown	3.44458	1.78433	3.7868	0.0312928	0.0760191	UP	337.852	337.851	337.852	23.6456	23.5892	23.702	903.839	21693.6	21397.1	74725.2	11425			47		M338T24	n
143	1	5-(4-benzylpiperazino)-1H-1,2,4-triazol-3-ylamine	4.81999	2.26903	4.86178	0.0313494	0.0760666	UP	259.166	259.166	259.167	14.3687	14.347	14.3893	2297.42	24378.3	32364	118016	8087.57			32		M259T14	y
144	0	Phytosphingosine	5040.91	12.2995	5.47857	0.0317392	0.0763904	UP	318.3	318.3	318.3	15.1661	15.14	15.1922	16251.2	365.39	632.875	2.91454e+06	921318			22		M318T15	y
145	1	Ethyl bromodifluoroacetate	170.384	7.41264	5.46734	0.0318146	0.0764524	UP	202.951	202.951	202.951	19.2722	19.27	19.2745	13032.3	14893.9	15078.7	2.5558e+06	804816			23		M203T19	y
146	0	2-{4-[(Ethylsulfanyl)methyl]phenyl}-4,4,5,5-tetramethyl-1,3,2-dioxaborolane	4.75964	2.25085	4.24459	0.0328134	0.0773122	UP	279.159	279.158	279.159	19.27	19.14	19.2745	41376.8	826708	445764	3.93483e+06	1.18738e+06	[23][M]+		23		M279T19	y
147	8	3-Fluoro-2-(hexadecyloxy)propan-1-ol	275.445	8.10562	5.3394	0.0333326	0.0777459	UP	319.303	319.303	319.303	23.4891	23.487	23.4912	2793.59	0	0	87916.9	28519.4			3		M319T23	y
148	0	Benzylamine, N,N-dioctyl-	1525.97	10.5755	5.2902	0.0339226	0.0782284	UP	332.331	332.331	332.331	31.3034	31.207	31.3998	28868.7	2623.1	4543.34	4.32749e+06	1.41599e+06			41		M332T31	y
149	0	Trimethyl(2-phenylpenta-1,3,4-trien-1-yl)silane	445.294	8.79861	5.26382	0.0342323	0.0784774	UP	215.125	215.125	215.125	19.27	19.14	19.2745	3100.04	1374.89	2381.37	706981	232166			23		M215T19_2	y
150	-	Unknown	77.6305	6.27855	5.24669	0.0342885	0.0785222	UP	110.009	110.008	110.009	5.81183	5.78867	5.835	6840.96	4679.25	4154.7	371512	121029			39		M110T6	n
151	0	3-Chloro-4-(ethylsulfanyl)-5-(2,4,6-trimethylphenyl)furan-2(5H)-one	3.56209	1.83272	4.85812	0.0347014	0.0788488	UP	297.071	297.071	297.071	6.06917	6.016	6.20383	11418.5	122613	20777	436760	110058			37		M297T6	y
152	1	Hexylamine	2.60094	1.37904	3.41426	0.0350502	0.0791209	UP	102.128	102.128	102.128	26.1337	26.1307	26.1367	87021.8	2.81509e+06	1.93305e+06	7.32189e+06	1.22085e+06			29		M102T26	y
153	-	Unknown	1.37178	0.456045	3.31752	0.0353101	0.0793212	UP	573.507	573.505	573.509	31.3034	31.207	31.3998	5371.96	473602	52025.8	649675	75788.1			41		M574T31	n
154	-	Unknown	5.6741	2.50439	4.57394	0.0361602	0.0799632	UP	622.506	622.505	622.506	31.3998	31.207	31.4647	1899.03	39275.6	68027.3	224061	16391.1			7		M623T31	y
155	-	Unknown	3.34386	1.74152	3.2422	0.0363126	0.0800763	UP	505.442	505.442	505.443	29.3511	29.285	29.4172	54680	379471	385656	1.2689e+06	277558			34		M505T29	n
156	0	Benzylamine, N,N-dioctyl-	26.2402	4.71371	4.96998	0.0365429	0.0802458	UP	332.331	332.331	332.331	29.34	29.277	29.403	24676.4	89753	81971.5	2.35514e+06	785226			34		M332T29	y
157	0	N-Cyclohexanecarbonylpentadecylamine	1.57407	0.654499	4.11322	0.0369277	0.0805259	UP	338.342	338.342	338.342	30.2731	30.2083	30.3378	204224	2.76072e+06	629398	4.34556e+06	221893	[34][M]+		17		M338T30	y
158	1	Methanol, (4,6-bis(bis(butoxymethyl)amino)-s-triazin-2-ylimino)di-	5.51162	2.46248	4.3461	0.0369951	0.0805746	UP	531.387	531.387	531.387	31.7267	31.638	31.8155	3640.55	96849.3	167748	534970	48448			7		M531T32	y
159	2	4-Amino-1-methyl-3-propyl-1H-pyrazole-5-carboxamide--hydrogen chloride (1/1)	1.48135	0.566914	3.06822	0.0374841	0.0809242	UP	219.101	219.101	219.101	8.049	7.98733	8.12217	29450.7	974658	182482	1.44381e+06	191944			6		M219T8	y
160	0	N,N-Dimethyldodecylamine-N-oxide	1.96231	0.97255	3.26839	0.0377644	0.0811218	UP	230.248	230.248	230.248	11.603	11.603	11.603	302322	3.03743e+06	1.28939e+06	5.96037e+06	858379			5		M230T12	y
161	-	Unknown	5.27164	2.39825	4.03167	0.0380834	0.0813443	UP	137.024	137.024	137.024	31.4322	31.3998	31.4647	3742.37	86674.5	150125	458038	54002.7	[3][M+1]+		7		M137T31	n
162	3	N,N-Dimethylaniline	1.69882	0.764531	3.07866	0.0382379	0.0814512	UP	122.096	122.096	122.096	29.0678	28.9792	29.1565	16231.9	1.17445e+06	351572	1.99517e+06	299332			12		M122T29	y
163	1	(3-Benzyl-1H-inden-1-yl)(trimethyl)silane	16.4608	4.04096	4.27401	0.0384483	0.0815958	UP	279.157	279.157	279.157	12.2397	12.198	12.2897	100423	156659	271342	2.58224e+06	944779	[22][M]+		27		M279T12	y
164	2	5-{[2-(6-Amino-9H-purin-9-yl)ethyl]amino}pentan-1-ol	3.09434	1.62963	3.52826	0.0388824	0.0818908	UP	265.178	265.178	265.178	14.5237	14.52	14.529	10713.1	108850	99500.1	336817	51223			30		M265T15	y
165	2	(1-Hydroxyethane-1,1-diyl)bis(phosphonate)	42.4471	5.40759	4.78372	0.0394628	0.0822783	UP	202.951	202.951	202.951	11.6704	11.603	11.7378	1130.28	1359.39	2354.52	66734.2	23553			5		M203T12	y
166	1	1-Dodecanamine acetate	51.0051	5.67257	4.76265	0.0400964	0.0826924	UP	246.243	246.242	246.243	25.7036	25.6897	25.7175	2084.05	3313.05	5738.38	179836	63939.7			35		M246T26	y
167	1	N,N-Dimethyldodecylamine-N-oxide	63.5635	5.99013	4.78456	0.0406553	0.0830505	UP	230.248	230.248	230.248	22.4746	22.465	22.4842	2208.6	3233.25	3585.69	212279	75591.4			36		M230T22	y
168	0	Stannanediamine	489.278	8.93451	4.75803	0.0414452	0.0835449	UP	152.947	152.947	152.947	5.81325	5.7915	5.835	2642.91	0	0	156168	56849.5			39		M153T6	y
169	0	Mannopine	4.09503	2.03387	3.39674	0.0415144	0.0835877	UP	311.146	311.146	311.146	11.934	11.9212	11.9382	7083.72	91868.5	68148	376204	127973			11		M311T12	y
170	0	Oxibendazole	697.932	9.44694	4.75252	0.0415354	0.0836006	UP	250.119	250.119	250.119	29.7499	29.7148	29.785	2392.66	0	0	222767	81187.1			21		M250T30	y
171	8	Mercury--palladium (2/1)	3.0571	1.61217	3.06057	0.0417416	0.0837272	UP	510.848	510.848	510.848	29.1243	29.105	29.1437	41354.1	278777	260353	852575	194072			12		M511T29	y
172	8	3-Fluoro-2-(hexadecyloxy)propan-1-ol	96.3229	6.58981	4.69632	0.0421445	0.083972	UP	319.303	319.303	319.303	19.3412	19.289	19.3933	3137.53	2185.67	3785.69	231026	84313.7			23		M319T19	y
173	2	2-carboxybenzenesulfonate	92.4673	6.53087	4.68942	0.0422395	0.0840292	UP	201.993	201.993	201.993	5.81325	5.7915	5.835	3486.21	2017.95	3495.19	206270	75360.2			39		M202T6	y
174	0	1,1,2,3-Tetrachloro-1,2,3,3-tetrafluoropropane	3.34551	1.74222	3.73745	0.0423197	0.0840774	UP	252.876	252.876	252.877	23.1818	23.058	23.1842	1913.21	59749.6	60573.6	200248	23882.3			3		M253T23	y
175	1	1-Dodecanamine acetate	255.038	7.99457	4.66855	0.0429263	0.0844378	UP	246.243	246.243	246.243	23.4891	23.487	23.4912	2174.87	340.684	590.083	141157	52239.9			3		M246T23	y
176	-	Unknown	458.486	8.84074	4.66037	0.0430885	0.084533	UP	259.283	259.283	259.283	31.3444	31.289	31.3998	1325.09	0	0	146340	54388.1			41		M259T31	n
177	9	Piperidine, 1-(3-(triethylsilyl)propyl)-, hydrochloride	1.67992	0.748395	3.13858	0.0431936	0.0845944	UP	278.209	278.209	278.209	14.3687	14.347	14.3893	53291.3	1.29441e+06	407828	2.17452e+06	263765			32		M278T14	y
178	3	4-Butoxy-1,1,1-trifluoro-4-methoxybutane	33.7605	5.07726	4.54249	0.0432234	0.0846117	UP	215.126	215.125	215.126	9.61567	9.60133	9.653	5211.02	9512.77	13128.4	324748	119480			16		M215T10	y
179	1	2,4,6-Trimethylacetophenone imine	98.7955	6.62637	4.55765	0.04477	0.0861832	UP	162.128	162.128	162.128	23.566	23.521	23.611	1245.3	391.847	678.698	59735.1	22542.1			47		M162T24	y
180	4	Ceriporic acid A	2.57089	1.36227	3.02848	0.0450322	0.0864445	UP	327.251	327.251	327.251	18.6615	18.578	18.745	8873.68	239949	176953	616882	123129			28		M327T19	y
181	-	Unknown	211.136	7.72203	4.52237	0.045526	0.0869325	UP	169.976	169.976	169.976	13.5172	13.471	13.5633	2701.65	955.242	1654.53	246613	94071.3			9		M170T14	y
182	-	Unknown	3.23323	1.69298	3.38712	0.0459048	0.0873034	UP	507.456	507.452	507.459	29.8157	29.785	29.8463	4052.66	66335.2	32628	214477	68367.5			21		M507T30	n
183	-	Unknown	1002	9.96867	4.43078	0.0473475	0.0886892	UP	122.964	122.964	122.964	11.603	11.603	11.603	8827.67	584.892	1013.06	799278	312218			5		M123T12	n
184	2	2-Allylphenol	11.3493	3.50453	4.38218	0.0476981	0.0890197	UP	135.08	135.08	135.08	4.32692	4.32383	4.33	80398.9	1.02141e+06	251986	1.15923e+07	4.1705e+06	[2][M]+		20		M135T4	y
185	0	Platydesminium	6.91839	2.79044	3.23508	0.0478121	0.0891266	UP	275.152	275.152	275.152	29.5211	29.5012	29.541	4416.93	50293.9	73763.8	348689	141711			8		M275T30	y
186	2	(9R,13R)-1a,1b-dihomo-jasmonic acid	34.6176	5.11343	4.27577	0.0478438	0.0891564	UP	239.164	239.164	239.164	12.2397	12.198	12.2897	20433.8	14232.7	24651.8	500068	195255			27		M239T12	y
187	1	(2E)-[2-(Methanesulfonyl)hydrazinylidene]acetic acid	23.1469	4.53275	4.27615	0.0487161	0.0899658	UP	167.012	167.012	167.013	11.7378	11.735	11.9382	3448.26	10109	9426.29	236455	91195.2			5		M167T12	y
188	-	Unknown	4.59895	2.20131	2.91037	0.0487233	0.0899724	UP	289.293	289.293	289.293	31.7182	31.638	31.8155	39139	1.01049e+06	1.75023e+06	4.6482e+06	1.27418e+06	[25][M+1]+		7		M289T32	n
189	0	Adenosine, 2-amino-3'-deoxy-	1.95292	0.96563	2.81171	0.0492598	0.0904629	UP	267.12	267.12	267.12	6.41575	6.4015	6.43	12543.9	224965	86784.5	439337	99535.1			19		M267T6	y
190	-	Unknown	1.4267	0.512685	2.86725	0.0497911	0.0909435	UP	540.435	540.434	540.437	29.2207	29.1565	29.285	1716.01	121587	25048.7	173468	18836			12		M540T29	n
191	7	3,4-Dihydro-3-thioxo-1,2,4-triazin-5(2H)-one	5422.66	12.4048	4.30689	0.0499089	0.0910493	UP	130.008	130.008	130.008	0.525167	0.525	0.529	8819.98	0	0	1.73081e+06	696060			31		M130T1	y
192	-	Unknown	1.71105	0.774883	2.8319	0.0512203	0.0922377	UP	245.194	245.194	245.194	10.1993	10.1837	10.215	44320.6	577065	151824	987388	199829	[14][M+1]+		13		M245T10_2	n
193	3	(2-Chloroethyl)carbamyl azide	3.42882	1.77771	4.11873	0.0523046	0.0931974	UP	149.023	149.023	149.023	19.27	19.14	19.2745	17672.8	503683	52525	1.72704e+06	511769			23		M149T19	y
194	0	1,1,1-Trifluorododec-11-en-2-one	9.9289	3.31163	3.78648	0.052379	0.0932625	UP	237.146	237.146	237.146	11.2184	11.1518	11.285	14618.7	70693.9	70354.2	702969	280535			1		M237T11	y
195	-	Unknown	1.59032	0.669314	2.95271	0.053044	0.0938404	UP	122.964	122.964	122.964	0.522333	0.446	0.525167	43117.4	4.76171e+06	858725	7.57262e+06	1.40762e+06			31		M123T1	n
196	7	1-(Octylselanyl)octane	5.08102	2.34512	3.26809	0.0531702	0.0939491	UP	307.188	307.188	307.188	15.1661	15.14	15.1922	17595.5	166491	145017	846485	329924			22		M307T15	y
197	-	Unknown	2374.83	11.2136	4.14778	0.0535036	0.0942354	UP	251.181	251.181	251.181	25.7036	25.6897	25.7175	7457.21	0	0	758001	316530	[15][M+1]+		35		M251T26	n
198	3	N,N-Diethylethanolamine	3.20257	1.67923	2.70617	0.0538334	0.0945167	UP	118.122	118.122	118.122	28.998	28.9792	29.0168	28951.4	672731	683389	2.15481e+06	657870			12		M118T29	y
199	8	Digitoxigenin	3.45553	1.78891	4.04195	0.0545275	0.095103	UP	375.25	375.25	375.25	23.8732	23.7993	23.9472	13514.8	180413	17529	623421	189027			47		M375T24	y
200	1	1-Iodo-10-undecene	1.89996	0.925965	3.25454	0.0546429	0.0951997	UP	281.076	281.076	281.076	7.39133	7.37767	7.405	9766.72	283763	53530.7	539137	124922			15		M281T7	y
201	0	D-erythro-Sphingosine (Sphingosine)	4.40537	2.13926	3.2423	0.0558019	0.0963783	UP	286.274	286.274	286.274	12.2397	12.198	12.2897	56752.4	332122	234304	1.46312e+06	556902			27		M286T12	y
202	2	Euparin	2.99244	1.58132	2.80933	0.0569624	0.0975382	UP	217.086	217.085	217.086	6.9945	6.942	6.99733	23984.6	361583	244966	1.08202e+06	370514			18		M217T7	y
203	-	Unknown	1084.11	10.0823	3.99767	0.0572519	0.0978245	UP	275.277	275.277	275.277	21.5492	21.4623	21.636	2819.8	0	0	346028	149922			43		M275T22	n
204	-	Unknown	2.04726	1.0337	3.28766	0.0574525	0.0980221	UP	289.293	289.293	289.293	28.9792	28.843	29.0168	36488.9	2.61183e+06	515415	5.34711e+06	1.34571e+06	[26][M+1]+		12		M289T29	n
205	8	Poly(glutamic acid-alanine)	3.92426	1.97242	3.27324	0.0581463	0.0987011	UP	237.11	237.11	237.11	9.61567	9.60133	9.653	62856.7	811555	447578	3.18475e+06	1.17332e+06			16		M237T10	y
206	6	Phenyl didecyl phosphite	2.02877	1.02061	3.19378	0.0601637	0.100637	UP	439.336	439.335	439.337	29.1243	29.105	29.1437	2177.28	55201.9	11290.3	111992	28654.4			12		M439T29	y
207	7	4-Phenylpiperidine	2.90267	1.53738	2.68529	0.0601929	0.100665	UP	162.127	162.127	162.127	28.998	28.9792	29.0168	4538.98	110845	109839	322056	80592.1			12		M162T29	y
208	5	Phosphoroselenoic acid	2.87277	1.52244	2.5866	0.0610474	0.101467	UP	162.907	162.907	162.907	30.612	30.5185	30.6325	5896.27	244621	211522	702738	222181			46		M163T31	y
209	-	Unknown	13.888	3.79577	3.53261	0.0620487	0.102395	UP	138.063	138.063	138.063	6.96825	6.942	6.9945	5913.46	19305.3	27124.9	269591	119681			18		M138T7	y
210	9	Dodecane-1-sulfonyl chloride	2.10646	1.07482	2.53897	0.0640696	0.104229	UP	269.136	269.136	269.136	31.3034	31.207	31.3998	8914.07	563730	298239	1.18748e+06	303500			41		M269T31	y
211	0	Benzoic acid, 4-amino-2-(benzyloxy)-, 3-piperidinopropyl ester, hydrogen phosphate	2.62391	1.39172	2.68078	0.0641981	0.104344	UP	467.194	467.194	467.194	14.5263	14.5237	14.529	80040.7	579790	507390	1.52132e+06	335572			30		M467T15	y
212	1	Trimethyl(2-phenylpenta-1,3,4-trien	688.202	9.42669	3.74558	0.0644631	0.10458	UP	215.125	215.125	215.125	13.6259	13.5828	13.669	2280.66	0	0	219661	101577			9		M215T14	y
213	0	Phytosphingosine	41.505	5.37521	3.68988	0.0645946	0.104697	UP	318.3	318.3	318.301	25.7036	25.6897	25.7175	12607.6	42139.6	72987.9	1.75783e+06	802042	[33][M]+		35		M318T26	y
214	0	Sodium cyclohexyl succinate	3.08079	1.6233	2.57814	0.0651247	0.105166	UP	223.094	223.094	223.094	7.405	7.37767	7.59033	47500.7	789667	677708	2.43279e+06	871368			15		M223T7	y
215	9	Dilauryl tartrate	5.27501	-2.39917	-3.09185	0.0652823	0.105304	DOWN	487.395	487.394	487.395	29.7028	29.6908	29.7148	8124.91	205384	87032.3	38828.9	33630.6			21		M487T30	y
216	0	Dicyclohexyl[3-(trimethylstannyl)pr	3.27495	1.71147	2.58266	0.0656135	0.105595	UP	405.173	405.173	405.173	5.81325	5.7915	5.835	39065.2	161807	196813	529910	149024			39		M405T6	y
217	8	Methoprene	4.27464	2.0958	2.55742	0.0659377	0.105878	UP	311.256	311.256	311.256	23.6565	23.611	23.702	2142.65	28299.5	39227.4	121425	49387.3			47		M311T24	y
218	-	Unknown	4.33254	2.11521	2.51062	0.0669871	0.106796	UP	759.222	759.222	759.222	31.4322	31.3998	31.4647	4643.6	63822.8	110544	277437	97457.1			7		M759T31	y
219	-	Unknown	4.36609	2.12634	2.48819	0.0680401	0.107703	UP	546.479	546.478	546.482	31.3998	31.289	31.4647	2556.59	58054.8	100554	254402	92574.5			7		M546T31	n
220	5	1,1,1-Trifluorododec-3-yn-2-one	12.07	3.59335	3.21657	0.0684693	0.108069	UP	235.132	235.131	235.132	23.4891	23.487	23.4912	5874.97	7985.86	13831.9	98957.2	46992.7			3		M235T23	y
221	2	2-carboxybenzenesulfonate	117.388	6.87514	3.58348	0.0697549	0.109154	UP	201.993	201.993	201.993	19.3559	19.289	19.4228	3374.97	5405.54	5263.22	634546	304045			23		M202T19	y
222	0	Echiguanine B	6.36316	2.66974	2.98635	0.0723968	0.111325	UP	251.125	251.125	251.125	9.34983	9.20183	9.388	88295.6	263097	280721	1.67413e+06	768733			14		M251T9	y
223	5	Polyporusterone E	2.62103	1.39013	2.505	0.0729611	0.111779	UP	461.324	461.324	461.324	31.6873	31.638	31.8155	20089.3	844650	770503	2.21413e+06	550424	[48][M]+		7		M461T32	y
224	8	Trifluoro(methyltellanyl)methane	160.958	7.33054	3.48182	0.0734499	0.11217	UP	214.93	214.93	214.931	21.7362	21.636	21.8365	1395.2	689.935	1195	145300	71927.4			43		M215T22	y
225	3	Oxaziridine-2-sulfonic acid	2391.91	11.2239	3.4674	0.074054	0.112649	UP	125.986	125.986	125.986	5.7915	5.78867	5.835	18122.9	635.996	1101.58	2.03021e+06	1.01382e+06			39		M126T6	y
226	3	Benzyl thiocyanate	2.2277	1.15556	2.42608	0.0744255	0.112942	UP	150.037	150.037	150.037	29.1863	29.1565	29.277	14490.5	448441	251185	998993	302323			12		M150T29	y
227	9	Dipentyl phthalate	4.72334	2.23981	2.411	0.0753513	0.113665	UP	307.188	307.188	307.188	25.7036	25.6897	25.7175	2007.81	45899.9	79501	217806	94504			35		M307T26	y
228	-	Unknown	4.05764	2.02064	2.83752	0.075887	0.11408	UP	506.354	506.354	506.354	31.7778	31.7182	31.8155	3695.13	92946.9	160989	378008	66030.6	[50][M+1]+		7		M506T32	n
229	5	PGE1 Alcohol	1.90274	0.928075	2.41148	0.0801246	0.117264	UP	341.267	341.267	341.267	20.5441	20.4942	20.594	12917.7	332775	175483	633183	125546			38		M341T21	y
230	2	O,O-Dipropyl amino(imino)methylamidothiophosphate	2.0406	1.02899	2.58983	0.0806293	0.117632	UP	240.092	240.092	240.093	5.11283	5.04733	5.11567	16376.1	747786	241048	1.52593e+06	461223			42		M240T5	y
231	-	Unknown	3.89764	1.9626	2.48579	0.0807437	0.117716	UP	619.577	619.577	619.578	31.7267	31.638	31.8155	1943.2	46292.3	80180.7	181260	49144.4			7		M620T32	n
232	1	2-Butylaminoadenine	1.55807	0.639762	2.36307	0.0813938	0.118186	UP	207.135	207.135	207.136	10.1837	10.1823	10.215	10664.1	344659	111357	537004	86461.6			13		M207T10	y
233	1	Xestoaminol C	5.30539	2.40746	2.81561	0.0815246	0.11828	UP	230.248	230.247	230.248	29.34	29.277	29.403	3005.95	49594.4	45404.1	263682	123624			34		M230T29	y
234	0	N-(9beta-D-2'-Deoxyribofuranosylpurin-6-yl)glycinamide	2.50326	1.32381	2.48025	0.0816916	0.1184	UP	309.131	309.131	309.131	10.183	10.1823	10.1837	13863.9	354507	318278	887423	192868			13		M309T10	y
235	0	Cyclopentanone, 2-(2-iodoethyl)-2-	2.21672	1.14842	2.3193	0.0816958	0.118403	UP	295.055	295.055	295.055	6.1365	6.06917	6.20383	23506.6	358895	240405	795568	220344			37		M295T6	y
236	-	Unknown	886.769	9.79241	3.25431	0.082857	0.11923	UP	275.277	275.277	275.277	19.205	19.14	19.27	3092.62	179.364	310.667	347748	184987			23		M275T19_2	n
237	3	Benzylamine	3.58606	1.8424	2.94745	0.0831872	0.119463	UP	108.08	108.08	108.08	29.0678	28.9792	29.1565	30599.9	967989	390977	3.47127e+06	1.41813e+06			12		M108T29	y
238	0	Trimethyl(2-phenylpenta-1,3,4-trien-1-yl)silane	3061.23	11.5799	3.23984	0.0835087	0.119689	UP	215.125	215.125	215.125	31.3444	31.289	31.3998	9603.79	0	0	977088	522360			41		M215T31	y
239	2	1-(3-Phenoxyphenyl)piperazine	17.3379	4.11586	3.19349	0.0835637	0.119727	UP	255.15	255.15	255.15	25.7036	25.6897	25.7175	3481.25	18578.6	16115.2	323958	164843			35		M255T26	y
240	5	Dehydrongaione	102.233	6.67571	3.23108	0.0837225	0.119839	UP	249.147	249.147	249.147	26.7153	26.7	26.7307	3630.72	2069.12	3583.83	233286	123894			25		M249T27	y
241	7	1-(Octylselanyl)octane	4.16551	2.05849	3.15906	0.0852114	0.120871	UP	307.188	307.187	307.188	13.5633	13.471	13.5828	5283.8	104995	181856	438244	17678.1			9		M307T14_2	y
242	0	Benzoic acid, 4-(1-carboxycyclopropyl)-2,3,5-trifluoro-, 1-ethyl ester	2.05017	1.03574	2.55641	0.0866955	0.121882	UP	289.068	289.068	289.068	5.657	5.4285	5.669	117771	1.96823e+06	1.26056e+06	4.03519e+06	610096			24		M289T6	y
243	5	Bromo(chloro)phenylthallane	77.5105	6.27632	3.13311	0.0883093	0.122961	UP	396.906	396.906	396.906	23.6456	23.5892	23.702	967.766	847.587	1468.06	82190.2	44943.9			47		M397T24	y
244	-	Unknown	97.2479	6.60359	3.09899	0.0900601	0.124108	UP	224.936	224.936	224.936	5.81325	5.7915	5.835	3081.14	2030.99	3517.77	218202	120768			39		M225T6_1	y
245	1	Lupinate	4.00742	2.00267	2.97611	0.0904312	0.124348	UP	307.152	307.151	307.152	13.693	13.669	13.717	5049.71	72490.5	125557	291352	21439			9		M307T14_1	y
246	1	Sodium oxalate	53.9757	5.75424	3.08552	0.0907563	0.124558	UP	134.966	134.966	134.966	15.5111	15.488	15.5342	7257.59	24626.7	20687.6	1.32924e+06	732052			22		M135T16	y
247	1	1-Dodecanamine acetate	64.1133	6.00255	3.08263	0.0909594	0.124688	UP	246.243	246.243	246.243	14.7601	14.744	14.7762	2279.9	2914.28	2525.01	193665	107148			4		M246T15	y
248	0	Difluorotriphenylphosphorane	5.68959	2.50833	2.75441	0.0915707	0.125079	UP	301.095	301.095	301.096	7.39133	7.37767	7.405	5177.25	40422.2	35025.4	230591	114339			15		M301T7	y
249	1	N-[2-Bromo-2-(morpholine-4-sulfonyl)ethyl]-2-methylpropan-2-amine	3.14724	1.65409	2.76832	0.0915818	0.125086	UP	329.053	329.053	329.053	10.784	10.7832	10.859	97263.2	818386	1.05403e+06	2.57599e+06	313541			26		M329T11	y
250	-	Unknown	1.46028	0.546241	2.5509	0.091858	0.125262	UP	275.278	275.277	275.278	11.603	11.603	11.603	177334	2.11416e+06	605377	3.08726e+06	264734	[20][M+1]+		5		M275T12	n
251	-	Unknown	19.3269	4.27254	2.94374	0.0928868	0.125911	UP	333.334	333.334	333.334	29.2103	29.1437	29.277	6900.87	24401	42263.7	475707	262156			12		M333T29	n
252	0	Sodium isooctyl phthalate	7.30135	2.86816	2.82984	0.0936635	0.126397	UP	301.141	301.141	301.141	25.7036	25.6897	25.7175	4061.38	78150.8	69272.9	571384	293836			35		M301T26	y
253	-	Unknown	4.34712	2.12006	2.19679	0.0943805	0.126841	UP	487.394	487.394	487.394	31.4322	31.3998	31.4647	4689.12	96273.1	166750	419436	192653			7		M487T31	y
254	-	Unknown	3.92697	1.97342	2.18418	0.0951517	0.127314	UP	649.537	649.537	649.537	31.4322	31.3998	31.4647	10742.5	306062	530114	1.20273e+06	473901			7		M650T31	y
255	0	Benzeneacetic acid, sodium salt	3.23236	1.69259	2.92184	0.0959493	0.1278	UP	159.042	159.042	159.042	4.32692	4.32383	4.33	17764.4	415849	72174.5	1.34417e+06	545551			20		M159T4	y
256	4	Sintaxanthin	1.68805	0.755355	2.17751	0.0967847	0.128304	UP	431.333	431.332	431.333	31.3034	31.207	31.3998	4490.87	210881	74733.7	355977	87949.4			41		M431T31	y
257	0	Sodium isooctyl phthalate	1.89182	0.919772	2.32456	0.0967979	0.128311	UP	301.141	301.141	301.141	19.27	19.14	19.2745	155291	6.66495e+06	2.22726e+06	1.26089e+07	3.82807e+06			23		M301T19	y
258	1	Carbocyclic-3'-amino-adenosine	3.15255	1.65652	2.85465	0.0970092	0.128438	UP	265.141	265.141	265.141	10.784	10.7832	10.859	107178	1.09946e+06	1.41426e+06	3.46644e+06	249848			26		M265T11	y
259	-	Unknown	6.34559	2.66576	2.90083	0.0970529	0.128464	UP	122.964	122.964	122.964	5.746	5.657	5.835	13879.3	133820	56887.4	849166	423319			24		M123T6	n
260	-	Unknown	1.6023	0.680143	2.37497	0.0978877	0.128961	UP	666.604	666.604	666.605	29.34	29.277	29.403	5788.77	216839	43905.7	347441	84524			34		M667T29	n
261	10	O-Desmethylvenlafaxine	1.97253	0.980047	2.33552	0.0989918	0.129612	UP	264.193	264.193	264.193	12.9435	12.942	12.945	19879	427888	270919	844022	147793			33		M264T13_2	y
262	-	Unknown	1.88633	0.915584	2.49832	0.0992379	0.129756	UP	337.854	337.854	337.855	31.3034	31.207	31.3998	1535.41	110192	62730.3	207859	25489.5			41		M338T31	n
263	0	4-Methoxybenzaldehyde	210.244	7.71592	2.92001	0.0999969	0.130197	UP	137.06	137.06	137.06	15.5111	15.488	15.5342	24165.1	21695.3	6714.27	4.5613e+06	2.69273e+06			22		M137T16	y
264	1	1-Dodecanamine acetate	136.329	7.09094	2.91688	0.100106	0.13026	UP	246.242	246.242	246.242	29.2103	29.1437	29.277	2710.54	1091.53	1890.59	177816	104922			12		M246T29	y
265	1	Sodium capryloyl glycinate	2.0305	1.02184	2.12427	0.10111	0.130838	UP	252.157	252.157	252.157	6.06917	6.016	6.20383	50170	620650	357401	1.26023e+06	379759			37		M252T6	y
266	0	2-(Diphenylmethyl)thiophene	2.10541	1.0741	2.29214	0.10127	0.130929	UP	251.089	251.089	251.089	4.9335	4.93267	4.93433	6062.13	442864	322005	932412	182094			42		M251T5	y
267	0	N,N'-Bisacrylylcystamine	2.97985	1.57524	2.14498	0.102583	0.131673	UP	261.072	261.072	261.073	5.41542	5.405	5.42583	1856.91	64053.9	63165.9	191188	80926.4			10		M261T5	y
268	0	1,1,1,2-tetrachloro-2-fluoroethane	2.71752	1.44229	2.1337	0.102648	0.13171	UP	184.889	184.888	184.89	23.1288	23.058	23.303	2954.25	94735.6	83489.1	257735	102651			3		M185T23	y
269	2	2-[(Octadecanoylcarbamothioyl)amino]benzoic acid	5.56302	2.47587	2.49306	0.102661	0.131717	UP	463.298	463.298	463.298	15.1661	15.14	15.1922	13771.3	90823.4	102158	505844	269631			22		M463T15	y
270	-	Unknown	1.97529	0.982062	2.31	0.10312	0.131975	UP	700.645	700.645	700.646	30.6223	30.5185	30.8628	3136.27	204152	132072	403259	69605.5			46		M701T31	n
271	1	Guanosine, 3'-amino-2',3'-dideoxy-	4.68585	2.22831	2.62402	0.10382	0.132364	UP	267.12	267.12	267.12	11.2184	11.1518	11.285	8146.05	103526	66469.7	485108	242944			1		M267T11_1	y
272	5	Glycine, N-(2-(bis(carboxymethyl)amino)ethyl)-N-(hydroxymethyl)-	1.74187	0.800634	2.10151	0.103978	0.132452	UP	265.104	265.104	265.104	6.1365	6.06917	6.20383	20171.1	329598	136308	574116	148440			37		M265T6	y
273	2	Butoxy(dibutyl)indigane	2.9701	1.57051	2.80462	0.10428	0.132619	UP	303.118	303.118	303.118	10.1993	10.1837	10.215	1410.44	38615.6	46700.5	114692	5142.74			13		M303T10	y
274	1	1-Iodoundeca-1,5-diene	1.40231	0.4878	2.1436	0.104712	0.132858	UP	279.06	279.06	279.06	6.96967	6.942	6.99733	13791.4	276396	72334	387592	53294.4			18		M279T7	y
275	-	Unknown	1.67725	0.746094	2.23402	0.105524	0.133302	UP	564.608	564.608	564.608	29.34	29.277	29.403	1309.97	61951.6	16382.4	103908	28102.7			34		M565T29	n
276	1	N-Undecanoylglycine	1.26785	0.342389	2.08349	0.105636	0.133363	UP	244.191	244.191	244.191	10.1837	10.1823	10.215	322738	5.03394e+06	784184	6.38231e+06	800950	[14][M]+		13		M244T10	y
277	2	4-n-dodecyloxyaniline	9.0589	3.17934	2.69563	0.107938	0.134659	UP	278.248	278.248	278.249	20.1543	20.1218	20.1868	2521.79	17761.5	15426.5	161863	91297.1			2		M278T20	y
278	2	Guanidine, 1-tert-butyl-2-cyano-3-(1-ethyl-3-methyl-5-pyrazolyl)-	6.26886	2.6482	2.29507	0.109017	0.135257	UP	249.183	249.183	249.183	15.5111	15.488	15.5342	12495	111253	192697	698766	399323			22		M249T16	y
279	0	1-(3-Phenoxyphenyl)piperazine	1.86817	0.901622	2.3167	0.109073	0.135288	UP	255.149	255.149	255.149	6.9945	6.942	6.99733	151185	1.59614e+06	940404	2.98185e+06	434685	[17][M]+		18		M255T7	y
280	6	Dodecanoic acid, 1-oxo-2-(2,4,6-trimethylphenyl)-1H-inden-3-yl ester	3.51742	1.81452	2.37114	0.110021	0.135807	UP	447.287	447.287	447.287	29.1243	29.105	29.1437	3741.49	59772	41437.5	210243	101805			12		M447T29	y
281	7	N-Oleoyl Glycine	49.0418	5.61594	2.752	0.110218	0.135914	UP	340.282	340.282	340.282	26.3008	26.2375	26.364	4032.07	8019.3	9390.83	398498	245580			29		M340T26	y
282	1	3,6,9-Trioxa-12-azatetracosan-1-ol	1.85758	0.893427	2.04933	0.110535	0.136087	UP	362.327	362.327	362.327	11.9276	11.9212	11.934	447610	5.58552e+06	2.70913e+06	1.03756e+07	3.0084e+06			11		M362T12	y
283	6	Glyceryl lactooleate	1.46495	0.550854	2.02698	0.112619	0.137205	UP	429.319	429.319	429.319	20.1543	20.1218	20.1868	10049.7	319831	90623.1	468537	89072.6			2		M429T20	y
284	5	N2-Galacturonyl-L-lysine	7.10235	2.8283	2.57604	0.112662	0.137227	UP	323.146	323.146	323.147	11.7367	11.735	11.7378	12418.4	121530	106580	863150	487119			5		M323T12	y
285	5	beta-Alanine, N-(4-hydroxybutyl)-N	2.12303	1.08612	2.06212	0.113266	0.137547	UP	247.13	247.13	247.13	9.63433	9.61567	9.653	8332.16	194810	111031	413587	146423			16		M247T10	y
286	-	Unknown	4.88877	2.28947	2.1403	0.113618	0.137732	UP	123.097	123.096	123.097	23.566	23.521	23.611	749.484	4436.82	7684.79	22730.9	12653.8			47		M123T24_2	n
287	4	4-chloropteridine	102.612	6.68105	2.66249	0.116803	0.13938	UP	167.013	167.012	167.013	23.6456	23.5892	23.702	2317.22	1475.23	1478.69	162293	104607			47		M167T24	y
288	7	N-Acetyl-b-glucosaminylamine	2.58632	1.3709	2.45902	0.117328	0.139647	UP	221.115	221.115	221.115	7.37767	7.29183	7.405	26314.2	565577	164279	1.46276e+06	610219			15		M221T7	y
289	-	Unknown	1.49186	0.577116	2.0789	0.117912	0.139941	UP	665.562	665.561	665.562	31.3034	31.207	31.3998	2090.06	187361	41636.6	279517	64511.1			41		M666T31	y
290	1	1,3,5-Tripropoxybenzene	2.01734	1.01245	2.24029	0.118832	0.140403	UP	253.18	253.179	253.18	13.6973	13.669	13.717	17381.9	209355	150580	422340	66638.9			9		M253T14	y
291	0	Adenosine, 2',3'-dideoxy-2'-(1-piperidinyl)-	16.9159	4.08031	2.55521	0.118922	0.140448	UP	319.188	319.188	319.188	15.1661	15.14	15.1922	27403.2	52114.8	90265.4	885167	557424			22		M319T15	y
292	-	Unknown	5.96996	2.57772	2.19188	0.119078	0.140526	UP	544.462	544.462	544.463	31.7967	31.7778	31.8155	2864.22	46998.3	81403.5	281849	166775			7		M544T32	y
293	2	1-Phenoxy-2,3-ditetradecylbenzene	3.51076	1.81178	2.44732	0.121195	0.14157	UP	563.517	563.515	563.52	31.3034	31.207	31.3998	3062.95	117275	203125	412469	48860.1			41		M564T31	y
294	2	N-(Phenylacetyl)isoleucine	3.06007	1.61356	2.48965	0.121463	0.1417	UP	250.143	250.143	250.144	10.8215	10.784	10.859	5724.72	34369.3	48321.6	105172	9557.53			26		M250T11_1	y
295	3	Tetradecanamide	2.02861	1.02049	2.03782	0.122518	0.142211	UP	228.233	228.233	228.233	19.205	19.14	19.27	10355.8	238530	174630	483884	113987			23		M228T19	y
296	5	Chlorotridodecylstannane	2.59853	1.37769	1.95109	0.123008	0.142447	UP	663.462	663.462	663.462	21.0986	21.025	21.1722	11719.7	153846	150170	399774	158468			50		M663T21	y
297	4	N-Octadecyl-N'-[3-(trimethoxysilyl)propyl]urea	3.43072	1.77851	2.02259	0.123065	0.142474	UP	475.395	475.392	475.395	31.207	31.0888	31.3998	2516.41	97100.7	168183	333855	113226			41		M475T31	y
298	-	Unknown	1.65972	0.730936	1.99641	0.123296	0.142585	UP	414.326	414.326	414.326	23.6001	23.5892	23.611	4152.64	86395.7	40001.4	143392	29070.8	[45][M+1]+		47		M414T24	n
299	-	Unknown	4.22016	2.0773	1.97658	0.12393	0.142887	UP	578.539	578.538	578.54	31.3444	31.289	31.3998	1712.04	39187.8	67875.3	166277	88291.9			41		M579T31	n
300	-	Unknown	1.49039	0.575694	1.97954	0.124081	0.142959	UP	787.634	787.627	787.64	31.3034	31.207	31.3998	1526.25	122102	41782	181980	31609.8			41		M788T31	y
301	0	1-Heptadecanamine, N,N-dimethyl-, acetate	10.8291	3.43684	2.46909	0.124333	0.143078	UP	344.352	344.352	344.352	29.34	29.277	29.403	18018.5	117912	147301	1.27687e+06	799548			34		M344T29	y
302	0	Trimethyl(2-phenylpenta-1,3,4-trien	7.982	2.99675	2.39846	0.125008	0.143397	UP	215.125	215.125	215.125	29.1437	28.9792	29.277	9093.4	124406	150024	993857	609688			12		M215T29	y
303	1	(4-Chlorophenylethynyl)trimethylsilane	1.62626	0.701562	2.10283	0.125111	0.143445	UP	209.055	209.055	209.055	9.62717	9.60133	9.653	23370	385460	175775	626859	92945.1			16		M209T10	y
304	1	Stannanediamine	1048.67	10.0343	2.55385	0.125176	0.143476	UP	152.947	152.947	152.947	14.5245	14.52	14.529	2448.45	258.704	448.089	494439	335159			30		M153T15	y
305	0	N-Stearylbenzylamine	1.71594	0.779001	2.35504	0.128546	0.145909	UP	360.363	360.361	360.363	18.6984	18.578	18.9107	90669.7	3.14118e+06	1.60418e+06	5.39009e+06	402869			28		M360T19	y
306	8	Hydroxyproline palmitamide	2.82366	1.49757	1.98222	0.131587	0.148064	UP	370.298	370.298	370.299	29.2103	29.1437	29.277	1196.44	38009.4	32283.3	107325	51247.2			12		M370T29	y
307	5	18-fluoro-octadecanoic acid	2.6311	1.39567	1.8896	0.13223	0.148515	UP	303.271	303.27	303.271	23.6605	23.521	23.7993	732.814	16081.5	16512.4	42592.1	17828.2			47		M303T24	y
308	4	TG(12:0/12:0/17:2(9Z,12Z))[iso3] (Triacylglycerol)	2.11011	1.07732	1.90738	0.132335	0.148589	UP	705.6	705.6	705.601	29.2168	28.9792	29.403	12067.2	353425	277364	745768	223612			12		M706T29	y
309	1	4-Biphenylamine	1.49364	0.578832	2.3663	0.13317	0.149172	UP	170.096	170.096	170.097	29.1714	29.1565	29.1863	14718.6	903626	320796	1.34969e+06	60790.5			12		M170T29	y
310	-	Unknown	1.75323	0.810018	2.35634	0.133601	0.149471	UP	592.557	592.557	592.558	30.6223	30.612	30.6325	1978.52	102287	55580.1	179333	10872.6			46		M593T31	n
311	10	Lophocerine	294.951	8.20433	2.43798	0.134993	0.150434	UP	250.178	250.178	250.178	18.6615	18.578	18.745	41812.1	22703	19661.4	6.72766e+06	4.76347e+06			28		M250T19	y
312	0	4-(Diphenylmethylidene)-3-(trimethylsilyl)oxetan-2-one	1.58563	0.66506	2.07228	0.135075	0.150491	UP	309.131	309.131	309.131	11.934	11.9212	11.9382	30906.5	491775	102241	779775	217925			11		M309T12_1	y
313	-	Unknown	1.35255	-0.43568	-1.87945	0.135358	0.150685	DOWN	613.534	613.534	613.535	28.4879	28.4783	28.4975	1588.83	160778	24923.6	118870	29502.4			49		M614T28	y
314	-	Unknown	1.46948	-0.555306	-2.2643	0.137664	0.152362	DOWN	575.412	575.412	575.413	28.4975	28.4783	28.6255	6783.06	326321	77364.3	222066	19356.4			49		M575T28	n
315	-	Unknown	48.4147	5.59737	2.38968	0.139126	0.153415	UP	641.837	641.837	641.837	23.6456	23.5892	23.702	569.327	435.729	754.705	31397.7	22428.7			47		M642T24	y
316	0	Decylamine, acetate	258.953	8.01655	2.39243	0.139138	0.153423	UP	218.211	218.211	218.212	19.2745	19.27	19.289	2271.42	1102.2	1909.07	340520	245721			23		M218T19	y
317	3	3-(11-Cyclohexylundecyl)-3-hydroxypentanedioic acid	1.67991	0.748384	2.31327	0.141269	0.155056	UP	385.294	385.293	385.295	23.0757	22.942	23.2818	2317.14	124398	62615.8	208977	9473.57			3		M385T23	y
318	7	N-Oleoyl Glycine	1.58121	0.661029	2.31201	0.144406	0.157432	UP	340.282	340.282	340.283	11.7367	11.735	11.7378	83286.1	818676	354658	1.2945e+06	35842.6			5		M340T12	y
319	5	Phosphoroselenoic acid	2.3286	1.21946	2.25694	0.147797	0.159964	UP	162.907	162.907	162.907	24.5438	24.463	24.6638	6443.27	382190	385900	889967	54182			53		M163T25	y
320	1	DL-Alanine, N,N'-(1,4-dioxo-1,4-butanediyl)bis-	2.1787	1.12347	2.25077	0.152017	0.163065	UP	261.108	261.108	261.108	9.61567	9.60133	9.653	10592.8	212870	13602.7	463780	192605			16		M261T10	y
321	1	Cyanamide, [4,6-bis[(1-methylethyl)amino]-1,3,5-triazin-2-yl]-	1.40491	0.490475	1.78813	0.155323	0.165457	UP	236.162	236.162	236.162	9.653	9.61567	9.7835	215370	5.82559e+06	1.85234e+06	8.18441e+06	1.33767e+06			16		M236T10	y
322	5	Protobassic acid	2.08967	1.06328	1.91524	0.157198	0.166798	UP	505.35	505.347	505.35	31.748	31.6873	31.8155	11139.9	550790	492736	1.15119e+06	228109	[50][M]+		7		M505T32	y
323	1	1,1'-(Decane-1,10-diyl)bis(2-amino-1,5-dihydro-4H-imidazol-4-one)	10.2604	3.35902	2.17675	0.157307	0.166875	UP	337.235	337.235	337.235	14.3682	14.347	14.3893	60596.7	111949	105844	1.14865e+06	818087			32		M337T14_2	y
324	5	Polyporusterone E	1.73263	0.792963	2.18178	0.158777	0.167919	UP	461.324	461.324	461.324	22.4746	22.465	22.4842	14957.3	270380	14295.9	468468	156605			36		M461T22	y
325	-	Unknown	1.73767	-0.797156	-1.78148	0.16103	0.169507	DOWN	505.345	505.339	505.35	28.4879	28.4783	28.4975	3174.67	212272	47817.8	122159	73412.5			49		M505T28	y
326	2	3,3'-(Dodecane-1,12-diyl)bis(N,N-d	2.07619	-1.05394	-1.76378	0.161114	0.169566	DOWN	393.298	393.298	393.298	29.4592	29.4115	29.541	705256	7.62676e+06	2.21834e+06	3.67334e+06	3.18611e+06	[43][M]+		8		M393T29	y
327	0	Nonadecan-10-amine	3.47643	1.79761	1.98514	0.162043	0.170216	UP	284.331	284.331	284.331	29.34	29.277	29.403	3383.1	68103.7	46590.6	236758	139582			34		M284T29	y
328	4	S-Phosphocysteine	6.54123	2.70956	1.94555	0.162976	0.170866	UP	201.993	201.992	201.993	0.459833	0.446	0.525167	3652.92	98388.7	170414	644974	455788			31		M202T0	y
329	0	1-Dodecanamine acetate	2.54929	1.35009	1.92114	0.163743	0.171399	UP	246.243	246.243	246.243	9.36783	9.34983	9.388	242195	2.78932e+06	1.44044e+06	7.11077e+06	3.62005e+06			14		M246T9	y
330	1	Phytosphingosine	1.40211	0.487597	2.06174	0.164795	0.172127	UP	318.301	318.3	318.301	11.7367	11.735	11.7378	480437	5.18366e+06	1.71314e+06	7.26805e+06	362518	[32][M]+		5		M318T12	y
331	0	Lupinate	2.52747	1.33769	2.12707	0.166007	0.172962	UP	307.151	307.151	307.152	11.1491	11.025	11.285	8473.97	255940	317773	647151	22361.5			1		M307T11	y
332	1	Methyl jasmonate	2.31682	1.21214	2.04509	0.166307	0.173168	UP	225.148	225.148	225.148	10.784	10.7832	10.859	21157.1	312299	340270	723539	74320.1			26		M225T11	y
333	5	Rhapontigenin	1.72857	0.789582	2.0268	0.166814	0.173516	UP	259.095	259.095	259.095	7.39133	7.37767	7.405	15767.1	325180	46870.8	562097	196963			15		M259T7	y
334	0	2-bromo-2,2-difluoro-N-(2-hydroxyphenyl)acetamide	67.9755	6.08694	2.09512	0.171052	0.176393	UP	265.962	265.962	265.963	23.6565	23.611	23.702	1724.85	1532.65	1805.23	111415	90822.4			47		M266T24	y
335	-	Unknown	1.44324	0.529311	2.03062	0.172744	0.177528	UP	319.304	319.304	319.304	11.7367	11.735	11.7378	91292.5	974806	363599	1.40688e+06	60168.4	[32][M+1]+		5		M319T12	n
336	1	1,1,1,2-tetrachloro-2-fluoroethane	3.05448	1.61093	1.69184	0.174687	0.178822	UP	184.889	184.889	184.889	30.5135	30.3378	30.5185	3771.81	171362	296807	524070	205653			46		M185T31	y
337	6	3-(11-Cyclohexylundecyl)-3-hydroxypentanedioic acid	1.38096	0.465674	1.88749	0.175416	0.179304	UP	385.293	385.292	385.293	20.2354	20.1868	20.4943	8787.66	386946	43681.6	534357	128025			2		M385T20	y
338	5	5,12-Naphthacenedione, 8-ethyl-7,8,9,10-tetrahydro-1,6,8,11-tetrahydroxy-7-((2,3,6-trideoxy-3-(dimethylamino)-alpha-L-lyxo-hexopyranosyl)oxy)-, hydrochloride, (7R-trans)-	3.0877	1.62653	1.67157	0.175567	0.179404	UP	536.166	536.166	536.166	31.7967	31.7778	31.8155	253336	2.17796e+06	3.77233e+06	6.72553e+06	2.82375e+06			7		M536T32	y
339	7	Cys Asp Asp Trp	3.56905	1.83554	1.65333	0.178951	0.181626	UP	538.164	538.164	538.164	23.6456	23.5892	23.702	834.48	16868.5	27583	60584.1	36559.1			47		M538T24	y
340	0	1,4-beta-D-Glucan	3.05003	1.60882	1.65353	0.179961	0.182283	UP	537.166	537.166	537.166	31.7967	31.7778	31.8155	127866	1.11478e+06	1.93085e+06	3.40075e+06	1.41619e+06			7		M537T32	y
341	1	Isopentyl trifluoroacetate	1.97171	0.979444	1.66579	0.18003	0.182328	UP	185.079	185.078	185.079	3.63417	3.59383	3.669	32382.9	2.4677e+06	2.05265e+06	4.86559e+06	1.41526e+06			40		M185T4	y
342	-	Unknown	4.18842	-2.06641	-2.01324	0.181022	0.182971	DOWN	278.18	278.18	278.18	14.5237	14.52	14.529	53291.3	1.21193e+06	792640	289351	41403.3	[21][M+1]+		30		M278T15	n
343	-	Unknown	1.56232	-0.643687	-1.82619	0.18268	0.184039	DOWN	499.396	499.396	499.396	28.5913	28.4975	28.6852	2027.25	160867	51628.1	102967	18715.3			49		M499T29	y
344	-	Unknown	2.10772	1.07568	1.71548	0.182937	0.184204	UP	181.084	181.084	181.084	31.7182	31.6873	31.8155	12611.6	673331	663975	1.41942e+06	355792	[8][M+1]+		7		M181T32	n
345	-	Unknown	1.61565	0.692118	1.849	0.185468	0.18582	UP	388.394	388.394	388.394	20.4942	20.4937	20.594	63345.4	1.16936e+06	644892	1.88929e+06	197272			2		M388T20	y
346	1	DL-Alanine, N,N'-(1,4-dioxo-1,4-butanediyl)bis-	1.95692	0.968582	1.81247	0.186714	0.18661	UP	261.108	261.108	261.108	11.934	11.9212	11.9382	11224.1	168674	145709	330080	50601.2			11		M261T12	y
347	1	3-Dibenzofuranamine	1.56164	0.643061	1.91376	0.188851	0.187956	UP	184.075	184.075	184.076	29.2168	28.9792	29.285	5880.15	284778	24123.5	444721	142732			12		M184T29_1	y
348	8	Trifluoro(methyltellanyl)methane	43.2831	5.43573	1.94772	0.190649	0.189079	UP	214.93	214.93	214.931	19.205	19.14	19.27	943.873	2199.21	2065.55	95188.6	82667			23		M215T19_1	y
349	0	1,1'-Sulfinyldinaphthalene	1.90787	0.931966	1.71836	0.19622	0.19251	UP	303.084	303.084	303.084	5.41675	5.405	5.4285	3612.21	127034	43931	242365	107630			10		M303T5	y
350	1	Quinoline	1.62139	0.697229	1.56251	0.197411	0.193234	UP	130.065	130.065	130.065	29.0678	28.9792	29.1565	310548	1.82971e+07	7.74324e+06	2.96667e+07	9.94409e+06	[1][M]+		12		M130T29	y
351	4	n2,n6-bis(ethoxycarbonyl)lysine	3.26405	1.70666	1.54547	0.197484	0.193278	UP	291.156	291.156	291.156	12.2647	12.2397	12.2897	18736.7	165955	287442	542380	308790			27		M291T12	y
352	6	6α-Testosterone Enanthate	4.61074	2.205	1.77314	0.198023	0.193605	UP	417.297	417.297	417.297	23.4891	23.487	23.4912	6570.65	19569.4	20375.5	90720.1	66448.3			3		M417T23	y
353	-	Unknown	2.84355	1.5077	1.64628	0.198698	0.194013	UP	558.478	558.477	558.482	31.207	31.0888	31.3998	2755.12	87071.1	150812	248196	77412.7			41		M558T31	n
354	6	N-Oleoyl Glycine	465.295	8.862	1.88698	0.199791	0.194671	UP	340.282	340.282	340.283	23.504	23.487	23.521	4372.15	910.73	788.991	473263	433569			3		M340T24	y
355	6	Glyceryl lactooleate	2.27014	1.18278	1.85503	0.200138	0.194879	UP	429.319	429.319	429.325	29.541	29.4172	29.6908	3668.46	126805	20422.9	287864	148989			8		M429T30	y
356	1	ethyl 2-cyano-3-methylnonanoate	1.35664	0.440042	1.59629	0.200817	0.195286	UP	226.18	226.18	226.18	10.1837	10.1823	10.215	218317	2.67027e+06	884794	3.6226e+06	533760	[12][M]+		13		M226T10	y
357	3	4-Nitroprocainamide	235.856	7.88176	1.86561	0.203087	0.196639	UP	266.151	266.151	266.151	29.8669	29.8463	29.8875	1846.14	0	0	75174.5	69792.6			21		M266T30	y
358	0	4-Phenylpyridine	1.65317	0.725235	1.55938	0.203351	0.196795	UP	156.081	156.081	156.081	29.1016	29.0168	29.1863	13213.5	794244	323906	1.31302e+06	476564			12		M156T29	y
359	0	C16 Sphinganine	2902.22	11.5029	1.85641	0.204528	0.197492	UP	274.274	274.274	274.274	30.2731	30.2083	30.3378	15779.6	0	0	926226	864180			17		M274T30	y
360	2	O-(2,3,3-Trichloroprop-2-en-1-yl) methylphosphonodithioate	1.87432	0.90637	1.57313	0.204916	0.19772	UP	269.866	269.866	269.866	30.612	30.5185	30.6325	2279.17	138558	113600	259703	69900.6			46		M270T31	y
361	0	(1,4-Phenylene)dimethanediol--vanadium--water (1/4/5)	5.36486	2.42354	1.67785	0.206691	0.198763	UP	464.894	464.894	464.894	23.6456	23.5892	23.702	1071.54	13813.7	22518.2	74679.6	58658.4			47		M465T24	y
362	6	MG(0:0/18:2(9Z,12Z)/0:0)	1.29365	0.371443	1.5138	0.207856	0.199443	UP	355.282	355.282	355.283	21.7758	21.636	22.0477	16408.3	734989	154677	950816	192499			43		M355T22	y
363	2	Tricholine borate	3.04467	1.60629	1.61629	0.209092	0.200162	UP	372.323	372.323	372.323	26.6002	26.5955	26.7	4215.15	41847.5	39361.9	127736	83198.5			25		M372T27	y
364	0	Ammonium pentadecanoate	2.144	1.1003	1.80983	0.20963	0.200474	UP	260.258	260.258	260.259	9.36783	9.34983	9.388	34696.1	480209	51518.3	1.02957e+06	523217			14		M260T9	y
365	-	Unknown	1.91135	0.934593	1.62311	0.211635	0.20163	UP	535.489	535.489	535.49	29.7379	29.6908	29.785	3284.39	92028.1	82012.2	175898	35833.8			21		M535T30	n
366	4	5-(2-Carboxyethenyl)uridine	1.4018	0.487278	1.54984	0.212024	0.201853	UP	315.084	315.083	315.084	6.45417	6.4015	6.5475	20493.5	505643	195321	708809	115768			19		M315T6	y
367	0	Pyrazinetetracarboxamide	1.4725	-0.558266	-1.68439	0.215671	0.203955	DOWN	253.068	253.067	253.068	6.43	6.4015	6.5475	6241.86	282770	89536.4	192034	26244.5			19		M253T6	y
368	2	Ceramide (Cer(d18:1/20:0))	1.70421	0.769104	1.54145	0.218442	0.205533	UP	594.583	594.582	594.584	29.34	29.277	29.403	1831.82	81199.5	56473.8	138381	30643.9			34		M595T29	y
369	1	Undecanedioic acid, compound with 2,2'-iminodiethanol (1:2)	1.48478	0.570251	1.46353	0.21904	0.205872	UP	427.302	427.302	427.302	29.7379	29.6908	29.785	1300.46	87182.7	38183.1	129447	32310.1			21		M427T30	y
370	1	Alepric acid	1.57047	0.651192	1.5465	0.22094	0.206942	UP	225.185	225.185	225.185	14.5218	14.2972	14.529	8318.01	155272	88538.5	243849	44749.5			30		M225T15	y
371	3	2-Chloro-4,6-bis(octadecyloxy)-1,3,5-triazine	1.87881	-0.909822	-1.60864	0.222169	0.207631	DOWN	652.552	652.55	652.554	31.6627	31.4113	31.7182	2272.06	273578	47889.2	145506	129315			7		M653T32	y
372	-	Unknown	2.69401	1.42975	1.60928	0.225073	0.209246	UP	680.585	680.585	680.586	31.7182	31.638	31.8155	2174.43	76103.9	131816	205598	45269.1	[53][M+2]+		7		M681T32	n
373	0	1-Isothiocyanato-4-phenylbutane	1.67142	0.741076	1.43393	0.227263	0.210452	UP	192.084	192.084	192.084	31.3034	31.207	31.3998	3734.94	316471	197692	528956	163686			41		M192T31	y
374	1	1,1,1,3-tetrachlorotridecane	1.57881	0.658834	1.6693	0.228821	0.211305	UP	321.071	321.071	321.071	7.37767	7.29183	7.405	33767.6	606795	67093.4	958011	358190			15		M321T7	y
375	-	Unknown	1.54407	0.62674	1.43284	0.229866	0.211875	UP	131.068	131.068	131.068	29.1714	29.1565	29.1863	36869.3	2.14955e+06	858355	3.31905e+06	1.12332e+06	[1][M+1]+		12		M131T29	n
376	-	Unknown	1.67083	0.740562	1.69448	0.230486	0.212212	UP	521.585	521.585	521.586	29.7028	29.6908	29.7148	1814.51	84270.3	4891.62	140801	57576.8			21		M522T30	n
377	2	Hexanoic acid, 6-[[2-(acetyloxy)benzoyl]amino]-	1.82453	0.867526	1.64283	0.232035	0.21305	UP	294.134	294.134	294.134	7.39133	7.37767	7.405	11097	176273	31509.4	321615	149961			15		M294T7	y
378	-	Unknown	2.72295	1.44517	1.48851	0.23496	0.21462	UP	759.223	759.222	759.223	29.34	29.277	29.403	4401.46	61014.5	54987.9	166429	109646			34		M759T29	y
379	-	Unknown	2.04829	1.03442	1.66513	0.235242	0.214771	UP	160.107	160.106	160.108	31.7028	31.638	31.8155	3867.48	239870	260418	491542	26732.5	[6][M+2]+		7		M160T32	n
380	1	n-adenosylaziridine	2.35331	1.23469	1.67093	0.235383	0.214846	UP	293.136	293.136	293.136	11.934	11.9212	11.9382	5572.39	126549	177311	298060	12955.1			11		M293T12	y
381	-	Unknown	1.28387	0.360502	1.3725	0.242419	0.218552	UP	604.456	604.454	604.458	31.3444	31.289	31.3998	1055.29	91762.9	22130.5	117812	24307.8			41		M604T31	n
382	1	D-erythro-Sphingosine (Sphingosine)	1.84011	0.87979	1.46598	0.24672	0.220773	UP	286.274	286.274	286.274	29.34	29.1565	29.548	30075.2	1.91679e+06	768497	3.5271e+06	1.74046e+06			34		M286T29	y
383	6	L-alpha-Glutamyl-L-allothreonine	1.6021	0.679962	1.3597	0.247173	0.221005	UP	249.11	249.11	249.11	6.65425	6.6305	6.678	23268.5	488871	243318	783219	285285			45		M249T7	y
384	7	2-hydroxyethyl N-octadecylcarbamate	5.20193	2.37905	1.49015	0.248614	0.22174	UP	358.329	358.329	358.329	29.7028	29.6908	29.7148	1539.71	11469.1	19865.1	60662.1	53616.8			21		M358T30	y
385	0	Monoethanolamine laurate	702.938	9.45725	1.60826	0.249042	0.221958	UP	262.238	262.238	262.238	9.63433	9.61567	9.653	12068.2	1077.23	1865.81	906801	975438			16		M262T10	y
386	3	1,1,1-Trifluorododec-3-yn-2-one	178.683	7.48126	1.59288	0.252198	0.223554	UP	235.131	235.131	235.131	29.9269	29.8875	29.9663	1331.53	0	0	56925.9	61899.3			21		M235T30	y
387	-	Unknown	2.40481	-1.26592	-1.50807	0.253231	0.224073	DOWN	684.203	684.203	684.203	30.0806	29.9863	30.1748	37117.4	1.28218e+06	826476	533172	238688			21		M684T30	y
388	-	Unknown	3.94858	1.98133	1.46182	0.256188	0.225547	UP	722.616	722.611	722.621	29.5211	29.5012	29.541	695.809	6066.71	7419.36	24375	20384.5			8		M723T30	n
389	-	Unknown	1.30536	0.384452	1.34621	0.257042	0.22597	UP	370.3	370.3	370.301	23.6605	23.5892	23.7993	4337.55	105797	34025.4	138104	23875.4	[39][M+1]+		47		M370T24	n
390	-	Unknown	1.96174	0.972133	1.32723	0.257604	0.226248	UP	521.478	521.477	521.479	28.4879	28.4783	28.4975	1403.16	45023.7	35851.7	88324.8	43679.1			49		M521T28	n
391	-	Unknown	1.77204	0.825413	1.47542	0.258574	0.226726	UP	418.302	418.302	418.302	31.7182	31.6873	31.8155	5493.25	326974	283170	579600	88128.3			7		M418T32	y
392	1	Hexylamine	1.41068	0.496386	1.3364	0.259206	0.227037	UP	102.128	102.128	102.128	29.1714	29.1565	29.1863	160044	1.16466e+07	3.60496e+06	1.64295e+07	5.04297e+06			12		M102T29	y
393	-	Unknown	1.93238	0.950381	1.33125	0.2597	0.227279	UP	519.459	519.459	519.459	28.4879	28.4783	28.4975	2159.3	66723.5	47955	128935	65206.7			49		M519T28	n
394	0	2',3-Dimethoxy-5'-(trifluoromethyl)	1.52685	0.610557	1.5323	0.260444	0.227643	UP	299.089	299.089	299.089	7.37767	7.29183	7.405	225496	4.04853e+06	339737	6.18149e+06	2.38695e+06			15		M299T7	y
395	0	Dihydromethysticin	1.50649	0.591188	1.51172	0.260753	0.227794	UP	277.107	277.107	277.107	7.37767	7.29183	7.405	168380	3.05941e+06	349237	4.60895e+06	1.74071e+06			15		M277T7	y
396	0	Lidocaine hydrochloride monohydrate	1.50518	0.589932	1.46305	0.26098	0.227905	UP	289.168	289.167	289.168	20.5441	20.4942	20.594	17754.3	336659	191941	506731	60803.1			38		M289T21	y
397	-	Unknown	301.624	-8.23661	-1.54029	0.26339	0.229077	DOWN	934.874	934.869	934.878	30.505	30.4965	30.5135	1644	96166.2	108139	0	0			46		M935T31	n
398	1	(9Z)-Octadec-9-enamide	2.42533	1.27818	1.43079	0.263426	0.229095	UP	282.279	282.279	282.279	23.2818	23.058	23.303	1.15716e+06	1.96667e+07	1.17408e+07	4.76982e+07	3.18379e+07			3		M282T23	y
399	4	Cyclononyl trifluoroacetate	9.64733	3.27013	1.5291	0.264688	0.229704	UP	239.124	239.124	239.125	9.62717	9.60133	9.653	18200.5	62511.6	42702.5	603070	610812			16		M239T10	y
400	-	Unknown	1.61912	0.695207	1.29221	0.266349	0.230502	UP	314.334	314.334	314.334	29.34	29.277	29.403	24393.8	271833	166145	440130	152587			34		M314T29_2	n
401	0	4-Phenylbenzylamine	1.84779	0.8858	1.32913	0.266556	0.230602	UP	184.112	184.112	184.112	31.7182	31.6873	31.8155	11755.3	648972	606684	1.19936e+06	382577			7		M184T32	y
402	10	Isooctadecanoic acid, monoamide with 2-[(2-aminoethyl)amino]ethanol	1.22926	0.297796	1.38258	0.266821	0.230728	UP	388.394	388.394	388.394	29.4521	29.403	29.5012	5363.85	187096	22301.8	229990	48890.5			8		M388T29	y
403	-	Unknown	1.74893	0.80647	1.34989	0.267559	0.231081	UP	382.301	382.301	382.301	26.7153	26.7	26.7307	24198.3	391759	179636	685158	330839	[41][M+1]+		25		M382T27	n
404	-	Unknown	1.6687	0.738724	1.36888	0.269282	0.231902	UP	617.586	617.586	617.588	26.1337	25.901	26.2375	3789.48	93761.8	33679.5	156460	71828.6			29		M618T26	n
405	-	Unknown	1.79524	-0.844174	-1.29891	0.271037	0.232732	DOWN	394.301	394.301	394.301	29.5012	29.4115	29.541	172940	1.71927e+06	585176	957579	830181	[43][M+1]+		8		M394T30	n
406	8	Methoprene	1.32264	0.403418	1.28227	0.271345	0.232878	UP	311.256	311.256	311.256	21.8448	21.6827	22.0477	5017.82	408928	137506	540863	113370			43		M311T22	y
407	6	Persin	1.76809	0.822188	1.3508	0.273341	0.234014	UP	381.298	381.298	381.298	26.7153	26.7	26.7307	107650	1.66377e+06	707727	2.94169e+06	1.47788e+06	[41][M]+		25		M381T27	y
408	2	4-Biphenylamine	1.74464	0.802933	1.33077	0.277112	0.23631	UP	170.096	170.096	170.096	31.7182	31.6873	31.8155	21559.5	1.42234e+06	1.23364e+06	2.48166e+06	615711			7		M170T32	y
409	0	4-Phenylbenzylamine	1.58252	0.662227	1.2716	0.281201	0.238779	UP	184.112	184.111	184.113	29.1565	29.105	29.1863	7191.39	410721	270007	649976	182484			12		M184T29_2	y
410	0	Phenylacetylene	12.1821	3.6067	1.4238	0.286833	0.242146	UP	103.054	103.054	103.054	31.207	31.0888	31.3998	11602.1	39727.5	68810.1	486558	539197			41		M103T31	y
411	8	Campesteryl glucoside	3.6661	1.87425	1.27986	0.288435	0.243096	UP	563.426	563.426	563.426	31.3768	31.289	31.4647	1654.1	34259.7	59339.6	126273	109475			7		M563T31	y
412	1	Guanosine, 3'-amino-2',3'-dideoxy-	3.57717	1.83882	1.38755	0.294978	0.246946	UP	267.12	267.12	267.12	7.61317	7.59033	7.636	17074.9	199933	92622.7	715192	636487			48		M267T8	y
413	-	Unknown	1.84941	0.887065	1.22391	0.295734	0.247387	UP	317.324	317.324	317.325	29.285	29.277	29.403	12134.7	586289	401497	1.08429e+06	579213	[29][M+1]+		12		M317T29_1	n
414	2	Carbamothioic acid, (2-nitronaphtho(2,1-b)furan-7-yl)-, O-ethyl ester	1.28086	0.357109	1.26595	0.295986	0.247534	UP	317.059	317.058	317.059	6.43	6.4015	6.5475	12078.3	358606	62184.9	459322	122970			19		M317T6	y
415	5	(L)-Ornithine 2-oxoglutarate	1.51056	0.595081	1.2156	0.296051	0.247572	UP	279.12	279.12	279.12	6.1365	6.06917	6.20383	13191.8	264126	114697	398977	154154			37		M279T6	y
416	0	N-Butylaniline	1.7476	0.805379	1.24279	0.296544	0.24786	UP	150.128	150.126	150.128	31.7182	31.6873	31.8155	7997.04	545181	490272	952946	287391			7		M150T32_2	y
417	0	3-Phenylpropyl isothiocynate	1.98435	0.988665	1.23079	0.296817	0.248019	UP	178.068	178.068	178.068	30.6223	30.612	30.6325	6084.23	249913	186026	495914	291961			46		M178T31	y
418	-	Unknown	1.51405	0.598413	1.29271	0.304781	0.252633	UP	544.421	544.421	544.422	31.0888	30.944	31.207	1801.37	119584	78093.7	181056	26176.3			41		M544T31	y
419	-	Unknown	2.30853	1.20698	1.28037	0.308438	0.254727	UP	626.541	626.541	626.541	29.34	29.277	29.403	1229.28	32736	18415.7	75572.2	54943.4			34		M627T29	y
420	2	Dihydromikanolide	1.46364	0.549556	1.2829	0.318057	0.260162	UP	293.101	293.101	293.102	6.43	6.4015	6.5475	16855.1	425217	259749	622363	58102			19		M293T6_2	y
421	0	PG(14:0/16:0)	2.02711	1.01942	1.15543	0.3184	0.260354	UP	695.486	695.486	695.486	29.2317	29.1437	29.4172	6537.79	165226	148013	334930	206905	[54][M]+		12		M695T29	y
422	-	Unknown	2.37038	-1.24512	-1.13868	0.319473	0.260953	DOWN	268.151	268.15	268.151	11.2184	11.1518	11.285	200477	3.92784e+06	2.60185e+06	1.65705e+06	2.27184e+06	[19][M+2]+		1		M268T11_1	n
423	5	Triethenyl(fluoro)silane	3271.8	11.6759	1.30475	0.32191	0.26231	UP	129.052	129.052	129.052	0.452917	0.446	0.459833	69417.3	0	0	1.04419e+06	1.38616e+06			31		M129T0	y
424	9	alpha-Erythroidine	1.82339	-0.86662	-1.29627	0.323488	0.263185	DOWN	274.146	274.146	274.146	19.3433	19.289	19.5602	87099.2	1.75811e+06	1.05884e+06	964203	64593.3			23		M274T19	y
425	-	Unknown	1.69381	0.760271	1.2179	0.325189	0.264125	UP	291.272	291.272	291.272	9.62717	9.60133	9.653	26249.7	240625	223554	407754	80725	[27][M+1]+		16		M291T10	n
426	4	18-fluoro-octadecanoic acid	3.11379	1.63867	1.14491	0.326552	0.264876	UP	303.271	303.271	303.271	31.3768	31.289	31.4647	1209.11	30156.4	52232.4	94456.7	82062.2			7		M303T31	y
427	1	4-Pyridinemethanol, 3-hydroxy-2-methyl-5-((4-(6-methyl-2-(1-piperidinyl)-4-pyrimidinyl)-1-piperazinyl)methyl)-	3.40761	-1.76876	-1.23983	0.326918	0.265077	DOWN	413.266	413.266	413.266	29.4592	29.4115	29.541	464304	2.90327e+06	2.76632e+06	851892	748493	[44][M]+		8		M413T29	y
428	8	3-Oxochol-4-en-24-oic Acid	1.7257	0.78718	1.22423	0.337724	0.270957	UP	373.271	373.27	373.271	31.3998	31.289	31.4113	2282.31	150096	151425	259203	29988.6			7		M373T31	y
429	9	Dioctadec-1-en-1-yl cyclohexane-1,2-dicarboxylate	2.78654	-1.47848	-1.17384	0.33982	0.272084	DOWN	673.619	673.617	673.62	29.1714	29.1565	29.1863	974.943	21965.8	19650.7	7814.59	7060.78			12		M674T29	y
430	-	Unknown	1.16523	0.220609	1.08388	0.341936	0.273216	UP	481.443	481.441	481.444	28.6255	28.4975	28.678	1158.45	67440.1	13866.9	78582.9	11170.2			49		M481T29	y
431	-	Unknown	1.35191	0.434998	1.21233	0.342253	0.273385	UP	145.084	145.084	145.084	29.0678	28.9792	29.1565	45701.4	3.43704e+06	317010	4.64656e+06	1.69871e+06	[5][M+1]+		12		M145T29	n
432	-	Unknown	1.38238	0.467152	1.16589	0.343715	0.274164	UP	679.576	679.575	679.576	29.34	29.277	29.403	1781.66	79832.8	14847.3	110359	42850.7			34		M680T29	n
433	0	4-(Diphenylmethylidene)-3-(trimethylsilyl)oxetan-2-one	1.45628	0.542284	1.11293	0.34589	0.275319	UP	309.131	309.131	309.131	31.4322	31.3998	31.4647	27719.4	1.67571e+06	557258	2.4403e+06	1.05138e+06			7		M309T31	y
434	-	Unknown	3.17566	1.66706	1.17468	0.35083	0.277925	UP	156.134	156.134	156.136	23.6552	23.611	23.702	3235.09	48425.1	35285.1	153782	151286			47		M156T24	n
435	-	Unknown	2.66527	-1.41428	-1.15353	0.354805	0.280003	DOWN	673.448	673.448	673.449	28.0475	28.0383	28.0567	9157.4	601701	544940	225756	147269			52		M673T28	y
436	-	Unknown	3.31362	-1.72841	-1.1492	0.357142	0.281218	DOWN	414.27	414.27	414.27	29.5211	29.5012	29.541	120319	760780	775002	229485	201440	[44][M+1]+		8		M414T30	n
437	1	2-N-butyl-6-N-methyl-7H-purine-2,6-diamine	1.42252	0.508451	1.05639	0.362263	0.283861	UP	221.151	221.151	221.151	11.934	11.9212	11.9382	33313.8	617109	366227	877852	220550			11		M221T12	y
438	-	Unknown	2.89289	1.53251	1.13044	0.364636	0.285077	UP	684.203	684.203	684.203	29.34	29.277	29.403	8364.67	132777	92244	384109	373879			34		M684T29	y
439	9	Cer(d18:1/19:0)	2.75423	-1.46165	-1.10124	0.367669	0.286623	DOWN	580.561	580.558	580.561	29.6908	29.6022	29.7148	1406.29	109734	104504	39735.4	34636			21		M581T30	y
440	6	alanyl-l-alaninamide	2.87165	1.52188	1.06197	0.368803	0.287199	UP	160.107	160.105	160.108	23.8432	23.702	23.9472	1036.3	23296.4	31243.5	67204.5	64438.6			47		M160T24	y
441	1	Heptadecanamide	2.67612	1.42014	1.06129	0.369127	0.287363	UP	270.279	270.279	270.279	23.487	23.37	23.4947	81657.3	206584	246238	552843	508636			3		M270T23	y
442	-	Unknown	3.74053	1.90324	1.11575	0.370232	0.287923	UP	146.088	146.088	146.088	23.702	23.4912	23.8488	1092.09	16673.2	16582.4	62366.7	68967.6			47		M146T24	n
443	0	Guanine, 8-(p-nitrophenyl)-	1.36845	0.452539	1.04686	0.370539	0.288078	UP	273.073	273.073	273.073	5.06592	4.93267	5.16117	28407.6	1.49029e+06	800101	2.03939e+06	430338			42		M273T5	y
444	2	Pyrido(2,1,6-de)quinolizine	1.60357	0.681289	1.04267	0.374602	0.290124	UP	168.081	168.08	168.081	31.7182	31.6873	31.8155	19632.4	1.38449e+06	1.23862e+06	2.2203e+06	627338			7		M168T32	y
445	2	3-Phenyl-4-propylpyridine	1.70308	0.768146	1.02949	0.374803	0.290225	UP	198.127	198.123	198.127	31.7182	31.6873	31.8155	3244.67	192294	197404	327674	113621			7		M198T32	y
446	0	3,5,8-Trimethylquinoline	1.63421	0.708593	1.00559	0.380549	0.293092	UP	172.112	172.112	172.112	31.7182	31.6873	31.8155	52781.9	3.34918e+06	3.07886e+06	5.47343e+06	1.97682e+06			7		M172T32	y
447	5	Methanol, (4,6-bis(bis(butoxymethyl)amino)-s-triazin-2-ylimino)di-	1.97695	-0.98328	-1.04644	0.385553	0.295563	DOWN	531.389	531.387	531.39	29.4172	29.285	29.541	22665.6	549845	423198	278127	152227			8		M531T29	y
448	7	Pelargonidin 3-sophoroside 5-glucoside	1.64469	0.717815	0.976612	0.386974	0.29626	UP	758.221	758.221	758.222	29.277	29.1565	29.403	4190.2	115473	104140	190093	81661.8			12		M758T29	y
449	-	Unknown	2.49563	1.3194	0.958027	0.396289	0.300788	UP	720.606	720.605	720.606	29.7028	29.6908	29.7148	617.627	4118.64	7133.69	10703.2	9530.36			21		M721T30	n
450	6	Benzyloctyl adipate	8.82032	3.14083	1.06488	0.397344	0.301296	UP	349.235	349.235	349.235	20.494	20.4937	20.4943	1.16613e+06	2.14079e+06	2.10639e+06	1.88825e+07	2.71492e+07			2		M349T20_2	y
451	8	N-stearoyl glutamic acid	2.99612	-1.5831	-1.03596	0.397624	0.30143	DOWN	414.325	414.324	414.325	29.2103	29.1437	29.277	120319	750850	808931	250607	212489			12		M414T29	y
452	-	Unknown	1.34917	0.432077	0.944049	0.398599	0.301899	UP	226.053	226.053	226.053	6.48875	6.43	6.5475	22410.8	487526	221010	657757	220683	[11][M+1]+		19		M226T6	n
453	1	6-Methylquinoline	1.28952	0.366838	1.00799	0.399751	0.302451	UP	144.081	144.081	144.081	28.998	28.9792	29.0168	357137	2.89817e+07	4.99922e+06	3.73726e+07	1.35239e+07	[5][M]+		12		M144T29	y
454	-	Unknown	2.14714	-1.10242	-1.02244	0.401561	0.303316	DOWN	602.544	602.541	602.547	28.4879	28.4783	28.4975	743.438	38484.9	33471.4	17973.3	9329.27			49		M603T28	n
455	-	Unknown	1.84026	-0.87991	-1.00724	0.402042	0.303545	DOWN	620.531	620.53	620.531	28.4879	28.4783	28.4975	2220.56	103298	76650	56132.2	26512.9			49		M621T28	y
456	9	Galanthamine	1.54846	-0.630835	-1.03127	0.404719	0.304819	DOWN	288.162	288.162	288.163	20.5442	20.4942	20.7933	44900.5	891995	521626	576053	97371.4			38		M288T21	y
457	1	2,3-Bis(hexadecanoyloxy)propyl 3-hydroxybenzoate	2.14905	-1.1037	-0.966719	0.408295	0.30651	DOWN	689.536	689.533	689.55	31.207	31.0888	31.4113	4674.6	437935	379284	203724	179538			41		M690T31	y
458	6	Monostearyl fumarate	1.44057	-0.526643	-0.980712	0.409651	0.307149	DOWN	369.298	369.297	369.298	23.6605	23.5892	23.9785	18396.2	737307	371833	511815	142614	[39][M]+		47		M369T24	y
459	-	Unknown	1.31771	0.398028	0.92981	0.411468	0.308002	UP	677.569	677.569	677.569	29.34	29.277	29.403	16618.2	557183	186246	734203	272120			34		M678T29	y
460	7	Benzyloctyl adipate	8.86704	3.14845	1.0247	0.412052	0.308275	UP	349.235	349.235	349.235	20.2398	20.1868	20.3308	1.16613e+06	2.43317e+06	2.62841e+06	2.1575e+07	3.22486e+07			2		M349T20_1	y
461	-	Unknown	2.33862	1.22566	0.929541	0.414523	0.309429	UP	579.552	579.552	579.553	29.7806	29.7148	29.8463	2142.98	22552	29946.4	52883.1	47931.2			21		M580T30	y
462	-	Unknown	1.38114	0.465859	0.932883	0.417334	0.310736	UP	345.356	345.355	345.356	15.5342	15.488	15.5453	41091.2	1.19748e+06	741662	1.65388e+06	409891	[35][M+1]+		22		M345T16	n
463	2	1-Eicosanamine	1.77528	0.828043	0.906139	0.418578	0.311312	UP	298.346	298.346	298.347	29.0678	28.9792	29.1565	1481.26	31192.9	28950.4	55564.9	36498.6			12		M298T29	y
464	1	Methyl 2-amino-5-chloro-3-iodobenzoate	1.62044	0.696384	0.965459	0.419326	0.311658	UP	311.928	311.927	311.929	29.6833	29.6255	29.7412	6683.87	475832	501128	771056	171426			21		M312T30	y
465	0	1,3,5-Triazine-2,4,6-triamine monophosphate	1.33472	0.416534	0.898586	0.419716	0.311838	UP	225.05	225.05	225.05	6.48875	6.43	6.5475	184599	4.39918e+06	2.03646e+06	5.87166e+06	1.97699e+06	[11][M]+		19		M225T6_2	y
466	-	Unknown	1.62287	0.698546	0.898216	0.422156	0.312962	UP	408.368	408.368	408.368	23.4898	23.372	23.611	2939.62	54983.9	51860.1	89404.3	41424.6			3		M408T23	n
467	-	Unknown	40.4969	5.33974	0.990445	0.426317	0.314868	UP	663.547	663.544	663.549	31.6873	31.638	31.7182	304179	170171	148128	6.89561e+06	1.17602e+07			7		M664T32	y
468	-	Unknown	1.5405	0.623399	0.977817	0.42815	0.315703	UP	214.113	214.113	214.113	8.049	7.98733	8.12217	92127	2.59262e+06	2.45979e+06	3.99393e+06	332799	[10][M+1]+		6		M214T8	n
469	-	Unknown	2.5841	1.36966	0.945454	0.429944	0.316518	UP	761.22	761.219	761.221	28.998	28.9792	29.0168	4648.47	46091.7	40131.8	119380	128125	[56][M+1]+		12		M761T29	n
470	-	Unknown	2.60808	-1.38299	-0.946065	0.430119	0.316597	DOWN	392.287	392.287	392.29	29.5012	29.4172	29.541	38144.4	228317	246526	87435.8	75827.6	[42][M+1]+		8		M392T30	n
471	2	Phosphorothioic acid, O-(1,2-dihydro-1,6-dimethyl-2-oxo-4-pyridinyl) O,O-diethyl ester	7.23048	-2.85409	-0.977397	0.431352	0.317155	DOWN	292.076	292.076	292.076	6.43	6.34717	6.5475	126712	2.12931e+06	3.25061e+06	294490	75882.3			19		M292T6	y
472	2	Guanidine, 1-(4,6-dimethyl-2-pyrimidinyl)-3-(p-fluorophenyl)-	1.47459	-0.560315	-0.956362	0.432174	0.317527	DOWN	260.13	260.13	260.13	30.5185	30.4965	30.6325	4295.57	461688	262895	313096	57515			46		M260T31	y
473	5	2-{[(Cyclohexanecarbonyl)oxy]methyl}-15-hydroxynonadecanoic acid	2.64612	-1.40388	-0.956336	0.437118	0.319749	DOWN	455.371	455.37	455.373	29.105	29.0168	29.1437	7882.23	370395	414000	139977	52519.2			12		M455T29	y
474	3	diundecylarsinic acid	1.25098	0.323059	0.852579	0.441942	0.321899	UP	419.285	419.285	419.285	6.9945	6.942	6.99733	184728	2.15411e+06	781900	2.69475e+06	771336			18		M419T7	y
475	-	Unknown	1.24073	0.311184	0.857293	0.446263	0.323809	UP	589.437	589.436	589.437	31.3034	31.207	31.3998	3287.93	248144	100461	307879	66878.1			41		M589T31	n
476	1	3,5,8-Trimethylquinoline	1.19465	0.256594	0.863762	0.450476	0.325658	UP	172.112	172.112	172.112	28.998	28.9792	29.0168	30576.9	2.44597e+06	446951	2.92209e+06	843656			12		M172T29	y
477	-	Unknown	1.40465	-0.490216	-0.903398	0.456027	0.328072	DOWN	589.429	589.429	589.429	23.0757	22.942	23.1842	16916.7	361833	196293	257596	37540.4			3		M589T23	y
478	1	9H-Purin-6-amine, 9-(3-deoxy-3-(4-morpholinyl)-beta-D-arabinofuranosyl)-	2.01409	1.01013	0.833479	0.45631	0.328195	UP	337.162	337.162	337.162	8.08558	8.049	8.12217	3233.43	67036.6	116111	135446	82026.2			6		M337T8	y
479	-	Unknown	1.77821	0.830425	0.872045	0.457151	0.328558	UP	333.334	333.334	333.334	26.2523	26.2375	26.267	26899.4	735540	402902	1.30794e+06	1.06312e+06			29		M333T26	n
480	-	Unknown	1.4537	0.539729	0.890203	0.457319	0.328631	UP	256.153	256.153	256.153	6.96967	6.942	6.99733	27173.5	357783	305441	520109	80356.8	[17][M+1]+		18		M256T7	n
481	8	Alexidine	1.45953	0.545503	0.814494	0.462911	0.331034	UP	509.472	509.472	509.473	30.5652	30.5185	30.612	7830.18	276470	170065	403516	209925			46		M509T31	y
482	4	4-Octadecyl-2-sulfanylphenol	2.09544	1.06725	0.844704	0.464333	0.331642	UP	379.302	379.301	379.302	29.7028	29.6908	29.7148	1795.19	20549.9	19275	43177.5	42204.4			21		M379T30	y
483	-	Unknown	1.59119	0.670105	0.811099	0.464652	0.331778	UP	696.49	696.489	696.491	29.277	29.1437	29.4172	3064.48	98353.6	78124.9	156499	96507.5	[54][M+1]+		12		M696T29	n
484	-	Unknown	2.05708	1.04059	0.838636	0.469064	0.333652	UP	622.506	622.505	622.506	29.6159	29.541	29.6908	962.805	10129.7	8826.58	20950	20530.4			21		M623T30_1	y
485	7	Monostearyl fumarate	1.91838	-0.93989	-0.819534	0.46946	0.33382	DOWN	369.303	369.302	369.303	29.6159	29.4172	29.8453	3486.48	203514	179049	105980	102141			21		M369T30	y
486	1	Propanoic acid, 3-(2-butoxyethoxy)-, potassium salt	1.40353	0.489063	0.849894	0.471515	0.334688	UP	229.084	229.084	229.084	8.08558	8.049	8.12217	11827.4	428627	335674	601592	107593			6		M229T8	y
487	6	Tetrahydroquinoline	1.53893	0.621932	0.844212	0.472287	0.335013	UP	134.097	134.097	134.098	29.1016	29.0168	29.1863	4341.44	213729	223261	328915	77482.3			12		M134T29	y
488	-	Unknown	1.53877	0.621777	0.791107	0.47339	0.335477	UP	372.318	372.318	372.319	29.4172	29.4115	29.5012	12024.2	191758	165954	295072	153698	[40][M+1]+		8		M372T29	n
489	8	Dihexadecyl peroxodicarbonate	1.48995	0.575264	0.829534	0.480818	0.338577	UP	571.489	571.486	571.49	31.3998	31.207	31.4113	5617.4	411591	400984	613409	129547			7		M571T31	y
490	0	1-(2-Ethylphenyl)-2,2,2-trifluoroethan-1-one	1.26504	0.339187	0.777853	0.481778	0.338975	UP	203.068	203.068	203.068	6.48875	6.43	6.5475	42488.1	1.01542e+06	378206	1.28454e+06	464851			19		M203T6	y
491	-	Unknown	1.59224	0.671054	0.815774	0.481981	0.339059	UP	123.94	123.94	123.94	30.5185	30.4965	30.612	2406.34	177944	207981	283498	83488.9			46		M124T31_1	n
492	1	2-Sulfanylidene-1,3-thiazolidine-3-carbonyl chloride	1.24192	0.312569	0.777341	0.482604	0.339317	UP	181.949	181.949	181.949	30.6223	30.612	30.6325	2266.5	184312	61452.1	228900	78064.9			46		M182T31	y
493	-	Unknown	1.14593	0.196519	0.768424	0.485132	0.34036	UP	397.335	397.33	397.341	30.0806	29.9863	30.1748	1926.5	100941	23095.1	115672	23854.5			21		M397T30	y
494	2	3α-Hydroxy-6-oxo-5β-cholan-24-oic Acid	3.02416	-1.59653	-0.834942	0.485205	0.34039	DOWN	391.285	391.285	391.285	29.5211	29.5012	29.541	151736	814449	1.10618e+06	269208	236018	[42][M]+		8		M391T30	y
495	-	Unknown	1.56224	0.643616	0.794397	0.495666	0.344658	UP	507.868	507.868	507.868	29.0609	28.9792	29.1437	130467	1.66601e+06	1.92655e+06	2.60288e+06	678937			12		M508T29	n
496	2	Pyrido(2,1,6-de)quinolizine	1.23378	0.303085	0.776152	0.498397	0.34576	UP	168.081	168.08	168.081	29.1016	29.0168	29.1863	10566.8	838211	179105	1.03417e+06	398934			12		M168T29	y
497	-	Unknown	1.29278	-0.370477	-0.79228	0.499645	0.346262	DOWN	564.608	564.608	564.608	30.5755	30.5185	30.6325	1493.71	140415	20419.7	108615	66453.9			46		M565T31	n
498	6	2,3-Diaceto-1-stearin	1.45638	0.542385	0.765576	0.503269	0.347713	UP	443.334	443.334	443.334	31.6873	31.638	31.8155	7151.1	616319	579157	897749	264536			7		M443T32	y
499	0	n-adenosylaziridine	1.44833	0.53439	0.751473	0.503474	0.347795	UP	293.136	293.136	293.136	9.35883	9.28817	9.388	10040.6	581666	518995	842444	303181			14		M293T9	y
500	-	Unknown	1.1814	0.240495	0.777274	0.513563	0.351788	UP	159.099	159.099	159.099	29.0678	28.9792	29.1565	34896.5	3.10501e+06	234016	3.66825e+06	1.2331e+06	[7][M+1]+		12		M159T29	n
501	3	Phenyldisilene	2.07173	1.05083	0.722394	0.514974	0.352341	UP	137.024	137.024	137.024	29.6159	29.541	29.6908	1795.29	15136.7	22080.4	31473.1	32352.4			21		M137T30	y
502	-	Unknown	1.83666	-0.877086	-0.735256	0.516995	0.353131	DOWN	602.543	602.54	602.546	31.7028	31.6873	31.7182	2960.32	249481	240527	135786	117821			7		M603T32	n
503	-	Unknown	2.11803	-1.08272	-0.776589	0.518652	0.353777	DOWN	550.629	550.629	550.629	23.4464	23.3913	23.5015	2604.75	97404.1	114669	45988.1	1121.36			3		M551T23	n
504	4	Ile Lys Lys Val	2.01098	-1.0079	-0.763916	0.5189	0.353874	DOWN	487.362	487.362	487.364	29.277	29.1565	29.548	8124.91	510239	568797	253727	121353			12		M487T29	y
505	-	Unknown	1.40124	-0.486699	-0.730822	0.519954	0.354283	DOWN	608.493	608.491	608.495	29.7028	29.6908	29.7148	1153.37	44548.4	13166	31685.8	27494.5			21		M608T30	n
506	-	Unknown	1.45391	0.539936	0.746035	0.521721	0.354968	UP	608.489	608.489	608.49	31.4113	31.3998	31.4647	1783.88	130720	131523	190209	42158.4			7		M608T31	n
507	-	Unknown	1.23191	0.300894	0.69142	0.52841	0.357544	UP	227.164	227.164	227.164	10.1837	10.1167	10.2733	19428.2	212947	94755.7	262331	79533	[12][M+1]+		13		M227T10	n
508	-	Unknown	1.34336	0.42585	0.694504	0.530975	0.358524	UP	613.183	613.183	613.183	29.8458	29.6255	29.8875	26960.6	1.20576e+06	860385	1.61977e+06	570830	[52][M+3]+		21		M613T30	n
509	5	Dioctadec-1-en-1-yl cyclohexane-1,2-dicarboxylate	1.6979	-0.763755	-0.698694	0.531255	0.358631	DOWN	673.616	673.616	673.617	31.7028	31.6873	31.7182	1604.33	137382	120278	80869.1	71831.8			7		M674T32	y
510	8	Isopeonidin 3-rutinoside	1.35631	0.439691	0.687918	0.531357	0.35867	UP	610.184	610.184	610.184	29.8453	29.6255	29.8875	169295	7.17269e+06	5.06621e+06	9.72842e+06	3.96747e+06	[52][M]+		21		M610T30	y
511	2	2,6-Dimethylquinoline	1.17909	0.237678	0.746839	0.532002	0.358916	UP	158.096	158.096	158.096	28.998	28.9792	29.0168	265981	2.34701e+07	849155	2.76735e+07	9.71123e+06	[7][M]+		12		M158T29	y
512	0	1,1,1-trifluorodecane-2,4-dione	1.67711	0.745976	0.68153	0.533181	0.359364	UP	225.11	225.109	225.11	10.183	10.1823	10.1837	20567.6	227332	287566	381260	265216			13		M225T10	y
513	1	1-Heptadecanamine, N,N-dimethyl-, acetate	1.2694	0.34415	0.721786	0.534569	0.359891	UP	344.352	344.352	344.353	15.5342	15.488	15.5453	166631	4.84383e+06	2.98864e+06	6.14877e+06	934813	[35][M]+		22		M344T16	y
514	2	N-Stearylbenzylamine	1.44784	-0.5339	-0.722958	0.535784	0.360351	DOWN	360.362	360.361	360.362	29.1243	28.9792	29.285	18763.3	1.82153e+06	1.29951e+06	1.25811e+06	365191	[37][M]+		12		M360T29_2	y
515	-	Unknown	1.23958	0.309852	0.674642	0.536928	0.360784	UP	594.598	594.597	594.599	26.2375	26.1367	26.267	746.253	24380.9	10784.5	30222.1	10420.6			29		M595T26	n
516	-	Unknown	1.34019	0.42244	0.676828	0.538401	0.361339	UP	612.183	612.183	612.183	29.8453	29.6255	29.8875	69546.9	2.98109e+06	2.07786e+06	3.99523e+06	1.55496e+06	[52][M+2]+		21		M612T30	n
517	-	Unknown	1.71417	-0.777508	-0.679023	0.542068	0.362717	DOWN	595.584	595.583	595.584	31.7028	31.6873	31.7182	2043	187065	170626	109085	102241			7		M596T32	y
518	6	MG(0:0/18:2(9Z,12Z)/0:0)	1.48813	0.573496	0.693473	0.54289	0.363024	UP	355.282	355.282	355.283	31.3998	31.207	31.4113	8912.66	686862	770899	1.0223e+06	328043			7		M355T31	y
519	1	tert-Butyl 4-[(2-oxohexadecanoyl)amino]butanoate	1.42825	0.514253	0.65998	0.545628	0.364046	UP	412.342	412.342	412.343	30.5755	30.5185	30.6325	5442.67	351534	266029	502080	292108			46		M412T31	y
520	1	Dimethyl diphenylsilane	1.40065	0.486099	0.718823	0.546778	0.364474	UP	213.11	213.109	213.11	8.049	7.98733	8.12217	963811	2.45764e+07	2.37163e+07	3.44231e+07	689287	[10][M]+		6		M213T8	y
521	0	N-Hexadecyl-N,N-diphenylanilinium chloride	1.85193	0.889026	0.686522	0.547026	0.364566	UP	506.355	506.354	506.357	27.35	27.1998	27.3517	11190.5	150635	125048	278965	298645			51		M506T27	y
522	-	Unknown	1.62811	0.703195	0.708281	0.548238	0.365016	UP	546.481	546.479	546.482	29.7028	29.6908	29.7148	1744.66	27278.5	7410.84	44305.9	40974.4			21		M546T30	y
523	1	L-Lysinamide, L-leucyl-L-isoleucylglycyl-	1.45356	0.539594	0.698201	0.553628	0.367006	UP	429.318	429.312	429.318	31.4113	31.3998	31.4647	6307.85	434200	481566	631292	84555.7	[46][M]+		7		M429T31	y
524	5	N,N-Tetramethylcystamine	1.30996	-0.389519	-0.691951	0.55631	0.367989	DOWN	209.115	209.115	209.115	8.049	7.98733	8.12217	23370	779781	453808	595273	85815.4			6		M209T8	y
525	-	Unknown	1.32196	0.402676	0.642112	0.558909	0.368939	UP	611.185	611.185	611.185	29.8453	29.6255	29.8875	91372.7	4.05071e+06	2.84773e+06	5.35487e+06	2.06539e+06	[52][M+1]+		21		M611T30	n
526	1	Diphenylcarbonate	1.24528	0.316475	0.639445	0.559159	0.36903	UP	215.07	215.07	215.07	6.96967	6.942	6.99733	19839.9	312027	163064	388563	128014			18		M215T7	y
527	-	Unknown	1.33915	-0.421315	-0.662822	0.567359	0.371998	DOWN	621.503	621.502	621.503	29.5211	29.5012	29.541	1680.91	31197.1	5670.33	23189.8	20141.1			8		M622T30	n
528	6	1-Oleoyl-2-acetyl-sn-glycerol	1.17695	0.235054	0.631116	0.568454	0.372391	UP	399.308	399.308	399.309	21.7758	21.636	22.0477	23364.9	767939	316625	903827	197048			43		M399T22	y
529	-	Unknown	1.77616	-0.828762	-0.664839	0.569953	0.372929	DOWN	537.407	537.404	537.409	29.2207	29.1565	29.285	1490.84	59117	65951.5	33283.6	13413.2			12		M537T29	n
530	0	N-Octadecyloctadecan-1-imine N-oxide	1.28331	-0.359873	-0.619187	0.572513	0.373843	DOWN	536.576	536.576	536.577	30.5135	30.4965	30.5185	1309.8	105284	37941.8	82040.6	52799.3			46		M537T31	y
531	1	beta-Ionone	1.3357	0.417593	0.664773	0.573541	0.37421	UP	193.158	193.158	193.159	11.603	11.603	11.603	21944.6	306971	267302	410020	25249.7			5		M193T12	y
532	9	Dihexadecyl peroxodicarbonate	1.44054	-0.526613	-0.657546	0.57468	0.374615	DOWN	571.488	571.486	571.492	29.105	28.9792	29.285	2355.19	148456	117648	103055	21462.9			12		M571T29	y
533	-	Unknown	1.31504	0.39511	0.60522	0.579595	0.376355	UP	614.182	614.182	614.182	29.8463	29.8453	29.8875	10938	499821	356125	657286	276140	[52][M+4]+		21		M614T30	n
534	1	N-Stearylbenzylamine	1.56565	0.64676	0.645249	0.583038	0.377566	UP	360.362	360.36	360.362	23.3913	23.372	23.611	5421.11	437589	84958.1	685110	658971	[38][M]+		3		M360T23	y
535	-	Unknown	2.0633	1.04495	0.641085	0.584095	0.377937	UP	113.964	113.964	113.964	0.452917	0.446	0.459833	24953.9	683578	322271	1.41032e+06	1.93684e+06			31		M114T0	n
536	5	DG(18:1(9Z)/18:2(9Z,12Z)/0:0)[iso2]	1.25697	0.329951	0.600367	0.593146	0.381084	UP	619.527	619.526	619.527	31.3034	31.207	31.3998	7050.95	331202	222963	416312	102844			41		M620T31	y
537	4	Benzenesulfonic acid, 2-[[[3-[[8-[[(2-ethoxyethoxy)carbonyl]amino]-2-hydroxy-1-naphthalenyl]azo]-4-hydroxyphenyl]sulfonyl]amino]-	1.77598	-0.828618	-0.617568	0.593939	0.381357	DOWN	631.114	631.114	631.114	29.8669	29.8463	29.8875	12600.6	277112	330010	156033	80063.5			21		M631T30	y
538	6	Benzyloctyl adipate	1.3176	0.397911	0.610414	0.595926	0.382041	UP	349.235	349.235	349.235	28.4879	28.4783	28.4975	12278	574602	498149	757235	142832			49		M349T28	y
539	0	Tridodecylamine	1.17775	0.236039	0.596954	0.600329	0.38355	UP	522.597	522.597	522.597	31.438	31.3998	31.6873	29246.8	1.71919e+06	835902	2.02479e+06	295744	[51][M]+		7		M523T31	y
540	1	Monoethanolamine myristate	1.17984	0.238593	0.572586	0.603709	0.384701	UP	290.269	290.269	290.269	11.934	11.9212	11.9382	22811.2	509565	237132	601206	143576			11		M290T12	y
541	-	Unknown	1.20724	0.271718	0.586694	0.603953	0.384784	UP	609.598	609.597	609.598	31.3034	31.207	31.3998	1523.11	135259	76803.4	163291	30818.5			41		M610T31	n
542	-	Unknown	1.3094	0.388902	0.60137	0.605102	0.385174	UP	679.577	679.576	679.577	31.7028	31.638	31.8155	3796.31	337687	296107	442306	55802.1	[53][M+1]+		7		M680T32	n
543	-	Unknown	1.20206	-0.265514	-0.558555	0.607274	0.385908	DOWN	640.587	640.587	640.588	29.1437	28.9792	29.285	17694.6	1.02383e+06	411746	851725	339534			12		M641T29	n
544	2	4-(Phenylethynyl)pyridine	1.15179	0.203874	0.572561	0.608983	0.386485	UP	180.08	180.08	180.081	29.1714	29.1565	29.1863	40338.1	3.27769e+06	642566	3.7752e+06	1.36095e+06			12		M180T29	y
545	-	Unknown	1.16545	0.220889	0.552249	0.610475	0.386987	UP	649.538	649.537	649.538	29.1437	29.0168	29.277	11407	317784	122444	370361	110456			12		M650T29	y
546	-	Unknown	1.55747	0.6392	0.557368	0.610505	0.386997	UP	760.22	760.219	760.22	29.1565	28.9792	29.277	6709.37	119804	118152	186756	171255	[56][M]+		12		M760T29	y
547	3	MG(0:0/18:2(9Z,12Z)/0:0)	1.20154	-0.264889	-0.557905	0.610578	0.387022	DOWN	355.283	355.282	355.284	28.998	28.9792	29.0168	5669.52	553631	239046	460767	161172			12		M355T29	y
548	1	Dodecanoic acid, ammonium salt	1.31353	0.39345	0.5618	0.617912	0.389473	UP	218.211	218.211	218.212	6.43	6.4015	6.5475	92160.6	1.37605e+06	1.22835e+06	1.80749e+06	510291			19		M218T6	y
549	-	Unknown	1.49029	-0.575595	-0.542646	0.619777	0.390091	DOWN	649.537	649.536	649.538	31.7028	31.6873	31.7182	10742.5	968740	840205	649999	573684			7		M650T32	y
550	-	Unknown	1.28581	0.362682	0.558597	0.629424	0.393265	UP	551.521	551.521	551.522	31.7182	31.6873	31.8155	3131.54	274454	239557	353033	44486.1			7		M552T32	n
551	-	Unknown	1.58154	-0.661332	-0.531792	0.629458	0.393276	DOWN	455.332	455.33	455.332	31.207	31.0888	31.4113	3969.73	252834	261888	159826	152247			41		M455T31	y
552	-	Unknown	1.08238	-0.114209	-0.518735	0.63134	0.39389	DOWN	317.324	317.324	317.325	13.6973	13.669	13.717	122627	2.23661e+06	396508	2.06638e+06	407259	[28][M+1]+		9		M317T14	n
553	3	3-Methylpyridine-2,6-diamine	1.34069	0.422972	0.526909	0.631574	0.393966	UP	124.087	124.086	124.087	31.3998	31.289	31.4113	3246.75	258743	247769	347036	151153			7		M124T31_2	y
554	-	Unknown	1.4682	0.554049	0.520255	0.633778	0.394682	UP	317.324	317.324	317.325	31.6873	31.638	31.7182	12688.3	588957	517598	864758	758412	[30][M+1]+		7		M317T32	n
555	0	Cer(d18:0/18:0)	1.29309	-0.370821	-0.538208	0.633894	0.394719	DOWN	568.567	568.566	568.567	29.105	29.0168	29.285	25336.9	920156	629012	711596	234163			12		M569T29	y
556	-	Unknown	1.46044	-0.546405	-0.517875	0.635016	0.395083	DOWN	618.57	618.57	618.57	31.7028	31.6873	31.7182	2060.88	184263	159730	126136	110820			7		M619T32	n
557	6	N-butyl arachidonoyl amine	1.68114	-0.749443	-0.550357	0.635268	0.395165	DOWN	360.324	360.324	360.324	29.1243	29.105	29.1437	72953	3.05847e+06	3.85751e+06	1.81928e+06	573483			12		M360T29_1	y
558	-	Unknown	1.29714	0.375331	0.521818	0.635301	0.395175	UP	595.586	595.586	595.587	29.1863	29.0168	29.277	1357.08	76396.7	64833.2	99096.9	38392.5			12		M596T29	y
559	0	1-Dodecanamine, N-dodecyl-N-methyl-	1.47779	-0.563442	-0.521965	0.636209	0.395469	DOWN	368.425	368.425	368.425	23.1732	23.1623	23.1842	4749.99	67819.1	63436.3	45892.2	35636.1			3		M368T23	y
560	6	(3E)-1-Phenyl-3-(phenylimino)butan-1-one--copper (2/1)	1.36867	0.452778	0.520653	0.637789	0.395979	UP	538.164	538.164	538.164	31.7778	31.6873	31.8155	85874.9	1.79944e+06	1.9425e+06	2.46299e+06	1.04854e+06			7		M538T32	y
561	7	26,27-bisnor-22-dehydro-cholesterol	1.60546	-0.682983	-0.519082	0.640749	0.396931	DOWN	357.318	357.317	357.318	29.6908	29.6022	29.7148	2493.92	103292	117203	64231.6	57013.1			21		M357T30	y
562	7	Arachidonoyl amine	1.31543	0.395537	0.505706	0.642306	0.39743	UP	304.261	304.261	304.261	23.2924	23.058	23.4947	319935	9.88315e+06	6.2013e+06	1.30006e+07	8.69194e+06			3		M304T23	y
563	5	Peroxydicarbonic acid, C,C'-ditetradecyl ester	1.16961	0.226032	0.500513	0.64442	0.398106	UP	515.428	515.426	515.43	28.4879	28.4783	28.4975	1775.04	56929.3	20607.8	66585.3	26303.7			49		M515T28	y
564	-	Unknown	1.25999	0.333413	0.518466	0.644524	0.398139	UP	540.447	540.447	540.447	23.2818	23.1777	23.303	4988.24	109529	88248.1	138006	35530.9			3		M540T23	n
565	4	octane-1,4,7-triyl trihexanoate	1.28831	0.365478	0.516341	0.645367	0.398408	UP	457.35	457.349	457.351	31.7182	31.6873	31.8155	5428.61	450437	402988	580439	166654			7		M457T32	y
566	3	11,11'-(Piperazine-1,4-diyl)bis(2-chlorodibenzo[b,f][1,4]oxazepine)	1.31266	0.392492	0.502277	0.64854	0.399584	UP	541.121	541.121	541.121	31.748	31.6873	31.8155	100641	2.08296e+06	1.95906e+06	2.73436e+06	1.09902e+06			7		M541T32	y
567	0	alpha-Naphylisothiocyanate	1.44486	-0.530935	-0.489081	0.653519	0.401421	DOWN	186.037	186.037	186.037	31.7182	31.6873	31.7778	4435.12	369680	332573	255825	227978			7		M186T32	y
568	0	Ammonium pentadecanoate	1.17812	0.236482	0.503489	0.658324	0.403182	UP	260.258	260.258	260.259	29.277	29.0168	29.548	20707.9	1.60827e+06	271251	1.89473e+06	947383			12		M260T29	y
569	-	Unknown	1.2625	0.336286	0.495352	0.664364	0.405382	UP	678.572	678.572	678.572	31.7182	31.6873	31.8155	11185.1	982539	874143	1.24059e+06	223688	[53][M]+		7		M679T32	n
570	-	Unknown	1.32912	0.410468	0.488068	0.666968	0.406325	UP	668.619	668.619	668.619	31.3998	31.207	31.4113	18759.5	892057	996760	1.18579e+06	305051			7		M669T31	n
571	0	Monoethanolamine laurate	1.39867	0.484052	0.470083	0.668	0.406698	UP	262.238	262.238	262.238	6.9945	6.942	6.99733	80688.4	414268	523528	579571	311265			18		M262T7	y
572	-	Unknown	1.13486	-0.182513	-0.473495	0.674218	0.408936	DOWN	456.37	456.37	456.37	29.0168	28.9792	29.105	3809.75	307940	44487.5	271346	126250			12		M456T29	y
573	-	Unknown	1.47471	0.560428	0.451504	0.675309	0.409326	UP	267.155	267.155	267.155	11.2184	11.1518	11.285	103878	903518	1.22765e+06	1.33242e+06	1.09548e+06	[19][M+1]+		1		M267T11_2	n
574	5	4-Nitroprocainamide	1.63578	-0.70998	-0.482609	0.676931	0.409907	DOWN	266.151	266.151	266.151	11.1518	11.025	11.285	814159	6.89138e+06	9.60708e+06	4.2129e+06	333912	[19][M]+		1		M266T11	y
575	-	Unknown	1.14366	0.193653	0.446088	0.679015	0.41065	UP	700.647	700.647	700.647	29.105	29.0168	29.1437	1473.43	74899.3	31474.4	85659.1	27472			12		M701T29	n
576	0	Methanol, (4,6-bis(bis(butoxymethyl)amino)-s-triazin-2-ylimino)di-	1.19333	-0.25499	-0.470018	0.682962	0.412054	DOWN	531.387	531.384	531.387	21.4449	21.289	21.72	24325.6	614097	362840	514609	52514.1			44		M531T21	y
577	-	Unknown	1.13557	-0.18342	-0.444371	0.683635	0.412292	DOWN	632.582	632.581	632.582	31.4322	31.3998	31.4647	1869.41	179469	44812.7	158043	70473.1			7		M633T31	n
578	-	Unknown	1.26672	0.341097	0.443257	0.684973	0.412766	UP	579.552	579.552	579.553	31.7778	31.6873	31.8155	3026.49	244042	217512	309267	132846			7		M580T32	y
579	1	1-O-Hexadecyl-2-desoxy-2-amino-s	1.3763	0.460798	0.428723	0.691354	0.415016	UP	316.321	316.321	316.321	31.7028	31.6873	31.7182	63967.7	3.02514e+06	2.84506e+06	4.16355e+06	3.61362e+06	[30][M]+		7		M316T32	y
580	-	Unknown	1.39628	-0.481589	-0.426527	0.692159	0.415298	DOWN	523.49	523.49	523.49	31.7028	31.6873	31.7182	3222.03	249914	218717	178956	187601			7		M523T32	n
581	-	Unknown	1.39036	-0.475456	-0.428819	0.692187	0.415308	DOWN	696.644	696.643	696.646	31.7028	31.6873	31.7182	2152.76	157312	144672	113115	104587			7		M697T32	y
582	4	TG(12:0/12:0/17:2(9Z,12Z))[iso3] (Triacylglycerol)	1.36333	0.447139	0.426929	0.693389	0.415729	UP	705.6	705.6	705.6	31.7028	31.6873	31.7182	25661.5	1.3831e+06	1.19828e+06	1.88566e+06	1.64962e+06	[55][M]+		7		M706T32	y
583	3	3-Phenyl-4-propylpyridine	1.13275	0.179834	0.416269	0.702437	0.418882	UP	198.127	198.122	198.127	29.1863	29.0168	29.277	1746.16	128792	60340.3	145890	37684.3			12		M198T29	y
584	0	Pelargonic acid morpholide	1.1615	0.215988	0.438677	0.703266	0.419169	UP	228.196	228.196	228.196	11.603	11.603	11.603	412795	6.652e+06	4.22847e+06	7.7263e+06	334533	[13][M]+		5		M228T12	y
585	4	Cycloserine tartrate	1.14251	-0.192208	-0.402147	0.709392	0.421282	DOWN	253.066	253.066	253.066	3.6365	3.63417	3.669	6954.8	475803	156125	416454	202400			40		M253T4_2	y
586	9	PA(17:0/14:1(9Z)) (Phosphatidic acid)	1.25169	-0.32388	-0.424962	0.711417	0.421977	DOWN	633.455	633.454	633.455	23.3807	23.37	23.3913	3628.26	121803	99270.9	97310.3	10504.1			3		M633T23	y
587	7	Ceriporic acid A	1.45636	0.542365	0.397578	0.711886	0.422138	UP	327.251	327.251	327.252	31.4113	31.207	31.4647	3977.21	224354	343149	326788	285295			7		M327T31	y
588	7	Citranaxanthin	1.12604	0.171254	0.388315	0.717662	0.42411	UP	457.35	457.35	457.35	23.487	23.37	23.5015	20164.2	475319	195622	535226	182031	[47][M]+		3		M457T23	y
589	-	Unknown	1.22524	0.293065	0.398269	0.718441	0.424375	UP	627.551	627.551	627.552	31.7182	31.6873	31.8155	4716.14	433412	384716	531165	180889			7		M628T32	y
590	-	Unknown	1.33398	0.415737	0.395174	0.71852	0.424402	UP	578.543	578.541	578.544	29.7028	29.6908	29.7148	1358.11	17725.5	12119.1	23539.1	22414.4			21		M579T30	n
591	1	Laurixamine	1.1055	0.144695	0.385174	0.71999	0.424902	UP	244.263	244.263	244.263	11.9297	11.9212	11.9382	23245.7	446508	140348	493613	158654			11		M244T12	y
592	5	Tripelargonin	1.17889	0.237428	0.388131	0.721269	0.425335	UP	513.412	513.412	513.413	30.5135	30.4965	30.6325	22474.9	541194	366492	638008	228775			46		M513T31	y
593	-	Unknown	1.20756	-0.272094	-0.404122	0.72233	0.425695	DOWN	145.084	145.084	145.084	31.6627	31.4113	31.7182	82616.4	8.40524e+06	1.29259e+06	6.96042e+06	6.05607e+06	[4][M+1]+		7		M145T32	n
594	-	Unknown	1.17563	-0.233429	-0.402757	0.724165	0.426315	DOWN	264.164	264.164	264.164	12.942	12.8927	12.945	18940.8	427888	270919	363966	46583.8	[18][M+1]+		33		M264T13_1	n
595	-	Unknown	1.17179	-0.228709	-0.381613	0.724174	0.426318	DOWN	361.365	361.364	361.365	29.105	29.0168	29.1437	4452.16	339793	184527	289979	130647	[37][M+1]+		12		M361T29	n
596	-	Unknown	1.49175	0.577006	0.376087	0.726436	0.427081	UP	577.535	577.534	577.537	30.6325	30.612	30.8628	3195.65	172035	297974	256844	252524			46		M578T31	n
597	8	1,1'-{Oxybis[(4,1-phenylene)methylene]}bis(2-methyldecahydroisoquinoline)	1.24689	0.318331	0.389245	0.728672	0.427833	UP	501.388	501.377	501.399	29.8157	29.785	29.8463	3924.75	199795	68445.2	249121	208547			21		M501T30	y
598	-	Unknown	1.37749	-0.462045	-0.370215	0.734704	0.429853	DOWN	678.572	678.572	678.572	31.4113	31.207	31.4647	19941.9	1.32138e+06	1.47624e+06	959232	831464			7		M679T31	n
599	-	Unknown	1.63133	-0.70605	-0.385422	0.736783	0.430545	DOWN	370.299	370.299	370.299	31.7967	31.7778	31.8155	12470.1	167788	290617	102984	18782.6			7		M370T32	y
600	1	Lucidine B	1.19792	-0.260526	-0.378096	0.738796	0.431214	DOWN	468.395	468.393	468.396	30.1993	30.1748	30.3378	3340.62	151231	111729	126245	24853.4			17		M468T30	y
601	4	(S)-3-Phenylpiperidine	1.31813	-0.398493	-0.356103	0.741878	0.432236	DOWN	162.127	162.127	162.127	31.6873	31.4647	31.7182	6839.14	453306	437975	343875	302455			7		M162T32	y
602	-	Unknown	1.13859	0.187247	0.361564	0.751443	0.435382	UP	251.181	251.181	251.181	11.1518	11.025	11.285	319392	5.24836e+06	3.45957e+06	5.97573e+06	415280	[16][M+1]+		1		M251T11	n
603	-	Unknown	1.20933	0.274212	0.351105	0.751853	0.435516	UP	458.351	458.35	458.353	31.748	31.6873	31.8155	2523.29	162675	156729	196857	62210.9			7		M458T32	y
604	2	3-Oxooctanoic acid glycerides	1.51555	-0.59984	-0.357705	0.753989	0.436214	DOWN	250.141	250.14	250.141	6.96967	6.942	6.99733	24998.7	217791	356003	143775	41354.8			18		M250T7	y
605	2	Ceramide (d18:1/22:0)	1.23051	-0.299253	-0.333828	0.755312	0.436645	DOWN	622.612	622.61	622.614	29.7028	29.6908	29.7148	757.002	14334.3	10479.4	11542.7	9998.4			21		M623T30_2	y
606	-	Unknown	1.15913	0.213042	0.349855	0.759544	0.43802	UP	229.199	229.199	229.199	11.603	11.603	11.603	67430.1	1.02099e+06	802223	1.18345e+06	58411	[13][M+1]+		5		M229T12	n
607	-	Unknown	1.05379	-0.0755934	-0.339772	0.75989	0.438132	DOWN	685.435	685.435	685.435	25.6011	25.5978	25.6043	1790.63	162103	14990.2	153828	39430.3			35		M685T26	y
608	0	Docosanedioic acid	1.20204	-0.265483	-0.30889	0.773243	0.442425	DOWN	371.316	371.316	371.316	29.5211	29.5012	29.541	43711.7	586273	356562	487626	422890	[40][M]+		8		M371T30	y
609	-	Unknown	1.12554	0.170624	0.294513	0.787349	0.446889	UP	595.584	595.584	595.584	31.3034	31.207	31.3998	2043	195004	127279	219486	67305.5			41		M596T31	y
610	2	Guanidine, 1-(4,6-dimethyl-2-pyrimidinyl)-3-(p-fluorophenyl)-	1.10807	0.14805	0.290693	0.789438	0.447544	UP	260.131	260.131	260.131	18.7477	18.578	18.9107	6189.81	304086	170894	336949	95583.3			23		M260T19_1	y
611	-	Unknown	1.1486	-0.199883	-0.291456	0.796925	0.449879	DOWN	159.099	159.099	159.1	31.6627	31.4113	31.7182	62373.5	5.91684e+06	730059	5.15122e+06	4.49093e+06	[6][M+1]+		7		M159T32	n
612	1	Sodium capryloyl proline	1.06717	-0.0937855	-0.276009	0.797516	0.450062	DOWN	264.157	264.157	264.157	8.05475	7.98733	8.12217	14146.6	740525	170881	693917	237372			6		M264T8	y
613	-	Unknown	1.06585	-0.0919998	-0.275165	0.79758	0.450082	DOWN	520.582	520.581	520.582	29.5012	29.285	29.6022	3774.45	304356	93299.1	285553	72823.5			8		M521T30	n
614	1	2-(octadecylsulfanyl)naphthalene	1.05923	-0.0830094	-0.273607	0.798026	0.450221	DOWN	413.324	413.324	413.324	23.5453	23.372	23.611	17839.6	497662	119146	469836	129744	[45][M]+		47		M413T24	y
615	0	C16 Sphinganine	1.10208	0.140232	0.285381	0.80181	0.451392	UP	274.274	274.274	274.274	11.603	11.603	11.603	1.00508e+06	1.54611e+07	9.54031e+06	1.70394e+07	861818	[20][M]+		5		M274T12	y
616	-	Unknown	1.14897	0.200347	0.27733	0.804604	0.452253	UP	561.517	561.515	561.519	31.7028	31.638	31.8155	16987.6	791508	711792	909545	191848			7		M562T32	n
617	2	N,N-Dimethylaniline	1.20773	0.272299	0.263106	0.805926	0.45266	UP	122.096	122.096	122.096	31.6873	31.638	31.7182	21053	1.40672e+06	1.22196e+06	1.69897e+06	1.48595e+06			7		M122T32	y
618	6	Cassaidine	1.07591	0.105553	0.269682	0.807101	0.453021	UP	408.308	408.308	408.309	25.7175	25.6897	25.9018	27854.5	851128	384673	915734	155568			35		M408T26	y
619	-	Unknown	1.21749	-0.283907	-0.260896	0.807679	0.453198	DOWN	620.531	620.53	620.531	31.7028	31.6873	31.7182	2942.17	159626	148328	131092	117829			7		M621T32	y
620	0	Methanol, (4,6-bis(bis(butoxymethyl)amino)-s-triazin-2-ylimino)di-	1.16258	0.217324	0.267241	0.808996	0.453602	UP	531.387	531.387	531.387	23.4912	23.487	23.702	4094.75	154861	151799	180037	59859.6			3		M531T23	y
621	0	Palmitylstearylamine	1.09013	0.124501	0.258599	0.809621	0.453794	UP	494.566	494.566	494.566	29.1565	29.105	29.285	19427	735493	267291	801783	354533	[49][M]+		12		M495T29	y
622	5	2,3-Diaceto-1-stearin	1.0374	-0.0529712	-0.256939	0.814943	0.455418	DOWN	443.334	443.334	443.334	21.7758	21.636	22.0477	26726.1	890053	196767	857966	89831.9			43		M443T22	y
623	2	Metkephamid acetate ester	1.20852	0.273245	0.246234	0.818082	0.456372	UP	643.292	643.292	643.293	29.8463	29.6255	29.8875	3146.77	101288	94049.3	122431	115211			21		M643T30	y
624	0	6-Methylquinoline	1.19824	0.260922	0.245801	0.818544	0.456512	UP	144.081	144.081	144.081	31.7028	31.6873	31.7182	713831	5.09817e+07	4.41677e+07	6.10885e+07	5.58682e+07	[4][M]+		7		M144T32	y
625	-	Unknown	1.13102	0.177629	0.256279	0.818741	0.456571	UP	579.553	579.552	579.554	28.4879	28.4783	28.4975	1098.21	56925	49298.6	64503.9	13902.6			49		M580T28	y
626	-	Unknown	1.1597	0.213746	0.259025	0.819166	0.4567	UP	430.322	430.322	430.323	31.3998	31.289	31.4113	2124.48	159097	169358	184628	21506.9	[46][M+1]+		7		M430T31	n
627	0	Ile Lys Lys Val	1.04726	-0.0666209	-0.259429	0.819362	0.456759	DOWN	487.36	487.36	487.361	21.4275	21.289	21.5118	15212.2	752955	226316	718975	15712.2			44		M487T21	y
628	1	N-Allylbenzylamine	1.20487	-0.268882	-0.242019	0.821145	0.457299	DOWN	148.112	148.112	148.112	31.7028	31.6873	31.7182	8638.43	676828	639616	561724	519113			7		M148T32	y
629	5	Coumoxystrobin	1.11532	-0.157452	-0.240924	0.824859	0.458419	DOWN	437.194	437.194	437.194	14.7601	14.744	14.7762	1.02871e+06	2.56745e+07	1.68245e+07	2.30199e+07	9.00776e+06			4		M437T15	y
630	-	Unknown	1.23666	0.306445	0.234269	0.827778	0.459296	UP	673.451	673.451	673.452	28.9792	28.843	29.1565	9157.4	394167	386550	487450	571165			12		M673T29	y
631	-	Unknown	1.12572	-0.170851	-0.244577	0.829466	0.459802	DOWN	632.589	632.587	632.591	29.7028	29.6908	29.7148	975.254	18928.2	862.351	16707.9	15700.2			21		M633T30	n
632	-	Unknown	1.09723	-0.133872	-0.239621	0.832467	0.4607	DOWN	575.413	575.413	575.413	21.4449	21.289	21.72	20338.2	497715	316871	453608	35152.2			44		M575T21	n
633	0	Benzene, 1-[3-(2-propenyloxy)-1-p	1.04494	0.0634175	0.234018	0.833358	0.460965	UP	241.083	241.083	241.084	8.049	7.98733	8.12217	48159.1	1.56301e+06	160112	1.63325e+06	494591			6		M241T8	y
634	-	Unknown	1.17198	0.228953	0.222671	0.834923	0.461431	UP	549.874	549.874	549.874	29.5211	29.5012	29.541	2505.24	45779.9	40095.8	53671.6	46482			8		M550T30	n
635	0	Melleolide M	1.10739	-0.147165	-0.220246	0.839388	0.462757	DOWN	453.168	453.168	453.168	14.7601	14.744	14.7762	757384	1.90803e+07	1.27624e+07	1.723e+07	6.99044e+06			4		M453T15	y
636	4	Cer(d18:2/18:1)	1.06822	0.0952073	0.212873	0.84311	0.463857	UP	562.517	562.517	562.518	26.7	26.5955	26.7307	6241.32	183568	57627.1	196091	84031			25		M563T27	y
637	6	Phenol, 4,4',4''-(1-methyl-1-propan	1.06234	-0.0872489	-0.216392	0.846395	0.464825	DOWN	545.402	545.401	545.403	23.2818	23.058	23.4947	15944.2	369469	167364	347787	45912.6			3		M545T23	y
638	3	Benzenamine, N,N-dimethyl-4-[2-(4-quinolinyl)ethenyl]-	1.14344	0.193377	0.209926	0.852786	0.466696	UP	275.153	275.153	275.154	19.4081	19.289	19.5602	51236.9	703610	828012	804533	88194.5			23		M275T19_1	y
639	6	5-(Trifluoromethyl)isoxazole	1.13822	0.186779	0.194614	0.85804	0.468225	UP	138.017	138.017	138.017	29.6159	29.541	29.6908	619.622	10552.7	5590.47	11904.9	10657.2			21		M138T30	y
640	9	Lophocerine	1.08204	0.11375	0.200213	0.859443	0.468632	UP	250.178	250.178	250.178	11.2184	11.1518	11.285	2.69161e+06	4.26817e+07	3.01123e+07	4.61832e+07	3.28882e+06	[16][M]+		1		M250T11_2	y
641	-	Unknown	1.05928	0.083079	0.174085	0.870465	0.471807	UP	495.57	495.569	495.57	29.1243	29.0168	29.285	7545.11	302126	115350	320035	135809	[49][M+1]+		12		M496T29	n
642	-	Unknown	1.1095	-0.149913	-0.175222	0.87251	0.472391	DOWN	511.491	511.49	511.491	28.4879	28.4783	28.4975	1035.19	66168.4	57335.9	59733.8	27536.8			49		M511T28	y
643	2	Benzothiazole	1.04653	-0.065614	-0.167175	0.878696	0.474153	DOWN	136.021	136.021	136.021	31.4322	31.3998	31.4647	41064.6	3.83891e+06	720678	3.66823e+06	1.61489e+06	[3][M]+		7		M136T31	y
644	-	Unknown	1.07846	0.10897	0.165764	0.87975	0.474452	UP	643.601	643.601	643.602	26.1337	26.1307	26.1367	3606.43	65214	21640.3	70330.6	48887			29		M644T26	y
645	10	Butoxamine	1.06441	0.090053	0.167349	0.882145	0.47513	UP	268.188	268.188	268.188	11.1518	11.025	11.285	200477	3.92784e+06	2.60185e+06	4.18083e+06	294181			1		M268T11_2	y
646	6	PE-Cer(d14:2(4E,6E)/19:0)	1.10843	-0.148517	-0.157977	0.883146	0.475412	DOWN	645.493	645.493	645.493	30.2731	30.2083	30.3378	35881.1	558024	496276	503437	334520			17		M645T30	y
647	-	Unknown	1.14021	0.189301	0.151731	0.887726	0.476702	UP	186.119	186.118	186.119	5.41542	5.405	5.42583	47916.9	542740	720636	618838	485066	[9][M+1]+		10		M186T5	n
648	1	C17 Sphinganine	1.1185	-0.16157	-0.14964	0.888402	0.476892	DOWN	288.29	288.29	288.29	31.7028	31.6873	31.7182	197369	1.40519e+07	1.2938e+07	1.25631e+07	1.13826e+07	[25][M]+		7		M288T32	y
649	-	Unknown	1.08329	0.115416	0.148895	0.888854	0.477019	UP	711.46	711.455	711.46	27.1998	27.1505	27.3517	3722.2	254857	178293	276083	170824			51		M711T27	y
650	1	1-Eicosanamine	1.14023	-0.189321	-0.144194	0.893686	0.478372	DOWN	298.346	298.346	298.347	31.7028	31.6873	31.7182	2058.94	127332	160647	111659	98150.7			7		M298T32	y
651	1	Monoethanolamine myristate	1.08506	0.11778	0.142443	0.899568	0.480009	UP	290.269	290.269	290.269	9.61567	9.60133	9.653	149985	1.76423e+06	1.81759e+06	1.91441e+06	177361	[27][M]+		16		M290T10	y
652	-	Unknown	1.07781	-0.108102	-0.128015	0.907626	0.482235	DOWN	539.53	539.528	539.53	31.748	31.6873	31.8155	4907.14	324922	296776	301564	108644			7		M540T32	n
653	-	Unknown	1.05986	-0.0838781	-0.126095	0.908682	0.482526	DOWN	160.107	160.106	160.108	29.0168	28.9792	29.105	2299.36	197075	141955	185944	56806.6	[7][M+2]+		12		M160T29	n
654	1	Guanidine, ((2,6-pyridylidene)dimethylene)di-	1.0292	0.0415236	0.121444	0.909347	0.482708	UP	222.146	222.146	222.147	8.049	7.98733	8.12217	63111.5	1.891e+06	600999	1.94621e+06	508905			6		M222T8	y
655	-	Unknown	1.06508	-0.0909562	-0.120869	0.911923	0.483415	DOWN	458.355	458.355	458.355	29.7028	29.6908	29.7148	1682.07	75580	28231.6	70855.7	61531.8			21		M458T30	y
656	-	Unknown	1.07899	0.109683	0.113268	0.915391	0.484363	UP	531.38	531.372	531.387	18.6615	18.578	18.745	961.759	52201	47798.7	56324.5	41122.5			28		M531T19	y
657	-	Unknown	1.06463	0.0903577	0.112626	0.918707	0.485266	UP	410.435	410.434	410.435	28.4879	28.4783	28.4975	1970.12	96276.5	91662.9	102613	33054.1			49		M410T28	y
658	6	Benzyloctyl adipate	1.05554	-0.0779863	-0.113656	0.919455	0.485469	DOWN	349.235	349.235	349.236	25.6011	25.5978	25.6043	17251.6	1.10921e+06	878669	1.05084e+06	138311			35		M349T26	y
659	-	Unknown	1.05635	0.07909	0.11276	0.91952	0.485487	UP	577.539	577.535	577.54	28.4975	28.4783	28.6255	1238	61971.1	53759.2	65575.6	13250.2			49		M578T28	n
660	-	Unknown	1.02935	-0.0417352	-0.107666	0.920968	0.48588	DOWN	458.353	458.353	458.353	23.4891	23.372	23.5015	5389.7	164336	35321.8	159650	66596	[47][M+1]+		3		M458T23	n
661	2	Benzyl thiocyanate	1.07619	-0.105933	-0.102759	0.923113	0.486461	DOWN	150.037	150.037	150.037	31.7028	31.6873	31.7182	23051.6	2.08275e+06	1.80374e+06	1.93529e+06	1.71e+06			7		M150T32_1	y
662	-	Unknown	1.03222	0.0457573	0.107047	0.923457	0.486554	UP	523.601	523.601	523.601	31.438	31.3998	31.6873	12763.8	695276	350581	717682	92279.8	[51][M+1]+		7		M524T31	n
663	-	Unknown	1.05923	-0.0830212	-0.0997484	0.927524	0.487652	DOWN	523.493	523.493	523.493	28.4879	28.4783	28.4975	915.805	39080.8	34999.4	36895.3	14667.9			49		M523T28	n
664	0	(R)-(+)-1,1,1-Trifluoro-2-octanol	1.06535	0.0913277	0.0896419	0.933485	0.489253	UP	185.115	185.115	185.115	5.42583	5.405	5.4285	500784	6.45277e+06	6.78157e+06	6.87446e+06	4.51637e+06	[9][M]+		10		M185T5	y
665	1	4-(Phenylethynyl)pyridine	1.06763	-0.0944057	-0.0870539	0.934819	0.48961	DOWN	180.081	180.081	180.081	31.7028	31.6873	31.7182	75077.7	4.99097e+06	4.53862e+06	4.67483e+06	4.35504e+06	[8][M]+		7		M180T32	y
666	0	Acetamide, N-decyl-2,2,2-trifluoro-	1.02315	0.033012	0.0801904	0.941987	0.491519	UP	254.173	254.173	254.173	9.653	9.61567	9.7835	36897.7	1.12433e+06	527398	1.15035e+06	194412			16		M254T10	y
667	-	Unknown	1.0569	0.0798427	0.0776487	0.942661	0.491697	UP	619.581	619.58	619.582	29.7028	29.6908	29.7148	1204.69	25301.4	15086.9	26634.7	25630.9			21		M620T30	n
668	-	Unknown	1.06751	0.094248	0.0751643	0.946493	0.492711	UP	141.958	141.958	141.958	0.452917	0.446	0.459833	67862.5	4.21568e+06	1.25594e+06	4.50017e+06	6.43421e+06			31		M142T0	y
669	0	4-Phenylpyridine	1.05387	-0.0756949	-0.0712531	0.946618	0.492744	DOWN	156.081	156.081	156.081	31.7028	31.6873	31.7182	25383.8	1.72171e+06	1.49518e+06	1.6337e+06	1.53019e+06			7		M156T32	y
670	0	1-O-Hexadecyl-2-desoxy-2-amino-sn-glycerol	1.01344	-0.0192586	-0.0663223	0.951159	0.49394	DOWN	316.321	316.321	316.321	13.6973	13.669	13.717	622326	1.16942e+07	1.95093e+06	1.15391e+07	3.54882e+06	[28][M]+		9		M316T14	y
671	1	2,6-Dimethylquinoline	1.04571	-0.0644768	-0.0600782	0.954976	0.494942	DOWN	158.096	158.096	158.096	31.7028	31.6873	31.7182	459680	3.02764e+07	2.71985e+07	2.89531e+07	2.67538e+07	[6][M]+		7		M158T32	y
672	8	Octacosyl carbamimidothioate--hydrogen bromide (1/1)	1.04088	0.0577991	0.0555987	0.958342	0.495821	UP	549.377	549.377	549.377	31.6873	31.4647	31.7182	4560.96	273334	236716	284511	255366			7		M549T32	y
673	1	Ile Ile Lys Lys	1.01452	-0.0208013	-0.0563943	0.96005	0.496266	DOWN	501.376	501.373	501.376	23.4891	23.37	23.4947	10322.1	193332	9193.64	190564	84500.9			3		M501T23	y
674	-	Unknown	1.01353	-0.019383	-0.0538825	0.960953	0.496501	DOWN	667.606	667.606	667.608	29.285	29.1863	29.4172	2850.59	214641	86154.2	211776	32494.8			12		M668T29	y
675	1	Tridodecylamine	1.01571	0.0224909	0.0484399	0.964419	0.497401	UP	522.597	522.597	522.597	29.1016	29.0168	29.1863	6266.21	328911	164282	334079	84590.1			12		M523T29	y
676	-	Unknown	1.03221	0.045731	0.0439769	0.967036	0.498079	UP	182.094	182.094	182.094	31.7028	31.6873	31.7182	4709.65	304872	266502	314694	280410	[8][M+2]+		7		M182T32	n
677	8	4-n-dodecyloxyaniline	1.00791	0.0113736	0.0375713	0.971927	0.49934	UP	278.246	278.245	278.246	22.465	22.248	22.4842	51163.9	1.35201e+06	388186	1.36271e+06	304413			36		M278T22	y
678	-	Unknown	1.0408	0.0576862	0.0361038	0.973259	0.499682	UP	934.879	934.878	934.879	29.9663	29.785	30.1748	1419.64	71469.1	123788	74499.8	76262.2			21		M935T30	n
679	2	Glycerol triundecanoate	1.01232	0.0176647	0.028208	0.979442	0.501266	UP	597.51	597.51	597.511	30.2038	30.1748	30.3378	9203.49	414843	288427	419954	123637			17		M598T30	y
680	6	MG(0:0/18:2(9Z,12Z)/0:0)	1.015	-0.0214776	-0.0206771	0.984495	0.502552	DOWN	355.282	355.282	355.283	31.6873	31.638	31.7182	7316.41	520305	464211	512615	446610			7		M355T32	y
681	2	Glyoxal semicarbosazone	1.00934	-0.0134089	-0.0200745	0.984959	0.50267	DOWN	173.079	173.078	173.079	0.525167	0.525	0.529	32263.2	1.77846e+06	1.06307e+06	1.76201e+06	940803			31		M173T1	y
682	-	Unknown	1.01004	-0.0144149	-0.0138361	0.989624	0.503851	DOWN	668.618	668.618	668.619	31.6873	31.638	31.7182	14535.1	683148	594155	676355	608342			7		M669T32	n
683	1	C17 Sphinganine	1.00496	0.00713176	0.0133003	0.990187	0.503993	UP	288.29	288.29	288.29	29.277	28.9792	29.548	192498	1.72895e+07	5.46318e+06	1.73752e+07	9.72882e+06	[26][M]+		12		M288T29	y
684	2	1,2,3-trimethoxypentane	1.01235	0.0177096	0.0128811	0.990625	0.504104	UP	163.133	163.132	163.133	5.41542	5.405	5.42583	19902.7	386005	592328	390773	245186			10		M163T5	y
685	-	Unknown	1.00767	-0.0110174	-0.0119185	0.991558	0.504339	DOWN	605.568	605.567	605.568	28.4879	28.4783	28.4975	1147.85	65394.9	56732	65003	5027.78			49		M606T28	n
686	-	Unknown	1.00616	-0.00886382	-0.0085392	0.993596	0.504852	DOWN	503.426	503.426	503.426	31.7028	31.6873	31.7182	4315.49	214060	190511	212748	185748			7		M503T32	y
687	3	1,4,8,11-Tetraazacyclotetradecane, 1,4,8,11-tetrakis(phenylmethyl)-	1.00534	-0.00767935	-0.00835291	0.99374	0.504889	DOWN	561.397	561.394	561.397	23.4947	23.303	23.521	1558.41	67401.7	55252.3	67043.9	49522			3		M561T23	y
688	-	Unknown	1.00171	-0.00246027	-0.00856056	0.993838	0.504913	DOWN	607.485	607.484	607.486	29.6159	29.541	29.6908	1439.5	32215	9484.33	32053.7	31223.8			21		M607T30	y

## Sheet: Table S3
Supplementary Table S3. Total identified metabolites in pairwise carbon source comparison between xylose versus sucrose
featureidx	ppm	Putative metabolites	fold	log2fold	tstat	pvalue	qvalue	updown	mzmed	mzmin	mzmax	rtmed	rtmin	rtmax	maxint	dataset1_mean	dataset1_sd	dataset2_mean	dataset2_sd	isotopes	adducts	peakgroup	metlin	name	METLIN_MSMS	usernotes
1	1	Ile Ile Pro Val	2.13188	1.09212	12.6617	0.000404217	0.0721592	UP	441.307	441.306	441.309	30.9502	30.8755	31.121	6984.48	286878	36215.9	611590	25718.5			3		M441T31	y
2	66	PA(15:0/20:3(8Z,11Z,14Z))	12.4817	-3.64174	-10.3906	0.00181563	0.0960139	DOWN	685.435	685.435	685.435	25.394	25.392	25.6323	1236.95	159296	11412.3	12497.6	21646.4			23		M685T25	y
3	1	C17 Sphinganine	3.01297	-1.59119	-7.72395	0.00181584	0.096015	DOWN	288.29	288.29	288.29	28.797	28.6255	28.8587	133980	1.47173e+07	1.71883e+06	4.88465e+06	1.38104e+06	[14][M]+		5		M288T29	y
4	-	Unknown	6.44299	-2.68773	-6.98118	0.00238841	0.0982446	DOWN	652.553	652.553	652.554	31.2111	31.1962	31.226	2480.3	233501	32043.8	36108.7	37035.3			3		M653T31	n
5	-	Unknown	2.13113	-1.09162	-8.20238	0.00278058	0.0992757	DOWN	145.084	145.084	145.084	28.7112	28.6255	28.797	31360.8	3.50578e+06	200787	1.64503e+06	337747	[4][M+1]+		5		M145T29	n
6	32	Isofucosterol glucoside	2.06684	1.04743	5.33705	0.00604241	0.141187	UP	575.412	575.412	575.414	28.1478	27.991	28.169	7036.19	323401	82248.4	668420	75977			6		M575T28	y
7	-	Unknown	12.597	3.65501	8.15963	0.00692982	0.148008	UP	551.632	551.632	551.632	23.3343	23.2907	23.378	1656.55	10483.9	9089.41	133734	24532.7			13		M552T23	n
8	50	Ecalcidene	2.18859	-1.13	-6.10442	0.00910335	0.160625	DOWN	456.37	456.37	456.37	28.6447	28.6255	28.664	3443.76	303645	41710.4	138740	21201.8			5		M456T29	y
9	30	Palmitic acid(d3)	2.1503	-1.10454	-4.88643	0.0100355	0.164784	DOWN	260.259	260.258	260.259	28.8228	28.664	28.8587	16441.7	1.47602e+06	225308	686425	166041			5		M260T29	y
10	-	Unknown	2.67541	-1.41976	-4.56667	0.0108867	0.168108	DOWN	289.293	289.293	289.293	28.664	28.6255	28.8587	25287.6	2.57174e+06	464532	961252	396635	[14][M+1]+		5		M289T29	n
11	-	Unknown	4.13513	2.04793	4.81157	0.0112778	0.169506	UP	551.632	551.632	551.632	28.822	28.7853	28.8587	2350.25	44059.8	40910.3	182741	28610.2			5		M552T29	n
12	1	quinaldine	2.0238	-1.01707	-5.13179	0.0114295	0.170029	DOWN	144.081	144.081	144.081	28.6447	28.6255	28.664	271105	2.94022e+07	4.29877e+06	1.45282e+07	2.59286e+06	[4][M]+		5		M144T29	y
13	3	Convicine	6.1199	2.61351	4.32777	0.0132524	0.179048	UP	306.092	306.091	306.093	7.20817	7.15417	7.26217	6369.56	28933.6	38192.9	177881	45769.2			34		M306T7	y
14	-	Unknown	1.74029	0.799332	5.16575	0.0152734	0.187291	UP	356.285	356.285	356.286	21.9168	21.8088	22.1063	4019.87	165417	18007.7	287873	36899.6	[17][M+1]+		18		M356T22	n
15	34	1α-hydroxy-2β-(3-hydroxypropoxy) vitamin D3 / 1α-hydroxy-2β-(3-hydroxypropoxy)cholecalciferol	2.20036	1.13774	4.56495	0.0181656	0.196747	UP	475.394	475.394	475.395	30.9128	30.8755	30.9502	5043.1	314703	69254.8	692460	125488			3		M475T31	y
16	2	8-Isoquinoline methanamine (hydrochloride)	1.50203	-0.586913	-5.53339	0.0209659	0.204012	DOWN	158.096	158.096	158.096	28.6447	28.6255	28.664	293145	2.3635e+07	726329	1.57354e+07	2.36365e+06	[8][M]+		5		M158T29	y
17	2	Carbazole	1.73165	-0.792145	-4.45311	0.0257443	0.213505	DOWN	168.081	168.08	168.081	28.7434	28.664	28.8228	9833.49	867523	130832	500981	56644.2			5		M168T29	y
18	-	Unknown	1.78462	0.835621	4.27368	0.0274834	0.216299	UP	459.363	459.363	459.364	30.9128	30.8755	30.9502	3305.73	248086	32299.5	442741	71975.2	[19][M+2]+		3		M459T31	n
19	17	TG(12:0/12:0/15:1(9Z))[iso3]	1.96524	0.974706	3.88515	0.0279909	0.217061	UP	679.576	679.576	679.576	31.6835	31.5978	31.7692	6120.86	370285	77475.3	727699	139236			4		M680T32	y
20	77	2,6-nonadienal	3.72718	1.89809	3.27225	0.0317711	0.222106	UP	139.122	139.122	139.123	25.8472	25.8355	25.8588	701.712	33342.7	36529.4	124274	31340.7			16		M139T26	y
21	1	Dextroamphetamine	51.9139	-5.69805	-5.28502	0.0327848	0.223294	DOWN	136.112	136.112	136.112	25.9049	25.904	25.9058	2169.6	119946	38476.3	2045.67	3543.2			16		M136T26	y
22	-	Unknown	8.78716	-3.1354	-4.19532	0.0365229	0.227193	DOWN	118.122	118.122	118.122	28.664	28.6255	28.8897	11992	1.04896e+06	363815	119374	122172			5		M118T29	y
23	6	15(R)-15-methyl Prostaglandin A2	3.87372	1.95372	3.12531	0.0385334	0.229023	UP	349.235	349.235	349.235	20.2097	20.2035	20.2187	259737	2.22549e+06	2.80838e+06	8.62094e+06	2.16228e+06			7		M349T20_1	y
24	1	Sempervirine	2.22211	1.15193	3.25017	0.0386609	0.229134	UP	273.139	273.139	273.139	30.2707	30.2548	30.2867	24026.4	1.91442e+06	1.04092e+06	4.25406e+06	686317			12		M273T30	y
25	17	N-palmitoyl tryptophan	1.63891	0.712735	3.7268	0.0388494	0.229296	UP	443.334	443.334	443.334	21.9052	21.8088	22.1063	36073.7	847339	230055	1.38871e+06	101881			18		M443T22_1	y
26	6	15(R)-15-methyl Prostaglandin A2	4.06582	2.02355	4.76459	0.0412432	0.231246	UP	349.235	349.235	349.235	28.1478	27.991	28.169	28241.2	864460	23380.7	3.51474e+06	963159			6		M349T28	y
27	8	(all-E)-6'-Apo-y-caroten-6'-al	1.30868	0.388115	3.16028	0.043644	0.233015	UP	443.334	443.334	443.334	21.6202	21.607	21.6333	36073.7	813989	72916.9	1.06525e+06	116821			19		M443T22_2	y
28	0	Acetylisoniazid	1.89744	0.924054	3.49754	0.043799	0.233124	UP	180.08	180.08	180.081	31.6835	31.5978	31.7692	88740.1	5.72454e+06	1.06337e+06	1.0862e+07	2.31127e+06			4		M180T32	y
29	1	Hexylamine	2.79279	-1.48171	-3.41542	0.0443599	0.233511	DOWN	102.128	102.128	102.128	28.8099	28.797	28.8228	102584	1.17427e+07	3.4389e+06	4.20463e+06	1.66953e+06			5		M102T29	y
30	-	Unknown	10.2754	3.36112	3.57206	0.0454348	0.234229	UP	542.444	542.444	542.445	31.1508	31.121	31.1807	3226.39	27058.2	46866.1	280754	113737			3		M542T31	y
31	2	α-Erythroidine	1.89096	0.919118	2.81061	0.0482936	0.236002	UP	274.144	274.144	274.145	30.2548	30.086	30.2867	11885.5	829937	324004	1.56938e+06	320419			12		M274T30	y
32	5	Homodolicholide	2.6745	1.41927	2.80415	0.0521283	0.238109	UP	493.35	493.35	493.351	25.5892	25.392	25.6323	3418.75	66511.3	54414.1	177885	42089.3			23		M493T26	y
33	1	Convicine	4.46911	2.15999	2.73008	0.0548904	0.239464	UP	306.093	306.093	306.093	5.6955	5.63883	5.75217	6607.55	48516.7	83240.3	217418	67480.3			2		M306T6	y
34	6	PGE1 Alcohol	2.6111	1.38466	2.76153	0.0564621	0.240182	UP	341.267	341.266	341.268	20.7073	20.6695	20.7452	21744.1	313250	185072	817929	256797			24		M341T21	y
35	-	Unknown	3.17026	1.6646	3.58259	0.056745	0.240307	UP	522.597	522.597	522.598	30.2707	30.2548	30.2867	70449.6	1.3e+06	359204	4.12133e+06	1.31586e+06	[25][M]+		12		M523T30	y
36	37	Methidathion	3.13875	1.65019	2.87542	0.0576401	0.240697	UP	302.98	302.98	302.981	30.2548	30.0503	30.2867	13547	462927	512109	1.45302e+06	305664			12		M303T30	y
37	8	6alpha-Fluoro-11beta,17-dihydroxypregn-4-ene-3,20-dione	4.77067	2.25419	2.62722	0.0584117	0.241024	UP	365.209	365.209	365.21	20.2187	20.2035	20.415	54762.3	402373	696930	1.92085e+06	718656			7		M365T20	y
38	1	Rasagiline	1.4502	-0.536256	-2.64252	0.060311	0.241798	DOWN	172.112	172.112	172.112	28.6447	28.6255	28.664	32714.5	2.48844e+06	395565	1.71592e+06	316097			5		M172T29	y
39	8	PG(16:0/16:1(9Z))	3.47149	1.79556	2.60379	0.0610373	0.242082	UP	721.507	721.507	721.507	23.1893	23.0542	23.378	3239.73	42551.2	45790.4	147716	52887.7			36		M722T23	y
40	48	Methanophenazine	4.07917	2.02828	3.78974	0.0623919	0.242596	UP	539.425	539.421	539.425	30.9502	30.8755	31.121	4123.34	149358	12687.2	609258	209808			3		M539T31	y
41	3	(3R,7R)-1,3,7-Octanetriol	3.87319	1.95352	2.70548	0.0626561	0.242694	UP	163.132	163.132	163.133	5.6535	5.55483	5.75217	24862.5	386378	592481	1.49652e+06	392527			2		M163T6	y
42	-	Unknown	3.13745	1.64959	3.40511	0.0629971	0.242819	UP	523.601	523.601	523.601	30.2707	30.2548	30.2867	29334.1	521988	148619	1.63771e+06	547721	[25][M+1]+		12		M524T30	n
43	5	Polyporusterone E	3.97414	1.99064	3.06619	0.0652763	0.243627	UP	461.324	461.324	461.324	31.6835	31.5978	31.7692	63999.5	1.57302e+06	978907	6.2514e+06	2.45477e+06	[20][M]+		4		M461T32	y
44	-	Unknown	2.8764	1.52427	2.69753	0.065728	0.243781	UP	551.632	551.632	551.632	26.1685	26.1567	26.3528	2845.15	193384	197883	556251	122995			39		M552T26	n
45	29	Oleananoic acid acetate	2.01427	1.01025	3.41462	0.0678651	0.244484	UP	501.408	501.408	501.409	30.9502	30.8755	31.121	5575.32	407476	42222	820765	205343			3		M501T31	y
46	-	Unknown	3.4988	1.80686	2.52296	0.0710459	0.245458	UP	186.119	186.119	186.119	5.6535	5.55483	5.75217	61721.6	918024	1.27384e+06	3.21199e+06	925982	[13][M+1]+		2		M186T6	n
47	6	15(R)-15-methyl Prostaglandin A2	3.81829	1.93293	2.60216	0.072953	0.246005	UP	349.235	349.235	349.235	20.4452	20.415	20.45	259737	2.10554e+06	2.04534e+06	8.03956e+06	3.37898e+06			8		M349T20_2	y
48	-	Unknown	4.13307	2.04721	3.14656	0.073668	0.246203	UP	418.302	418.301	418.302	31.6835	31.5978	31.7692	17383.1	430951	194486	1.78115e+06	717331	[18][M+1]+		4		M418T32	n
49	14	9-oxo-2E-decenoic acid	3.14266	1.65198	2.81626	0.0755514	0.246709	UP	185.115	185.115	185.115	5.6535	5.55483	5.75217	694133	1.01039e+07	1.22507e+07	3.1753e+07	5.21521e+06	[13][M]+		2		M185T6	y
50	-	Unknown	3.07644	-1.62126	-3.03582	0.0767894	0.24703	DOWN	317.325	317.324	317.325	28.6447	28.6255	28.664	7986.14	838204	309620	272459	91223.6	[16][M+1]+		5		M317T29_1	n
51	34	Randilongin	2.57394	-1.36398	-2.754	0.0775012	0.247209	DOWN	613.534	613.534	613.535	28.1584	28.1478	28.169	1588.83	158643	24722.2	61634.2	55777.4			6		M614T28	y
52	13	2-Amino-3-carboxymuconate semialdehyde	4.29709	-2.10336	-2.5198	0.0776889	0.247256	DOWN	186.037	186.037	186.037	31.2111	31.1962	31.226	4020.57	450191	201893	104634	125135			3		M186T31	y
53	4	MG(0:0/18:2(9Z,12Z)/0:0)	2.20495	1.14074	2.41789	0.0819894	0.248277	UP	355.283	355.282	355.283	30.9245	30.8755	30.9502	16268.6	980749	472845	2.1625e+06	702182			3		M355T31_1	y
54	1	4-Phenylpyridine	2.51515	-1.33065	-2.81797	0.0824536	0.248381	DOWN	156.081	156.081	156.081	28.8228	28.664	28.8587	9479.34	821586	286508	326654	102249			5		M156T29	y
55	6	15(R)-15-methyl Prostaglandin A2	2.33262	1.22195	2.88856	0.0869624	0.249339	UP	349.235	349.235	349.236	25.6323	25.6037	25.8355	23765.4	1.17311e+06	904858	2.73641e+06	244824			23		M349T26	y
56	6	(all-E)-6'-Apo-y-caroten-6'-al	1.90003	0.926024	2.26801	0.087219	0.249391	UP	443.333	443.333	443.334	30.9245	30.8755	30.9502	15075.2	1.24201e+06	559872	2.35986e+06	644457			3		M443T31	y
57	35	Hydroxyphthioceranic acid (C33)	3.04622	-1.60702	-2.52155	0.0873264	0.249413	DOWN	511.491	511.49	511.491	28.1584	28.1478	28.169	949.372	80206.9	33044.4	26329.9	16663.2			6		M511T28	y
58	-	Unknown	3.28601	1.71634	2.89143	0.0899984	0.249935	UP	506.354	506.354	506.354	31.6835	31.5978	31.7692	12138.4	359098	112849	1.18e+06	478620	[23][M+1]+		4		M506T32	n
59	4	Cysteinyl-Methionine	3.0208	1.59493	2.31958	0.0921077	0.250326	UP	253.067	253.065	253.068	4.45475	4.404	4.5055	10062.6	318030	402825	961105	261369			31		M253T4	y
60	5	PE-Cer(d14:2(4E,6E)/16:0(2OH))	2.3808	1.25144	2.96075	0.0931284	0.25051	UP	619.441	619.44	619.443	28.3301	28.2542	28.406	6125.51	177333	20222.7	422193	141810			6		M619T28	y
61	7	2,4,6-Trimethylacetophenone imine	2.39941	1.26268	2.61911	0.0939339	0.250652	UP	162.127	162.125	162.128	28.6118	28.406	28.664	3580.48	178556	57468	428431	154930			5		M162T29	y
62	1	5-(6-hydroxy-6-methyloctyl)furan-2(5H)-one	2.08744	1.06174	2.63528	0.0952511	0.25088	UP	227.164	227.164	227.164	10.2633	10.218	10.3087	36514.4	260623	175933	544037	61204.9			17		M227T10	y
63	-	Unknown	2.87162	-1.52186	-2.4722	0.0952686	0.250883	DOWN	131.068	131.068	131.068	28.8099	28.797	28.8228	25420.3	2.13282e+06	883642	742725	409506	[2][M+1]+		5		M131T29	n
64	10	3-Hydroxypancuronium	3.14347	1.65236	2.83306	0.0969495	0.251166	UP	529.442	529.442	529.442	30.9128	30.8755	30.9502	6877.93	282160	70657.5	886962	362944	[26][M]+		3		M529T31	y
65	0	Dextroamphetamine	1.58396	-0.663536	-2.3406	0.0974476	0.251248	DOWN	136.112	136.112	136.112	28.664	28.598	28.8897	7172.32	822911	109307	519528	196097			5		M136T29	y
66	6	1-Oleoyl-2-acetyl-sn-glycerol	1.71836	0.78103	2.45288	0.099181	0.251527	UP	399.308	399.307	399.308	21.9052	21.8088	22.1063	26699.2	736597	341843	1.26574e+06	150836			18		M399T22_1	y
67	6	1-Oleoyl-2-acetyl-sn-glycerol	1.39289	0.478078	2.28295	0.0993299	0.25155	UP	399.308	399.308	399.309	21.6202	21.607	21.6333	26699.2	685432	175294	954729	104956			19		M399T22_2	y
68	1	Isoquinoline	3.46241	-1.79178	-2.77654	0.102771	0.252076	DOWN	130.065	130.065	130.065	28.7112	28.6255	28.797	219352	1.81661e+07	7.95198e+06	5.24666e+06	1.3112e+06	[2][M]+		5		M130T29	y
69	36	CE(20:4)	9.07987	-3.18267	-2.63235	0.104571	0.252339	DOWN	673.616	673.616	673.617	31.2111	31.1962	31.226	1604.33	156008	88493.1	17049.4	23000.1			3		M674T31	y
70	5	Theasapogenol E	4.00098	2.00035	2.53423	0.106599	0.252624	UP	505.35	505.35	505.35	31.6835	31.5978	31.7692	39454.9	899819	550527	3.60016e+06	1.76156e+06	[23][M]+		4		M505T32	y
71	6	MG(0:0/18:2(9Z,12Z)/0:0)	1.45777	0.543766	2.06418	0.108185	0.25284	UP	355.282	355.281	355.283	21.9052	21.8088	22.1063	16950.9	694406	194117	1.01229e+06	182936	[17][M]+		18		M355T22_1	y
72	29	Mayolene-16	1.6263	0.701595	2.73003	0.11005	0.253087	UP	533.472	533.472	533.472	31.6835	31.5978	31.7692	5438.93	409920	14975.5	666653	162193			4		M533T32	y
73	30	Manzamine A	3.95751	1.98459	2.56816	0.110128	0.253097	UP	549.375	549.374	549.376	31.6835	31.5978	31.7692	15860.1	368559	179862	1.45857e+06	712801			4		M549T32	y
74	-	Unknown	1.72237	0.784398	2.16777	0.110816	0.253186	UP	582.475	582.474	582.476	30.9373	30.8755	31.121	2534.92	196221	96947.7	337966	58546.4			3		M582T31	n
75	18	9-Hydroxytridecyl docosanoate	5.60539	-2.48681	-2.31026	0.113821	0.253563	DOWN	539.53	539.53	539.53	31.2111	31.1962	31.226	4907.14	376681	213682	67067.4	90670.9			3		M540T31_1	y
76	-	Unknown	4.84453	2.27636	2.65346	0.114231	0.253613	UP	312.362	312.362	312.362	28.7036	28.6218	28.7853	5143.63	59854.8	17570.5	289969	149176			5		M312T29_2	n
77	-	Unknown	8.8919	3.15249	2.43019	0.114306	0.253622	UP	129.986	129.986	129.986	31.6835	31.5978	31.7692	4539.85	41673.7	72180.9	372913	224776			4		M130T32	y
78	60	Cer(t18:0/26:0)	2.92968	-1.55074	-2.00771	0.115102	0.253718	DOWN	696.644	696.643	696.646	31.2111	31.1962	31.226	2358.79	199083	80319	67821.6	79825.3			3		M697T31	y
79	1	4-Biphenylamine	2.06524	-1.04631	-2.31097	0.116273	0.253856	DOWN	170.096	170.096	170.097	28.8099	28.797	28.8228	9336.96	891347	319739	431595	128458			5		M170T29	y
80	-	Unknown	2.48233	1.3117	2.03101	0.117014	0.253943	UP	550.629	550.627	550.629	23.328	23.2002	23.378	4660.5	107036	107625	265698	82006.6			13		M551T23	n
81	4	Ile Ile Lys Lys	1.99921	0.999429	2.3274	0.117416	0.253989	UP	501.374	501.373	501.376	23.2718	23.0518	23.4955	19961.1	172274	45247.9	344411	119847	[22][M]+		13		M501T23	y
82	16	4-Butyl-5-propylthiazole	2.61855	1.38877	2.3664	0.117845	0.254038	UP	184.113	184.112	184.113	28.3253	28.2542	28.3965	5149.79	184332	70485.8	482683	206685			6		M184T28	y
83	9	PE-Cer(d14:2(4E,6E)/16:0(2OH))	1.35601	0.439366	2.36791	0.118129	0.254071	UP	619.439	619.439	619.441	21.545	21.4562	21.688	10267.4	371352	91633.2	503556	30901.4			19		M619T22	y
84	36	Methyl 3b-hydroxy-13(18)-oleanen-28-oate	2.89819	1.53515	2.42097	0.125352	0.255384	UP	513.412	513.412	513.413	30.086	30.0503	30.2548	63692.1	672137	197111	1.94798e+06	891251			12		M513T30	y
85	1	C17 Sphinganine	9.87234	-3.30339	-2.48908	0.127017	0.255667	DOWN	288.29	288.29	288.29	26.3503	26.35	26.3507	46666	2.84854e+06	1.76855e+06	288538	213622			14		M288T26	y
86	5	1-Oleoyl-2-acetyl-sn-glycerol	2.13654	1.09528	1.92631	0.129176	0.256025	UP	399.308	399.308	399.308	28.3301	28.2542	28.406	8602.47	508747	328926	1.08696e+06	402625			6		M399T28	y
87	-	Unknown	1.78804	0.838375	1.99353	0.130942	0.256309	UP	556.459	556.459	556.459	30.9245	30.8755	30.9502	3024.72	252169	90832.4	450887	146829			3		M556T31	y
88	-	Unknown	7.56248	2.91886	2.21417	0.131357	0.256375	UP	550.628	550.627	550.628	31.6835	31.5978	31.7692	7055.32	64051.5	110940	486391	311195			4		M551T32	n
89	30	(S)-Isosclerone	5.70706	2.51275	2.29297	0.134964	0.256931	UP	179.065	179.065	179.065	28.3253	28.2542	28.3965	3050.53	34755.6	29725	198352	119948			6		M179T28	y
90	30	Ethylene glycol distearate	9.89224	-3.3063	-2.31058	0.136147	0.257107	DOWN	595.584	595.583	595.584	31.2111	31.1962	31.226	2043	207827	136949	20876.7	29742.1			3		M596T31	y
91	11	2,2'-(3-methylcyclohexane-1,1-diyl)diacetic acid	12.8025	3.67836	2.32228	0.136605	0.257175	UP	215.125	215.125	215.125	28.3253	28.2542	28.3965	6076.12	37943.2	65719.6	489159	330055			6		M215T28	y
92	7	(all-E)-6'-Apo-y-caroten-6'-al	2.58406	1.36964	2.23279	0.141299	0.257844	UP	443.334	443.333	443.334	28.3253	28.2542	28.3965	8452.27	364315	107418	941414	434597			6		M443T28	y
93	-	Unknown	2.38705	-1.25523	-1.82658	0.14312	0.258092	DOWN	618.57	618.57	618.57	31.2111	31.1962	31.226	2060.88	223014	92721.6	93294.4	80828.9			3		M619T31	n
94	7	Arginyl-Hydroxyproline	2.1429	1.09956	2.21966	0.146562	0.258547	UP	288.165	288.164	288.165	24.0262	23.964	24.0883	4383.19	138122	120626	295981	24963.6			33		M288T24	y
95	-	Unknown	2.10333	1.07268	1.79856	0.146802	0.258578	UP	519.459	519.459	519.459	28.1584	28.1478	28.169	2757.03	66514.9	48278.7	139903	51614			6		M519T28	y
96	2	Dextroamphetamine	2.14728	-1.10251	-1.8748	0.147343	0.258647	DOWN	136.112	136.112	136.112	31.121	30.9245	31.1962	11336.8	1.4271e+06	375216	664476	596331			3		M136T31	y
97	3	Phenanthridine	3.36109	1.74893	1.98475	0.149523	0.258922	UP	180.08	180.079	180.08	28.3253	28.2542	28.3965	37287.7	868668	724339	2.91967e+06	1.63675e+06	[12][M]+		6		M180T28	y
98	57	26-Hydroxybrassinolide	2.392	1.25822	1.9995	0.151715	0.259191	UP	497.376	497.372	497.376	28.6218	28.4218	28.664	1893.62	44245.4	49690.3	106151	20163.9			5		M497T29	y
99	30	Isofucosterol glucoside	2.24279	1.1653	1.74034	0.15694	0.259804	UP	575.413	575.413	575.419	23.6117	23.4742	23.619	3319.22	140868	126124	315939	120212			38		M575T24	y
100	9	PG(17:0/14:1(9Z))	2.55047	1.35076	2.21174	0.157337	0.259849	UP	707.492	707.491	707.492	23.7703	23.6957	23.8303	1775.94	66451.7	2068.2	169483	80659.3			26		M707T24	y
101	4	Ile Ile Lys Lys	1.40207	0.487562	1.73688	0.157814	0.259903	UP	501.374	501.374	501.374	30.1701	30.0853	30.2548	4721.97	362539	98862.3	508307	106567			12		M501T30	y
102	1	Phenanthridine	1.41064	-0.496349	-1.75087	0.159045	0.26004	DOWN	180.08	180.08	180.081	28.8228	28.797	29.0555	42023.1	3.37073e+06	764954	2.38951e+06	597549			5		M180T29	y
103	29	Dieporeticenin	1.59198	0.670821	1.75516	0.159639	0.260106	UP	573.504	573.504	573.505	30.9128	30.8755	30.9502	5455.63	506576	177681	806459	236657			3		M574T31	y
104	9	α-Erythroidine	1.74942	0.80688	2.13021	0.161098	0.260265	UP	274.146	274.146	274.146	19.4609	19.2727	19.6607	97565.1	1.75811e+06	1.05884e+06	3.07569e+06	162950			10		M274T19	y
105	11	Nordihydrocodeine	1.89815	0.924592	1.72276	0.161373	0.260295	UP	288.163	288.162	288.163	20.6705	20.4452	20.8337	58296	887940	526723	1.68544e+06	604523			8		M288T21	y
106	-	Unknown	7.0724	-2.8222	-2.14628	0.161677	0.260328	DOWN	160.107	160.106	160.108	28.664	28.6255	28.8897	1918.18	186031	128054	26303.8	14744.3	[8][M+2]+		5		M160T29	n
107	8	6α-Testosterone Enanthate	20.183	4.33507	2.16103	0.162376	0.260403	UP	417.297	417.296	417.297	28.4092	28.3965	28.4218	20751.3	76037.8	68673.8	1.53734e+06	1.16921e+06			5		M417T28	y
108	4	TG(12:0/12:0/17:2(9Z,12Z))[iso3] (Triacylglycerol)	3.83825	-1.94045	-1.91921	0.162938	0.260463	DOWN	705.6	705.6	705.6	28.7112	28.6255	28.797	5648.19	378544	233960	98624.3	95294.2			5		M706T29	y
109	-	Unknown	2.08878	1.06266	1.91807	0.164411	0.260618	UP	536.576	536.576	536.577	30.0682	30.0503	30.086	3758.24	105155	38072.5	219646	96121.9			12		M537T30	n
110	11	Norsanguinine	3.60103	1.84841	1.738	0.164828	0.260661	UP	260.131	260.129	260.131	18.2015	18.0508	18.2167	23799.8	208082	313109	749786	439775			22		M260T18	y
111	24	Cyanidin 3-glucogalactoside	1.87193	-0.904525	-2.03577	0.167707	0.260955	DOWN	612.183	612.183	612.183	28.4013	28.3965	28.406	56908.3	3.18037e+06	1.23184e+06	1.69898e+06	266665			5		M612T28	y
112	9	PA(17:0/14:1(9Z)) (Phosphatidic acid)	1.99613	0.997206	2.067	0.171846	0.261361	UP	633.455	633.454	633.455	23.2002	23.0542	23.378	4328.3	121028	100455	241587	10705			36		M633T23	y
113	-	Unknown	2.36228	-1.24018	-1.69991	0.172098	0.261385	DOWN	458.352	458.35	458.353	31.2111	31.1962	31.226	2775.82	224593	76471.8	94942	107717	[19][M+1]+		3		M458T31	n
114	-	Unknown	2.32716	-1.21857	-1.65875	0.172511	0.261425	DOWN	160.107	160.106	160.108	31.1586	30.9245	31.226	3304.72	384280	162668	164996	161147	[7][M+2]+		3		M160T31	n
115	35	Ganoderic acid Mi	1.72846	0.789487	1.83229	0.173614	0.261529	UP	545.402	545.402	545.403	23.2907	23.061	23.4955	16574.2	329755	208439	569968	90083	[27][M]+		13		M545T23	y
116	7	Reticulataxanthin	2.22312	1.15259	1.66529	0.174518	0.261614	UP	473.345	473.344	473.346	23.4737	23.452	23.4955	1949.39	83823.9	66745.8	186351	83165.2			25		M473T23	y
117	1	4-Biphenylamine	2.11598	1.08133	1.7526	0.176401	0.261788	UP	170.096	170.096	170.098	28.3965	28.2542	28.406	6106.31	237669	123306	502903	231311			5		M170T28	y
118	33	Acetylursolic acid	1.81524	0.860162	1.66625	0.179501	0.262066	UP	499.395	499.394	499.398	30.9245	30.8755	30.9502	4237.35	327462	158603	594422	227712			3		M499T31	y
119	33	DG(P-14:0/18:1(9Z))	2.85981	-1.51592	-1.73277	0.180338	0.26214	DOWN	551.521	551.521	551.522	31.2111	31.1962	31.226	2685.36	310194	178305	108334	94451.4			3		M552T31	y
120	4	TG(12:0/12:0/17:2(9Z,12Z))[iso3] (Triacylglycerol)	5.44645	-2.44532	-1.93082	0.180349	0.262141	DOWN	705.6	705.6	705.6	31.2111	31.1962	31.226	14326.4	1.47e+06	1.04783e+06	269768	247563			3		M706T31	y
121	19	1-(8-[3]-ladderane-octanoyl-2-(8-[3]-ladderane-octanyl)-sn-glycerol	1.81578	0.860588	1.64527	0.180716	0.262173	UP	651.547	651.545	651.549	28.4092	28.3965	28.4218	1765.9	88176.1	45514.1	160108	60522.2			5		M652T28	y
122	10	PE-NMe(O-16:0/O-16:0)[U]	3.41518	1.77196	1.80722	0.18114	0.26221	UP	678.573	678.572	678.573	28.4092	28.3965	28.4218	5662.11	125188	108448	427992	269185			5		M679T28	y
123	7	α-Erythroidine	1.69888	0.764583	1.99354	0.182631	0.262339	UP	274.146	274.144	274.146	24.0327	23.971	24.1815	8424.31	630089	381269	1.07045e+06	31831.5			33		M274T24	y
124	-	Unknown	2.21945	1.1502	1.75712	0.184165	0.262469	UP	159.099	159.099	159.1	28.3253	28.2542	28.3965	27099.2	1.30247e+06	645224	2.89076e+06	1.4265e+06	[9][M+1]+		6		M159T28	n
125	59	Epimedoside	116.374	-6.86262	-1.98927	0.184971	0.262537	DOWN	761.22	761.219	761.221	28.6447	28.6255	28.664	696.682	46091.7	40131.8	0	0			5		M761T29	y
126	-	Unknown	1.88054	0.911144	1.84123	0.186677	0.262678	UP	505.442	505.441	505.442	30.9245	30.8755	31.121	8367.17	450712	109320	847579	356972			3		M505T31_2	n
127	2	Leupeptin	1.9521	0.965024	1.77642	0.187062	0.26271	UP	427.303	427.303	427.304	30.2707	30.2548	30.2867	2711.54	130283	44643.5	254325	112403			12		M427T30	y
128	0	Rasagiline	4.65176	2.21778	1.68359	0.190687	0.263001	UP	172.112	172.112	172.112	31.6835	31.5978	31.7692	42552.6	729255	1.26311e+06	3.39355e+06	2.4326e+06			4		M172T32	y
129	-	Unknown	3.57628	1.83846	1.7228	0.191066	0.263031	UP	182.096	182.093	182.099	28.3253	28.2542	28.3965	2504	51800.1	54876.9	185725	122954	[12][M+2]+		6		M182T28	n
130	4	PGF2α Alcohol	3.25834	1.70414	1.64028	0.193278	0.263203	UP	341.267	341.265	341.269	31.6835	31.5978	31.7692	8752.22	215581	259179	702868	444510			4		M341T32	y
131	36	Acetylursolic acid	2.03306	1.02365	1.78868	0.195015	0.263335	UP	499.396	499.395	499.399	28.3453	27.991	28.6218	3431.15	158056	46764.9	321337	151038			6		M499T28	y
132	-	Unknown	187.119	7.54781	1.90969	0.196369	0.263437	UP	934.879	934.879	934.879	28.3301	28.2542	28.406	1071.29	0	0	74191.9	67290.8			6		M935T28	n
133	1	Nervonyl carnitine	4.20564	-2.07232	-1.90466	0.196886	0.263476	DOWN	102.128	102.128	102.128	25.9049	25.904	25.9058	40145.5	2.80784e+06	1.94536e+06	667638	59075.6			16		M102T26	y
134	22	Anhydroeschscholtzxanthin	1.80101	0.848806	1.69937	0.197826	0.263545	UP	531.387	531.383	531.387	30.9245	30.8755	30.9502	8832.46	751581	564651	1.3536e+06	240155			3		M531T31_1	y
135	13	3-Methoxy-4-hydroxyphenylethylene glycol	9.92279	-3.31075	-1.87092	0.201525	0.264415	DOWN	185.079	185.078	185.079	3.66833	3.66367	3.673	25244.9	2.46823e+06	2.05175e+06	248743	110960			21		M185T4	y
136	8	Arachidonoylmorpholine	5.34402	2.41793	1.67425	0.204038	0.26499	UP	374.302	374.3	374.305	31.6835	31.5978	31.7692	2238.38	35071	60744.7	188835	147018			4		M374T32	y
137	11	PE-NMe(O-16:0/O-16:0)[U]	1.66937	0.739306	1.52465	0.204781	0.265159	UP	678.572	678.572	678.572	30.9245	30.8755	30.9502	21163.6	1.76888e+06	1.04135e+06	2.95293e+06	851415			3		M679T31_1	y
138	12	PE-Cer(d14:1(4E)/24:1(15Z)(2OH	2.97204	1.57146	1.59455	0.20778	0.265827	UP	731.579	731.577	731.58	31.6835	31.5978	31.7692	4971.06	133610	134368	397487	253187			4		M732T32	y
139	12	1-Isothiocyanato-3-phenylpropane	1.98615	-0.989974	-1.47966	0.214837	0.267337	DOWN	178.066	178.066	178.067	31.121	30.9245	31.1962	6606.2	646555	243562	325399	286367			3		M178T31	y
140	14	Latanoprost ethyl amide	4.42994	2.14729	1.63997	0.215898	0.267557	UP	418.301	418.301	418.301	23.4848	23.4742	23.4955	2944.82	24613.6	30858.1	109037	83653.2			25		M418T23	y
141	37	(3b,16a,20R)-25-Acetoxy-3,16,20,22-tetrahydroxy-5-cucurbiten-11-one 3-glucoside	3.72569	-1.89751	-1.50211	0.218416	0.268072	DOWN	711.458	711.455	711.46	26.9037	26.8783	26.929	3574.85	254086	179524	67933.4	117664			37		M711T27	y
142	8	PE-Cer(d16:2(4E,6E)/24:0(2OH))	4.14718	2.05213	1.53499	0.218934	0.268177	UP	759.607	759.606	759.608	31.6835	31.5978	31.7692	2427.26	46782.1	81029	195112	146451			4		M760T32	y
143	18	Delphinidin 3-lathyroside 5-glucoside	301.952	-8.23817	-1.75627	0.221126	0.268616	DOWN	760.22	760.219	760.22	28.7112	28.6255	28.797	1861.82	119804	118152	0	0			5		M760T29	y
144	6	PGA2 methyl ester	3.23814	1.69516	1.53469	0.224781	0.269331	UP	349.235	349.235	349.235	31.6835	31.5978	31.7692	33052.9	969347	1.08513e+06	3.13931e+06	2.19549e+06			4		M349T32	y
145	-	Unknown	1.86751	-0.901116	-1.47981	0.228066	0.269958	DOWN	131.068	131.068	131.068	31.121	30.9245	31.1962	54872.8	6.22379e+06	1.74134e+06	3.33253e+06	2.90169e+06	[1][M+1]+		3		M131T31	n
146	7	Citranaxanthin	2.15744	-1.10932	-1.56145	0.228655	0.270068	DOWN	457.35	457.349	457.35	31.2111	31.1962	31.226	7667.18	621300	138177	287847	343106	[19][M]+		3		M457T31	y
147	58	1-(10-methyl-hexadecanoyl-2-(8-[3]-ladderane-octanyl)-sn-glycerol	1.57786	-0.657966	-1.4233	0.230275	0.27037	DOWN	617.586	617.586	617.586	25.9049	25.904	25.9058	3596.12	94845.2	32651.4	60110.2	26844.8			16		M618T26	y
148	20	Phytoene 1,2-epoxide	1.83232	-0.873671	-1.49587	0.234494	0.271141	DOWN	561.514	561.506	561.517	31.1586	30.9502	31.226	17364	1.09259e+06	252337	596155	516466			3		M562T31	y
149	31	Isofucosterol glucoside	1.61412	0.690749	1.47127	0.235635	0.271345	UP	575.413	575.413	575.414	21.486	21.254	21.688	20338.2	497715	316871	803372	170511			19		M575T21	y
150	64	26-Hydroxybrassinolide	2.87106	1.52158	1.46907	0.238788	0.271901	UP	497.379	497.379	497.379	31.6835	31.5978	31.7692	4714.16	134992	135714	387951	265574			4		M497T32	y
151	14	SM(d18:0/14:0)	2.22142	1.15148	1.52627	0.238967	0.271932	UP	677.569	677.564	677.569	28.3453	28.2542	28.3965	12426.4	437373	216015	971592	566454			6		M678T28	y
152	6	27-Nor-5b-cholestane-3a,7a,12a,24,25-pentol	1.7792	0.831232	1.38254	0.239294	0.271989	UP	439.339	439.338	439.339	30.0853	30.0503	30.2548	3172.97	129065	92082.8	229633	85992.4			12		M439T30	y
153	3	Benzyl thiocyanate	2.12265	-1.08587	-1.50128	0.246109	0.273145	DOWN	150.037	150.037	150.037	28.8099	28.797	28.8228	9570.94	445860	255211	210049	94254.8			5		M150T29	y
154	21	Lys Lys Lys Lys	1.55331	0.635349	1.62062	0.246122	0.273147	UP	531.387	531.384	531.387	21.486	21.254	21.688	24325.6	614097	362840	953885	15026.8			19		M531T21	y
155	4	ecdysone palmitate	1.70379	0.768745	1.36166	0.247014	0.273295	UP	703.548	703.547	703.548	28.1478	27.991	28.169	3093.37	174200	100084	296800	119596			6		M704T28	y
156	43	Orlistat	5.34	-2.41684	-1.49895	0.248401	0.273522	DOWN	496.421	496.421	496.421	23.1474	23.0518	23.243	3312.27	44794.9	39924	8148.55	14113.7			36		M496T23	y
157	-	Unknown	1.82118	-0.864871	-1.55301	0.248433	0.273527	DOWN	576.521	576.518	576.522	31.121	30.9245	31.226	2833.13	358529	41344.2	196734	175648	[28][M+1]+		3		M577T31	n
158	28	GlcCer(d18:1/12:0)	1.81939	0.863454	1.42113	0.251209	0.273975	UP	644.492	644.491	644.492	30.9245	30.8755	30.9502	1550.15	101501	90591	184911	46127.6			3		M644T31	y
159	11	PE-Cer(d15:2(4E,6E)/24:0(2OH))	2.86395	1.518	1.43078	0.255508	0.274653	UP	745.594	745.592	745.595	31.6835	31.5978	31.7692	3373.77	98301.1	89919.7	281908	203266			4		M746T32	y
160	2	Lucidine B	2.05143	-1.03663	-1.55901	0.257775	0.275003	DOWN	468.394	468.393	468.395	29.7755	29.763	29.788	2908.99	163619	92866.2	79758.5	7500.2			32		M468T30	y
161	7	6α-Testosterone Enanthate	3.98313	1.9939	1.45312	0.26031	0.275387	UP	417.297	417.297	417.297	31.6835	31.5978	31.7692	63091	1.15653e+06	1.34405e+06	4.60712e+06	3.88713e+06	[18][M]+		4		M417T32	y
162	5	MG(0:0/18:2(9Z,12Z)/0:0)	1.14431	0.194474	1.41125	0.261417	0.275553	UP	355.282	355.282	355.283	21.6202	21.607	21.6333	16950.9	673096	47505.2	770229	109338			19		M355T22_2	y
163	2	Benzyl thiocyanate	1.86768	-0.901251	-1.30679	0.263094	0.275803	DOWN	150.037	150.037	150.037	31.1962	31.121	31.226	20168	2.54024e+06	1.01138e+06	1.35997e+06	1.19346e+06			3		M150T31_1	y
164	2	Arachidonoylmorpholine	1.63599	0.710168	1.51386	0.265721	0.276187	UP	374.305	374.302	374.306	22.5033	22.3845	22.6927	6167.01	159761	115380	261368	14212.4			15		M374T23	y
165	16	5a-androstane	1.57514	0.655478	1.36392	0.267852	0.276495	UP	261.262	261.261	261.262	30.1701	30.0853	30.2548	4155.37	219260	143390	345364	71304.5			12		M261T30	y
166	-	Unknown	2.62703	-1.39344	-1.36887	0.268755	0.276624	DOWN	523.49	523.49	523.49	31.2111	31.1962	31.226	2398.24	267111	189291	101545	89757.4			3		M523T31	y
167	1	Vinaginsenoside R12	8.59342	-3.10323	-1.51265	0.269168	0.276683	DOWN	673.451	673.451	673.452	28.7112	28.6255	28.797	9157.4	389258	393555	45297.2	15239.6			5		M673T29	y
168	8	Polyporusterone E	2.77079	1.4703	1.48858	0.271413	0.276999	UP	461.323	461.322	461.323	22.598	22.5033	22.6927	44597.8	314815	80405.5	872285	643648			15		M461T23	y
169	39	Vitamin D3 glucosiduronate	1.53327	0.616616	1.29723	0.272569	0.277161	UP	561.4	561.396	561.402	30.9373	30.8755	31.121	4399.1	427913	251170	656108	172472			3		M561T31	y
170	10	β-Cryptoxanthin	4.30851	2.10719	1.44286	0.273611	0.277305	UP	553.446	553.445	553.447	31.0356	30.9502	31.121	3881.64	94537.8	87591.6	407185	364948			3		M553T31	y
171	3	Ile Lys Lys Val	2.99905	1.58451	1.48518	0.274919	0.277485	UP	487.362	487.361	487.362	28.797	28.598	28.8228	7777.89	194017	27679.4	581865	451471			5		M487T29	y
172	4	Carbazole	2.45226	1.29411	1.32201	0.275725	0.277595	UP	168.08	168.08	168.08	28.3253	28.2542	28.3965	9712.72	281583	255315	690514	471021			6		M168T28	y
173	14	3-Hydroxyvecuronium	2.20702	1.1421	1.42271	0.276242	0.277666	UP	515.428	515.426	515.43	28.1584	28.1478	28.169	2190.82	56522.1	21302.5	124746	80279.3			6		M515T28	y
174	7	Homodolicholide	2.4909	1.31667	1.29897	0.27705	0.277775	UP	493.349	493.349	493.349	31.6835	31.5978	31.7692	2498.48	87788.4	91183	219002	149321			4		M493T32	y
175	-	Unknown	2.20337	1.13971	1.44959	0.278802	0.278011	UP	632.114	632.114	632.114	28.4013	28.3965	28.406	7322.41	290661	412990	640435	64069.5	[30][M+1]+		5		M632T28	n
176	2	1-Phenylethylamine	1.96584	-0.975144	-1.25045	0.27979	0.278142	DOWN	122.096	122.096	122.096	31.2111	31.1962	31.226	14369	1.63823e+06	822781	833218	752584			3		M122T31	y
177	-	Unknown	5.80924	2.53835	1.39398	0.279927	0.278161	UP	141.958	141.958	141.958	0.436917	0.433667	0.440167	86326	408206	707034	2.37277e+06	2.33638e+06			11		M142T0	n
178	1	Quinoline	1.78651	-0.837142	-1.27925	0.283699	0.278656	DOWN	130.065	130.065	130.065	31.121	30.9245	31.1962	496077	5.44265e+07	1.67521e+07	3.04652e+07	2.7783e+07	[1][M]+		3		M130T31	y
179	-	Unknown	2.19807	1.13624	1.30407	0.285187	0.278848	UP	287.155	287.153	287.158	30.1701	30.0503	30.417	11250.9	694634	989924	1.52685e+06	491757			12		M287T30	y
180	9	Prebetanin	2.15331	1.10655	1.4098	0.289417	0.279385	UP	631.113	631.113	631.113	28.4013	28.3965	28.406	12600.6	495682	695240	1.06736e+06	99644.6	[30][M]+		5		M631T28	y
181	12	PA(O-16:0/19:1(9Z))	4.44355	2.15171	1.38913	0.289634	0.279412	UP	675.524	675.519	675.53	31.6835	31.5978	31.7692	8474.79	116869	104575	519903	491527			4		M676T32	y
182	33	N-stearoyl glutamine	1.38849	0.473522	1.35303	0.290507	0.279521	UP	413.324	413.323	413.324	23.452	23.3653	23.609	20159.6	385517	183301	535288	56211.7			25		M413T23	y
183	25	DG(19:0/20:0/0:0)[iso2]	1.68229	0.750424	1.20676	0.294088	0.279962	UP	667.607	667.606	667.607	28.5807	28.5397	28.6218	4579.55	163262	115074	274653	110992			5		M668T29_2	y
184	6	Orotidine	2.07848	-1.05553	-1.37815	0.295208	0.280098	DOWN	289.068	289.068	289.069	5.5385	5.52217	5.55483	98772.2	1.97968e+06	1.27095e+06	952466	226640			2		M289T6	y
185	2	2-Naphthylamine	1.35411	0.437348	1.22314	0.295707	0.280158	UP	144.081	144.08	144.081	31.6835	31.5978	31.7692	532363	4.42978e+07	1.2719e+07	5.99842e+07	1.82111e+07	[6][M]+		4		M144T32	y
186	85	N-palmitoyl valine	2.99453	1.58233	1.29783	0.297559	0.280381	UP	356.286	356.285	356.286	31.6835	31.5978	31.7692	4132.43	116388	113058	348923	289009			4		M356T32	y
187	9	Dihydrospheroidene	1.5558	0.637658	1.20629	0.297854	0.280416	UP	571.492	571.486	571.495	28.6218	28.3965	28.6255	2171.53	143414	70316.8	223124	90303.4			5		M571T29	y
188	20	1-Hexadecyl-2-arachidonoyl-glycerol	3.12896	1.64568	1.356	0.300869	0.280772	UP	603.547	603.546	603.548	28.5099	28.4218	28.598	2279.31	59925.5	29080.6	187505	160343			5		M604T29	y
189	57	Cer(d18:0/22:0(2OH))	1.78889	0.839061	1.36719	0.302166	0.280923	UP	640.588	640.587	640.588	28.3301	28.2542	28.406	32309.3	955502	106147	1.70928e+06	949025			6		M641T28	y
190	-	Unknown	3.48902	-1.80282	-1.22815	0.303489	0.281076	DOWN	184.89	184.889	184.89	23.0071	22.9532	23.061	2206.82	94735.6	83489.1	26925.7	46636.6			27		M185T23	y
191	-	Unknown	3.26161	1.70558	1.36216	0.303714	0.281102	UP	530.447	530.447	530.447	31.0356	30.9502	31.121	2784.12	98946.9	30350.5	322594	282754	[26][M+1]+		3		M530T31	n
192	20	Tetradecanoylcarnitine	3.00521	-1.58746	-1.36691	0.304093	0.281146	DOWN	372.318	372.318	372.318	29.0411	29.0372	29.045	11509.3	193403	163184	64355.9	10474.3			1		M372T29	y
193	5	2,4,6-Trimethylacetophenone imine	2.27608	-1.18655	-1.17584	0.305536	0.281311	DOWN	162.127	162.127	162.127	31.2111	31.1962	31.226	4992.3	546461	301948	239956	335668			3		M162T31	y
194	-	Unknown	3.84766	1.94398	1.26717	0.305736	0.281334	UP	181.084	181.084	181.084	28.3253	28.2542	28.3965	4354.65	66879.8	97246.1	257840	242227	[12][M+1]+		6		M181T28	n
195	-	Unknown	2.11987	1.08397	1.16437	0.314168	0.282374	UP	502.38	502.38	502.38	23.3007	23.166	23.4742	6068.87	34240.6	33865.8	72585.5	45898.2	[22][M+1]+		13		M502T23	n
196	3	ecdysone palmitate	6.761	2.75724	1.29314	0.31461	0.282428	UP	703.553	703.548	703.557	31.6835	31.5978	31.7692	7199.61	66043.7	114391	448179	498892			4		M704T32	y
197	33	Manzamine A	3.27504	1.71151	1.32715	0.315006	0.282475	UP	549.377	549.377	549.378	31.1962	31.1807	31.226	15860.1	453213	74849.2	1.48416e+06	1.34339e+06			3		M549T31	y
198	5	1α,3α-Dihydroxy-5β-cholan-24-oic Acid	2.39364	1.25921	1.28546	0.315868	0.282578	UP	393.298	393.298	393.298	29.0411	29.0372	29.045	838416	8.572e+06	3.76709e+06	2.05183e+07	1.56497e+07			1		M393T29	y
199	-	Unknown	3.69667	1.88623	1.24891	0.318591	0.282901	UP	462.326	462.325	462.327	31.6835	31.5978	31.7692	19571.5	359217	420074	1.3284e+06	1.27678e+06	[20][M+1]+		4		M462T32	n
200	27	Hydroxyphthioceranic acid (C39)	2.83142	-1.50153	-1.30642	0.319199	0.282973	DOWN	595.586	595.586	595.587	28.7434	28.664	28.8228	1357.08	76251.4	65054.6	26930.5	6609.44			5		M596T29	y
201	6	Caffeoylcycloartenol	1.48125	0.566815	1.2365	0.320225	0.283092	UP	589.429	589.429	589.429	23.0037	22.945	23.1893	16943.1	392801	249802	581837	87834.1			27		M589T23	y
202	5	Theasapogenol E	4.38659	2.1331	1.30638	0.320881	0.283169	UP	505.35	505.339	505.35	28.169	28.1478	28.3965	12590.7	171350	39192.9	751641	768374			6		M505T28	y
203	89	DG(17:2(9Z,12Z)/18:1(9Z)/0:0)[iso2]	2.88276	-1.52745	-1.29578	0.322177	0.283319	DOWN	605.568	605.567	605.568	28.1584	28.1478	28.169	921.439	65394.9	56732	22730.8	5806.11			6		M606T28	y
204	-	Unknown	1.44467	0.530736	1.1398	0.328319	0.284555	UP	494.566	494.566	494.566	28.8228	28.797	28.8897	41870.1	735493	267291	1.06254e+06	418989	[21][M]+		5		M495T29	n
205	2	2-Methylindoline	2.06197	-1.04402	-1.12505	0.331522	0.285186	DOWN	134.097	134.097	134.098	28.664	28.598	28.8228	3397.88	276719	181768	134202	122888			5		M134T29	y
206	-	Unknown	2.21599	1.14795	1.25149	0.33366	0.285601	UP	494.566	494.566	494.566	28.4139	28.406	28.4218	41870.1	738659	162519	1.63686e+06	1.23243e+06			5		M495T28	n
207	8	Stearidonic Acid methyl ester	2.53899	-1.34425	-1.19878	0.334505	0.285765	DOWN	291.229	291.229	291.23	18.8468	18.6453	19.0235	2956.32	137345	114272	54094.3	37552.7			9		M291T19	y
208	-	Unknown	6.14703	-2.61989	-1.24484	0.336104	0.286072	DOWN	507.868	507.868	507.868	28.6447	28.6255	28.664	106295	1.66601e+06	1.92655e+06	270917	237310			5		M508T29	n
209	-	Unknown	2.812	1.4916	1.23904	0.339957	0.286802	UP	520.461	520.461	520.461	31.0356	30.9502	31.121	2939.36	124081	22115.4	348783	313330			3		M520T31	n
210	8	PG(17:0/14:1(9Z))	1.49019	0.575501	1.09337	0.346649	0.288041	UP	707.491	707.491	707.492	21.4844	21.453	21.5158	9979.04	205942	135816	306894	84434.2			19		M707T21	y
211	-	Unknown	2.59198	1.37406	1.19817	0.346954	0.288097	UP	528.429	528.429	528.429	31.0356	30.9502	31.121	2886.07	121077	50205.7	313696	273884			3		M528T31	y
212	2	quinaldine	1.73038	0.791088	1.07806	0.347442	0.288185	UP	144.081	144.08	144.081	28.3253	28.2542	28.3965	240313	1.19398e+07	8.16263e+06	2.06604e+07	1.13875e+07	[5][M]+		6		M144T28	y
213	-	Unknown	2.03178	1.02274	1.19923	0.3481	0.288305	UP	495.57	495.57	495.57	28.4139	28.406	28.4218	14998.6	298779	70540.6	607053	439617	[21][M+1]+		5		M496T28	n
214	-	Unknown	1.41763	0.503486	1.09073	0.354213	0.289397	UP	546.406	546.406	546.406	23.2283	23.061	23.3007	5289.52	112301	65818.3	159202	34853.7	[27][M+1]+		13		M546T23	n
215	3	Sintaxanthin	2.51448	1.33026	1.18022	0.355205	0.289571	UP	431.332	431.332	431.332	31.0356	30.9502	31.121	5164.6	187551	58897.4	471460	412472			3		M431T31	y
216	61	1,2,4-Nonadecanetriol	2.66339	-1.41326	-1.17563	0.355839	0.289682	DOWN	317.324	317.324	317.325	29.0555	28.8897	29.1107	7986.14	493840	448854	185418	70755.7			1		M317T29_2	y
217	33	(5-D-ribonyl)hopane	2.50358	1.32399	1.16398	0.362347	0.290805	UP	543.459	543.458	543.46	31.121	30.9502	31.1962	6738.8	319559	73865.1	799909	710955			3		M543T31	y
218	1	8-Isoquinoline methanamine (hydrochloride)	1.95021	-0.963629	-1.05655	0.364648	0.291195	DOWN	158.096	158.096	158.096	31.2111	31.1962	31.226	388074	3.78855e+07	1.49105e+07	1.94262e+07	2.63328e+07	[7][M]+		3		M158T31	y
219	11	DG(18:0/0:0/18:0) (d5)	2.00184	-1.00132	-1.14732	0.365287	0.291302	DOWN	620.531	620.53	620.531	28.1584	28.1478	28.169	1943.94	103109	76974.5	51507.2	11976.1			6		M621T28	y
220	34	Montecristin	1.32569	0.406742	1.08678	0.366121	0.291442	UP	575.523	575.518	575.524	25.6323	25.6037	25.8355	445.364	37021.6	17797.2	49079.1	7248.13			23		M576T26	y
221	40	CE(20:4)	2.50486	-1.32473	-1.14333	0.366157	0.291448	DOWN	673.619	673.617	673.62	28.8099	28.797	28.8228	974.943	21965.8	19650.7	8822.11	3212.31			5		M674T29	y
222	1	Ile Lys Lys Val	1.296	0.374065	1.08578	0.367575	0.291685	UP	487.361	487.36	487.362	21.9052	21.8088	22.1063	15212.2	795276	349229	1.03068e+06	138026			18		M487T22	y
223	1	8-Isoquinoline methanamine (hydrochloride)	2.23821	1.16234	1.05913	0.370705	0.292202	UP	158.096	158.096	158.096	31.6835	31.5978	31.7692	388074	1.59878e+07	1.38939e+07	3.57843e+07	2.92413e+07	[10][M]+		4		M158T32	y
224	-	Unknown	3.95148	1.98239	1.13543	0.371428	0.29232	UP	522.597	522.597	522.597	28.7434	28.664	28.8228	57621.5	324309	164323	1.2815e+06	1.45088e+06			5		M523T29	y
225	-	Unknown	2.32803	1.21911	1.13076	0.372149	0.292438	UP	517.442	517.442	517.446	31.121	30.9502	31.1962	6697.17	299794	79572.2	697796	604426	[24][M+2]+		3		M517T31	n
226	-	Unknown	2.39602	1.26064	1.13594	0.372735	0.292533	UP	516.431	516.431	516.431	31.0356	30.9502	31.121	2262.46	112030	17161.4	268294	237648	[24][M+1]+		3		M516T31	n
227	17	Latanoprost ethyl amide	2.44763	1.29139	1.13405	0.373202	0.292609	UP	418.302	418.302	418.302	31.2111	31.1962	31.226	17383.1	544409	93446.8	1.33238e+06	1.19984e+06			3		M418T31	y
228	-	Unknown	1.68975	0.756814	0.989325	0.379303	0.293587	UP	184.888	184.888	184.889	31.0356	30.9502	31.121	3647.09	229087	183130	387101	207350			3		M185T31	y
229	-	Unknown	2.8385	1.50513	1.0267	0.381453	0.293925	UP	242.284	242.284	242.284	31.6835	31.5978	31.7692	10069.6	285636	396614	811154	792886			4		M242T32	y
230	8	Norsanguinine	1.54889	0.631231	0.986449	0.382142	0.294033	UP	260.13	260.13	260.13	30.2548	30.0503	30.2867	4915.57	450807	272266	698249	338577			12		M260T30	y
231	6	PGA2 methyl ester	1.67054	0.740316	0.978512	0.384373	0.294381	UP	349.235	349.235	349.236	25.393	25.392	25.394	23765.4	1.0864e+06	840956	1.81487e+06	977503			23		M349T25	y
232	1	Rasagiline	1.60134	0.679276	1.06182	0.385822	0.294604	UP	172.112	172.112	172.112	28.3253	28.2542	28.3965	27731.5	1.90148e+06	516922	3.04492e+06	1.79212e+06			6		M172T28	y
233	-	Unknown	1.33077	0.412261	1.00911	0.389709	0.295198	UP	360.362	360.361	360.363	18.6453	18.492	18.8295	105045	3.14118e+06	1.60418e+06	4.18019e+06	779113			9		M360T19	n
234	-	Unknown	1.51774	0.601922	0.9631	0.390317	0.29529	UP	540.434	540.434	540.434	28.4013	28.3965	28.406	1427.86	93245.2	59068.6	141522	63630.1			5		M540T28	n
235	-	Unknown	2.15088	-1.10493	-0.987514	0.390424	0.295306	DOWN	627.551	627.549	627.552	31.1962	31.1807	31.226	4645.91	514480	249631	238930	413839	[29][M+2]+		3		M628T31	n
236	-	Unknown	1.72087	0.783135	1.00044	0.390743	0.295354	UP	145.084	145.084	145.084	28.3253	28.2542	28.3965	29291.1	1.3004e+06	747254	2.23782e+06	1.44067e+06	[5][M+1]+		6		M145T28	n
237	-	Unknown	2.15593	1.10831	0.972817	0.394064	0.295852	UP	140.545	140.545	140.545	7.07408	7.021	7.12717	13430.7	127956	221626	276435	144110			29		M141T7	n
238	55	Cer(t18:0/24:0)	1.9143	-0.936819	-1.02334	0.397928	0.296423	DOWN	668.618	668.618	668.618	31.2111	31.1962	31.226	18759.5	1.1908e+06	292828	621922	917249			3		M669T31	y
239	74	Cer(d14:1(4E)/22:0(2OH))	2.57335	-1.36365	-1.0181	0.397943	0.296425	DOWN	582.589	582.584	582.59	30.9245	30.8755	31.121	17720.5	367878	361805	143009	124296			3		M583T31	y
240	15	SM(d18:0/12:0)	1.95742	0.968954	0.973431	0.39866	0.29653	UP	649.538	649.529	649.538	28.3965	28.3453	28.4218	11560.9	414948	349073	812227	614688			5		M650T28	y
241	-	Unknown	2.21978	1.15042	1.02126	0.403926	0.297408	UP	638.536	638.536	638.537	31.0356	30.9502	31.121	2719.33	137071	69732.9	304134	274625	[31][M+1]+		3		M639T31	n
242	2	Actinidine	1.64646	-0.719365	-0.965545	0.404196	0.297452	DOWN	148.112	148.112	148.112	31.1586	30.9245	31.226	7142.53	918680	305793	557841	570508			3		M148T31	y
243	17	PE-NMe(O-14:0/O-14:0)	2.12912	1.09026	0.998784	0.408302	0.298124	UP	622.506	622.506	622.507	31.121	30.9502	31.226	3412.6	144074	83641.7	306619	269183			3		M623T31	y
244	-	Unknown	1.86403	-0.898424	-0.956422	0.411764	0.298682	DOWN	159.099	159.099	159.099	31.2111	31.1962	31.226	55655.3	5.09027e+06	1.86648e+06	2.73066e+06	3.84401e+06	[7][M+1]+		3		M159T31	n
245	10	2-Oxoarginine	1.99619	0.997248	1.00611	0.412621	0.298819	UP	174.089	174.088	174.09	30.1701	30.0853	30.2548	5194.16	204909	73538	409037	343630			12		M174T30	y
246	0	17,20-dimethyl Prostaglandin F1α	2.23524	1.16043	0.972876	0.41461	0.299135	UP	385.295	385.294	385.296	28.3253	28.2542	28.3965	4394.52	137564	103084	307489	284420			6		M385T28	y
247	31	Cer(t18:0/22:0(2OH))	1.73602	-0.795783	-0.904386	0.419945	0.299972	DOWN	656.599	656.588	656.609	29.1924	29.1418	29.243	1012.65	60751.1	39225.1	34862.1	30327.3			30		M657T29	y
248	0	Diphenylamine	1.9363	0.953305	0.922938	0.420903	0.300121	UP	170.096	170.096	170.097	31.6835	31.5978	31.7692	18370.1	807576	699547	1.56397e+06	1.23516e+06			4		M170T32	y
249	5	Lys Lys Val Val	2.11212	1.07869	0.977739	0.423275	0.300486	UP	473.347	473.347	473.347	31.0356	30.9502	31.121	5251.4	309579	132365	653736	595128			3		M473T31	y
250	3	N-Butylaniline	1.57939	-0.659371	-0.889274	0.431147	0.301676	DOWN	150.128	150.126	150.128	31.1962	31.1807	31.226	5835.74	682201	269421	431806	406523			3		M150T31_2	y
251	30	Mayolene-16	1.29362	0.371416	0.941365	0.431628	0.301748	UP	533.472	533.472	533.473	28.4218	28.3965	28.6218	2501.4	186241	30118.4	240925	96002.2			5		M533T28	y
252	3	1-Phenylethylamine	1.41682	-0.50266	-0.885998	0.432954	0.301945	DOWN	122.096	122.096	122.096	28.7112	28.6255	28.797	10604.7	1.1632e+06	367328	820993	559122			5		M122T29	y
253	-	Unknown	1.83454	0.875422	0.871901	0.434539	0.302179	UP	651.547	651.546	651.548	31.6835	31.5978	31.7692	5552.18	235676	245484	432601	304585	[32][M+2]+		4		M652T32	n
254	-	Unknown	1.35889	0.442424	0.877278	0.435748	0.302356	UP	667.606	667.606	667.608	28.8897	28.8228	29.045	4579.55	214641	86154.2	291672	125331	[33][M+1]+		5		M668T29_1	n
255	82	22R-hydroxycholesterol(d7)	2.15762	-1.10944	-0.93389	0.435859	0.302373	DOWN	410.435	410.434	410.435	28.1584	28.1478	28.169	1970.12	96276.5	91662.9	44683.1	27462.7			6		M410T28	y
256	38	32,35-anhydrobacteriohopan-11-ene-tetrol	1.93274	0.950649	0.949236	0.439288	0.302872	UP	527.426	527.426	527.429	31.121	30.9502	31.1962	5937.64	306755	73972.9	592746	516571			3		M527T31	y
257	-	Unknown	2.05275	1.03756	0.892353	0.440297	0.303018	UP	159.1	159.099	159.1	31.6835	31.5978	31.7692	55655.3	2.36843e+06	2.10629e+06	4.86206e+06	4.35778e+06	[10][M+1]+		4		M159T32	n
258	35	1-(14-methyl-pentadecanyl)-2-(8-[3]-ladderane-octanyl)-sn-glycerol	1.33084	-0.41234	-0.893244	0.444783	0.303659	DOWN	589.535	589.535	589.536	28.6218	28.4218	28.664	1775.06	148003	27408.2	111210	65869			5		M590T29	y
259	18	PG(O-18:0/17:2(9Z,12Z))	1.97209	0.979727	0.933743	0.445987	0.30383	UP	747.567	747.566	747.568	31.0356	30.9502	31.121	1691.57	97879.6	23711.7	192895	174647			3		M748T31	y
260	7	SM(d18:0/13:0)	3.90293	1.96456	0.936302	0.446552	0.303909	UP	663.548	663.547	663.549	31.2111	31.1962	31.226	49856.7	199448	97812.6	778298	1.06633e+06			3		M664T31	y
261	-	Unknown	1.99189	0.99414	0.850885	0.446594	0.303915	UP	650.541	650.541	650.541	31.6835	31.5978	31.7692	15336.6	534292	641747	1.06452e+06	867807	[32][M+1]+		4		M651T32	n
262	-	Unknown	3.2873	1.7169	0.903758	0.448994	0.304252	UP	243.942	243.941	243.943	28.3453	28.2542	28.3965	11003	227905	284942	749628	958420			6		M244T28	n
263	2	8-Isoquinoline methanamine (hydr	1.52946	0.613019	0.925538	0.451696	0.304628	UP	158.096	158.096	158.096	28.3253	28.2542	28.3965	271042	1.85045e+07	1.18461e+06	2.83018e+07	1.82964e+07	[9][M]+		6		M158T28	y
264	8	4H-1-Benzopyran-4-one, 2,3-dihydro-5,7-dihydroxy-2-(4-hydroxyphenyl)-	1.41539	-0.501204	-0.87895	0.452415	0.304727	DOWN	273.073	273.072	273.074	5.21908	5.13733	5.32517	27418.3	1.49029e+06	800101	1.05292e+06	320455			20		M273T5	y
265	-	Unknown	1.41784	0.503695	0.840432	0.453442	0.304869	UP	666.606	666.604	666.609	28.5807	28.5397	28.6218	9260.29	358494	253944	508287	175540	[33][M]+		5		M667T29	n
266	-	Unknown	1.73698	0.796584	0.830265	0.458198	0.305518	UP	145.084	145.084	145.084	31.6835	31.5978	31.7692	62126.5	2.88414e+06	2.53961e+06	5.00993e+06	3.63552e+06	[6][M+1]+		4		M145T32	n
267	10	PA(O-16:0/22:6(4Z,7Z,10Z,13Z,16Z,19Z))	1.88103	0.911525	0.88456	0.45901	0.305628	UP	707.494	707.494	707.496	31.1807	31.121	31.1962	3625.9	257231	117545	483728	427641			3		M707T31	y
268	19	4-Butyl-5-propylthiazole	1.7614	-0.816723	-0.85351	0.462387	0.306081	DOWN	184.112	184.112	184.112	31.2111	31.1962	31.226	10134.5	864189	296666	490494	697915			3		M184T31	y
269	-	Unknown	1.19862	-0.261371	-0.852718	0.462505	0.306097	DOWN	643.601	643.601	643.602	25.9049	25.904	25.9058	2802.71	64183.7	19855.9	53548.1	8511.08			16		M644T26	n
270	32	Randilongin	1.23009	-0.298762	-0.89939	0.463077	0.306173	DOWN	613.536	613.533	613.536	30.9245	30.8755	31.121	4598.75	634544	9597.27	515852	228375			3		M614T31	y
271	3	MG(0:0/18:2(9Z,12Z)/0:0)	1.271	-0.345965	-0.85611	0.465858	0.306875	DOWN	355.283	355.282	355.284	28.6447	28.6255	28.664	7744.85	542792	220317	427058	79280.8			5		M355T29	y
272	12	PE-Cer(d15:2(4E,6E)/20:0(2OH))	1.48446	0.569943	0.806336	0.472034	0.308997	UP	689.531	689.516	689.533	25.6323	25.6037	25.8355	1099.56	39544.1	34812.4	58898.4	22726.5			23		M690T26	y
273	1	4-Biphenylamine	1.47132	-0.557112	-0.811886	0.478167	0.311078	DOWN	170.096	170.096	170.096	31.2111	31.1962	31.226	18370.1	1.82105e+06	545405	1.23756e+06	1.11894e+06			3		M170T31	y
274	1	4-Phenylpyridine	1.20198	0.265413	0.8142	0.479656	0.31158	UP	156.081	156.081	156.081	30.9128	30.8755	30.9502	21669	1.70444e+06	668566	2.0487e+06	298922			3		M156T31_2	y
275	11	3-Hydroxypancuronium	1.90449	0.929403	0.786034	0.480331	0.311806	UP	529.442	529.438	529.442	28.4218	28.3453	28.6218	4577.96	107654	124231	205278	175620			5		M529T28	y
276	2	D-erythro-Sphingosine C-15	2.35613	1.23642	0.83283	0.492425	0.315856	UP	258.243	258.243	258.244	28.3253	28.2542	28.3965	2230.96	75688.9	6262.39	178333	213379			6		M258T28	y
277	-	Unknown	1.72182	0.783935	0.824882	0.494228	0.316452	UP	612.521	612.521	612.522	31.0356	30.9502	31.121	3024.18	196259	33940.9	337791	295237			3		M613T31	y
278	20	Montecristin	1.09215	0.127176	0.76693	0.495973	0.317026	UP	575.515	575.514	575.519	30.9245	30.8755	30.9502	7188.41	755435	78144.2	825051	136427	[28][M]+		3		M576T31	y
279	15	SM(d18:0/12:0)	1.83866	0.878656	0.746249	0.498461	0.317841	UP	649.538	649.538	649.538	31.6835	31.5978	31.7692	37683.1	1.28942e+06	1.59292e+06	2.37106e+06	1.94039e+06	[32][M]+		4		M650T32	y
280	0	Nervonyl carnitine	1.32476	-0.405734	-0.757585	0.500354	0.31846	DOWN	102.128	102.128	102.128	28.3253	28.2542	28.3965	101113	1.03402e+07	2.91679e+06	7.80533e+06	5.00794e+06			6		M102T28	y
281	0	Ile Lys Lys Val	1.1464	0.197104	0.735272	0.506159	0.32034	UP	487.36	487.36	487.36	21.3475	21.254	21.441	15212.2	704709	144802	807874	195174			28		M487T21	y
282	19	4-Butyl-5-propylthiazole	1.20378	0.267566	0.765896	0.506871	0.320569	UP	184.112	184.111	184.113	28.8099	28.797	28.8228	6623.71	232499	39549	279877	99576.6			5		M184T29_2	y
283	-	Unknown	1.8462	-0.884556	-0.724582	0.513915	0.322819	DOWN	122.964	122.964	122.964	0.516	0.516	0.527167	31057.9	3.08628e+06	2.79799e+06	1.67164e+06	1.89904e+06			11		M123T1	n
284	-	Unknown	1.6483	0.720976	0.76667	0.519181	0.324482	UP	624.521	624.521	624.524	31.121	30.9502	31.1962	3473.41	201945	52139	332732	290837			3		M625T31	n
285	-	Unknown	1.82356	-0.866759	-0.706764	0.521186	0.325111	DOWN	317.325	317.324	317.325	31.2111	31.1962	31.226	8325.92	588957	517598	322911	396470	[15][M+1]+		3		M317T31	n
286	35	(22R)-1α,25-dihydroxy-22-methox	1.6271	0.702299	0.73929	0.527147	0.326966	UP	485.38	485.379	485.38	31.0356	30.9502	31.121	5630.72	239660	96936.6	389817	338178			3		M485T31	y
287	8	Theasapogenol E	2.25424	1.17264	0.734603	0.538262	0.330368	UP	505.348	505.347	505.35	31.2111	31.1962	31.226	39454.9	757590	171398	1.70766e+06	2.23351e+06			3		M505T31_1	y
288	19	Hyperforin	1.74348	0.801972	0.679528	0.539633	0.330783	UP	537.404	537.402	537.409	28.797	28.6218	28.8897	1708.76	61908	64292.6	107935	98134.4			5		M537T29	y
289	3	2-Hexaprenylphenol	1.63882	0.712655	0.723945	0.541988	0.331493	UP	503.426	503.426	503.426	31.1962	31.121	31.226	5598.95	296650	60994.5	486023	448953			3		M503T31	y
290	8	Hercynine	1.75963	-0.815268	-0.673586	0.545514	0.332551	DOWN	198.125	198.123	198.127	31.2111	31.1962	31.226	3219.74	239822	135378	136159	229621			3		M198T31	y
291	69	N-palmitoyl valine	1.15952	0.213525	0.699992	0.547323	0.33309	UP	356.291	356.291	356.293	25.394	25.3693	25.6037	8869.18	362871	137657	420756	39558.5			23		M356T25	y
292	33	4-Methoxycinnamic acid	1.57943	0.659403	0.693399	0.54862	0.333476	UP	179.064	179.064	179.065	31.121	30.9502	31.1962	8593.51	580215	260455	916275	798023			3		M179T31	y
293	-	Unknown	1.56916	0.649994	0.711757	0.548696	0.333499	UP	626.539	626.539	626.54	31.0356	30.9502	31.121	3050.41	209175	33871.2	328097	287407	[29][M+1]+		3		M627T31	n
294	-	Unknown	1.78346	-0.834678	-0.70501	0.550117	0.33392	DOWN	311.928	311.927	311.929	29.285	29.243	29.327	5112.11	473589	503391	265545	88529			30		M312T29_1	y
295	29	18-acetoxy-1α-hydroxyvitamin D3 / 18-acetoxy-1α-hydroxycholecalciferol	1.51157	0.596045	0.644071	0.55462	0.335249	UP	459.36	459.356	459.361	28.4218	28.3965	28.6255	2110.72	92145.6	90661	139284	88602.1			5		M459T28	y
296	6	MG(0:0/18:2(9Z,12Z)/0:0)	1.63277	0.707324	0.697104	0.556347	0.335756	UP	355.282	355.282	355.283	31.1962	31.121	31.226	16268.6	833805	144886	1.36128e+06	1.30256e+06			3		M355T31_2	y
297	42	CerP(d18:1/12:0)	1.7162	0.779219	0.647124	0.55722	0.336106	UP	562.399	562.398	562.4	23.7702	23.6117	23.964	587.022	6790.91	11762.2	12109	8016.3			26		M562T24	y
298	3	N,N-Dimethyl-4-[2-(2-quinolinyl)ethenyl]benzenamine	1.56355	0.644822	0.636245	0.570373	0.341331	UP	275.155	275.153	275.155	30.9502	30.9245	31.121	9937.5	641054	444024	1.00218e+06	877124			3		M275T31	y
299	1	Palmitoyl N-Isopropylamide	1.28387	-0.360505	-0.627736	0.572441	0.342145	DOWN	298.31	298.31	298.31	31.0356	30.9502	31.121	1657.58	172393	91381.2	134276	52067.5			3		M298T31_1	y
300	11	3-Hydroxyvecuronium	1.55239	0.634491	0.649057	0.574605	0.342995	UP	515.426	515.426	515.427	31.121	30.9245	31.1962	5967.24	349892	141579	543036	495592	[24][M]+		3		M515T31	y
301	-	Unknown	1.52865	-0.61226	-0.576724	0.596425	0.351443	DOWN	298.346	298.346	298.347	31.2111	31.1962	31.226	2606.41	181436	117990	118557	147440			3		M298T31_2	n
302	13	PC(O-18:2(9Z,12Z)/0:0)[U]	1.31652	-0.396731	-0.575722	0.596997	0.351661	DOWN	506.354	506.353	506.355	28.4139	28.406	28.4218	11794.7	370723	167895	281593	209078			5		M506T28	y
303	-	Unknown	1.38737	0.472355	0.573655	0.605955	0.355064	UP	388.394	388.394	388.394	20.415	20.2035	20.45	67018.1	1.17526e+06	641935	1.63053e+06	1.21549e+06			8		M388T20	y
304	16	5a-androstane	1.25768	0.330765	0.566361	0.609905	0.356553	UP	261.262	261.261	261.262	28.3253	28.2542	28.3965	2970.14	219527	82052.7	276095	152299			6		M261T28	y
305	17	N-tetradecanoyl-L-Homoserine lactone	1.31262	0.392447	0.591634	0.611427	0.357126	UP	312.259	312.257	312.259	21.8088	21.6333	21.8935	1546.59	90360.3	81635	118609	13222.3			18		M312T22	y
306	3	N-methyl-Aniline	1.33486	0.41669	0.567565	0.6124	0.357491	UP	108.08	108.08	108.08	28.6255	28.598	28.797	11006.9	956710	410023	1.27708e+06	887531			5		M108T29_1	y
307	0	4-Phenylpyridine	1.34117	-0.423494	-0.544266	0.621402	0.360849	DOWN	156.081	156.081	156.081	31.1962	31.121	31.226	21669	2.089e+06	862071	1.55746e+06	1.4554e+06			3		M156T31_1	y
308	1	C17 Sphinganine	1.32986	-0.411273	-0.557457	0.622399	0.361219	DOWN	288.29	288.29	288.29	31.1962	31.1807	31.226	161167	1.94318e+07	5.23724e+06	1.46118e+07	1.40304e+07			3		M288T31	y
309	6	Octadecyl fumarate	1.24964	0.321518	0.553136	0.634029	0.365502	UP	369.298	369.297	369.298	23.524	23.514	23.6117	19681.1	519490	54203.7	649178	402462			25		M369T24_1	y
310	-	Unknown	1.38684	0.471797	0.522373	0.644439	0.369287	UP	540.429	540.429	540.43	30.9502	30.9245	31.121	2731.8	225296	94871.5	312316	272492			3		M540T31_2	n
311	2	N-methyl-Aniline	1.16259	0.217345	0.49869	0.652253	0.372098	UP	108.081	108.08	108.081	29.1915	29.1107	29.2723	12291.9	698852	350416	812480	181546			30		M108T29_2	y
312	78	N,N'-Bis(g-glutamyl)-3,3'-(1,2-propylenedithio)dialanine	1.57107	0.651747	0.491267	0.657071	0.37382	UP	541.121	541.121	541.121	31.2111	31.1962	31.226	164984	2.10011e+06	1.93175e+06	3.29928e+06	3.76079e+06			3		M541T31	y
313	-	Unknown	1.75004	-0.807389	-0.490277	0.658803	0.374436	DOWN	270.279	270.279	270.279	23.2718	23.243	23.3007	47633.4	191137	260628	109219	125803			13		M270T23	y
314	33	Tetradecanoylcarnitine	1.41223	-0.497973	-0.485844	0.662681	0.375811	DOWN	372.323	372.323	372.323	26.3503	26.35	26.3507	2320.18	41847.5	39361.9	29726	17834			14		M372T26	y
315	12	Norsanguinine	1.15355	0.20608	0.470801	0.667551	0.377531	UP	260.131	260.131	260.131	23.977	23.971	24.1815	3399.59	324869	157774	374752	93735.8			33		M260T24	y
316	61	Lys Lys Arg Ser	1.50613	0.590844	0.465737	0.671082	0.378771	UP	518.373	518.371	518.374	23.9705	23.964	23.977	693.924	13210	12672.5	19962.9	21682.1			33		M518T24	y
317	11	DG(18:0/0:0/18:0) (d5)	1.51801	-0.602183	-0.455065	0.672678	0.37933	DOWN	620.531	620.53	620.531	31.2111	31.1962	31.226	2190.09	159626	148328	105109	145101			3		M621T31	y
318	1	Phenanthridine	1.33992	0.42215	0.484078	0.673397	0.379582	UP	180.081	180.081	180.081	31.1962	31.1807	31.226	88740.1	7.05682e+06	1.57179e+06	9.45546e+06	8.43727e+06	[11][M]+		3		M180T31	y
319	73	3,4,3',4'-Tetrahydrospirilloxanthin	1.59948	-0.677605	-0.472103	0.677286	0.380939	DOWN	601.541	601.538	601.545	31.6835	31.5978	31.7692	34844.2	822967	1.08584e+06	514604	317557			4		M602T32	y
320	2	Carbazole	1.31856	0.398961	0.462332	0.684684	0.383504	UP	168.08	168.08	168.081	31.1884	31.121	31.226	21293.9	1.82632e+06	533553	2.40798e+06	2.11276e+06			3		M168T31	y
321	35	Cohibin C	1.36427	-0.448125	-0.439717	0.685887	0.383919	DOWN	577.539	577.539	577.54	28.1584	28.1478	28.169	982.512	61971.1	53759.2	45521.5	36170.9			6		M578T28	y
322	-	Unknown	1.22906	-0.297553	-0.449028	0.694243	0.386787	DOWN	679.577	679.577	679.577	31.2111	31.1962	31.226	5623.31	476247	70046.3	387357	335647	[34][M+1]+		3		M680T31	n
323	11	Glycerol 1,3-didodecanoate 2-decanoate	1.31244	0.392256	0.440948	0.696693	0.387623	UP	611.518	611.518	611.52	31.121	30.9502	31.1962	4319.73	383806	132309	503592	451534			3		M612T31	y
324	33	1-(8-[3]-ladderane-octanyl)-2-(8-[3]-ladderane-octanyl)-sn-glycerol	1.31186	0.391608	0.446048	0.697081	0.387756	UP	637.534	637.533	637.535	31.121	30.9502	31.226	4119.58	332265	67441.4	435751	396148	[31][M]+		3		M638T31	y
325	57	Cer(d18:0/22:0(2OH))	1.19918	0.262046	0.418544	0.70255	0.389612	UP	640.587	640.587	640.587	28.797	28.6255	28.8897	32309.3	1.02383e+06	411746	1.22775e+06	736631			5		M641T29	y
326	-	Unknown	1.1095	-0.149906	-0.403577	0.712295	0.392893	DOWN	540.435	540.434	540.437	28.8433	28.797	28.8897	1704.84	119613	24930.3	107808	44104.5			5		M540T29	n
327	30	Tetrahydro-6-(2-hydroxy-16,19-dimethylhexacosyl)-4-methyl-2H-pyran-2-one	1.2942	-0.372057	-0.405897	0.715345	0.393913	DOWN	523.493	523.493	523.493	28.1584	28.1478	28.169	915.805	39040.5	35061.1	30165.8	14313.3			6		M523T28	y
328	-	Unknown	1.3234	-0.404249	-0.402729	0.719178	0.39519	DOWN	505.442	505.442	505.443	28.9673	28.8897	29.045	46544.3	366344	363146	276820	127933			1		M505T29	n
329	-	Unknown	1.28127	0.357569	0.403864	0.719824	0.395404	UP	181.084	181.084	181.084	31.1586	30.9502	31.226	10984.9	946672	335950	1.21281e+06	1.0908e+06	[11][M+1]+		3		M181T31	n
330	6	Ceriporic acid A	1.3279	0.409141	0.380829	0.724263	0.396875	UP	327.251	327.25	327.252	30.9502	30.9245	31.121	4586.84	317068	280761	420900	379718			3		M327T31	y
331	-	Unknown	1.21	-0.275012	-0.377263	0.733287	0.399843	DOWN	598.509	598.508	598.511	31.121	30.9245	31.1962	2693.6	302927	97018.9	250219	221684			3		M599T31	n
332	-	Unknown	1.25354	0.326008	0.382968	0.735331	0.400511	UP	531.457	531.457	531.457	31.0356	30.9502	31.121	18061.9	630139	165448	789772	702761	[26][M+2]+		3		M531T31_2	n
333	13	SM(d18:0/12:0)	1.25632	0.329199	0.375301	0.735737	0.400643	UP	649.537	649.536	649.538	31.2111	31.1962	31.226	37683.1	1.943e+06	849751	2.44089e+06	2.13491e+06			3		M650T31	y
334	-	Unknown	1.33614	0.418072	0.359274	0.73758	0.401244	UP	934.879	934.869	934.88	30.0857	30.0503	30.2548	1644	96166.2	108139	128536	112512			12		M935T30	n
335	94	DG(16:1(9Z)/17:1(9Z)/0:0)[iso2]	1.24821	0.319856	0.348914	0.744766	0.403576	UP	579.553	579.552	579.554	28.1584	28.1478	28.169	1226.43	56925	49298.6	71219.4	51037.8			6		M580T28	y
336	16	PC(O-12:0/O-20:0)[U]	1.17719	-0.23535	-0.34542	0.749263	0.405026	DOWN	706.6	706.597	706.603	31.6835	31.5978	31.7692	7294.97	495856	308209	421220	212304			4		M707T32	y
337	-	Unknown	1.20544	-0.269565	-0.349697	0.74977	0.405189	DOWN	145.084	145.084	145.084	31.1962	31.1807	31.226	62126.5	7.48446e+06	2.8871e+06	6.20875e+06	5.62044e+06	[3][M+1]+		3		M145T31	n
338	9	Pseudosindorin	1.07512	0.104493	0.338069	0.757541	0.407676	UP	273.073	273.071	273.074	8.10233	8.02	8.22367	4432.01	263535	89997.4	283331	46763.2			35		M273T8	y
339	-	Unknown	1.12302	0.167384	0.307329	0.774015	0.412881	UP	602.541	602.537	602.547	28.1478	27.991	28.169	666.544	45486.2	21425.6	51081.9	23140.8			6		M603T28	n
340	-	Unknown	1.44695	0.533015	0.312639	0.777184	0.413872	UP	602.543	602.54	602.546	31.2111	31.1962	31.226	18973.9	249481	240527	361046	569359			3		M603T31	n
341	18	PA(O-16:0/19:1(9Z))	1.2305	-0.299248	-0.315395	0.778753	0.414361	DOWN	675.52	675.516	675.521	25.6323	25.6037	25.8355	1688.98	72366.9	71729.7	58810.8	19925.7			23		M676T26	y
342	-	Unknown	1.17154	-0.228411	-0.300931	0.789089	0.417565	DOWN	316.321	316.321	316.321	28.6255	28.598	28.797	36492.2	3.32649e+06	674543	2.83941e+06	2.72112e+06	[16][M]+		5		M316T29	y
343	-	Unknown	1.28608	0.36298	0.284822	0.801893	0.421484	UP	286.31	286.309	286.311	31.6835	31.5978	31.7692	23185.6	423328	733225	544774	88391.5			4		M286T32	y
344	5	Boviquinone 4	1.20123	-0.264509	-0.269855	0.802939	0.421802	DOWN	413.266	413.266	413.266	29.0411	29.0372	29.045	464304	2.97368e+06	2.70325e+06	2.47553e+06	1.70743e+06			1		M413T29	y
345	30	1-(14-methyl-pentadecanyl)-2-(8-[3]-ladderane-octanyl)-sn-glycerol	1.15686	-0.210217	-0.260575	0.810511	0.424093	DOWN	589.538	589.535	589.542	31.1807	31.121	31.1962	6361.34	575774	255282	497571	452816			3		M590T31	y
346	57	Cer(d18:0/22:0(2OH))	1.12858	0.174508	0.245581	0.81927	0.42672	UP	640.588	640.587	640.588	23.964	23.7703	23.971	1224.6	68617.1	50573.3	77439.8	36254.5			33		M641T24	y
347	-	Unknown	1.14632	-0.197005	-0.236102	0.832817	0.430737	DOWN	316.321	316.321	316.321	31.1962	31.1807	31.226	48039	4.53703e+06	1.10941e+06	3.95779e+06	4.10195e+06	[15][M]+		3		M316T31	y
348	65	3,4-Dihydrospirilloxanthin	1.14399	0.194079	0.229978	0.836046	0.431686	UP	599.521	599.521	599.523	31.121	30.9502	31.1962	5399.8	520833	177027	595697	535319			3		M600T31	y
349	0	2-Naphthylamine	1.12318	-0.167584	-0.211817	0.845509	0.43445	DOWN	144.081	144.08	144.081	31.1962	31.1807	31.226	532363	6.13786e+07	2.6171e+07	5.46472e+07	4.84233e+07	[3][M]+		3		M144T31	y
350	1	D-erythro-Sphingosine (Sphingosine)	1.12293	-0.167262	-0.212112	0.85009	0.435778	DOWN	286.274	286.274	286.274	28.6255	28.598	28.797	20008.6	1.92239e+06	373199	1.71195e+06	1.67739e+06			5		M286T29	y
351	-	Unknown	1.06669	-0.0931354	-0.202868	0.850223	0.435816	DOWN	520.582	520.581	520.582	29.045	28.8587	29.2187	3481.56	304356	93299.1	285328	132989			1		M521T29	n
352	6	Octadecyl fumarate	1.04943	-0.0695991	-0.170087	0.873897	0.44258	DOWN	369.298	369.297	369.299	23.7762	23.7702	23.964	19681.1	901317	255919	858868	348382			26		M369T24_2	y
353	26	Faradiol laurate	1.09924	0.136506	0.1698	0.87801	0.443739	UP	625.539	625.538	625.543	31.121	30.9502	31.1962	4342.51	421866	141183	463599	401611	[29][M]+		3		M626T31	y
354	85	22R-hydroxycholesterol(d7)	1.08711	-0.120497	-0.148131	0.89072	0.447289	DOWN	410.436	410.436	410.436	31.121	30.9502	31.1962	5296.58	480619	238807	441975	383592			3		M410T31	y
355	-	Unknown	1.06293	-0.0880484	-0.147858	0.895795	0.448695	DOWN	159.099	159.099	159.099	28.7112	28.6255	28.797	41201.4	3.13106e+06	208442	2.94569e+06	2.16151e+06	[8][M+1]+		5		M159T29	n
356	15	PE-Cer(d15:2(4E,6E)/20:0(2OH))	1.07724	-0.107338	-0.142126	0.899899	0.449825	DOWN	689.533	689.528	689.534	31.121	30.9245	31.1807	10913.2	625462	37262.4	580483	546872			3		M690T31	y
357	22	Anhydroeschscholtzxanthin	1.09751	-0.134235	-0.128431	0.904186	0.451002	DOWN	531.387	531.382	531.39	29.0372	28.8587	29.0555	22665.6	549845	423198	500993	504937			1		M531T29	y
358	8	Citranaxanthin	1.03325	-0.0471908	-0.129939	0.907162	0.451816	DOWN	457.35	457.35	457.35	23.3042	23.243	23.3653	20164.2	470340	194858	455204	52314.2			13		M457T23	y
359	8	p-Fluorophenylalanine	1.01825	0.0260904	0.125584	0.909449	0.452439	UP	184.075	184.075	184.076	28.797	28.6255	28.8897	6036.19	284778	24123.5	289975	67494.3			5		M184T29_1	y
360	0	Rasagiline	1.05752	-0.0806794	-0.101172	0.92578	0.456852	DOWN	172.112	172.112	172.112	31.1962	31.1807	31.226	42552.6	4.17587e+06	1.79539e+06	3.94862e+06	3.45143e+06			3		M172T31	y
361	-	Unknown	1.05658	-0.0794068	-0.0965144	0.928835	0.45767	DOWN	532.462	532.461	532.462	31.1508	31.121	31.1807	6301.84	330469	160272	312638	276947	[26][M+3]+		3		M532T31	n
362	21	1-Hexadecyl-2-arachidonoyl-glycerol	1.06347	-0.0887752	-0.0830768	0.937833	0.460064	DOWN	603.547	603.541	603.55	31.1807	31.121	31.1962	5074.96	357055	333963	335614	297151			3		M604T31	y
363	2	Nigrifactin	1.05218	-0.0733758	-0.0819371	0.939096	0.460398	DOWN	176.144	176.143	176.144	31.121	30.9245	31.1962	4140.35	423233	253945	402113	367190			3		M176T31	y
364	28	Isofucosterol glucoside	1.05392	0.0757709	0.075074	0.944058	0.461707	UP	575.415	575.414	575.415	31.121	30.9245	31.1962	7649.35	666493	490393	702301	664831			3		M575T31	y
365	11	PE-NMe(O-16:0/O-16:0)[U]	1.03865	-0.0547136	-0.0759057	0.946075	0.462238	DOWN	678.572	678.572	678.572	31.1962	31.121	31.226	19875.5	1.51702e+06	213755	1.46043e+06	1.27342e+06	[34][M]+		3		M679T31_2	y
366	-	Unknown	1.04929	0.0694169	0.067688	0.949307	0.463086	UP	298.346	298.346	298.347	28.7112	28.6255	28.797	2057.03	31192.9	28950.4	32869.4	31658.4			5		M298T29	n
367	-	Unknown	1.03763	-0.0532938	-0.0694371	0.949607	0.463164	DOWN	360.362	360.36	360.363	23.378	23.2002	23.452	6753.53	376383	126595	362600	319636			25		M360T23	n
368	5	Hercynine	1.05395	0.0758067	0.0662652	0.952105	0.463818	UP	198.125	198.122	198.127	28.664	28.6218	28.8228	2346.33	130021	60174.2	136903	169526			5		M198T29	y
369	64	Cer(d14:1(4E)/22:0(2OH))	1.01787	0.025559	0.061161	0.955712	0.464758	UP	582.583	582.582	582.583	28.3301	28.2542	28.406	4707.04	293851	51816.3	299104	139426			6		M583T28	y
370	-	Unknown	1.02474	-0.0352618	-0.0461317	0.966053	0.467436	DOWN	521.478	521.477	521.479	28.1584	28.1478	28.169	788.615	44969.3	35944	43883.5	19235.2			6		M521T28	y
371	-	Unknown	1.01733	0.0247866	0.0293121	0.978473	0.470618	UP	182.094	182.094	182.094	31.2111	31.1962	31.226	4883.33	364008	165614	370183	325168	[11][M+2]+		3		M182T31	n
372	5	Actinidine	1.016	-0.0228985	-0.028578	0.978578	0.470644	DOWN	148.111	148.111	148.113	28.5397	28.3965	28.664	4246.3	359555	233165	353893	251766			5		M148T29	y
373	2	Glycerol triundecanoate	1.01648	-0.0235851	-0.0269388	0.980273	0.471076	DOWN	597.51	597.509	597.51	29.763	29.5457	29.788	8751.7	476716	217791	468854	456196			32		M598T30	y
374	21	Arachidonic Acid Leelamide	1.00993	0.0142582	0.0182297	0.987056	0.472794	UP	572.494	572.494	572.495	31.121	30.9245	31.1807	2594.84	287517	35467.3	290240	256297			3		M572T31	y
375	9	dimethylamphetamine	1.00665	-0.00956616	-0.0101811	0.992369	0.474132	DOWN	164.142	164.141	164.143	28.4013	28.3965	28.406	3467.56	217023	164106	215589	180575			5		M164T28	y
