# Supplementary material for: Enhancing Genome-Scale Model by Integrative Exometabolome and Transcriptome: Unveiling Carbon Assimilation towards Sphingolipid Biosynthetic Capability of Cordyceps militaris
Source: J Fungi (Basel). 2022 Aug 22;8(8):887. doi: 10.3390/jof8080887 (PMC9409897; doi:10.3390/jof8080887)
Supplement: Supplementary file 1 [file jof-08-00887-s001.zip › Supplementary File S2.xlsx]

## Sheet: Index
Supplementary Information
Enhancing Genome-Scale Model by Integrative Exometabolome and Transcriptome: Unveiling Carbon Assimilation towards Sphingolipid Biosynthetic Capability of Cordyceps militaris
Pattsarun Cheawchanlertfa 1,†, Suwalak Chitcharoen 1,2,†, Nachon Raethong 3, Qing Liu 4, Pramote Chumnanpuen 1,5, Panyawarin Soommat 1,6, Yuanda Song 1,4, Mattheos Koffas 7, Kobkul Laoteng 8,*, Wanwipa Vongsangnak 1,5,*
1 Department of Zoology, Faculty of Science, Kasetsart University, Bangkok 10900, Thailand 2 Program in Bioinformatics and Computational Biology, Graduate School, Chulalongkorn University, Bangkok 10330, Thailand 3 Institute of Nutrition, Mahidol University, Nakhon Pathom 73170, Thailand 4 Colin Ratledge Center for Microbial Lipids, School of Agriculture Engineering and Food Sciences, Shandong Un…
Supplementary File S2: Differentially accumulated metabolites (DAMs) in each pairwise comparison of the cultures using different carbon sources
This file includes Supplementary Tables S1 to S3
	Supplementary Table S1. Differentially accumulated metabolites (DAMs) in pairwise carbon source comparison between xylose versus glucose
	Supplementary Table S2. Differentially accumulated metabolites (DAMs) in pairwise carbon source comparison between sucrose versus glucose
	Supplementary Table S3. Differentially accumulated metabolites (DAMs) in pairwise carbon source comparison between xylose versus sucrose

## Sheet: Table S1
Supplementary Table S1. Differentially accumulated metabolites (DAMs) in pairwise carbon source comparison between xylose versus glucose
featureidx	ppm	Putative metabolites	METLIN ID	KEGG ID	Class	fold	log2fold	tstat	pvalue	qvalue	updown	mzmed	mzmin	mzmax	rtmed	rtmin	rtmax	maxint	dataset1_mean	dataset1_sd	dataset2_mean	dataset2_sd	isotopes	adducts	peakgroup	metlin	name	METLIN_MSMS	usernotes
1	1	Adenosine, 2',3'-dideoxy-2'-(1-pyrrolidinyl)-	421614	-	Nucleosides	5.20966	2.38119	17.7199	7.49258e-05	0.00999914	UP	305.172	305.172	305.172	13.6973	13.669	13.717	31853.5	172113	54413.8	896652	45329			10		M305T14	y
2	0	(2S,3R)-2-aminoheptadecane-1,3-diol	479551	-	Sphingolipids	15.8337	3.98492	15.4985	0.000121334	0.00999914	UP	288.29	288.29	288.29	11.7367	11.735	11.7378	537618	705139	754675	1.11672e+07	893021	[24][M]+		2		M288T12	y
3	0	1,3,5-Triazine-2,4-diamine, N,N,N',N'-tetramethyl-6-nitro-	365214	-	Unknown	673.077	9.39463	86.1697	0.000125418	0.00999914	UP	213.11	213.109	213.11	8.049	7.98733	8.12217	963811	50999	47115.8	3.44231e+07	689287	[9][M]+		6		M213T8	y
4	0	Guanine, 8-(p-nitrophenyl)-	426722	-	Nucleosides	2.73835	1.45331	13.5055	0.000175374	0.00999914	UP	273.073	273.073	273.073	6.04258	6.016	6.06917	17548.6	397019	61433.8	1.08718e+06	63719.7			33		M273T6_1	y
5	2	Phosphorothioic O,O,O-acid--2,3-dichloropropan-1-ol (1/3)	977264	-	Organic acids and derivatives	13.4773	3.75246	19.2079	0.000176415	0.00999914	UP	498.901	498.901	498.901	28.0475	28.0383	28.0567	7972.63	82786.1	80014.8	1.11767e+06	48021.9			55		M499T28	y
6	1	Monoethanolamine myristate	331850	-	Organic nitrogen compounds	16.7922	4.06972	12.2121	0.000259983	0.00999914	UP	290.269	290.269	290.269	9.61567	9.60133	9.653	100989	113862	183736	1.91441e+06	177361	[25][M]+		19		M290T10	y
7	1	n-adenosylaziridine	616838	-	Nucleosides	21.5651	4.43063	18.4004	0.000276934	0.00999914	UP	293.136	293.136	293.136	11.934	11.9212	11.9382	5572.39	13533.7	23441.1	298060	12955.1			11		M293T12	y
8	1	Carbocyclic-3'-amino-adenosine	330779	-	Nucleosides	3.30174	1.72323	13.4472	0.00028566	0.00999914	UP	265.141	265.141	265.141	10.784	10.7832	10.859	107178	1.04988e+06	185636	3.46644e+06	249848			29		M265T11	y
9	-	Unknown	-	-	-	7.56774	2.91986	17.4185	0.000297971	0.00999914	UP	258.274	258.273	258.275	22.4746	22.465	22.4842	9778.31	58219.9	33067.1	440593	18768.8			41		M258T22	n
10	-	Unknown	-	-	-	17.6448	4.14117	15.413	0.000343271	0.00999914	UP	289.293	289.293	289.293	11.7367	11.735	11.7378	95670	116065	113010	2.05049e+06	185699	[24][M+1]+		2		M289T12	n
11	2	Sodium chromate	294644	-	Unknown	14.0909	3.8167	11.4578	0.000353666	0.00999914	UP	162.907	162.907	162.907	19.27	19.14	19.2745	3624.13	49405.8	72825.8	696174	65234.2			21		M163T19	y
12	1	Guanine, 8-(p-nitrophenyl)-	426722	-	Nucleosides	2.55592	1.35384	11.2835	0.000379372	0.00999914	UP	273.073	273.071	273.074	8.01817	7.92117	8.0925	6971.14	284305	45075	726663	50784.5			6		M273T8	y
13	-	Unknown	-	-	-	17.3842	4.11971	11.6578	0.000386238	0.00999914	UP	110.009	110.009	110.009	11.603	11.603	11.603	5360.38	23235.4	35957.8	406430	44140.4			2		M110T12	n
14	3	Oxaziridine-2-sulfonic acid	896580	-	Organic acids and derivatives	326.728	8.35195	44.0611	0.000504872	0.0100334	UP	125.986	125.986	125.986	15.5167	15.488	15.5453	15990.6	14418.5	7236.78	4.71094e+06	184479			27		M126T16	y
15	2	Benzylamine	270150	C15562	Benzene and substituted derivatives	3.20076	1.67842	10.8087	0.000509266	0.0100344	UP	108.081	108.08	108.081	29.544	29.5163	29.5717	30886.7	810640	180955	2.59467e+06	221326			7		M108T30	y
16	-	Unknown	-	-	-	14.8974	3.89699	10.3757	0.000517246	0.0100361	UP	706.604	706.603	706.604	31.4322	31.3998	31.4647	12935.2	106213	183966	1.58657e+06	165004	[64][M+1]+		35		M707T31	n
17	4	Hydroxyethyl pantothenamide monoethanolamide	501154	-	Organic acids and derivatives	1015.56	9.98807	42.938	0.000541956	0.0100411	UP	307.188	307.187	307.188	13.5633	13.471	13.5828	5283.8	0	0	438244	17678.1			10		M307T14_2	y
18	3	Benzenesulfonic acid, 4-methyl-, compd. with N,N-diethylethanamine (1:1)	358553	-	Benzene and substituted derivatives	3.18988	-1.6735	-20.8643	0.000558548	0.0100442	DOWN	274.146	274.146	274.146	19.4081	19.257	19.554	97565.1	3.07569e+06	162950	964203	64593.3			21		M274T19	y
19	-	Unknown	-	-	-	1.54388	-0.626558	-9.80055	0.000613788	0.0100533	DOWN	251.181	251.181	251.181	11.1518	11.025	11.285	323202	9.22579e+06	396810	5.97573e+06	415280	[15][M+1]+		1		M251T11	n
20	3	4-Nitroprocainamide	438370	-	Organic acids and derivatives	981.644	9.93906	40.3394	0.00061396	0.0100533	UP	266.151	266.151	266.151	28.0937	28.0383	28.149	4691.33	0	0	423606	18188.3			55		M266T28	y
21	8	(Prop-2-yn-1-yl)germane	898069	-	Unknown	3098.34	11.5973	39.9038	0.000627427	0.0100553	UP	116.976	116.976	116.976	0.525167	0.525	0.529	6261.77	0	0	1.33702e+06	58034.2			32		M117T1	y
22	5	Phosphoric triamide, N-(bis(dimethylamino)methylene)-N',N',N'',N''-tetramethyl-	416634	-	Organic nitrogen compounds	1.56121	-0.642661	-9.59413	0.000660103	0.0100981	DOWN	250.178	250.178	250.178	11.2184	11.1518	11.285	2.68089e+06	7.21014e+07	3.32829e+06	4.61832e+07	3.28882e+06	[15][M]+		1		M250T11_2	y
23	4	TG(12:0/12:0/17:2(9Z,12Z))[iso3] (Triacylglycerol)	98495	-	Glycerolipids	20.3805	4.34912	10.9102	0.00077233	0.0108566	UP	705.6	705.6	705.6	31.4322	31.3998	31.4647	25661.5	156048	270283	3.18621e+06	397945	[64][M]+		35		M706T31	y
24	0	[2-(2-{[tert-Butyl(dimethyl)silyl]oxy}ethyl)phenyl]boronic acid	805999	-	Unknown	26.1485	4.70866	18.0806	0.000780854	0.0109092	UP	281.174	281.173	281.175	13.7072	13.6973	13.717	3768.98	6688.54	6150.45	178657	15282.7			10		M281T14	y
25	5	Benzenesulfonic acid, 2-[[[3-[[8-[[(2-ethoxyethoxy)carbonyl]amino]-2-hydroxy-1-naphthalenyl]azo]-4-hydroxyphenyl]sulfonyl]amino]-	378242	-	Benzene and substituted derivatives	9.41605	-3.23512	-15.954	0.000856703	0.0113505	DOWN	631.113	631.113	631.113	28.6328	28.6263	28.6393	11537.9	1.09024e+06	96767.1	115785	42755.5	[57][M]+		14		M631T29	y
26	0	1-Propene, 1,1-dichloro-3,3,3-trifluoro-	337400	-	Unknown	132.069	7.04515	26.8826	0.000891263	0.0115368	UP	164.948	164.948	164.948	19.205	19.14	19.27	8850.84	13031.5	22571.2	1.75905e+06	110209			21		M165T19	y
27	0	2-Propenoic acid, 3-[3-(trifluoromethyl)phenyl]-, butyl ester, (2E)-	347542	-	Fatty Acyls	3.35596	1.74673	9.79617	0.00132809	0.0145416	UP	273.11	273.11	273.11	6.14725	6.10267	6.19183	17548.6	236539	52874.9	793818	83143.1			33		M273T6_2	y
28	1	5-(4-benzylpiperazino)-1H-1,2,4-triazol-3-ylamine	424058	-	Unknown	10.5828	3.40365	10.9379	0.00143943	0.0151649	UP	259.166	259.166	259.167	14.3687	14.347	14.3893	2297.42	11007.8	14890.5	118016	8087.57			38		M259T14	y
29	1	Silane, diphenyldi-2-propenyl-	355784	-	Unknown	105.52	6.72138	22.8151	0.00148839	0.0154243	UP	265.141	265.141	265.141	13.5633	13.471	13.5828	57082.5	15565.5	19714.7	1.65766e+06	123094			10		M265T14	y
30	-	Unknown	-	-	-	11.1874	3.4838	22.7801	0.00154431	0.0157105	UP	110.009	110.008	110.009	15.5167	15.488	15.5453	5207.34	120142	92044.2	1.34408e+06	13715.5			27		M110T16	n
31	0	1,4-dimethyl-3-(phenylsulfanyl)-7-(propan-2-yl)azulene	546311	-	Unknown	675.166	9.3991	23.5383	0.00180001	0.0168955	UP	307.152	307.151	307.152	13.693	13.669	13.717	5049.71	0	0	291352	21439			10		M307T14_1	y
32	0	2,2-Dichloroethane-1-peroxol	915537	-	Organohalogen compounds	94.3375	6.55976	21.5415	0.0019354	0.0174517	UP	130.966	130.966	130.966	21.3757	21.289	21.4623	5720.34	10246.1	7948.88	966594	76483.3			48		M131T21	y
33	-	Unknown	-	-	-	13.7816	-3.78468	-16.7006	0.00211643	0.0181304	DOWN	632.114	632.114	632.114	28.6328	28.6263	28.6393	7066.37	652787	60944.6	47366.4	15109	[57][M+1]+		14		M632T29	n
34	-	Unknown	-	-	-	187.746	7.55264	20.6168	0.0022206	0.018491	UP	214.113	214.113	214.113	8.049	7.98733	8.12217	92127	21273	25158.9	3.99393e+06	332799	[9][M+1]+		6		M214T8	n
35	-	Unknown	-	-	-	29.0167	4.85881	14.9623	0.00232014	0.0188173	UP	156.948	156.948	156.948	15.5342	15.488	15.5453	10282.5	92753.6	82411.6	2.6914e+06	289313			27		M157T16	y
37	2	Benzensulfonate	307388	-	Benzene and substituted derivatives	2093.5	11.0317	20.3017	0.00241746	0.0191203	UP	158.003	158.003	158.003	5.81183	5.78867	5.835	14282.3	0	0	903401	77074.4			42		M158T6	y
38	6	{1-[Tri(propan-2-yl)silyl]-1H-pyrrol-3-yl}boronic acid	452948	-	Unknown	1.62502	-0.700456	-8.18981	0.00245219	0.0192248	DOWN	268.188	268.188	268.188	11.1518	11.025	11.285	199269	6.79393e+06	467834	4.18083e+06	294181			1		M268T11_2	y
39	5	Elocalcitol	449112	-	Steroids and steroid derivatives	1.61861	-0.694753	-6.76787	0.00262984	0.019732	DOWN	443.334	443.334	443.334	21.8448	21.636	22.0742	36073.7	1.38871e+06	101881	857966	89831.9			43		M443T22	y
40	1	Methanol, (4,6-bis(bis(butoxymethyl)amino)-s-triazin-2-ylimino)di-	387543	-	Unknown	1.85361	-0.890338	-13.9294	0.00272061	0.0199747	DOWN	531.387	531.385	531.387	21.4449	21.289	21.6625	21546	953885	15026.8	514609	52514.1			48		M531T21	y
41	4	2-carboxybenzenesulfonate	478528	-	Unknown	103.682	6.69602	18.4939	0.00275049	0.0200523	UP	201.992	201.992	201.992	23.9472	23.702	23.9535	2632.92	3215.51	2439.24	333389	30826.2			51		M202T24	y
42	2	Benzensulfonate	307388	-	Benzene and substituted derivatives	148.189	7.21129	18.8567	0.00278702	0.0201457	UP	158.003	158.003	158.003	15.5342	15.488	15.5453	8256.92	14160.9	4402.39	2.09849e+06	191402			27		M158T16	y
43	0	Silane, naphthalenylphenyl-	588494	-	Unknown	11.3716	3.50737	9.61801	0.00284935	0.0203015	UP	235.094	235.094	235.094	5.13492	5.11283	5.157	6062.63	20276.6	16366.5	230578	34152.9			44		M235T5	y
44	1	Morpholine, 4-[[2-[(1,1-dimethylethyl)azo]-3-pyridinyl]azo]-	630178	-	Unknown	2.77921	1.47467	7.02165	0.00286737	0.0203457	UP	277.177	277.177	277.177	14.5237	14.52	14.529	57984.2	504881	132812	1.40317e+06	177370	[21][M]+		34		M277T15	y
45	2	5-{[2-(6-Amino-9H-purin-9-yl)ethyl]amino}pentan-1-ol	469551	-	Benzene and substituted derivatives	5.25838	2.39462	7.82932	0.00289884	0.0204221	UP	265.178	265.178	265.178	14.5237	14.52	14.529	10713.1	64053.4	31897	336817	51223			34		M265T15	y
46	0	Heptadecanoyl Ethanolamide	3717	-	Organic nitrogen compounds	2.03109	1.02225	7.10576	0.0029381	0.0205158	UP	314.305	314.305	314.305	14.3687	14.347	14.3893	26921.9	341060	69497.2	692723	50178.2			38		M314T14	y
47	0	2,2-Dichloroethane-1-peroxol	915537	-	Organohalogen compounds	64.2527	6.00569	17.9564	0.00306397	0.0208055	UP	130.966	130.966	130.966	19.27	19.14	19.2745	4792.57	15811.8	2793.31	1.01595e+06	96431.6			21		M131T19	y
48	1	Urea, 1,1'-ethylenebis(3-(2-chloroethyl)-1-nitroso-	294361	-	Unknown	3.16933	1.66418	8.65519	0.00326495	0.0212363	UP	329.053	329.053	329.053	10.784	10.7832	10.859	97263.2	812785	161843	2.57599e+06	313541			29		M329T11	y
50	0	1,4-dimethyl-3-(phenylsulfanyl)-7-(propan-2-yl)azulene	546311	-	Unknown	3.59167	1.84465	11.5283	0.00342339	0.0215512	UP	307.151	307.151	307.152	11.1518	11.025	11.285	11361.3	180181	66500.3	647151	22361.5			1		M307T11	y
51	-	Unknown	-	-	-	22.4683	4.48982	11.6612	0.0034831	0.0216647	UP	333.334	333.334	333.334	21.2306	21.1722	21.289	2337.13	13098.1	13089.1	297523	40167.1			52		M333T21	n
52	0	(R)-(+)-1,1,1-Trifluoro-2-octanol	462270	-	Fatty Acyls	4.61091	-2.20505	-6.17334	0.00379502	0.0222159	DOWN	185.115	185.115	185.115	5.42583	5.30733	5.518	694133	3.16976e+07	5.3017e+06	6.87446e+06	4.51637e+06	[8][M]+		9		M185T5	y
53	9	2,6,13,17-Tetraazatricosan-23-ol	364456	-	Unknown	168.293	7.39483	15.8041	0.00390139	0.0223893	UP	345.356	345.355	345.356	21.0986	21.025	21.1722	1341.82	1090.47	1097.84	207726	22619.6			52		M345T21	y
54	-	Unknown	-	-	-	3838.46	11.9063	15.7655	0.00399921	0.0225429	UP	251.181	251.181	251.181	18.7477	18.745	18.7505	6467.67	0	0	1.6564e+06	181978	[16][M+1]+		30		M251T19	n
55	0	N-Stearylbenzylamine	361051	-	Benzene and substituted derivatives	1.51462	0.598954	6.25412	0.0041475	0.0227656	UP	360.363	360.362	360.363	18.578	18.244	18.7505	105045	3.55871e+06	308123	5.39009e+06	402869	[36][M]+		30		M360T19	y
56	1	1-Hydroxy-3-methyl-3,4-dihydro-2(1H)-quinoxalinone 4-oxide compound with N,N-diethylamine (1:1)	321218	-	Organic nitrogen compounds	151.115	7.2395	14.7439	0.00424008	0.0228988	UP	266.15	266.149	266.15	13.6973	13.471	13.717	15469.5	9249.02	16019.8	1.44113e+06	167448			10		M266T14	y
57	0	(2S)-2-Azido-4-(methylsulfanyl)butanoic acid--cyclohexanamine (1/1)	860635	-	Organic nitrogen compounds	1.94719	-0.961393	-7.37184	0.00430388	0.0229881	DOWN	275.154	275.153	275.154	19.4081	19.289	19.4493	54355.1	1.56658e+06	155818	804533	88194.5			21		M275T19_1	y
58	0	1,1-Propanediol, 2,2,3,3,3-pentafluoro-	337155	-	Organic oxygen compounds	9.5456	3.25484	8.28533	0.00444708	0.0231816	UP	167.013	167.012	167.013	5.78867	5.669	5.7915	3296.47	27037.6	43934.8	259464	20750.8			28		M167T6	y
59	-	Unknown	-	-	-	6.1651	2.62412	6.10624	0.00448503	0.0232313	UP	609.598	609.597	609.598	31.3034	31.207	31.3998	1360.16	26342.5	23647.6	163291	30818.5			35		M610T31	n
60	0	Ethyl [4-fluoro-3-(4,4,5,5-tetramethyl-1,3,2-dioxaborolan-2-yl)phenyl]acetate	854993	-	Unknown	21.5749	4.43128	8.56075	0.0045116	0.0232658	UP	309.167	309.167	309.167	11.603	11.603	11.603	11313.6	16157.9	27986.3	354813	62542.1			2		M309T12_2	y
61	2	2-Amino-8-bromoadenosine	714549	-	Nucleosides	5.08274	2.34561	10.1727	0.00453337	0.0232938	UP	361.025	361.024	361.03	6.45833	6.4015	6.5475	9859.86	108838	71603	553193	24437			24		M361T6	y
62	0	3-Decyn-2-one, 1,1,1-trifluoro-	514815	-	Unknown	3.54827	1.82711	5.84344	0.00453714	0.0232986	UP	207.099	207.099	207.099	5.13633	5.11567	5.157	12547.4	212166	105165	752820	120921			44		M207T5	y
63	1	Punctaporin B	44528	-	Unknown	6.11242	2.61174	8.33017	0.00454492	0.0233085	UP	253.18	253.179	253.18	13.6973	13.669	13.717	17381.9	69095.4	30885.8	422340	66638.9			10		M253T14	y
64	-	Unknown	-	-	-	2.35354	-1.23483	-5.81893	0.00458272	0.0233565	DOWN	227.164	227.164	227.164	10.1837	10.1823	10.215	36514.4	617408	69607.2	262331	79533	[11][M+1]+		13		M227T10	n
65	1	1-(5-bromoselenophen-2-yl)ethanone	481485	-	Unknown	464.046	8.85812	14.5229	0.00470779	0.023511	UP	252.876	252.876	252.877	23.1211	23.058	23.1842	1913.21	0	0	200248	23882.3			4		M253T23	y
66	0	beta-D-Ribofuranuronamide, 1-(6-amino-9H-purin-9-yl)-1-deoxy-N-(2-ethoxy-2-oxoethyl)-, monohydrate	310090	-	Azoles	3.58636	1.84252	8.35189	0.00472587	0.0235328	UP	367.136	367.136	367.136	10.1837	10.1823	10.215	23653.2	207838	45943.7	745383	101571			13		M367T10	y
67	1	Methyl jasmonate	298428	-	Fatty Acyls	3.95553	1.98387	12.3392	0.00475288	0.0235652	UP	225.148	225.148	225.148	10.784	10.7832	10.859	21157.1	182919	15340.1	723539	74320.1			29		M225T11	y
68	2	Benzensulfonate	307388	-	Benzene and substituted derivatives	493.309	8.94635	14.3003	0.00484011	0.0236678	UP	158.003	158.003	158.003	0.525167	0.525	0.529	20489.2	8298.67	9628.59	4.16476e+06	503337			32		M158T1	y
69	1	3E,5E-tridecadienoic acid	34909	-	Fatty Acyls	2.5967	1.37668	13.7173	0.00486663	0.0236985	UP	211.169	211.169	211.169	12.942	12.8927	12.945	10714.1	140441	28171.5	364684	2842.29			39		M211T13	y
70	0	Bis(benzyloxy)(methyl)phenylsilane	672413	-	Benzene and substituted derivatives	8.39874	3.07017	5.93811	0.00494843	0.0237914	UP	335.146	335.146	335.146	9.36783	9.34983	9.388	4730.07	29286	50724.9	248382	38872.2			16		M335T9	y
71	-	Unknown	-	-	-	172.563	7.43098	13.8928	0.00511988	0.02411	UP	317.324	317.324	317.325	19.205	19.14	19.27	3296.72	5121.93	2502.66	883856	109525	[27][M+1]+		21		M317T19	n
72	5	PA(17:0/14:1(9Z)) (Phosphatidic acid)	3885	-	Glycerophospholipids	2.34829	-1.23161	-8.43536	0.00518195	0.0242221	DOWN	633.455	633.455	633.455	23.3457	23.309	23.3825	4328.3	228513	24808	97310.3	10504.1			4		M633T23	y
73	-	Unknown	-	-	-	44.6385	5.48022	11.8062	0.00540006	0.0246998	UP	110.009	110.008	110.009	23.9472	23.702	23.9535	3349.21	8780.87	10750	391965	55178.5			51		M110T24	n
74	-	Unknown	-	-	-	854.039	9.73816	12.8723	0.00598103	0.0258777	UP	275.277	275.277	275.277	29.2103	29.1437	29.277	3130.41	0	0	368541	49589.5			22		M275T29	n
75	-	Unknown	-	-	-	2.79051	1.48053	6.07438	0.00601298	0.0259387	UP	138.063	138.063	138.063	4.32508	4.292	4.463	16925.7	876172	243543	2.44497e+06	375218	[1][M+2]+		25		M138T4	n
76	-	Unknown	-	-	-	190.957	7.5771	12.5837	0.00611252	0.0261268	UP	319.303	319.303	319.303	25.7036	25.6897	25.7175	2917.59	1468.12	2542.85	335282	45876.5	[29][M+1]+		40		M319T26	n
77	0	1,3-bis(2-ethylhexoxy)propan-2-amine	529244	-	Unknown	1565.66	10.6126	12.7262	0.00611539	0.0261321	UP	316.321	316.321	316.321	19.2722	19.27	19.2745	15060.2	2666.58	4618.66	4.62537e+06	629138	[27][M]+		21		M316T19	y
78	-	Unknown	-	-	-	5.2112	2.38161	5.89292	0.00615797	0.0262115	UP	505.442	505.441	505.442	28.835	28.7987	28.8713	54680	249896	173464	1.30226e+06	256093			14		M505T29	n
79	0	Methyl 2-fluoro-4-(4,4,5,5-tetramethyl-1,3,2-dioxaborolan-2-yl)benzoate	772037	-	Unknown	94.5931	6.56366	11.9696	0.0062965	0.0264654	UP	281.136	281.136	281.136	10.1837	10.1823	10.215	11172.4	9553.88	14675.2	917337	130537			13		M281T10	y
80	4	Diethyl (2-methoxyethyl)propylpropanedioate	450712	-	Unknown	486.769	8.92709	12.1137	0.0067458	0.0272468	UP	261.169	261.169	261.169	18.7477	18.745	18.7505	1151.68	0	0	210054	30034.1			30		M261T19	y
81	1	Oxypinnatanine	86246	-	Organic acids and derivatives	66.1113	6.04682	10.9957	0.00682017	0.0273703	UP	261.108	261.108	261.108	11.934	11.9212	11.9382	11224.1	4705.11	8149.49	330080	50601.2			11		M261T12	y
82	2	N-Isobutyl decanamide	308397	-	Fatty Acyls	2.27668	1.18693	5.46251	0.00706119	0.0277598	UP	228.233	228.232	228.233	19.27	19.14	19.3113	10725.5	256292	83874.7	583496	61065.7			21		M228T19	y
83	-	Unknown	-	-	-	21.5935	4.43253	7.76763	0.00719958	0.0279764	UP	291.272	291.272	291.272	9.62717	9.60133	9.653	19332.8	18739.3	31748.2	407754	80725	[25][M+1]+		19		M291T10	n
84	0	Ammonium pentadecanoate	520164	-	Fatty Acyls	482.457	8.91426	11.4283	0.00756276	0.0285217	UP	260.258	260.258	260.259	19.27	19.14	19.2745	3926.6	1649.1	1486.58	865020	130842			21		M260T19_2	y
85	0	Propan-1-ol--triphenylsilanol (1/1)	971467	-	Unknown	3.1416	1.6515	5.35513	0.00763977	0.0286332	UP	337.162	337.162	337.162	13.5828	13.5633	13.669	7582.46	142147	57607	446569	79850.4			10		M337T14_1	y
86	3	Oxaziridine-2-sulfonic acid	896580	-	Organic acids and derivatives	390.698	8.60991	11.2772	0.00774946	0.0287896	UP	125.986	125.986	125.986	13.6832	13.669	13.6973	16649.6	4818.53	5779.25	1.88259e+06	288348			10		M126T14	y
87	9	Dilauryl tartrate	358999	-	Organic acids and derivatives	5.28413	-2.40167	-8.16538	0.00791363	0.0290188	DOWN	487.395	487.394	487.395	29.7028	29.6908	29.7148	8377.52	205937	11202	38828.9	33630.6			26		M487T30	y
88	-	Unknown	-	-	-	2.20542	1.14105	4.91866	0.00793887	0.0290534	UP	129.986	129.986	129.986	28.835	28.7987	28.8713	3993.26	242186	73037.3	534120	72344.4			14		M130T29	y
89	-	Unknown	-	-	-	10.6378	3.41112	10.1481	0.00821826	0.0294285	UP	337.852	337.851	337.852	23.6456	23.5892	23.702	903.839	7024.52	1728.5	74725.2	11425			49		M338T24	n
90	3	Oxaziridine-2-sulfonic acid	896580	-	Organic acids and derivatives	401.475	8.64917	10.7487	0.00851211	0.029806	UP	125.986	125.986	125.986	23.9472	23.702	23.9535	10104.1	2949.32	4681.98	1.24183e+06	199579			51		M126T24	y
91	-	Unknown	-	-	-	382.304	8.57858	10.6989	0.00859643	0.0299112	UP	122.964	122.964	122.964	21.636	21.4623	21.8365	3310.6	895.287	1550.68	452255	73054.1			43		M123T22	n
92	1	2-(Trifluoroacetyl)cyclooctan-1-one	347206	-	Organic acids and derivatives	3.78817	1.9215	9.05545	0.00870867	0.0300493	UP	223.094	223.094	223.094	5.78867	5.669	5.7915	21218.6	299944	155962	1.13624e+06	35536.1			28		M223T6	y
93	1	(2-anilino-2-oxoethyl) N,N-dimethylcarbamodithioate	561208	-	Unknown	3.66559	1.87404	9.9352	0.00882761	0.0301931	UP	255.062	255.062	255.062	4.9335	4.93267	4.93433	8530.61	214985	98987.1	788046	13506.7			44		M255T5	y
94	0	4-Octyloxyphenylboronic acid	487291	-	Unknown	558.586	9.12564	10.5283	0.00890128	0.0302809	UP	251.181	251.181	251.181	31.7267	31.638	31.8155	2288.88	0	0	241045	39655.1			15		M251T32	y
95	0	Succinic acid, tert-butyl ester, sodium salt	392490	-	Organic acids and derivatives	11.9018	3.57311	7.77413	0.00892922	0.0303139	UP	197.078	197.078	197.079	6.61275	6.5475	6.678	5568.44	21045.8	16096.1	250484	48517.8			24		M197T7	y
96	0	(2S,3R)-2-aminoheptadecane-1,3-diol	479551	-	Sphingolipids	17546.7	14.0989	10.4759	0.0089894	0.0303847	UP	288.29	288.29	288.29	23.1732	23.1623	23.1842	71062.1	0	0	7.57186e+06	1.25191e+06			4		M288T23	y
97	-	Unknown	-	-	-	3.13956	1.65056	4.7647	0.00922586	0.0306568	UP	122.964	122.964	122.964	0.525	0.446	0.527	43117.4	2.412e+06	1.24012e+06	7.57262e+06	1.40762e+06			32		M123T1	n
98	0	[9-(4-Fluorophenyl)-9H-fluoren-9-yl]acetaldehyde	947686	-	Organic oxygen compounds	5.75028	2.52363	8.34086	0.00923531	0.0306675	UP	303.118	303.118	303.118	10.1993	10.1837	10.215	1410.44	19801.7	19021.9	114692	5142.74			13		M303T10	y
99	-	Unknown	-	-	-	11.19	3.48413	7.22836	0.00934213	0.0307872	UP	111.984	111.984	111.984	21.7362	21.636	21.8365	938.959	7307.87	6329.02	83384.4	17095.4			43		M112T22	n
100	0	Echiguanine B	423556	-	Azoles	396.796	8.63225	10.2507	0.00937088	0.0308191	UP	251.125	251.125	251.125	11.603	11.603	11.603	81542.4	5822.24	5527.82	2.36732e+06	398980			2		M251T12	y
101	7	3,4-Dihydro-3-thioxo-1,2,4-triazin-5(2H)-one	334712	-	Unknown	1305.94	10.3509	10.1748	0.00952158	0.0309844	UP	130.008	130.008	130.008	5.73025	5.669	5.7915	7592.37	0	0	563550	95932.6			28		M130T6	y
102	0	Orotidine	5754	-	Nucleosides	4.68332	2.22753	8.2137	0.00957489	0.031042	UP	289.068	289.068	289.068	5.663	5.657	5.669	117771	852883	172530	3.99432e+06	639584			28		M289T6	y
103	-	Unknown	-	-	-	7.82611	-2.96829	-8.09333	0.009687	0.0311617	DOWN	551.632	551.632	551.632	23.3979	23.309	23.4868	1656.55	135728	24416.4	17343	6761.97	[55][M+1]+		4		M552T23	n
104	2	Phosphorothioic O,O,O-acid--2,3-dichloropropan-1-ol (1/3)	977264	-	Organic acids and derivatives	1074.77	10.0698	9.81941	0.0102126	0.0316994	UP	498.901	498.901	498.901	31.7967	31.7778	31.8155	5349.57	0	0	463791	81808.3			15		M499T32	y
105	1	Mevinphos	295644	-	Fatty Acyls	23.0237	4.52505	9.17158	0.0102879	0.0317734	UP	229.084	229.084	229.084	8.08558	8.049	8.12217	11827.4	26129.2	15302.7	601592	107593			6		M229T8	y
106	1	Ammonium pentadecanoate	520164	-	Fatty Acyls	192.414	7.58807	9.70936	0.010427	0.0319081	UP	260.258	260.258	260.258	11.9297	11.9212	11.9382	3476.76	2075.87	1040.98	399426	70875.6			11		M260T12	y
107	1	4-tert-butyl-2-trifluoromethylcyclohexanone	611231	-	Unknown	4.0798	2.0285	7.03071	0.0104653	0.0319446	UP	223.131	223.131	223.131	9.71825	9.653	9.7835	24242.6	183977	131491	750588	46848.4			19		M223T10	y
108	0	N,N-Dimethyldodecylamine-N-oxide	265686	-	Organic nitrogen compounds	3.36592	1.751	8.23258	0.0105451	0.0320205	UP	230.248	230.248	230.248	11.603	11.603	11.603	302322	1.7708e+06	200319	5.96037e+06	858379			2		M230T12	y
109	2	Benzensulfonate	307388	-	Benzene and substituted derivatives	29.2877	4.87222	8.74999	0.0105499	0.0320249	UP	158.003	158.003	158.003	21.7362	21.636	21.8365	1384.65	3017.82	3123.95	92597.7	17454.9			43		M158T22	y
110	2	1-Hydroxy-3-methyl-3,4-dihydro-2(1H)-quinoxalinone 4-oxide compound with N,N-diethylamine (1:1)	321218	-	Organic nitrogen compounds	405.84	8.66477	9.64444	0.0105806	0.0320539	UP	266.15	266.15	266.151	31.7267	31.638	31.8155	1460.08	0	0	175131	31451.8			15		M266T32	y
111	10	2,6,13,17-Tetraazatricosan-23-ol	364456	-	Unknown	6.95631	2.79832	4.888	0.0106251	0.0320956	UP	345.356	345.356	345.356	31.3998	31.289	31.4647	5068.8	89787.2	155516	626589	109527			35		M345T31	y
112	0	5-[4-(trifluoromethyl)phenyl]cyclohexane-1,3-dione	377514	-	Unknown	1.74482	0.803078	4.53737	0.0107928	0.0322507	UP	257.078	257.078	257.079	6.9945	6.942	6.99733	19828.4	327001	62171.4	570558	69128			23		M257T7	y
113	0	Hafnium tetrahydride	770905	-	Inorganic compounds	29.2683	4.87127	7.66365	0.0108442	0.0322975	UP	184.985	184.985	184.985	29.7892	29.6908	29.8875	19685.3	62021.9	107425	1.8237e+06	383388			26		M185T30_2	y
114	4	1-{3-[(Diethoxymethyl)silyl]propyl}pyrrolidine-2,5-dione	895063	-	Unknown	2.14492	-1.10093	-7.79479	0.0110901	0.0325694	DOWN	274.146	274.144	274.146	24.1518	24.051	24.1938	8424.31	1.07045e+06	31831.5	499060	122910			54		M274T24	y
115	6	3,4-Dihydro-3-thioxo-1,2,4-triazin-5(2H)-one	334712	-	Unknown	1533.49	10.5826	9.2523	0.0114808	0.0329861	UP	130.008	130.008	130.008	11.7358	11.735	11.7367	8054.14	0	0	661741	123879			2		M130T12	y
116	-	Unknown	-	-	-	204.68	7.67723	9.19453	0.011623	0.0331334	UP	507.86	507.86	507.86	31.7267	31.638	31.8155	936.777	0	0	88325.1	16638.5			15		M508T32	n
117	0	Orotidine	5754	-	Nucleosides	4.33235	2.11515	7.01099	0.0116551	0.0331664	UP	289.068	289.068	289.069	5.4285	5.30733	5.469	117771	944283	239740	4.09096e+06	739490			9		M289T5	y
118	-	Unknown	-	-	-	27.2701	-4.76925	-7.79536	0.0117163	0.0332287	DOWN	140.545	140.545	140.545	6.90958	6.84817	6.971	13430.7	321210	66910.6	11635	15945.6			23		M141T7	n
119	2	N,N-Dimethyldodecylamine-N-oxide	265686	-	Organic nitrogen compounds	19.6701	4.29794	7.76396	0.0117677	0.0332809	UP	230.247	230.247	230.248	19.3487	19.2745	19.4228	2145.04	10817.6	10662.6	215612	44425.7			21		M230T19	y
120	0	(E)-1-(4-Nitrophenyl)-2-{[2-(4-nitrophenyl)hydrazinylidene]methyl}diazene	362913	-	Unknown	2.22379	1.15302	4.97949	0.0122612	0.0340397	UP	315.083	315.083	315.084	6.43	6.4015	6.5475	20493.5	318740	70760.6	708809	115768			24		M315T6	y
121	-	Unknown	-	-	-	9.31274	3.21921	4.73296	0.0124285	0.0342907	UP	619.577	619.577	619.578	31.7267	31.638	31.8155	1767.76	19176	33213.8	181260	49144.4			15		M620T32	n
122	0	Dibutylamine, compd. with hexafluorophosphate	283399	-	Organic nitrogen compounds	157.089	7.29544	8.84365	0.0124326	0.0342969	UP	275.123	275.123	275.123	13.5633	13.471	13.5828	7332.53	2109.66	2638.1	354002	68868.5			10		M275T14	y
123	-	Unknown	-	-	-	5.86744	2.55273	8.26034	0.0130852	0.0352683	UP	700.645	700.645	700.646	30.612	30.5185	30.6325	3136.27	68728.3	8685.53	403259	69605.5			36		M701T31	n
124	0	Benzo[b]thiophene, 2-[2-(4-methylphenyl)ethenyl]-	419250	-	Benzene and substituted derivatives	4.6516	2.21773	6.63441	0.01348	0.0358347	UP	251.089	251.089	251.089	4.9335	4.93267	4.93433	6062.13	200450	57953.5	932412	182094			44		M251T5	y
125	1	1-Heptadecanamine, N,N-dimethyl-, acetate	371831	-	Unknown	7.76966	2.95785	4.30132	0.0136871	0.0361256	UP	344.353	344.352	344.353	31.7267	31.638	31.8155	20249.5	299668	519041	2.33056e+06	631972			15		M344T32	y
126	10	Decanoic acid, 1,2-ethanediylbis(oxy-2,1-ethanediyl) ester	355016	-	Fatty Acyls	1.73352	-0.793704	-4.24601	0.0137063	0.0361523	DOWN	459.364	459.363	459.365	31.3605	31.289	31.3887	3305.73	450725	58569	260006	51209.1			35		M459T31	y
127	5	Rozenite (Fe(SO4).4H2O)	349579	-	Unknown	12.2717	3.61726	5.45195	0.0138001	0.0362827	UP	224.935	224.935	224.935	15.5167	15.488	15.5453	3084.8	54530.1	83519.7	669177	176507			27		M225T16	y
128	0	Nonadecan-10-amine	472372	-	Unknown	26.051	4.70327	6.84633	0.013985	0.036537	UP	284.331	284.331	284.331	31.7267	31.638	31.8155	4448.75	19217.5	33285.6	508129	119127			15		M284T32	y
129	0	Silane, [(1,3-diphenyl-2-propynyl)oxy]trimethyl-	612861	-	Unknown	40.0188	5.3226	7.43627	0.0144285	0.037134	UP	281.136	281.136	281.136	12.2397	12.198	12.2897	14109.5	21899.2	37930.5	887892	198108			31		M281T12	y
130	4	Dichloro(difluoro)(pentafluoroethyl)-lambda~5~-phosphane	942059	-	Unknown	2.26636	1.18038	4.09718	0.014911	0.0377637	UP	258.909	258.908	258.909	21.7362	21.636	21.8365	698.537	28904	10787.5	65507	11093.3			43		M259T22	y
131	1	5,9-dinitrotridecane-2,12-dione	290266	-	Unknown	6.65743	2.73497	7.94366	0.0149454	0.0378078	UP	303.155	303.155	303.155	13.6832	13.669	13.6973	10155.6	47620.6	4575.84	317031	58564.2			10		M303T14	y
132	4	2-Chloro-1-methylpyridinium iodide	272571	-	Nucleosides	142.327	7.15306	8.03659	0.0150903	0.0379926	UP	255.939	255.939	255.939	23.7507	23.702	23.7993	657.475	370.064	343.482	73142.7	15680.2			49		M256T24	y
133	-	Unknown	-	-	-	2.55376	1.35262	5.94184	0.015314	0.0382744	UP	592.557	592.557	592.558	30.6223	30.612	30.6325	1978.52	70223.1	29889.5	179333	10872.6			36		M593T31	n
134	0	4-(Diphenylmethylidene)-3-(trimethylsilyl)oxetan-2-one	677984	-	Unknown	62.1721	5.95819	7.82595	0.0155558	0.0385745	UP	309.131	309.131	309.131	10.183	10.1823	10.1837	13863.9	14129.8	12582.1	887423	192868			13		M309T10	y
135	1	9H-Pyrido(3,4-b)indole, 1-((2-methylphenyl)methyl)-	270689	-	Unknown	2.16207	-1.11242	-6.73904	0.015631	0.0386669	DOWN	273.139	273.139	273.139	30.6894	30.6345	30.7443	23426.9	4.35484e+06	583728	2.0142e+06	145493			36		M273T31	y
136	0	Benzoic acid, 4-amino-2-(benzyloxy)-, 3-piperidinopropyl ester, hydrogen phosphate	387748	-	Benzene and substituted derivatives	209.079	7.70791	7.81312	0.0159525	0.0390566	UP	467.194	467.194	467.194	14.5263	14.5237	14.529	80040.7	7276.27	6768.19	1.52132e+06	335572			34		M467T15	y
137	0	C16 Sphinganine	41556	C13915	Sphingolipids	1146.57	10.1631	7.79614	0.0160548	0.039179	UP	274.274	274.274	274.274	25.7036	25.6897	25.7175	16164.7	1321.12	2288.25	1.8446e+06	409512			40		M274T26	y
138	1	4-nitro-5-piperazinothiophene-2-sulfonamide	470139	-	Unknown	4.7448	2.24635	6.57749	0.0162172	0.0393717	UP	293.037	293.037	293.037	6.43	6.4015	6.5475	16403.6	170923	41775	810998	163292			24		M293T6_1	y
139	-	Unknown	-	-	-	2.80795	1.48952	7.12463	0.0166351	0.0398585	UP	256.153	256.153	256.153	6.96967	6.942	6.99733	27173.5	185227	13066.4	520109	80356.8	[17][M+1]+		23		M256T7	n
140	0	Iodomethylcyclooctane	452477	-	Unknown	9.92434	3.31097	6.72039	0.0169594	0.0402274	UP	253.045	253.045	253.045	4.32633	4.32383	4.463	17735.4	242300	117555	2.40467e+06	544769			25		M253T4_1	y
141	1	tert-Butyl 4-pentylpiperidine-1-carboxylate	290614	-	Unknown	2.41844	1.27408	4.71562	0.0176216	0.0409585	UP	256.227	256.227	256.227	14.3893	14.347	14.52	8742.68	185298	85390.4	448134	45037.5			38		M256T14	y
142	2	2-(4-Chlorophenyl)-6-isothiocyanato-1,3-benzothiazole	914047	-	Unknown	3.61799	-1.85519	-6.7122	0.0178531	0.0412072	DOWN	302.981	302.98	302.981	30.6894	30.6345	30.7443	13547	1.48857e+06	272990	411435	52267.5			36		M303T31_1	y
143	-	Unknown	-	-	-	1.56908	-0.649922	-3.98437	0.0178907	0.0412471	DOWN	668.619	668.619	668.62	31.3605	31.207	31.3998	25470.7	1.93026e+06	190307	1.23018e+06	237489			35		M669T31	n
144	0	9-(2-Chloro-6-fluorobenzyl)-6-methylaminopurine	372736	-	Nucleosides	20.8969	-4.38521	-7.19951	0.0179669	0.0413281	DOWN	292.076	292.076	292.076	6.48875	6.43	6.5475	174454	5.5718e+06	1.27127e+06	266633	113281			24		M292T6	y
145	3	Methanol, (4,6-bis(bis(butoxymethyl)amino)-s-triazin-2-ylimino)di-	387543	-	Unknown	2.56131	-1.35688	-5.16154	0.0182742	0.0416507	DOWN	531.385	531.383	531.387	31.3746	31.3605	31.3887	8832.46	1.26249e+06	237798	492907	100717			35		M531T31_1	y
146	1	(4-Chlorophenylethynyl)trimethylsilane	480529	-	Unknown	2.53199	1.34027	7.01948	0.0183069	0.0416846	UP	209.055	209.055	209.055	9.62717	9.60133	9.653	21762.7	247576	10949.7	626859	92945.1			19		M209T10	y
147	0	2,2,4,4-Tetramethyl-1,5-diphenyl-6-oxa-3-thiabicyclo[3.1.0]hexane (non-preferred name)	723257	-	Unknown	59.5606	5.89629	7.21117	0.018632	0.0420189	UP	311.146	311.146	311.147	14.3687	14.347	14.3893	6412.96	5891.78	2034	350918	82846.9			38		M311T14	y
148	0	Heptadecanoyl Ethanolamide	3717	-	Organic nitrogen compounds	77.7645	6.28104	7.15709	0.0186934	0.0420813	UP	314.305	314.305	314.305	20.2354	20.231	20.2398	2945.84	3942	3952.89	317734	75836.2			3		M314T20	y
149	1	Heptadecanoyl Ethanolamide	3717	-	Organic nitrogen compounds	16.9679	4.08473	5.44684	0.0189726	0.0423623	UP	314.305	314.305	314.305	31.7267	31.638	31.8155	9363.93	64983.2	112554	1.10751e+06	311822			15		M314T32	y
150	1	2,2-Diphenyl-1-(trimethylsilyl)cyclopropane-1-carboxylic acid	684502	-	Unknown	4.9517	2.30792	6.14389	0.0190193	0.0424089	UP	311.146	311.146	311.146	9.69958	9.61567	9.7835	3535.32	39850.5	10798.1	197327	43061.8			19		M311T10	y
151	4	3,3-Difluoro-17-methyl-5alpha-androstan-17beta-ol	70630	C15140	Steroids and steroid derivatives	2.40905	1.26847	4.44019	0.0195349	0.0429145	UP	327.251	327.251	327.251	18.6615	18.578	18.745	9294.86	256068	68185.7	616882	123129			30		M327T19	y
152	0	1-Decene, 4-(methylseleno)-	595827	-	Unknown	2.55056	1.35082	6.54271	0.0196897	0.0430634	UP	235.096	235.096	235.096	6.9945	6.942	6.99733	17642.5	296504	19893.1	756252	120072			23		M235T7	y
153	-	Unknown	-	-	-	20.3439	4.34653	6.945	0.0198322	0.0431993	UP	280.162	280.162	280.162	19.27	19.14	19.2745	7410.24	35866.1	8874.49	729657	172800	[23][M+1]+		21		M280T19	n
154	0	2,2-Dichloroethane-1-peroxol	915537	-	Organohalogen compounds	117.004	6.87041	6.84498	0.0206141	0.043926	UP	130.966	130.966	130.966	23.6456	23.5892	23.702	4289.91	3508.54	2606.97	410512	102955			49		M131T24	y
155	2	2-lauroleic acid	34726	-	Fatty Acyls	12.7673	3.67439	5.76242	0.0206968	0.044001	UP	199.169	199.169	199.169	11.9361	11.934	11.9382	5461.97	10993	10446.5	142188	38025.3			11		M199T12	y
156	2	Coumarinic acid methyl ether	43849	-	Cinnamic acids and derivatives	5.78667	2.53273	5.97406	0.0209834	0.0442583	UP	179.07	179.07	179.07	6.65425	6.6305	6.678	6377.45	60004.8	18891.4	347228	81103.2			47		M179T7	y
157	0	3-Piperidinecarboxamdie, N-butyl-5-phenyl-	265569	-	Unknown	2.22132	1.15142	6.48097	0.0212306	0.044477	UP	255.149	255.149	255.149	6.9945	6.942	6.99733	151185	1.34237e+06	55004.4	2.98185e+06	434685	[17][M]+		23		M255T7	y
158	0	Pelargonic acid morpholide	275410	-	Fatty Acyls	13.8546	3.7923	6.14553	0.0214216	0.044644	UP	228.196	228.196	228.196	25.7036	25.6897	25.7175	6838.28	43391.2	29558.3	601169	154400			40		M228T26	y
159	4	O-Desmethylgalantamine	324589	-	Alkaloids	2.34958	-1.2324	-5.9734	0.0216534	0.0448443	DOWN	274.145	274.144	274.145	30.6345	30.6325	30.7443	11885.5	1.60379e+06	261018	682584	56734			36		M274T31	y
160	3	1,1,1,2-tetrachloro-2-fluoroethane	305139	-	Organohalogen compounds	9.41093	3.23434	4.42296	0.0217613	0.0449367	UP	184.888	184.888	184.889	19.27	19.14	19.2745	1682.73	31975.7	47976.8	300921	93758			21		M185T19	y
161	2	Aleprylic acid	34856	-	Fatty Acyls	2.18994	1.13089	3.82991	0.0218703	0.0450295	UP	197.153	197.153	197.153	11.2184	11.1518	11.285	7452.58	129713	41235.6	284062	56322			1		M197T11	y
162	-	Unknown	-	-	-	120.476	6.91261	6.61909	0.0220131	0.0451502	UP	122.964	122.964	122.964	15.1661	15.14	15.1922	6700.82	11283.2	8067.49	1.35936e+06	352665			27		M123T15	n
163	5	2,2-Difluorohexane	656643	-	Unknown	6.05943	2.59918	4.63555	0.022056	0.0451863	UP	123.097	123.097	123.098	31.638	31.5762	31.8155	2402.38	50743.3	87889.9	309218	40033.4			15		M123T32	y
164	0	1,1,1-trifluoro-6-methylhept-5-ene-2,4-dione	536290	-	Organic oxygen compounds	7.51767	2.91029	6.27524	0.0225599	0.0456042	UP	195.063	195.063	195.063	3.6365	3.63417	3.669	11098.3	254112	58626.2	1.91033e+06	453365			12		M195T4	y
165	7	(Prop-2-yn-1-yl)germane	898069	-	Unknown	1221.86	10.2549	6.49178	0.0229161	0.0458929	UP	116.976	116.976	116.976	5.72425	5.657	5.7915	4063.9	0	0	527267	140678			28		M117T6	y
166	1	Dodecanoic acid, ammonium salt	289881	-	Fatty Acyls	18.4265	4.20371	6.11231	0.0230617	0.0460093	UP	218.211	218.211	218.211	25.7036	25.6897	25.7175	2572.87	17008.2	12638.2	313402	83033.1			40		M218T26	y
167	-	Unknown	-	-	-	4.93631	2.30343	4.03365	0.0230988	0.0460389	UP	141.958	141.958	141.958	5.79008	5.78867	5.7915	21058.5	399378	348285	1.97145e+06	578263			28		M142T6	y
168	2	1-[7-(3-Methylundecyl)-9H-fluoren-2-yl]nonan-1-one	943967	-	Unknown	2.01803	-1.01295	-3.96238	0.0231187	0.0460547	DOWN	475.394	475.392	475.395	31.3887	31.207	31.5762	5043.1	713339	133125	353483	83794.9			35		M475T31	y
169	3	2,2,3,4,4-Pentafluorobut-3-enenitrile	760622	-	Unknown	1984.7	10.9547	6.42243	0.0233963	0.0462737	UP	158.003	158.003	158.003	13.5269	13.471	13.5828	9939.54	0	0	856454	230975			10		M158T14	y
170	-	Unknown	-	-	-	2.5021	-1.32314	-4.49197	0.0239587	0.0467079	DOWN	551.632	551.632	551.632	26.4463	26.364	26.7	2845.15	567615	119631	226856	54336.1			45		M552T26	y
171	0	cis-4-(6-Amino-9H-purin-9-yl)-D-prolinol	421875	-	Unknown	1.82929	0.87128	3.56797	0.0239655	0.0467131	UP	235.13	235.13	235.131	9.34983	9.20183	9.388	52162.6	815878	218127	1.49247e+06	245561			16		M235T9	y
172	1	1-Heptadecanamine, N,N-dimethyl-, acetate	371831	-	Unknown	1.94425	0.959216	5.33629	0.0245013	0.0471152	UP	344.352	344.352	344.353	15.5342	15.488	15.5453	121144	3.16254e+06	256150	6.14877e+06	934813	[32][M]+		27		M344T16	y
173	-	Unknown	-	-	-	3.14864	1.65473	5.69467	0.0248984	0.0474063	UP	535.489	535.489	535.49	29.7379	29.6908	29.785	3284.39	55864.7	6986.33	175898	35833.8			26		M535T30	n
174	-	Unknown	-	-	-	186.076	7.53975	6.1806	0.0251715	0.0476032	UP	122.964	122.964	122.964	23.6456	23.5892	23.702	2576.43	1419.55	978.291	264143	73619.1			49		M123T24_1	n
175	0	3-Methylbenzoic acid	269208	-	Benzene and substituted derivatives	2.98281	1.57667	5.0894	0.025313	0.0477041	UP	137.06	137.06	137.06	4.32508	4.292	4.33	182410	9.472e+06	1.87292e+06	2.82531e+07	6.11112e+06			25		M137T4	y
176	0	Dicyclohexyl[3-(trimethylstannyl)propyl]phosphane	677195	-	Unknown	1227.99	10.2621	6.15896	0.0253637	0.0477401	UP	405.173	405.173	405.173	5.81325	5.7915	5.835	39065.2	0	0	529910	149024			42		M405T6	y
177	-	Unknown	-	-	-	4.87674	-2.28592	-4.26939	0.0254366	0.0477917	DOWN	186.119	186.118	186.119	5.41542	5.30733	5.518	61721.6	3.20809e+06	931236	657835	450807	[8][M+1]+		9		M186T5	n
178	0	D-erythro-Sphingosine (Sphingosine)	41557	-	Sphingolipids	2110.02	11.043	6.04883	0.0262594	0.0483618	UP	286.274	286.274	286.274	23.4316	23.372	23.4912	12844	0	0	910529	260725			4		M286T23	y
179	-	Unknown	-	-	-	121.973	6.93042	5.96921	0.0266737	0.0486403	UP	275.277	275.277	275.277	14.5245	14.52	14.529	13916.4	9373.11	15000.8	1.14327e+06	328674			34		M275T15	n
180	1	N-cyclohexyl-4,4,4-trifluoro-2-oxo-3-(trifluoromethyl)butanamide	295059	-	Benzene and substituted derivatives	10.8817	-3.44383	-5.81426	0.0267597	0.0486975	DOWN	306.092	306.091	306.093	7.04267	6.98083	7.1045	6369.56	176725	47513.1	16240.5	5299.91			23		M306T7	y
181	0	Benzylamine, N,N-dioctyl-	455605	-	Benzene and substituted derivatives	6.53805	2.70886	3.48569	0.0270145	0.0488655	UP	332.331	332.331	332.331	31.3034	31.207	31.3998	28868.7	661605	1.14593e+06	4.32749e+06	1.41599e+06			35		M332T31	y
182	2	2-[1-(4-Fluorophenyl)ethenyl]-4,4,5,5-tetramethyl-1,3,2-dioxaborolane	809166	-	Unknown	2.14708	1.10238	4.54555	0.0271475	0.0489523	UP	249.146	249.146	249.146	11.1518	11.025	11.285	39412.4	536822	85040	1.1526e+06	218685			1		M249T11	y
183	1	1,3,5-Triazine-2,4,6-triamine, N,N-di-2-propenyl-	333785	-	Unknown	2.49368	1.31828	3.63717	0.0272039	0.048989	UP	207.135	207.135	207.136	10.1837	10.1823	10.215	8589.26	215346	126441	537004	86461.6			13		M207T10	y
184	0	Silane, trimethyl(1-naphthalenylmethyl)-	444897	-	Unknown	58.7664	5.87692	5.88401	0.0272652	0.0490287	UP	215.125	215.125	215.125	25.7036	25.6897	25.7175	5464.57	10969	10878.1	653060	188696			40		M215T26	y
185	0	Heptadecanoyl Ethanolamide	3717	-	Organic nitrogen compounds	780.946	9.60908	5.89997	0.0275462	0.0492094	UP	314.305	314.305	314.305	23.2818	23.058	23.303	4164.25	0	0	337000	98932.7			4		M314T23	y
186	3	2-(2-Butoxyethoxy)ethanol	268694	-	Organic oxygen compounds	3.57201	-1.83674	-3.96943	0.0277406	0.0493331	DOWN	163.132	163.132	163.133	5.41542	5.30733	5.518	24862.5	1.48528e+06	411964	415811	219221			9		M163T5	y
187	0	O-Ethyl O-phenyl phenylphosphonothioate	781168	C14434	Benzene and substituted derivatives	1.64896	0.721555	4.68084	0.0277823	0.0493595	UP	279.06	279.06	279.06	6.96967	6.942	6.99733	13791.4	235053	18591.7	387592	53294.4			23		M279T7	y
188	1	Metazine	364768	-	Unknown	10972.2	13.4216	5.87371	0.0277829	0.0493598	UP	250.178	250.178	250.178	25.7036	25.6897	25.7175	52692	0	0	4.73482e+06	1.39621e+06	[14][M]+		40		M250T26	y
189	0	1,4-Dithia-7,10,13-triazacyclopentadecane	648819	-	Unknown	4.16446	-2.05813	-4.98454	0.0285556	0.0498396	DOWN	250.141	250.14	250.141	6.96967	6.942	6.99733	29473.1	598745	152591	143775	41354.8			23		M250T7	y
190	1	N-[6-(2-Azidoacetamido)pyridin-2-yl]dodecanamide	911088	-	Unknown	24.8149	4.63313	5.39878	0.0285756	0.0498518	UP	375.25	375.25	375.25	23.8732	23.7993	23.9472	13514.8	25122.9	33358.2	623421	189027			50		M375T24	y
191	1	N,N-Dimethyldodecylamine-N-oxide	265686	-	Organic nitrogen compounds	19.9153	4.31581	4.98914	0.0286651	0.0499062	UP	230.248	230.248	230.248	31.7967	31.7778	31.8155	3125.99	16338.4	28299	331115	105551			15		M230T32	y
192	0	([1,1'-Biphenyl]-4-yl)(phenyl)methanethione	289316	-	Unknown	2.4337	1.28315	4.23322	0.0287192	0.049939	UP	275.089	275.089	275.089	5.81183	5.78867	5.835	11584.5	236733	127128	576138	55885.6			42		M275T6	y
193	-	Unknown	-	-	-	13.1151	3.71316	4.6518	0.0288205	0.0500002	UP	110.009	110.008	110.009	5.81183	5.78867	5.835	6840.96	28327	40990.4	371512	121029			42		M110T6	n
194	0	3-Chloro-4-(ethylsulfanyl)-5-(2,4,6-trimethylphenyl)furan-2(5H)-one	689971	-	Unknown	2.72765	1.44766	3.7401	0.0288696	0.0500298	UP	297.071	297.071	297.071	6.06917	6.016	6.20383	11418.5	160123	65572.9	436760	110058			33		M297T6	y
195	-	Unknown	-	-	-	5.1181	2.35561	3.48967	0.0290503	0.0501379	UP	280.161	280.161	280.161	12.2397	12.198	12.2897	14640.8	92950	112083	476464	153854	[22][M+1]+		31		M280T12	n
197	-	Unknown	-	-	-	2.13521	-1.09437	-3.63192	0.0303528	0.0510389	DOWN	589.429	589.429	589.429	23.1842	23.1623	23.3825	16943.1	450449	97322	210963	59769.4			4		M589T23	y
198	-	Unknown	-	-	-	3.17555	-1.667	-3.31252	0.0307349	0.0512944	DOWN	678.572	678.572	678.572	31.3887	31.207	31.5762	21163.6	3.04654e+06	707003	959232	831464	[60][M+1]+		35		M679T31	n
199	1	4-Octyloxyphenylboronic acid	487291	-	Unknown	1520.08	10.5699	5.52761	0.0312046	0.0516034	UP	251.181	251.181	251.181	21.4449	21.4275	21.4623	4975.02	0	0	655954	205540			48		M251T21	y
200	-	Unknown	-	-	-	5.71327	2.51432	5.47257	0.0315292	0.0518137	UP	507.868	507.868	507.868	29.1243	29.105	29.1437	130467	455585	30283.1	2.60288e+06	678937			22		M508T29	n
201	0	Phytosphingosine	297165	-	Sphingolipids	6754.02	12.7215	5.47926	0.0317317	0.0519435	UP	318.3	318.3	318.3	15.1661	15.14	15.1922	16251.2	0	0	2.91454e+06	921318			27		M318T15	y
202	-	Unknown	-	-	-	7.72006	2.94861	3.5636	0.0317851	0.0519776	UP	539.529	539.528	539.53	31.7967	31.7778	31.8155	3732.92	38774.7	67159.7	301564	108644			15		M540T32	n
203	0	2,2-Diphenyl-1-(trimethylsilyl)cyclopropane-1-carboxylic acid	684502	-	Unknown	10.3822	3.37604	4.31729	0.0320134	0.0521224	UP	311.146	311.146	311.146	11.934	11.9212	11.9382	7083.72	36235.4	47176.3	376204	127973			11		M311T12	y
204	1	Ethyl bromodifluoroacetate	359430	-	Unknown	69.5822	6.12065	5.41687	0.0322013	0.0522407	UP	202.951	202.951	202.951	19.2722	19.27	19.2745	13032.3	36730.6	32560.6	2.5558e+06	804816			21		M203T19	y
205	-	Unknown	-	-	-	4.181	2.06385	3.48175	0.0327893	0.0526055	UP	507.456	507.452	507.459	29.8157	29.785	29.8463	4052.66	51297.9	43765.2	214477	68367.5			26		M507T30	n
207	8	3-Fluoro-2-(hexadecyloxy)propan-1-ol	917193	-	Unknown	117.738	6.87944	5.30946	0.0335788	0.0530827	UP	319.303	319.303	319.303	23.4891	23.487	23.4912	2793.59	459.029	795.062	87916.9	28519.4			4		M319T23	y
208	2	6-(4-Methylpiperazin-1-yl)-N-[2-(pyrrolidin-1-yl)ethyl]pyridazin-3-amine	968258	-	Benzene and substituted derivatives	2.76682	1.46823	3.66319	0.0337518	0.0531854	UP	291.23	291.229	291.23	18.6258	18.578	18.7942	3363.23	53197.6	39105.8	147188	21112.5			30		M291T19	y
209	2	2,4,6(1H,3H,5H)-Pyrimidinetrione, 1,3-bis(2-methoxyethyl)-	370654	-	Diazines	4.28352	2.0988	3.48062	0.0339796	0.0533197	UP	245.113	245.112	245.113	9.653	9.61567	9.7835	7716.59	81925.2	113928	350928	70283.9			19		M245T10_1	y
210	0	2-(octadecylsulfanyl)naphthalene	552555	-	Prenol lipids	2.4401	-1.28694	-3.814	0.0340962	0.0533879	DOWN	413.324	413.324	413.324	23.7988	23.7832	23.8145	20159.6	472915	114236	193810	54916.8			50		M413T24_2	y
211	0	Silane, trimethyl(1-naphthalenylmethyl)-	444897	-	Unknown	1638.32	10.678	5.27435	0.0341179	0.0534006	UP	215.125	215.125	215.125	19.27	19.14	19.2745	3100.04	0	0	706981	232166			21		M215T19_2	y
212	2	Phosphoroselenoic acid	58177	C05172	Inorganic compounds	3.90336	1.96472	3.31949	0.0342277	0.0534646	UP	162.907	162.907	162.907	30.612	30.5185	30.6325	5896.27	180034	158182	702738	222181			36		M163T31	y
213	3	(2-Chloroethyl)carbamyl azide	696457	-	Unknown	6.19415	2.63091	4.79154	0.0342752	0.0534922	UP	149.023	149.023	149.023	19.27	19.14	19.2745	17672.8	278817	110221	1.72704e+06	511769			21		M149T19	y
214	1	1-Iodo-10-undecene	612470	-	Unknown	4.07648	2.02733	3.44333	0.0344341	0.0535842	UP	281.076	281.076	281.076	7.37767	7.37267	7.405	9766.72	118084	97155.6	481367	154770			17		M281T7	y
215	4	Elocalcitol	449112	-	Steroids and steroid derivatives	3.31687	-1.72982	-3.1523	0.034467	0.0536031	DOWN	443.334	443.333	443.334	31.3746	31.3605	31.3887	15075.2	2.39395e+06	641675	721605	657721			35		M443T31	y
216	2	1,1,1,2-tetrachloro-2-fluoroethane	305139	-	Organohalogen compounds	4.7558	2.24969	4.68335	0.0348302	0.0538112	UP	184.889	184.888	184.889	25.7036	25.6897	25.7175	3202.31	114791	155246	545923	36358			40		M185T26	y
217	1	1-Heptadecanamine, N,N-dimethyl-, acetate	371831	-	Unknown	5.97848	2.57978	4.45725	0.034835	0.0538139	UP	344.352	344.352	344.353	29.403	29.277	29.5717	18018.5	258197	140047	1.54362e+06	479473			22		M344T29	y
218	1	Convicine	66969	C08430	Organic oxygen compounds	16.9869	-4.08635	-5.19248	0.0348711	0.0538344	DOWN	306.093	306.093	306.093	5.4535	5.389	5.518	6607.55	216584	67929.4	12750.1	2935.9			9		M306T5	y
219	0	N-{4-[(E)-{(2Z)-[Amino(nitroamino)methylidene]hydrazinylidene}methyl]phenyl}acetamide	784911	-	Benzene and substituted derivatives	3.40101	1.76596	4.5845	0.0352336	0.0540629	UP	265.104	265.104	265.104	6.1365	6.06917	6.20383	11970.3	168807	37599.6	574116	148440			33		M265T6	y
220	2	Ceramide (Cer(d18:1/20:0))	83707	-	Sphingolipids	2.16169	1.11216	3.82584	0.0356094	0.0542969	UP	594.583	594.582	594.584	29.34	29.277	29.403	1675	64015.4	13943.9	138381	30643.9			22		M595T29	y
221	1	10,13-dimethyl-17-(6-methylheptan-2-yl)-2,3,4,5,6,7,8,9,11,12,14,15,16,17-tetradecahydro-1H-cyclopenta[a]phenanthren-3-amine	314586	-	Steroids and steroid derivatives	1.53651	-0.619656	-3.11574	0.0356855	0.0543439	DOWN	388.394	388.394	388.394	29.4521	29.403	29.5012	5363.85	353382	48112.7	229990	48890.5			7		M388T29	y
222	-	Unknown	-	-	-	1.68017	0.748606	3.29159	0.0366861	0.055169	UP	361.366	361.366	361.366	18.745	18.578	18.7505	26872.3	870881	174065	1.46323e+06	258565	[36][M+1]+		30		M361T19	n
223	0	2-(1,1,1,3,3,3-hexafluoropropan-2-ylidene)-3,4-dihydronaphthalen-1(2h)-one	554403	-	Unknown	4.08374	2.02989	4.61559	0.0369329	0.0553694	UP	295.055	295.055	295.055	6.1365	6.06917	6.20383	23506.6	194814	47661.2	795568	220344			33		M295T6	y
224	-	Unknown	-	-	-	22.9192	4.51848	4.61991	0.0372176	0.0555989	UP	759.222	759.222	759.222	31.4322	31.3998	31.4647	4643.6	11817.3	20468.2	277437	97457.1			35		M759T31	y
225	0	Guanine, 8-(p-nitrophenyl)-	426722	-	Nucleosides	1.93689	0.953743	3.18446	0.0373084	0.0556719	UP	273.073	273.072	273.074	5.05017	4.93267	5.15317	28407.6	1.05292e+06	320455	2.03939e+06	430338			44		M273T5	y
226	-	Unknown	-	-	-	5.52235	-2.46528	-4.87243	0.0384005	0.0565358	DOWN	278.18	278.18	278.18	14.5237	14.52	14.529	49539	1.5979e+06	463317	289351	41403.3	[21][M+1]+		34		M278T15	n
227	-	Unknown	-	-	-	3.09535	-1.6301	-3.04261	0.0385517	0.0566535	DOWN	473.377	473.376	473.377	28.835	28.7987	28.8713	2273.71	91678.3	24142.9	29474.2	25904.3			14		M473T29	y
228	0	Adenosine, 2-amino-3'-deoxy-	607939	-	Nucleosides	2.20419	1.14025	3.02961	0.0389332	0.0569488	UP	267.12	267.12	267.12	6.41575	6.4015	6.43	12543.9	199319	94456.9	439337	99535.1			24		M267T6	y
229	2	2,6-Bis[(dec-4-en-1-yl)oxy]anthracene	912587	-	Unknown	1.63849	-0.712369	-4.60796	0.0397461	0.0575689	DOWN	487.361	487.36	487.362	22.0278	21.9813	22.0742	14236.6	988678	142874	603407	23641.6			43		M487T22	y
230	1	1-Dodecanamine acetate	344822	-	Organic nitrogen compounds	189.828	7.56855	4.85289	0.0398849	0.0576737	UP	246.243	246.242	246.243	25.7036	25.6897	25.7175	2084.05	659.675	1142.59	179836	63939.7			40		M246T26	y
231	1	Dodecanoic acid, ammonium salt	289881	-	Fatty Acyls	3.90692	1.96603	4.48737	0.0407818	0.0583417	UP	218.211	218.211	218.212	6.43	6.4015	6.5475	56937.8	462637	95168.8	1.80749e+06	510291			24		M218T6	y
232	2	(1-Hydroxyethane-1,1-diyl)bis(phosphonate)	984518	-	Unknown	17.0935	4.09537	4.57671	0.0407991	0.0583545	UP	202.951	202.951	202.951	11.6704	11.603	11.7378	1130.28	3760.23	3638.89	66734.2	23553			2		M203T12	y
233	0	2-{4-[(Ethylsulfanyl)methyl]phenyl}-4,4,5,5-tetramethyl-1,3,2-dioxaborolane	282503	-	Unknown	4.75617	2.2498	4.45667	0.0413758	0.0587764	UP	279.159	279.158	279.159	19.27	19.14	19.2745	41376.8	827310	220666	3.93483e+06	1.18738e+06	[23][M]+		21		M279T19	y
234	0	Stannanediamine	908301	-	Unknown	361.897	8.49943	4.75803	0.0414452	0.0588267	UP	152.947	152.947	152.947	5.81325	5.7915	5.835	2642.91	0	0	156168	56849.5			42		M153T6	y
235	1	N,N-Dimethyldodecylamine-N-oxide	265686	-	Organic nitrogen compounds	26.7544	4.7417	4.65879	0.0414949	0.0588628	UP	230.248	230.248	230.248	22.4746	22.465	22.4842	2208.6	7934.37	7590.99	212279	75591.4			41		M230T22	y
236	8	3-Fluoro-2-(hexadecyloxy)propan-1-ol	917193	-	Unknown	535.369	9.06439	4.74596	0.0416433	0.0589701	UP	319.303	319.303	319.303	19.3412	19.289	19.3933	3137.53	0	0	231026	84313.7			21		M319T19	y
237	0	n-adenosylaziridine	616838	-	Nucleosides	15.2363	3.92944	4.41519	0.0416802	0.0589968	UP	293.136	293.136	293.136	9.36783	9.34983	9.388	10040.6	55148	58909.3	842444	303181			16		M293T9	y
238	0	Oxibendazole	312855	-	Benzene and substituted derivatives	55.5579	5.79592	4.65845	0.0420986	0.0592971	UP	250.119	250.119	250.119	29.7499	29.7148	29.785	2392.66	3721.94	6446.6	222767	81187.1			26		M250T30	y
239	2	O,O-Dipropyl amino(imino)methylamidothiophosphate	398422	-	Unknown	3.51152	1.8121	3.87028	0.042605	0.0596568	UP	240.092	240.092	240.092	5.11425	5.11283	5.11567	16376.1	434549	160714	1.52593e+06	461223			44		M240T5	y
240	1	1-Dodecanamine acetate	344822	-	Organic nitrogen compounds	246.994	7.94833	4.67053	0.0428987	0.0598634	UP	246.243	246.243	246.243	23.4891	23.487	23.4912	2174.87	283.814	491.58	141157	52239.9			4		M246T23	y
241	-	Unknown	-	-	-	4.79981	2.26298	4.14251	0.0433214	0.0601583	UP	700.647	700.647	700.647	29.1243	29.105	29.1437	1473.43	17846.3	7015.22	85659.1	27472			22		M701T29	n
242	3	4-Butoxy-1,1,1-trifluoro-4-methoxybutane	896816	-	Unknown	45.5662	5.50989	4.59609	0.043474	0.0602641	UP	215.126	215.125	215.126	9.61567	9.60133	9.653	5211.02	6983.11	8046.27	324748	119480			19		M215T10	y
243	1	Silane, [6-[4-(1,1-dimethylethyl)phenyl]-1,3,5-hexatriynyl]trimethyl-	608819	-	Unknown	4.74723	2.24708	3.21319	0.0435509	0.0603172	UP	279.157	279.157	279.157	12.2397	12.198	12.2897	100423	543804	561044	2.58224e+06	944779	[22][M]+		31		M279T12	y
244	-	Unknown	-	-	-	7.97631	2.99572	4.31537	0.0455065	0.0616648	UP	314.334	314.334	314.334	29.34	29.277	29.403	24393.8	55179.6	24280.5	440130	152587			22		M314T29	n
245	-	Unknown	-	-	-	46.5044	5.53929	4.42947	0.0459312	0.0619498	UP	169.976	169.976	169.976	13.5172	13.471	13.5633	2701.65	5015.32	8686.78	246613	94071.3			10		M170T14	y
246	1	3-Oxooctanoic acid glycerides	94392	-	Organic compounds	4.48357	2.16465	3.05359	0.0463033	0.0621973	UP	250.141	250.141	250.142	4.959	4.93433	5.05733	3744.21	62056.8	103111	278881	67036.1			44		M250T5	y
247	2	(9R,13R)-1a,1b-dihomo-jasmonic acid	36062	-	Fatty Acyls	8.83005	3.14242	3.71282	0.0464597	0.0623007	UP	239.164	239.164	239.164	12.2397	12.198	12.2897	20433.8	56488.7	68531	500068	195255			31		M239T12	y
248	0	m-Dioxane, 5-equatorial-((4,6-bis(1-aziridinyl)-s-triazin-2-yl)amino)-2,2,5-trimethyl-	361308	-	Unknown	1961.6	10.9378	4.44391	0.0470892	0.0627135	UP	307.188	307.188	307.188	15.1661	15.14	15.1922	12155.8	0	0	846485	329924			27		M307T15	y
249	1	(2E)-[2-(Methanesulfonyl)hydrazinylidene]acetic acid	586226	-	Benzene and substituted derivatives	75.2576	6.23377	4.43219	0.047181	0.0627732	UP	167.012	167.012	167.013	11.7378	11.735	11.9382	3448.26	2998.09	2600.76	236455	91195.2			2		M167T12	y
250	0	1-Isothiocyanato-4-phenylbutane	93134	-	Benzene and substituted derivatives	2.96666	1.56884	3.36651	0.0476848	0.0630989	UP	192.084	192.084	192.084	31.3034	31.207	31.3998	3734.94	178300	75860	528956	163686			35		M192T31	y
251	0	Sodium cyclohexyl succinate	445102	-	Fatty Acyls	7.36888	2.88145	4.09516	0.047765	0.0631504	UP	223.094	223.094	223.094	7.405	7.37767	7.59033	47500.7	330144	177767	2.43279e+06	871368			17		M223T7	y
252	-	Unknown	-	-	-	1.52982	-0.613365	-2.88598	0.047834	0.0631946	DOWN	356.285	356.285	356.286	21.9089	21.6685	22.0742	4019.87	287873	36899.6	188174	47103	[34][M+1]+		43		M356T22	n
253	-	Unknown	-	-	-	75.8967	6.24597	4.37065	0.0481075	0.0633694	UP	122.964	122.964	122.964	11.603	11.603	11.603	8827.67	10387.3	16048.7	799278	312218			2		M123T12	n
254	1	3,6,9-Trioxa-12-azatetracosan-1-ol	918853	-	Unknown	3.49681	1.80604	4.23246	0.0488396	0.0638321	UP	362.327	362.327	362.327	11.9276	11.9212	11.934	447610	2.96715e+06	375539	1.03756e+07	3.0084e+06			11		M362T12	y
255	1	2-N-butyl-6-N-methyl-7H-purine-2,6-diamine	341000	-	Nucleosides	2.19201	1.13225	3.48097	0.0492262	0.0640736	UP	221.151	221.151	221.151	11.934	11.9212	11.9382	33313.8	400479	88194	877852	220550			11		M221T12	y
256	6	2-(2-{2-[2-(2,3,4-Tributylphenoxy)ethoxy]ethoxy}ethoxy)ethan-1-ol	783251	-	Unknown	3.14915	-1.65496	-3.19507	0.0499879	0.0645436	DOWN	439.339	439.339	439.339	30.6325	30.534	30.6345	3172.97	238815	78657.2	75834.9	40238			36		M439T31	y

## Sheet: Table S2
Supplementary Table S2. Differentially accumulated metabolites (DAMs) in pairwise carbon source comparison between sucrose versus glucose
featureidx	ppm	Putative metabolites	METLIN ID	KEGG ID	Class	fold	log2fold	tstat	pvalue	qvalue	updown	mzmed	mzmin	mzmax	rtmed	rtmin	rtmax	maxint	dataset1_mean	dataset1_sd	dataset2_mean	dataset2_sd	isotopes	adducts	peakgroup	metlin	name	METLIN_MSMS	usernotes
1	-	Unknown	-	-	-	48.1789	5.59033	75.9492	5.26248e-06	0.00183367	UP	110.009	110.008	110.009	15.5167	15.488	15.5453	5207.34	27897.7	26699.2	1.34408e+06	13715.5			22		M110T16	n
2	3	2-Amino-8-bromoadenosine	714549	-	Nucleosides	5.24729	2.39157	22.5725	2.2838e-05	0.00317946	UP	361.025	361.024	361.025	6.43	6.4015	6.5475	9859.86	105424	24152.5	553193	24437			19		M361T6	y
3	-	Unknown	-	-	-	3.74193	1.90378	20.3837	3.52994e-05	0.00344686	UP	258.274	258.273	258.275	22.4746	22.465	22.4842	9778.31	117745	20007.8	440593	18768.8			36		M258T22	n
4	3	1-Hydroxy-3-methyl-3,4-dihydro-2(1H)-quinoxalinone 4-oxide compound with N,N-diethylamine (1:1)	321218	-	Organic nitrogen compounds	71.3165	6.15616	34.9362	4.03466e-05	0.00351462	UP	266.151	266.151	266.151	28.0937	28.0383	28.149	4691.33	5727.01	9919.48	423606	18188.3			52		M266T28	y
5	8	(Prop-2-yn-1-yl)germane	898069	-	Unknown	12.8166	3.67995	19.8875	0.000119833	0.00754066	UP	116.976	116.976	116.976	0.525167	0.525	0.529	6261.77	104213	90332.6	1.33702e+06	58034.2			31		M117T1	y
6	0	[2-(2-{[tert-Butyl(dimethyl)silyl]oxy}ethyl)phenyl]boronic acid	805999	-	Unknown	22.7871	4.51015	14.6639	0.000143756	0.00834847	UP	281.174	281.173	281.175	13.7072	13.6973	13.717	3768.98	7627.46	13211.1	178657	15282.7			9		M281T14	y
7	3	Oxaziridine-2-sulfonic acid	896580	-	Organic acids and derivatives	261.166	8.02882	44.0405	0.000509191	0.020738	UP	125.986	125.986	125.986	15.5167	15.488	15.5453	15990.6	18038.1	5636.99	4.71094e+06	184479			22		M126T16	y
8	2	Phosphorothioic O,O,O-acid--2,3-dichloropropan-1-ol (1/3)	977264	-	Organic acids and derivatives	3501.67	11.7738	40.3119	0.000614797	0.0230495	UP	498.901	498.901	498.901	28.0475	28.0383	28.0567	7972.63	0	0	1.11767e+06	48021.9			52		M499T28	y
9	6	PGE1 Alcohol	36124	C04741	Fatty Acyls	16.1992	4.01785	9.88404	0.000669706	0.0241119	UP	341.266	341.266	341.267	31.7967	31.7778	31.8155	5623.45	41070.4	71136	668756	83894.5			7		M341T32	y
10	2	Benzensulfonate	307388	-	Benzene and substituted derivatives	10.2875	3.36282	10.7305	0.000836285	0.0268746	UP	158.003	158.003	158.003	0.525167	0.525	0.529	20489.2	404838	339089	4.16476e+06	503337			31		M158T1	y
11	0	1-Propene, 1,1-dichloro-3,3,3-trifluoro-	337400	-	Unknown	83.0555	6.376	26.6966	0.000861881	0.0272474	UP	164.948	164.948	164.948	19.205	19.14	19.27	8850.84	21179.2	23810.5	1.75905e+06	110209			23		M165T19	y
12	1	2,4,5-Trimethylaniline	268173	-	Benzene and substituted derivatives	3.52623	1.81813	8.70699	0.00117352	0.0309749	UP	136.112	136.112	136.112	26.1337	26.1307	26.1367	5635.98	121299	38167.7	427727	47528.4			29		M136T26	y
13	1	Silane, diphenyldi-2-propenyl-	355784	-	Benzene and substituted derivatives	6.4391	2.68686	10.3219	0.0012255	0.0314801	UP	265.141	265.141	265.141	13.5633	13.471	13.5828	57082.5	257436	200138	1.65766e+06	123094			9		M265T14	y
14	0	1,1-Propanediol, 2,2,3,3,3-pentafluoro-	337155	-	Organic oxygen compounds	33.0649	5.04723	20.3772	0.00134693	0.0325611	UP	167.013	167.012	167.013	5.78867	5.669	5.7915	3296.47	7847.1	5178.84	259464	20750.8			24		M167T6	y
15	0	Methyl 2-fluoro-4-(4,4,5,5-tetramethyl-1,3,2-dioxaborolan-2-yl)benzoate	772037	-	Benzene and substituted derivatives	7.26896	2.86175	8.19238	0.00147241	0.0335518	UP	281.136	281.136	281.136	10.1837	10.1823	10.215	11172.4	126199	104581	917337	130537			13		M281T10	y
16	3	4-tert-Butyl-2-(prop-2-en-1-yl)aniline	287913	-	Benzene and substituted derivatives	10.4713	3.38837	9.11607	0.00195939	0.0365163	UP	190.158	190.158	190.159	24.5502	24.463	24.6885	572.641	5645.96	8898.85	60234.6	5327.78			53		M190T25	y
17	0	([1,1'-Biphenyl]-4-yl)(phenyl)methanethione	289316	-	Unknown	2.57534	1.36476	7.2569	0.00201747	0.0367993	UP	275.089	275.089	275.089	5.81183	5.78867	5.835	11584.5	223713	62866.6	576138	55885.6			39		M275T6	y
18	0	2,2-Dichloroethane-1-peroxol	915537	-	Organohalogen compounds	384.834	8.58809	21.8192	0.00206435	0.0370191	UP	130.966	130.966	130.966	21.3757	21.289	21.4623	5720.34	2405.32	2923.88	966594	76483.3			44		M131T21	y
19	-	Unknown	-	-	-	4.96609	2.31211	7.29438	0.00208104	0.0370956	UP	136.084	136.084	136.084	4.32633	4.32383	4.33	9264.71	303757	218287	1.50848e+06	184885	[2][M+1]+		20		M136T4	n
20	2	Benzensulfonate	307388	-	Benzene and substituted derivatives	206.488	7.68992	20.1826	0.002399	0.0383959	UP	158.003	158.003	158.003	5.81183	5.78867	5.835	14282.3	4375.08	3497.66	903401	77074.4			39		M158T6	y
21	2	Benzensulfonate	307388	-	Benzene and substituted derivatives	55.3414	5.79029	18.5098	0.00254122	0.0388953	UP	158.003	158.003	158.003	15.5342	15.488	15.5453	8256.92	37919	23316.9	2.09849e+06	191402			22		M158T16	y
22	4	2-carboxybenzenesulfonate	478528	-	Benzene and substituted derivatives	251.663	7.97535	18.6336	0.0027677	0.0396064	UP	201.992	201.992	201.992	23.9472	23.702	23.9535	2632.92	1111.96	1925.97	333389	30826.2			47		M202T24	y
23	0	(2-Fluoro-5-phenoxyphenyl)boronic acid	281194	-	Unknown	2.17827	1.12318	17.7907	0.00287485	0.0399115	UP	233.078	233.077	233.079	6.43	6.4015	6.6305	10417.1	306251	3509.76	667099	34955.3			19		M233T6	y
24	-	Unknown	-	-	-	34.4477	5.10634	11.7171	0.00291465	0.0400203	UP	333.334	333.334	333.334	21.2306	21.1722	21.289	2337.13	8424.17	14591.1	297523	40167.1			44		M333T21	n
25	0	2,2-Dichloroethane-1-peroxol	915537	-	Organohalogen compounds	160.781	7.32895	18.1121	0.00296796	0.0401623	UP	130.966	130.966	130.966	19.27	19.14	19.2745	4792.57	6318.84	4788.64	1.01595e+06	96431.6			23		M131T19	y
26	-	Unknown	-	-	-	17.8898	4.16107	8.19809	0.00331925	0.041004	UP	345.356	345.356	345.356	31.3998	31.289	31.4647	5068.8	34812.1	60296.2	626589	109527	[36][M+1]+		7		M345T31	n
27	1	2-(Butan-2-yl)-4-methylquinoline	274961	-	Quinolines and derivatives	15.2889	3.93441	7.47272	0.00361604	0.0416088	UP	200.143	200.143	200.143	31.7267	31.638	31.8155	2252	16764.5	29037	259565	48207.4			7		M200T32	y
28	0	Guanine, 8-(p-nitrophenyl)-	426722	-	Nucleosides	2.75277	1.46089	7.74686	0.00373952	0.0418366	UP	273.073	273.073	273.073	7.97675	7.91467	8.049	6971.14	263975	90124.8	726663	50784.5			6		M273T8	y
29	-	Unknown	-	-	-	401.137	8.64795	16.0702	0.00384003	0.042013	UP	156.948	156.948	156.948	15.5342	15.488	15.5453	10282.5	6709.43	5005.05	2.6914e+06	289313			22		M157T16	y
30	9	2,6,13,17-Tetraazatricosan-23-ol	364456	-	Organic acids and derivatives	145.743	7.18728	15.7762	0.00387171	0.042067	UP	345.356	345.355	345.356	21.0986	21.025	21.1722	1341.82	1318.9	1372.17	207726	22619.6			50		M345T21	y
31	-	Unknown	-	-	-	1273.35	10.3144	15.9482	0.00390865	0.042129	UP	110.009	110.009	110.009	11.603	11.603	11.603	5360.38	0	0	406430	44140.4			5		M110T12	n
32	1	4-Octyloxyphenylboronic acid	487291	-	Unknown	353.711	8.46643	15.7087	0.00396703	0.042225	UP	251.181	251.181	251.181	18.7477	18.745	18.7505	6467.67	4470.14	7742.51	1.6564e+06	181978			23		M251T19	y
33	0	beta-D-Ribofuranuronamide, 1-(6-amino-9H-purin-9-yl)-1-deoxy-N-(2-ethoxy-2-oxoethyl)-, monohydrate	310090	-	Azoles	2.91369	1.54285	7.09497	0.00400475	0.0422857	UP	367.136	367.136	367.136	10.1837	10.1823	10.215	23653.2	255821	62983.6	745383	101571			13		M367T10	y
34	1	4-Nitroprocainamide	438370	-	Organic acids and derivatives	300.773	8.23253	14.8429	0.00442621	0.0432516	UP	266.15	266.149	266.15	13.6973	13.471	13.717	15469.5	4578.64	7930.44	1.44113e+06	167448			9		M266T14	y
35	-	Unknown	-	-	-	3.08633	1.62589	5.98711	0.00461645	0.0436419	UP	138.063	138.063	138.063	4.32508	4.29167	4.463	16925.7	792194	296363	2.44497e+06	375218	[2][M+2]+		20		M138T4	n
36	-	Unknown	-	-	-	4.03503	2.01258	7.14424	0.00462748	0.0436638	UP	289.293	289.293	289.293	11.7367	11.735	11.7378	95670	508173	324548	2.05049e+06	185699	[24][M+1]+		5		M289T12	n
37	2	Phosphoroselenoic acid	58177	C05172	Inorganic compounds	8.885	3.15137	7.52801	0.00488174	0.0441456	UP	162.907	162.907	162.907	19.27	19.14	19.2745	3624.13	78247.5	126324	696174	65234.2			23		M163T19	y
38	-	Unknown	-	-	-	2769.14	11.4352	13.9774	0.00507957	0.0444937	UP	317.324	317.324	317.325	19.205	19.14	19.27	3296.72	0	0	883856	109525	[31][M+1]+		23		M317T19	n
39	0	Silane, naphthalenylphenyl-	588494	-	Benzene and substituted derivatives	4.69505	2.23114	5.75004	0.00522972	0.0447436	UP	235.094	235.094	235.094	5.13492	5.11283	5.157	6062.63	49110.9	42679.4	230578	34152.9			42		M235T5	y
40	1	2-(Trifluoroacetyl)cyclooctan-1-one	347206	-	Organic oxygen compounds	4.59468	2.19996	10.705	0.00555709	0.0452502	UP	223.094	223.094	223.094	5.78867	5.669	5.7915	21218.6	247294	139370	1.13624e+06	35536.1			24		M223T6	y
41	4	N-(2,3-Dibromopropyl)formohydrazide	895779	-	Benzene and substituted derivatives	27.4864	4.78065	9.36582	0.00558459	0.0452905	UP	258.909	258.908	258.909	21.7362	21.636	21.8365	698.537	2170.46	3759.35	65507	11093.3			43		M259T22	y
42	-	Unknown	-	-	-	94.2576	6.55854	12.4335	0.00568751	0.0454386	UP	319.303	319.303	319.303	25.7036	25.6897	25.7175	2917.59	3344.3	5792.49	335282	45876.5	[33][M+1]+		35		M319T26	n
43	0	Propan-1-ol--triphenylsilanol (1/1)	971467	-	Unknown	6.96353	2.79982	7.47687	0.00571313	0.0454748	UP	337.162	337.162	337.162	13.5828	13.5633	13.669	5206.37	64129.7	38376.5	446569	79850.4			9		M337T14_1	y
44	-	Unknown	-	-	-	1154.65	10.1732	12.8723	0.00598103	0.0458378	UP	275.277	275.277	275.277	29.2103	29.1437	29.277	3130.41	0	0	368541	49589.5			12		M275T29	n
45	0	1,3-bis(2-ethylhexoxy)propan-2-amine	529244	-	Unknown	14491.4	13.8229	12.7339	0.00611058	0.0460038	UP	316.321	316.321	316.321	19.2722	19.27	19.2745	15060.2	0	0	4.62537e+06	629138	[31][M]+		23		M316T19	y
46	-	Unknown	-	-	-	134.491	7.07137	12.2015	0.0065367	0.0465108	UP	110.009	110.008	110.009	23.9472	23.702	23.9535	3349.21	2808.04	2653.95	391965	55178.5			47		M110T24	n
47	4	Diethyl (2-methoxyethyl)propylpropanedioate	450712	-	Organic acids and derivatives	658.103	9.36217	12.1137	0.0067458	0.0467397	UP	261.169	261.169	261.169	18.7477	18.745	18.7505	1151.68	0	0	210054	30034.1			23		M261T19	y
48	0	3-Oxooctanoic acid glycerides	94392	-	Organic compounds	29.8441	4.89937	11.0683	0.00705163	0.0470538	UP	250.141	250.141	250.141	4.94667	4.93433	4.959	3716.07	9858.08	6100.13	294206	44076.7			42		M250T5	y
49	1	1-(3-Isocyanatopropoxy)undecane	762269	-	Prenol lipids	2.16862	1.11677	5.46118	0.00708137	0.0470831	UP	256.227	256.227	256.227	14.3893	14.347	14.52	8742.68	206645	61948.4	448134	45037.5			32		M256T14	y
50	0	Ammonium pentadecanoate	520164	-	Fatty Acyls	243.457	7.92753	11.401	0.00756531	0.0475321	UP	260.258	260.258	260.259	19.27	19.14	19.2745	3926.6	3446.67	3563.18	865020	130842			23		M260T19_2	y
51	0	Phosphohydroxypyruvic acid	484	C03232	Organic oxygen compounds	5.08988	2.34763	5.14585	0.00758071	0.0475456	UP	184.985	184.985	184.985	29.6908	29.6255	29.8875	19685.3	358192	310380	1.8237e+06	383388			21		M185T30	y
52	1	L-Lysine mono(3-methyl-2-oxobutyrate)	400370	-	Organic acids and derivatives	1.74981	0.807197	5.32926	0.00771615	0.0476621	UP	263.162	263.162	263.162	12.942	12.8927	12.945	56470.8	990768	141660	1.73365e+06	195519	[18][M]+		33		M263T13	y
53	3	Oxaziridine-2-sulfonic acid	896580	-	Organic acids and derivatives	1036.95	10.0181	11.2974	0.00774356	0.0476853	UP	125.986	125.986	125.986	13.6832	13.669	13.6973	16649.6	1815.51	960.337	1.88259e+06	288348			9		M126T14	y
54	2	2,4,6(1H,3H,5H)-Pyrimidinetrione, 1,3-bis(2-methoxyethyl)-	370654	-	Diazines	5.41002	2.43563	6.20706	0.00787352	0.0477932	UP	245.113	245.112	245.113	9.653	9.61567	9.7835	7716.59	64866.3	37842.7	350928	70283.9			16		M245T10_1	y
55	0	5-[4-(trifluoromethyl)phenyl]cyclohexane-1,3-dione	377514	-	Organohalogen compounds	1.83512	0.875875	4.96313	0.00823482	0.0480776	UP	257.078	257.078	257.079	6.9945	6.942	6.99733	19828.4	310910	58583.1	570558	69128			18		M257T7	y
56	3	Oxaziridine-2-sulfonic acid	896580	-	Organic acids and derivatives	1291.12	10.3344	10.7697	0.00851084	0.0482806	UP	125.986	125.986	125.986	23.9472	23.702	23.9535	10104.1	855.426	780.774	1.24183e+06	199579			47		M126T24	y	mzmed similar as id 53=56but RT differnce
57	-	Unknown	-	-	-	1416.92	10.4685	10.7226	0.00858579	0.0483338	UP	122.964	122.964	122.964	21.636	21.4623	21.8365	3310.6	0	0	452255	73054.1			43		M123T22	n
58	0	5,7-Dimethyl[1,2,4]triazolo[1,5-a]pyrimidine-2-carbohydrazide	381623	-	Unknown	3.44068	1.7827	7.77493	0.00890018	0.0485482	UP	207.099	207.099	207.1	5.225	5.11567	5.42583	12547.4	243227	125486	836866	41744			42		M207T5	y
59	0	4-Octyloxyphenylboronic acid	487291	-	Unknown	755.198	9.56071	10.5283	0.00890128	0.0485489	UP	251.181	251.181	251.181	31.7267	31.638	31.8155	2288.88	0	0	241045	39655.1			7		M251T32	y
60	0	(2S,3R)-2-aminoheptadecane-1,3-diol	479551	-	Sphingolipids	7005.47	12.7743	10.4747	0.00899136	0.0486079	UP	288.29	288.29	288.29	23.1732	23.1623	23.1842	71062.1	868.063	1503.53	7.57186e+06	1.25191e+06			3		M288T23	y
61	0	(2S,3R)-2-aminoheptadecane-1,3-diol	479551	-	Sphingolipids	3.80603	1.92829	6.56133	0.00906809	0.0486574	UP	288.29	288.29	288.29	11.7367	11.735	11.7378	537618	2.93409e+06	1.98143e+06	1.11672e+07	893021	[24][M]+		5		M288T12	y
62	-	Unknown	-	-	-	12.8789	3.68694	7.30997	0.0091207	0.0486908	UP	111.984	111.984	111.984	21.7362	21.636	21.8365	938.959	6474.47	6311.6	83384.4	17095.4			43		M112T22	n
63	4	TG(12:0/12:0/17:2(9Z,12Z))[iso3] (Triacylglycerol)	98495	-	Glycerolipids	7.63524	2.93267	5.81523	0.00914481	0.0487061	UP	705.6	705.6	705.6	31.4322	31.3998	31.4647	25661.5	417090	722421	3.18621e+06	397945			7		M706T31	y
64	2	2,2,3,4,4-Pentafluorobut-3-enenitrile	760622	-	Unknown	10.9228	3.44927	7.98966	0.00921679	0.0487511	UP	158.003	158.003	158.003	21.7362	21.636	21.8365	1384.65	8477.45	5280.52	92597.7	17454.9			43		M158T22	y
65	0	Nonadecan-10-amine	472372	-	Unknown	15.3825	3.94322	6.23706	0.00950102	0.048923	UP	284.331	284.331	284.331	31.7267	31.638	31.8155	4448.75	32820.1	56846	508129	119127			7		M284T32	y
66	7	3,4-Dihydro-3-thioxo-1,2,4-triazin-5(2H)-one	334712	-	Unknown	1765.61	10.786	10.1748	0.00952158	0.0489351	UP	130.008	130.008	130.008	5.73025	5.669	5.7915	7592.37	0	0	563550	95932.6			24		M130T6	y
67	-	Unknown	-	-	-	3.41479	1.7718	4.68858	0.00955214	0.048953	UP	361.366	361.366	361.366	18.745	18.578	18.7505	23801.5	428497	281529	1.46323e+06	258565			23		M361T19	n
68	0	Adenosine, 3'-amino-3'-deoxy-2'-O-methyl-	588429	-	Nucleosides	5.51948	2.46453	4.69083	0.00955352	0.0489538	UP	281.136	281.136	281.136	12.2397	12.198	12.2897	14109.5	160865	181157	887892	198108			27		M281T12	y
69	0	Fructoselysine	71227	C16488	Organic acids and derivatives	16.5077	4.04507	9.08867	0.0097744	0.0492312	UP	309.167	309.167	309.167	11.603	11.603	11.603	11313.6	21493.8	11111.2	354813	62542.1			5		M309T12_2	y
70	1	(2-anilino-2-oxoethyl) N,N-dimethylcarbamodithioate	561208	-	Unknown	2.60749	1.38266	9.18876	0.0101214	0.0496484	UP	255.062	255.062	255.062	4.9335	4.93267	4.93433	8530.61	302224	90574.2	788046	13506.7			42		M255T5	y
71	2	Phosphorothioic O,O,O-acid--2,3-dichloropropan-1-ol (1/3)	977264	-	Organic acids and derivatives	1453.06	10.5049	9.81941	0.0102126	0.0497545	UP	498.901	498.901	498.901	31.7967	31.7778	31.8155	5349.57	0	0	463791	81808.3			7		M499T32	y
72	1	Ammonium pentadecanoate	520164	-	Fatty Acyls	184.571	7.52803	9.70243	0.0103022	0.0498572	UP	260.258	260.258	260.258	11.9297	11.9212	11.9382	3476.76	1951.29	3379.74	399426	70875.6			11		M260T12	y
73	2	1-Hydroxy-3-methyl-3,4-dihydro-2(1H)-quinoxalinone 4-oxide compound with N,N-diethylamine (1:1)	321218	-	Organic nitrogen compounds	548.688	9.09984	9.64444	0.0105806	0.0504224	UP	266.15	266.15	266.151	31.7267	31.638	31.8155	1460.08	0	0	175131	31451.8			7		M266T32	y
74	6	3,4-Dihydro-3-thioxo-1,2,4-triazin-5(2H)-one	334712	-	Unknown	2073.25	11.0177	9.2523	0.0114808	0.0521368	UP	130.008	130.008	130.008	11.7358	11.735	11.7367	8054.14	0	0	661741	123879			5		M130T12	y
75	0	1-Decene, 4-(methylseleno)-	595827	-	Unknown	2.24393	1.16603	5.35165	0.012454	0.0538177	UP	235.096	235.096	235.096	6.9945	6.942	6.99733	17642.5	337021	63186.9	756252	120072			18		M235T7	y
76	1	Diethylammonium diethyldithiocarbamate	343566	-	Unknown	2.70074	1.43335	6.25034	0.0127955	0.0543695	UP	223.131	223.131	223.131	9.71825	9.653	9.7835	24242.6	277920	122318	750588	46848.4			16		M223T10	y
77	-	Unknown	-	-	-	423.057	8.72471	8.7197	0.0128982	0.054532	UP	361.365	361.364	361.365	23.2327	23.1623	23.303	1432.61	0	0	135032	26822.2	[38][M+1]+		3		M361T23	n
78	2	N,N-Dimethyldodecylamine-N-oxide	265686	-	Organic nitrogen compounds	55.9639	5.80642	8.18231	0.0129894	0.0546748	UP	230.247	230.247	230.248	19.3487	19.2745	19.4228	2145.04	3639.91	6304.52	215612	44425.7			23		M230T19	y
79	0	cis-4-(6-Amino-9H-purin-9-yl)-D-prolinol	421875	-	Unknown	2.91968	1.54581	6.56314	0.0131649	0.0549462	UP	235.13	235.13	235.131	9.34983	9.20183	9.388	48826.6	511177	82252.6	1.49247e+06	245561			14		M235T9	y
80	6	7-Bromo-6-hydroxy-1,2-dimethylquinolin-1-ium iodide	947989	-	Quinolines and derivatives	9.66431	3.27267	6.19094	0.0131701	0.054954	UP	379.916	379.916	379.917	28.9792	28.843	29.105	8175.11	140583	121387	1.35864e+06	318425			12		M380T29	y
81	6	N-butyl arachidonoyl amine	36683	-	Fatty Acyls	1.54446	0.627103	4.34326	0.0133681	0.0552546	UP	360.324	360.324	360.324	30.2731	30.2083	30.3378	48333.9	695301	95211.9	1.07387e+06	117158			17		M360T30	y
82	-	Unknown	-	-	-	7.21291	2.85058	5.70672	0.0137783	0.0558596	UP	706.604	706.603	706.604	31.4322	31.3998	31.4647	12935.2	219750	380619	1.58657e+06	165004	[55][M+1]+		7		M707T31	n
83	0	Mannopine	71286	C16692	Organic compounds	11.715	3.55028	6.3442	0.0138154	0.0559131	UP	311.146	311.146	311.147	14.3687	14.347	14.3893	6412.96	29848.2	28636.1	350918	82846.9			32		M311T14	y
84	1	Pendimethalin	281690	C11019	Benzene and substituted derivatives	2.25905	1.17572	4.12389	0.0146261	0.0570392	UP	282.144	282.144	282.144	10.1837	10.1823	10.215	10464	170204	65050.4	384499	62203.9			13		M282T10	y
85	4	2-Chloro-1-methylpyridinium iodide	272571	-	Pyridines and derivatives	108.32	6.75915	8.01786	0.0149731	0.0574966	UP	255.939	255.939	255.939	23.7507	23.702	23.7993	657.475	462.46	801.004	73142.7	15680.2			47		M256T24	y
86	0	1,1,1-Trifluoro-2-hydroxy-6-methylhept-2-en-4-one	271853	-	Unknown	3.99792	1.99925	6.42276	0.0152748	0.0578829	UP	197.078	197.078	197.079	6.61275	6.5475	6.678	5568.44	62653.6	14551.6	250484	48517.8			19		M197T7	y
87	2	Aleprylic acid	34856	-	Fatty Acyls	3.11539	1.63941	4.0737	0.0152753	0.0578836	UP	197.153	197.153	197.153	11.2184	11.1518	11.285	7452.58	91180.3	59610.1	284062	56322			1		M197T11	y
88	-	Unknown	-	-	-	6.31738	2.65933	4.43694	0.0153331	0.0579564	UP	621.504	621.504	621.504	31.4322	31.3998	31.4647	2991.4	55188.8	95589.8	349993	64082.9			7		M622T31	n
89	0	1-O-Hexadecyl-2-desoxy-2-amino-sn-glycerol	594895	-	Glycerolipids	2.65546	1.40896	5.29413	0.0154	0.0580403	UP	316.321	316.321	316.321	29.0421	28.843	29.1565	60883.9	3.38203e+06	768128	8.98087e+06	1.6629e+06	[29][M]+		12		M316T29	y
90	2	2-[1-(4-Fluorophenyl)ethenyl]-4,4,5,5-tetramethyl-1,3,2-dioxaborolane	809166	-	Unknown	2.8144	1.49283	4.04967	0.0155673	0.058248	UP	249.146	249.146	249.146	11.1518	11.025	11.285	39412.4	409536	230608	1.1526e+06	218685			1		M249T11	y
91	0	3H-Phosphol-3-one, 5-ethoxy-1,2-dihydro-1-phenyl-, 1-sulfide	618896	-	Unknown	4.20905	2.0735	5.30536	0.0156118	0.0583026	UP	253.045	253.044	253.045	4.32508	4.29167	4.463	17735.4	571309	247947	2.40467e+06	544769			20		M253T4_1	y
92	0	1,1,1-trifluoro-6-methylhept-5-ene-2,4-dione	536290	-	Organic oxygen compounds	3.79166	1.92283	4.60813	0.0158326	0.0585711	UP	195.063	195.063	195.063	3.6365	3.63417	3.669	11098.3	503825	271928	1.91033e+06	453365			40		M195T4	y
93	1	5,9-dinitrotridecane-2,12-dione	290266	-	Unknown	4.6978	2.23199	7.28768	0.0159544	0.058717	UP	303.155	303.155	303.155	13.6832	13.669	13.6973	10155.6	67484.9	9370.91	317031	58564.2			9		M303T14	y
94	-	Unknown	-	-	-	2.17165	1.11879	4.0737	0.0159929	0.0587629	UP	317.325	317.324	317.325	28.9792	28.843	29.0168	12134.7	852352	323689	1.85101e+06	274803			12		M317T29_2	n
95	0	C16 Sphinganine	41556	C13915	Sphingolipids	5779.18	12.4966	7.80184	0.0160347	0.0588125	UP	274.274	274.274	274.274	25.7036	25.6897	25.7175	16164.7	0	0	1.8446e+06	409512			35		M274T26	y
96	4	ecdysone palmitate	57692	C02681	Sterol lipids	2.09757	-1.06872	-5.85647	0.016375	0.0593735	DOWN	703.548	703.547	703.548	28.4879	28.4783	28.4975	2764.94	231625	11907.4	110425	33809.2			49		M704T28	y
97	2	coumarinic acid methyl ether	43849	-	Cinnamic acids and derivatives	8.96644	3.16454	6.35936	0.0168318	0.0601067	UP	179.07	179.07	179.07	6.65425	6.6305	6.678	6377.45	38725.3	21963.7	347228	81103.2			45		M179T7	y
98	0	Guanine, 8-(p-nitrophenyl)-	426722	-	Nucleosides	2.10899	1.07656	5.5605	0.0170013	0.0603731	UP	273.073	273.073	273.073	6.04258	6.016	6.06917	17548.6	515496	166284	1.08718e+06	63719.7			37		M273T6	y
99	1	4-nitro-5-piperazinothiophene-2-sulfonamide	470139	-	Unknown	2.50141	1.32274	4.02671	0.0172728	0.0607937	UP	293.037	293.037	293.037	6.43	6.4015	6.5475	16403.6	324216	131064	810998	163292			19		M293T6_1	y
100	0	Heptadecanoyl Ethanolamide	3717	-	Organic nitrogen compounds	2.6506	1.40632	5.41769	0.0177416	0.0615044	UP	314.305	314.305	314.305	14.3687	14.347	14.3893	26921.9	261345	128460	692723	50178.2			32		M314T14	y
101	-	Unknown	-	-	-	3.37198	1.75359	3.8604	0.018685	0.0628717	UP	280.162	280.162	280.162	19.27	19.14	19.2745	7410.24	216388	152226	729657	172800	[23][M+1]+		23		M280T19	n
102	0	Heptadecanoyl Ethanolamide	3717	-	Organic nitrogen compounds	66.7735	6.0612	7.14589	0.0189614	0.0632571	UP	314.305	314.305	314.305	20.2354	20.231	20.2398	2945.84	4758.39	1911.72	317734	75836.2			2		M314T20	y
103	1	Heptadecanoyl Ethanolamide	3717	-	Organic nitrogen compounds	3.24122	1.69654	3.83747	0.0202202	0.0649326	UP	314.305	314.305	314.306	29.3471	29.1863	29.541	10784.2	295615	186543	958151	233720			34		M314T29_1	y
104	0	2,2-Dichloroethane-1-peroxol	915537	-	Organohalogen compounds	91.4967	6.51565	6.82021	0.0204422	0.0652152	UP	130.966	130.966	130.966	23.6456	23.5892	23.702	4289.91	4380.24	6185.63	410512	102955			47		M131T24	y
105	1	3E,5E-tridecadienoic acid	34909	-	Fatty Acyls	3.12832	1.64539	6.79878	0.0207374	0.0655852	UP	211.169	211.169	211.169	12.942	12.8927	12.945	10714.1	116575	63144	364684	2842.29			33		M211T13	y
106	-	Unknown	-	-	-	2.90356	1.53782	3.78772	0.0208165	0.0656833	UP	141.958	141.958	141.958	5.7915	5.78867	5.835	21058.5	742367	501687	2.15551e+06	407290			39		M142T6	y
107	0	Pelargonic acid morpholide	275410	-	Fatty Acyls	33.1801	5.05225	6.49404	0.0212755	0.0662436	UP	228.196	228.196	228.196	25.7036	25.6897	25.7175	6838.28	18011.9	18766.3	601169	154400			35		M228T26	y
108	1	N,N-Dimethyldodecylamine-N-oxide	265686	-	Organic nitrogen compounds	8.43253	3.07597	4.03511	0.0214915	0.0665021	UP	230.248	230.248	230.248	31.7967	31.7778	31.8155	3125.99	39053.5	67642.7	331115	105551			7		M230T32	y
109	-	Unknown	-	-	-	430.481	8.74981	6.66064	0.0218032	0.0668697	UP	122.964	122.964	122.964	15.1661	15.14	15.1922	6700.82	3157.77	1823.93	1.35936e+06	352665			22		M123T15	n
110	1	Cyclohexylcarbamodithioic acid--N,N-diethylethanamine (1/1)	650791	-	Organic nitrogen compounds	2.33977	1.22637	4.0644	0.0224632	0.0676268	UP	277.177	277.177	277.177	14.5237	14.52	14.529	57984.2	599703	292876	1.40317e+06	177370	[21][M]+		30		M277T15	y
111	3	1,1,1,2-tetrachloro-2-fluoroethane	305139	-	Organohalogen compounds	12.8097	3.67917	4.71871	0.022752	0.0679495	UP	184.888	184.888	184.889	19.27	19.14	19.2745	1682.73	23385.2	39842.3	300921	93758			23		M185T19	y
112	5	Rozenite (Fe(SO4).4H2O)	349579	-	Unknown	50.042	5.64507	6.423	0.022948	0.0681655	UP	224.935	224.935	224.935	15.5167	15.488	15.5453	3084.8	13372.3	10965.9	669177	176507			22		M225T16	y
113	1	Dodecanoic acid, ammonium salt	289881	-	Fatty Acyls	54.4973	5.76811	6.40489	0.0229846	0.0682055	UP	218.211	218.211	218.211	25.7036	25.6897	25.7175	2572.87	5644.39	5660.59	313402	83033.1			35		M218T26	y
114	7	(Prop-2-yn-1-yl)germane	898069	-	Unknown	125.621	6.97294	6.43499	0.0230306	0.0682559	UP	116.976	116.976	116.976	5.72425	5.657	5.7915	4063.9	3984.49	6901.34	527267	140678			24		M117T6	y
115	2	2-lauroleic acid	34726	-	Fatty Acyls	430.276	8.74912	6.47119	0.0230538	0.0682811	UP	199.169	199.169	199.169	11.9361	11.934	11.9382	5461.97	117.67	203.811	142188	38025.3			11		M199T12	y
116	3	2,2,3,4,4-Pentafluorobut-3-enenitrile	760622	-	Unknown	512.78	9.0022	6.41112	0.0234622	0.0687213	UP	158.003	158.003	158.003	13.5269	13.471	13.5828	9939.54	1457.43	2524.34	856454	230975			9		M158T14	y
117	1	1-Heptadecanamine, N,N-dimethyl-, acetate	371831	-	Unknown	100.751	6.65464	6.31213	0.0237279	0.0690024	UP	344.353	344.352	344.353	31.7267	31.638	31.8155	20249.5	22919.2	39697.2	2.33056e+06	631972	[36][M]+		7		M344T32	y
118	-	Unknown	-	-	-	8.04232	3.00761	4.12698	0.0243878	0.0696838	UP	280.161	280.161	280.161	12.2397	12.198	12.2897	14640.8	59138.1	83698.4	476464	153854	[22][M+1]+		27		M280T12	n
119	6	17,20-dimethyl Prostaglandin F1α	45618	-	Fatty Acyls	6.48146	2.69632	5.3007	0.0248016	0.0700989	UP	385.292	385.292	385.292	31.4322	31.3998	31.4647	4001.95	85410.4	147935	554963	40696			7		M385T31	y
120	-	Unknown	-	-	-	302.166	8.2392	6.19619	0.0250598	0.0703535	UP	122.964	122.964	122.964	23.6456	23.5892	23.702	2576.43	767.773	713.079	264143	73619.1			47		M123T24_1	n
121	0	1,1,1,2-tetrachloro-2-fluoroethane	305139	-	Organohalogen compounds	3.74132	1.90355	3.52808	0.025478	0.0707586	UP	184.889	184.888	184.889	25.6438	25.388	25.7175	3202.31	172035	149008	644035	177457			35		M185T26	y
122	3	2,2-Difluorohexane	656643	-	Unknown	5.4778	2.4536	3.83452	0.0260645	0.0713123	UP	123.098	123.097	123.098	31.7267	31.638	31.8155	2402.38	51225.6	88725.4	281769	54517.8			7		M123T32	y
123	1	Discadenine	64088	C01804	Nucleosides	1.83701	0.877359	4.88841	0.0262875	0.0715186	UP	305.172	305.172	305.172	13.6973	13.669	13.717	31853.5	488104	137476	896652	45329			9		M305T14	y
124	0	D-erythro-Sphingosine (Sphingosine)	41557	-	Sphingolipids	288.432	8.17209	6.02811	0.0263851	0.0716081	UP	286.274	286.274	286.274	23.4316	23.372	23.4912	12844	2944.04	5099.23	910529	260725			3		M286T23	y
125	0	Heptadecanoyl Ethanolamide	3717	-	Organic nitrogen compounds	5.68186	2.50636	3.44215	0.026497	0.0717102	UP	314.305	314.305	314.306	31.7182	31.638	31.8155	9363.93	194707	337243	1.10751e+06	311822			7		M314T32	y
126	-	Unknown	-	-	-	409.897	8.67912	6.01068	0.0265573	0.071765	UP	275.277	275.277	275.277	14.5245	14.52	14.529	13916.4	2576.37	4462.41	1.14327e+06	328674			30		M275T15	n
127	0	Bis(benzyloxy)(methyl)phenylsilane	672413	-	Unknown	3.10462	1.63441	3.84571	0.0266711	0.071868	UP	335.146	335.146	335.146	9.36783	9.34983	9.388	4730.07	80004.1	65114.3	248382	38872.2			14		M335T9	y
128	0	Trimethyl(2-phenylpenta-1,3,4-trien-1-yl)silane	901483	-	Unknown	205.172	7.68069	5.96498	0.0268788	0.0720543	UP	215.125	215.125	215.125	25.7036	25.6897	25.7175	5464.57	2970.19	5144.53	653060	188696			35		M215T26	y
129	-	Unknown	-	-	-	1.66449	0.735083	5.32874	0.0271718	0.0723141	UP	339.345	339.345	339.345	30.2731	30.2083	30.3378	51488	643080	135558	1.0704e+06	30268.3	[34][M+1]+		17		M339T30	n
130	0	Dibutylamine, compd. with hexafluorophosphate	283399	-	Organic nitrogen compounds	3.26657	1.70778	3.58551	0.027318	0.0724422	UP	275.123	275.123	275.123	13.5633	13.471	13.5828	7332.53	108371	96626.1	354002	68868.5			9		M275T14	y
131	0	3-Methylbenzoic acid	269208	-	Benzene and substituted derivatives	3.37906	1.75662	5.56672	0.0274978	0.0725987	UP	137.06	137.06	137.06	4.32508	4.29167	4.33	182410	8.36123e+06	980237	2.82531e+07	6.11112e+06			20		M137T4	y
132	0	Heptadecanoyl Ethanolamide	3717	-	Organic nitrogen compounds	325.528	8.34664	5.88497	0.0276543	0.0727337	UP	314.305	314.305	314.305	23.2818	23.058	23.303	4164.25	822.453	1424.53	337000	98932.7			3		M314T23	y
133	1	Metazine	364768	-	Unknown	1593.98	10.6384	5.87014	0.0278147	0.0728709	UP	250.178	250.178	250.178	25.7036	25.6897	25.7175	52692	2864.04	2858.27	4.73482e+06	1.39621e+06	[15][M]+		35		M250T26	y
134	-	Unknown	-	-	-	6.55588	2.71279	3.44943	0.0283724	0.0734086	UP	462.327	462.327	462.327	31.7967	31.7778	31.8155	6078.78	77445.5	134140	509118	170262	[48][M+1]+		7		M462T32	n
135	0	2,6-Diaminopurine 2',3'-dideoxyriboside	401071	-	Nucleosides	3.23424	1.69342	3.71351	0.0285563	0.073583	UP	251.125	251.125	251.125	11.603	11.603	11.603	81542.4	731849	650153	2.36732e+06	398980			5		M251T12	y
136	1	2,2-Diphenyl-1-(trimethylsilyl)cyclopropane-1-carboxylic acid	684502	-	Unknown	2.51506	1.33059	3.3191	0.0294609	0.0744204	UP	311.146	311.146	311.146	9.69958	9.61567	9.7835	3535.32	78458.4	44648.9	197327	43061.8			16		M311T10	y
137	-	Unknown	-	-	-	5.26692	2.39696	3.74926	0.0294836	0.074441	UP	507.86	507.86	507.86	31.7267	31.638	31.8155	936.777	16557	28677.6	88325.1	16638.5			7		M508T32	n
138	-	Unknown	-	-	-	385.362	8.59007	5.61796	0.0302537	0.0751277	UP	720.606	720.606	720.606	31.7267	31.638	31.8155	1301.44	0	0	123000	37921.8			7		M721T32	n
139	1	1-Aminocycloundecane-1-carboxylic acid	346254	-	Organic compounds	1.90658	0.930987	4.98494	0.0305996	0.0754288	UP	214.18	214.18	214.18	9.653	9.61567	9.7835	26455	762569	54807	1.4539e+06	233871			16		M214T10	y
140	1	(2S,3R)-2-aminoheptadecane-1,3-diol	479551	-	Sphingolipids	2.79905	1.48494	4.93896	0.0306068	0.0754351	UP	288.29	288.29	288.29	26.5978	26.5955	26.6002	108852	2.8584e+06	1.75161e+06	8.00078e+06	429053			25		M288T27	y
141	1	4-Octyloxyphenylboronic acid	487291	-	Unknown	2055.12	11.005	5.52761	0.0312046	0.075945	UP	251.181	251.181	251.181	21.4449	21.4275	21.4623	4975.02	0	0	655954	205540			44		M251T21	y
142	-	Unknown	-	-	-	3.44458	1.78433	3.7868	0.0312928	0.0760191	UP	337.852	337.851	337.852	23.6456	23.5892	23.702	903.839	21693.6	21397.1	74725.2	11425			47		M338T24	n
143	1	5-(4-benzylpiperazino)-1H-1,2,4-triazol-3-ylamine	424058	-	Benzene and substituted derivatives	4.81999	2.26903	4.86178	0.0313494	0.0760666	UP	259.166	259.166	259.167	14.3687	14.347	14.3893	2297.42	24378.3	32364	118016	8087.57			32		M259T14	y
144	0	Phytosphingosine	297165	C12144	Sphingolipids	5040.91	12.2995	5.47857	0.0317392	0.0763904	UP	318.3	318.3	318.3	15.1661	15.14	15.1922	16251.2	365.39	632.875	2.91454e+06	921318			22		M318T15	y
145	1	Ethyl bromodifluoroacetate	359430	-	Unknown	170.384	7.41264	5.46734	0.0318146	0.0764524	UP	202.951	202.951	202.951	19.2722	19.27	19.2745	13032.3	14893.9	15078.7	2.5558e+06	804816			23		M203T19	y
146	0	2-{4-[(Ethylsulfanyl)methyl]phenyl}-4,4,5,5-tetramethyl-1,3,2-dioxaborolane	282503	-	Unknown	4.75964	2.25085	4.24459	0.0328134	0.0773122	UP	279.159	279.158	279.159	19.27	19.14	19.2745	41376.8	826708	445764	3.93483e+06	1.18738e+06	[23][M]+		23		M279T19	y
147	8	3-Fluoro-2-(hexadecyloxy)propan-1-ol	917193	-	Organic oxygen compounds	275.445	8.10562	5.3394	0.0333326	0.0777459	UP	319.303	319.303	319.303	23.4891	23.487	23.4912	2793.59	0	0	87916.9	28519.4			3		M319T23	y
148	0	Benzylamine, N,N-dioctyl-	455605	-	Benzene and substituted derivatives	1525.97	10.5755	5.2902	0.0339226	0.0782284	UP	332.331	332.331	332.331	31.3034	31.207	31.3998	28868.7	2623.1	4543.34	4.32749e+06	1.41599e+06			41		M332T31	y
149	0	Trimethyl(2-phenylpenta-1,3,4-trien-1-yl)silane	901483	-	Unknown	445.294	8.79861	5.26382	0.0342323	0.0784774	UP	215.125	215.125	215.125	19.27	19.14	19.2745	3100.04	1374.89	2381.37	706981	232166			23		M215T19_2	y
150	-	Unknown	-	-	-	77.6305	6.27855	5.24669	0.0342885	0.0785222	UP	110.009	110.008	110.009	5.81183	5.78867	5.835	6840.96	4679.25	4154.7	371512	121029			39		M110T6	n
151	0	3-Chloro-4-(ethylsulfanyl)-5-(2,4,6-trimethylphenyl)furan-2(5H)-one	689971	-	Unknown	3.56209	1.83272	4.85812	0.0347014	0.0788488	UP	297.071	297.071	297.071	6.06917	6.016	6.20383	11418.5	122613	20777	436760	110058			37		M297T6	y
152	1	Hexylamine	270589	C08306	Organic nitrogen compounds	2.60094	1.37904	3.41426	0.0350502	0.0791209	UP	102.128	102.128	102.128	26.1337	26.1307	26.1367	87021.8	2.81509e+06	1.93305e+06	7.32189e+06	1.22085e+06			29		M102T26	y
154	-	Unknown	-	-	-	5.6741	2.50439	4.57394	0.0361602	0.0799632	UP	622.506	622.505	622.506	31.3998	31.207	31.4647	1899.03	39275.6	68027.3	224061	16391.1			7		M623T31	y
155	-	Unknown	-	-	-	3.34386	1.74152	3.2422	0.0363126	0.0800763	UP	505.442	505.442	505.443	29.3511	29.285	29.4172	54680	379471	385656	1.2689e+06	277558			34		M505T29	n
156	0	Benzylamine, N,N-dioctyl-	455605	-	Benzene and substituted derivatives	26.2402	4.71371	4.96998	0.0365429	0.0802458	UP	332.331	332.331	332.331	29.34	29.277	29.403	24676.4	89753	81971.5	2.35514e+06	785226			34		M332T29	y
157	0	N-Cyclohexanecarbonylpentadecylamine	45078	-	Unknown	1.57407	0.654499	4.11322	0.0369277	0.0805259	UP	338.342	338.342	338.342	30.2731	30.2083	30.3378	204224	2.76072e+06	629398	4.34556e+06	221893	[34][M]+		17		M338T30	y
158	1	Methanol, (4,6-bis(bis(butoxymethyl)amino)-s-triazin-2-ylimino)di-	387543	-	Unknown	5.51162	2.46248	4.3461	0.0369951	0.0805746	UP	531.387	531.387	531.387	31.7267	31.638	31.8155	3640.55	96849.3	167748	534970	48448			7		M531T32	y
160	0	N,N-Dimethyldodecylamine-N-oxide	265686	-	Organic nitrogen compounds	1.96231	0.97255	3.26839	0.0377644	0.0811218	UP	230.248	230.248	230.248	11.603	11.603	11.603	302322	3.03743e+06	1.28939e+06	5.96037e+06	858379			5		M230T12	y
161	-	Unknown	-	-	-	5.27164	2.39825	4.03167	0.0380834	0.0813443	UP	137.024	137.024	137.024	31.4322	31.3998	31.4647	3742.37	86674.5	150125	458038	54002.7	[3][M+1]+		7		M137T31	n
162	3	N,N-Dimethylaniline	265673	C02846	Organic nitrogen compounds	1.69882	0.764531	3.07866	0.0382379	0.0814512	UP	122.096	122.096	122.096	29.0678	28.9792	29.1565	16231.9	1.17445e+06	351572	1.99517e+06	299332			12		M122T29	y
163	1	(3-Benzyl-1H-inden-1-yl)(trimethyl)silane	682724	-	Unknown	16.4608	4.04096	4.27401	0.0384483	0.0815958	UP	279.157	279.157	279.157	12.2397	12.198	12.2897	100423	156659	271342	2.58224e+06	944779	[22][M]+		27		M279T12	y
164	2	5-{[2-(6-Amino-9H-purin-9-yl)ethyl]amino}pentan-1-ol	469551	-	Unknown	3.09434	1.62963	3.52826	0.0388824	0.0818908	UP	265.178	265.178	265.178	14.5237	14.52	14.529	10713.1	108850	99500.1	336817	51223			30		M265T15	y
165	2	(1-Hydroxyethane-1,1-diyl)bis(phosphonate)	984518	-	Unknown	42.4471	5.40759	4.78372	0.0394628	0.0822783	UP	202.951	202.951	202.951	11.6704	11.603	11.7378	1130.28	1359.39	2354.52	66734.2	23553			5		M203T12	y
166	1	1-Dodecanamine acetate	344822	-	Organic nitrogen compounds	51.0051	5.67257	4.76265	0.0400964	0.0826924	UP	246.243	246.242	246.243	25.7036	25.6897	25.7175	2084.05	3313.05	5738.38	179836	63939.7			35		M246T26	y
167	1	N,N-Dimethyldodecylamine-N-oxide	265686	-	Organic nitrogen compounds	63.5635	5.99013	4.78456	0.0406553	0.0830505	UP	230.248	230.248	230.248	22.4746	22.465	22.4842	2208.6	3233.25	3585.69	212279	75591.4			36		M230T22	y
168	0	Stannanediamine	908301	-	Unknown	489.278	8.93451	4.75803	0.0414452	0.0835449	UP	152.947	152.947	152.947	5.81325	5.7915	5.835	2642.91	0	0	156168	56849.5			39		M153T6	y
169	0	Mannopine	71286	C16692	Organic compounds	4.09503	2.03387	3.39674	0.0415144	0.0835877	UP	311.146	311.146	311.146	11.934	11.9212	11.9382	7083.72	91868.5	68148	376204	127973			11		M311T12	y
170	0	Oxibendazole	312855	-	Unknown	697.932	9.44694	4.75252	0.0415354	0.0836006	UP	250.119	250.119	250.119	29.7499	29.7148	29.785	2392.66	0	0	222767	81187.1			21		M250T30	y
171	8	Mercury--palladium (2/1)	888087	-	Unknown	3.0571	1.61217	3.06057	0.0417416	0.0837272	UP	510.848	510.848	510.848	29.1243	29.105	29.1437	41354.1	278777	260353	852575	194072			12		M511T29	y
172	8	3-Fluoro-2-(hexadecyloxy)propan-1-ol	917193	-	Unknown	96.3229	6.58981	4.69632	0.0421445	0.083972	UP	319.303	319.303	319.303	19.3412	19.289	19.3933	3137.53	2185.67	3785.69	231026	84313.7			23		M319T19	y
173	2	2-carboxybenzenesulfonate	478528	-	Unknown	92.4673	6.53087	4.68942	0.0422395	0.0840292	UP	201.993	201.993	201.993	5.81325	5.7915	5.835	3486.21	2017.95	3495.19	206270	75360.2			39		M202T6	y
174	0	1,1,2,3-Tetrachloro-1,2,3,3-tetrafluoropropane	702093	-	Organohalogen compounds	3.34551	1.74222	3.73745	0.0423197	0.0840774	UP	252.876	252.876	252.877	23.1818	23.058	23.1842	1913.21	59749.6	60573.6	200248	23882.3			3		M253T23	y
175	1	1-Dodecanamine acetate	344822	-	Organic nitrogen compounds	255.038	7.99457	4.66855	0.0429263	0.0844378	UP	246.243	246.243	246.243	23.4891	23.487	23.4912	2174.87	340.684	590.083	141157	52239.9			3		M246T23	y
176	-	Unknown	-	-	-	458.486	8.84074	4.66037	0.0430885	0.084533	UP	259.283	259.283	259.283	31.3444	31.289	31.3998	1325.09	0	0	146340	54388.1			41		M259T31	n
177	9	Piperidine, 1-(3-(triethylsilyl)propyl)-, hydrochloride	459733	-	Organic compounds	1.67992	0.748395	3.13858	0.0431936	0.0845944	UP	278.209	278.209	278.209	14.3687	14.347	14.3893	53291.3	1.29441e+06	407828	2.17452e+06	263765			32		M278T14	y
178	3	4-Butoxy-1,1,1-trifluoro-4-methoxybutane	896816	-	Unknown	33.7605	5.07726	4.54249	0.0432234	0.0846117	UP	215.126	215.125	215.126	9.61567	9.60133	9.653	5211.02	9512.77	13128.4	324748	119480			16		M215T10	y
179	1	2,4,6-Trimethylacetophenone imine	517	-	Unknown	98.7955	6.62637	4.55765	0.04477	0.0861832	UP	162.128	162.128	162.128	23.566	23.521	23.611	1245.3	391.847	678.698	59735.1	22542.1			47		M162T24	y
180	4	Ceriporic acid A	45935	-	Fatty Acyls	2.57089	1.36227	3.02848	0.0450322	0.0864445	UP	327.251	327.251	327.251	18.6615	18.578	18.745	8873.68	239949	176953	616882	123129			28		M327T19	y
181	-	Unknown	-	-	-	211.136	7.72203	4.52237	0.045526	0.0869325	UP	169.976	169.976	169.976	13.5172	13.471	13.5633	2701.65	955.242	1654.53	246613	94071.3			9		M170T14	y
182	-	Unknown	-	-	-	3.23323	1.69298	3.38712	0.0459048	0.0873034	UP	507.456	507.452	507.459	29.8157	29.785	29.8463	4052.66	66335.2	32628	214477	68367.5			21		M507T30	n
183	-	Unknown	-	-	-	1002	9.96867	4.43078	0.0473475	0.0886892	UP	122.964	122.964	122.964	11.603	11.603	11.603	8827.67	584.892	1013.06	799278	312218			5		M123T12	n
184	2	2-Allylphenol	271883	-	Benzene and substituted derivatives	11.3493	3.50453	4.38218	0.0476981	0.0890197	UP	135.08	135.08	135.08	4.32692	4.32383	4.33	80398.9	1.02141e+06	251986	1.15923e+07	4.1705e+06	[2][M]+		20		M135T4	y
185	0	Platydesminium	86903	-	Quinolines and derivatives	6.91839	2.79044	3.23508	0.0478121	0.0891266	UP	275.152	275.152	275.152	29.5211	29.5012	29.541	4416.93	50293.9	73763.8	348689	141711			8		M275T30	y
186	2	(9R,13R)-1a,1b-dihomo-jasmonic acid	36062	-	Fatty Acyls	34.6176	5.11343	4.27577	0.0478438	0.0891564	UP	239.164	239.164	239.164	12.2397	12.198	12.2897	20433.8	14232.7	24651.8	500068	195255			27		M239T12	y
187	1	(2E)-[2-(Methanesulfonyl)hydrazinylidene]acetic acid	586226	-	Benzene and substituted derivatives	23.1469	4.53275	4.27615	0.0487161	0.0899658	UP	167.012	167.012	167.013	11.7378	11.735	11.9382	3448.26	10109	9426.29	236455	91195.2			5		M167T12	y
188	-	Unknown	-	-	-	4.59895	2.20131	2.91037	0.0487233	0.0899724	UP	289.293	289.293	289.293	31.7182	31.638	31.8155	39139	1.01049e+06	1.75023e+06	4.6482e+06	1.27418e+06	[25][M+1]+		7		M289T32	n
189	0	Adenosine, 2-amino-3'-deoxy-	607939	-	Nucleosides	1.95292	0.96563	2.81171	0.0492598	0.0904629	UP	267.12	267.12	267.12	6.41575	6.4015	6.43	12543.9	224965	86784.5	439337	99535.1			19		M267T6	y
191	7	3,4-Dihydro-3-thioxo-1,2,4-triazin-5(2H)-one	334712	-	Unknown	5422.66	12.4048	4.30689	0.0499089	0.0910493	UP	130.008	130.008	130.008	0.525167	0.525	0.529	8819.98	0	0	1.73081e+06	696060			31		M130T1	y

## Sheet: Table S3
Supplementary Table S3. Differentially accumulated metabolites (DAMs) in pairwise carbon source comparison between xylose versus sucrose
featureidx	ppm	Putative metabolites	METLIN ID	KEGG ID	Class	fold	log2fold	tstat	pvalue	qvalue	updown	mzmed	mzmin	mzmax	rtmed	rtmin	rtmax	maxint	dataset1_mean	dataset1_sd	dataset2_mean	dataset2_sd	isotopes	adducts	peakgroup	metlin	name	METLIN_MSMS	usernotes
1	1	Ile Ile Pro Val	162536	-	Peptides	2.13188	1.09212	12.6617	0.000404217	0.0721592	UP	441.307	441.306	441.309	30.9502	30.8755	31.121	6984.48	286878	36215.9	611590	25718.5			3		M441T31	y
2	66	PA(15:0/20:3(8Z,11Z,14Z))	81317	-	Glycerophospholipids	12.4817	-3.64174	-10.3906	0.00181563	0.0960139	DOWN	685.435	685.435	685.435	25.394	25.392	25.6323	1236.95	159296	11412.3	12497.6	21646.4			23		M685T25	y
3	1	C17 Sphinganine	41558	-	Sphingolipids	3.01297	-1.59119	-7.72395	0.00181584	0.096015	DOWN	288.29	288.29	288.29	28.797	28.6255	28.8587	133980	1.47173e+07	1.71883e+06	4.88465e+06	1.38104e+06	[14][M]+		5		M288T29	y
4	-	Unknown	-	-	-	6.44299	-2.68773	-6.98118	0.00238841	0.0982446	DOWN	652.553	652.553	652.554	31.2111	31.1962	31.226	2480.3	233501	32043.8	36108.7	37035.3			3		M653T31	n
5	-	Unknown	-	-	-	2.13113	-1.09162	-8.20238	0.00278058	0.0992757	DOWN	145.084	145.084	145.084	28.7112	28.6255	28.797	31360.8	3.50578e+06	200787	1.64503e+06	337747	[4][M+1]+		5		M145T29	n
6	32	Isofucosterol glucoside	86475	-	Steroids and steroid derivatives	2.06684	1.04743	5.33705	0.00604241	0.141187	UP	575.412	575.412	575.414	28.1478	27.991	28.169	7036.19	323401	82248.4	668420	75977			6		M575T28	y
7	-	Unknown	-	-	-	12.597	3.65501	8.15963	0.00692982	0.148008	UP	551.632	551.632	551.632	23.3343	23.2907	23.378	1656.55	10483.9	9089.41	133734	24532.7			13		M552T23	n
8	50	Ecalcidene	42607	-	Steroids and steroid derivatives	2.18859	-1.13	-6.10442	0.00910335	0.160625	DOWN	456.37	456.37	456.37	28.6447	28.6255	28.664	3443.76	303645	41710.4	138740	21201.8			5		M456T29	y
9	30	Palmitic acid(d3)	96756	-	Steroids and steroid derivatives	2.1503	-1.10454	-4.88643	0.0100355	0.164784	DOWN	260.259	260.258	260.259	28.8228	28.664	28.8587	16441.7	1.47602e+06	225308	686425	166041			5		M260T29	y
10	-	Unknown	-	-	-	2.67541	-1.41976	-4.56667	0.0108867	0.168108	DOWN	289.293	289.293	289.293	28.664	28.6255	28.8587	25287.6	2.57174e+06	464532	961252	396635	[14][M+1]+		5		M289T29	n
11	-	Unknown	-	-	-	4.13513	2.04793	4.81157	0.0112778	0.169506	UP	551.632	551.632	551.632	28.822	28.7853	28.8587	2350.25	44059.8	40910.3	182741	28610.2			5		M552T29	n
12	1	quinaldine	96204	-	Quinolines and derivatives	2.0238	-1.01707	-5.13179	0.0114295	0.170029	DOWN	144.081	144.081	144.081	28.6447	28.6255	28.664	271105	2.94022e+07	4.29877e+06	1.45282e+07	2.59286e+06	[4][M]+		5		M144T29	y
13	3	Convicine	66969	C08430	Organic oxygen compounds	6.1199	2.61351	4.32777	0.0132524	0.179048	UP	306.092	306.091	306.093	7.20817	7.15417	7.26217	6369.56	28933.6	38192.9	177881	45769.2			34		M306T7	y
14	-	Unknown	-	-	-	1.74029	0.799332	5.16575	0.0152734	0.187291	UP	356.285	356.285	356.286	21.9168	21.8088	22.1063	4019.87	165417	18007.7	287873	36899.6	[17][M+1]+		18		M356T22	n
15	34	1α-hydroxy-2β-(3-hydroxypropoxy) vitamin D3 / 1α-hydroxy-2β-(3-hydroxypropoxy)cholecalciferol	42397	-	Steroids and steroid derivatives	2.20036	1.13774	4.56495	0.0181656	0.196747	UP	475.394	475.394	475.395	30.9128	30.8755	30.9502	5043.1	314703	69254.8	692460	125488			3		M475T31	y
16	2	8-Isoquinoline methanamine (hydrochloride)	45036	-	Unknown	1.50203	-0.586913	-5.53339	0.0209659	0.204012	DOWN	158.096	158.096	158.096	28.6447	28.6255	28.664	293145	2.3635e+07	726329	1.57354e+07	2.36365e+06	[8][M]+		5		M158T29	y
17	2	Carbazole	66794	C08060	Unknown	1.73165	-0.792145	-4.45311	0.0257443	0.213505	DOWN	168.081	168.08	168.081	28.7434	28.664	28.8228	9833.49	867523	130832	500981	56644.2			5		M168T29	y
18	-	Unknown	-	-	-	1.78462	0.835621	4.27368	0.0274834	0.216299	UP	459.363	459.363	459.364	30.9128	30.8755	30.9502	3305.73	248086	32299.5	442741	71975.2	[19][M+2]+		3		M459T31	n
19	17	TG(12:0/12:0/15:1(9Z))[iso3]	98490	-	Glycerolipids	1.96524	0.974706	3.88515	0.0279909	0.217061	UP	679.576	679.576	679.576	31.6835	31.5978	31.7692	6120.86	370285	77475.3	727699	139236			4		M680T32	y
20	77	2,6-nonadienal	36566	-	Organic oxygen compounds	3.72718	1.89809	3.27225	0.0317711	0.222106	UP	139.122	139.122	139.123	25.8472	25.8355	25.8588	701.712	33342.7	36529.4	124274	31340.7			16		M139T26	y
21	1	Dextroamphetamine	1960	C07884	Benzene and substituted derivatives	51.9139	-5.69805	-5.28502	0.0327848	0.223294	DOWN	136.112	136.112	136.112	25.9049	25.904	25.9058	2169.6	119946	38476.3	2045.67	3543.2			16		M136T26	y
22	-	Unknown	-	-	-	8.78716	-3.1354	-4.19532	0.0365229	0.227193	DOWN	118.122	118.122	118.122	28.664	28.6255	28.8897	11992	1.04896e+06	363815	119374	122172			5		M118T29	y
23	6	15(R)-15-methyl Prostaglandin A2	45405	-	Fatty Acyls	3.87372	1.95372	3.12531	0.0385334	0.229023	UP	349.235	349.235	349.235	20.2097	20.2035	20.2187	259737	2.22549e+06	2.80838e+06	8.62094e+06	2.16228e+06			7		M349T20_1	y
24	1	Sempervirine	67546	C09240	Alkaloids	2.22211	1.15193	3.25017	0.0386609	0.229134	UP	273.139	273.139	273.139	30.2707	30.2548	30.2867	24026.4	1.91442e+06	1.04092e+06	4.25406e+06	686317			12		M273T30	y
25	17	N-palmitoyl tryptophan	75477	-	Organic acids and derivatives	1.63891	0.712735	3.7268	0.0388494	0.229296	UP	443.334	443.334	443.334	21.9052	21.8088	22.1063	36073.7	847339	230055	1.38871e+06	101881			18		M443T22_1	y
26	6	15(R)-15-methyl Prostaglandin A2	45405	-	Fatty Acyls	4.06582	2.02355	4.76459	0.0412432	0.231246	UP	349.235	349.235	349.235	28.1478	27.991	28.169	28241.2	864460	23380.7	3.51474e+06	963159			6		M349T28	y
28	0	Acetylisoniazid	850	C07585	Pyridines and derivatives	1.89744	0.924054	3.49754	0.043799	0.233124	UP	180.08	180.08	180.081	31.6835	31.5978	31.7692	88740.1	5.72454e+06	1.06337e+06	1.0862e+07	2.31127e+06			4		M180T32	y
29	1	Hexylamine	66899	C08306	Organic nitrogen compounds	2.79279	-1.48171	-3.41542	0.0443599	0.233511	DOWN	102.128	102.128	102.128	28.8099	28.797	28.8228	102584	1.17427e+07	3.4389e+06	4.20463e+06	1.66953e+06			5		M102T29	y
30	-	Unknown	-	-	-	10.2754	3.36112	3.57206	0.0454348	0.234229	UP	542.444	542.444	542.445	31.1508	31.121	31.1807	3226.39	27058.2	46866.1	280754	113737			3		M542T31	y
31	2	α-Erythroidine	3403	C06531	Unknown	1.89096	0.919118	2.81061	0.0482936	0.236002	UP	274.144	274.144	274.145	30.2548	30.086	30.2867	11885.5	829937	324004	1.56938e+06	320419			12		M274T30	y
