# Supplementary material for: Enhancing Genome-Scale Model by Integrative Exometabolome and Transcriptome: Unveiling Carbon Assimilation towards Sphingolipid Biosynthetic Capability of Cordyceps militaris
Source: J Fungi (Basel). 2022 Aug 22;8(8):887. doi: 10.3390/jof8080887 (PMC9409897; doi:10.3390/jof8080887)
Supplement: Supplementary file 1 [file jof-08-00887-s001.zip › Supplementary File S3.xlsx]

## Sheet: Index
Supplementary Information
Enhancing Genome-Scale Model by Integrative Exometabolome and Transcriptome: Unveiling Carbon Assimilation towards Sphingolipid Biosynthetic Capability of Cordyceps militaris
Pattsarun Cheawchanlertfa 1,†, Suwalak Chitcharoen 1,2,†, Nachon Raethong 3, Qing Liu 4, Pramote Chumnanpuen 1,5, Panyawarin Soommat 1,6, Yuanda Song 1,4, Mattheos Koffas 7, Kobkul Laoteng 8,*, Wanwipa Vongsangnak 1,5,*
1 Department of Zoology, Faculty of Science, Kasetsart University, Bangkok 10900, Thailand 2 Program in Bioinformatics and Computational Biology, Graduate School, Chulalongkorn University, Bangkok 10330, Thailand 3 Institute of Nutrition, Mahidol University, Nakhon Pathom 73170, Thailand 4 Colin Ratledge Center for Microbial Lipids, School of Agriculture Engineering and Food Sciences, Shandong Un…
Supplementary File S3: Overview of DAMs commonly or specifically accumulated in each pairwise comparison of the cultures using different carbon sources
This file includes Supplementary Table S1 to S3
	Supplementary Table S1. Overview of differential metabolites commonly produced in both xylose vs glucose and sucrose vs glucose
	Supplementary Table S2. Overview of differential metabolites specifically produced in xylose vs glucose
	Supplementary Table S3. Overview of differential metabolites specifically produced in sucrose vs glucose

## Sheet: Table S1
Supplementary Table S1: Overview of differential metabolites commonly produced in both xylose vs glucose and sucrose vs glucose
METLIN ID	Putative metabolites	Class	Xylose vs Glucose		Sucrose vs Glucose
			Featureidx	Log2 (FC)	Featureidx	Log2 (FC)
3717	Heptadecanoyl Ethanolamide_1	Organic nitrogen compounds	46	1.02225	100	1.40632
3717	Heptadecanoyl Ethanolamide_2	Organic nitrogen compounds	148	6.28104	102	6.0612
3717	Heptadecanoyl Ethanolamide_3	Organic nitrogen compounds	149	4.08473	125	2.50636
3717	Heptadecanoyl Ethanolamide_4	Organic nitrogen compounds	185	9.60908	132	8.34664
34726	2-lauroleic acid	Fatty Acyls	155	3.67439	115	8.74912
34856	Aleprylic acid	Fatty Acyls	161	1.13089	87	1.63941
34909	3E,5E-tridecadienoic acid	Fatty Acyls	69	1.37668	105	1.64539
36062	(9R,13R)-1a,1b-dihomo-jasmonic acid	Fatty Acyls	247	3.14242	186	5.11343
41556	C16 Sphinganine	Sphingolipids	137	10.1631	95	12.4966
41557	D-erythro-Sphingosine (Sphingosine)	Sphingolipids	178	11.043	124	8.17209
479551	(2S,3R)-2-aminoheptadecane-1,3-diol	Sphingolipids	2	3.98492	61	1.92829
479551	(2S,3R)-2-aminoheptadecane-1,3-diol	Sphingolipids	96	14.0989	60	12.7743
43849	Coumarinic acid methyl ether	Cinnamic acids and derivatives	156	2.53273	97	3.16454
58177	Phosphoroselenoic acid	Inorganic compounds	212	1.96472	37	3.15137
94392	3-Oxooctanoic acid glycerides	Organic compounds	246	2.16465	48	4.89937
98495	TG(12:0/12:0/17:2(9Z,12Z))[iso3] (Triacylglycerol)	Glycerolipids	23	4.34912	63	2.93267
269208	3-Methylbenzoic acid	Benzene and substituted derivatives	175	1.57667	131	1.75662
275410	Pelargonic acid morpholide	Fatty Acyls	158	3.7923	107	5.05225
289881	Dodecanoic acid, ammonium salt	Fatty Acyls	166	4.20371	113	5.76811
297165	Phytosphingosine	Sphingolipids	201	12.7215	144	12.2995
307388	Benzensulfonate_1	Benzene and substituted derivatives	68	8.94635	10	3.36282
307388	Benzensulfonate_2	Benzene and substituted derivatives	37	11.0317	20	7.68992
307388	Benzensulfonate_3	Benzene and substituted derivatives	42	7.21129	21	5.79029
334712	3,4-Dihydro-3-thioxo-1,2,4-triazin-5(2H)-one_1	Unknown	101	10.3509	66	10.786
334712	3,4-Dihydro-3-thioxo-1,2,4-triazin-5(2H)-one_2	Unknown	115	10.5826	74	11.0177
337155	1,1-Propanediol, 2,2,3,3,3-pentafluoro-	Organic oxygen compounds	58	3.25484	14	5.04723
387543	Methanol, (4,6-bis(bis(butoxymethyl)amino)-s-triazin-2-ylimino)di-	Unknown	145	-1.35688	158	2.46248
426722	Guanine, 8-(p-nitrophenyl)_1	Nucleosides	4	1.45331	28	1.46089
426722	Guanine, 8-(p-nitrophenyl)_2	Nucleosides	12	1.35384	98	1.07656
520164	Ammonium pentadecanoate_1	Fatty Acyls	84	8.91426	50	7.92753
520164	Ammonium pentadecanoate_2	Fatty Acyls	106	7.58807	72	7.52803
607939	Adenosine, 2-amino-3'-deoxy-	Nucleosides	228	1.14025	189	0.96563
714549	2-Amino-8-bromoadenosine	Nucleosides	61	2.34561	2	2.39157
896580	Oxaziridine-2-sulfonic acid_1	Organic acids and derivatives	14	8.35195	7	8.02882
896580	Oxaziridine-2-sulfonic acid_2	Organic acids and derivatives	86	8.60991	53	10.0181
896580	Oxaziridine-2-sulfonic acid_3	Organic acids and derivatives	90	8.64917	56	10.3344
915537	2,2-Dichloroethane-1-peroxol_1	Organohalogen compounds	32	6.55976	18	8.58809
915537	2,2-Dichloroethane-1-peroxol_2	Organohalogen compounds	47	6.00569	25	7.32895
915537	2,2-Dichloroethane-1-peroxol_3	Organohalogen compounds	154	6.87041	104	6.51565

## Sheet: Table S2
Supplementary Table S2. Overview of differential metabolites specifically produced in xylose vs glucose
Featureidx	METLIN ID	Putative metabolites	Class	Log2(FC)_Xylose vs Glucose
72	3885	PA(17:0/14:1(9Z)) (Phosphatidic acid)	Glycerophospholipids	-1.23161
102	5754	Orotidine_1	Nucleosides	2.22753
117	5754	Orotidine_2	Nucleosides	2.11515
220	83707	Ceramide (Cer(d18:1/20:0))	Sphingolipids	1.11216
48	294361	Urea, 1,1'-ethylenebis(3-(2-chloroethyl)-1-nitroso-	Unknown	1.66418
67	298428	Methyl jasmonate	Fatty Acyls	1.98387
82	308397	N-Isobutyl decanamide	Fatty Acyls	1.18693
8	330779	Carbocyclic-3'-amino-adenosine	Nucleosides	1.72323
6	331850	Monoethanolamine myristate	Organic nitrogen compounds	4.06972
183	333785	1,3,5-Triazine-2,4,6-triamine, N,N-di-2-propenyl-	Unknown	1.31828
27	347542	2-Propenoic acid, 3-[3-(trifluoromethyl)phenyl]-, butyl ester, (2E)-	Fatty Acyls	1.74673
126	355016	Decanoic acid, 1,2-ethanediylbis(oxy-2,1-ethanediyl) ester	Fatty Acyls	-0.793704
18	358553	Benzenesulfonic acid, 4-methyl-, compd. with N,N-diethylethanamine (1:1)	Benzene and substituted derivatives	-1.6735
87	358999	Dilauryl tartrate	Organic acids and derivatives	-2.40167
3	365214	1,3,5-Triazine-2,4-diamine, N,N,N',N'-tetramethyl-6-nitro-	Unknown	9.39463
25	378242	Benzenesulfonic acid, 2-[[[3-[[8-[[(2-ethoxyethoxy)carbonyl]amino]-2-hydroxy-1-naphthalenyl]azo]-4-hydroxyphenyl]sulfonyl]amino]-	Benzene and substituted derivatives	-3.23512
136	387748	Benzoic acid, 4-amino-2-(benzyloxy)-, 3-piperidinopropyl ester, hydrogen phosphate	Benzene and substituted derivatives	7.70791
95	392490	Succinic acid, tert-butyl ester, sodium salt	Organic acids and derivatives	3.57311
1	421614	Adenosine, 2',3'-dideoxy-2'-(1-pyrrolidinyl)-	Nucleosides	2.38119
251	445102	Sodium cyclohexyl succinate	Fatty Acyls	2.88145
52	462270	(R)-(+)-1,1,1-Trifluoro-2-octanol	Fatty Acyls	-2.20505
210	552555	2-(octadecylsulfanyl)naphthalene	Prenol lipids	-1.28694
7	616838	n-adenosylaziridine_1	Nucleosides	4.43063
237	616838	n-adenosylaziridine_2	Nucleosides	3.92944
114	895063	1-{3-[(Diethoxymethyl)silyl]propyl}pyrrolidine-2,5-dione	Unknown	-1.10093
229	912587	2,6-Bis[(dec-4-en-1-yl)oxy]anthracene	Unknown	-0.712369

## Sheet: Table S3
Supplementary Table S3. Overview of differential metabolites specifically produced in sucrose vs glucose
Featureidx	METLIN ID	Putative metabolites	Class	Log2(FC)_Sucrose vs Glucose
51	484	Phosphohydroxypyruvic acid	Organic oxygen compounds	2.34763
119	45618	17,20-dimethyl Prostaglandin F1α	Fatty Acyls	2.69632
180	45935	Ceriporic acid A	Fatty Acyls	1.36227
123	64088	Discadenine	Nucleosides	0.877359
69	71227	Fructoselysine	Organic acids and derivatives	4.04507
83	71286	Mannopine_1	Organic compounds	3.55028
169	71286	Mannopine_2	Organic compounds	2.03387
12	268173	2,4,5-Trimethylaniline	Benzene and substituted derivatives	1.81813
139	346254	1-Aminocycloundecane-1-carboxylic acid	Organic compounds	0.930987
52	400370	L-Lysine mono(3-methyl-2-oxobutyrate)	Organic acids and derivatives	0.807197
135	401071	2,6-Diaminopurine 2',3'-dideoxyriboside	Nucleosides	1.69342
177	459733	Piperidine, 1-(3-(triethylsilyl)propyl)-, hydrochloride	Organic compounds	0.748395
68	588429	Adenosine, 3'-amino-3'-deoxy-2'-O-methyl-	Nucleosides	2.46453
89	594895	1-O-Hexadecyl-2-desoxy-2-amino-sn-glycerol	Glycerolipids	1.40896
