# Supplementary material for: Enhancing Genome-Scale Model by Integrative Exometabolome and Transcriptome: Unveiling Carbon Assimilation towards Sphingolipid Biosynthetic Capability of Cordyceps militaris
Source: J Fungi (Basel). 2022 Aug 22;8(8):887. doi: 10.3390/jof8080887 (PMC9409897; doi:10.3390/jof8080887)
Supplement: Supplementary file 1 [file jof-08-00887-s001.zip › Supplementary File S4.xlsx]

## Sheet: Index
Supplementary Information
Enhancing Genome-Scale Model by Integrative Exometabolome and Transcriptome: Unveiling Carbon Assimilation towards Sphingolipid Biosynthetic Capability of Cordyceps militaris
Pattsarun Cheawchanlertfa 1,†, Suwalak Chitcharoen 1,2,†, Nachon Raethong 3, Qing Liu 4, Pramote Chumnanpuen 1,5, Panyawarin Soommat 1,6, Yuanda Song 1,4, Mattheos Koffas 7, Kobkul Laoteng 8,*, Wanwipa Vongsangnak 1,5,*
1 Department of Zoology, Faculty of Science, Kasetsart University, Bangkok 10900, Thailand 2 Program in Bioinformatics and Computational Biology, Graduate School, Chulalongkorn University, Bangkok 10330, Thailand 3 Institute of Nutrition, Mahidol University, Nakhon Pathom 73170, Thailand 4 Colin Ratledge Center for Microbial Lipids, School of Agriculture Engineering and Food Sciences, Shandong Un…
Supplementary File S4: List of the newly-identified metabolites in the enhanced GSMM, iPC1469.
This file includes Supplementary Table S1.
	Supplementary Table S1. List of the newly-identified metabolites in the enhanced GSMM, iPC1469.

## Sheet: Table S1
Supplementary Table S1. List of the newly-identified metabolites in the enhanced GSMM, iPC1469.
NO.	NAME	IUPAC NAME	SYNONYM	FORMULA	MASS	CHARGE	SMILES	INCHI	INCHIKEY	CHEBI ID
1	Carbocyclic-3'-amino-adenosine	(1R,2R,3S,5R)-2-amino-5-(6-aminopurin-9-yl)-3-(hydroxymethyl)cyclopentan-1-ol		C11H16N6O2	264.28	0	C1C(C(C(C1N2C=NC3=C(N=CN=C32)N)O)N)CO	1S/C11H16N6O2/c12-7-5(2-18)1-6(9(7)19)17-4-16-8-10(13)14-3-15-11(8)17/h3-7,9,18-19H,1-2,12H2,(H2,13,14,15)/t5-,6-,7-,9+/m1/s1	WYMIIYMQKKFLES-PULFBKJNSA-N
2	8-Bromoadenosine	(2R,3R,4S,5R)-2-(6-amino-8-bromopurin-9-yl)-5-(hydroxymethyl)oxolane-3,4-diol	2-Amino-8-bromoadenosine	C10H12BrN5O4	346.14	0	C1=NC(=C2C(=N1)N(C(=N2)Br)C3C(C(C(O3)CO)O)O)N	1S/C10H12BrN5O4/c11-10-15-4-7(12)13-2-14-8(4)16(10)9-6(19)5(18)3(1-17)20-9/h2-3,5-6,9,17-19H,1H2,(H2,12,13,14)/t3-,5-,6-,9-/m1/s1	VJUPMOPLUQHMLE-UUOKFMHZSA-N
3	n-adenosylaziridine	(2R,3R,4S,5R)-2-(6-amino-9H-purin-9-yl)-5-(aziridin-1-ylmethyl)oxolane-3,4-diol		C12H16N6O3	292.294	0	Nc1ncnc2n(cnc12)C4OC(CN3CC3)C(O)C4O	1S/C12H16N6O3/c13-10-7-11(15-4-14-10)18(5-16-7)12-9(20)8(19)6(21-12)3-17-1-2-17/h4-6,8-9,12,19-20H,1-3H2,(H2,13,14,15)/t6-,8-,9-,12-/m1/s1	ZUBRQACMPQRWEV-WOUKDFQISA-N
4	Adenosine, 2-amino-3'-deoxy-3'-fluoro-	(2R,3S,4S,5R)-2-(2,6-diaminopurin-9-yl)-4-fluoro-5-(hydroxymethyl)oxolan-3-ol	2-amino-adenosine	C10H13FN6O3	284.25	0	C1=NC2=C(N=C(N=C2N1C3C(C(C(O3)CO)F)O)N)N	1S/C10H13FN6O3/c11-4-3(1-18)20-9(6(4)19)17-2-14-5-7(12)15-10(13)16-8(5)17/h2-4,6,9,18-19H,1H2,(H4,12,13,15,16)/t3-,4-,6-,9-/m1/s1	BBWXIJICDDYYJZ-DXTOWSMRSA-N
5	(R)-(+)-1,1,1-Trifluoro-2-octanol	(2R)-1,1,1-trifluorooctan-2-ol		C8H15F3O	184.2	0	CCCCCCC(C(F)(F)F)O	1S/C8H15F3O/c1-2-3-4-5-6-7(12)8(9,10)11/h7,12H,2-6H2,1H3/t7-/m1/s1	INAIBHXNHIEDAM-SSDOTTSWSA-N
6	NeuAcalpha2-3Galbeta-Cer(d18:1/20:0)	(2S,5R)-5-acetamido-2-[(2R,4S,5S)-3,5-dihydroxy-2-[(E,2S,3R)-3-hydroxy-2-(icosanoylamino)octadec-4-enoxy]-6-(hydroxymethyl)oxan-4-yl]oxy-4-hydroxy-6-[(1R,2R)-1,2,3-trihydroxypropyl]oxane-2-carboxylic acid		C55H102N2O16	1047.42	0	O1C([C@H](NC(=O)C)C(O)C[C@]1(O[C@H]2[C@@H](O)C(O[C@@H](OC[C@H](NC(=O)CCCCCCCCCCCCCCCCCCC)[C@H](O)/C=C/CCCCCCCCCCCCC)C2O)CO)C(O)=O)[C@H](O)[C@H](O)CO	1S/C55H102N2O16/c1-4-6-8-10-12-14-16-18-19-20-21-23-25-27-29-31-33-35-46(64)57-41(42(61)34-32-30-28-26-24-22-17-15-13-11-9-7-5-2)39-70-53-50(67)52(49(66)45(38-59)71-53)73-55(54(68)69)36-43(62)47(56-40(3)60)51(72-55)48(65)44(63)37-58/h32,34,41-45,47-53,58-59,61-63,65-67H,4-31,33,35-39H2,1-3H3,(H,56,60)(H,57,64)(H,68,69)/b34-32+/t41-,42+,43?,44+,45?,47+,48+,49-,50?,51?,52-,53+,55-/m0/s1	ZHNKBYJDADPECR-HNWZEYSJSA-N	CHEBI:184228
7	L-Lysine mono(3-methyl-2-oxobutyrate)	(2S)-2,6-diaminohexanoic acid;3-methyl-2-oxobutanoic acid	Lysine alpha-ketoisovalerate	C11H22N2O5	262.3	0	CC(C)C(=O)C(=O)O.C(CCN)CC(C(=O)O)N	1S/C6H14N2O2.C5H8O3/c7-4-2-1-3-5(8)6(9)10;1-3(2)4(6)5(7)8/h5H,1-4,7-8H2,(H,9,10);3H,1-2H3,(H,7,8)/t5-;/m0./s1	VRFAQQYAKWMFLR-JEDNCBNOSA-N
8	3Z,5E-tridecadienoic acid	(3Z,5E)-trideca-3,5-dienoic acid		C13H22O2	210.317	0	OC(=O)C/C=C\C=C\CCCCCCC	1S/C13H22O2/c1-2-3-4-5-6-7-8-9-10-11-12-13(14)15/h8-11H,2-7,12H2,1H3,(H,14,15)/b9-8+,11-10-	PTYZGNZCLHAQEB-OCBXPSTGSA-N	CHEBI:185360
9	cis-9-dodecenoic acid	(9Z)-dodec-9-enoic acid	lauroleic acid; Dodec-9c-ensaeure; dodec-9c-enoic acid; cis-dodec-9-enoic acid; C12:1, n-3 cis; 9Z-Dodecensaeure; 9Z-dodecenoic acid; 12:1, n-3 cis; (Z)-dodec-9-enoic acid; (Z)-9-dodecenoic acid	C12H22O2	198.302	0	CC\C=C/CCCCCCCC(O)=O	1S/C12H22O2/c1-2-3-4-5-6-7-8-9-10-11-12(13)14/h3-4H,2,5-11H2,1H3,(H,13,14)/b4-3-	FKLSONDBCYHMOQ-ARJAWSKDSA-N	CHEBI:38377
10	cis-2-Methoxycinnamic acid	(Z)-3-(2-methoxyphenyl)prop-2-enoic acid	COUMARINIC ACID METHYL ETHER	C10H10O3	178.18	0	COC1=CC=CC=C1C=CC(=O)O	1S/C10H10O3/c1-13-9-5-3-2-4-8(9)6-7-10(11)12/h2-7H,1H3,(H,11,12)/b7-6-	FEGVSPGUHMGGBO-SREVYHEPSA-N
11	PA(17:0/14:1(9Z))	[(2R)-3-phosphonooxy-2-[(Z)-tetradec-9-enoyl]oxypropyl] heptadecanoate	1-heptadecanoyl-2-(9Z-tetradecenoyl)-sn-glycero-3-phosphate	C34H65O8P	632.8	0	CCCCCCCCCCCCCCCCC(=O)OCC(COP(=O)(O)O)OC(=O)CCCCCCCC=CCCCC	1S/C34H65O8P/c1-3-5-7-9-11-13-15-16-17-19-20-22-24-26-28-33(35)40-30-32(31-41-43(37,38)39)42-34(36)29-27-25-23-21-18-14-12-10-8-6-4-2/h10,12,32H,3-9,11,13-31H2,1-2H3,(H2,37,38,39)/b12-10-/t32-/m1/s1	DJHNLGNMTIWMHE-PGKKXZESSA-N
12	2,6-Diaminopurine 2',3'-dideoxyriboside	[(2S,5R)-5-(2,6-diaminopurin-9-yl)oxolan-2-yl]methanol	2,6-Diaminopurine 2',3'-dideoxyriboside; 2-Amino-2',3'-dideoxyadenosine	C10H14N6O2	250.26	0	C1CC(OC1CO)N2C=NC3=C(N=C(N=C32)N)N	1S/C10H14N6O2/c11-8-7-9(15-10(12)14-8)16(4-13-7)6-2-1-5(3-17)18-6/h4-6,17H,1-3H2,(H4,11,12,14,15)/t5-,6+/m0/s1	OABUIHOVHQHUAO-NTSWFWBYSA-N
13	Methanol, (4,6-bis(bis(butoxymethyl)amino)-s-triazin-2-ylimino)di-	[[4,6-bis[bis(butoxymethyl)amino]-1,3,5-triazin-2-yl]-(hydroxymethyl)amino]methanol		C25H50N6O6	530.7	0	CCCCOCN(COCCCC)C1=NC(=NC(=N1)N(CO)CO)N(COCCCC)COCCCC	1S/C25H50N6O6/c1-5-9-13-34-19-30(20-35-14-10-6-2)24-26-23(29(17-32)18-33)27-25(28-24)31(21-36-15-11-7-3)22-37-16-12-8-4/h32-33H,5-22H2,1-4H3	VTUAPWNTTCBHIA-UHFFFAOYSA-N
14	Piperidine, 1-(3-(triethylsilyl)propyl)-, hydrochloride	1-(3-chloropropyl)piperidine;hydrochloride	1-(3-Chloropropyl)piperidine hydrochloride	C8H17Cl2N	198.13	0	C1CCN(CC1)CCCCl.Cl	1S/C8H16ClN.ClH/c9-5-4-8-10-6-2-1-3-7-10;/h1-8H2;1H	OBOBUDMMFXRNDO-UHFFFAOYSA-N
15	fructosyllysine(1+)	1-{[(5S)-5-azaniumyl-5-carboxylatopentyl]azaniumyl}-1-deoxy-D-fructose	N(6)-(D-fructosyl)-L-lysine; fructosyllysine cation; fructoselysine(1+); fructose lysine(1+); D-fructosyl-L-lysine(1+)	C12H25N2O7	309.336	1	[NH3+][C@@H](CCCC[NH2+]CC(=O)[C@@H](O)[C@H](O)[C@H](O)CO)C([O-])=O	1S/C12H24N2O7/c13-7(12(20)21)3-1-2-4-14-5-8(16)10(18)11(19)9(17)6-15/h7,9-11,14-15,17-19H,1-6,13H2,(H,20,21)/p+1/t7-,9+,10+,11+/m0/s1	BFSYFTQDGRDJNV-AYHFEMFVSA-O	CHEBI:61393
16	1-{3-[(Diethoxymethyl)silyl]propyl}pyrrolidine-2,5-dione	1-{3-[(Diethoxymethyl)silyl]propyl}pyrrolidine-2,5-dione		C12H23NO4Si	273.404	0	CCOC(OCC)[SiH2]CCCN1C(=O)CCC1=O	1S/C12H23NO4Si/c1-3-16-12(17-4-2)18-9-5-8-13-10(14)6-7-11(13)15/h12H,3-9,18H2,1-2H3	WUQDRMZYBWXVOU-UHFFFAOYSA-N
17	1-Aminocyclohexanecarboxylic acid	1-Aminocycloundecane-1-carboxylic acid	Homocycloleucine	C7H13NO2	143.18	0	C1CCC(CC1)(C(=O)O)N	1S/C7H13NO2/c8-7(6(9)10)4-2-1-3-5-7/h1-5,8H2,(H,9,10)	WOXWUZCRWJWTRT-UHFFFAOYSA-N
18	2,2-Dichloroethane-1-peroxol	1,1-dichloro-2-hydroperoxyethane		C2H4Cl2O2	130.95	0	C(C(Cl)Cl)OO	1S/C2H4Cl2O2/c3-2(4)1-6-5/h2,5H,1H2	GJBKLBBJOKITMY-UHFFFAOYSA-N
19	melamine cyanurate	1,3,5-triazinane-2,4,6-trione--1,3,5-triazine-2,4,6-triamine (1/1)	s-Triazine, 2,4,6-triamino-, compd. with s-triazine-triol; melamine-cyanuric acid complex; Melamine-cyanuric acid compd; melamine-cyanuric acid adduct; Melamine isocyanurate; 1,3,5-Triazine-2,4,6(1H,3H,5H)-trione, compound with 1,3,5-triazine-2,4,6-triamine (1:1); 1,3,5-Triazine-2,4,6(1H,3H,5H)-trione, compd. with 1,3,5-triazine-2,4,6-triamine (1:1)	C6H9N9O3	255.194	0				CHEBI:60153
20	Decanoic acid, 1,2-ethanediylbis(oxy-2,1-ethanediyl) ester	2-[2-(2-decanoyloxyethoxy)ethoxy]ethyl decanoate	Triethylene glycol dicaprate; Didecanoyltriethylene glycol ester	C26H50O6	458.7	0	CCCCCCCCCC(=O)OCCOCCOCCOC(=O)CCCCCCCCC	1S/C26H50O6/c1-3-5-7-9-11-13-15-17-25(27)31-23-21-29-19-20-30-22-24-32-26(28)18-16-14-12-10-8-6-4-2/h3-24H2,1-2H3	KCNIYOMOUYURBQ-UHFFFAOYSA-N
21	Monoethanolamine myristate	2-aminoethanol;tetradecanoic acid		C16H35NO3	289.45	0	CCCCCCCCCCCCCC(=O)O.C(CO)N	1S/C14H28O2.C2H7NO/c1-2-3-4-5-6-7-8-9-10-11-12-13-14(15)16;3-1-2-4/h2-13H2,1H3,(H,15,16);4H,1-3H2	KPYDHOVAALYKRO-UHFFFAOYSA-N
22	Diallylmelamine	2-N,2-N-bis(prop-2-enyl)-1,3,5-triazine-2,4,6-triamine	1,3,5-Triazine-2,4,6-triamine, N,N-di-2-propenyl-	C9H14N6	206.25	0	C=CCN(CC=C)C1=NC(=NC(=N1)N)N	1S/C9H14N6/c1-3-5-15(6-4-2)9-13-7(10)12-8(11)14-9/h3-4H,1-2,5-6H2,(H4,10,11,12,13,14)	ROHTVIURAJBDES-UHFFFAOYSA-N
23	1,3,5-Triazine-2,4-diamine, N,N,N',N'-tetramethyl-6-nitro-	2-N,2-N,4-N,6-tetramethyl-1,3,5-triazine-2,4-diamine	N,N,N',6-tetramethyl-1,3,5-triazine-2,4-diamine	C7H13N5	167.21	0	CC1=NC(=NC(=N1)N(C)C)NC	1S/C7H13N5/c1-5-9-6(8-2)11-7(10-5)12(3)4/h1-4H3,(H,8,9,10,11)	PBQAILYQENPVNX-UHFFFAOYSA-N
24	1,1-Propanediol, 2,2,3,3,3-pentafluoro-	2,2,3,3,3-pentafluoropropan-1-ol	2,2,3,3,3-Pentafluoro-1-propanol	C3H3F5O	150.05	0	C(C(C(F)(F)F)(F)F)O	1S/C3H3F5O/c4-2(5,1-9)3(6,7)8/h9H,1H2	PSQZJKGXDGNDFP-UHFFFAOYSA-N
25	Urea, 1,1'-ethylenebis(3-(2-chloroethyl)-1-nitroso-	3-(2-chloroethyl)-1-[2-[2-chloroethylcarbamoyl(nitroso)amino]ethyl]-1-nitrosourea		C8H14Cl2N6O4	329.14	0	C(CCl)NC(=O)N(CCN(C(=O)NCCCl)N=O)N=O	1S/C8H14Cl2N6O4/c9-1-3-11-7(17)15(13-19)5-6-16(14-20)8(18)12-4-2-10/h1-6H2,(H,11,17)(H,12,18)	IPWAFNLCDXCKPR-UHFFFAOYSA-N
26	Benzoic acid, 4-amino-2-(benzyloxy)-, 3-piperidinopropyl ester, hydrogen phosphate	3-(diethylamino)propyl 4-amino-2-phenylmethoxybenzoate		C21H28N2O3	356.5	0	CCN(CC)CCCOC(=O)C1=C(C=C(C=C1)N)OCC2=CC=CC=C2	1S/C21H28N2O3/c1-3-23(4-2)13-8-14-25-21(24)19-12-11-18(22)15-20(19)26-16-17-9-6-5-7-10-17/h5-7,9-12,15H,3-4,8,13-14,16,22H2,1-2H3	OLFCANPWYBECRH-UHFFFAOYSA-N
27	m-toluic acid	3-methylbenzoic acid	meta-Toluic acid; m-Toluylic acid; m-Toluic Acid; beta-Methylbenzoic acid; beta-Bethylbenzoic acid; 3-toluic acid	C8H8O2	136.148	0	Cc1cccc(c1)C(O)=O	1S/C8H8O2/c1-6-3-2-4-7(5-6)8(9)10/h2-5H,1H3,(H,9,10)	GPSDUZXPYCFOSQ-UHFFFAOYSA-N	CHEBI:10589
28	3-oxooctanoic acid	3-oxooctanoic acid	beta-oxooctanoic acid; beta-oxocaprylic acid; beta-ketooctanoic acid; beta-ketocaprylic acid; 3-Ketooctanoic acid; 3-keto-n-caprylic acid	C8H14O3	158.195	0	CCCCCC(=O)CC(O)=O	1S/C8H14O3/c1-2-3-4-5-7(9)6-8(10)11/h2-6H2,1H3,(H,10,11)	FWNRRWJFOZIGQZ-UHFFFAOYSA-N	CHEBI:44680
29	3,4-Dihydro-3-thioxo-1,2,4-triazin-5(2H)-one	3-sulfanylidene-2H-1,2,4-triazin-5-one	3-Thioxo-3,4-dihydro-1,2,4-triazin-5(2H)-one	C3H3N3OS	129.14	0	C1=NNC(=S)NC1=O	1S/C3H3N3OS/c7-2-1-4-6-3(8)5-2/h1H,(H2,5,6,7,8)	HZPZCLDCTLLJTF-UHFFFAOYSA-N
30	Succinic acid, tert-butyl ester, sodium salt	4-[(2-methylpropan-2-yl)oxy]-4-oxobutanoic acid	mono-tert-Butyl succinate	C8H14O4	174.19	0	CC(C)(C)OC(=O)CCC(=O)O	1S/C8H14O4/c1-8(2,3)12-7(11)5-4-6(9)10/h4-5H2,1-3H3,(H,9,10)	PCOCFIOYWNCGBM-UHFFFAOYSA-N
31	17,20-dimethyl Prostaglandin F1α	7-[3,5-dihydroxy-2-[(E)-3-hydroxy-5-methylnon-1-enyl]cyclopentyl]heptanoic acid		C22H40O5	384.5	0	CCCCC(C)CC(C=CC1C(CC(C1CCCCCCC(=O)O)O)O)O	1S/C22H40O5/c1-3-4-9-16(2)14-17(23)12-13-19-18(20(24)15-21(19)25)10-7-5-6-8-11-22(26)27/h12-13,16-21,23-25H,3-11,14-15H2,1-2H3,(H,26,27)/b13-12+	GBYMYPWDCSUFAK-OUKQBFOZSA-N
32	Aleprylic acid	7-cyclopent-2-en-1-ylheptanoic acid		C12H20O2	196.29	0	OC(=O)CCCCCCC1CCC=C1	1S/C12H20O2/c13-12(14)10-4-2-1-3-7-11-8-5-6-9-11/h5,8,11H,1-4,6-7,9-10H2,(H,13,14)	GMYNCKRSFMEXPG-UHFFFAOYSA-N	CHEBI:187643
33	Dilauryl tartrate	didodecyl (2R,3R)-2,3-dihydroxybutanedioate		C28H54O6	486.7	0	CCCCCCCCCCCCOC(=O)C(C(C(=O)OCCCCCCCCCCCC)O)O	1S/C28H54O6/c1-3-5-7-9-11-13-15-17-19-21-23-33-27(31)25(29)26(30)28(32)34-24-22-20-18-16-14-12-10-8-6-4-2/h25-26,29-30H,3-24H2,1-2H3/t25-,26-/m1/s1	XDQOYCJMMFRBQS-CLJLJLNGSA-N
34	dodecanoic acid	dodecanoic acid	Vulvic acid; Undecane-1-carboxylic acid; N-dodecanoic acid; n-dodecanoic acid; Laurostearic acid; Laurinsaeure; Laurinsaeure; lauric acid; LAURIC ACID; Lauric acid; Duodecylic acid; Duodecyclic acid; Dodecylic acid; Dodecylcarboxylate; dodecoic acid; Dodecanoic acid; DAO; Coconut oil fatty acids; CH3-[CH2]10-COOH; C12:0; C12 fatty acid; ABL; 1-undecanecarboxylic acid	C12H24O2	200.318	0	CCCCCCCCCCCC(O)=O	1S/C12H24O2/c1-2-3-4-5-6-7-8-9-10-11-12(13)14/h2-11H2,1H3,(H,13,14)	POULHZVOKOAJMA-UHFFFAOYSA-N	CHEBI:30805
35	(-)-methyl jasmonate	methyl {(1R,2R)-3-oxo-2-[(2Z)-pent-2-en-1-yl]cyclopentyl}acetate	Methyl jasmonate; methyl (-)-jasmonate; methyl (-)-jasmonate; 3-oxo-2-(2-pentenyl)cyclopentaneacetic acid methyl ester; (-)-Methyl jasmonate	C13H20O3	224.296	0	CC\C=C/C[C@@H]1[C@@H](CC(=O)OC)CCC1=O	1S/C13H20O3/c1-3-4-5-6-11-10(7-8-12(11)14)9-13(15)16-2/h4-5,10-11H,3,6-9H2,1-2H3/b5-4-/t10-,11-/m1/s1	GEWDNTWNSAZUDX-WQMVXFAESA-N	CHEBI:15929
36	Heptadecanoyl Ethanolamide	N-(2-hydroxyethyl)heptadecanamide	Margaroyl-ethanolamine	C19H39NO2	313.5	0	CCCCCCCCCCCCCCCCC(=O)NCCO	1S/C19H39NO2/c1-2-3-4-5-6-7-8-9-10-11-12-13-14-15-16-19(22)20-17-18-21/h21H,2-18H2,1H3,(H,20,22)	GCCFMSAXQJECNH-UHFFFAOYSA-N
37	phytoceramide	N-[(2S,3S,4R)-1,3,4-trihydroxyoctadecan-2-yl]alkanamide		C19H38NO4R			CCCCCCCCCCCCCC[C@@H](O)[C@@H](O)[C@H](CO)NC([*])=O			CHEBI:31998
38	Benzenesulfonic acid, 4-methyl-, compd. with N,N-diethylethanamine (1:1)	N,N-diethylethanamine;4-methylbenzenesulfonic acid	riethylammonium p-toluenesulphonate	C13H23NO3S	273.39	0	CCN(CC)CC.CC1=CC=C(C=C1)S(=O)(=O)O	1S/C7H8O3S.C6H15N/c1-6-2-4-7(5-3-6)11(8,9)10;1-4-7(5-2)6-3/h2-5H,1H3,(H,8,9,10);4-6H2,1-3H3	MMVUZMIOJNPDME-UHFFFAOYSA-N
39	nonanoic acid	nonanoic acid	pergonic acid; Pelargonsaeure; Pelargonic acid; pelargon; pelargic acid; nonylic acid; nonoic acid; Nonansaeure; Nonanoic acid; Nonanoate; n-nonanoic acid; n-nonanoic acid; CH3-[CH2]7-COOH; 1-octanecarboxylic acid; 1-nonanoic acid	C9H18O2	158.238	0	CCCCCCCCC(O)=O	1S/C9H18O2/c1-2-3-4-5-6-7-8-9(10)11/h2-8H2,1H3,(H,10,11)	FBUKVWPVBMHYJY-UHFFFAOYSA-N	CHEBI:29019
40	Octadecyl naphthalene sulfonate	octadecyl naphthalene-1-sulfonate	2-(octadecylsulfanyl)naphthalene	C28H44O3S	460.7	0	CCCCCCCCCCCCCCCCCCOS(=O)(=O)C1=CC=CC2=CC=CC=C21	1S/C28H44O3S/c1-2-3-4-5-6-7-8-9-10-11-12-13-14-15-16-19-25-31-32(29,30)28-24-20-22-26-21-17-18-23-27(26)28/h17-18,20-24H,2-16,19,25H2,1H3	CCKVAPPZTDNQLO-UHFFFAOYSA-N
41	trilaurin	propane-1,2,3-triyl tridodecanoate	trilauroylglycerol; tridodecanoylglycerol; Tridodecanoyl glycerol; Tridodecanoin; TG(12:0/12:0/12:0); TG 12:0/12:0/12:0; propane-1,2,3-triyl trilaurate; Lauric acid triglycerin ester; Lauric acid triglycerin ester; Lauric acid triglyceride; Glyceryl trilaurate; Glyceryl tridodecanoate; Glycerol trilaurate; Glycerin trilaurate; Glycerin trilaurate; Dodecanoic acid 1,2,3-propanetriyl ester; 1,2,3-t…	C39H74O6	639.001	0	CCCCCCCCCCCC(=O)OCC(COC(=O)CCCCCCCCCCC)OC(=O)CCCCCCCCCCC	1S/C39H74O6/c1-4-7-10-13-16-19-22-25-28-31-37(40)43-34-36(45-39(42)33-30-27-24-21-18-15-12-9-6-3)35-44-38(41)32-29-26-23-20-17-14-11-8-5-2/h36H,4-35H2,1-3H3	VMPHSYLJUKZBJJ-UHFFFAOYSA-N	CHEBI:77389
42	Sodium cyclohexyl succinate	sodium;4-cyclohexyloxy-4-oxobutanoate		C10H15NaO4	222.087	0	C1CCC(CC1)OC(=O)CCC(=O)[O-].[Na+]	1S/C10H16O4.Na/c11-9(12)6-7-10(13)14-8-4-2-1-3-5-8;/h8H,1-7H2,(H,11,12);/q;+1/p-1	NOMPUOUIIHWRJU-UHFFFAOYSA-M
43	(9R,13R)-1a,1b-dihomo-jasmonic acid			C14H22O3	238.323	0	C(O)(=O)CCC[C@@H]1CCC([C@@H]1C/C=C\CC)=O	1S/C14H22O3/c1-2-3-4-7-12-11(9-10-13(12)15)6-5-8-14(16)17/h3-4,11-12H,2,5-10H2,1H3,(H,16,17)/b4-3-/t11-,12-/m1/s1	LVQJNKFFJNUFNY-OPVGQWETSA-N	CHEBI:137704
44	1-hexadecyl-2-amino-2-deoxy-sn-glycerol			C19H41NO2	315.534	0	CCCCCCCCCCCCCCCCOC[C@@H](N)CO	1S/C19H41NO2/c1-2-3-4-5-6-7-8-9-10-11-12-13-14-15-16-22-18-19(20)17-21/h19,21H,2-18,20H2,1H3/t19-/m0/s1	BAJLFGHOMLHSCH-IBGZPJMESA-N	CHEBI:78541
45	2-deoxy-d-ribose 1-phosphate			C5H11O7P
46	2,4,5-Trimethylaniline			C9H13N	135.206	0	Cc1cc(C)c(N)cc1C	1S/C9H13N/c1-6-4-8(3)9(10)5-7(6)2/h4-5H,10H2,1-3H3	BMIPMKQAAJKBKP-UHFFFAOYSA-N	CHEBI:82544
47	3-Hydroxyoctadecanoyl-CoA		3-Hydroxyoctadecanoyl-CoA	C16217				1S/C39H70N7O18P3S/c1-4-5-6-7-8-9-10-11-12-13-14-15-16-17-27(47)22-30(49)68-21-20-41-29(48)18-19-42-37(52)34(51)39(2,3)24-61-67(58,59)64-66(56,57)60-23-28-33(63-65(53,54)55)32(50)38(62-28)46-26-45-31-35(40)43-25-44-36(31)46/h25-28,32-34,38,47,50-51H,4-24H2,1-3H3,(H,41,48)(H,42,52)(H,56,57)(H,58,59)(H2,40,43,44)(H2,53,54,55)/t27?,28-,32-,33-,34+,38-/m1/s1
48	Adenosine, 3'-amino-3'-deoxy-2'-O-methyl-		Spalgomycin, Adenosine, 3'-amino-3'-deoxy-, 3'-amino-3'-deoxy adenosine	C10H15N6O3	267.27	0	C(O)C1(C([N+])C(O)C(O1)N2(C3(=C(N=C2)C(N)=NC=N3)))	1S/C10H14N6O3/c11-5-4(1-17)19-10(7(5)18)16-3-15-6-8(12)13-2-14-9(6)16/h2-5,7,10,17-18H,1,11H2,(H2,12,13,14)/p+1/t4-,5?,7-,10?/m1/s1	ILDPUOKUEKVHIL-HOGMLXFGSA-O
49	benzenesulfonate		phenylsulfonate; besylate; Benzenesulfonic acid, ion(1-); benzenemonosulfonate	C6H5O3S	157.167	-1	[O-]S(=O)(=O)c1ccccc1	1S/C6H6O3S/c7-10(8,9)6-4-2-1-3-5-6/h1-5H,(H,7,8,9)/p-1	SRSXLGNVWSONIS-UHFFFAOYSA-M	CHEBI:64457
50	C16 Sphinganine			C16H35NO2				1S/C16H35NO2/c1-2-3-4-5-6-7-8-9-10-11-12-13-16(19)15(17)14-18/h15-16,18-19H,2-14,17H2,1H3/t15-,16+/m0/s1
51	sedoheptulose 1,7-bisphosphate	sedoheptulose 1,7-bisphosphate		C7H16O13P2	370.007			1S/C7H16O13P2/c8-3(1-19-21(13,14)15)5(10)7(12)6(11)4(9)2-20-22(16,17)18/h3,5-8,10-12H,1-2H2,(H2,13,14,15)(H2,16,17,18)/t3-,5-,6-,7-/m1/s1		CHEBI:15072
52	(2S,3R)-2-aminoheptadecane-1,3-diol	(2S,3R)-2-aminoheptadecane-1,3-diol		C17H37NO2	287.5		OC[C@@]([C@@](CCCCCCCCCCCCCC)(O)[H])(N)[H]	1S/C17H37NO2/c1-2-3-4-5-6-7-8-9-10-11-12-13-14-17(20)16(18)15-19/h16-17,19-20H,2-15,18H2,1H3/t16-,17+/m0/s1	KFQUQCFJDMSIJF-DLBZAZTESA-N	CHEBI:137124
53	cis-2-hydroxycinnamate			C9H8O3
54	cis-beta-d-glucosyl-2-hydroxycinnamate			C15H18O8
55	discadenine			C14H20N6O2	304.348	0	CC(C)=CCNc1ncn(CC[C@H](N)C(O)=O)c2ncnc12	1S/C14H20N6O2/c1-9(2)3-5-16-12-11-13(18-7-17-11)20(8-19-12)6-4-10(15)14(21)22/h3,7-8,10,16H,4-6,15H2,1-2H3,(H,21,22)/t10-/m0/s1	KGVAAXZLUAKZEO-JTQLQIEISA-N	CHEBI:15955
56	lysophospholipid			C4H7O7PR2
57	mannopine			C11H22N2O8	310.301	0	NC(=O)CC[C@H](NC[C@@H](O)[C@@H](O)[C@H](O)[C@H](O)CO)C(O)=O	1S/C11H22N2O8/c12-8(17)2-1-5(11(20)21)13-3-6(15)9(18)10(19)7(16)4-14/h5-7,9-10,13-16,18-19H,1-4H2,(H2,12,17)(H,20,21)/t5-,6+,7+,9+,10+/m0/s1	VPRLICVDSGMIKO-SZWOQXJISA-N	CHEBI:80662
58	N-Isobutyl decanamide			C14H29NO	227.389	0	CCCCCCCCCC(=O)NCC(C)C	1S/C14H29NO/c1-4-5-6-7-8-9-10-11-14(16)15-12-13(2)3/h13H,4-12H2,1-3H3,(H,15,16)	JIOJLCAPGHFHDI-UHFFFAOYSA-N
59	sphingomyelin			C24H49N2O6PR
