# Supplementary material for: Enhancing Genome-Scale Model by Integrative Exometabolome and Transcriptome: Unveiling Carbon Assimilation towards Sphingolipid Biosynthetic Capability of Cordyceps militaris
Source: J Fungi (Basel). 2022 Aug 22;8(8):887. doi: 10.3390/jof8080887 (PMC9409897; doi:10.3390/jof8080887)
Supplement: Supplementary file 1 [file jof-08-00887-s001.zip › Supplementary File S5.xlsx]

## Sheet: Index
Supplementary Information
Enhancing Genome-Scale Model by Integrative Exometabolome and Transcriptome: Unveiling Carbon Assimilation towards Sphingolipid Biosynthetic Capability of Cordyceps militaris
Pattsarun Cheawchanlertfa 1,†, Suwalak Chitcharoen 1,2,†, Nachon Raethong 3, Qing Liu 4, Pramote Chumnanpuen 1,5, Panyawarin Soommat 1,6, Yuanda Song 1,4, Mattheos Koffas 7, Kobkul Laoteng 8,*, Wanwipa Vongsangnak 1,5,*
1 Department of Zoology, Faculty of Science, Kasetsart University, Bangkok 10900, Thailand 2 Program in Bioinformatics and Computational Biology, Graduate School, Chulalongkorn University, Bangkok 10330, Thailand 3 Institute of Nutrition, Mahidol University, Nakhon Pathom 73170, Thailand 4 Colin Ratledge Center for Microbial Lipids, School of Agriculture Engineering and Food Sciences, Shandong Un…
Supplementary File S5: The enhanced genome-scale metabolic model (GSMM, iPC1469) of C. militaris
This file includes Supplementary Table S1 to S4.
	Supplementary Table S1. List of genes, metabolites and biochemical reactions associated in the enhanced GSMM (iPC1469) of C. militaris.
	Supplementary Table S2. List of metabolites in the enhanced GSMM (iPC1469) of C. militaris.
	Supplementary Table S3. Compartments in the enhanced GSMM (iPC1469) of C. militaris.
	Supplementary Table S4. List of genes in the enhanced GSMM (iPC1469) of C. militaris.
Note: iPC1469 is the name of genome-scale metabolic model that always represents in silico, name of model developer followed by number of genes (in silico Pattsarun Cheawchanlertfa 1,469).

## Sheet: Table S1
Supplementary Table S1. List of genes, metabolites and biochemical reactions associated in the enhanced GSMM (iPC1469) of C. militaris.
#	ID	NAME	EQUATION	EC-NUMBER	GENE ASSOCIATION	LOWER BOUND	UPPER BOUND	OBJECTIVE	COMPARTMENT	MIRIAM	SUBSYSTEM	REPLACEMENT ID	NOTE	REFERENCE	CONFIDENCE SCORE	rxnBiGGID	database_links
	r0003	D-glucose 1-epimerase	alpha-d-glucose[c] <=> beta-d-glucose[c]	5.1.3.3	CCM_01020 or CCM_05186 or CCM_05987	-1000	1000			kegg.reaction/R01602	Glycolysis/gluconeogenesis		Glycolysis/gluconeogenesis		2	GALM2pp	RHEA: http://identifiers.org/rhea/28675; RHEA: http://identifiers.org/rhea/28676; RHEA: http://identifiers.org/rhea/28677; RHEA: http://identifiers.org/rhea/28678; EC Number: http://identifiers.org/ec-code/5.1.3.3; BioCyc: http://identifiers.org/biocyc/META:ALDOSE1EPIM-RXN; MetaNetX (MNX) Equation: http://identifiers.org/metanetx.reaction/MNXR99987; SEED Reaction: http://identifiers.org/seed.reac…
	r0004	ATP:alpha-D-glucose 6-phosphotransferase	alpha-d-glucose[c] + atp[c] => adp[c] + alpha-d-glucose 6-phosphate[c]	2.7.1.1;2.7.1.1;2.7.1.2	CCM_03320 or CCM_04625 or CCM_06280 or CCM_08316 or CCM_04278	0	1000			kegg.reaction/R01786	Glycolysis/gluconeogenesis		Glycolysis/gluconeogenesis		2	GLUKA	EC Number: http://identifiers.org/ec-code/2.7.1.1; EC Number: http://identifiers.org/ec-code/2.7.1.2; RHEA: http://identifiers.org/rhea/36495; RHEA: http://identifiers.org/rhea/36496; RHEA: http://identifiers.org/rhea/36497; RHEA: http://identifiers.org/rhea/36498; MetaNetX (MNX) Equation: http://identifiers.org/metanetx.reaction/MNXR100284; KEGG Reaction: http://identifiers.org/kegg.reaction/R01…
	r0005	ATP:beta-D-glucose 6-phosphotransferase	atp[c] + beta-d-glucose[c] => adp[c] + beta-d-glucose 6-phosphate[c]	2.7.1.2;2.7.1.1;2.7.1.2	CCM_03320 or CCM_04625 or CCM_06280 or CCM_08316	0	1000			kegg.reaction/R01600	Glycolysis/gluconeogenesis		Glycolysis/gluconeogenesis		2	GLUK	EC Number: http://identifiers.org/ec-code/2.7.1.2; MetaNetX (MNX) Equation: http://identifiers.org/metanetx.reaction/MNXR100283; SEED Reaction: http://identifiers.org/seed.reaction/rxn09502
	r0006	alpha-D-glucose 6-phosphate ketol-isomerase	alpha-d-glucose 6-phosphate[c] <=> beta-d-fructofuranose 6-phosphate[c]	5.3.1.9	CCM_09292	-1000	1000			kegg.reaction/R02740	Glycolysis/gluconeogenesis		Glycolysis/gluconeogenesis		2	HMR_7748
	r0007	beta-D-glucose 6-phosphate ketol-isomerase	beta-d-fructofuranose 6-phosphate[c] <=> beta-d-glucose 6-phosphate[c]	5.3.1.9	CCM_09292	-1000	1000			kegg.reaction/R03321	Glycolysis/gluconeogenesis		Glycolysis/gluconeogenesis		2	HMR_7749
	r0008	alpha-D-glucose 6-phosphate ketol-isomerase	alpha-d-glucose 6-phosphate[c] <=> beta-d-glucose 6-phosphate[c]	5.3.1.9	CCM_09292	-1000	1000			kegg.reaction/R02739	Glycolysis/gluconeogenesis		Glycolysis/gluconeogenesis		2	HMR_7748
	r0009	phosphofructokinase	atp[c] + beta-d-fructofuranose 6-phosphate[c] => adp[c] + beta-d-fructofuranose 1,6-bisphosphate[c]	2.7.1.11;2.7.1.11	CCM_03725	0	1000				Glycolysis/gluconeogenesis		Glycolysis/gluconeogenesis		2	PFK	RHEA: http://identifiers.org/rhea/16109; RHEA: http://identifiers.org/rhea/16110; RHEA: http://identifiers.org/rhea/16111; RHEA: http://identifiers.org/rhea/16112; EC Number: http://identifiers.org/ec-code/2.7.1.11; MetaNetX (MNX) Equation: http://identifiers.org/metanetx.reaction/MNXR102507
	r0010	fructose-bisphosphate aldolase	beta-d-fructofuranose 1,6-bisphosphate[c] <=> d-glyceraldehyde 3-phosphate[c] + glycerone phosphate[c]	4.1.2.13	CCM_00743 or CCM_06361 or CCM_08255	-1000	1000				Glycolysis/gluconeogenesis		Glycolysis/gluconeogenesis		2	FBA	RHEA: http://identifiers.org/rhea/14729; RHEA: http://identifiers.org/rhea/14730; RHEA: http://identifiers.org/rhea/14731; RHEA: http://identifiers.org/rhea/14732; EC Number: http://identifiers.org/ec-code/4.1.2.13; MetaNetX (MNX) Equation: http://identifiers.org/metanetx.reaction/MNXR99459; KEGG Reaction: http://identifiers.org/kegg.reaction/R01068; SEED Reaction: http://identifiers.org/seed.rea…
	r0011	D-glyceraldehyde-3-phosphate aldose-ketose-isomerase	d-glyceraldehyde 3-phosphate[c] <=> glycerone phosphate[c]	5.3.1.1	CCM_01640 or CCM_01674	-1000	1000				Glycolysis/gluconeogenesis		Glycolysis/gluconeogenesis		2	TPI	RHEA: http://identifiers.org/rhea/18585; RHEA: http://identifiers.org/rhea/18586; RHEA: http://identifiers.org/rhea/18587; RHEA: http://identifiers.org/rhea/18588; EC Number: http://identifiers.org/ec-code/5.3.1.1; BioCyc: http://identifiers.org/biocyc/META:TRIOSEPISOMERIZATION-RXN; MetaNetX (MNX) Equation: http://identifiers.org/metanetx.reaction/MNXR104918; Reactome Reaction: http://identifiers…
	r0012	glyceraldehyde-3-phosphate dehydrogenase	3-phospho-d-glyceroyl phosphate[c] + nadh[c] <=> d-glyceraldehyde 3-phosphate[c] + nad(+)[c] + phosphate[c]	1.2.1.12	CCM_04549	-1000	1000				Glycolysis/gluconeogenesis		Glycolysis/gluconeogenesis		2	GAPD	EC Number: http://identifiers.org/ec-code/1.2.1.12; EC Number: http://identifiers.org/ec-code/1.2.1.59; RHEA: http://identifiers.org/rhea/10300; RHEA: http://identifiers.org/rhea/10301; RHEA: http://identifiers.org/rhea/10302; RHEA: http://identifiers.org/rhea/10303; BioCyc: http://identifiers.org/biocyc/META:GAPOXNPHOSPHN-RXN; MetaNetX (MNX) Equation: http://identifiers.org/metanetx.reaction/MNX…
	r0014	phosphoglycerate mutase	2-phospho-d-glycerate[c] <=> 3-phospho-d-glycerate[c]	5.4.2.1	CCM_01016 or CCM_02604 or CCM_06480	-1000	1000				Glycolysis/gluconeogenesis		Glycolysis/gluconeogenesis		2	PGM	RHEA: http://identifiers.org/rhea/15901; RHEA: http://identifiers.org/rhea/15902; RHEA: http://identifiers.org/rhea/15903; RHEA: http://identifiers.org/rhea/15904; EC Number: http://identifiers.org/ec-code/5.4.2.1; EC Number: http://identifiers.org/ec-code/5.4.2.11; EC Number: http://identifiers.org/ec-code/5.4.2.12; BioCyc: http://identifiers.org/biocyc/META:3PGAREARR-RXN; BioCyc: http://identif…
	r0015	2-phospho-D-glycerate hydro-lyase (phosphoenolpyruvate-forming)	2-phospho-d-glycerate[c] <=> h2o[c] + phosphoenolpyruvate[c]	4.2.1.11	CCM_06659	-1000	1000			kegg.reaction/R00658	Glycolysis/gluconeogenesis		Glycolysis/gluconeogenesis		2	ENOm	RHEA: http://identifiers.org/rhea/10164; RHEA: http://identifiers.org/rhea/10165; RHEA: http://identifiers.org/rhea/10166; RHEA: http://identifiers.org/rhea/10167; EC Number: http://identifiers.org/ec-code/4.2.1.11; BioCyc: http://identifiers.org/biocyc/META:2PGADEHYDRAT-RXN; MetaNetX (MNX) Equation: http://identifiers.org/metanetx.reaction/MNXR97932; Reactome Reaction: http://identifiers.org/rea…
	r0016	pyruvate kinase	adp[c] + phosphoenolpyruvate[c] => atp[c] + pyruvate[c]	2.7.1.40	CCM_06062	0	1000				Glycolysis/gluconeogenesis		Glycolysis/gluconeogenesis		2	PYK	RHEA: http://identifiers.org/rhea/18157; RHEA: http://identifiers.org/rhea/18158; RHEA: http://identifiers.org/rhea/18159; RHEA: http://identifiers.org/rhea/18160; EC Number: http://identifiers.org/ec-code/2.7.1.40; BioCyc: http://identifiers.org/biocyc/META:PEPDEPHOS-RXN; MetaNetX (MNX) Equation: http://identifiers.org/metanetx.reaction/MNXR103371; Reactome Reaction: http://identifiers.org/react…
	r0017	fructose-1,6-bisphosphatase	beta-d-fructofuranose 1,6-bisphosphate[c] + h2o[c] => beta-d-fructofuranose 6-phosphate[c] + phosphate[c]	3.1.3.11;3.1.3.11	CCM_00341	0	1000				Glycolysis/gluconeogenesis		Glycolysis/gluconeogenesis		2	FBP	RHEA: http://identifiers.org/rhea/11064; RHEA: http://identifiers.org/rhea/11065; RHEA: http://identifiers.org/rhea/11066; RHEA: http://identifiers.org/rhea/11067; EC Number: http://identifiers.org/ec-code/3.1.3.11; MetaNetX (MNX) Equation: http://identifiers.org/metanetx.reaction/MNXR99465
	r0018	phosphoenolpyruvate carboxykinase (ATP)	atp[c] + oxaloacetate[c] => adp[c] + co2[c] + phosphoenolpyruvate[c]	4.1.1.49;4.1.1.49	CCM_04470	0	1000				Glycolysis/gluconeogenesis		Glycolysis/gluconeogenesis		2	PPCK	RHEA: http://identifiers.org/rhea/18617; RHEA: http://identifiers.org/rhea/18618; RHEA: http://identifiers.org/rhea/18619; RHEA: http://identifiers.org/rhea/18620; EC Number: http://identifiers.org/ec-code/4.1.1.49; BioCyc: http://identifiers.org/biocyc/META:PEPCARBOXYKIN-RXN; MetaNetX (MNX) Equation: http://identifiers.org/metanetx.reaction/MNXR103099; KEGG Reaction: http://identifiers.org/kegg.…
	r0019	ethanol:NADP+ oxidoreductase	acetaldehyde[c] + nadph[c] <=> ethanol[c] + nadp(+)[c]	1.1.1.2	CCM_01806 or CCM_02761 or CCM_07382 or CCM_08946 or CCM_03437	-1000	1000			kegg.reaction/R00746	Glycolysis/gluconeogenesis		Glycolysis/gluconeogenesis		2	ALCDH_nadp_hi	EC Number: http://identifiers.org/ec-code/1.1.1.1; EC Number: http://identifiers.org/ec-code/1.1.1.184; EC Number: http://identifiers.org/ec-code/1.1.1.2; EC Number: http://identifiers.org/ec-code/1.1.1.21; EC Number: http://identifiers.org/ec-code/1.1.1.71; BioCyc: http://identifiers.org/biocyc/META:RXN-12484; MetaNetX (MNX) Equation: http://identifiers.org/metanetx.reaction/MNXR95726; KEGG Reac…
	r0020	ethanol:NAD+ oxidoreductase	acetaldehyde[c] + nadh[c] <=> ethanol[c] + nad(+)[c]	1.1.1.1	CCM_00356 or CCM_00451 or CCM_02484 or CCM_03437 or CCM_07377 or CCM_01942 or CCM_03363 or CCM_04723 or CCM_05747 or CCM_07377 or CCM_07863 or CCM_08262 or CCM_08721	-1000	1000			kegg.reaction/R00754	Glycolysis/gluconeogenesis		Glycolysis/gluconeogenesis		2	ALCD2x	EC Number: http://identifiers.org/ec-code/1.1.1.1; EC Number: http://identifiers.org/ec-code/1.1.1.71; RHEA: http://identifiers.org/rhea/25290; RHEA: http://identifiers.org/rhea/25291; RHEA: http://identifiers.org/rhea/25292; RHEA: http://identifiers.org/rhea/25293; BioCyc: http://identifiers.org/biocyc/META:ALCOHOL-DEHYDROG-RXN; MetaNetX (MNX) Equation: http://identifiers.org/metanetx.reaction/M…
	r0022	pyruvate:[dihydrolipoyllysine-residue acetyltransferase]-lipoyllysine 2-oxidoreductase (decarboxylating, acceptor-acetylating)	lipoamide-[enzyme][m] + pyruvate[m] => co2[m] + s-acetyldihydrolipoamide-[enzyme][m]	1.2.4.1	CCM_01079 or CCM_01808 or CCM_02853 or CCM_05680 or CCM_06041 or CCM_08354 or CCM_08657 or CCM_05896 or CCM_01222	0	1000			kegg.reaction/R01699	Glycolysis/gluconeogenesis		Glycolysis/gluconeogenesis		2	PDHa	EC Number: http://identifiers.org/ec-code/1.2.4.1; MetaNetX (MNX) Equation: http://identifiers.org/metanetx.reaction/MNXR102427; SEED Reaction: http://identifiers.org/seed.reaction/rxn01242
	r0023	acetyl-CoA:enzyme N6-(dihydrolipoyl)lysine S-acetyltransferase	coenzyme a[m] + s-acetyldihydrolipoamide-[enzyme][m] => acetyl-coa[m] + dihydrolipoamide-[enzyme][m]	2.3.1.12	CCM_08657 or CCM_05680	0	1000			kegg.reaction/R02569	Glycolysis/gluconeogenesis		Glycolysis/gluconeogenesis		2	PDH	EC Number: http://identifiers.org/ec-code/1.2.1; EC Number: http://identifiers.org/ec-code/1.2.1.51; EC Number: http://identifiers.org/ec-code/1.2.4.1; EC Number: http://identifiers.org/ec-code/1.8.1.4; EC Number: http://identifiers.org/ec-code/2.3.1.12; RHEA: http://identifiers.org/rhea/28042; RHEA: http://identifiers.org/rhea/28043; RHEA: http://identifiers.org/rhea/28044; RHEA: http://identifi…
	r0024	dihydrolipoamide:NAD+ oxidoreductase	dihydrolipoamide-[enzyme][m] + nad(+)[m] => lipoamide-[enzyme][m] + nadh[m]	1.8.1.4	CCM_01222	0	1000			kegg.reaction/R01698	Glycolysis/gluconeogenesis		Glycolysis/gluconeogenesis		2	GCC2cm	EC Number: http://identifiers.org/ec-code/1.8.1; EC Number: http://identifiers.org/ec-code/1.8.1.4; RHEA: http://identifiers.org/rhea/33059; RHEA: http://identifiers.org/rhea/33060; RHEA: http://identifiers.org/rhea/33061; RHEA: http://identifiers.org/rhea/33062; BioCyc: http://identifiers.org/biocyc/META:RXN-18331; MetaNetX (MNX) Equation: http://identifiers.org/metanetx.reaction/MNXR100066; KEG…
	r0027	glucose-6-phosphate 1-dehydrogenase	alpha-d-glucose 6-phosphate[c] + nadp(+)[c] => 6-o-phosphono-d-glucono-1,5-lactone[c] + nadph[c]	1.1.1.49	CCM_06983	0	1000				Pentose phosphate pathway		Pentose phosphate pathway		2	G6PDH2r	EC Number: http://identifiers.org/ec-code/1.1.1.363; EC Number: http://identifiers.org/ec-code/1.1.1.49; RHEA: http://identifiers.org/rhea/15841; RHEA: http://identifiers.org/rhea/15842; RHEA: http://identifiers.org/rhea/15843; RHEA: http://identifiers.org/rhea/15844; BioCyc: http://identifiers.org/biocyc/META:GLU6PDEHYDROG-RXN; MetaNetX (MNX) Equation: http://identifiers.org/metanetx.reaction/MN…
	r0028	6-phospho-D-glucono-1,5-lactone lactonohydrolase	6-o-phosphono-d-glucono-1,5-lactone[c] + h2o[c] => 6-phospho-d-gluconate[c]	3.1.1.31;3.1.1.31	CCM_08546	0	1000			kegg.reaction/R02035	Pentose phosphate pathway		Pentose phosphate pathway		2	PGL	RHEA: http://identifiers.org/rhea/12556; RHEA: http://identifiers.org/rhea/12557; RHEA: http://identifiers.org/rhea/12558; RHEA: http://identifiers.org/rhea/12559; EC Number: http://identifiers.org/ec-code/3.1.1.31; BioCyc: http://identifiers.org/biocyc/META:6PGLUCONOLACT-RXN; MetaNetX (MNX) Equation: http://identifiers.org/metanetx.reaction/MNXR102539; Reactome Reaction: http://identifiers.org/r…
	r0029	6-phospho-D-gluconate:NADP+ 2-oxidoreductase (decarboxylating)	6-phospho-d-gluconate[c] + nadp(+)[c] => co2[c] + d-ribulose 5-phosphate[c] + nadph[c]	1.1.1.44;1.1.1.351;1.1.1.44	CCM_06873 or CCM_06897	0	1000			kegg.reaction/R01528	Pentose phosphate pathway		Pentose phosphate pathway		2	GND	EC Number: http://identifiers.org/ec-code/1.1.1.351; EC Number: http://identifiers.org/ec-code/1.1.1.44; RHEA: http://identifiers.org/rhea/10116; RHEA: http://identifiers.org/rhea/10117; RHEA: http://identifiers.org/rhea/10118; RHEA: http://identifiers.org/rhea/10119; BioCyc: http://identifiers.org/biocyc/META:RXN-9952; MetaNetX (MNX) Equation: http://identifiers.org/metanetx.reaction/MNXR100389;…
	r0030	D-ribulose-5-phosphate 3-epimerase	d-ribulose 5-phosphate[c] <=> d-xylulose 5-phosphate[c]	5.1.3.1	CCM_09525	-1000	1000			kegg.reaction/R01529	Pentose phosphate pathway		Pentose phosphate pathway		2	RPEh	RHEA: http://identifiers.org/rhea/13677; RHEA: http://identifiers.org/rhea/13678; RHEA: http://identifiers.org/rhea/13679; RHEA: http://identifiers.org/rhea/13680; EC Number: http://identifiers.org/ec-code/5.1.3.1; BioCyc: http://identifiers.org/biocyc/META:RIBULP3EPIM-RXN; MetaNetX (MNX) Equation: http://identifiers.org/metanetx.reaction/MNXR104083; Reactome Reaction: http://identifiers.org/reac…
	r0031	D-ribose-5-phosphate aldose-ketose-isomerase	d-ribose 5-phosphate[c] <=> d-ribulose 5-phosphate[c]	5.3.1.6	CCM_00462	-1000	1000			kegg.reaction/R01056	Pentose phosphate pathway		Pentose phosphate pathway		2	RPI	EC Number: http://identifiers.org/ec-code/5.3.1.6; MetaNetX (MNX) Equation: http://identifiers.org/metanetx.reaction/MNXR104084
	r0032	sedoheptulose-7-phosphate:D-glyceraldehyde-3-phosphate glycolaldehyde transferase	d-glyceraldehyde 3-phosphate[c] + sedoheptulose 7-phosphate[c] <=> d-ribose 5-phosphate[c] + d-xylulose 5-phosphate[c]	2.2.1.1	CCM_00345 or CCM_00667	-1000	1000			kegg.reaction/R01641	Pentose phosphate pathway		Pentose phosphate pathway		2	TKT2	EC Number: http://identifiers.org/ec-code/2.2.1.1; RHEA: http://identifiers.org/rhea/27626; RHEA: http://identifiers.org/rhea/27627; RHEA: http://identifiers.org/rhea/27628; RHEA: http://identifiers.org/rhea/27629; BioCyc: http://identifiers.org/biocyc/META:2TRANSKETO-RXN; MetaNetX (MNX) Equation: http://identifiers.org/metanetx.reaction/MNXR104869; KEGG Reaction: http://identifiers.org/kegg.reac…
	r0033	transketolase	beta-d-fructofuranose 6-phosphate[c] + d-glyceraldehyde 3-phosphate[c] <=> d-erythrose 4-phosphate[c] + d-xylulose 5-phosphate[c]	2.2.1.1	CCM_00345 or CCM_00667	-1000	1000				Pentose phosphate pathway		Pentose phosphate pathway		2	TKT2	EC Number: http://identifiers.org/ec-code/2.2.1.1; RHEA: http://identifiers.org/rhea/27626; RHEA: http://identifiers.org/rhea/27627; RHEA: http://identifiers.org/rhea/27628; RHEA: http://identifiers.org/rhea/27629; BioCyc: http://identifiers.org/biocyc/META:2TRANSKETO-RXN; MetaNetX (MNX) Equation: http://identifiers.org/metanetx.reaction/MNXR104869; KEGG Reaction: http://identifiers.org/kegg.reac…
	r0034	sedoheptulose-7-phosphate:D-glyceraldehyde-3-phosphate glyceronetransferase	beta-d-fructofuranose 6-phosphate[c] + d-erythrose 4-phosphate[c] <=> d-glyceraldehyde 3-phosphate[c] + sedoheptulose 7-phosphate[c]	2.2.1.2	CCM_03324	-1000	1000			kegg.reaction/R01827	Pentose phosphate pathway		Pentose phosphate pathway		2	TALA	RHEA: http://identifiers.org/rhea/17053; RHEA: http://identifiers.org/rhea/17054; RHEA: http://identifiers.org/rhea/17055; RHEA: http://identifiers.org/rhea/17056; EC Number: http://identifiers.org/ec-code/2.2.1.2; BioCyc: http://identifiers.org/biocyc/META:TRANSALDOL-RXN; MetaNetX (MNX) Equation: http://identifiers.org/metanetx.reaction/MNXR104715; KEGG Reaction: http://identifiers.org/kegg.reac…
	r0037	ATP:D-ribose 5-phosphotransferase	atp[c] + d-ribose[c] => adp[c] + d-ribose 5-phosphate[c]	2.7.1.15;2.7.1.15	CCM_05337	0	1000			kegg.reaction/R01051	Pentose phosphate pathway		Pentose phosphate pathway		2	RBK	EC Number: http://identifiers.org/ec-code/2.7.1.15; MetaNetX (MNX) Equation: http://identifiers.org/metanetx.reaction/MNXR103431
	r0038	ATP:D-gluconate 6-phosphotransferase	atp[c] + d-gluconate[c] => 6-phospho-d-gluconate[c] + adp[c]	2.7.1.12;2.7.1.12	CCM_01692 or CCM_05895	0	1000			kegg.reaction/R01737	Pentose phosphate pathway		Pentose phosphate pathway		2	GNKh	RHEA: http://identifiers.org/rhea/19433; RHEA: http://identifiers.org/rhea/19434; RHEA: http://identifiers.org/rhea/19435; RHEA: http://identifiers.org/rhea/19436; EC Number: http://identifiers.org/ec-code/2.7.1.12; BioCyc: http://identifiers.org/biocyc/META:GLUCONOKIN-RXN; MetaNetX (MNX) Equation: http://identifiers.org/metanetx.reaction/MNXR100390; KEGG Reaction: http://identifiers.org/kegg.rea…
	r0039	phosphoglucomutase	d-ribose 1-phosphate[c] <=> d-ribose 5-phosphate[c]	5.4.2.2	CCM_02278	-1000	1000				Pentose phosphate pathway		Pentose phosphate pathway		2	PGMT	EC Number: http://identifiers.org/ec-code/5.4.2.2; EC Number: http://identifiers.org/ec-code/5.4.2.5; EC Number: http://identifiers.org/ec-code/5.4.2.8; BioCyc: http://identifiers.org/biocyc/META:PHOSPHOGLUCMUT-RXN; BioCyc: http://identifiers.org/biocyc/META:RXN-16999; MetaNetX (MNX) Equation: http://identifiers.org/metanetx.reaction/MNXR102548; KEGG Reaction: http://identifiers.org/kegg.reaction…
	r0041	acid phosphatase (aphA)	6-phospho-d-gluconate[c] + h2o[c] => d-gluconate[c] + phosphate[c]	3.1.3.2	CCM_00187 or CCM_07972 or CCM_04038 or CCM_05160 or CCM_08674 or CCM_02293 or CCM_00481 or CCM_02266 or CCM_07556 or CCM_07965 or CCM_08728	0	1000				Pentose phosphate pathway		Pentose phosphate pathway		2	NADPPPSm	RHEA: http://identifiers.org/rhea/28050; RHEA: http://identifiers.org/rhea/28051; RHEA: http://identifiers.org/rhea/28052; RHEA: http://identifiers.org/rhea/28053; EC Number: http://identifiers.org/ec-code/3.1.3.-; EC Number: http://identifiers.org/ec-code/3.1.3.1; EC Number: http://identifiers.org/ec-code/3.1.3.2; BioCyc: http://identifiers.org/biocyc/META:RXN-5822; MetaNetX (MNX) Equation: http…
	r0044	D-glucono-1,5-lactone lactonohydrolase	d-glucono-1,5-lactone[e] + h2o[e] => d-gluconate[e]	3.1.1.17	CCM_06360 or CCM_07166	0	1000			kegg.reaction/R01519	Pentose phosphate pathway		Pentose phosphate pathway		2	DASCBH	EC Number: http://identifiers.org/ec-code/3.1.1.17; MetaNetX (MNX) Equation: http://identifiers.org/metanetx.reaction/MNXR97151; KEGG Reaction: http://identifiers.org/kegg.reaction/R04785; SEED Reaction: http://identifiers.org/seed.reaction/rxn03275
	r0046	pyruvate carboxy-lyase (acetaldehyde-forming)	pyruvate[c] => acetaldehyde[c] + co2[c]	4.1.1.1	CCM_01231 or CCM_05869	0	1000			kegg.reaction/R00224	Pyruvate metabolism		Pyruvate metabolism		2	PYRDC_1	EC Number: http://identifiers.org/ec-code/4.1.1.1; RHEA: http://identifiers.org/rhea/45484; RHEA: http://identifiers.org/rhea/45485; RHEA: http://identifiers.org/rhea/45486; RHEA: http://identifiers.org/rhea/45487; BioCyc: http://identifiers.org/biocyc/META:RXN-6161; MetaNetX (MNX) Equation: http://identifiers.org/metanetx.reaction/MNXR103379; KEGG Reaction: http://identifiers.org/kegg.reaction/R…
	r0047	(S)-lactaldehyde:NAD+ oxidoreductase	h2o[c] + lactaldehyde[c] + nad(+)[c] => (r)-lactate[c] + nadh[c]	1.2.1.3	CCM_05126 or CCM_08195 or CCM_08475 or CCM_00452 or CCM_02203 or CCM_05450 or CCM_07151 or CCM_09155	0	1000			kegg.reaction/R01446	Pyruvate metabolism		Pyruvate metabolism		2	LCADi	EC Number: http://identifiers.org/ec-code/1.2.1.22; RHEA: http://identifiers.org/rhea/14277; RHEA: http://identifiers.org/rhea/14278; RHEA: http://identifiers.org/rhea/14279; RHEA: http://identifiers.org/rhea/14280; BioCyc: http://identifiers.org/biocyc/META:LACTALDDEHYDROG-RXN; MetaNetX (MNX) Equation: http://identifiers.org/metanetx.reaction/MNXR101018; KEGG Reaction: http://identifiers.org/keg…
	r0048	glycolaldehyde:NAD+ oxidoreductase	glycolaldehyde[c] + h2o[c] + nad(+)[c] <=> glycolate[c] + nadh[c]	1.2.1.3	CCM_05126 or CCM_08195 or CCM_08475 or CCM_00452 or CCM_02203 or CCM_05450 or CCM_07151 or CCM_09155	-1000	1000			kegg.reaction/R01333	Pyruvate metabolism		Pyruvate metabolism		2	GCALDDm	EC Number: http://identifiers.org/ec-code/1.2.1.21; RHEA: http://identifiers.org/rhea/20001; RHEA: http://identifiers.org/rhea/20002; RHEA: http://identifiers.org/rhea/20003; RHEA: http://identifiers.org/rhea/20004; BioCyc: http://identifiers.org/biocyc/META:GLYCOLALD-DEHYDROG-RXN; MetaNetX (MNX) Equation: http://identifiers.org/metanetx.reaction/MNXR100060; KEGG Reaction: http://identifiers.org/…
	r0049	(S)-lactaldehyde:NAD+ oxidoreductase	h2o[m] + lactaldehyde[m] + nad(+)[m] => (r)-lactate[m] + nadh[m]	1.2.1.3	CCM_05126 or CCM_08195 or CCM_08475 or CCM_00452 or CCM_02203 or CCM_05450 or CCM_07151 or CCM_09155	0	1000			kegg.reaction/R01446	Pyruvate metabolism		Pyruvate metabolism		2	LCADi	EC Number: http://identifiers.org/ec-code/1.2.1.22; RHEA: http://identifiers.org/rhea/14277; RHEA: http://identifiers.org/rhea/14278; RHEA: http://identifiers.org/rhea/14279; RHEA: http://identifiers.org/rhea/14280; BioCyc: http://identifiers.org/biocyc/META:LACTALDDEHYDROG-RXN; MetaNetX (MNX) Equation: http://identifiers.org/metanetx.reaction/MNXR101018; KEGG Reaction: http://identifiers.org/keg…
	r0050	(R)-S-lactoylglutathione methylglyoxal-lyase (isomerizing)	(r)-s-lactoylglutathione[c] <=> glutathione[c] + methylglyoxal[c]	4.4.1.5	CCM_05095	-1000	1000			kegg.reaction/R02530	Pyruvate metabolism		Pyruvate metabolism		2	LGTHL	RHEA: http://identifiers.org/rhea/19069; RHEA: http://identifiers.org/rhea/19070; RHEA: http://identifiers.org/rhea/19071; RHEA: http://identifiers.org/rhea/19072; EC Number: http://identifiers.org/ec-code/4.4.1.5; BioCyc: http://identifiers.org/biocyc/META:GLYOXI-RXN; MetaNetX (MNX) Equation: http://identifiers.org/metanetx.reaction/MNXR100355; Reactome Reaction: http://identifiers.org/reactome/…
	r0051	(R)-S-lactoylglutathione hydrolase	(r)-s-lactoylglutathione[c] + h2o[c] => (r)-lactate[c] + glutathione[c]	3.1.2.6;3.1.2.6	CCM_04150 or CCM_04156 or CCM_05589	0	1000			kegg.reaction/R01736	Pyruvate metabolism		Pyruvate metabolism		2	GLYOX	RHEA: http://identifiers.org/rhea/25245; RHEA: http://identifiers.org/rhea/25246; RHEA: http://identifiers.org/rhea/25247; RHEA: http://identifiers.org/rhea/25248; EC Number: http://identifiers.org/ec-code/3.1.2.6; BioCyc: http://identifiers.org/biocyc/META:GLYOXII-RXN; MetaNetX (MNX) Equation: http://identifiers.org/metanetx.reaction/MNXR100353; KEGG Reaction: http://identifiers.org/kegg.reactio…
	r0052	acetaldehyde:NAD+ oxidoreductase	acetaldehyde[c] + h2o[c] + nad(+)[c] => acetate[c] + nadh[c]	1.2.1.3;1.2.1.3;1.2.1.5	CCM_00452 or CCM_05126 or CCM_08195 or CCM_08475 or CCM_02203 or CCM_05450 or CCM_07151 or CCM_09155	0	1000			kegg.reaction/R00710	Pyruvate metabolism		Pyruvate metabolism		2	ALDD2x	EC Number: http://identifiers.org/ec-code/1.2.1.3; EC Number: http://identifiers.org/ec-code/1.2.1.5; RHEA: http://identifiers.org/rhea/25294; RHEA: http://identifiers.org/rhea/25295; RHEA: http://identifiers.org/rhea/25296; RHEA: http://identifiers.org/rhea/25297; BioCyc: http://identifiers.org/biocyc/META:RXN66-3; MetaNetX (MNX) Equation: http://identifiers.org/metanetx.reaction/MNXR95749; Reac…
	r0053	acetaldehyde:NAD+ oxidoreductase	acetaldehyde[m] + h2o[m] + nad(+)[m] => acetate[m] + nadh[m]	1.2.1.3	CCM_05126 or CCM_08195 or CCM_08475 or CCM_00452 or CCM_02203 or CCM_05450 or CCM_07151 or CCM_09155	0	1000			kegg.reaction/R00710	Pyruvate metabolism		Pyruvate metabolism		2	ALDD2x	EC Number: http://identifiers.org/ec-code/1.2.1.3; EC Number: http://identifiers.org/ec-code/1.2.1.5; RHEA: http://identifiers.org/rhea/25294; RHEA: http://identifiers.org/rhea/25295; RHEA: http://identifiers.org/rhea/25296; RHEA: http://identifiers.org/rhea/25297; BioCyc: http://identifiers.org/biocyc/META:RXN66-3; MetaNetX (MNX) Equation: http://identifiers.org/metanetx.reaction/MNXR95749; Reac…
	r0054	acetaldehyde:NADP+ oxidoreductase	acetaldehyde[c] + h2o[c] + nadp(+)[c] => acetate[c] + nadph[c]	1.2.1.5;1.2.1.-;1.2.1.4;1.2.1.5	CCM_08195 or CCM_09155	0	1000			kegg.reaction/R00711	Pyruvate metabolism		Pyruvate metabolism		2	ALDD2y	EC Number: http://identifiers.org/ec-code/1.2.1.-; EC Number: http://identifiers.org/ec-code/1.2.1.4; EC Number: http://identifiers.org/ec-code/1.2.1.5; RHEA: http://identifiers.org/rhea/25298; RHEA: http://identifiers.org/rhea/25299; RHEA: http://identifiers.org/rhea/25300; RHEA: http://identifiers.org/rhea/25301; BioCyc: http://identifiers.org/biocyc/META:RXN0-3962; MetaNetX (MNX) Equation: htt…
	r0057	NAD-dependent alcohol dehydrogenase	formaldehyde[c] + nadh[c] <=> methanol[c] + nad(+)[c]	1.1.1.1	CCM_00356 or CCM_00451 or CCM_02484 or CCM_03437 or CCM_04357 or CCM_07377 or CCM_09031 or CCM_01942 or CCM_03363 or CCM_04723 or CCM_05747 or CCM_05807 or CCM_07863 or CCM_08262 or CCM_08721	-1000	1000				Pyruvate metabolism		Pyruvate metabolism		2	RE1711C_2	EC Number: http://identifiers.org/ec-code/1.1.1.1; BioCyc: http://identifiers.org/biocyc/META:RXN-10781; MetaNetX (MNX) Equation: http://identifiers.org/metanetx.reaction/MNXR103538
	r0058	(S)-malate:NADP+ oxidoreductase(oxaloacetate-decarboxylating)	(s)-malate[m] + nadp(+)[m] => co2[m] + nadph[m] + pyruvate[m]	1.1.1.40	CCM_07785	0	1000			kegg.reaction/R00216	Pyruvate metabolism		Pyruvate metabolism		2	ME2	EC Number: http://identifiers.org/ec-code/1.1.1.40; RHEA: http://identifiers.org/rhea/18253; RHEA: http://identifiers.org/rhea/18254; RHEA: http://identifiers.org/rhea/18255; RHEA: http://identifiers.org/rhea/18256; BioCyc: http://identifiers.org/biocyc/META:MALIC-NADP-RXN; MetaNetX (MNX) Equation: http://identifiers.org/metanetx.reaction/MNXR101443; KEGG Reaction: http://identifiers.org/kegg.rea…
	r0059	(S)-malate:NADP+ oxidoreductase(oxaloacetate-decarboxylating)	(s)-malate[c] + nadp(+)[c] => co2[c] + nadph[c] + pyruvate[c]	1.1.1.40;1.1.1.40	CCM_07785 or CCM_08301	0	1000			kegg.reaction/R00216	Pyruvate metabolism		Pyruvate metabolism		2	ME2	EC Number: http://identifiers.org/ec-code/1.1.1.40; RHEA: http://identifiers.org/rhea/18253; RHEA: http://identifiers.org/rhea/18254; RHEA: http://identifiers.org/rhea/18255; RHEA: http://identifiers.org/rhea/18256; BioCyc: http://identifiers.org/biocyc/META:MALIC-NADP-RXN; MetaNetX (MNX) Equation: http://identifiers.org/metanetx.reaction/MNXR101443; KEGG Reaction: http://identifiers.org/kegg.rea…
	r0060	(S)-malate:NAD+ oxidoreductase (decarboxylating)	(s)-malate[c] + nad(+)[c] => co2[c] + nadh[c] + pyruvate[c]	1.1.1.38;1.1.1.38;1.1.1.39	CCM_08301	0	1000			kegg.reaction/R00214	Pyruvate metabolism		Pyruvate metabolism		2	ME1	EC Number: http://identifiers.org/ec-code/1.1.1.38; EC Number: http://identifiers.org/ec-code/1.1.1.39; RHEA: http://identifiers.org/rhea/12653; RHEA: http://identifiers.org/rhea/12654; RHEA: http://identifiers.org/rhea/12655; RHEA: http://identifiers.org/rhea/12656; BioCyc: http://identifiers.org/biocyc/META:1.1.1.39-RXN; MetaNetX (MNX) Equation: http://identifiers.org/metanetx.reaction/MNXR1014…
	r0064	(S)-lactate:NAD+ oxidoreductase	(s)-lactate[c] + nad(+)[c] => nadh[c] + pyruvate[c]	1.1.1.27;1.1.1.27	CCM_06299 or CCM_08025	0	1000			kegg.reaction/R00703	Pyruvate metabolism		Pyruvate metabolism		2	LDH_Lm	EC Number: http://identifiers.org/ec-code/1.1.1.27; RHEA: http://identifiers.org/rhea/23444; RHEA: http://identifiers.org/rhea/23445; RHEA: http://identifiers.org/rhea/23446; RHEA: http://identifiers.org/rhea/23447; BioCyc: http://identifiers.org/biocyc/META:L-LACTATE-DEHYDROGENASE-RXN; MetaNetX (MNX) Equation: http://identifiers.org/metanetx.reaction/MNXR101040; Reactome Reaction: http://identif…
	r0065	(S)-lactate:ferricytochrome-c 2-oxidoreductase	(s)-lactate[m] + 2 ferricytochrome c[m] => 2 ferrocytochrome c[m] + pyruvate[m]	1.1.2.3	CCM_02991 or CCM_05911	0	1000			kegg.reaction/R00196	Pyruvate metabolism		Pyruvate metabolism		2	L_LACD3	EC Number: http://identifiers.org/ec-code/1.1.2.3; MetaNetX (MNX) Equation: http://identifiers.org/metanetx.reaction/MNXR101275; SEED Reaction: http://identifiers.org/seed.reaction/rxn08793
	r0066	(R)-lactate:ferricytochrome-c 2-oxidoreductase	(r)-lactate[m] + 2 ferricytochrome c[m] => 2 ferrocytochrome c[m] + pyruvate[m]	1.1.2.4	CCM_00068 or CCM_03261	0	1000			kegg.reaction/R00197	Pyruvate metabolism		Pyruvate metabolism		2	HMR_3859
	r0067	pyruvate:carbon-dioxide ligase (ADP-forming)	atp[c] + co2[c] + h2o[c] + pyruvate[c] => adp[c] + oxaloacetate[c] + phosphate[c]	6.4.1.1	CCM_02207 or CCM_03243 or CCM_03431	0	1000			kegg.reaction/R00344	Pyruvate metabolism		Pyruvate metabolism		2	PC	RHEA: http://identifiers.org/rhea/20844; RHEA: http://identifiers.org/rhea/20845; RHEA: http://identifiers.org/rhea/20846; RHEA: http://identifiers.org/rhea/20847; EC Number: http://identifiers.org/ec-code/6.4.1.1; BioCyc: http://identifiers.org/biocyc/META:PYRUVATE-CARBOXYLASE-RXN; MetaNetX (MNX) Equation: http://identifiers.org/metanetx.reaction/MNXR102391; KEGG Reaction: http://identifiers.org…
	r0069	lactaldehyde:NADP+ oxidoreductase	methylglyoxal[c] + nadph[c] => lactaldehyde[c] + nadp(+)[c]	1.1.1.283	CCM_05147	0	1000			kegg.reaction/R07139	Pyruvate metabolism		Pyruvate metabolism		2
	r0070	propanoate:CoA ligase (AMP-forming)	atp[m] + coenzyme a[m] + propionate[m] => amp[m] + diphosphate[m] + propionyl-coa[m]	6.2.1.17	CCM_01999	0	1000			kegg.reaction/R00925	Propanoate and butanoate metabolism		Propanoate and butanoate metabolism		2	PPACOALh	EC Number: http://identifiers.org/ec-code/6.2.1.17; MetaNetX (MNX) Equation: http://identifiers.org/metanetx.reaction/MNXR95222
	r0071	1-aminocyclopropane-1-carboxylate aminohydrolase (isomerizing)	1-aminocyclopropanecarboxylate[c] + h2o[c] => 2-oxobutanoate[c] + nh3[c]	3.5.99.7;3.5.99.7	CCM_05164	0	1000			kegg.reaction/R00997	Propanoate and butanoate metabolism		Propanoate and butanoate metabolism		2	ACCAHh	RHEA: http://identifiers.org/rhea/16933; RHEA: http://identifiers.org/rhea/16934; RHEA: http://identifiers.org/rhea/16935; RHEA: http://identifiers.org/rhea/16936; EC Number: http://identifiers.org/ec-code/3.5.99.7; BioCyc: http://identifiers.org/biocyc/META:4.1.99.4-RXN; MetaNetX (MNX) Equation: http://identifiers.org/metanetx.reaction/MNXR95217; KEGG Reaction: http://identifiers.org/kegg.reacti…
	r0072	2-oxobutanoate:[dihydrolipoyllysine-residue propionyltransferase]-lipoyllysine 2-oxidoreductase (decarboxylating, acceptor-propionylating)	2-oxobutanoate[m] + lipoamide-[enzyme][m] => co2[m] + s-propionyldihydrolipoamide-[enzyme][m]	1.2.4.2	CCM_07430	0	1000				Propanoate and butanoate metabolism		Propanoate and butanoate metabolism		2	AKGDam	EC Number: http://identifiers.org/ec-code/1.2.4.2; MetaNetX (MNX) Equation: http://identifiers.org/metanetx.reaction/MNXR95657; SEED Reaction: http://identifiers.org/seed.reaction/rxn01243
	r0073	propionyl-CoA:enzyme N6-(dihydrolipoyl)lysine S-propionyltransferase	coenzyme a[m] + s-propionyldihydrolipoamide-[enzyme][m] => dihydrolipoamide-[enzyme][m] + propionyl-coa[m]	2.3.1.61	CCM_01205	0	1000				Propanoate and butanoate metabolism		Propanoate and butanoate metabolism		2	2OXOADOXm	EC Number: http://identifiers.org/ec-code/1.2.1.52; EC Number: http://identifiers.org/ec-code/1.2.4.2; EC Number: http://identifiers.org/ec-code/1.8.1.4; EC Number: http://identifiers.org/ec-code/2.3.1.61; RHEA: http://identifiers.org/rhea/30795; RHEA: http://identifiers.org/rhea/30796; RHEA: http://identifiers.org/rhea/30797; RHEA: http://identifiers.org/rhea/30798; BioCyc: http://identifiers.or…
	r0074	propanoyl-CoA:oxaloacetate C-propanoyltransferase (thioester-hydrolysing, 1-carboxyethyl-forming)	h2o[m] + oxaloacetate[m] + propionyl-coa[m] => 2-methylcitrate[m] + coenzyme a[m]	2.3.3.5	CCM_05696 or CCM_08876	0	1000			kegg.reaction/R00931	Propanoate and butanoate metabolism		Propanoate and butanoate metabolism		2	MCITSm	EC Number: http://identifiers.org/ec-code/2.3.3.5; RHEA: http://identifiers.org/rhea/23780; RHEA: http://identifiers.org/rhea/23781; RHEA: http://identifiers.org/rhea/23782; RHEA: http://identifiers.org/rhea/23783; BioCyc: http://identifiers.org/biocyc/META:2-METHYLCITRATE-SYNTHASE-RXN; MetaNetX (MNX) Equation: http://identifiers.org/metanetx.reaction/MNXR101417; KEGG Reaction: http://identifiers…
	r0075	2-hydroxybutane-1,2,3-tricarboxylate hydro-lyase	(z)-but-2-ene-1,2,3-tricarboxylate[m] + h2o[m] <=> 2-methylcitrate[m]	4.2.1.79	CCM_00810	-1000	1000			kegg.reaction/R04424	Propanoate and butanoate metabolism		Propanoate and butanoate metabolism		2	MCITD	RHEA: http://identifiers.org/rhea/17725; RHEA: http://identifiers.org/rhea/17726; RHEA: http://identifiers.org/rhea/17727; RHEA: http://identifiers.org/rhea/17728; EC Number: http://identifiers.org/ec-code/4.2.1.79; BioCyc: http://identifiers.org/biocyc/META:2-METHYLCITRATE-DEHYDRATASE-RXN; MetaNetX (MNX) Equation: http://identifiers.org/metanetx.reaction/MNXR101413; KEGG Reaction: http://identif…
	r0076	(2S,3R)-3-hydroxybutane-1,2,3-tricarboxylate pyruvate-lyase (succinate-forming)	methylisocitrate[m] <=> pyruvate[m] + succinate[m]	4.1.3.30	CCM_05551 or CCM_05661	-1000	1000			kegg.reaction/R00409	Propanoate and butanoate metabolism		Propanoate and butanoate metabolism		2	MCITL2m	RHEA: http://identifiers.org/rhea/16809; RHEA: http://identifiers.org/rhea/16810; RHEA: http://identifiers.org/rhea/16811; RHEA: http://identifiers.org/rhea/16812; EC Number: http://identifiers.org/ec-code/4.1.3.30; BioCyc: http://identifiers.org/biocyc/META:METHYLISOCITRATE-LYASE-RXN; MetaNetX (MNX) Equation: http://identifiers.org/metanetx.reaction/MNXR101415; KEGG Reaction: http://identifiers.…
	r0079	(2S,3R)-3-Hydroxybutane-1,2,3-tricarboxylate hydro-lyase	(z)-but-2-ene-1,2,3-tricarboxylate[m] + h2o[m] <=> methylisocitrate[m]	4.2.1.99	CCM_05551 or CCM_05661	-1000	1000			kegg.reaction/R04425	Propanoate and butanoate metabolism		Propanoate and butanoate metabolism		2	MICITDr	RHEA: http://identifiers.org/rhea/17941; RHEA: http://identifiers.org/rhea/17942; RHEA: http://identifiers.org/rhea/17943; RHEA: http://identifiers.org/rhea/17944; EC Number: http://identifiers.org/ec-code/4.2.1.99; BioCyc: http://identifiers.org/biocyc/META:4.2.1.99-RXN; MetaNetX (MNX) Equation: http://identifiers.org/metanetx.reaction/MNXR101580; KEGG Reaction: http://identifiers.org/kegg.react…
	r0080	acetoacetate:CoA ligase (AMP-forming)	acetoacetate[c] + atp[c] + coenzyme a[c] => acetoacetyl-coa[c] + amp[c] + diphosphate[c]	6.2.1.16;6.2.1.16	CCM_03123 or CCM_09462	0	1000			kegg.reaction/R01357	Propanoate and butanoate metabolism		Propanoate and butanoate metabolism		2	AACOAT	RHEA: http://identifiers.org/rhea/16117; RHEA: http://identifiers.org/rhea/16118; RHEA: http://identifiers.org/rhea/16119; RHEA: http://identifiers.org/rhea/16120; EC Number: http://identifiers.org/ec-code/6.2.1.16; BioCyc: http://identifiers.org/biocyc/META:ACETOACETATE--COA-LIGASE-RXN; MetaNetX (MNX) Equation: http://identifiers.org/metanetx.reaction/MNXR95136; Reactome Reaction: http://identif…
	r0081	(S)-3-hydroxybutanoyl-CoA:NADP+ oxidoreductase	3-hydroxybutyryl-coa[m] + nadp(+)[m] <=> acetoacetyl-coa[m] + nadph[m]	1.1.1.157	CCM_03147	-1000	1000			kegg.reaction/R01976	Propanoate and butanoate metabolism		Propanoate and butanoate metabolism		2	HBCO_nadp	EC Number: http://identifiers.org/ec-code/1.1.1.157; EC Number: http://identifiers.org/ec-code/1.1.1.35; RHEA: http://identifiers.org/rhea/16197; RHEA: http://identifiers.org/rhea/16198; RHEA: http://identifiers.org/rhea/16199; RHEA: http://identifiers.org/rhea/16200; BioCyc: http://identifiers.org/biocyc/META:3-HYDROXYBUTYRYL-COA-DEHYDROGENASE-RXN; MetaNetX (MNX) Equation: http://identifiers.org…
	r0082	succinate-semialdehyde:NAD+ oxidoreductase	h2o[m] + nad(+)[m] + succinate semialdehyde[m] => nadh[m] + succinate[m]	1.2.1.24	CCM_01801 or CCM_05410 or CCM_05725	0	1000			kegg.reaction/R00713	Glutamate and glutamine metabolism		Glutamate and glutamine metabolism		2	SSALxm	EC Number: http://identifiers.org/ec-code/1.2.1.16; EC Number: http://identifiers.org/ec-code/1.2.1.24; RHEA: http://identifiers.org/rhea/13217; RHEA: http://identifiers.org/rhea/13218; RHEA: http://identifiers.org/rhea/13219; RHEA: http://identifiers.org/rhea/13220; BioCyc: http://identifiers.org/biocyc/META:SUCCINATE-SEMIALDEHYDE-DEHYDROGENASE-RXN; MetaNetX (MNX) Equation: http://identifiers.or…
	r0083	succinate-semialdehyde:NADP+ oxidoreductase	h2o[m] + nadp(+)[m] + succinate semialdehyde[m] => nadph[m] + succinate[m]	1.2.1.16	CCM_01801 or CCM_05410 or CCM_05725	0	1000			kegg.reaction/R00714	Glutamate and glutamine metabolism		Glutamate and glutamine metabolism		2	SSALy	EC Number: http://identifiers.org/ec-code/1.2.1.16; EC Number: http://identifiers.org/ec-code/1.2.1.79; RHEA: http://identifiers.org/rhea/13213; RHEA: http://identifiers.org/rhea/13214; RHEA: http://identifiers.org/rhea/13215; RHEA: http://identifiers.org/rhea/13216; BioCyc: http://identifiers.org/biocyc/META:SUCCSEMIALDDEHYDROG-RXN; MetaNetX (MNX) Equation: http://identifiers.org/metanetx.reacti…
	r0085	acetyl-CoA:oxaloacetate C-acetyltransferase (thioester-hydrolysing)	acetyl-coa[m] + h2o[m] + oxaloacetate[m] <=> citrate[m] + coenzyme a[m]	2.3.3.1	CCM_05696 or CCM_08876	-1000	1000			kegg.reaction/R00351	Tricarboxylic acid cycle and glyoxylate/dicarboxylate metabolism		Tricarboxylic acid cycle and glyoxylate/dicarboxylate metabolism		2	CS	RHEA: http://identifiers.org/rhea/16845; RHEA: http://identifiers.org/rhea/16846; RHEA: http://identifiers.org/rhea/16847; RHEA: http://identifiers.org/rhea/16848; EC Number: http://identifiers.org/ec-code/2.3.3.1; EC Number: http://identifiers.org/ec-code/2.3.3.16; EC Number: http://identifiers.org/ec-code/2.3.3.3; BioCyc: http://identifiers.org/biocyc/META:CITSYN-RXN; BioCyc: http://identifiers…
	r0086	citrate hydro-lyase (cis-aconitate-forming)	cis-aconitate[m] + h2o[m] <=> citrate[m]	4.2.1.3	CCM_01191 or CCM_01579	-1000	1000			kegg.reaction/R01325	Tricarboxylic acid cycle and glyoxylate/dicarboxylate metabolism		Tricarboxylic acid cycle and glyoxylate/dicarboxylate metabolism		2	ACN_a_m
	r0087	isocitrate hydro-lyase (cis-aconitate-forming)	cis-aconitate[m] + h2o[m] <=> isocitrate[m]	4.2.1.3	CCM_01191 or CCM_01579	-1000	1000			kegg.reaction/R01900	Tricarboxylic acid cycle and glyoxylate/dicarboxylate metabolism		Tricarboxylic acid cycle and glyoxylate/dicarboxylate metabolism		2	ACN_b_m
	r0088	isocitrate:NAD+ oxidoreductase (decarboxylating)	isocitrate[m] + nad(+)[m] => 2-oxoglutarate[m] + co2[m] + nadh[m]	1.1.1.41	(CCM_04171 and CCM_00814)	0	1000			kegg.reaction/R00709	Tricarboxylic acid cycle and glyoxylate/dicarboxylate metabolism		Tricarboxylic acid cycle and glyoxylate/dicarboxylate metabolism		2	ICDHxm	EC Number: http://identifiers.org/ec-code/1.1.1.286; EC Number: http://identifiers.org/ec-code/1.1.1.41; MetaNetX (MNX) Equation: http://identifiers.org/metanetx.reaction/MNXR100782; KEGG Reaction: http://identifiers.org/kegg.reaction/R00709; SEED Reaction: http://identifiers.org/seed.reaction/rxn00505
	r0089	isocitrate:NADP+ oxidoreductase (decarboxylating)	isocitrate[m] + nadp(+)[m] => 2-oxoglutarate[m] + co2[m] + nadph[m]	1.1.1.42	CCM_08506	0	1000			kegg.reaction/R00267	Tricarboxylic acid cycle and glyoxylate/dicarboxylate metabolism		Tricarboxylic acid cycle and glyoxylate/dicarboxylate metabolism		2	ICITRED
	r0090	isocitrate:NADP+ oxidoreductase (decarboxylating)	isocitrate[c] + nadp(+)[c] => 2-oxoglutarate[c] + co2[c] + nadph[c]	1.1.1.42;1.1.1.42	CCM_08506	0	1000			kegg.reaction/R00267	Tricarboxylic acid cycle and glyoxylate/dicarboxylate metabolism		Tricarboxylic acid cycle and glyoxylate/dicarboxylate metabolism		2	ICITRED
	r0091	2-oxoglutarate:[dihydrolipoyllysine-residue succinyltransferase]-lipoyllysine 2-oxidoreductase (decarboxylating, acceptor-succinylating)	2-oxoglutarate[m] + lipoamide-[enzyme][m] => co2[m] + s-succinyldihydrolipoamide-[enzyme][m]	1.2.4.2	CCM_07430	0	1000			kegg.reaction/R01700	Tricarboxylic acid cycle and glyoxylate/dicarboxylate metabolism		Tricarboxylic acid cycle and glyoxylate/dicarboxylate metabolism		2	AKGDam	EC Number: http://identifiers.org/ec-code/1.2.4.2; MetaNetX (MNX) Equation: http://identifiers.org/metanetx.reaction/MNXR95657; SEED Reaction: http://identifiers.org/seed.reaction/rxn01243
	r0092	succinyl-CoA:enzyme N6-(dihydrolipoyl)lysine S-succinyltransferase	coenzyme a[m] + s-succinyldihydrolipoamide-[enzyme][m] => dihydrolipoamide-[enzyme][m] + succinyl-coa[m]	2.3.1.61	CCM_01205	0	1000			kegg.reaction/R02570	Tricarboxylic acid cycle and glyoxylate/dicarboxylate metabolism		Tricarboxylic acid cycle and glyoxylate/dicarboxylate metabolism		2	2OXOADOXm	EC Number: http://identifiers.org/ec-code/1.2.1.52; EC Number: http://identifiers.org/ec-code/1.2.4.2; EC Number: http://identifiers.org/ec-code/1.8.1.4; EC Number: http://identifiers.org/ec-code/2.3.1.61; RHEA: http://identifiers.org/rhea/30795; RHEA: http://identifiers.org/rhea/30796; RHEA: http://identifiers.org/rhea/30797; RHEA: http://identifiers.org/rhea/30798; BioCyc: http://identifiers.or…
	r0093	succinyl-CoA:acetoacetate CoA-transferase	acetoacetate[m] + succinyl-coa[m] => acetoacetyl-coa[m] + succinate[m]	2.8.3.5	(CCM_09153 and CCM_01275)	0	1000			kegg.reaction/R00410	Tricarboxylic acid cycle and glyoxylate/dicarboxylate metabolism		Tricarboxylic acid cycle and glyoxylate/dicarboxylate metabolism		2	OCOAT1	EC Number: http://identifiers.org/ec-code/2.8.3.5; RHEA: http://identifiers.org/rhea/25480; RHEA: http://identifiers.org/rhea/25481; RHEA: http://identifiers.org/rhea/25482; RHEA: http://identifiers.org/rhea/25483; BioCyc: http://identifiers.org/biocyc/META:RXNI-2; MetaNetX (MNX) Equation: http://identifiers.org/metanetx.reaction/MNXR102148; Reactome Reaction: http://identifiers.org/reactome/R-BT…
	r0094	succinate:CoA ligase (GDP-forming)	coenzyme a[m] + gtp[m] + succinate[m] <=> gdp[m] + phosphate[m] + succinyl-coa[m]	6.2.1.4	(CCM_07140 and CCM_05749 and CCM_05757) or (CCM_07140 and CCM_09028)	-1000	1000			kegg.reaction/R00432	Tricarboxylic acid cycle and glyoxylate/dicarboxylate metabolism		Tricarboxylic acid cycle and glyoxylate/dicarboxylate metabolism		2	SUCOAS1m	RHEA: http://identifiers.org/rhea/22120; RHEA: http://identifiers.org/rhea/22121; RHEA: http://identifiers.org/rhea/22122; RHEA: http://identifiers.org/rhea/22123; EC Number: http://identifiers.org/ec-code/6.2.1.4; BioCyc: http://identifiers.org/biocyc/META:SUCCINATE--COA-LIGASE-GDP-FORMING-RXN; MetaNetX (MNX) Equation: http://identifiers.org/metanetx.reaction/MNXR104637; Reactome Reaction: http:…
	r0095	succinate:CoA ligase (ADP-forming)	adp[m] + phosphate[m] + succinyl-coa[m] <=> atp[m] + coenzyme a[m] + succinate[m]	6.2.1.5	(CCM_07140 and CCM_05749) or (CCM_07140 and CCM_09028)	-1000	1000			kegg.reaction/R00405	Tricarboxylic acid cycle and glyoxylate/dicarboxylate metabolism		Tricarboxylic acid cycle and glyoxylate/dicarboxylate metabolism		2	SUCOAS	RHEA: http://identifiers.org/rhea/17661; RHEA: http://identifiers.org/rhea/17662; RHEA: http://identifiers.org/rhea/17663; RHEA: http://identifiers.org/rhea/17664; EC Number: http://identifiers.org/ec-code/6.2.1.5; BioCyc: http://identifiers.org/biocyc/META:SUCCCOASYN-RXN; MetaNetX (MNX) Equation: http://identifiers.org/metanetx.reaction/MNXR104635; Reactome Reaction: http://identifiers.org/react…
	r0096	succinate:(acceptor) oxidoreductase	fadh2[m] + fumarate[m] => fad[m] + succinate[m]	1.3.99.1	CCM_00311 or CCM_07675	0	1000			kegg.reaction/R00408	Tricarboxylic acid cycle and glyoxylate/dicarboxylate metabolism		Tricarboxylic acid cycle and glyoxylate/dicarboxylate metabolism		2	SUCD1	EC Number: http://identifiers.org/ec-code/1.3.5.1; RHEA: http://identifiers.org/rhea/30343; RHEA: http://identifiers.org/rhea/30344; RHEA: http://identifiers.org/rhea/30345; RHEA: http://identifiers.org/rhea/30346; MetaNetX (MNX) Equation: http://identifiers.org/metanetx.reaction/MNXR99636; KEGG Reaction: http://identifiers.org/kegg.reaction/R00408; SEED Reaction: http://identifiers.org/seed.reac…
	r0097	(S)-malate hydro-lyase (fumarate-forming)	(s)-malate[m] <=> fumarate[m] + h2o[m]	4.2.1.2	CCM_03450	-1000	1000			kegg.reaction/R01082	Tricarboxylic acid cycle and glyoxylate/dicarboxylate metabolism		Tricarboxylic acid cycle and glyoxylate/dicarboxylate metabolism		2	FUM	RHEA: http://identifiers.org/rhea/12460; RHEA: http://identifiers.org/rhea/12461; RHEA: http://identifiers.org/rhea/12462; RHEA: http://identifiers.org/rhea/12463; EC Number: http://identifiers.org/ec-code/4.2.1.2; BioCyc: http://identifiers.org/biocyc/META:FUMHYDR-RXN; MetaNetX (MNX) Equation: http://identifiers.org/metanetx.reaction/MNXR99705; Reactome Reaction: http://identifiers.org/reactome/…
	r0098	(S)-malate:NAD+ oxidoreductase	(s)-malate[m] + nad(+)[m] <=> nadh[m] + oxaloacetate[m]	1.1.1.37	CCM_05260 or CCM_05784 or CCM_05876	-1000	1000			kegg.reaction/R00342	Tricarboxylic acid cycle and glyoxylate/dicarboxylate metabolism		Tricarboxylic acid cycle and glyoxylate/dicarboxylate metabolism		2	MDHm	EC Number: http://identifiers.org/ec-code/1.1.1.299; EC Number: http://identifiers.org/ec-code/1.1.1.37; RHEA: http://identifiers.org/rhea/21432; RHEA: http://identifiers.org/rhea/21433; RHEA: http://identifiers.org/rhea/21434; RHEA: http://identifiers.org/rhea/21435; BioCyc: http://identifiers.org/biocyc/META:MALATE-DEH-RXN; MetaNetX (MNX) Equation: http://identifiers.org/metanetx.reaction/MNXR1…
	r0099	(S)-malate:NAD+ oxidoreductase	(s)-malate[c] + nad(+)[c] <=> nadh[c] + oxaloacetate[c]	1.1.1.37	CCM_05260 or CCM_05784 or CCM_05876	-1000	1000			kegg.reaction/R00342	Tricarboxylic acid cycle and glyoxylate/dicarboxylate metabolism		Tricarboxylic acid cycle and glyoxylate/dicarboxylate metabolism		2	MDHm	EC Number: http://identifiers.org/ec-code/1.1.1.299; EC Number: http://identifiers.org/ec-code/1.1.1.37; RHEA: http://identifiers.org/rhea/21432; RHEA: http://identifiers.org/rhea/21433; RHEA: http://identifiers.org/rhea/21434; RHEA: http://identifiers.org/rhea/21435; BioCyc: http://identifiers.org/biocyc/META:MALATE-DEH-RXN; MetaNetX (MNX) Equation: http://identifiers.org/metanetx.reaction/MNXR1…
	r0100	citrate oxaloacetate-lyase (forming acetate from the pro-S carboxymethyl group of citrate)	citrate[c] => acetate[c] + oxaloacetate[c]	4.1.3.6	CCM_06348 and CCM_00209	0	1000			kegg.reaction/R00362	Tricarboxylic acid cycle and glyoxylate/dicarboxylate metabolism		Tricarboxylic acid cycle and glyoxylate/dicarboxylate metabolism		2	CITL	RHEA: http://identifiers.org/rhea/10760; RHEA: http://identifiers.org/rhea/10761; RHEA: http://identifiers.org/rhea/10762; RHEA: http://identifiers.org/rhea/10763; EC Number: http://identifiers.org/ec-code/4.1.3.6; BioCyc: http://identifiers.org/biocyc/META:CITLY-RXN; MetaNetX (MNX) Equation: http://identifiers.org/metanetx.reaction/MNXR96731; KEGG Reaction: http://identifiers.org/kegg.reaction/R…
	r0101	acetyl-CoA:oxaloacetate C-acetyltransferase [(pro-S)-carboxymethyl-forming, ADP-phosphorylating]	atp[c] + citrate[c] + coenzyme a[c] => acetyl-coa[c] + adp[c] + oxaloacetate[c] + phosphate[c]	2.3.3.8;2.3.3.8	(CCM_00210 and CCM_00209)	0	1000			kegg.reaction/R00352	Tricarboxylic acid cycle and glyoxylate/dicarboxylate metabolism		Tricarboxylic acid cycle and glyoxylate/dicarboxylate metabolism		2	ACITL	EC Number: http://identifiers.org/ec-code/2.3.3.8; RHEA: http://identifiers.org/rhea/21160; RHEA: http://identifiers.org/rhea/21161; RHEA: http://identifiers.org/rhea/21162; RHEA: http://identifiers.org/rhea/21163; EC Number: http://identifiers.org/ec-code/4.1.3.6; BioCyc: http://identifiers.org/biocyc/META:ATP-CITRATE-PRO-S--LYASE-RXN; MetaNetX (MNX) Equation: http://identifiers.org/metanetx.rea…
	r0102	acetyl-CoA:glyoxylate C-acetyltransferase (thioester-hydrolysing, carboxymethyl-forming)	acetyl-coa[p] + glyoxylate[p] + h2o[p] => (s)-malate[p] + coenzyme a[p]	2.3.3.9	CCM_03131	0	1000			kegg.reaction/R00472	Tricarboxylic acid cycle and glyoxylate/dicarboxylate metabolism		Tricarboxylic acid cycle and glyoxylate/dicarboxylate metabolism		2	MALS	RHEA: http://identifiers.org/rhea/18181; RHEA: http://identifiers.org/rhea/18182; RHEA: http://identifiers.org/rhea/18183; RHEA: http://identifiers.org/rhea/18184; EC Number: http://identifiers.org/ec-code/2.3.3.9; BioCyc: http://identifiers.org/biocyc/META:MALSYN-RXN; MetaNetX (MNX) Equation: http://identifiers.org/metanetx.reaction/MNXR101347; KEGG Reaction: http://identifiers.org/kegg.reaction…
	r0103	isocitrate glyoxylate-lyase (succinate-forming)	isocitrate[p] => glyoxylate[p] + succinate[p]	4.1.3.1	CCM_05551 or CCM_05661	0	1000			kegg.reaction/R00479	Tricarboxylic acid cycle and glyoxylate/dicarboxylate metabolism		Tricarboxylic acid cycle and glyoxylate/dicarboxylate metabolism		2	ICL	RHEA: http://identifiers.org/rhea/13245; RHEA: http://identifiers.org/rhea/13246; RHEA: http://identifiers.org/rhea/13247; RHEA: http://identifiers.org/rhea/13248; EC Number: http://identifiers.org/ec-code/4.1.3.1; MetaNetX (MNX) Equation: http://identifiers.org/metanetx.reaction/MNXR100789; KEGG Reaction: http://identifiers.org/kegg.reaction/R00479; SEED Reaction: http://identifiers.org/seed.rea…
	r0104	oxaloacetate acetylhydrolase	h2o[c] + oxaloacetate[c] => acetate[c] + oxalate[c]	3.7.1.1	CCM_05734 or CCM_07110	0	1000			kegg.reaction/R00338	Tricarboxylic acid cycle and glyoxylate/dicarboxylate metabolism		Tricarboxylic acid cycle and glyoxylate/dicarboxylate metabolism		2
	r0105	oxalate carboxy-lyase	oxalate[c] => co2[c] + formate[c]	4.1.1.2;4.1.1.2	CCM_00137 or CCM_08723 or CCM_08792	0	1000			kegg.reaction/R00522	Tricarboxylic acid cycle and glyoxylate/dicarboxylate metabolism		Tricarboxylic acid cycle and glyoxylate/dicarboxylate metabolism		2	OXADCm	RHEA: http://identifiers.org/rhea/16509; RHEA: http://identifiers.org/rhea/16510; RHEA: http://identifiers.org/rhea/16511; RHEA: http://identifiers.org/rhea/16512; EC Number: http://identifiers.org/ec-code/4.1.1.2; BioCyc: http://identifiers.org/biocyc/META:OXALATE-DECARBOXYLASE-RXN; MetaNetX (MNX) Equation: http://identifiers.org/metanetx.reaction/MNXR102233; KEGG Reaction: http://identifiers.or…
	r0106	glycolate:NAD+ oxidoreductase	glycolate[p] + nad(+)[p] => glyoxylate[p] + nadh[p]	1.1.1.26;1.1.1.29	CCM_04582 or CCM_07243 or CCM_06143	0	1000			kegg.reaction/R00717	Tricarboxylic acid cycle and glyoxylate/dicarboxylate metabolism		Tricarboxylic acid cycle and glyoxylate/dicarboxylate metabolism		2	GLYCLTDx	EC Number: http://identifiers.org/ec-code/1.1.1.26; EC Number: http://identifiers.org/ec-code/1.1.1.29; EC Number: http://identifiers.org/ec-code/1.1.1.79; RHEA: http://identifiers.org/rhea/18229; RHEA: http://identifiers.org/rhea/18230; RHEA: http://identifiers.org/rhea/18231; RHEA: http://identifiers.org/rhea/18232; BioCyc: http://identifiers.org/biocyc/META:GLYCOLATE-REDUCTASE-RXN; MetaNetX (M…
	r0108	tartrate dehydrogenase	2-hydroxy-3-oxosuccinic acid[c] + nadh[c] <=> nad(+)[c] + tartrate[c]	1.1.1.93	CCM_09493	-1000	1000				Tricarboxylic acid cycle and glyoxylate/dicarboxylate metabolism		Tricarboxylic acid cycle and glyoxylate/dicarboxylate metabolism		2	TARTRDH	EC Number: http://identifiers.org/ec-code/1.1.1.93; RHEA: http://identifiers.org/rhea/15209; RHEA: http://identifiers.org/rhea/15210; RHEA: http://identifiers.org/rhea/15211; RHEA: http://identifiers.org/rhea/15212; BioCyc: http://identifiers.org/biocyc/META:TARTRATE-DEHYDROGENASE-RXN; MetaNetX (MNX) Equation: http://identifiers.org/metanetx.reaction/MNXR104720; KEGG Reaction: http://identifiers.…
	r0109	D-glycerate:NADP+ 2-oxidoreductase	3-hydroxypyruvate[c] + nadph[c] <=> d-glycerate[c] + nadp(+)[c]	1.1.1.81	CCM_06143	-1000	1000			kegg.reaction/R01392	Tricarboxylic acid cycle and glyoxylate/dicarboxylate metabolism		Tricarboxylic acid cycle and glyoxylate/dicarboxylate metabolism		2	HPYRRy	EC Number: http://identifiers.org/ec-code/1.1.1; EC Number: http://identifiers.org/ec-code/1.1.1.79; EC Number: http://identifiers.org/ec-code/1.1.1.81; RHEA: http://identifiers.org/rhea/18657; RHEA: http://identifiers.org/rhea/18658; RHEA: http://identifiers.org/rhea/18659; RHEA: http://identifiers.org/rhea/18660; BioCyc: http://identifiers.org/biocyc/META:RXN0-300; MetaNetX (MNX) Equation: http…
	r0110	formate:NAD+ oxidoreductase	formate[m] + nad(+)[m] => co2[m] + nadh[m]	1.2.1.2	CCM_03045	0	1000			kegg.reaction/R00519	Tricarboxylic acid cycle and glyoxylate/dicarboxylate metabolism		Tricarboxylic acid cycle and glyoxylate/dicarboxylate metabolism		2	FDH	EC Number: http://identifiers.org/ec-code/1.2.1.2; RHEA: http://identifiers.org/rhea/15985; RHEA: http://identifiers.org/rhea/15986; RHEA: http://identifiers.org/rhea/15987; RHEA: http://identifiers.org/rhea/15988; BioCyc: http://identifiers.org/biocyc/META:1.2.1.2-RXN; MetaNetX (MNX) Equation: http://identifiers.org/metanetx.reaction/MNXR99475; KEGG Reaction: http://identifiers.org/kegg.reaction…
	r0112	succinate:(acceptor) oxidoreductase	fumarate[c] + fadh2[m] => succinate[c] + fad[m]	1.3.99.1	CCM_00311 or CCM_07675	0	1000			kegg.reaction/R00408	Tricarboxylic acid cycle and glyoxylate/dicarboxylate metabolism		Tricarboxylic acid cycle and glyoxylate/dicarboxylate metabolism		2	SUCD1	EC Number: http://identifiers.org/ec-code/1.3.5.1; RHEA: http://identifiers.org/rhea/30343; RHEA: http://identifiers.org/rhea/30344; RHEA: http://identifiers.org/rhea/30345; RHEA: http://identifiers.org/rhea/30346; MetaNetX (MNX) Equation: http://identifiers.org/metanetx.reaction/MNXR99636; KEGG Reaction: http://identifiers.org/kegg.reaction/R00408; SEED Reaction: http://identifiers.org/seed.reac…
	r0113	NADH:ubiquinone oxidoreductase	nadh[m] + ubiquinone[m] => nad(+)[m] + ubiquinol[m]	1.6.5.3	(CCM_09437 and CCM_00415 and CCM_00285 and CCM_00400 and CCM_00366 and CCM_04569 and CCM_01193 and CCM_00354 and CCM_01091 and CCM_02651 and CCM_02263 and CCM_02943) or CCM_00400 or CCM_02263 or CCM_03640 or CCM_04569 or CCM_08235 or CCM_08689 or CCM_09676 or CCM_09677	0	1000			kegg.reaction/R02163	Oxidative phosphorylation		Oxidative phosphorylation		2	NADH16pp	EC Number: http://identifiers.org/ec-code/1.6.5.3; MetaNetX (MNX) Equation: http://identifiers.org/metanetx.reaction/MNXR101864; SEED Reaction: http://identifiers.org/seed.reaction/rxn08972
	r0114	diphosphate phosphohydrolase	diphosphate[c] + h2o[c] => 2 phosphate[c]	3.6.1.1	CCM_06284 or CCM_08573	0	1000			kegg.reaction/R00004	Oxidative phosphorylation		Oxidative phosphorylation		2	PPAm	RHEA: http://identifiers.org/rhea/24576; RHEA: http://identifiers.org/rhea/24577; RHEA: http://identifiers.org/rhea/24578; RHEA: http://identifiers.org/rhea/24579; EC Number: http://identifiers.org/ec-code/3.6.1.1; BioCyc: http://identifiers.org/biocyc/META:INORGPYROPHOSPHAT-RXN; MetaNetX (MNX) Equation: http://identifiers.org/metanetx.reaction/MNXR100808; Reactome Reaction: http://identifiers.or…
	r0115	diphosphate phosphohydrolase	diphosphate[m] + h2o[m] => 2 phosphate[m]	3.6.1.1	CCM_06284 or CCM_08573	0	1000			kegg.reaction/R00004	Oxidative phosphorylation		Oxidative phosphorylation		2	PPAm	RHEA: http://identifiers.org/rhea/24576; RHEA: http://identifiers.org/rhea/24577; RHEA: http://identifiers.org/rhea/24578; RHEA: http://identifiers.org/rhea/24579; EC Number: http://identifiers.org/ec-code/3.6.1.1; BioCyc: http://identifiers.org/biocyc/META:INORGPYROPHOSPHAT-RXN; MetaNetX (MNX) Equation: http://identifiers.org/metanetx.reaction/MNXR100808; Reactome Reaction: http://identifiers.or…
	r0117	NADH:ubiquinone oxidoreductase	nadh[c] + 4 h(+) (energy metabolism)[m] + ubiquinone[m] => 4 h(+) (energy metabolism)[c] + nad(+)[c] + ubiquinol[m]	1.6.5.3	(CCM_00415 and CCM_00285 and CCM_00400 and CCM_00366 and CCM_04569 and CCM_01193 and CCM_00354 and CCM_01091 and CCM_02651 and CCM_02263 and CCM_02943) or (CCM_03640 and CCM_08235 and CCM_08689 and CCM_09676 and CCM_09677)	0	1000			kegg.reaction/R02163	Oxidative phosphorylation		Oxidative phosphorylation		2	NADH16pp	EC Number: http://identifiers.org/ec-code/1.6.5.3; MetaNetX (MNX) Equation: http://identifiers.org/metanetx.reaction/MNXR101864; SEED Reaction: http://identifiers.org/seed.reaction/rxn08972
	r0119	NADH:ubiquinone oxidoreductase	4 h(+) (energy metabolism)[m] + nadh[m] + ubiquinone[m] => 4 h(+) (energy metabolism)[c] + nad(+)[m] + ubiquinol[m]	1.6.5.3	(CCM_00415 and CCM_00285 and CCM_00400 and CCM_00366 and CCM_04569 and CCM_01193 and CCM_00354 and CCM_01091 and CCM_02651 and CCM_02263 and CCM_02943) or (CCM_03640 and CCM_08235 and CCM_08689 and CCM_09676 and CCM_09677)	0	1000			kegg.reaction/R02163	Oxidative phosphorylation		Oxidative phosphorylation		2	NADH16pp	EC Number: http://identifiers.org/ec-code/1.6.5.3; MetaNetX (MNX) Equation: http://identifiers.org/metanetx.reaction/MNXR101864; SEED Reaction: http://identifiers.org/seed.reaction/rxn08972
	r0120	NADH:ubiquinone oxidoreductase	nadh[c] + ubiquinone[m] => nad(+)[c] + ubiquinol[m]	1.6.5.3	(CCM_00415 and CCM_00285 and CCM_00400 and CCM_00366 and CCM_04569 and CCM_01193 and CCM_00354 and CCM_01091 and CCM_02651 and CCM_02263 and CCM_02943) or (CCM_03640 and CCM_08235 and CCM_08689 and CCM_09676 and CCM_09677)	0	1000			kegg.reaction/R02163	Oxidative phosphorylation		Oxidative phosphorylation		2	NADH16pp	EC Number: http://identifiers.org/ec-code/1.6.5.3; MetaNetX (MNX) Equation: http://identifiers.org/metanetx.reaction/MNXR101864; SEED Reaction: http://identifiers.org/seed.reaction/rxn08972
	r0122	H+-exporting ATPase	atp[m] + 3.88 h(+) (energy metabolism)[m] + h2o[m] => 3.88 h(+) (energy metabolism)[c] + adp[m] + phosphate[m]	3.6.3.6	(CCM_04179 and CCM_00529) or CCM_03357 or (CCM_07495 and CCM_03228 and CCM_06827 and CCM_08873 and CCM_05187)	0	1000			kegg.reaction/R00086	Oxidative phosphorylation		Oxidative phosphorylation		2	ATPS1	RHEA: http://identifiers.org/rhea/20852#1; RHEA: http://identifiers.org/rhea/20853#1; RHEA: http://identifiers.org/rhea/20854#1; RHEA: http://identifiers.org/rhea/20855#1; EC Number: http://identifiers.org/ec-code/3.6.3.6; BioCyc: http://identifiers.org/biocyc/META:3.6.3.6-RXN; MetaNetX (MNX) Equation: http://identifiers.org/metanetx.reaction/MNXR96133; SEED Reaction: http://identifiers.org/seed.…
	r0123	phospholipid-translocating ATPase	atp[c] + h2o[c] + phospholipids[c] => adp[c] + phosphate[c] + phospholipids[e]	3.6.3.1	CCM_01425 or (CCM_01918 and CCM_03298) or (CCM_03862 and CCM_07800)	0	1000				Oxidative phosphorylation		Oxidative phosphorylation		2
	r0124	NADPH:oxygen oxidoreductase	nadph[c] + o2[c] => h2o2[c] + nadp(+)[c]	1.6.3.1	CCM_08161	0	1000			kegg.reaction/R07172	Oxidative phosphorylation		Oxidative phosphorylation		2	H2O2syn	EC Number: http://identifiers.org/ec-code/1.6.3.1; RHEA: http://identifiers.org/rhea/11260; RHEA: http://identifiers.org/rhea/11261; RHEA: http://identifiers.org/rhea/11262; RHEA: http://identifiers.org/rhea/11263; MetaNetX (MNX) Equation: http://identifiers.org/metanetx.reaction/MNXR100492; Reactome Reaction: http://identifiers.org/reactome/R-ATH-5693681; Reactome Reaction: http://identifiers.or…
	r0125	NADPH dehydrogenase (quinone)	nadph[c] + ubiquinone[m] => nadp(+)[c] + ubiquinol[m]	1.6.99.6	CCM_08161	0	1000				Oxidative phosphorylation		Oxidative phosphorylation		2
	r0126	electron-transferring-flavoprotein dehydrogenase	fadh2[m] + ubiquinone[m] => fad[m] + ubiquinol[m]	1.5.5.1	CCM_04605	0	1000				Oxidative phosphorylation		Oxidative phosphorylation		2
	r0128	H+-transporting two-sector ATPase	3.88 h(+) (energy metabolism)[c] + adp[m] + phosphate[m] => atp[m] + 3.88 h(+) (energy metabolism)[m] + h2o[m]	3.6.3.14	CCM_00383 or (CCM_07426 and CCM_06172 and CCM_04775 and CCM_05296 and CCM_02338 and CCM_02260 and CCM_04226 and CCM_01006) or CCM_02798 or CCM_03228 or CCM_03295 or CCM_03357 or CCM_03392 or CCM_04179 or CCM_04737 or CCM_04775 or CCM_04783 or CCM_05187 or CCM_05394 or CCM_06172 or CCM_06641 or CCM_06692 or CCM_06827 or CCM_07426 or CCM_07495 or CCM_08524	0	1000				Oxidative phosphorylation		Oxidative phosphorylation		2	ATPS4rpp	EC Number: http://identifiers.org/ec-code/3.6.3.14; BioCyc: http://identifiers.org/biocyc/META:ATPSYN-RXN; MetaNetX (MNX) Equation: http://identifiers.org/metanetx.reaction/MNXR96136; SEED Reaction: http://identifiers.org/seed.reaction/rxn08173; SEED Reaction: http://identifiers.org/seed.reaction/rxn10042
	r0129	5,10-methylenetetrahydrofolate:NAD+ oxidoreductase	5,10-methylenetetrahydrofolate[c] + nad(+)[c] => 5,10-methenyltetrahydrofolate[c] + nadh[c]	1.5.1.15;1.5.1.15	CCM_02303	0	1000			kegg.reaction/R01218	Folate biosynthesis		Folate biosynthesis		2	MTHFD2m	EC Number: http://identifiers.org/ec-code/1.5.1.15; RHEA: http://identifiers.org/rhea/22892; RHEA: http://identifiers.org/rhea/22893; RHEA: http://identifiers.org/rhea/22894; RHEA: http://identifiers.org/rhea/22895; MetaNetX (MNX) Equation: http://identifiers.org/metanetx.reaction/MNXR101750; KEGG Reaction: http://identifiers.org/kegg.reaction/R01218
	r0131	5-methyltetrahydrofolate:NADP+ oxidoreductase	5,10-methylenetetrahydrofolate[m] + nadph[m] => 5-methyltetrahydrofolate[m] + nadp(+)[m]	1.5.1.20	CCM_04157 or CCM_05621	0	1000			kegg.reaction/R01224	Folate biosynthesis		Folate biosynthesis		2	MTHFO_nadp	EC Number: http://identifiers.org/ec-code/1.5.1.20; RHEA: http://identifiers.org/rhea/19817; RHEA: http://identifiers.org/rhea/19818; RHEA: http://identifiers.org/rhea/19819; RHEA: http://identifiers.org/rhea/19820; MetaNetX (MNX) Equation: http://identifiers.org/metanetx.reaction/MNXR101752; KEGG Reaction: http://identifiers.org/kegg.reaction/R01224
	r0135	folylpolyglutamate synthetase	atp[c] + l-glutamate[c] + tetrahydrofolate[c] => adp[c] + phosphate[c] + tetrahydrofolyl-(glu)n[c]	6.3.2.17	CCM_04111	0	1000				Folate biosynthesis		Folate biosynthesis		2	FPGS2	MetaNetX (MNX) Equation: http://identifiers.org/metanetx.reaction/MNXR99625
	r0136	GTP 7,8-8,9-dihydrolase	gtp[c] + h2o[c] => 7,8-dihydroneopterin 3'-triphosphate[c] + formate[c]	3.5.4.16	CCM_02050 or CCM_07967	0	1000			kegg.reaction/R00424	Folate biosynthesis		Folate biosynthesis		2	GTPCI_2	RHEA: http://identifiers.org/rhea/17473; RHEA: http://identifiers.org/rhea/17474; RHEA: http://identifiers.org/rhea/17475; RHEA: http://identifiers.org/rhea/17476; EC Number: http://identifiers.org/ec-code/3.5.4.16; BioCyc: http://identifiers.org/biocyc/META:GTP-CYCLOHYDRO-I-RXN; MetaNetX (MNX) Equation: http://identifiers.org/metanetx.reaction/MNXR100453; Reactome Reaction: http://identifiers.or…
	r0137	2-amino-4-hydroxy-6-(erythro-1,2,3-trihydroxypropyl)dihydropteridine triphosphate phosphohydrolase (alkaline optimum)	7,8-dihydroneopterin 3'-triphosphate[c] => 7,8-dihydroneopterin[c] + 3 phosphate[c]	3.1.3.1	CCM_03826 or CCM_05625 or CCM_09478	0	1000			kegg.reaction/R04620	Folate biosynthesis		Folate biosynthesis		2	AKP1_1	EC Number: http://identifiers.org/ec-code/3.1.3.1; MetaNetX (MNX) Equation: http://identifiers.org/metanetx.reaction/MNXR139295; KEGG Reaction: http://identifiers.org/kegg.reaction/R04620; SEED Reaction: http://identifiers.org/seed.reaction/rxn03167
	r0138	2-amino-4-hydroxy-6-(D-erythro-1,2,3-trihydroxypropyl)-7,8-dihydropteridine glycolaldehyde-lyase	7,8-dihydroneopterin[c] => 2-amino-6-(hydroxymethyl)-7,8-dihydropteridin-4-ol[c] + glycolaldehyde[c]	4.1.2.25	CCM_04032	0	1000			kegg.reaction/R03504	Folate biosynthesis		Folate biosynthesis		2	DHNPA2r	RHEA: http://identifiers.org/rhea/10540; RHEA: http://identifiers.org/rhea/10541; RHEA: http://identifiers.org/rhea/10542; RHEA: http://identifiers.org/rhea/10543; EC Number: http://identifiers.org/ec-code/4.1.2.25; BioCyc: http://identifiers.org/biocyc/META:H2NEOPTERINALDOL-RXN; MetaNetX (MNX) Equation: http://identifiers.org/metanetx.reaction/MNXR125603; KEGG Reaction: http://identifiers.org/ke…
	r0139	ATP:2-amino-4-hydroxy-6-hydroxymethyl-7,8-dihydropteridine 6'-pyrophosphotransferase	2-amino-6-(hydroxymethyl)-7,8-dihydropteridin-4-ol[c] + atp[c] => (2-amino-4-hydroxy-7,8-dihydropteridin-6-yl)methyl trihydrogen diphosphate[c] + amp[c]	2.7.6.3;2.7.6.3	CCM_04032	0	1000			kegg.reaction/R03503	Folate biosynthesis		Folate biosynthesis		2	HPPK_1	MetaNetX (MNX) Equation: http://identifiers.org/metanetx.reaction/MNXR138523
	r0140	2-amino-4-hydroxy-6-hydroxymethyl-7,8-dihydropteridine-diphosphate:4-aminobenzoate-2-amino-4-hydroxydihydropteridine-6-methenyltransferase	(2-amino-4-hydroxy-7,8-dihydropteridin-6-yl)methyl trihydrogen diphosphate[c] + 4-aminobenzoate[c] => dihydropteroate[c] + diphosphate[c]	2.5.1.15;2.5.1.15	CCM_04032	0	1000			kegg.reaction/R03067	Folate biosynthesis		Folate biosynthesis		2	DHPS2_1	RHEA: http://identifiers.org/rhea/19949; RHEA: http://identifiers.org/rhea/19950; RHEA: http://identifiers.org/rhea/19951; RHEA: http://identifiers.org/rhea/19952; EC Number: http://identifiers.org/ec-code/2.5.1.15; BioCyc: http://identifiers.org/biocyc/META:H2PTEROATESYNTH-RXN; MetaNetX (MNX) Equation: http://identifiers.org/metanetx.reaction/MNXR140085; KEGG Reaction: http://identifiers.org/keg…
	r0141	2-amino-4-hydroxy-6-hydroxymethyl-7,8-dihydropteridine:4-aminobenzoate-2-amino-4-hydroxydihydropteridine-6-methenyltransferase	2-amino-6-(hydroxymethyl)-7,8-dihydropteridin-4-ol[c] + 4-aminobenzoate[c] => dihydropteroate[c] + h2o[c]	2.5.1.15;2.5.1.15	CCM_04032	0	1000			kegg.reaction/R03066	Folate biosynthesis		Folate biosynthesis		2	DHPS2_1	RHEA: http://identifiers.org/rhea/19949; RHEA: http://identifiers.org/rhea/19950; RHEA: http://identifiers.org/rhea/19951; RHEA: http://identifiers.org/rhea/19952; EC Number: http://identifiers.org/ec-code/2.5.1.15; BioCyc: http://identifiers.org/biocyc/META:H2PTEROATESYNTH-RXN; MetaNetX (MNX) Equation: http://identifiers.org/metanetx.reaction/MNXR140085; KEGG Reaction: http://identifiers.org/keg…
	r0147	10-formyltetrahydrofolate amidohydrolase	10-formyltetrahydrofolate[c] + h2o[c] => formate[c] + tetrahydrofolate[c]	3.5.1.10;3.5.1.10	CCM_09394	0	1000			kegg.reaction/R00944	Folate biosynthesis		Folate biosynthesis		2	FTHFD	RHEA: http://identifiers.org/rhea/19833; RHEA: http://identifiers.org/rhea/19834; RHEA: http://identifiers.org/rhea/19835; RHEA: http://identifiers.org/rhea/19836; EC Number: http://identifiers.org/ec-code/3.5.1.10; MetaNetX (MNX) Equation: http://identifiers.org/metanetx.reaction/MNXR99669; KEGG Reaction: http://identifiers.org/kegg.reaction/R00944
	r0149	5,10-methylenetetrahydrofolate:glycine hydroxymethyltransferase	5,10-methylenetetrahydrofolate[m] + glycine[m] + h2o[m] <=> l-serine[m] + tetrahydrofolate[m]	2.1.2.1	CCM_00764 or CCM_01317	-1000	1000			kegg.reaction/R00945	Folate biosynthesis		Folate biosynthesis		2	GHMT2r	RHEA: http://identifiers.org/rhea/15481; RHEA: http://identifiers.org/rhea/15482; RHEA: http://identifiers.org/rhea/15483; RHEA: http://identifiers.org/rhea/15484; EC Number: http://identifiers.org/ec-code/2.1.2.1; MetaNetX (MNX) Equation: http://identifiers.org/metanetx.reaction/MNXR100142; KEGG Reaction: http://identifiers.org/kegg.reaction/R00945
	r0150	5,10-methylenetetrahydrofolate:glycine hydroxymethyltransferase	5,10-methylenetetrahydrofolate[c] + glycine[c] + h2o[c] <=> l-serine[c] + tetrahydrofolate[c]	2.1.2.1	CCM_00764 or CCM_01317	-1000	1000			kegg.reaction/R00945	Folate biosynthesis		Folate biosynthesis		2	GHMT2r	RHEA: http://identifiers.org/rhea/15481; RHEA: http://identifiers.org/rhea/15482; RHEA: http://identifiers.org/rhea/15483; RHEA: http://identifiers.org/rhea/15484; EC Number: http://identifiers.org/ec-code/2.1.2.1; MetaNetX (MNX) Equation: http://identifiers.org/metanetx.reaction/MNXR100142; KEGG Reaction: http://identifiers.org/kegg.reaction/R00945
	r0151	10-formyltetrahydrofolate:5'-phosphoribosylglycinamide formyltransferase	10-formyltetrahydrofolate[c] + n(1)-(5-phospho-d-ribosyl)glycinamide[c] => n(2)-formyl-n(1)-(5-phospho-d-ribosyl)glycinamide[c] + tetrahydrofolate[c]	2.1.2.2;2.1.2.2	CCM_09067	0	1000			kegg.reaction/R04325	Folate biosynthesis		Folate biosynthesis		2	GARFT	RHEA: http://identifiers.org/rhea/15053; RHEA: http://identifiers.org/rhea/15054; RHEA: http://identifiers.org/rhea/15055; RHEA: http://identifiers.org/rhea/15056; EC Number: http://identifiers.org/ec-code/2.1.2.2; MetaNetX (MNX) Equation: http://identifiers.org/metanetx.reaction/MNXR99623; KEGG Reaction: http://identifiers.org/kegg.reaction/R04325
	r0152	10-formyltetrahydrofolate:5'-phosphoribosylglycinamide formyltransferase	5,10-methenyltetrahydrofolate[c] + h2o[c] + n(1)-(5-phospho-d-ribosyl)glycinamide[c] => n(2)-formyl-n(1)-(5-phospho-d-ribosyl)glycinamide[c] + tetrahydrofolate[c]	2.1.2.2;2.1.2.2	CCM_09067	0	1000			kegg.reaction/R04326	Folate biosynthesis		Folate biosynthesis		2	FGFTh	EC Number: http://identifiers.org/ec-code/2.1.2.2; RHEA: http://identifiers.org/rhea/31131; RHEA: http://identifiers.org/rhea/31132; RHEA: http://identifiers.org/rhea/31133; RHEA: http://identifiers.org/rhea/31134; MetaNetX (MNX) Equation: http://identifiers.org/metanetx.reaction/MNXR99592; KEGG Reaction: http://identifiers.org/kegg.reaction/R04326
	r0155	S-(hydroxymethyl)glutathione dehydrogenase	nad(+)[c] + s-(hydroxymethyl)glutathione[c] => nadh[c] + s-formylglutathione[c]	1.1.1.284;1.1.1.284	CCM_09050	0	1000			kegg.reaction/R06983	Methane metabolism		Methane metabolism		2	FALDH2	EC Number: http://identifiers.org/ec-code/1.1.1; EC Number: http://identifiers.org/ec-code/1.1.1.284; RHEA: http://identifiers.org/rhea/19985; RHEA: http://identifiers.org/rhea/19986; RHEA: http://identifiers.org/rhea/19987; RHEA: http://identifiers.org/rhea/19988; BioCyc: http://identifiers.org/biocyc/META:RXN0-276; MetaNetX (MNX) Equation: http://identifiers.org/metanetx.reaction/MNXR99237; Rea…
	r0156	S-formylglutathione hydrolase	formate[c] + glutathione[c] <=> h2o[c] + s-formylglutathione[c]	3.1.2.12	CCM_01542	-1000	1000			kegg.reaction/R00527	Methane metabolism		Methane metabolism		2	SFGTHi	RHEA: http://identifiers.org/rhea/14961; RHEA: http://identifiers.org/rhea/14962; RHEA: http://identifiers.org/rhea/14963; RHEA: http://identifiers.org/rhea/14964; EC Number: http://identifiers.org/ec-code/3.1.2.12; BioCyc: http://identifiers.org/biocyc/META:S-FORMYLGLUTATHIONE-HYDROLASE-RXN; MetaNetX (MNX) Equation: http://identifiers.org/metanetx.reaction/MNXR104357; Reactome Reaction: http://i…
	r0157	formate:NAD+ oxidoreductase	formate[c] + nad(+)[c] => co2[c] + nadh[c]	1.2.1.2;1.17.1.9	CCM_03045	0	1000			kegg.reaction/R00519	Methane metabolism		Methane metabolism		2	FDH	EC Number: http://identifiers.org/ec-code/1.2.1.2; RHEA: http://identifiers.org/rhea/15985; RHEA: http://identifiers.org/rhea/15986; RHEA: http://identifiers.org/rhea/15987; RHEA: http://identifiers.org/rhea/15988; BioCyc: http://identifiers.org/biocyc/META:1.2.1.2-RXN; MetaNetX (MNX) Equation: http://identifiers.org/metanetx.reaction/MNXR99475; KEGG Reaction: http://identifiers.org/kegg.reaction…
	r0158	D-xylulose-5-phosphate:formaldehyde glycolaldehydetransferase	d-glyceraldehyde 3-phosphate[c] + glycerone[c] <=> d-xylulose 5-phosphate[c] + formaldehyde[c]	2.2.1.3	CCM_00345 or CCM_00667	-1000	1000			kegg.reaction/R01440	Methane metabolism		Methane metabolism		2
	r0159	D-arabinitol:NAD 4-oxidoreductase	d-arabinitol[c] + nad(+)[c] => d-xylulose[c] + nadh[c]	1.1.1.11	CCM_05393 or CCM_06561	0	1000			kegg.reaction/R05604	Pentose and glucuronate interconversions		Pentose and glucuronate interconversions		2	ABTDG	EC Number: http://identifiers.org/ec-code/1.1.1.11; RHEA: http://identifiers.org/rhea/17921; RHEA: http://identifiers.org/rhea/17922; RHEA: http://identifiers.org/rhea/17923; RHEA: http://identifiers.org/rhea/17924; BioCyc: http://identifiers.org/biocyc/META:D-ARABINITOL-4-DEHYDROGENASE-RXN; MetaNetX (MNX) Equation: http://identifiers.org/metanetx.reaction/MNXR95188; KEGG Reaction: http://identif…
	r0160	D-arabitol dehydrogenase	d-arabinitol[c] + nadp(+)[c] => d-xylulose[c] + nadph[c]	1.1.1.11	CCM_05393 or CCM_06561	0	1000				Pentose and glucuronate interconversions		Pentose and glucuronate interconversions		2	ABTDG	EC Number: http://identifiers.org/ec-code/1.1.1.11; RHEA: http://identifiers.org/rhea/17921; RHEA: http://identifiers.org/rhea/17922; RHEA: http://identifiers.org/rhea/17923; RHEA: http://identifiers.org/rhea/17924; BioCyc: http://identifiers.org/biocyc/META:D-ARABINITOL-4-DEHYDROGENASE-RXN; MetaNetX (MNX) Equation: http://identifiers.org/metanetx.reaction/MNXR95188; KEGG Reaction: http://identif…
	r0162	2-deoxy-D-gluconate:NAD+ 3-oxidoreductase	2-deoxy-d-gluconic acid[c] + nad(+)[c] <=> 3-dehydro-2-deoxy-d-gluconate[c] + nadh[c]	1.1.1.125	CCM_06562 or CCM_07943	-1000	1000			kegg.reaction/R04049	Pentose and glucuronate interconversions		Pentose and glucuronate interconversions		2	DGC3D	EC Number: http://identifiers.org/ec-code/1.1.1.125; RHEA: http://identifiers.org/rhea/12160; RHEA: http://identifiers.org/rhea/12161; RHEA: http://identifiers.org/rhea/12162; RHEA: http://identifiers.org/rhea/12163; BioCyc: http://identifiers.org/biocyc/META:KDUD-RXN; MetaNetX (MNX) Equation: http://identifiers.org/metanetx.reaction/MNXR97263; KEGG Reaction: http://identifiers.org/kegg.reaction/…
	r0163	xylitol:NADP+ 4-oxidoreductase (L-xylulose-forming)	l-xylulose[c] + nadph[c] <=> nadp(+)[c] + xylitol[c]	1.1.1.10	CCM_05114 or CCM_06357 or CCM_07859 or CCM_08784 or CCM_09007	-1000	1000			kegg.reaction/R01904	Pentose and glucuronate interconversions		Pentose and glucuronate interconversions		2	XYLUR	EC Number: http://identifiers.org/ec-code/1.1.1.10; RHEA: http://identifiers.org/rhea/17025; RHEA: http://identifiers.org/rhea/17026; RHEA: http://identifiers.org/rhea/17027; RHEA: http://identifiers.org/rhea/17028; BioCyc: http://identifiers.org/biocyc/META:L-XYLULOSE-REDUCTASE-RXN; MetaNetX (MNX) Equation: http://identifiers.org/metanetx.reaction/MNXR138929; Reactome Reaction: http://identifier…
	r0164	xylitol:NAD+ 2-oxidoreductase (D-xylulose-forming)	d-xylulose[c] + nadh[c] <=> nad(+)[c] + xylitol[c]	1.1.1.9	CCM_03621 or CCM_06993	-1000	1000			kegg.reaction/R01896	Pentose and glucuronate interconversions		Pentose and glucuronate interconversions		2	XYLTD_D	EC Number: http://identifiers.org/ec-code/1.1.1.14; EC Number: http://identifiers.org/ec-code/1.1.1.9; RHEA: http://identifiers.org/rhea/20433; RHEA: http://identifiers.org/rhea/20434; RHEA: http://identifiers.org/rhea/20435; RHEA: http://identifiers.org/rhea/20436; BioCyc: http://identifiers.org/biocyc/META:D-XYLULOSE-REDUCTASE-RXN; MetaNetX (MNX) Equation: http://identifiers.org/metanetx.reacti…
	r0165	xylitol:NADP+ oxidoreductase	d-xylose[c] + nadph[c] <=> nadp(+)[c] + xylitol[c]	1.1.1.21	CCM_01682 or CCM_02071 or CCM_03850 or CCM_06364 or CCM_08044 or CCM_04764 or CCM_06321	-1000	1000			kegg.reaction/R01431	Pentose and glucuronate interconversions		Pentose and glucuronate interconversions		2	XYLR	EC Number: http://identifiers.org/ec-code/1.1.1.21; EC Number: http://identifiers.org/ec-code/1.1.1.307; RHEA: http://identifiers.org/rhea/27445; RHEA: http://identifiers.org/rhea/27446; RHEA: http://identifiers.org/rhea/27447; RHEA: http://identifiers.org/rhea/27448; BioCyc: http://identifiers.org/biocyc/META:RXN-8773; MetaNetX (MNX) Equation: http://identifiers.org/metanetx.reaction/MNXR105261;…
	r0166	L-arabinitol:NAD+ 4-oxidoreductase (L-xylulose-forming)	l-arabinitol[c] + nad(+)[c] <=> l-xylulose[c] + nadh[c]	1.1.1.12	CCM_05393 or CCM_06561	-1000	1000			kegg.reaction/R01903	Pentose and glucuronate interconversions		Pentose and glucuronate interconversions		2	ABTD	EC Number: http://identifiers.org/ec-code/1.1.1.12; RHEA: http://identifiers.org/rhea/16381; RHEA: http://identifiers.org/rhea/16382; RHEA: http://identifiers.org/rhea/16383; RHEA: http://identifiers.org/rhea/16384; BioCyc: http://identifiers.org/biocyc/META:L-ARABINITOL-4-DEHYDROGENASE-RXN; MetaNetX (MNX) Equation: http://identifiers.org/metanetx.reaction/MNXR137988; KEGG Reaction: http://identi…
	r0167	aldehyde reductase	d-arabinose[c] + nadph[c] => d-arabinitol[c] + nadp(+)[c]	1.1.1.21	CCM_01682 or CCM_02071 or CCM_03850 or CCM_06364 or CCM_08044 or CCM_04764 or CCM_06321	0	1000				Pentose and glucuronate interconversions		Pentose and glucuronate interconversions		2	RE1342C	EC Number: http://identifiers.org/ec-code/1.1.1.21; MetaNetX (MNX) Equation: http://identifiers.org/metanetx.reaction/MNXR103511
	r0168	L-arabitol:NADP+ 1-oxidoreductase	l-arabinose[c] + nadph[c] => l-arabinitol[c] + nadp(+)[c]	1.1.1.21	CCM_01682 or CCM_02071 or CCM_03850 or CCM_06364 or CCM_08044 or CCM_04764 or CCM_06321	0	1000			kegg.reaction/R01759	Pentose and glucuronate interconversions		Pentose and glucuronate interconversions		2	ALCD22yi	EC Number: http://identifiers.org/ec-code/1.1.1.2; EC Number: http://identifiers.org/ec-code/1.1.1.21; MetaNetX (MNX) Equation: http://identifiers.org/metanetx.reaction/MNXR95717; SEED Reaction: http://identifiers.org/seed.reaction/rxn13223
	r0169	D-arabinose:NAD+ 1-oxidoreductase	d-arabinose[c] + nad(+)[c] => d-arabinono-1,4-lactone[c] + nadh[c]	1.1.1.116;1.1.1.117	CCM_01682 or CCM_03850 or CCM_06364 or CCM_08044	0	1000			kegg.reaction/R01574	Pentose and glucuronate interconversions		Pentose and glucuronate interconversions		2	ARAB1D1	EC Number: http://identifiers.org/ec-code/1.1.1.116; EC Number: http://identifiers.org/ec-code/1.1.1.117; RHEA: http://identifiers.org/rhea/20457; RHEA: http://identifiers.org/rhea/20458; RHEA: http://identifiers.org/rhea/20459; RHEA: http://identifiers.org/rhea/20460; MetaNetX (MNX) Equation: http://identifiers.org/metanetx.reaction/MNXR95907; KEGG Reaction: http://identifiers.org/kegg.reaction/…
	r0170	D-arabinose:NADP+ 1-oxidoreductase	d-arabinose[c] + nadp(+)[c] => d-arabinono-1,4-lactone[c] + nadph[c]	1.1.1.117	CCM_06560	0	1000			kegg.reaction/R01575	Pentose and glucuronate interconversions		Pentose and glucuronate interconversions		2	ARAB1D2	EC Number: http://identifiers.org/ec-code/1.1.1.117; RHEA: http://identifiers.org/rhea/21892; RHEA: http://identifiers.org/rhea/21893; RHEA: http://identifiers.org/rhea/21894; RHEA: http://identifiers.org/rhea/21895; MetaNetX (MNX) Equation: http://identifiers.org/metanetx.reaction/MNXR95908; KEGG Reaction: http://identifiers.org/kegg.reaction/R01575; SEED Reaction: http://identifiers.org/seed.re…
	r0171	ATP:D-xylulose 5-phosphotransferase	atp[c] + d-xylulose[c] => adp[c] + d-xylulose 5-phosphate[c]	2.7.1.17;2.7.1.17	CCM_09684	0	1000			kegg.reaction/R01639	Pentose and glucuronate interconversions		Pentose and glucuronate interconversions		2	XYLK	RHEA: http://identifiers.org/rhea/10964; RHEA: http://identifiers.org/rhea/10965; RHEA: http://identifiers.org/rhea/10966; RHEA: http://identifiers.org/rhea/10967; EC Number: http://identifiers.org/ec-code/2.7.1.17; BioCyc: http://identifiers.org/biocyc/META:XYLULOKIN-RXN; MetaNetX (MNX) Equation: http://identifiers.org/metanetx.reaction/MNXR105255; Reactome Reaction: http://identifiers.org/react…
	r0172	ATP:L-ribulose 5-phosphotransferase	atp[c] + l-ribulose[c] => adp[c] + l-ribulose 5-phosphate[c]	2.7.1.16	CCM_00854	0	1000			kegg.reaction/R02439	Pentose and glucuronate interconversions		Pentose and glucuronate interconversions		2	RBK_L1	EC Number: http://identifiers.org/ec-code/2.7.1.16; RHEA: http://identifiers.org/rhea/22072; RHEA: http://identifiers.org/rhea/22073; RHEA: http://identifiers.org/rhea/22074; RHEA: http://identifiers.org/rhea/22075; BioCyc: http://identifiers.org/biocyc/META:RXN0-5116; MetaNetX (MNX) Equation: http://identifiers.org/metanetx.reaction/MNXR103433; KEGG Reaction: http://identifiers.org/kegg.reaction…
	r0173	L-ribulose-5-phosphate 4-epimerase	d-xylulose 5-phosphate[c] <=> l-ribulose 5-phosphate[c]	5.1.3.4	CCM_00140 or CCM_03486	-1000	1000			kegg.reaction/R05850	Pentose and glucuronate interconversions		Pentose and glucuronate interconversions		2	RBP4E	RHEA: http://identifiers.org/rhea/22368; RHEA: http://identifiers.org/rhea/22369; RHEA: http://identifiers.org/rhea/22370; RHEA: http://identifiers.org/rhea/22371; EC Number: http://identifiers.org/ec-code/5.1.3.4; BioCyc: http://identifiers.org/biocyc/META:RIBULPEPIM-RXN; MetaNetX (MNX) Equation: http://identifiers.org/metanetx.reaction/MNXR103434; KEGG Reaction: http://identifiers.org/kegg.reac…
	r0176	L-iditol:NAD+ 2-oxidoreductase	l-iditol[c] + nad(+)[c] => l-sorbose[c] + nadh[c]	1.1.1.14	CCM_05393 or CCM_09082	0	1000			kegg.reaction/R07145	Mannose/Mannitol, Fructose and Sorbose/Sorbitol metabolism		Mannose/Mannitol, Fructose and Sorbose/Sorbitol metabolism		2	SBTD_L	EC Number: http://identifiers.org/ec-code/1.1.1.14; MetaNetX (MNX) Equation: http://identifiers.org/metanetx.reaction/MNXR104284; SEED Reaction: http://identifiers.org/seed.reaction/rxn09395
	r0177	D-sorbitol dehydrogenase (acceptor)	l-sorbose[c] + nadh[c] => d-sorbitol[c] + nad(+)[c]	1.1.99.21	CCM_06561	0	1000				Mannose/Mannitol, Fructose and Sorbose/Sorbitol metabolism		Mannose/Mannitol, Fructose and Sorbose/Sorbitol metabolism		2	SORD_D	EC Number: http://identifiers.org/ec-code/1.1.99.21; MetaNetX (MNX) Equation: http://identifiers.org/metanetx.reaction/MNXR104476; KEGG Reaction: http://identifiers.org/kegg.reaction/R02925; SEED Reaction: http://identifiers.org/seed.reaction/rxn02092
	r0178	D-mannose-6-phosphate aldose-ketose-isomerase	beta-d-fructofuranose 6-phosphate[c] <=> d-mannose 6-phosphate[c]	5.3.1.8	CCM_09643	-1000	1000			kegg.reaction/R01819	Mannose/Mannitol, Fructose and Sorbose/Sorbitol metabolism		Mannose/Mannitol, Fructose and Sorbose/Sorbitol metabolism		2	MPAKI	EC Number: http://identifiers.org/ec-code/5.3.1.8; BioCyc: http://identifiers.org/biocyc/META:MANNPISOM-RXN; MetaNetX (MNX) Equation: http://identifiers.org/metanetx.reaction/MNXR101382; KEGG Reaction: http://identifiers.org/kegg.reaction/R01819
	r0179	ATP:D-fructose 6-phosphotransferase	atp[c] + d-fructose[c] => adp[c] + beta-d-fructofuranose 6-phosphate[c]	2.7.1.1;2.7.1.1;2.7.1.4	CCM_03320 or CCM_04625 or CCM_06280 or CCM_08316 or CCM_04278	0	1000			kegg.reaction/R00867	Mannose/Mannitol, Fructose and Sorbose/Sorbitol metabolism		Mannose/Mannitol, Fructose and Sorbose/Sorbitol metabolism		2	ABFPT	EC Number: http://identifiers.org/ec-code/2.7.1.1; EC Number: http://identifiers.org/ec-code/2.7.1.4; BioCyc: http://identifiers.org/biocyc/META:FRUCTOKINASE-RXN; MetaNetX (MNX) Equation: http://identifiers.org/metanetx.reaction/MNXR95167; KEGG Reaction: http://identifiers.org/kegg.reaction/R03920
	r0180	D-mannitol-1-phosphate:NAD+ 5-oxidoreductase	beta-d-fructofuranose 6-phosphate[c] + nadh[c] <=> d-mannitol 1-phosphate[c] + nad(+)[c]	1.1.1.17	CCM_09287	-1000	1000			kegg.reaction/R02703	Mannose/Mannitol, Fructose and Sorbose/Sorbitol metabolism		Mannose/Mannitol, Fructose and Sorbose/Sorbitol metabolism		2	M1PD	EC Number: http://identifiers.org/ec-code/1.1.1.17; RHEA: http://identifiers.org/rhea/19661; RHEA: http://identifiers.org/rhea/19662; RHEA: http://identifiers.org/rhea/19663; RHEA: http://identifiers.org/rhea/19664; BioCyc: http://identifiers.org/biocyc/META:MANNPDEHYDROG-RXN; MetaNetX (MNX) Equation: http://identifiers.org/metanetx.reaction/MNXR101311; KEGG Reaction: http://identifiers.org/kegg.…
	r0182	ATP:D-fructose-6-phosphate 2-phosphotransferase	atp[c] + beta-d-fructofuranose 6-phosphate[c] => adp[c] + d-fructose 2,6-bisphosphate[c]	2.7.1.105;2.7.1.105	CCM_03791 or CCM_04416	0	1000			kegg.reaction/R02732	Mannose/Mannitol, Fructose and Sorbose/Sorbitol metabolism		Mannose/Mannitol, Fructose and Sorbose/Sorbitol metabolism		2	PFK26_1	RHEA: http://identifiers.org/rhea/15653; RHEA: http://identifiers.org/rhea/15654; RHEA: http://identifiers.org/rhea/15655; RHEA: http://identifiers.org/rhea/15656; EC Number: http://identifiers.org/ec-code/2.7.1.105; BioCyc: http://identifiers.org/biocyc/META:6-PHOSPHOFRUCTO-2-KINASE-RXN; MetaNetX (MNX) Equation: http://identifiers.org/metanetx.reaction/MNXR102508; KEGG Reaction: http://identifie…
	r0183	beta-D-fructose-2,6-bisphosphate 2-phosphohydrolase	d-fructose 2,6-bisphosphate[c] + h2o[c] => beta-d-fructofuranose 6-phosphate[c] + phosphate[c]	3.1.3.46	CCM_06790	0	1000			kegg.reaction/R02731	Mannose/Mannitol, Fructose and Sorbose/Sorbitol metabolism		Mannose/Mannitol, Fructose and Sorbose/Sorbitol metabolism		2	FBP26	RHEA: http://identifiers.org/rhea/17289; RHEA: http://identifiers.org/rhea/17290; RHEA: http://identifiers.org/rhea/17291; RHEA: http://identifiers.org/rhea/17292; EC Number: http://identifiers.org/ec-code/3.1.3.46; BioCyc: http://identifiers.org/biocyc/META:3.1.3.46-RXN; MetaNetX (MNX) Equation: http://identifiers.org/metanetx.reaction/MNXR99466; KEGG Reaction: http://identifiers.org/kegg.reacti…
	r0184	D-mannose 6-phosphate 1,6-phosphomutase	d-mannose 1-phosphate[c] <=> d-mannose 6-phosphate[c]	5.4.2.8	CCM_01558	-1000	1000			kegg.reaction/R01818	Mannose/Mannitol, Fructose and Sorbose/Sorbitol metabolism		Mannose/Mannitol, Fructose and Sorbose/Sorbitol metabolism		2	PMANM	RHEA: http://identifiers.org/rhea/11140; RHEA: http://identifiers.org/rhea/11141; RHEA: http://identifiers.org/rhea/11142; RHEA: http://identifiers.org/rhea/11143; EC Number: http://identifiers.org/ec-code/5.4.2.8; BioCyc: http://identifiers.org/biocyc/META:PHOSMANMUT-RXN; MetaNetX (MNX) Equation: http://identifiers.org/metanetx.reaction/MNXR101729; Reactome Reaction: http://identifiers.org/react…
	r0187	UDP-glucose glycoprotein glucosyltransferase	gdp-mannose[c] => gdp[c] + mannans[c]	2.4.1.-	CCM_01179	0	1000			kegg.reaction/R00887	Mannose/Mannitol, Fructose and Sorbose/Sorbitol metabolism		Mannose/Mannitol, Fructose and Sorbose/Sorbitol metabolism		2	B3GNT315g_cho	EC Number: http://identifiers.org/ec-code/2.4.1.-; MetaNetX (MNX) Equation: http://identifiers.org/metanetx.reaction/MNXR96184; KEGG Reaction: http://identifiers.org/kegg.reaction/R06097
	r0188	D-glucitol:NAD+ 2-oxidoreductase	d-sorbitol[c] + nad(+)[c] => d-fructose[c] + nadh[c]	1.1.1.14;1.1.1.14;1.1.1.15	CCM_03621 or CCM_05393 or CCM_06561 or CCM_06993 or CCM_09082	0	1000			kegg.reaction/R00875	Mannose/Mannitol, Fructose and Sorbose/Sorbitol metabolism		Mannose/Mannitol, Fructose and Sorbose/Sorbitol metabolism		2	SBTD_D2	EC Number: http://identifiers.org/ec-code/1.1.1.14; EC Number: http://identifiers.org/ec-code/1.1.1.15; RHEA: http://identifiers.org/rhea/33031; RHEA: http://identifiers.org/rhea/33032; RHEA: http://identifiers.org/rhea/33033; RHEA: http://identifiers.org/rhea/33034; BioCyc: http://identifiers.org/biocyc/META:RXN-7644; MetaNetX (MNX) Equation: http://identifiers.org/metanetx.reaction/MNXR104283; …
	r0189	beta-D-mannan hydrolases	h2o[c] + mannans[c] => d-mannose[c]	3.2.1.113;3.2.1.78	CCM_00087 or CCM_08185 or CCM_08733 or CCM_01277 or CCM_02744 or CCM_02902 or CCM_04718	0	1000				Mannose/Mannitol, Fructose and Sorbose/Sorbitol metabolism		Mannose/Mannitol, Fructose and Sorbose/Sorbitol metabolism		2
	r0190	ATP:D-mannose 6-phosphotransferase	atp[c] + d-mannose[c] => adp[c] + d-mannose 6-phosphate[c]	2.7.1.1;2.7.1.1;2.7.1.7	CCM_03320 or CCM_04625 or CCM_06280 or CCM_08316 or CCM_04278	0	1000			kegg.reaction/R01326	Mannose/Mannitol, Fructose and Sorbose/Sorbitol metabolism		Mannose/Mannitol, Fructose and Sorbose/Sorbitol metabolism		2	HEX4	RHEA: http://identifiers.org/rhea/11028; RHEA: http://identifiers.org/rhea/11029; RHEA: http://identifiers.org/rhea/11030; RHEA: http://identifiers.org/rhea/11031; EC Number: http://identifiers.org/ec-code/2.7.1.1; EC Number: http://identifiers.org/ec-code/2.7.1.7; BioCyc: http://identifiers.org/biocyc/META:MANNKIN-RXN; MetaNetX (MNX) Equation: http://identifiers.org/metanetx.reaction/MNXR95795; …
	r0192	sucrose alpha-glucohydrolase	h2o[e] + sucrose[e] => alpha-d-glucose[e] + d-fructose[e]	3.2.1.26	CCM_00448	0	1000			kegg.reaction/R00802	Polysaccharide metabolism (Starch, Cellulose, Chitin, and Xylan)		Polysaccharide metabolism (Starch, Cellulose, Chitin, and Xylan)		2	SAGH	EC Number: http://identifiers.org/ec-code/3.2.1.20; EC Number: http://identifiers.org/ec-code/3.2.1.26; EC Number: http://identifiers.org/ec-code/3.2.1.48; RHEA: http://identifiers.org/rhea/33795; RHEA: http://identifiers.org/rhea/33796; RHEA: http://identifiers.org/rhea/33797; RHEA: http://identifiers.org/rhea/33798; MetaNetX (MNX) Equation: http://identifiers.org/metanetx.reaction/MNXR104242; K…
	r0194	trehalose-6-phosphate phosphohydrolase	alpha,alpha'-trehalose 6-phosphate[c] + h2o[c] => alpha,alpha-trehalose[c] + phosphate[c]	3.1.3.12;3.1.3.12	CCM_01008 or CCM_01167 or CCM_09241	0	1000			kegg.reaction/R02778	Polysaccharide metabolism (Starch, Cellulose, Chitin, and Xylan)		Polysaccharide metabolism (Starch, Cellulose, Chitin, and Xylan)		2	TRE6PP	RHEA: http://identifiers.org/rhea/23420; RHEA: http://identifiers.org/rhea/23421; RHEA: http://identifiers.org/rhea/23422; RHEA: http://identifiers.org/rhea/23423; EC Number: http://identifiers.org/ec-code/3.1.3.12; BioCyc: http://identifiers.org/biocyc/META:TREHALOSEPHOSPHA-RXN; MetaNetX (MNX) Equation: http://identifiers.org/metanetx.reaction/MNXR104926; Reactome Reaction: http://identifiers.or…
	r0195	alpha,alpha-trehalose glucohydrolase	alpha,alpha-trehalose[c] + h2o[c] => 2 d-glucose[c]	3.2.1.28;3.2.1.28	CCM_05550 or CCM_08782 or CCM_01904 or CCM_07064	0	1000			kegg.reaction/R00010	Polysaccharide metabolism (Starch, Cellulose, Chitin, and Xylan)		Polysaccharide metabolism (Starch, Cellulose, Chitin, and Xylan)		2	TREH	RHEA: http://identifiers.org/rhea/20868; RHEA: http://identifiers.org/rhea/20869; RHEA: http://identifiers.org/rhea/20870; RHEA: http://identifiers.org/rhea/20871; EC Number: http://identifiers.org/ec-code/3.2.1.28; MetaNetX (MNX) Equation: http://identifiers.org/metanetx.reaction/MNXR95163; KEGG Reaction: http://identifiers.org/kegg.reaction/R00010; KEGG Reaction: http://identifiers.org/kegg.rea…
	r0196	alpha,alpha-trehalose glucohydrolase	alpha,alpha-trehalose[e] + h2o[e] => 2 d-glucose[e]	3.2.1.28	CCM_01904 or CCM_05550 or CCM_07064 or CCM_08782	0	1000			kegg.reaction/R00010	Polysaccharide metabolism (Starch, Cellulose, Chitin, and Xylan)		Polysaccharide metabolism (Starch, Cellulose, Chitin, and Xylan)		2	TREH	RHEA: http://identifiers.org/rhea/20868; RHEA: http://identifiers.org/rhea/20869; RHEA: http://identifiers.org/rhea/20870; RHEA: http://identifiers.org/rhea/20871; EC Number: http://identifiers.org/ec-code/3.2.1.28; MetaNetX (MNX) Equation: http://identifiers.org/metanetx.reaction/MNXR95163; KEGG Reaction: http://identifiers.org/kegg.reaction/R00010; KEGG Reaction: http://identifiers.org/kegg.rea…
	r0197	maltose glucohydrolase	h2o[c] + maltose[c] => 2 alpha-d-glucose[c]	3.2.1.20	CCM_06740 or CCM_06931 or CCM_08695 or CCM_04926 or CCM_04953 or CCM_07128	0	1000			kegg.reaction/R00028	Polysaccharide metabolism (Starch, Cellulose, Chitin, and Xylan)		Polysaccharide metabolism (Starch, Cellulose, Chitin, and Xylan)		2	MALTly	EC Number: http://identifiers.org/ec-code/3.2.1.20; BioCyc: http://identifiers.org/biocyc/META:RXN-15910; MetaNetX (MNX) Equation: http://identifiers.org/metanetx.reaction/MNXR101350; KEGG Reaction: http://identifiers.org/kegg.reaction/R00028; SEED Reaction: http://identifiers.org/seed.reaction/rxn00022
	r0198	maltose glucohydrolase	h2o[e] + maltose[e] => 2 alpha-d-glucose[e]	3.2.1.20	CCM_06740 or CCM_04926 or CCM_04953 or CCM_06931 or CCM_07128 or CCM_08695	0	1000			kegg.reaction/R00028	Polysaccharide metabolism (Starch, Cellulose, Chitin, and Xylan)		Polysaccharide metabolism (Starch, Cellulose, Chitin, and Xylan)		2	MALTly	EC Number: http://identifiers.org/ec-code/3.2.1.20; BioCyc: http://identifiers.org/biocyc/META:RXN-15910; MetaNetX (MNX) Equation: http://identifiers.org/metanetx.reaction/MNXR101350; KEGG Reaction: http://identifiers.org/kegg.reaction/R00028; SEED Reaction: http://identifiers.org/seed.reaction/rxn00022
	r0199	UDP-glucose:1,3-beta-D-glucan 3-beta-D-glucosyltransferase	udp-glucose[c] => 1,3-beta-d-glucan[c] + udp[c]	2.4.1.34	(CCM_01185 and CCM_03236)	0	1000			kegg.reaction/R03118	Polysaccharide metabolism (Starch, Cellulose, Chitin, and Xylan)		Polysaccharide metabolism (Starch, Cellulose, Chitin, and Xylan)		2
	r0203	beta-glucosidase	cellobiose[c] + h2o[c] => 2 beta-d-glucose[c]	3.2.1.21	CCM_00556 or CCM_02750 or CCM_04729 or CCM_05167 or CCM_07910 or CCM_00791	0	1000				Polysaccharide metabolism (Starch, Cellulose, Chitin, and Xylan)		Polysaccharide metabolism (Starch, Cellulose, Chitin, and Xylan)		2	BGLA	EC Number: http://identifiers.org/ec-code/3.2.1.21; EC Number: http://identifiers.org/ec-code/3.2.1.74; BioCyc: http://identifiers.org/biocyc/META:RXN-10773; MetaNetX (MNX) Equation: http://identifiers.org/metanetx.reaction/MNXR96241; KEGG Reaction: http://identifiers.org/kegg.reaction/R00306; KEGG Reaction: http://identifiers.org/kegg.reaction/R06104
	r0204	beta-glucosidase	cellobiose[e] + h2o[e] => 2 beta-d-glucose[e]	3.2.1.21	CCM_00556 or CCM_02750 or CCM_04729 or CCM_05167 or CCM_07910 or CCM_00791	0	1000				Polysaccharide metabolism (Starch, Cellulose, Chitin, and Xylan)		Polysaccharide metabolism (Starch, Cellulose, Chitin, and Xylan)		2	BGLA	EC Number: http://identifiers.org/ec-code/3.2.1.21; EC Number: http://identifiers.org/ec-code/3.2.1.74; BioCyc: http://identifiers.org/biocyc/META:RXN-10773; MetaNetX (MNX) Equation: http://identifiers.org/metanetx.reaction/MNXR96241; KEGG Reaction: http://identifiers.org/kegg.reaction/R00306; KEGG Reaction: http://identifiers.org/kegg.reaction/R06104
	r0206	1,4-alpha-D-glucan glucohydrolase	glycogen[e] + h2o[e] => alpha-d-glucose[e]	3.2.1.3	CCM_08811	0	1000				Polysaccharide metabolism (Starch, Cellulose, Chitin, and Xylan)		Polysaccharide metabolism (Starch, Cellulose, Chitin, and Xylan)		2
	r0207	1,4-alpha-D-glucan glucohydrolase	h2o[e] + starch[e] => alpha-d-glucose[e]	3.2.1.3	CCM_08811	0	1000			kegg.reaction/R01790	Polysaccharide metabolism (Starch, Cellulose, Chitin, and Xylan)		Polysaccharide metabolism (Starch, Cellulose, Chitin, and Xylan)		2
	r0208	glycogen synthase	glycogenin[c] + udp-glucose[c] => alpha-d-glucosylglycogenin[c] + udp[c]	2.4.1.11;2.4.1.186	(CCM_03736 and CCM_03980)	0	1000			kegg.reaction/R03681	Polysaccharide metabolism (Starch, Cellulose, Chitin, and Xylan)		Polysaccharide metabolism (Starch, Cellulose, Chitin, and Xylan)		2
	r0209	1,4-alpha-glucan branching enzyme	alpha-d-glucosylglycogenin[c] => glycogen[c] + glycogenin[c]	2.4.1.18	CCM_07425	0	1000				Polysaccharide metabolism (Starch, Cellulose, Chitin, and Xylan)		Polysaccharide metabolism (Starch, Cellulose, Chitin, and Xylan)		2	GLDBRAN2	EC Number: http://identifiers.org/ec-code/2.4.1.18; MetaNetX (MNX) Equation: http://identifiers.org/metanetx.reaction/MNXR100155; SEED Reaction: http://identifiers.org/seed.reaction/rxn08605
	r0210	glycogen phosphorylase	maltotetraose[c] + phosphate[c] => alpha-d-glucose 1-phosphate[c] + maltotriose[c]	2.4.1.1	CCM_04198	0	1000				Polysaccharide metabolism (Starch, Cellulose, Chitin, and Xylan)		Polysaccharide metabolism (Starch, Cellulose, Chitin, and Xylan)		2	GLCP	MetaNetX (MNX) Equation: http://identifiers.org/metanetx.reaction/MNXR100214; SEED Reaction: http://identifiers.org/seed.reaction/rxn13299
	r0211	maltose glucohydrolase	h2o[c] + maltotriose[c] => alpha-d-glucose[c] + maltose[c]	3.2.1.20	CCM_04926 or CCM_06740 or CCM_06931 or CCM_08695 or CCM_04953 or CCM_07128	0	1000				Polysaccharide metabolism (Starch, Cellulose, Chitin, and Xylan)		Polysaccharide metabolism (Starch, Cellulose, Chitin, and Xylan)		2	MLTG1	EC Number: http://identifiers.org/ec-code/3.2.1.20; BioCyc: http://identifiers.org/biocyc/META:RXN0-5183; MetaNetX (MNX) Equation: http://identifiers.org/metanetx.reaction/MNXR101619; SEED Reaction: http://identifiers.org/seed.reaction/rxn05746
	r0212	amylo-1,6-glucosidase	maltose[c] + maltotriose[c] => beta-d-glucose[c] + maltotetraose[c]	2.4.1.25	CCM_03522	0	1000				Polysaccharide metabolism (Starch, Cellulose, Chitin, and Xylan)		Polysaccharide metabolism (Starch, Cellulose, Chitin, and Xylan)		2	AMALT3	EC Number: http://identifiers.org/ec-code/2.4.1.25; BioCyc: http://identifiers.org/biocyc/META:RXN-14261; MetaNetX (MNX) Equation: http://identifiers.org/metanetx.reaction/MNXR95802; SEED Reaction: http://identifiers.org/seed.reaction/rxn08128
	r0215	1,3-beta-glucan glucohydrolase	1,3-beta-d-glucan[e] + h2o[e] => alpha-d-glucose[e]	3.2.1.58	CCM_04632 or CCM_00770 or CCM_01183 or CCM_02756 or CCM_03532 or CCM_06947	0	1000			kegg.reaction/R03115	Polysaccharide metabolism (Starch, Cellulose, Chitin, and Xylan)		Polysaccharide metabolism (Starch, Cellulose, Chitin, and Xylan)		2
	r0216	1,4-alpha-D-glucan glucanohydrolase	h2o[c] + starch[c] => alpha-d-glucose[c]	3.2.1.1	CCM_09551 or CCM_08811	0	1000			kegg.reaction/R06209	Polysaccharide metabolism (Starch, Cellulose, Chitin, and Xylan)		Polysaccharide metabolism (Starch, Cellulose, Chitin, and Xylan)		2	AAMYL_1	EC Number: http://identifiers.org/ec-code/3.2.1.1; MetaNetX (MNX) Equation: http://identifiers.org/metanetx.reaction/MNXR95154; SEED Reaction: http://identifiers.org/seed.reaction/rxn09952
	r0217	alpha-amylase	glycogen[c] + h2o[c] => alpha-d-glucose[c]	3.2.1.1	CCM_09551 or CCM_08811	0	1000				Polysaccharide metabolism (Starch, Cellulose, Chitin, and Xylan)		Polysaccharide metabolism (Starch, Cellulose, Chitin, and Xylan)		2	RE0915C	MetaNetX (MNX) Equation: http://identifiers.org/metanetx.reaction/MNXR103479
	r0219	beta-mannosidase	h2o[e] + mannans[e] => d-mannose[e]	3.2.1.25	CCM_03817	0	1000				Polysaccharide metabolism (Starch, Cellulose, Chitin, and Xylan)		Polysaccharide metabolism (Starch, Cellulose, Chitin, and Xylan)		2
	r0224	galactitol:NADP+ 1-oxidoreductase	d-galactose[c] + nadph[c] <=> galactitol[c] + nadp(+)[c]	1.1.1.21	CCM_01682 or CCM_02071 or CCM_03850 or CCM_06364 or CCM_06560 or CCM_08044 or CCM_04764 or CCM_06321	-1000	1000			kegg.reaction/R01095	Galactose metabolism		Galactose metabolism		2	GALOR	EC Number: http://identifiers.org/ec-code/1.1.1.21; RHEA: http://identifiers.org/rhea/37967; RHEA: http://identifiers.org/rhea/37968; RHEA: http://identifiers.org/rhea/37969; RHEA: http://identifiers.org/rhea/37970; BioCyc: http://identifiers.org/biocyc/META:RXN-12078; MetaNetX (MNX) Equation: http://identifiers.org/metanetx.reaction/MNXR100003; KEGG Reaction: http://identifiers.org/kegg.reaction…
	r0225	ATP:D-galactose 1-phosphotransferase	atp[c] + d-galactose[c] => adp[c] + alpha-d-galactose 1-phosphate[c]	2.7.1.6	CCM_00637	0	1000			kegg.reaction/R01092	Galactose metabolism		Galactose metabolism		2	GALKr	RHEA: http://identifiers.org/rhea/13553; RHEA: http://identifiers.org/rhea/13554; RHEA: http://identifiers.org/rhea/13555; RHEA: http://identifiers.org/rhea/13556; EC Number: http://identifiers.org/ec-code/2.7.1.6; BioCyc: http://identifiers.org/biocyc/META:GALACTOKIN-RXN; MetaNetX (MNX) Equation: http://identifiers.org/metanetx.reaction/MNXR99985; KEGG Reaction: http://identifiers.org/kegg.react…
	r0226	UTP:alpha-D-galactose-1-phosphate uridylyltransferase	alpha-d-galactose 1-phosphate[c] + utp[c] <=> diphosphate[c] + udp-d-galactose[c]	2.7.7.10	CCM_09317	-1000	1000			kegg.reaction/R00502	Galactose metabolism		Galactose metabolism		2	GALT	RHEA: http://identifiers.org/rhea/14209; RHEA: http://identifiers.org/rhea/14210; RHEA: http://identifiers.org/rhea/14211; RHEA: http://identifiers.org/rhea/14212; EC Number: http://identifiers.org/ec-code/2.7.7.10; EC Number: http://identifiers.org/ec-code/2.7.7.64; BioCyc: http://identifiers.org/biocyc/META:UTPHEXPURIDYLYLTRANS-RXN; MetaNetX (MNX) Equation: http://identifiers.org/metanetx.react…
	r0227	UDP-glucose 4-epimerase	udp-d-galactose[c] <=> udp-glucose[c]	5.1.3.2	CCM_07583	-1000	1000			kegg.reaction/R00291	Galactose metabolism		Galactose metabolism		2	UDPG4E	RHEA: http://identifiers.org/rhea/22168; RHEA: http://identifiers.org/rhea/22169; RHEA: http://identifiers.org/rhea/22170; RHEA: http://identifiers.org/rhea/22171; EC Number: http://identifiers.org/ec-code/5.1.3.2; BioCyc: http://identifiers.org/biocyc/META:UDPGLUCEPIM-RXN; MetaNetX (MNX) Equation: http://identifiers.org/metanetx.reaction/MNXR143428; Reactome Reaction: http://identifiers.org/reac…
	r0228	UTP:alpha-D-glucose-1-phosphate uridylyltransferase	alpha-d-glucose 1-phosphate[c] + utp[c] <=> diphosphate[c] + udp-glucose[c]	2.7.7.9	CCM_06235	-1000	1000			kegg.reaction/R00289	Galactose metabolism		Galactose metabolism		2	G1PUT_h
	r0229	alpha-D-glucose 1-phosphate 1,6-phosphomutase	alpha-d-glucose 1-phosphate[c] <=> alpha-d-glucose 6-phosphate[c]	5.4.2.2	CCM_02278	-1000	1000			kegg.reaction/R00959	Galactose metabolism		Galactose metabolism		2	PGMTh	RHEA: http://identifiers.org/rhea/23536; RHEA: http://identifiers.org/rhea/23537; RHEA: http://identifiers.org/rhea/23538; RHEA: http://identifiers.org/rhea/23539; EC Number: http://identifiers.org/ec-code/5.4.2.2; EC Number: http://identifiers.org/ec-code/5.4.2.5; MetaNetX (MNX) Equation: http://identifiers.org/metanetx.reaction/MNXR102528; KEGG Reaction: http://identifiers.org/kegg.reaction/R00…
	r0230	UDP-glucose:alpha-D-galactose-1-phosphate uridylyltransferase	alpha-d-galactose 1-phosphate[c] + udp-glucose[c] <=> alpha-d-glucose 1-phosphate[c] + udp-d-galactose[c]	2.7.7.12	CCM_08634 or CCM_09317	-1000	1000			kegg.reaction/R00955	Galactose metabolism		Galactose metabolism		2	UGLT	RHEA: http://identifiers.org/rhea/13989; RHEA: http://identifiers.org/rhea/13990; RHEA: http://identifiers.org/rhea/13991; RHEA: http://identifiers.org/rhea/13992; EC Number: http://identifiers.org/ec-code/2.7.7.12; BioCyc: http://identifiers.org/biocyc/META:GALACTURIDYLYLTRANS-RXN; MetaNetX (MNX) Equation: http://identifiers.org/metanetx.reaction/MNXR143436; Reactome Reaction: http://identifiers…
	r0231	melibiose galactohydrolase	h2o[c] + melibiose[c] => alpha-d-glucose[c] + d-galactose[c]	3.2.1.22	CCM_05073 or CCM_09074	0	1000			kegg.reaction/R01101	Galactose metabolism		Galactose metabolism		2	DGGH	EC Number: http://identifiers.org/ec-code/3.2.1.20; EC Number: http://identifiers.org/ec-code/3.2.1.22; MetaNetX (MNX) Equation: http://identifiers.org/metanetx.reaction/MNXR97317; KEGG Reaction: http://identifiers.org/kegg.reaction/R01101; KEGG Reaction: http://identifiers.org/kegg.reaction/R06091; SEED Reaction: http://identifiers.org/seed.reaction/rxn00817
	r0233	D-galactose:oxygen 6-oxidoreductase	d-galactose[c] + h2o[c] + o2[c] => d-galactonate[c] + h2o2[c]	1.1.3.9	CCM_06213	0	1000			kegg.reaction/R01098	Galactose metabolism		Galactose metabolism		2	GALO	EC Number: http://identifiers.org/ec-code/1.1.3.9; MetaNetX (MNX) Equation: http://identifiers.org/metanetx.reaction/MNXR100002; KEGG Reaction: http://identifiers.org/kegg.reaction/R01098; SEED Reaction: http://identifiers.org/seed.reaction/rxn00814
	r0234	D-tagatose 1,6-bisphosphate D-glyceraldehyde-3-phosphate-lyase (glycerone-phosphate-forming)	d-glyceraldehyde 3-phosphate[c] + glycerone phosphate[c] <=> d-tagatofuranose 1,6-bisphosphate[c]	4.1.2.40	CCM_06361 or CCM_08255	-1000	1000			kegg.reaction/R01069	Galactose metabolism		Galactose metabolism		2	TGBPA	RHEA: http://identifiers.org/rhea/22948; RHEA: http://identifiers.org/rhea/22949; RHEA: http://identifiers.org/rhea/22950; RHEA: http://identifiers.org/rhea/22951; EC Number: http://identifiers.org/ec-code/4.1.2.40; BioCyc: http://identifiers.org/biocyc/META:TAGAALDOL-RXN; MetaNetX (MNX) Equation: http://identifiers.org/metanetx.reaction/MNXR104798; KEGG Reaction: http://identifiers.org/kegg.reac…
	r0235	ATP:D-tagatose-6-phosphate 1-phosphotransferase	adp[c] + d-tagatofuranose 1,6-bisphosphate[c] <=> atp[c] + tagatose 6-phosphate[c]	2.7.1.11	CCM_03725	-1000	1000			kegg.reaction/R03236	Galactose metabolism		Galactose metabolism		2	PFK_2	RHEA: http://identifiers.org/rhea/12420; RHEA: http://identifiers.org/rhea/12421; RHEA: http://identifiers.org/rhea/12422; RHEA: http://identifiers.org/rhea/12423; EC Number: http://identifiers.org/ec-code/2.7.1.11; EC Number: http://identifiers.org/ec-code/2.7.1.144; EC Number: http://identifiers.org/ec-code/2.7.1.56; BioCyc: http://identifiers.org/biocyc/META:TAGAKIN-RXN; MetaNetX (MNX) Equatio…
	r0237	D-galactono-1,4-lactone hydroxyacylhydrolase	d-galactonate[c] <=> d-galactono-1,4-lactone[c] + h2o[c]	3.1.1.25	CCM_07166	-1000	1000			kegg.reaction/R03034	Galactose metabolism		Galactose metabolism		2	GLNLASEer	EC Number: http://identifiers.org/ec-code/3.1.1.17; EC Number: http://identifiers.org/ec-code/3.1.1.25; RHEA: http://identifiers.org/rhea/42516; RHEA: http://identifiers.org/rhea/42517; RHEA: http://identifiers.org/rhea/42518; RHEA: http://identifiers.org/rhea/42519; BioCyc: http://identifiers.org/biocyc/META:RXN-8783; MetaNetX (MNX) Equation: http://identifiers.org/metanetx.reaction/MNXR100250; …
	r0238	D-galactonate hydro-lyase	2-dehydro-3-deoxy-d-galactonate[c] + h2o[c] <=> d-galactonate[c]	4.2.1.6	CCM_04918	-1000	1000			kegg.reaction/R03033	Galactose metabolism		Galactose metabolism		2	GALCTND	RHEA: http://identifiers.org/rhea/18649; RHEA: http://identifiers.org/rhea/18650; RHEA: http://identifiers.org/rhea/18651; RHEA: http://identifiers.org/rhea/18652; EC Number: http://identifiers.org/ec-code/4.2.1.140; EC Number: http://identifiers.org/ec-code/4.2.1.6; BioCyc: http://identifiers.org/biocyc/META:GALACTONDEHYDRAT-RXN; MetaNetX (MNX) Equation: http://identifiers.org/metanetx.reaction/…
	r0239	lactose galactohydrolase	h2o[e] + lactose[e] => alpha-d-glucose[e] + d-galactose[e]	3.2.1.23	CCM_03330 or CCM_03817 or CCM_08698 or CCM_02883 or CCM_08207	0	1000			kegg.reaction/R01678	Galactose metabolism		Galactose metabolism		2	LCGH	EC Number: http://identifiers.org/ec-code/3.2.1.108; EC Number: http://identifiers.org/ec-code/3.2.1.23; MetaNetX (MNX) Equation: http://identifiers.org/metanetx.reaction/MNXR101023; KEGG Reaction: http://identifiers.org/kegg.reaction/R01678; KEGG Reaction: http://identifiers.org/kegg.reaction/R06098
	r0240	lactose galactohydrolase	h2o[c] + lactose[c] => alpha-d-glucose[c] + d-galactose[c]	3.2.1.23	CCM_03817 or CCM_02883 or CCM_03330 or CCM_08207 or CCM_08698	0	1000			kegg.reaction/R01678	Galactose metabolism		Galactose metabolism		2	LCGH	EC Number: http://identifiers.org/ec-code/3.2.1.108; EC Number: http://identifiers.org/ec-code/3.2.1.23; MetaNetX (MNX) Equation: http://identifiers.org/metanetx.reaction/MNXR101023; KEGG Reaction: http://identifiers.org/kegg.reaction/R01678; KEGG Reaction: http://identifiers.org/kegg.reaction/R06098
	r0241	raffinose fructohydrolase	h2o[e] + raffinose[e] => d-fructose[e] + melibiose[e]	3.2.1.26	CCM_00448	0	1000			kegg.reaction/R02410	Galactose metabolism		Galactose metabolism		2	RFH	MetaNetX (MNX) Equation: http://identifiers.org/metanetx.reaction/MNXR138790
	r0242	sn-glycerol-3-phosphate phosphohydrolase	glycerol 3-phosphate[c] + h2o[c] => glycerol[c] + phosphate[c]	3.1.3.21;3.1.3.21	CCM_06603	0	1000			kegg.reaction/R00841	Glycerolipid biosynthesis		Glycerolipid biosynthesis		2	G3PT	EC Number: http://identifiers.org/ec-code/3.1.3.2; EC Number: http://identifiers.org/ec-code/3.1.3.21; BioCyc: http://identifiers.org/biocyc/META:RXN-14965; MetaNetX (MNX) Equation: http://identifiers.org/metanetx.reaction/MNXR99894; KEGG Reaction: http://identifiers.org/kegg.reaction/R00841; SEED Reaction: http://identifiers.org/seed.reaction/rxn00610
	r0243	1,2-diacyl-sn-glycerol 3-phosphate phosphohydrolase	h2o[c] + phosphatidate[c] => diacylglycerol[c] + phosphate[c]	3.1.3.4	CCM_01708	0	1000			kegg.reaction/R02239	Glycerolipid biosynthesis		Glycerolipid biosynthesis		2	PAPA160	EC Number: http://identifiers.org/ec-code/3.1.3.4; MetaNetX (MNX) Equation: http://identifiers.org/metanetx.reaction/MNXR102350
	r0245	phosphatidate phosphatase	h2o[c] + acylglycerol 3-phosphate[c] => acylglycerol[c] + phosphate[c]	3.1.3.4	CCM_01708	0	1000				Glycerolipid biosynthesis		Glycerolipid biosynthesis		2	PAPA_EC	MetaNetX (MNX) Equation: http://identifiers.org/metanetx.reaction/MNXR143264
	r0246	1-acylglycerol-3-phosphate acyltransferase	acyl-[acp][c] + diacylglycerol[c] => acyl-carrier protein[c] + triacylglycerol[c]	2.3.1.20	CCM_06662 or CCM_02787	0	1000				Glycerolipid biosynthesis		Glycerolipid biosynthesis		2
	r0247	triacylglycerol acylhydrolase	h2o[c] + triacylglycerol[c] => diacylglycerol[c] + free fatty acids[c]	3.1.1.3	CCM_00456 or CCM_03413 or CCM_05287 or CCM_08967 or CCM_00581 or CCM_00909 or CCM_01925 or CCM_02982 or CCM_03046 or CCM_06112 or CCM_06233 or CCM_06959 or CCM_07909 or CCM_08202 or CCM_08435 or CCM_09089 or CCM_09389 or CCM_09597	0	1000			kegg.reaction/R01369	Glycerolipid biosynthesis		Glycerolipid biosynthesis		2
	r0248	1,2-diacyl-sn-glycerol acylhydrolase	diacylglycerol[c] + h2o[c] => free fatty acids[c] + acylglycerol[c]	3.1.1.3	CCM_00456 or CCM_03413 or CCM_05287 or CCM_08967 or CCM_00581 or CCM_00909 or CCM_01925 or CCM_02982 or CCM_03046 or CCM_06112 or CCM_06233 or CCM_06959 or CCM_07909 or CCM_08202 or CCM_08435 or CCM_09089 or CCM_09389 or CCM_09597	0	1000			kegg.reaction/R02687	Glycerolipid biosynthesis		Glycerolipid biosynthesis		2
	r0251	glycerol:NAD+ 2-oxidoreductase	glycerol[c] + nad(+)[c] => glycerone[c] + nadh[c]	1.1.1.6	CCM_06560	0	1000			kegg.reaction/R01034	Glycerolipid biosynthesis		Glycerolipid biosynthesis		2	GLYCDx	EC Number: http://identifiers.org/ec-code/1.1.1.6; RHEA: http://identifiers.org/rhea/13769; RHEA: http://identifiers.org/rhea/13770; RHEA: http://identifiers.org/rhea/13771; RHEA: http://identifiers.org/rhea/13772; BioCyc: http://identifiers.org/biocyc/META:GLYCDEH-RXN; MetaNetX (MNX) Equation: http://identifiers.org/metanetx.reaction/MNXR100326; KEGG Reaction: http://identifiers.org/kegg.reactio…
	r0252	glycerol dehydrogenase (NADP)	glycerone[c] + nadph[c] => glycerol[c] + nadp(+)[c]	1.1.1.72	CCM_01682 or CCM_06560 or CCM_08044	0	1000				Glycerolipid biosynthesis		Glycerolipid biosynthesis		2	ALCD19y	EC Number: http://identifiers.org/ec-code/1.1.1.2; EC Number: http://identifiers.org/ec-code/1.1.1.21; EC Number: http://identifiers.org/ec-code/1.1.1.372; EC Number: http://identifiers.org/ec-code/1.1.1.72; RHEA: http://identifiers.org/rhea/23592; RHEA: http://identifiers.org/rhea/23593; RHEA: http://identifiers.org/rhea/23594; RHEA: http://identifiers.org/rhea/23595; BioCyc: http://identifiers.…
	r0255	NAD-dependent alcohol dehydrogenase	d-glyceraldehyde[c] + nadh[c] => glycerol[c] + nad(+)[c]	1.1.1.1	CCM_00356 or CCM_02484 or CCM_07377 or CCM_00451 or CCM_03363 or CCM_04357 or CCM_04723 or CCM_05747 or CCM_05807 or CCM_07863 or CCM_08262 or CCM_08721	0	1000				Glycerolipid biosynthesis		Glycerolipid biosynthesis		2	RE1711C_2	EC Number: http://identifiers.org/ec-code/1.1.1.1; BioCyc: http://identifiers.org/biocyc/META:RXN-10781; MetaNetX (MNX) Equation: http://identifiers.org/metanetx.reaction/MNXR103538
	r0256	glycerol:NADP+ oxidoreductase	d-glyceraldehyde[c] + nadph[c] => glycerol[c] + nadp(+)[c]	1.1.1.2	CCM_01806 or CCM_02761 or CCM_07382 or CCM_08946 or CCM_03437	0	1000			kegg.reaction/R01041	Glycerolipid biosynthesis		Glycerolipid biosynthesis		2	ALCD19y	EC Number: http://identifiers.org/ec-code/1.1.1.2; EC Number: http://identifiers.org/ec-code/1.1.1.21; EC Number: http://identifiers.org/ec-code/1.1.1.372; EC Number: http://identifiers.org/ec-code/1.1.1.72; RHEA: http://identifiers.org/rhea/23592; RHEA: http://identifiers.org/rhea/23593; RHEA: http://identifiers.org/rhea/23594; RHEA: http://identifiers.org/rhea/23595; BioCyc: http://identifiers.…
	r0257	ATP:glycerol 3-phosphotransferase	atp[c] + glycerol[c] => adp[c] + glycerol 3-phosphate[c]	2.7.1.30;2.7.1.30	CCM_01737	0	1000			kegg.reaction/R00847	Glycerolipid biosynthesis		Glycerolipid biosynthesis		2	GLYK	EC Number: http://identifiers.org/ec-code/2.7.1.30; RHEA: http://identifiers.org/rhea/21644; RHEA: http://identifiers.org/rhea/21645; RHEA: http://identifiers.org/rhea/21646; RHEA: http://identifiers.org/rhea/21647; BioCyc: http://identifiers.org/biocyc/META:GLYCEROL-KIN-RXN; MetaNetX (MNX) Equation: http://identifiers.org/metanetx.reaction/MNXR100348; Reactome Reaction: http://identifiers.org/re…
	r0259	palmitoyl-CoA:L-serine C-palmitoyltransferase (decarboxylating)	l-serine[c] + palmitoyl-coa[c] => 3-dehydrosphinganine[c] + co2[c] + coenzyme a[c]	2.3.1.50;2.3.1.50	CCM_01184 or CCM_09427	0	1000			kegg.reaction/R01281	Sphingolipid biosynthesis		Sphingolipid biosynthesis		2	SERPT	RHEA: http://identifiers.org/rhea/14761; RHEA: http://identifiers.org/rhea/14762; RHEA: http://identifiers.org/rhea/14763; RHEA: http://identifiers.org/rhea/14764; EC Number: http://identifiers.org/ec-code/2.3.1.50; BioCyc: http://identifiers.org/biocyc/META:SERINE-C-PALMITOYLTRANSFERASE-RXN; MetaNetX (MNX) Equation: http://identifiers.org/metanetx.reaction/MNXR104347; KEGG Reaction: http://ident…
	r0260	sphinganine:NADP+ 3-oxidoreductase	3-dehydrosphinganine[c] + nadph[c] => nadp(+)[c] + sphinganine[c]	1.1.1.102	CCM_01666	0	1000			kegg.reaction/R02978	Sphingolipid biosynthesis		Sphingolipid biosynthesis		2	3DSPHR	EC Number: http://identifiers.org/ec-code/1.1.1.102; RHEA: http://identifiers.org/rhea/22640; RHEA: http://identifiers.org/rhea/22641; RHEA: http://identifiers.org/rhea/22642; RHEA: http://identifiers.org/rhea/22643; BioCyc: http://identifiers.org/biocyc/META:3-DEHYDROSPHINGANINE-REDUCTASE-RXN; MetaNetX (MNX) Equation: http://identifiers.org/metanetx.reaction/MNXR94866; KEGG Reaction: http://iden…
	r0261	sphingosine hydroxylase/ syringomycin response protein 2	nadph[c] + o2[c] + sphinganine[c] => nadp(+)[c] + phytosphingosine[c]	1.-.-.-	CCM_01623	0	1000				Sphingolipid biosynthesis		Sphingolipid biosynthesis		2	BSORy	EC Number: http://identifiers.org/ec-code/1.-.-.-; RHEA: http://identifiers.org/rhea/30535; RHEA: http://identifiers.org/rhea/30536; RHEA: http://identifiers.org/rhea/30537; RHEA: http://identifiers.org/rhea/30538; MetaNetX (MNX) Equation: http://identifiers.org/metanetx.reaction/MNXR96326; KEGG Reaction: http://identifiers.org/kegg.reaction/R10127; SEED Reaction: http://identifiers.org/seed.reac…
	r0262	serine C-palmitoyltransferase	l-serine[c] + stearoyl-coa[c] => 3-dehydrosphinganine[c] + co2[c] + coenzyme a[c]	2.3.1.50	CCM_09427 or CCM_01184	0	1000				Sphingolipid biosynthesis		Sphingolipid biosynthesis		2	SERPTr
	r0263	sphinganine:NADP+ 3-oxidoreductase	3-dehydrosphinganine[c] + nadph[c] => nadp(+)[c] + sphinganine[c]	1.1.1.102	CCM_01666	0	1000			kegg.reaction/R02978	Sphingolipid biosynthesis		Sphingolipid biosynthesis		2	3DSPHR	EC Number: http://identifiers.org/ec-code/1.1.1.102; RHEA: http://identifiers.org/rhea/22640; RHEA: http://identifiers.org/rhea/22641; RHEA: http://identifiers.org/rhea/22642; RHEA: http://identifiers.org/rhea/22643; BioCyc: http://identifiers.org/biocyc/META:3-DEHYDROSPHINGANINE-REDUCTASE-RXN; MetaNetX (MNX) Equation: http://identifiers.org/metanetx.reaction/MNXR94866; KEGG Reaction: http://iden…
	r0264	sphingosine hydroxylase/ syringomycin response protein 2	nadph[c] + o2[c] + sphinganine[c] => nadp(+)[c] + phytosphingosine[c]	1.-.-.-	CCM_01623	0	1000				Sphingolipid biosynthesis		Sphingolipid biosynthesis		2	BSORy	EC Number: http://identifiers.org/ec-code/1.-.-.-; RHEA: http://identifiers.org/rhea/30535; RHEA: http://identifiers.org/rhea/30536; RHEA: http://identifiers.org/rhea/30537; RHEA: http://identifiers.org/rhea/30538; MetaNetX (MNX) Equation: http://identifiers.org/metanetx.reaction/MNXR96326; KEGG Reaction: http://identifiers.org/kegg.reaction/R10127; SEED Reaction: http://identifiers.org/seed.reac…
	r0265	serine C-palmitoyltransferase	heptadecenoyl-coa[c] + l-serine[c] => 3-dehydrosphinganine[c] + co2[c] + coenzyme a[c]	2.3.1.50	CCM_09427 or CCM_01184	0	1000				Sphingolipid biosynthesis		Sphingolipid biosynthesis		2	SERPTr
	r0266	sphinganine:NADP+ 3-oxidoreductase	3-dehydrosphinganine[c] + nadph[c] => nadp(+)[c] + sphinganine[c]	1.1.1.102	CCM_01666	0	1000			kegg.reaction/R02978	Sphingolipid biosynthesis		Sphingolipid biosynthesis		2	3DSPHR	EC Number: http://identifiers.org/ec-code/1.1.1.102; RHEA: http://identifiers.org/rhea/22640; RHEA: http://identifiers.org/rhea/22641; RHEA: http://identifiers.org/rhea/22642; RHEA: http://identifiers.org/rhea/22643; BioCyc: http://identifiers.org/biocyc/META:3-DEHYDROSPHINGANINE-REDUCTASE-RXN; MetaNetX (MNX) Equation: http://identifiers.org/metanetx.reaction/MNXR94866; KEGG Reaction: http://iden…
	r0267	ceramide synthase	phytosphingosine[c] + stearoyl-coa[c] => cerebrin[c] + coenzyme a[c]	2.3.1.24	CCM_00967	0	1000				Sphingolipid biosynthesis		Sphingolipid biosynthesis		2
	r0268	ceramide synthase	oleoyl-coa[c] + phytosphingosine[c] => cerebrin[c] + coenzyme a[c]	2.3.1.24	CCM_00967	0	1000				Sphingolipid biosynthesis		Sphingolipid biosynthesis		2
	r0269	ceramide synthase	phytosphingosine[c] + stearoyl-coa[c] => cerebrin[c] + coenzyme a[c]	2.3.1.24	CCM_00967	0	1000				Sphingolipid biosynthesis		Sphingolipid biosynthesis		2
	r0270	ceramide synthase	oleoyl-coa[c] + phytosphingosine[c] => cerebrin[c] + coenzyme a[c]	2.3.1.24	CCM_00967	0	1000				Sphingolipid biosynthesis		Sphingolipid biosynthesis		2
	r0272	ceramide synthase	sphinganine[c] + stearoyl-coa[c] => cerebrin[c] + coenzyme a[c]	2.3.1.24	CCM_00967	0	1000				Sphingolipid biosynthesis		Sphingolipid biosynthesis		2
	r0273	ceramide synthase	oleoyl-coa[c] + sphinganine[c] => cerebrin[c] + coenzyme a[c]	2.3.1.24	CCM_00967	0	1000				Sphingolipid biosynthesis		Sphingolipid biosynthesis		2
	r0274	ceramide synthase	sphinganine[c] + stearoyl-coa[c] => cerebrin[c] + coenzyme a[c]	2.3.1.24	CCM_00967	0	1000				Sphingolipid biosynthesis		Sphingolipid biosynthesis		2
	r0275	ceramide synthase	oleoyl-coa[c] + sphinganine[c] => cerebrin[c] + coenzyme a[c]	2.3.1.24	CCM_00967	0	1000				Sphingolipid biosynthesis		Sphingolipid biosynthesis		2
	r0280	ceramide synthase	sphinganine[c] + stearoyl-coa[c] => cerebroside[c] + coenzyme a[c]	2.3.1.24	CCM_00967	0	1000				Sphingolipid biosynthesis		Sphingolipid biosynthesis		2
	r0281	2-hydroxyacylsphingosine 1-beta-glucosyltransferase	cerebroside[c] + udp-glucose[c] => glucocerebroside[c] + udp[c]	2.4.1.80	CCM_09521	0	1000				Sphingolipid biosynthesis		Sphingolipid biosynthesis		2	UGCG_cho	EC Number: http://identifiers.org/ec-code/2.4.1.80; BioCyc: http://identifiers.org/biocyc/META:RXN-18272; MetaNetX (MNX) Equation: http://identifiers.org/metanetx.reaction/MNXR143435; KEGG Reaction: http://identifiers.org/kegg.reaction/R01497; KEGG Reaction: http://identifiers.org/kegg.reaction/R06275; SEED Reaction: http://identifiers.org/seed.reaction/rxn01088
	r0282	ceramide synthase	oleoyl-coa[c] + sphinganine[c] => cerebroside[c] + coenzyme a[c]	2.3.1.24	CCM_00967	0	1000				Sphingolipid biosynthesis		Sphingolipid biosynthesis		2
	r0283	2-hydroxyacylsphingosine 1-beta-glucosyltransferase	cerebroside[c] + udp-glucose[c] => glucocerebroside[c] + udp[c]	2.4.1.80	CCM_09521	0	1000				Sphingolipid biosynthesis		Sphingolipid biosynthesis		2	UGCG_cho	EC Number: http://identifiers.org/ec-code/2.4.1.80; BioCyc: http://identifiers.org/biocyc/META:RXN-18272; MetaNetX (MNX) Equation: http://identifiers.org/metanetx.reaction/MNXR143435; KEGG Reaction: http://identifiers.org/kegg.reaction/R01497; KEGG Reaction: http://identifiers.org/kegg.reaction/R06275; SEED Reaction: http://identifiers.org/seed.reaction/rxn01088
	r0284	IPC synthase, mannosyl diphosphorylinositol ceramide synthase	1-phosphatidyl-1d-myo-inositols[c] + cerebrin[c] => inositol phosphorylceramide[c]	2.-.-.-	CCM_01312	0	1000				Sphingolipid biosynthesis		Sphingolipid biosynthesis		2	HEPT2	EC Number: http://identifiers.org/ec-code/2; RHEA: http://identifiers.org/rhea/28538; RHEA: http://identifiers.org/rhea/28539; RHEA: http://identifiers.org/rhea/28540; RHEA: http://identifiers.org/rhea/28541; BioCyc: http://identifiers.org/biocyc/META:RXN0-5061; MetaNetX (MNX) Equation: http://identifiers.org/metanetx.reaction/MNXR100604; SEED Reaction: http://identifiers.org/seed.reaction/rxn087…
	r0287	galactosyltransferase	di-mannosyl-inositol-p-ceramide[c] + udp-d-galactose[c] => galactosyl-dimannosyl-inositol-p-ceramide[c] + udp[c]	2.4.1.-	CCM_05446	0	1000				Sphingolipid biosynthesis		Sphingolipid biosynthesis		2	B3GNT315g_cho	EC Number: http://identifiers.org/ec-code/2.4.1.-; MetaNetX (MNX) Equation: http://identifiers.org/metanetx.reaction/MNXR96184; KEGG Reaction: http://identifiers.org/kegg.reaction/R06097
	r0288	galactosyltransferase	galactosyl-dimannosyl-inositol-p-ceramide[c] + udp-d-galactose[c] => digalactosyl-dimannosyl-inositol-p-ceramide[c] + udp[c]	2.4.1.-	CCM_05446	0	1000				Sphingolipid biosynthesis		Sphingolipid biosynthesis		2	B3GNT315g_cho	EC Number: http://identifiers.org/ec-code/2.4.1.-; MetaNetX (MNX) Equation: http://identifiers.org/metanetx.reaction/MNXR96184; KEGG Reaction: http://identifiers.org/kegg.reaction/R06097
	r0289	galactosyltransferase	digalactosyl-dimannosyl-inositol-p-ceramide[c] + udp-d-galactose[c] => trigalactosyldimannosylinositol-p-ceramide[c] + udp[c]	2.4.1.-	CCM_05446	0	1000				Sphingolipid biosynthesis		Sphingolipid biosynthesis		2	B3GNT315g_cho	EC Number: http://identifiers.org/ec-code/2.4.1.-; MetaNetX (MNX) Equation: http://identifiers.org/metanetx.reaction/MNXR96184; KEGG Reaction: http://identifiers.org/kegg.reaction/R06097
	r0290	glycerol-3-phosphate acyltransferase	acyl-[acp][c] + glycerol 3-phosphate[c] => acyl-carrier protein[c] + acylglycerol 3-phosphate[c]	2.3.1.15	CCM_01745 or CCM_05062	0	1000				Glycerophospholipid biosynthesis		Glycerophospholipid biosynthesis		2	GPAMm_hs	MetaNetX (MNX) Equation: http://identifiers.org/metanetx.reaction/MNXR138489
	r0291	glycerol-3-phosphate acyltransferase	acyl-[acp][c] + glycerone phosphate[c] => 1-acylglycerone 3-phosphate[c] + acyl-carrier protein[c]	2.3.1.15	CCM_01745 or CCM_05062	0	1000				Glycerophospholipid biosynthesis		Glycerophospholipid biosynthesis		2	GPAMm_hs	MetaNetX (MNX) Equation: http://identifiers.org/metanetx.reaction/MNXR138489
	r0293	CTP:phosphatidate cytidyltransferase	cdp-diacylglycerol[c] + diphosphate[c] <=> ctp[c] + phosphatidate[c]	2.7.7.41	CCM_01859 or CCM_07706	-1000	1000			kegg.reaction/R01799	Glycerophospholipid biosynthesis		Glycerophospholipid biosynthesis		2	DASYN140	EC Number: http://identifiers.org/ec-code/2.7.7.41; MetaNetX (MNX) Equation: http://identifiers.org/metanetx.reaction/MNXR97155; SEED Reaction: http://identifiers.org/seed.reaction/rxn08307
	r0294	CDP-diacylglycerol:L-serine 3-phosphatidyltransferase	cdp-diacylglycerol[c] + l-serine[c] <=> cmp[c] + phosphatidylserine[c]	2.7.8.8	CCM_01247	-1000	1000			kegg.reaction/R01800	Glycerophospholipid biosynthesis		Glycerophospholipid biosynthesis		2	PSSA160	EC Number: http://identifiers.org/ec-code/2.7.8.8; MetaNetX (MNX) Equation: http://identifiers.org/metanetx.reaction/MNXR103269; SEED Reaction: http://identifiers.org/seed.reaction/rxn09208
	r0295	phosphatidyl-L-serine carboxy-lyase	phosphatidylserine[c] => co2[c] + phosphatidylethanolamines[c]	4.1.1.65;4.1.1.65	CCM_05648 or CCM_06063 or CCM_07932 or CCM_08421 or CCM_09213	0	1000			kegg.reaction/R02055	Glycerophospholipid biosynthesis		Glycerophospholipid biosynthesis		2	PSD120	EC Number: http://identifiers.org/ec-code/4.1.1.65; MetaNetX (MNX) Equation: http://identifiers.org/metanetx.reaction/MNXR103229
	r0296	S-adenosyl-L-methionine:phosphatidylethanolamine N-methyltransferase	phosphatidylethanolamines[c] + s-adenosyl-l-methionine[c] => phosphatidyl-n-methylethanolamines[c] + s-adenosyl-l-homocysteine[c]	2.1.1.17;2.1.1.17	CCM_04620 or CCM_04704	0	1000			kegg.reaction/R02056	Glycerophospholipid biosynthesis		Glycerophospholipid biosynthesis		2	HMR_0653
	r0297	S-adenosyl-L-methionine:phosphatidyl-N-methylethanolamine N-methyltransferase	phosphatidyl-n-methylethanolamines[c] + s-adenosyl-l-methionine[c] => phosphatidyl-n-dimethylethanolamine[c] + s-adenosyl-l-homocysteine[c]	2.1.1.71;2.1.1.16;2.1.1.71	CCM_04620	0	1000			kegg.reaction/R03424	Glycerophospholipid biosynthesis		Glycerophospholipid biosynthesis		2	HMR_0654
	r0298	S-adenosyl-L-methionine:phosphatidyl-N-dimethylethanolamine N-methyltransferase	phosphatidyl-n-dimethylethanolamine[c] + s-adenosyl-l-methionine[c] => phosphatidylcholines[c] + s-adenosyl-l-homocysteine[c]	2.1.1.71;2.1.1.16;2.1.1.71	CCM_04620	0	1000			kegg.reaction/R01320	Glycerophospholipid biosynthesis		Glycerophospholipid biosynthesis		2	HMR_0657
	r0299	CDP-diacylglycerol:sn-glycerol-3-phosphate 3-phosphatidyltransferase	cdp-diacylglycerol[c] + glycerol 3-phosphate[c] => cmp[c] + phosphatidylglycerophosphate[c]	2.7.8.5;2.7.8.5	CCM_09410	0	1000			kegg.reaction/R01801	Glycerophospholipid biosynthesis		Glycerophospholipid biosynthesis		2	PGSA160	EC Number: http://identifiers.org/ec-code/2.7.8.5; MetaNetX (MNX) Equation: http://identifiers.org/metanetx.reaction/MNXR102592; SEED Reaction: http://identifiers.org/seed.reaction/rxn09111
	r0301	CDP-diacylglycerol:phosphatidylglycerol 3-phosphatidyltransferase	cdp-diacylglycerol[c] + phosphatidylglycerol[c] => cardiolipin[c] + cmp[c]	2.7.8.-;2.7.8.41	CCM_05831 or CCM_09410	0	1000			kegg.reaction/R02030	Glycerophospholipid biosynthesis		Glycerophospholipid biosynthesis		2	HMR_0586
	r0302	phospholipase A2/lecithinase a/phosphatidase/phosphatidolipase/phospholipase A	phosphatidylcholines[c] => free fatty acids[c] + lysophosphatidylcholine[c]	3.1.1.4	CCM_02980	0	1000				Glycerophospholipid biosynthesis		Glycerophospholipid biosynthesis		2	PLIPA2A120pp	EC Number: http://identifiers.org/ec-code/3.1.1.4; MetaNetX (MNX) Equation: http://identifiers.org/metanetx.reaction/MNXR102989
	r0303	phosphatidylethanolamine 2-acylhydrolase	h2o[c] + phosphatidylethanolamines[c] => free fatty acids[c] + l-lysophosphatidylethanolamine[c]	3.1.1.4	CCM_02980	0	1000			kegg.reaction/R02053	Glycerophospholipid biosynthesis		Glycerophospholipid biosynthesis		2	PLIPA2A120pp	EC Number: http://identifiers.org/ec-code/3.1.1.4; MetaNetX (MNX) Equation: http://identifiers.org/metanetx.reaction/MNXR102989
	r0304	1-acyl-sn-glycero-3-phosphoethanolamine aldehydohydrolase	h2o[c] + l-lysophosphatidylethanolamine[c] => free fatty acids[c] + glycerophosphatidylethanolamine[c]	3.1.1.5	CCM_08626 or CCM_01743 or CCM_02898 or CCM_03865 or CCM_04161 or CCM_04741 or CCM_04931 or CCM_06999	0	1000			kegg.reaction/R03416	Glycerophospholipid biosynthesis		Glycerophospholipid biosynthesis		2	LPLIPAL1A140pp	EC Number: http://identifiers.org/ec-code/3.1.1.5; MetaNetX (MNX) Equation: http://identifiers.org/metanetx.reaction/MNXR101142
	r0305	sn-glycero-3-phosphoethanolamine glycerophosphohydrolase	glycerophosphatidylethanolamine[c] + h2o[c] => ethanolamine[c] + glycerol 3-phosphate[c]	3.1.4.2;3.1.4.46	CCM_00521	0	1000			kegg.reaction/R01470	Glycerophospholipid biosynthesis		Glycerophospholipid biosynthesis		2	GPDDA2	RHEA: http://identifiers.org/rhea/29319; RHEA: http://identifiers.org/rhea/29320; RHEA: http://identifiers.org/rhea/29321; RHEA: http://identifiers.org/rhea/29322; EC Number: http://identifiers.org/ec-code/3.1.4.2; EC Number: http://identifiers.org/ec-code/3.1.4.46; BioCyc: http://identifiers.org/biocyc/META:RXN-14160; MetaNetX (MNX) Equation: http://identifiers.org/metanetx.reaction/MNXR100411; …
	r0306	1-acylglycerol-3-phosphate O-acyltransferase	acyl-[acp][c] + acylglycerol 3-phosphate[c] => acyl-carrier protein[c] + phosphatidate[c]	2.3.1.51	CCM_06662 or CCM_02787 or CCM_02942	0	1000				Glycerophospholipid biosynthesis		Glycerophospholipid biosynthesis		2	HMR_0593
	r0307	sn-glycerol-3-phosphate:(acceptor) 2-oxidoreductase	glycerol 3-phosphate[c] + fad[m] => glycerone phosphate[c] + fadh2[m]	1.1.5.3	CCM_01734 or CCM_07439	0	1000			kegg.reaction/R00848	Glycerophospholipid biosynthesis		Glycerophospholipid biosynthesis		2	G3PDm	EC Number: http://identifiers.org/ec-code/1.1.5.3; EC Number: http://identifiers.org/ec-code/1.1.99.5; RHEA: http://identifiers.org/rhea/31283; RHEA: http://identifiers.org/rhea/31284; RHEA: http://identifiers.org/rhea/31285; RHEA: http://identifiers.org/rhea/31286; MetaNetX (MNX) Equation: http://identifiers.org/metanetx.reaction/MNXR99875; Reactome Reaction: http://identifiers.org/reactome/R-AT…
	r0308	sn-glycerol-3-phosphate:NAD+ 2-oxidoreductase	glycerone phosphate[c] + nadh[c] => glycerol 3-phosphate[c] + nad(+)[c]	1.1.1.8	CCM_03540	0	1000			kegg.reaction/R00842	Glycerophospholipid biosynthesis		Glycerophospholipid biosynthesis		2	G3PD1ir	EC Number: http://identifiers.org/ec-code/1.1.1.8; EC Number: http://identifiers.org/ec-code/1.1.1.94; RHEA: http://identifiers.org/rhea/11092; RHEA: http://identifiers.org/rhea/11093; RHEA: http://identifiers.org/rhea/11094; RHEA: http://identifiers.org/rhea/11095; BioCyc: http://identifiers.org/biocyc/META:1.1.1.8-RXN; MetaNetX (MNX) Equation: http://identifiers.org/metanetx.reaction/MNXR99876;…
	r0309	ethanolamine oxidase	ethanolamine[c] + h2o[c] + o2[c] => glycolaldehyde[c] + h2o2[c] + nh3[c]	1.4.3.21	CCM_02614 or CCM_05218 or CCM_06912	0	1000				Glycerophospholipid biosynthesis		Glycerophospholipid biosynthesis		2
	r0310	phosphatidylglycerol cholinephosphohydrolase	h2o[c] + phosphatidylglycerol[c] => diacylglycerol[c] + glycerol 3-phosphate[c]	3.1.4.3	CCM_04826 or CCM_04826	0	1000			kegg.reaction/R02027	Glycerophospholipid biosynthesis		Glycerophospholipid biosynthesis		2
	r0311	1-phosphatidyl-D-myo-inositol inositolphosphohydrolase	1-phosphatidyl-1d-myo-inositols[c] + h2o[c] => 1d-myo-inositol 1-phosphate[c] + diacylglycerol[c]	3.1.4.3;4.6.1.13	CCM_04826 or CCM_02309	0	1000			kegg.reaction/R03332	Glycerophospholipid biosynthesis		Glycerophospholipid biosynthesis		2
	r0314	sn-glycero-3-phosphocholine glycerophosphohydrolase	glycerophosphocholine[c] + h2o[c] => choline[c] + glycerol 3-phosphate[c]	3.1.4.46	CCM_05136	0	1000			kegg.reaction/R01030	Glycerophospholipid biosynthesis		Glycerophospholipid biosynthesis		2	GPDDA1pp	RHEA: http://identifiers.org/rhea/16061; RHEA: http://identifiers.org/rhea/16062; RHEA: http://identifiers.org/rhea/16063; RHEA: http://identifiers.org/rhea/16064; EC Number: http://identifiers.org/ec-code/3.1.4.2; EC Number: http://identifiers.org/ec-code/3.1.4.46; BioCyc: http://identifiers.org/biocyc/META:3.1.4.2-RXN; MetaNetX (MNX) Equation: http://identifiers.org/metanetx.reaction/MNXR100410…
	r0315	UTP:N-acetyl-alpha-D-glucosamine-1-phosphate uridylyltransferase	diphosphate[c] + udp-n-acetyl-d-glucosamine[c] <=> n-acetyl-d-glucosamine 1-phosphate[c] + utp[c]	2.7.7.23	CCM_05430	-1000	1000			kegg.reaction/R00416	Amino sugar and nucleotide sugar metabolism		Amino sugar and nucleotide sugar metabolism		2	UAGDP	EC Number: http://identifiers.org/ec-code/2.7.7.23; MetaNetX (MNX) Equation: http://identifiers.org/metanetx.reaction/MNXR105033; Reactome Reaction: http://identifiers.org/reactome/R-ATH-446204; Reactome Reaction: http://identifiers.org/reactome/R-BTA-446204; Reactome Reaction: http://identifiers.org/reactome/R-CEL-446204; Reactome Reaction: http://identifiers.org/reactome/R-CFA-446204; Reactome …
	r0316	chitobiose N-acetylglucosaminohydrolase	chitobiose[c] + h2o[c] => 2 n-acetyl-d-glucosamine[c]	3.2.1.52;3.2.1.52	CCM_03481 or CCM_04621 or CCM_08713 or CCM_08995 or CCM_09240	0	1000			kegg.reaction/R00022	Amino sugar and nucleotide sugar metabolism		Amino sugar and nucleotide sugar metabolism		2	AHEXASE3	EC Number: http://identifiers.org/ec-code/3.2.1.52; MetaNetX (MNX) Equation: http://identifiers.org/metanetx.reaction/MNXR138034
	r0319	chitinase	2 chitin[e] + h2o[e] => chitobiose[e]	3.2.1.14	CCM_00485 or CCM_04817 or CCM_07471 or CCM_09122 or CCM_09179 or CCM_00318 or CCM_03279 or CCM_03587 or CCM_05116 or CCM_05688 or CCM_05744 or CCM_06071 or CCM_06535 or CCM_08020 or CCM_08172 or CCM_08916 or CCM_09127 or CCM_09128	0	1000				Amino sugar and nucleotide sugar metabolism		Amino sugar and nucleotide sugar metabolism		2
	r0321	[1,4-(N-Acetyl-beta-D-glucosaminyl)]n glycanohydrolase	chitin[e] + h2o[e] => n-acetyl-d-glucosamine[e]	3.2.1.14	CCM_00485 or CCM_04817 or CCM_07471 or CCM_09122 or CCM_09179 or CCM_00318 or CCM_03279 or CCM_03587 or CCM_05116 or CCM_05688 or CCM_05744 or CCM_06071 or CCM_06535 or CCM_08020 or CCM_08172 or CCM_08916 or CCM_09127 or CCM_09128	0	1000			kegg.reaction/R01206	Amino sugar and nucleotide sugar metabolism		Amino sugar and nucleotide sugar metabolism		2
	r0322	N-acetyl-D-glucosamine-6-phosphate amidohydrolase	h2o[c] + n-acetyl-d-glucosamine 6-phosphate[c] => acetate[c] + d-glucosamine 6-phosphate[c]	3.5.1.25;3.5.1.25	CCM_04622	0	1000			kegg.reaction/R02059	Amino sugar and nucleotide sugar metabolism		Amino sugar and nucleotide sugar metabolism		2	AGDC	RHEA: http://identifiers.org/rhea/22936; RHEA: http://identifiers.org/rhea/22937; RHEA: http://identifiers.org/rhea/22938; RHEA: http://identifiers.org/rhea/22939; EC Number: http://identifiers.org/ec-code/3.5.1.25; BioCyc: http://identifiers.org/biocyc/META:NAG6PDEACET-RXN; MetaNetX (MNX) Equation: http://identifiers.org/metanetx.reaction/MNXR95528; KEGG Reaction: http://identifiers.org/kegg.rea…
	r0323	D-glucosamine-6-phosphate aminohydrolase (ketol isomerizing)	d-glucosamine 6-phosphate[c] + h2o[c] => beta-d-fructofuranose 6-phosphate[c] + nh3[c]	3.5.99.6	CCM_04624	0	1000			kegg.reaction/R00765	Amino sugar and nucleotide sugar metabolism		Amino sugar and nucleotide sugar metabolism		2	G6PDA_1	EC Number: http://identifiers.org/ec-code/3.5.99.6; MetaNetX (MNX) Equation: http://identifiers.org/metanetx.reaction/MNXR99905; KEGG Reaction: http://identifiers.org/kegg.reaction/R00765; SEED Reaction: http://identifiers.org/seed.reaction/rxn00552
	r0324	ATP:D-glucosamine 6-phosphotransferase	atp[c] + d-glucosamine[c] => adp[c] + d-glucosamine 6-phosphate[c]	2.7.1.1;2.7.1.1;2.7.1.8	CCM_03320 or CCM_04625 or CCM_06280 or CCM_08316 or CCM_04278 or CCM_04625 or CCM_06280 or CCM_08316	0	1000			kegg.reaction/R01961	Amino sugar and nucleotide sugar metabolism		Amino sugar and nucleotide sugar metabolism		2	HEX10	RHEA: http://identifiers.org/rhea/10948; RHEA: http://identifiers.org/rhea/10949; RHEA: http://identifiers.org/rhea/10950; RHEA: http://identifiers.org/rhea/10951; EC Number: http://identifiers.org/ec-code/2.7.1.1; EC Number: http://identifiers.org/ec-code/2.7.1.8; BioCyc: http://identifiers.org/biocyc/META:GLUCOSAMINE-KINASE-RXN; MetaNetX (MNX) Equation: http://identifiers.org/metanetx.reaction/…
	r0329	N-acetyl-D-glucosamine 1-phosphate 1,6-phosphomutase	n-acetyl-d-glucosamine 1-phosphate[c] <=> n-acetyl-d-glucosamine 6-phosphate[c]	5.4.2.3	CCM_01016 or CCM_07039	-1000	1000			kegg.reaction/R08193	Amino sugar and nucleotide sugar metabolism		Amino sugar and nucleotide sugar metabolism		2	ACGAMPM	EC Number: http://identifiers.org/ec-code/5.4.2.3; MetaNetX (MNX) Equation: http://identifiers.org/metanetx.reaction/MNXR95250; Reactome Reaction: http://identifiers.org/reactome/R-ATH-446185; Reactome Reaction: http://identifiers.org/reactome/R-BTA-446185; Reactome Reaction: http://identifiers.org/reactome/R-CEL-446185; Reactome Reaction: http://identifiers.org/reactome/R-CFA-446185; Reactome Re…
	r0330	N-acetyl-D-glucosamine amidohydrolase	h2o[c] + n-acetyl-d-glucosamine[c] => acetate[c] + d-glucosamine[c]	3.5.1.33	CCM_06323	0	1000			kegg.reaction/R01200	Amino sugar and nucleotide sugar metabolism		Amino sugar and nucleotide sugar metabolism		2
	r0331	acetyl-CoA:D-glucosamine-6-phosphate N-acetyltransferase	acetyl-coa[c] + d-glucosamine 6-phosphate[c] <=> coenzyme a[c] + n-acetyl-d-glucosamine 6-phosphate[c]	2.3.1.4	CCM_01159 or CCM_06566 or CCM_07914	-1000	1000			kegg.reaction/R02058	Amino sugar and nucleotide sugar metabolism		Amino sugar and nucleotide sugar metabolism		2	ACGAM6PS	RHEA: http://identifiers.org/rhea/10292; RHEA: http://identifiers.org/rhea/10293; RHEA: http://identifiers.org/rhea/10294; RHEA: http://identifiers.org/rhea/10295; EC Number: http://identifiers.org/ec-code/2.3.1.4; BioCyc: http://identifiers.org/biocyc/META:GLUCOSAMINEPNACETYLTRANS-RXN; MetaNetX (MNX) Equation: http://identifiers.org/metanetx.reaction/MNXR95248; KEGG Reaction: http://identifiers.…
	r0334	allantoin amidohydrolase	allantoin[p] + h2o[p] => allantoate[p]	3.5.2.5	CCM_00497 or CCM_00497	0	1000			kegg.reaction/R02424	Purine metabolism		Purine metabolism		2	ALLTN	EC Number: http://identifiers.org/ec-code/3.5.2.5; RHEA: http://identifiers.org/rhea/30819; RHEA: http://identifiers.org/rhea/30820; RHEA: http://identifiers.org/rhea/30821; RHEA: http://identifiers.org/rhea/30822; MetaNetX (MNX) Equation: http://identifiers.org/metanetx.reaction/MNXR95769; SEED Reaction: http://identifiers.org/seed.reaction/rxn01748
	r0336	ATP:D-ribose-5-phosphate diphosphotransferase	5-phospho-alpha-d-ribose 1-diphosphate[c] + amp[c] <=> atp[c] + d-ribose 5-phosphate[c]	2.7.6.1	CCM_00434 or CCM_02500 or CCM_04665	-1000	1000			kegg.reaction/R01049	Purine metabolism		Purine metabolism		2	PRPPS	EC Number: http://identifiers.org/ec-code/2.7.6.1; MetaNetX (MNX) Equation: http://identifiers.org/metanetx.reaction/MNXR103215
	r0337	ATP diphosphate-lyase (cyclizing; 3',5'-cyclic-AMP-forming)	atp[c] => 3',5'-cyclic amp[c] + diphosphate[c]	4.6.1.1;4.6.1.1	CCM_06928	0	1000			kegg.reaction/R00089	Purine metabolism		Purine metabolism		2	ADNCYC	RHEA: http://identifiers.org/rhea/15389; RHEA: http://identifiers.org/rhea/15390; RHEA: http://identifiers.org/rhea/15391; RHEA: http://identifiers.org/rhea/15392; EC Number: http://identifiers.org/ec-code/4.6.1.1; BioCyc: http://identifiers.org/biocyc/META:ADENYLATECYC-RXN; MetaNetX (MNX) Equation: http://identifiers.org/metanetx.reaction/MNXR95444; Reactome Reaction: http://identifiers.org/reac…
	r0338	ATP diphosphate-lyase (cyclizing; 3',5'-cyclic-AMP-forming)	datp[c] => 3',5'-cyclic damp[c] + diphosphate[c]	4.6.1.1	CCM_06928	0	1000				Purine metabolism		Purine metabolism		2	ADNCYC	RHEA: http://identifiers.org/rhea/15389; RHEA: http://identifiers.org/rhea/15390; RHEA: http://identifiers.org/rhea/15391; RHEA: http://identifiers.org/rhea/15392; EC Number: http://identifiers.org/ec-code/4.6.1.1; BioCyc: http://identifiers.org/biocyc/META:ADENYLATECYC-RXN; MetaNetX (MNX) Equation: http://identifiers.org/metanetx.reaction/MNXR95444; Reactome Reaction: http://identifiers.org/reac…
	r0339	GTP diphosphate-lyase (cyclizing; 3',5'-cyclic-GMP-forming)	gtp[c] => 3',5'-cyclic gmp[c] + diphosphate[c]	4.6.1.1;4.6.1.1;4.6.1.2	CCM_06928	0	1000			kegg.reaction/R00434	Purine metabolism		Purine metabolism		2	GUAC	RHEA: http://identifiers.org/rhea/13665; RHEA: http://identifiers.org/rhea/13666; RHEA: http://identifiers.org/rhea/13667; RHEA: http://identifiers.org/rhea/13668; EC Number: http://identifiers.org/ec-code/4.6.1.1; EC Number: http://identifiers.org/ec-code/4.6.1.2; BioCyc: http://identifiers.org/biocyc/META:GUANYLCYC-RXN; MetaNetX (MNX) Equation: http://identifiers.org/metanetx.reaction/MNXR10046…
	r0340	1-(5-phospho-D-ribosyl)-5-amino-4-imidazolecarboxylate carboxy-lyase	1-(5-phospho-d-ribosyl)-5-amino-4-imidazolecarboxylate[c] <=> 5-amino-1-(5-phospho-d-ribosyl)imidazole[c] + co2[c]	4.1.1.21	CCM_06867	-1000	1000			kegg.reaction/R04209	Purine metabolism		Purine metabolism		2	AIRCr	RHEA: http://identifiers.org/rhea/10792; RHEA: http://identifiers.org/rhea/10793; RHEA: http://identifiers.org/rhea/10794; RHEA: http://identifiers.org/rhea/10795; EC Number: http://identifiers.org/ec-code/4.1.1.21; MetaNetX (MNX) Equation: http://identifiers.org/metanetx.reaction/MNXR95646
	r0341	1-(5-phosphoribosyl)-5-amino-4-carboxyimidazole:L-aspartate ligase (ADP-forming)	(2s)-2-[5-amino-1-(5-phospho-beta-d-ribosyl)imidazole-4-carboxamido]succinic acid[c] + adp[c] + phosphate[c] <=> 1-(5-phospho-d-ribosyl)-5-amino-4-imidazolecarboxylate[c] + atp[c] + l-aspartate[c]	6.3.2.6	CCM_02686	-1000	1000			kegg.reaction/R04591	Purine metabolism		Purine metabolism		2	PRAISh	RHEA: http://identifiers.org/rhea/22628; RHEA: http://identifiers.org/rhea/22629; RHEA: http://identifiers.org/rhea/22630; RHEA: http://identifiers.org/rhea/22631; EC Number: http://identifiers.org/ec-code/6.3.2.6; BioCyc: http://identifiers.org/biocyc/META:SAICARSYN-RXN; MetaNetX (MNX) Equation: http://identifiers.org/metanetx.reaction/MNXR108987; Reactome Reaction: http://identifiers.org/reacto…
	r0342	1-(5'-phosphoribosyl)-5-amino-4-(N-succinocarboxamide)-imidazole AMP-lyase	(2s)-2-[5-amino-1-(5-phospho-beta-d-ribosyl)imidazole-4-carboxamido]succinic acid[c] <=> 5-amino-1-(5-phospho-d-ribosyl)imidazole-4-carboxamide[c] + fumarate[c]	4.3.2.2	CCM_05789	-1000	1000			kegg.reaction/R04559	Purine metabolism		Purine metabolism		2	ADSL2r	RHEA: http://identifiers.org/rhea/23920; RHEA: http://identifiers.org/rhea/23921; RHEA: http://identifiers.org/rhea/23922; RHEA: http://identifiers.org/rhea/23923; EC Number: http://identifiers.org/ec-code/4.3.2.2; BioCyc: http://identifiers.org/biocyc/META:AICARSYN-RXN; MetaNetX (MNX) Equation: http://identifiers.org/metanetx.reaction/MNXR108966; Reactome Reaction: http://identifiers.org/reactom…
	r0343	2-(formamido)-N1-(5-phosphoribosyl)acetamidine cyclo-ligase (ADP-forming)	2-formamido-n(1)-(5-phospho-d-ribosyl)acetamidine[c] + atp[c] => 5-amino-1-(5-phospho-d-ribosyl)imidazole[c] + adp[c] + phosphate[c]	6.3.3.1;6.3.3.1	CCM_05854 or CCM_07381	0	1000			kegg.reaction/R04208	Purine metabolism		Purine metabolism		2	PRAIS	RHEA: http://identifiers.org/rhea/23032; RHEA: http://identifiers.org/rhea/23033; RHEA: http://identifiers.org/rhea/23034; RHEA: http://identifiers.org/rhea/23035; EC Number: http://identifiers.org/ec-code/6.3.3.1; MetaNetX (MNX) Equation: http://identifiers.org/metanetx.reaction/MNXR138720
	r0344	5'-phosphoribosylformylglycinamide:L-glutamine amido-ligase (ADP-forming)	atp[c] + h2o[c] + l-glutamine[c] + n(2)-formyl-n(1)-(5-phospho-d-ribosyl)glycinamide[c] => 2-formamido-n(1)-(5-phospho-d-ribosyl)acetamidine[c] + adp[c] + l-glutamate[c] + phosphate[c]	6.3.5.3;6.3.5.3	CCM_08622	0	1000			kegg.reaction/R04463	Purine metabolism		Purine metabolism		2	PRFGS	RHEA: http://identifiers.org/rhea/17129; RHEA: http://identifiers.org/rhea/17130; RHEA: http://identifiers.org/rhea/17131; RHEA: http://identifiers.org/rhea/17132; EC Number: http://identifiers.org/ec-code/6.3.5.3; MetaNetX (MNX) Equation: http://identifiers.org/metanetx.reaction/MNXR138721; Reactome Reaction: http://identifiers.org/reactome/R-ATH-73812; Reactome Reaction: http://identifiers.org/…
	r0345	5-phospho-D-ribosylamine:glycine ligase (ADP-forming)	5-phospho-d-ribosylamine[c] + atp[c] + glycine[c] <=> adp[c] + n(1)-(5-phospho-d-ribosyl)glycinamide[c] + phosphate[c]	6.3.4.13	CCM_05854 or CCM_07381	-1000	1000			kegg.reaction/R04144	Purine metabolism		Purine metabolism		2	PRAGSr	EC Number: http://identifiers.org/ec-code/6.3.4.13; BioCyc: http://identifiers.org/biocyc/META:GLYRIBONUCSYN-RXN; MetaNetX (MNX) Equation: http://identifiers.org/metanetx.reaction/MNXR103139; KEGG Reaction: http://identifiers.org/kegg.reaction/R04144; SEED Reaction: http://identifiers.org/seed.reaction/rxn02895
	r0346	5-phosphoribosylamine:diphosphate phospho-alpha-D-ribosyltransferase (glutamate-amidating)	5-phospho-alpha-d-ribose 1-diphosphate[c] + h2o[c] + l-glutamine[c] => 5-phospho-d-ribosylamine[c] + diphosphate[c] + l-glutamate[c]	2.4.2.14	CCM_08738	0	1000			kegg.reaction/R01072	Purine metabolism		Purine metabolism		2	GLUPRT	RHEA: http://identifiers.org/rhea/14905; RHEA: http://identifiers.org/rhea/14906; RHEA: http://identifiers.org/rhea/14907; RHEA: http://identifiers.org/rhea/14908; EC Number: http://identifiers.org/ec-code/2.4.2.14; BioCyc: http://identifiers.org/biocyc/META:PRPPAMIDOTRANS-RXN; MetaNetX (MNX) Equation: http://identifiers.org/metanetx.reaction/MNXR100287; Reactome Reaction: http://identifiers.org/…
	r0347	10-formyltetrahydrofolate:5'-phosphoribosyl-5-amino-4-imidazolecarboxamide formyltransferase	10-formyltetrahydrofolate[c] + 5-amino-1-(5-phospho-d-ribosyl)imidazole-4-carboxamide[c] <=> 5-formamido-1-(5-phospho-d-ribosyl)imidazole-4-carboxamide[c] + tetrahydrofolate[c]	2.1.2.3	CCM_05543	-1000	1000			kegg.reaction/R04560	Purine metabolism		Purine metabolism		2	AICART	EC Number: http://identifiers.org/ec-code/2.1.2.3; RHEA: http://identifiers.org/rhea/22192; RHEA: http://identifiers.org/rhea/22193; RHEA: http://identifiers.org/rhea/22194; RHEA: http://identifiers.org/rhea/22195; MetaNetX (MNX) Equation: http://identifiers.org/metanetx.reaction/MNXR95639; Reactome Reaction: http://identifiers.org/reactome/R-ATH-73798; Reactome Reaction: http://identifiers.org/r…
	r0348	IMP 1,2-hydrolase (decyclizing)	5-formamido-1-(5-phospho-d-ribosyl)imidazole-4-carboxamide[c] <=> h2o[c] + imp[c]	3.5.4.10	CCM_05543	-1000	1000			kegg.reaction/R01127	Purine metabolism		Purine metabolism		2	IMPC	RHEA: http://identifiers.org/rhea/18445; RHEA: http://identifiers.org/rhea/18446; RHEA: http://identifiers.org/rhea/18447; RHEA: http://identifiers.org/rhea/18448; EC Number: http://identifiers.org/ec-code/2.1.2.3; EC Number: http://identifiers.org/ec-code/3.5.4.10; BioCyc: http://identifiers.org/biocyc/META:IMPCYCLOHYDROLASE-RXN; MetaNetX (MNX) Equation: http://identifiers.org/metanetx.reaction/…
	r0349	IMP:L-aspartate ligase (GDP-forming)	gtp[c] + imp[c] + l-aspartate[c] => gdp[c] + n6-(1,2-dicarboxyethyl)-amp[c] + phosphate[c]	6.3.4.4	CCM_06768 or CCM_07353	0	1000			kegg.reaction/R01135	Purine metabolism		Purine metabolism		2	ADSS	RHEA: http://identifiers.org/rhea/15753; RHEA: http://identifiers.org/rhea/15754; RHEA: http://identifiers.org/rhea/15755; RHEA: http://identifiers.org/rhea/15756; EC Number: http://identifiers.org/ec-code/6.3.4.4; BioCyc: http://identifiers.org/biocyc/META:ADENYLOSUCCINATE-SYNTHASE-RXN; MetaNetX (MNX) Equation: http://identifiers.org/metanetx.reaction/MNXR95495; Reactome Reaction: http://identif…
	r0350	N6-(1,2-dicarboxyethyl)AMP AMP-lyase (fumarate-forming)	amp[c] + fumarate[c] <=> n6-(1,2-dicarboxyethyl)-amp[c]	4.3.2.2	CCM_05789	-1000	1000			kegg.reaction/R01083	Purine metabolism		Purine metabolism		2	ADSL1r	RHEA: http://identifiers.org/rhea/16853; RHEA: http://identifiers.org/rhea/16854; RHEA: http://identifiers.org/rhea/16855; RHEA: http://identifiers.org/rhea/16856; EC Number: http://identifiers.org/ec-code/4.3.2.2; BioCyc: http://identifiers.org/biocyc/META:AMPSYN-RXN; MetaNetX (MNX) Equation: http://identifiers.org/metanetx.reaction/MNXR95493; Reactome Reaction: http://identifiers.org/reactome/R…
	r0351	xanthosine-5'-phosphate:L-glutamine amido-ligase (AMP-forming)	atp[c] + h2o[c] + l-glutamine[c] + xanthosine 5'-phosphate[c] => amp[c] + diphosphate[c] + gmp[c] + l-glutamate[c]	6.3.5.2;6.3.5.2	CCM_02731 or CCM_08802	0	1000			kegg.reaction/R01231	Purine metabolism		Purine metabolism		2	GMPS2	RHEA: http://identifiers.org/rhea/11680; RHEA: http://identifiers.org/rhea/11681; RHEA: http://identifiers.org/rhea/11682; RHEA: http://identifiers.org/rhea/11683; EC Number: http://identifiers.org/ec-code/6.3.5.2; BioCyc: http://identifiers.org/biocyc/META:GMP-SYN-GLUT-RXN; MetaNetX (MNX) Equation: http://identifiers.org/metanetx.reaction/MNXR100384; KEGG Reaction: http://identifiers.org/kegg.re…
	r0352	AMP aminohydrolase	amp[c] + h2o[c] => imp[c] + nh3[c]	3.5.4.6;3.5.4.17;3.5.4.6	CCM_09680	0	1000			kegg.reaction/R00181	Purine metabolism		Purine metabolism		2	AMPDA	RHEA: http://identifiers.org/rhea/14777; RHEA: http://identifiers.org/rhea/14778; RHEA: http://identifiers.org/rhea/14779; RHEA: http://identifiers.org/rhea/14780; EC Number: http://identifiers.org/ec-code/3.5.4.17; EC Number: http://identifiers.org/ec-code/3.5.4.6; BioCyc: http://identifiers.org/biocyc/META:AMP-DEAMINASE-RXN; MetaNetX (MNX) Equation: http://identifiers.org/metanetx.reaction/MNXR…
	r0353	adenosine 3',5'-phosphate 5'-nucleotidohydrolase	3',5'-cyclic amp[c] + h2o[c] => amp[c]	3.1.4.17	CCM_02664 or CCM_02777	0	1000			kegg.reaction/R00191	Purine metabolism		Purine metabolism		2	PDE1	RHEA: http://identifiers.org/rhea/25277; RHEA: http://identifiers.org/rhea/25278; RHEA: http://identifiers.org/rhea/25279; RHEA: http://identifiers.org/rhea/25280; EC Number: http://identifiers.org/ec-code/3.1.4.17; EC Number: http://identifiers.org/ec-code/3.1.4.53; BioCyc: http://identifiers.org/biocyc/META:RXN0-5038; MetaNetX (MNX) Equation: http://identifiers.org/metanetx.reaction/MNXR95886; …
	r0354	35-cyclic nucleotide phosphodiesterase	3',5'-cyclic damp[c] + h2o[c] => damp[c]	3.1.4.17	CCM_02664 or CCM_02777	0	1000				Purine metabolism		Purine metabolism		2	PDE2	EC Number: http://identifiers.org/ec-code/3.1.4.17; MetaNetX (MNX) Equation: http://identifiers.org/metanetx.reaction/MNXR136084; SEED Reaction: http://identifiers.org/seed.reaction/rxn09561
	r0355	guanosine 3',5'-cyclic phosphate 5'-nucleotidohydrolase	3',5'-cyclic gmp[c] + h2o[c] => gmp[c]	3.1.4.17	CCM_02664 or CCM_02777	0	1000			kegg.reaction/R01234	Purine metabolism		Purine metabolism		2	GCPN	RHEA: http://identifiers.org/rhea/16957; RHEA: http://identifiers.org/rhea/16958; RHEA: http://identifiers.org/rhea/16959; RHEA: http://identifiers.org/rhea/16960; EC Number: http://identifiers.org/ec-code/3.1.4.17; EC Number: http://identifiers.org/ec-code/3.1.4.35; BioCyc: http://identifiers.org/biocyc/META:35-CYCLIC-GMP-PHOSPHODIESTERASE-RXN; MetaNetX (MNX) Equation: http://identifiers.org/met…
	r0356	ADP-ribose ribophosphohydrolase	5-deoxy-d-ribofuranos-5-yl-adp[c] + h2o[c] => amp[c] + d-ribose 5-phosphate[c]	3.6.1.13;3.6.1.-;3.6.1.13;3.6.1.21;3.6.1.53	CCM_06624	0	1000			kegg.reaction/R01054	Purine metabolism		Purine metabolism		2	ADPRDPm	EC Number: http://identifiers.org/ec-code/3.6.1.13; MetaNetX (MNX) Equation: http://identifiers.org/metanetx.reaction/MNXR95480
	r0357	guanine aminohydrolase	guanine[c] + h2o[c] => nh3[c] + xanthine[c]	3.5.4.3;3.5.4.3	CCM_01454 or CCM_02996	0	1000			kegg.reaction/R01676	Purine metabolism		Purine metabolism		2	GUAD_1	RHEA: http://identifiers.org/rhea/14665; RHEA: http://identifiers.org/rhea/14666; RHEA: http://identifiers.org/rhea/14667; RHEA: http://identifiers.org/rhea/14668; EC Number: http://identifiers.org/ec-code/3.5.4.3; BioCyc: http://identifiers.org/biocyc/META:GUANINE-DEAMINASE-RXN; MetaNetX (MNX) Equation: http://identifiers.org/metanetx.reaction/MNXR100464; Reactome Reaction: http://identifiers.or…
	r0358	xanthine:NAD+ oxidoreductase	nad(+)[p] + xanthine[p] => nadh[p] + urate[p]	1.17.1.4	CCM_08980	0	1000			kegg.reaction/R02103	Purine metabolism		Purine metabolism		2	XAND	EC Number: http://identifiers.org/ec-code/1.17.1.4; RHEA: http://identifiers.org/rhea/16669; RHEA: http://identifiers.org/rhea/16670; RHEA: http://identifiers.org/rhea/16671; RHEA: http://identifiers.org/rhea/16672; BioCyc: http://identifiers.org/biocyc/META:RXN0-901; MetaNetX (MNX) Equation: http://identifiers.org/metanetx.reaction/MNXR105225; Reactome Reaction: http://identifiers.org/reactome/R…
	r0359	xanthine:oxygen oxidoreductase	o2[p] + xanthine[p] => h2o2[p] + urate[p]	1.17.3.2	CCM_08980	0	1000			kegg.reaction/R02107	Purine metabolism		Purine metabolism		2	XAOx	EC Number: http://identifiers.org/ec-code/1.17.3.2; RHEA: http://identifiers.org/rhea/21132; RHEA: http://identifiers.org/rhea/21133; RHEA: http://identifiers.org/rhea/21134; RHEA: http://identifiers.org/rhea/21135; BioCyc: http://identifiers.org/biocyc/META:XANTHINE-OXIDASE-RXN; MetaNetX (MNX) Equation: http://identifiers.org/metanetx.reaction/MNXR105228; Reactome Reaction: http://identifiers.or…
	r0360	urate:oxygen oxidoreductase	o2[p] + urate[p] => 5-hydroxyisourate[p] + h2o2[p]	1.7.3.3	CCM_09432	0	1000			kegg.reaction/R02106	Purine metabolism		Purine metabolism		2	HMR_6611
	r0361	IMP:NAD+ oxidoreductase	h2o[c] + imp[c] + nad(+)[c] => nadh[c] + xanthosine 5'-phosphate[c]	1.1.1.205;1.1.1.205	CCM_05418	0	1000			kegg.reaction/R01130	Purine metabolism		Purine metabolism		2	IMPD	EC Number: http://identifiers.org/ec-code/1.1.1.205; RHEA: http://identifiers.org/rhea/11708; RHEA: http://identifiers.org/rhea/11709; RHEA: http://identifiers.org/rhea/11710; RHEA: http://identifiers.org/rhea/11711; BioCyc: http://identifiers.org/biocyc/META:IMP-DEHYDROG-RXN; MetaNetX (MNX) Equation: http://identifiers.org/metanetx.reaction/MNXR100830; Reactome Reaction: http://identifiers.org/r…
	r0362	AMP:diphosphate phospho-D-ribosyltransferase	5-phospho-alpha-d-ribose 1-diphosphate[c] + adenine[c] => amp[c] + diphosphate[c]	2.4.2.7	CCM_00088 or CCM_02051	0	1000			kegg.reaction/R00190	Purine metabolism		Purine metabolism		2	ADPT	RHEA: http://identifiers.org/rhea/16609; RHEA: http://identifiers.org/rhea/16610; RHEA: http://identifiers.org/rhea/16611; RHEA: http://identifiers.org/rhea/16612; EC Number: http://identifiers.org/ec-code/2.4.2.7; EC Number: http://identifiers.org/ec-code/2.4.2.8; BioCyc: http://identifiers.org/biocyc/META:ADENPRIBOSYLTRAN-RXN; MetaNetX (MNX) Equation: http://identifiers.org/metanetx.reaction/MN…
	r0372	XMP:pyrophosphate phosphoribosyltransferase	5-phospho-alpha-d-ribose 1-diphosphate[c] + xanthine[c] => diphosphate[c] + xanthosine 5'-phosphate[c]	2.4.2.22	CCM_05303	0	1000			kegg.reaction/R02142	Purine metabolism		Purine metabolism		2	XPPT	RHEA: http://identifiers.org/rhea/10800; RHEA: http://identifiers.org/rhea/10801; RHEA: http://identifiers.org/rhea/10802; RHEA: http://identifiers.org/rhea/10803; EC Number: http://identifiers.org/ec-code/2.4.2.22; EC Number: http://identifiers.org/ec-code/2.4.2.8; BioCyc: http://identifiers.org/biocyc/META:XANPRIBOSYLTRAN-RXN; MetaNetX (MNX) Equation: http://identifiers.org/metanetx.reaction/MN…
	r0373	ATP:adenosine 5'-phosphotransferase	adenosine[c] + atp[c] => adp[c] + amp[c]	2.7.1.20;2.7.1.20;2.7.1.74	CCM_02716	0	1000			kegg.reaction/R00185	Purine metabolism		Purine metabolism		2	ADNK1	EC Number: http://identifiers.org/ec-code/2.7.1.20; EC Number: http://identifiers.org/ec-code/2.7.1.74; RHEA: http://identifiers.org/rhea/20824; RHEA: http://identifiers.org/rhea/20825; RHEA: http://identifiers.org/rhea/20826; RHEA: http://identifiers.org/rhea/20827; BioCyc: http://identifiers.org/biocyc/META:ADENOSINE-KINASE-RXN; MetaNetX (MNX) Equation: http://identifiers.org/metanetx.reaction/…
	r0374	ATP:AMP phosphotransferase	2 adp[c] <=> amp[c] + atp[c]	2.7.4.3	CCM_07479	-1000	1000			kegg.reaction/R00127	Purine metabolism		Purine metabolism		2	ADK1m	RHEA: http://identifiers.org/rhea/12973; RHEA: http://identifiers.org/rhea/12974; RHEA: http://identifiers.org/rhea/12975; RHEA: http://identifiers.org/rhea/12976; EC Number: http://identifiers.org/ec-code/2.7.4.3; BioCyc: http://identifiers.org/biocyc/META:ADENYL-KIN-RXN; MetaNetX (MNX) Equation: http://identifiers.org/metanetx.reaction/MNXR95450; Reactome Reaction: http://identifiers.org/reacto…
	r0375	adenylate kinase	adp[c] + gdp[c] <=> amp[c] + gtp[c]	2.7.4.3	CCM_07479	-1000	1000				Purine metabolism		Purine metabolism		2	DYTK2	MetaNetX (MNX) Equation: http://identifiers.org/metanetx.reaction/MNXR97835
	r0376	adenylate kinase	adp[c] + idp[c] <=> amp[c] + itp[c]	2.7.4.3	CCM_07479	-1000	1000				Purine metabolism		Purine metabolism		2	DYTK2	MetaNetX (MNX) Equation: http://identifiers.org/metanetx.reaction/MNXR97835
	r0377	adenylate kinase	2 adp[m] <=> amp[m] + atp[m]	2.7.4.3	CCM_04983	-1000	1000				Purine metabolism		Purine metabolism		2	DYTK2	MetaNetX (MNX) Equation: http://identifiers.org/metanetx.reaction/MNXR97835
	r0378	adenylate kinase	adp[m] + gdp[m] <=> amp[m] + gtp[m]	2.7.4.3	CCM_04983	-1000	1000				Purine metabolism		Purine metabolism		2	DYTK2	MetaNetX (MNX) Equation: http://identifiers.org/metanetx.reaction/MNXR97835
	r0379	ATP:dAMP phosphotransferase	adp[c] + dadp[c] <=> atp[c] + damp[c]	2.7.4.11	CCM_07479	-1000	1000			kegg.reaction/R01547	Purine metabolism		Purine metabolism		2	ATDAMh	EC Number: http://identifiers.org/ec-code/2.7.4.11; EC Number: http://identifiers.org/ec-code/2.7.4.13; EC Number: http://identifiers.org/ec-code/2.7.4.3; RHEA: http://identifiers.org/rhea/23100; RHEA: http://identifiers.org/rhea/23101; RHEA: http://identifiers.org/rhea/23102; RHEA: http://identifiers.org/rhea/23103; BioCyc: http://identifiers.org/biocyc/META:DEOXYADENYLATE-KINASE-RXN; MetaNetX (…
	r0381	ATP:inosine 5'-phosphotransferase	atp[c] + inosine[c] => adp[c] + imp[c]	2.7.1.73	CCM_02716	0	1000			kegg.reaction/R01131	Purine metabolism		Purine metabolism		2	INSK	EC Number: http://identifiers.org/ec-code/2.7.1.73; RHEA: http://identifiers.org/rhea/21140; RHEA: http://identifiers.org/rhea/21141; RHEA: http://identifiers.org/rhea/21142; RHEA: http://identifiers.org/rhea/21143; BioCyc: http://identifiers.org/biocyc/META:INOSINEKIN-RXN; MetaNetX (MNX) Equation: http://identifiers.org/metanetx.reaction/MNXR100845; KEGG Reaction: http://identifiers.org/kegg.rea…
	r0382	ATP:guanosine 5'-phosphotransferase	atp[c] + guanosine[c] => adp[c] + gmp[c]	2.7.1.73	CCM_02716	0	1000			kegg.reaction/R01228	Purine metabolism		Purine metabolism		2	GSNK	EC Number: http://identifiers.org/ec-code/2.7.1.73; RHEA: http://identifiers.org/rhea/27710; RHEA: http://identifiers.org/rhea/27711; RHEA: http://identifiers.org/rhea/27712; RHEA: http://identifiers.org/rhea/27713; BioCyc: http://identifiers.org/biocyc/META:GUANOSINEKIN-RXN; MetaNetX (MNX) Equation: http://identifiers.org/metanetx.reaction/MNXR100432; KEGG Reaction: http://identifiers.org/kegg.r…
	r0383	IMP:diphosphate phospho-D-ribosyltransferase	5-phospho-alpha-d-ribose 1-diphosphate[c] + hypoxanthine[c] => diphosphate[c] + imp[c]	2.4.2.8	CCM_05303	0	1000			kegg.reaction/R01132	Purine metabolism		Purine metabolism		2	HXPRT	RHEA: http://identifiers.org/rhea/17973; RHEA: http://identifiers.org/rhea/17974; RHEA: http://identifiers.org/rhea/17975; RHEA: http://identifiers.org/rhea/17976; EC Number: http://identifiers.org/ec-code/2.4.2.8; BioCyc: http://identifiers.org/biocyc/META:HYPOXANPRIBOSYLTRAN-RXN; MetaNetX (MNX) Equation: http://identifiers.org/metanetx.reaction/MNXR100752; KEGG Reaction: http://identifiers.org/…
	r0384	GMP:diphosphate 5-phospho-alpha-D-ribosyltransferase	5-phospho-alpha-d-ribose 1-diphosphate[c] + guanine[c] => diphosphate[c] + gmp[c]	2.4.2.8	CCM_05303	0	1000			kegg.reaction/R01229	Purine metabolism		Purine metabolism		2	GPAR	EC Number: http://identifiers.org/ec-code/2.4.2.22; EC Number: http://identifiers.org/ec-code/2.4.2.7; EC Number: http://identifiers.org/ec-code/2.4.2.8; RHEA: http://identifiers.org/rhea/25424; RHEA: http://identifiers.org/rhea/25425; RHEA: http://identifiers.org/rhea/25426; RHEA: http://identifiers.org/rhea/25427; BioCyc: http://identifiers.org/biocyc/META:GUANPRIBOSYLTRAN-RXN; MetaNetX (MNX) E…
	r0385	2'-deoxyadenosine 5'-monophosphate phosphohydrolase	damp[c] + h2o[c] => deoxyadenosine[c] + phosphate[c]	3.1.3.5	CCM_00622 or CCM_04644 or CCM_02831 or CCM_04317	0	1000			kegg.reaction/R02088	Purine metabolism		Purine metabolism		2	DAMPPH
	r0386	2'-deoxyguanosine 5'-monophosphate phosphohydrolase	dgmp[c] + h2o[c] => deoxyguanosine[c] + phosphate[c]	3.1.3.5	CCM_00622 or CCM_04644 or CCM_02831 or CCM_04317	0	1000			kegg.reaction/R01968	Purine metabolism		Purine metabolism		2	NTD8	RHEA: http://identifiers.org/rhea/29379; RHEA: http://identifiers.org/rhea/29380; RHEA: http://identifiers.org/rhea/29381; RHEA: http://identifiers.org/rhea/29382; EC Number: http://identifiers.org/ec-code/3.1.3.5; EC Number: http://identifiers.org/ec-code/3.1.3.89; BioCyc: http://identifiers.org/biocyc/META:RXN-14142; MetaNetX (MNX) Equation: http://identifiers.org/metanetx.reaction/MNXR102038; …
	r0387	adenosine 5'-monophosphate phosphohydrolase	amp[c] + h2o[c] => adenosine[c] + phosphate[c]	3.1.3.5	CCM_00622 or CCM_04644 or CCM_02831 or CCM_04317	0	1000			kegg.reaction/R00183	Purine metabolism		Purine metabolism		2	NTD7	RHEA: http://identifiers.org/rhea/29375; RHEA: http://identifiers.org/rhea/29376; RHEA: http://identifiers.org/rhea/29377; RHEA: http://identifiers.org/rhea/29378; EC Number: http://identifiers.org/ec-code/3.1.3.5; BioCyc: http://identifiers.org/biocyc/META:AMP-DEPHOSPHORYLATION-RXN; MetaNetX (MNX) Equation: http://identifiers.org/metanetx.reaction/MNXR102037; Reactome Reaction: http://identifier…
	r0388	guanosine 5'-monophosphate phosphohydrolase	gmp[c] + h2o[c] => guanosine[c] + phosphate[c]	3.1.3.5	CCM_00622 or CCM_04644 or CCM_02831 or CCM_04317	0	1000			kegg.reaction/R01227	Purine metabolism		Purine metabolism		2	NTD9	RHEA: http://identifiers.org/rhea/27714; RHEA: http://identifiers.org/rhea/27715; RHEA: http://identifiers.org/rhea/27716; RHEA: http://identifiers.org/rhea/27717; EC Number: http://identifiers.org/ec-code/3.1.3.5; BioCyc: http://identifiers.org/biocyc/META:RXN-7609; MetaNetX (MNX) Equation: http://identifiers.org/metanetx.reaction/MNXR100381; KEGG Reaction: http://identifiers.org/kegg.reaction/R…
	r0389	Inosine 5'-monophosphate phosphohydrolase	h2o[c] + imp[c] => inosine[c] + phosphate[c]	3.1.3.5;3.1.3.5;3.1.3.99	CCM_00622 or CCM_04644 or CCM_06504 or CCM_02831 or CCM_04317	0	1000			kegg.reaction/R01126	Purine metabolism		Purine metabolism		2	NTD11pp	RHEA: http://identifiers.org/rhea/27718; RHEA: http://identifiers.org/rhea/27719; RHEA: http://identifiers.org/rhea/27720; RHEA: http://identifiers.org/rhea/27721; EC Number: http://identifiers.org/ec-code/3.1.3.5; EC Number: http://identifiers.org/ec-code/3.1.3.99; BioCyc: http://identifiers.org/biocyc/META:RXN-7607; MetaNetX (MNX) Equation: http://identifiers.org/metanetx.reaction/MNXR102030; R…
	r0390	xanthosine 5'-phosphate phosphohydrolase	h2o[c] + xanthosine 5'-phosphate[c] => phosphate[c] + xanthosine[c]	3.1.3.5	CCM_00622 or CCM_04644 or CCM_02831 or CCM_04317	0	1000			kegg.reaction/R02719	Purine metabolism		Purine metabolism		2	NTD10	RHEA: http://identifiers.org/rhea/28530; RHEA: http://identifiers.org/rhea/28531; RHEA: http://identifiers.org/rhea/28532; RHEA: http://identifiers.org/rhea/28533; EC Number: http://identifiers.org/ec-code/3.1.3.5; BioCyc: http://identifiers.org/biocyc/META:XMPXAN-RXN; MetaNetX (MNX) Equation: http://identifiers.org/metanetx.reaction/MNXR102029; KEGG Reaction: http://identifiers.org/kegg.reaction…
	r0391	2'-deoxyadenosine 5'-diphosphate:oxidized-thioredoxin 2'-oxidoreductase	adp[c] + thioredoxin dithiol[c] => dadp[c] + h2o[c] + thioredoxin disulfide[c]	1.17.4.1	CCM_01863	0	1000			kegg.reaction/R02017	Purine metabolism		Purine metabolism		2	RNDR1	EC Number: http://identifiers.org/ec-code/1.17.4.1; BioCyc: http://identifiers.org/biocyc/META:ADPREDUCT-RXN; MetaNetX (MNX) Equation: http://identifiers.org/metanetx.reaction/MNXR104060; KEGG Reaction: http://identifiers.org/kegg.reaction/R02017; SEED Reaction: http://identifiers.org/seed.reaction/rxn05231
	r0392	2'-deoxyguanosine 5'-diphosphate:oxidized-thioredoxin 2'-oxidoreductase	gdp[c] + thioredoxin dithiol[c] => dgdp[c] + h2o[c] + thioredoxin disulfide[c]	1.17.4.1	CCM_01863	0	1000			kegg.reaction/R02019	Purine metabolism		Purine metabolism		2	RNDR2	EC Number: http://identifiers.org/ec-code/1.17.4.1; BioCyc: http://identifiers.org/biocyc/META:GDPREDUCT-RXN; MetaNetX (MNX) Equation: http://identifiers.org/metanetx.reaction/MNXR104062; KEGG Reaction: http://identifiers.org/kegg.reaction/R02019; SEED Reaction: http://identifiers.org/seed.reaction/rxn05233
	r0393	2'-deoxycytidine diphosphate:oxidized-thioredoxin 2'-oxidoreductase	cdp[c] + thioredoxin dithiol[c] => dcdp[c] + h2o[c] + thioredoxin disulfide[c]	1.17.4.1	CCM_01863	0	1000			kegg.reaction/R02024	Purine metabolism		Purine metabolism		2	RNDR3	EC Number: http://identifiers.org/ec-code/1.17.4.1; BioCyc: http://identifiers.org/biocyc/META:CDPREDUCT-RXN; MetaNetX (MNX) Equation: http://identifiers.org/metanetx.reaction/MNXR104064; KEGG Reaction: http://identifiers.org/kegg.reaction/R02024; SEED Reaction: http://identifiers.org/seed.reaction/rxn06076
	r0394	2'-deoxyuridine 5'-diphosphate:oxidized-thioredoxin 2'-oxidoreductase	thioredoxin dithiol[c] + udp[c] => dudp[c] + h2o[c] + thioredoxin disulfide[c]	1.17.4.1	CCM_01863	0	1000			kegg.reaction/R02018	Purine metabolism		Purine metabolism		2	RNDR4	EC Number: http://identifiers.org/ec-code/1.17.4.1; BioCyc: http://identifiers.org/biocyc/META:UDPREDUCT-RXN; MetaNetX (MNX) Equation: http://identifiers.org/metanetx.reaction/MNXR104066; KEGG Reaction: http://identifiers.org/kegg.reaction/R02018; SEED Reaction: http://identifiers.org/seed.reaction/rxn06075
	r0395	GDP phosphohydrolase	gdp[c] + h2o[c] => gmp[c] + phosphate[c]	3.6.1.42;3.6.1.6	CCM_00441 or CCM_07752	0	1000			kegg.reaction/R00328	Purine metabolism		Purine metabolism		2	NDP3	RHEA: http://identifiers.org/rhea/22156; RHEA: http://identifiers.org/rhea/22157; RHEA: http://identifiers.org/rhea/22158; RHEA: http://identifiers.org/rhea/22159; EC Number: http://identifiers.org/ec-code/3.6.1.42; EC Number: http://identifiers.org/ec-code/3.6.1.5; EC Number: http://identifiers.org/ec-code/3.6.1.6; BioCyc: http://identifiers.org/biocyc/META:GUANOSINE-DIPHOSPHATASE-RXN; MetaNetX …
	r0397	ATP:dGDP phosphotransferase	adp[c] + dgtp[c] <=> atp[c] + dgdp[c]	2.7.4.6	CCM_07126	-1000	1000			kegg.reaction/R01857	Purine metabolism		Purine metabolism		2	NDPK5	EC Number: http://identifiers.org/ec-code/2.7.4.6; RHEA: http://identifiers.org/rhea/27690; RHEA: http://identifiers.org/rhea/27691; RHEA: http://identifiers.org/rhea/27692; RHEA: http://identifiers.org/rhea/27693; BioCyc: http://identifiers.org/biocyc/META:DGDPKIN-RXN; MetaNetX (MNX) Equation: http://identifiers.org/metanetx.reaction/MNXR96118; KEGG Reaction: http://identifiers.org/kegg.reaction…
	r0398	ATP:dADP phosphotransferase	adp[c] + datp[c] <=> atp[c] + dadp[c]	2.7.4.6	CCM_07126	-1000	1000			kegg.reaction/R01137	Purine metabolism		Purine metabolism		2	NDPK8m	EC Number: http://identifiers.org/ec-code/2.7.4.6; RHEA: http://identifiers.org/rhea/27674; RHEA: http://identifiers.org/rhea/27675; RHEA: http://identifiers.org/rhea/27676; RHEA: http://identifiers.org/rhea/27677; BioCyc: http://identifiers.org/biocyc/META:DADPKIN-RXN; MetaNetX (MNX) Equation: http://identifiers.org/metanetx.reaction/MNXR101940; KEGG Reaction: http://identifiers.org/kegg.reactio…
	r0399	ATP:GDP phosphotransferase	adp[c] + gtp[c] <=> atp[c] + gdp[c]	2.7.4.6	CCM_07126	-1000	1000			kegg.reaction/R00330	Purine metabolism		Purine metabolism		2	NDPK1	EC Number: http://identifiers.org/ec-code/2.7.4.6; RHEA: http://identifiers.org/rhea/27686; RHEA: http://identifiers.org/rhea/27687; RHEA: http://identifiers.org/rhea/27688; RHEA: http://identifiers.org/rhea/27689; BioCyc: http://identifiers.org/biocyc/META:GDPKIN-RXN; MetaNetX (MNX) Equation: http://identifiers.org/metanetx.reaction/MNXR96119; KEGG Reaction: http://identifiers.org/kegg.reaction/…
	r0400	ATP:IDP phosphotransferase	adp[c] + itp[c] <=> atp[c] + idp[c]	2.7.4.6	CCM_07126	-1000	1000			kegg.reaction/R00722	Purine metabolism		Purine metabolism		2	NDPK9	EC Number: http://identifiers.org/ec-code/2.7.4.6; RHEA: http://identifiers.org/rhea/30347; RHEA: http://identifiers.org/rhea/30348; RHEA: http://identifiers.org/rhea/30349; RHEA: http://identifiers.org/rhea/30350; BioCyc: http://identifiers.org/biocyc/META:RXN-14120; MetaNetX (MNX) Equation: http://identifiers.org/metanetx.reaction/MNXR101941; KEGG Reaction: http://identifiers.org/kegg.reaction/…
	r0401	ATP:GMP phosphotransferase	adp[c] + gdp[c] <=> atp[c] + gmp[c]	2.7.4.8	CCM_01767 or CCM_00231 or CCM_03107	-1000	1000			kegg.reaction/R00332	Purine metabolism		Purine metabolism		2	GK1	EC Number: http://identifiers.org/ec-code/2.7.4.8; RHEA: http://identifiers.org/rhea/20780; RHEA: http://identifiers.org/rhea/20781; RHEA: http://identifiers.org/rhea/20782; RHEA: http://identifiers.org/rhea/20783; BioCyc: http://identifiers.org/biocyc/META:GUANYL-KIN-RXN; MetaNetX (MNX) Equation: http://identifiers.org/metanetx.reaction/MNXR100144; KEGG Reaction: http://identifiers.org/kegg.reac…
	r0402	ATP:dGMP phosphotransferase	adp[c] + dgdp[c] <=> atp[c] + dgmp[c]	2.7.4.8	CCM_01767 or CCM_00231 or CCM_03107	-1000	1000			kegg.reaction/R02090	Purine metabolism		Purine metabolism		2	DGK1	RHEA: http://identifiers.org/rhea/12697; RHEA: http://identifiers.org/rhea/12698; RHEA: http://identifiers.org/rhea/12699; RHEA: http://identifiers.org/rhea/12700; EC Number: http://identifiers.org/ec-code/2.7.4.12; EC Number: http://identifiers.org/ec-code/2.7.4.13; EC Number: http://identifiers.org/ec-code/2.7.4.8; BioCyc: http://identifiers.org/biocyc/META:GMKALT-RXN; MetaNetX (MNX) Equation: …
	r0403	guanylate kinase	dadp[c] + gdp[c] <=> datp[c] + gmp[c]	2.7.4.8	CCM_01767 or CCM_00231 or CCM_03107	-1000	1000				Purine metabolism		Purine metabolism		2	DGK1	RHEA: http://identifiers.org/rhea/12697; RHEA: http://identifiers.org/rhea/12698; RHEA: http://identifiers.org/rhea/12699; RHEA: http://identifiers.org/rhea/12700; EC Number: http://identifiers.org/ec-code/2.7.4.12; EC Number: http://identifiers.org/ec-code/2.7.4.13; EC Number: http://identifiers.org/ec-code/2.7.4.8; BioCyc: http://identifiers.org/biocyc/META:GMKALT-RXN; MetaNetX (MNX) Equation: …
	r0408	nucleoside triphosphatase	dgtp[c] + 3 h2o[c] => deoxyguanosine[c] + 3 phosphate[c]	3.6.1.15	CCM_04282	0	1000				Pyrimidine metabolism		Pyrimidine metabolism		2	NTP4	EC Number: http://identifiers.org/ec-code/3.6.1; EC Number: http://identifiers.org/ec-code/3.6.1.15; BioCyc: http://identifiers.org/biocyc/META:RXN-14217; MetaNetX (MNX) Equation: http://identifiers.org/metanetx.reaction/MNXR102044; SEED Reaction: http://identifiers.org/seed.reaction/rxn09516
	r0409	carbamoyl-phosphate:L-aspartate carbamoyltransferase	carbamoyl phosphate[c] + l-aspartate[c] => n-carbamoyl-l-aspartate[c] + phosphate[c]	2.1.3.2;2.1.3.2	(CCM_07055 and CCM_04127 and CCM_04128)	0	1000			kegg.reaction/R01397	Pyrimidine metabolism		Pyrimidine metabolism		2	ASPCT_1	EC Number: http://identifiers.org/ec-code/2.1.3.2; RHEA: http://identifiers.org/rhea/20013; RHEA: http://identifiers.org/rhea/20014; RHEA: http://identifiers.org/rhea/20015; RHEA: http://identifiers.org/rhea/20016; BioCyc: http://identifiers.org/biocyc/META:ASPCARBTRANS-RXN; MetaNetX (MNX) Equation: http://identifiers.org/metanetx.reaction/MNXR96080; Reactome Reaction: http://identifiers.org/reac…
	r0410	(S)-dihydroorotate amidohydrolase	(s)-dihydroorotate[c] + h2o[c] <=> n-carbamoyl-l-aspartate[c]	3.5.2.3	CCM_08454	-1000	1000			kegg.reaction/R01993	Pyrimidine metabolism		Pyrimidine metabolism		2	DHORTSn	RHEA: http://identifiers.org/rhea/24296; RHEA: http://identifiers.org/rhea/24297; RHEA: http://identifiers.org/rhea/24298; RHEA: http://identifiers.org/rhea/24299; EC Number: http://identifiers.org/ec-code/3.5.2.3; BioCyc: http://identifiers.org/biocyc/META:DIHYDROOROT-RXN; MetaNetX (MNX) Equation: http://identifiers.org/metanetx.reaction/MNXR97428; Reactome Reaction: http://identifiers.org/react…
	r0411	(S)-dihydroorotate:oxygen oxidoreductase	(s)-dihydroorotate[m] + o2[m] <=> h2o2[m] + orotate[m]	1.3.3.1	CCM_07548	-1000	1000			kegg.reaction/R01867	Pyrimidine metabolism		Pyrimidine metabolism		2	DHORDfum	EC Number: http://identifiers.org/ec-code/1.3.98.1; RHEA: http://identifiers.org/rhea/30059; RHEA: http://identifiers.org/rhea/30060; RHEA: http://identifiers.org/rhea/30061; RHEA: http://identifiers.org/rhea/30062; BioCyc: http://identifiers.org/biocyc/META:RXN-9929; MetaNetX (MNX) Equation: http://identifiers.org/metanetx.reaction/MNXR97425; KEGG Reaction: http://identifiers.org/kegg.reaction/R…
	r0412	orotidine-5'-phosphate:diphosphate-phospho-alpha-D-ribosyl-transferase	5-phospho-alpha-d-ribose 1-diphosphate[c] + orotate[c] <=> diphosphate[c] + orotidine 5'-phosphate[c]	2.4.2.10	CCM_04338	-1000	1000			kegg.reaction/R01870	Pyrimidine metabolism		Pyrimidine metabolism		2	ORPT	RHEA: http://identifiers.org/rhea/10380; RHEA: http://identifiers.org/rhea/10381; RHEA: http://identifiers.org/rhea/10382; RHEA: http://identifiers.org/rhea/10383; EC Number: http://identifiers.org/ec-code/2.4.2.10; BioCyc: http://identifiers.org/biocyc/META:OROPRIBTRANS-RXN; MetaNetX (MNX) Equation: http://identifiers.org/metanetx.reaction/MNXR102231; Reactome Reaction: http://identifiers.org/re…
	r0414	ATP:UMP phosphotransferase	adp[c] + udp[c] <=> atp[c] + ump[c]	2.7.4.22	CCM_02335	-1000	1000			kegg.reaction/R00158	Pyrimidine metabolism		Pyrimidine metabolism		2	UMPKm	EC Number: http://identifiers.org/ec-code/2.7.4.14; EC Number: http://identifiers.org/ec-code/2.7.4.22; EC Number: http://identifiers.org/ec-code/2.7.4.4; RHEA: http://identifiers.org/rhea/24400; RHEA: http://identifiers.org/rhea/24401; RHEA: http://identifiers.org/rhea/24402; RHEA: http://identifiers.org/rhea/24403; BioCyc: http://identifiers.org/biocyc/META:RXN-12002; MetaNetX (MNX) Equation: h…
	r0415	UMP:diphosphate phospho-alpha-D-ribosyltransferase	5-phospho-alpha-d-ribose 1-diphosphate[c] + uracil[c] => diphosphate[c] + ump[c]	2.4.2.9	CCM_02534	0	1000			kegg.reaction/R00966	Pyrimidine metabolism		Pyrimidine metabolism		2	UPPRT	RHEA: http://identifiers.org/rhea/13017; RHEA: http://identifiers.org/rhea/13018; RHEA: http://identifiers.org/rhea/13019; RHEA: http://identifiers.org/rhea/13020; EC Number: http://identifiers.org/ec-code/2.4.2.9; BioCyc: http://identifiers.org/biocyc/META:URACIL-PRIBOSYLTRANS-RXN; MetaNetX (MNX) Equation: http://identifiers.org/metanetx.reaction/MNXR105142; KEGG Reaction: http://identifiers.org…
	r0416	GTP:uridine 5'-phosphotransferase	gdp[c] + ump[c] <=> gtp[c] + uridine[c]	2.7.1.48	CCM_00401	-1000	1000			kegg.reaction/R00968	Pyrimidine metabolism		Pyrimidine metabolism		2	URIK2	EC Number: http://identifiers.org/ec-code/2.7.1.48; RHEA: http://identifiers.org/rhea/27650; RHEA: http://identifiers.org/rhea/27651; RHEA: http://identifiers.org/rhea/27652; RHEA: http://identifiers.org/rhea/27653; BioCyc: http://identifiers.org/biocyc/META:URKI-RXN; MetaNetX (MNX) Equation: http://identifiers.org/metanetx.reaction/MNXR105163; KEGG Reaction: http://identifiers.org/kegg.reaction/…
	r0417	GTP:cytidine 5'-phosphotransferase	cytidine[c] + gtp[c] => cmp[c] + gdp[c]	2.7.1.48	CCM_00401	0	1000			kegg.reaction/R00517	Pyrimidine metabolism		Pyrimidine metabolism		2	CYTDK2	EC Number: http://identifiers.org/ec-code/2.7.1.213; EC Number: http://identifiers.org/ec-code/2.7.1.48; RHEA: http://identifiers.org/rhea/28162; RHEA: http://identifiers.org/rhea/28163; RHEA: http://identifiers.org/rhea/28164; RHEA: http://identifiers.org/rhea/28165; BioCyc: http://identifiers.org/biocyc/META:CYTIDINEKIN-RXN; MetaNetX (MNX) Equation: http://identifiers.org/metanetx.reaction/MNXR…
	r0418	ATP:uridine 5'-phosphotransferase	atp[c] + uridine[c] => adp[c] + ump[c]	2.7.1.48;2.7.1.213;2.7.1.48	CCM_00401	0	1000			kegg.reaction/R00964	Pyrimidine metabolism		Pyrimidine metabolism		2	URIK1	RHEA: http://identifiers.org/rhea/16825; RHEA: http://identifiers.org/rhea/16826; RHEA: http://identifiers.org/rhea/16827; RHEA: http://identifiers.org/rhea/16828; EC Number: http://identifiers.org/ec-code/2.7.1.213; EC Number: http://identifiers.org/ec-code/2.7.1.48; BioCyc: http://identifiers.org/biocyc/META:URIDINEKIN-RXN; MetaNetX (MNX) Equation: http://identifiers.org/metanetx.reaction/MNXR1…
	r0420	5,10-methylenetetrahydrofolate:dUMP C-methyltransferase	5,10-methylenetetrahydrofolate[c] + dump[c] => dihydrofolate[c] + dtmp[c]	2.1.1.45;2.1.1.45	CCM_02881	0	1000			kegg.reaction/R02101	Pyrimidine metabolism		Pyrimidine metabolism		2	TMDS	RHEA: http://identifiers.org/rhea/12104; RHEA: http://identifiers.org/rhea/12105; RHEA: http://identifiers.org/rhea/12106; RHEA: http://identifiers.org/rhea/12107; EC Number: http://identifiers.org/ec-code/2.1.1.45; MetaNetX (MNX) Equation: http://identifiers.org/metanetx.reaction/MNXR104889; KEGG Reaction: http://identifiers.org/kegg.reaction/R02101
	r0421	UTP:L-glutamine amido-ligase (ADP-forming)	atp[c] + h2o[c] + l-glutamine[c] + utp[c] => adp[c] + ctp[c] + l-glutamate[c] + phosphate[c]	6.3.4.2;6.3.4.2	CCM_03686	0	1000			kegg.reaction/R00573	Pyrimidine metabolism		Pyrimidine metabolism		2	CTPS2	RHEA: http://identifiers.org/rhea/26426; RHEA: http://identifiers.org/rhea/26427; RHEA: http://identifiers.org/rhea/26428; RHEA: http://identifiers.org/rhea/26429; EC Number: http://identifiers.org/ec-code/6.3.4.2; BioCyc: http://identifiers.org/biocyc/META:CTPSYN-RXN; MetaNetX (MNX) Equation: http://identifiers.org/metanetx.reaction/MNXR96945; Reactome Reaction: http://identifiers.org/reactome/R…
	r0422	UTP:ammonia ligase (ADP-forming)	atp[c] + nh3[c] + utp[c] => adp[c] + ctp[c] + phosphate[c]	6.3.4.2;6.3.4.2	CCM_03686	0	1000			kegg.reaction/R00571	Pyrimidine metabolism		Pyrimidine metabolism		2	CTPS1	RHEA: http://identifiers.org/rhea/16597; RHEA: http://identifiers.org/rhea/16598; RHEA: http://identifiers.org/rhea/16599; RHEA: http://identifiers.org/rhea/16600; EC Number: http://identifiers.org/ec-code/6.3.4.2; BioCyc: http://identifiers.org/biocyc/META:RXN-14325; MetaNetX (MNX) Equation: http://identifiers.org/metanetx.reaction/MNXR96944; KEGG Reaction: http://identifiers.org/kegg.reaction/R…
	r0423	uridine ribohydrolase	h2o[c] + uridine[c] => d-ribose[c] + uracil[c]	3.2.2.3;3.2.2.3	CCM_09682	0	1000			kegg.reaction/R01080	Pyrimidine metabolism		Pyrimidine metabolism		2	URIH	RHEA: http://identifiers.org/rhea/15577; RHEA: http://identifiers.org/rhea/15578; RHEA: http://identifiers.org/rhea/15579; RHEA: http://identifiers.org/rhea/15580; EC Number: http://identifiers.org/ec-code/3.2.2.3; BioCyc: http://identifiers.org/biocyc/META:URIDINE-NUCLEOSIDASE-RXN; MetaNetX (MNX) Equation: http://identifiers.org/metanetx.reaction/MNXR105161; KEGG Reaction: http://identifiers.org…
	r0424	uracil hydro-lyase (adding D-ribose 5-phosphate;pseudouridine-5'-phosphate-forming)	d-ribose 5-phosphate[c] + uracil[c] <=> h2o[c] + pseudouridine 5'-phosphate[c]	4.2.1.70	CCM_01461 or CCM_07786 or CCM_01461 or CCM_02503 or CCM_02684 or CCM_06297 or CCM_06732 or CCM_07777	-1000	1000			kegg.reaction/R01055	Pyrimidine metabolism		Pyrimidine metabolism		2
	r0425	hydrogen-carbonate:L-glutamine amido-ligase (ADP-forming, carbamate-phosphorylating)	2 atp[c] + co2[c] + 2 h2o[c] + l-glutamine[c] => 2 adp[c] + carbamoyl phosphate[c] + l-glutamate[c] + phosphate[c]	6.3.5.5	(CCM_04127 and CCM_04128 and CCM_07055)	0	1000			kegg.reaction/R00575	Pyrimidine metabolism		Pyrimidine metabolism		2	CBPS	RHEA: http://identifiers.org/rhea/18633; RHEA: http://identifiers.org/rhea/18634; RHEA: http://identifiers.org/rhea/18635; RHEA: http://identifiers.org/rhea/18636; EC Number: http://identifiers.org/ec-code/6.3.5.5; BioCyc: http://identifiers.org/biocyc/META:CARBPSYN-RXN; MetaNetX (MNX) Equation: http://identifiers.org/metanetx.reaction/MNXR96485; Reactome Reaction: http://identifiers.org/reactome…
	r0426	hydrogen-carbonate:L-glutamine amido-ligase (ADP-forming, carbamate-phosphorylating)	2 atp[m] + co2[m] + 2 h2o[m] + l-glutamine[m] => 2 adp[m] + carbamoyl phosphate[m] + l-glutamate[m] + phosphate[m]	6.3.5.5	(CCM_04127 and CCM_04128 and CCM_07055)	0	1000			kegg.reaction/R00575	Pyrimidine metabolism		Pyrimidine metabolism		2	CBPS	RHEA: http://identifiers.org/rhea/18633; RHEA: http://identifiers.org/rhea/18634; RHEA: http://identifiers.org/rhea/18635; RHEA: http://identifiers.org/rhea/18636; EC Number: http://identifiers.org/ec-code/6.3.5.5; BioCyc: http://identifiers.org/biocyc/META:CARBPSYN-RXN; MetaNetX (MNX) Equation: http://identifiers.org/metanetx.reaction/MNXR96485; Reactome Reaction: http://identifiers.org/reactome…
	r0427	2'-deoxyuridine 5'-monophosphate phosphohydrolase	dump[c] + h2o[c] => deoxyuridine[c] + phosphate[c]	3.1.3.5	CCM_00622 or CCM_04644 or CCM_02831 or CCM_04317	0	1000			kegg.reaction/R02102	Pyrimidine metabolism		Pyrimidine metabolism		2	NTD1m	RHEA: http://identifiers.org/rhea/29355; RHEA: http://identifiers.org/rhea/29356; RHEA: http://identifiers.org/rhea/29357; RHEA: http://identifiers.org/rhea/29358; EC Number: http://identifiers.org/ec-code/3.1.3.5; EC Number: http://identifiers.org/ec-code/3.1.3.89; BioCyc: http://identifiers.org/biocyc/META:RXN-14143; MetaNetX (MNX) Equation: http://identifiers.org/metanetx.reaction/MNXR102028; …
	r0428	thymidylate 5'-phosphohydrolase	dtmp[c] + h2o[c] => phosphate[c] + thymidine[c]	3.1.3.5	CCM_00622 or CCM_04644 or CCM_02831 or CCM_04317	0	1000			kegg.reaction/R01569	Pyrimidine metabolism		Pyrimidine metabolism		2	NTD5	RHEA: http://identifiers.org/rhea/11080; RHEA: http://identifiers.org/rhea/11081; RHEA: http://identifiers.org/rhea/11082; RHEA: http://identifiers.org/rhea/11083; EC Number: http://identifiers.org/ec-code/3.1.3.35; EC Number: http://identifiers.org/ec-code/3.1.3.5; EC Number: http://identifiers.org/ec-code/3.1.3.89; BioCyc: http://identifiers.org/biocyc/META:THYMIDYLATE-5-PHOSPHATASE-RXN; MetaNe…
	r0429	2'-deoxycytidine 5'-monophosphate phosphohydrolase	dcmp[c] + h2o[c] => deoxycytidine[c] + phosphate[c]	3.1.3.5	CCM_00622 or CCM_04644 or CCM_02831 or CCM_04317	0	1000			kegg.reaction/R01664	Pyrimidine metabolism		Pyrimidine metabolism		2	NTD3	RHEA: http://identifiers.org/rhea/29363; RHEA: http://identifiers.org/rhea/29364; RHEA: http://identifiers.org/rhea/29365; RHEA: http://identifiers.org/rhea/29366; EC Number: http://identifiers.org/ec-code/3.1.3.5; EC Number: http://identifiers.org/ec-code/3.1.3.89; BioCyc: http://identifiers.org/biocyc/META:RXN0-5292; MetaNetX (MNX) Equation: http://identifiers.org/metanetx.reaction/MNXR102033; …
	r0430	cytidine-5'-monophosphate phosphohydrolase	cmp[c] + h2o[c] => cytidine[c] + phosphate[c]	3.1.3.5	CCM_00622 or CCM_04644 or CCM_02831 or CCM_04317	0	1000			kegg.reaction/R00511	Pyrimidine metabolism		Pyrimidine metabolism		2	NTD4	RHEA: http://identifiers.org/rhea/29367; RHEA: http://identifiers.org/rhea/29368; RHEA: http://identifiers.org/rhea/29369; RHEA: http://identifiers.org/rhea/29370; EC Number: http://identifiers.org/ec-code/3.1.3.5; EC Number: http://identifiers.org/ec-code/3.1.3.91; BioCyc: http://identifiers.org/biocyc/META:RXN-14026; MetaNetX (MNX) Equation: http://identifiers.org/metanetx.reaction/MNXR102034; …
	r0431	uridine 5'-monophosphate phosphohydrolase	h2o[c] + ump[c] => phosphate[c] + uridine[c]	3.1.3.5	CCM_00622 or CCM_04644 or CCM_02831 or CCM_04317	0	1000			kegg.reaction/R00963	Pyrimidine metabolism		Pyrimidine metabolism		2	NTD2	RHEA: http://identifiers.org/rhea/29359; RHEA: http://identifiers.org/rhea/29360; RHEA: http://identifiers.org/rhea/29361; RHEA: http://identifiers.org/rhea/29362; EC Number: http://identifiers.org/ec-code/3.1.3.5; BioCyc: http://identifiers.org/biocyc/META:RXN-14025; MetaNetX (MNX) Equation: http://identifiers.org/metanetx.reaction/MNXR102032; KEGG Reaction: http://identifiers.org/kegg.reaction/…
	r0432	ribonucleoside-triphosphate reductase	atp[c] + thioredoxin dithiol[c] => datp[c] + h2o[c] + thioredoxin disulfide[c]	1.17.4.2	CCM_05761	0	1000				Pyrimidine metabolism		Pyrimidine metabolism		2	RNTR1	EC Number: http://identifiers.org/ec-code/1.17.4.2; MetaNetX (MNX) Equation: http://identifiers.org/metanetx.reaction/MNXR104070; KEGG Reaction: http://identifiers.org/kegg.reaction/R02014; SEED Reaction: http://identifiers.org/seed.reaction/rxn05232
	r0433	ribonucleoside-triphosphate reductase	gtp[c] + thioredoxin dithiol[c] => dgtp[c] + h2o[c] + thioredoxin disulfide[c]	1.17.4.2	CCM_05761	0	1000				Pyrimidine metabolism		Pyrimidine metabolism		2	RNTR1	EC Number: http://identifiers.org/ec-code/1.17.4.2; MetaNetX (MNX) Equation: http://identifiers.org/metanetx.reaction/MNXR104070; KEGG Reaction: http://identifiers.org/kegg.reaction/R02014; SEED Reaction: http://identifiers.org/seed.reaction/rxn05232
	r0434	ribonucleoside-triphosphate reductase	ctp[c] + thioredoxin dithiol[c] => dctp[c] + h2o[c] + thioredoxin disulfide[c]	1.17.4.2	CCM_05761	0	1000				Pyrimidine metabolism		Pyrimidine metabolism		2	RNTR1	EC Number: http://identifiers.org/ec-code/1.17.4.2; MetaNetX (MNX) Equation: http://identifiers.org/metanetx.reaction/MNXR104070; KEGG Reaction: http://identifiers.org/kegg.reaction/R02014; SEED Reaction: http://identifiers.org/seed.reaction/rxn05232
	r0435	ribonucleoside-triphosphate reductase	thioredoxin dithiol[c] + utp[c] => dutp[c] + h2o[c] + thioredoxin disulfide[c]	1.17.4.2	CCM_05761	0	1000				Pyrimidine metabolism		Pyrimidine metabolism		2	RNTR1	EC Number: http://identifiers.org/ec-code/1.17.4.2; MetaNetX (MNX) Equation: http://identifiers.org/metanetx.reaction/MNXR104070; KEGG Reaction: http://identifiers.org/kegg.reaction/R02014; SEED Reaction: http://identifiers.org/seed.reaction/rxn05232
	r0436	UDP phosphohydrolase	h2o[c] + udp[c] => phosphate[c] + ump[c]	3.6.1.6	CCM_07752 or CCM_00441	0	1000			kegg.reaction/R00155	Pyrimidine metabolism		Pyrimidine metabolism		2	NDP7	EC Number: http://identifiers.org/ec-code/3.1.3.2; EC Number: http://identifiers.org/ec-code/3.6.1.5; EC Number: http://identifiers.org/ec-code/3.6.1.6; EC Number: http://identifiers.org/ec-code/3.6.1.9; BioCyc: http://identifiers.org/biocyc/META:RXN-12197; MetaNetX (MNX) Equation: http://identifiers.org/metanetx.reaction/MNXR101931; KEGG Reaction: http://identifiers.org/kegg.reaction/R00155; SEE…
	r0437	ATP:dTMP phosphotransferase	adp[c] + dtdp[c] <=> atp[c] + dtmp[c]	2.7.4.9	CCM_09396	-1000	1000			kegg.reaction/R02094	Pyrimidine metabolism		Pyrimidine metabolism		2	DTMPK	RHEA: http://identifiers.org/rhea/13517; RHEA: http://identifiers.org/rhea/13518; RHEA: http://identifiers.org/rhea/13519; RHEA: http://identifiers.org/rhea/13520; EC Number: http://identifiers.org/ec-code/2.7.4.12; EC Number: http://identifiers.org/ec-code/2.7.4.13; EC Number: http://identifiers.org/ec-code/2.7.4.9; BioCyc: http://identifiers.org/biocyc/META:DTMPKI-RXN; MetaNetX (MNX) Equation: …
	r0438	ATP:dCMP phosphotransferase	adp[c] + dcdp[c] <=> atp[c] + dcmp[c]	2.7.4.14	CCM_02335	-1000	1000			kegg.reaction/R01665	Pyrimidine metabolism		Pyrimidine metabolism		2	CYTK2	EC Number: http://identifiers.org/ec-code/2.7.4.13; EC Number: http://identifiers.org/ec-code/2.7.4.14; EC Number: http://identifiers.org/ec-code/2.7.4.25; RHEA: http://identifiers.org/rhea/25094; RHEA: http://identifiers.org/rhea/25095; RHEA: http://identifiers.org/rhea/25096; RHEA: http://identifiers.org/rhea/25097; BioCyc: http://identifiers.org/biocyc/META:RXN-7913; MetaNetX (MNX) Equation: h…
	r0439	uridylate kinase	adp[c] + cdp[c] <=> atp[c] + cmp[c]	2.7.4.14	CCM_02335	-1000	1000				Pyrimidine metabolism		Pyrimidine metabolism		2
	r0441	nucleoside triphosphatase	gtp[c] + 3 h2o[c] => guanosine[c] + 3 phosphate[c]	3.6.1.15	CCM_04282	0	1000				Pyrimidine metabolism		Pyrimidine metabolism		2	NTP4	EC Number: http://identifiers.org/ec-code/3.6.1; EC Number: http://identifiers.org/ec-code/3.6.1.15; BioCyc: http://identifiers.org/biocyc/META:RXN-14217; MetaNetX (MNX) Equation: http://identifiers.org/metanetx.reaction/MNXR102044; SEED Reaction: http://identifiers.org/seed.reaction/rxn09516
	r0442	cytidine aminohydrolase	cytidine[c] + h2o[c] => nh3[c] + uridine[c]	3.5.4.5;3.5.4.5	CCM_02297	0	1000			kegg.reaction/R01878	Pyrimidine metabolism		Pyrimidine metabolism		2	CYTD	RHEA: http://identifiers.org/rhea/16069; RHEA: http://identifiers.org/rhea/16070; RHEA: http://identifiers.org/rhea/16071; RHEA: http://identifiers.org/rhea/16072; EC Number: http://identifiers.org/ec-code/3.5.4.5; BioCyc: http://identifiers.org/biocyc/META:CYTIDEAM2-RXN; MetaNetX (MNX) Equation: http://identifiers.org/metanetx.reaction/MNXR97039; KEGG Reaction: http://identifiers.org/kegg.reacti…
	r0443	ATP:UDP phosphotransferase	adp[c] + utp[c] <=> atp[c] + udp[c]	2.7.4.6	CCM_07126	-1000	1000			kegg.reaction/R00156	Pyrimidine metabolism		Pyrimidine metabolism		2	NDPK2	EC Number: http://identifiers.org/ec-code/2.7.4.6; RHEA: http://identifiers.org/rhea/25098; RHEA: http://identifiers.org/rhea/25099; RHEA: http://identifiers.org/rhea/25100; RHEA: http://identifiers.org/rhea/25101; BioCyc: http://identifiers.org/biocyc/META:UDPKIN-RXN; MetaNetX (MNX) Equation: http://identifiers.org/metanetx.reaction/MNXR101935; KEGG Reaction: http://identifiers.org/kegg.reaction…
	r0444	ATP:CDP phosphotransferase	adp[c] + ctp[c] <=> atp[c] + cdp[c]	2.7.4.6	CCM_07126	-1000	1000			kegg.reaction/R00570	Pyrimidine metabolism		Pyrimidine metabolism		2	NDPK3	EC Number: http://identifiers.org/ec-code/2.7.4.6; RHEA: http://identifiers.org/rhea/25237; RHEA: http://identifiers.org/rhea/25238; RHEA: http://identifiers.org/rhea/25239; RHEA: http://identifiers.org/rhea/25240; BioCyc: http://identifiers.org/biocyc/META:CDPKIN-RXN; MetaNetX (MNX) Equation: http://identifiers.org/metanetx.reaction/MNXR101936; KEGG Reaction: http://identifiers.org/kegg.reaction…
	r0445	ATP:dUDP phosphotransferase	adp[c] + dutp[c] <=> atp[c] + dudp[c]	2.7.4.6	CCM_07126	-1000	1000			kegg.reaction/R02331	Pyrimidine metabolism		Pyrimidine metabolism		2	NDPK6	EC Number: http://identifiers.org/ec-code/2.7.4.6; RHEA: http://identifiers.org/rhea/28582; RHEA: http://identifiers.org/rhea/28583; RHEA: http://identifiers.org/rhea/28584; RHEA: http://identifiers.org/rhea/28585; BioCyc: http://identifiers.org/biocyc/META:DUDPKIN-RXN; MetaNetX (MNX) Equation: http://identifiers.org/metanetx.reaction/MNXR101938; KEGG Reaction: http://identifiers.org/kegg.reactio…
	r0446	ATP:dCDP phosphotransferase	adp[c] + dctp[c] <=> atp[c] + dcdp[c]	2.7.4.6	CCM_07126	-1000	1000			kegg.reaction/R02326	Pyrimidine metabolism		Pyrimidine metabolism		2	NDPK7m	EC Number: http://identifiers.org/ec-code/2.7.4.6; RHEA: http://identifiers.org/rhea/27678; RHEA: http://identifiers.org/rhea/27679; RHEA: http://identifiers.org/rhea/27680; RHEA: http://identifiers.org/rhea/27681; BioCyc: http://identifiers.org/biocyc/META:DCDPKIN-RXN; MetaNetX (MNX) Equation: http://identifiers.org/metanetx.reaction/MNXR101939; KEGG Reaction: http://identifiers.org/kegg.reactio…
	r0447	nucleoside diphosphate kinase	adp[c] + dttp[c] <=> atp[c] + dtdp[c]	2.7.4.6	CCM_07126	-1000	1000				Pyrimidine metabolism		Pyrimidine metabolism		2	NDPK1	EC Number: http://identifiers.org/ec-code/2.7.4.6; RHEA: http://identifiers.org/rhea/27686; RHEA: http://identifiers.org/rhea/27687; RHEA: http://identifiers.org/rhea/27688; RHEA: http://identifiers.org/rhea/27689; BioCyc: http://identifiers.org/biocyc/META:GDPKIN-RXN; MetaNetX (MNX) Equation: http://identifiers.org/metanetx.reaction/MNXR96119; KEGG Reaction: http://identifiers.org/kegg.reaction/…
	r0448	dUTP nucleotidohydrolase	dutp[c] + h2o[c] => diphosphate[c] + dump[c]	3.6.1.23;3.6.1.-;3.6.1.23	CCM_03944 or CCM_05946	0	1000			kegg.reaction/R02100	Pyrimidine metabolism		Pyrimidine metabolism		2	DUTPDP	RHEA: http://identifiers.org/rhea/10248; RHEA: http://identifiers.org/rhea/10249; RHEA: http://identifiers.org/rhea/10250; RHEA: http://identifiers.org/rhea/10251; EC Number: http://identifiers.org/ec-code/3.6.1.-; EC Number: http://identifiers.org/ec-code/3.6.1.23; EC Number: http://identifiers.org/ec-code/3.6.1.9; BioCyc: http://identifiers.org/biocyc/META:DUTP-PYROP-RXN; MetaNetX (MNX) Equatio…
	r0450	dihydroorotate dehydrogenase	(s)-dihydroorotate[c] + ubiquinone[m] => orotate[c] + ubiquinol[m]	1.3.5.2	CCM_07548	0	1000				Pyrimidine metabolism		Pyrimidine metabolism		2
	r0451	nicotinamide amidohydrolase	h2o[c] + nicotinamide[c] <=> nh3[c] + nicotinate[c]	3.5.1.19	CCM_04993	-1000	1000			kegg.reaction/R01268	Nicotinate and nicotinamide metabolism		Nicotinate and nicotinamide metabolism		2	NNAM	RHEA: http://identifiers.org/rhea/14545; RHEA: http://identifiers.org/rhea/14546; RHEA: http://identifiers.org/rhea/14547; RHEA: http://identifiers.org/rhea/14548; EC Number: http://identifiers.org/ec-code/3.5.1.19; BioCyc: http://identifiers.org/biocyc/META:NICOTINAMID-RXN; MetaNetX (MNX) Equation: http://identifiers.org/metanetx.reaction/MNXR101977; KEGG Reaction: http://identifiers.org/kegg.re…
	r0452	NADPH:NAD+ oxidoreductase	nadh[m] + nadp(+)[m] => nad(+)[m] + nadph[m]	1.6.1.2	CCM_09408	0	1000			kegg.reaction/R00112	Nicotinate and nicotinamide metabolism		Nicotinate and nicotinamide metabolism		2	NNOR	EC Number: http://identifiers.org/ec-code/1.6.1.1; EC Number: http://identifiers.org/ec-code/1.6.1.2; EC Number: http://identifiers.org/ec-code/1.6.1.3; RHEA: http://identifiers.org/rhea/11692; RHEA: http://identifiers.org/rhea/11693; RHEA: http://identifiers.org/rhea/11694; RHEA: http://identifiers.org/rhea/11695; BioCyc: http://identifiers.org/biocyc/META:PYRNUTRANSHYDROGEN-RXN; MetaNetX (MNX) …
	r0453	ATP:NADH 2'-phosphotransferase	atp[m] + nadh[m] => adp[m] + nadph[m]	2.7.1.86	CCM_04929	0	1000			kegg.reaction/R00105	Nicotinate and nicotinamide metabolism		Nicotinate and nicotinamide metabolism		2
	r0454	NAD+ phosphohydrolase	h2o[m] + nad(+)[m] => amp[m] + nicotinamide mononucleotide[m]	3.6.1.22	CCM_07360	0	1000			kegg.reaction/R00103	Nicotinate and nicotinamide metabolism		Nicotinate and nicotinamide metabolism		2	NPH	RHEA: http://identifiers.org/rhea/11800; RHEA: http://identifiers.org/rhea/11801; RHEA: http://identifiers.org/rhea/11802; RHEA: http://identifiers.org/rhea/11803; EC Number: http://identifiers.org/ec-code/3.6.1.22; EC Number: http://identifiers.org/ec-code/3.6.1.9; BioCyc: http://identifiers.org/biocyc/META:NADPYROPHOSPHAT-RXN; MetaNetX (MNX) Equation: http://identifiers.org/metanetx.reaction/MN…
	r0455	ATP:nicotinamide-nucleotide adenylyltransferase	atp[c] + nicotinate d-ribonucleotide[c] => deamido-nad(+)[c] + diphosphate[c]	2.7.7.1;2.7.7.18;2.7.7.1;2.7.7.18	CCM_01141 or CCM_02189 or CCM_06858	0	1000			kegg.reaction/R03005	Nicotinate and nicotinamide metabolism		Nicotinate and nicotinamide metabolism		2	ANNAT	EC Number: http://identifiers.org/ec-code/2.7.7.1; EC Number: http://identifiers.org/ec-code/2.7.7.18; RHEA: http://identifiers.org/rhea/21360; RHEA: http://identifiers.org/rhea/21361; RHEA: http://identifiers.org/rhea/21362; RHEA: http://identifiers.org/rhea/21363; BioCyc: http://identifiers.org/biocyc/META:2.7.7.1-RXN; MetaNetX (MNX) Equation: http://identifiers.org/metanetx.reaction/MNXR95841;…
	r0456	deamido-NAD+:L-glutamine amido-ligase (AMP-forming)	atp[c] + deamido-nad(+)[c] + h2o[c] + l-glutamine[c] => amp[c] + diphosphate[c] + l-glutamate[c] + nad(+)[c]	6.3.5.1;6.3.5.1	CCM_04447	0	1000			kegg.reaction/R00257	Nicotinate and nicotinamide metabolism		Nicotinate and nicotinamide metabolism		2	DNGALh	RHEA: http://identifiers.org/rhea/24384; RHEA: http://identifiers.org/rhea/24385; RHEA: http://identifiers.org/rhea/24386; RHEA: http://identifiers.org/rhea/24387; EC Number: http://identifiers.org/ec-code/6.3.5.1; BioCyc: http://identifiers.org/biocyc/META:NAD-SYNTH-GLN-RXN; MetaNetX (MNX) Equation: http://identifiers.org/metanetx.reaction/MNXR97678; Reactome Reaction: http://identifiers.org/rea…
	r0457	nicotinate-nucleotide pyrophosphorylase	5-phospho-alpha-d-ribose 1-diphosphate[c] + quinolinate[c] => co2[c] + diphosphate[c] + nicotinate d-ribonucleotide[c]	2.4.2.19	CCM_05219	0	1000			kegg.reaction/R03348	Nicotinate and nicotinamide metabolism		Nicotinate and nicotinamide metabolism		2	NNDPRm	RHEA: http://identifiers.org/rhea/12733; RHEA: http://identifiers.org/rhea/12734; RHEA: http://identifiers.org/rhea/12735; RHEA: http://identifiers.org/rhea/12736; EC Number: http://identifiers.org/ec-code/2.4.2.19; BioCyc: http://identifiers.org/biocyc/META:QUINOPRIBOTRANS-RXN; MetaNetX (MNX) Equation: http://identifiers.org/metanetx.reaction/MNXR101980; Reactome Reaction: http://identifiers.org…
	r0458	ATP:NAD+ 2'-phosphotransferase	atp[c] + nad(+)[c] => adp[c] + nadp(+)[c]	2.7.1.23;2.7.1.23	CCM_05592 or CCM_06179	0	1000			kegg.reaction/R00104	Nicotinate and nicotinamide metabolism		Nicotinate and nicotinamide metabolism		2	NADK	RHEA: http://identifiers.org/rhea/18629; RHEA: http://identifiers.org/rhea/18630; RHEA: http://identifiers.org/rhea/18631; RHEA: http://identifiers.org/rhea/18632; EC Number: http://identifiers.org/ec-code/2.7.1.23; BioCyc: http://identifiers.org/biocyc/META:NAD-KIN-RXN; MetaNetX (MNX) Equation: http://identifiers.org/metanetx.reaction/MNXR101882; Reactome Reaction: http://identifiers.org/reactom…
	r0461	5,10-methylenetetrahydrofolate:3-methyl-2-oxobutanoate hydroxymethyltransferase	3-methyl-2-oxobutanoate[m] + 5,10-methylenetetrahydrofolate[m] + h2o[m] => 2-dehydropantoate[m] + tetrahydrofolate[m]	2.1.2.11	CCM_04063	0	1000			kegg.reaction/R01226	Coenzyme A and pantothenate biosynthesis		Coenzyme A and pantothenate biosynthesis		2	MTMOHT	RHEA: http://identifiers.org/rhea/11824; RHEA: http://identifiers.org/rhea/11825; RHEA: http://identifiers.org/rhea/11826; RHEA: http://identifiers.org/rhea/11827; EC Number: http://identifiers.org/ec-code/2.1.2.11; MetaNetX (MNX) Equation: http://identifiers.org/metanetx.reaction/MNXR101702; KEGG Reaction: http://identifiers.org/kegg.reaction/R01226
	r0463	ATP:pantothenate 4'-phosphotransferase	(r)-pantothenate[c] + atp[c] => (r)-4'-phosphopantothenate[c] + adp[c]	2.7.1.33;2.7.1.33	CCM_03267	0	1000			kegg.reaction/R03018	Coenzyme A and pantothenate biosynthesis		Coenzyme A and pantothenate biosynthesis		2	PNTK	RHEA: http://identifiers.org/rhea/16373; RHEA: http://identifiers.org/rhea/16374; RHEA: http://identifiers.org/rhea/16375; RHEA: http://identifiers.org/rhea/16376; EC Number: http://identifiers.org/ec-code/2.7.1.33; BioCyc: http://identifiers.org/biocyc/META:PANTOTHENATE-KIN-RXN; MetaNetX (MNX) Equation: http://identifiers.org/metanetx.reaction/MNXR103050; Reactome Reaction: http://identifiers.or…
	r0464	ATP:dephospho-CoA 3'-phosphotransferase	atp[c] + dephospho-coa[c] => adp[c] + coenzyme a[c]	2.7.1.24;2.7.1.24	CCM_07447	0	1000			kegg.reaction/R00130	Coenzyme A and pantothenate biosynthesis		Coenzyme A and pantothenate biosynthesis		2	DPCOAK	RHEA: http://identifiers.org/rhea/18245; RHEA: http://identifiers.org/rhea/18246; RHEA: http://identifiers.org/rhea/18247; RHEA: http://identifiers.org/rhea/18248; EC Number: http://identifiers.org/ec-code/2.7.1.24; BioCyc: http://identifiers.org/biocyc/META:DEPHOSPHOCOAKIN-RXN; MetaNetX (MNX) Equation: http://identifiers.org/metanetx.reaction/MNXR97762; Reactome Reaction: http://identifiers.org/…
	r0465	pyruvate:pyruvate acetaldehydetransferase (decarboxylating)	2 pyruvate[m] => 2-acetolactate[m] + co2[m]	2.2.1.6	(CCM_00646 and CCM_08845)	0	1000			kegg.reaction/R00006	Coenzyme A and pantothenate biosynthesis		Coenzyme A and pantothenate biosynthesis		2	ACLS	EC Number: http://identifiers.org/ec-code/2.2.1.6; RHEA: http://identifiers.org/rhea/25249; RHEA: http://identifiers.org/rhea/25250; RHEA: http://identifiers.org/rhea/25251; RHEA: http://identifiers.org/rhea/25252; BioCyc: http://identifiers.org/biocyc/META:ACETOLACTSYN-RXN; MetaNetX (MNX) Equation: http://identifiers.org/metanetx.reaction/MNXR95271; KEGG Reaction: http://identifiers.org/kegg.rea…
	r0470	proline dehydrogenase	l-proline[m] + nad(+)[m] => (s)-1-pyrroline-5-carboxylate[m] + nadh[m]	1.5.99.8	CCM_02842 or CCM_05526	0	1000				Porphyrin and chlorophyll metabolism		Porphyrin and chlorophyll metabolism		2	PROD2	EC Number: http://identifiers.org/ec-code/1.5.-.-; EC Number: http://identifiers.org/ec-code/1.5.99.8; RHEA: http://identifiers.org/rhea/26124; RHEA: http://identifiers.org/rhea/26125; RHEA: http://identifiers.org/rhea/26126; RHEA: http://identifiers.org/rhea/26127; MetaNetX (MNX) Equation: http://identifiers.org/metanetx.reaction/MNXR103187; KEGG Reaction: http://identifiers.org/kegg.reaction/R1…
	r0471	succinyl-CoA:glycine C-succinyltransferase (decarboxylating)	glycine[m] + succinyl-coa[m] => 5-aminolevulinate[m] + co2[m] + coenzyme a[m]	2.3.1.37	CCM_01504	0	1000			kegg.reaction/R00830	Porphyrin and chlorophyll metabolism		Porphyrin and chlorophyll metabolism		2	ALASm	RHEA: http://identifiers.org/rhea/12921; RHEA: http://identifiers.org/rhea/12922; RHEA: http://identifiers.org/rhea/12923; RHEA: http://identifiers.org/rhea/12924; EC Number: http://identifiers.org/ec-code/2.3.1.37; BioCyc: http://identifiers.org/biocyc/META:5-AMINOLEVULINIC-ACID-SYNTHASE-RXN; MetaNetX (MNX) Equation: http://identifiers.org/metanetx.reaction/MNXR95695; Reactome Reaction: http://i…
	r0472	5-aminolevulinate hydro-lyase (adding 5-aminolevulinate and cyclizing; porphobilinogen-forming)	2 5-aminolevulinate[c] => 2 h2o[c] + porphobilinogen[c]	4.2.1.24;4.2.1.24	CCM_00935	0	1000			kegg.reaction/R00036	Porphyrin and chlorophyll metabolism		Porphyrin and chlorophyll metabolism		2	PPBNGS	RHEA: http://identifiers.org/rhea/24064; RHEA: http://identifiers.org/rhea/24065; RHEA: http://identifiers.org/rhea/24066; RHEA: http://identifiers.org/rhea/24067; EC Number: http://identifiers.org/ec-code/4.2.1.24; BioCyc: http://identifiers.org/biocyc/META:PORPHOBILSYNTH-RXN; MetaNetX (MNX) Equation: http://identifiers.org/metanetx.reaction/MNXR103095; Reactome Reaction: http://identifiers.org/…
	r0473	porphobilinogen:(4-[2-carboxyethyl]-3-[carboxymethyl]pyrrol-2-yl)methyltransferase (hydrolysing)	h2o[c] + 4 porphobilinogen[c] => hydroxymethylbilane[c] + 4 nh3[c]	2.5.1.61;2.5.1.61	CCM_01870 or CCM_09407	0	1000			kegg.reaction/R00084	Porphyrin and chlorophyll metabolism		Porphyrin and chlorophyll metabolism		2	HMBS	RHEA: http://identifiers.org/rhea/13185; RHEA: http://identifiers.org/rhea/13186; RHEA: http://identifiers.org/rhea/13187; RHEA: http://identifiers.org/rhea/13188; EC Number: http://identifiers.org/ec-code/2.5.1.61; EC Number: http://identifiers.org/ec-code/4.3.1.8; BioCyc: http://identifiers.org/biocyc/META:OHMETHYLBILANESYN-RXN; MetaNetX (MNX) Equation: http://identifiers.org/metanetx.reaction/…
	r0474	hydroxymethylbilane hydro-lyase(cyclizing)	hydroxymethylbilane[c] => h2o[c] + uroporphyrinogen iii[c]	4.2.1.75;4.2.1.75	CCM_01233	0	1000			kegg.reaction/R03165	Porphyrin and chlorophyll metabolism		Porphyrin and chlorophyll metabolism		2	UPP3S_1	RHEA: http://identifiers.org/rhea/18965; RHEA: http://identifiers.org/rhea/18966; RHEA: http://identifiers.org/rhea/18967; RHEA: http://identifiers.org/rhea/18968; EC Number: http://identifiers.org/ec-code/4.2.1.75; BioCyc: http://identifiers.org/biocyc/META:UROGENIIISYN-RXN; MetaNetX (MNX) Equation: http://identifiers.org/metanetx.reaction/MNXR105139; Reactome Reaction: http://identifiers.org/re…
	r0475	uroporphyrinogen-III carboxy-lyase	uroporphyrinogen iii[c] => 4 co2[c] + coproporphyrinogen iii[c]	4.1.1.37;4.1.1.37	CCM_06673	0	1000			kegg.reaction/R03197	Porphyrin and chlorophyll metabolism		Porphyrin and chlorophyll metabolism		2	UPPDC1	RHEA: http://identifiers.org/rhea/19865; RHEA: http://identifiers.org/rhea/19866; RHEA: http://identifiers.org/rhea/19867; RHEA: http://identifiers.org/rhea/19868; EC Number: http://identifiers.org/ec-code/4.1.1.37; BioCyc: http://identifiers.org/biocyc/META:UROGENDECARBOX-RXN; MetaNetX (MNX) Equation: http://identifiers.org/metanetx.reaction/MNXR105140; Reactome Reaction: http://identifiers.org/…
	r0476	coproporphyrinogen:oxygen oxidoreductase(decarboxylating)	coproporphyrinogen iii[m] + o2[m] => 2 h2o[c] + protoporphyrinogen[c] + 2 co2[m]	1.3.3.3	CCM_07483	0	1000			kegg.reaction/R03220	Porphyrin and chlorophyll metabolism		Porphyrin and chlorophyll metabolism		2	CPPPGO	EC Number: http://identifiers.org/ec-code/1.3.3.3; RHEA: http://identifiers.org/rhea/18257; RHEA: http://identifiers.org/rhea/18258; RHEA: http://identifiers.org/rhea/18259; RHEA: http://identifiers.org/rhea/18260; BioCyc: http://identifiers.org/biocyc/META:RXN0-1461; MetaNetX (MNX) Equation: http://identifiers.org/metanetx.reaction/MNXR96880; KEGG Reaction: http://identifiers.org/kegg.reaction/R…
	r0478	protoheme ferro-lyase (protoporphyrin-forming)	protoporphyrin[m] => heme b[m]	4.99.1.1	CCM_03004	0	1000			kegg.reaction/R00310	Porphyrin and chlorophyll metabolism		Porphyrin and chlorophyll metabolism		2	FCLT	RHEA: http://identifiers.org/rhea/22584; RHEA: http://identifiers.org/rhea/22585; RHEA: http://identifiers.org/rhea/22586; RHEA: http://identifiers.org/rhea/22587; EC Number: http://identifiers.org/ec-code/4.99.1.1; BioCyc: http://identifiers.org/biocyc/META:PROTOHEMEFERROCHELAT-RXN; MetaNetX (MNX) Equation: http://identifiers.org/metanetx.reaction/MNXR99471; KEGG Reaction: http://identifiers.org…
	r0479	heme A farnesyltransferase	heme b[m] => heme o[m]	2.5.1.-	CCM_08191	0	1000			kegg.reaction/R07411	Porphyrin and chlorophyll metabolism		Porphyrin and chlorophyll metabolism		2	HEMEOS	EC Number: http://identifiers.org/ec-code/2.5.1.-; RHEA: http://identifiers.org/rhea/28070; RHEA: http://identifiers.org/rhea/28071; RHEA: http://identifiers.org/rhea/28072; RHEA: http://identifiers.org/rhea/28073; MetaNetX (MNX) Equation: http://identifiers.org/metanetx.reaction/MNXR100596; Reactome Reaction: http://identifiers.org/reactome/R-ATH-2995330; Reactome Reaction: http://identifiers.or…
	r0480	cytochrome oxidase assembly factor COX15	heme o[m] => heme a[m]		CCM_05057	0	1000				Porphyrin and chlorophyll metabolism		Porphyrin and chlorophyll metabolism		2
	r0481	S-adenosyl-L-methionine:uroporphyrinogen-III C-methyltransferase	s-adenosyl-l-methionine[c] + uroporphyrinogen iii[c] => precorrins[c] + s-adenosyl-l-homocysteine[c]	2.1.1.107	CCM_00963	0	1000			kegg.reaction/R07237	Porphyrin and chlorophyll metabolism		Porphyrin and chlorophyll metabolism		2	UPP3MT	EC Number: http://identifiers.org/ec-code/2.1.1.107; RHEA: http://identifiers.org/rhea/32459; RHEA: http://identifiers.org/rhea/32460; RHEA: http://identifiers.org/rhea/32461; RHEA: http://identifiers.org/rhea/32462; BioCyc: http://identifiers.org/biocyc/META:RXN-13403; MetaNetX (MNX) Equation: http://identifiers.org/metanetx.reaction/MNXR105137; KEGG Reaction: http://identifiers.org/kegg.reactio…
	r0482	S-adenosyl-L-methionine:uroporphyrin-III C-methyltransferase	nad(+)[c] + precorrins[c] => nadh[c] + sirohydrochlorin[c]	1.3.1.76	CCM_04648	0	1000			kegg.reaction/R03947	Porphyrin and chlorophyll metabolism		Porphyrin and chlorophyll metabolism		2	SHCHD2	EC Number: http://identifiers.org/ec-code/1.3.1.76; RHEA: http://identifiers.org/rhea/15613; RHEA: http://identifiers.org/rhea/15614; RHEA: http://identifiers.org/rhea/15615; RHEA: http://identifiers.org/rhea/15616; BioCyc: http://identifiers.org/biocyc/META:DIMETHUROPORDEHYDROG-RXN; MetaNetX (MNX) Equation: http://identifiers.org/metanetx.reaction/MNXR104373; KEGG Reaction: http://identifiers.or…
	r0483	S-adenosyl-L-methionine:uroporphyrin-III C-methyltransferase	sirohydrochlorin[c] => siroheme[c]	4.99.1.4	CCM_04648	0	1000			kegg.reaction/R02864	Porphyrin and chlorophyll metabolism		Porphyrin and chlorophyll metabolism		2	SHCHF	RHEA: http://identifiers.org/rhea/24360; RHEA: http://identifiers.org/rhea/24361; RHEA: http://identifiers.org/rhea/24362; RHEA: http://identifiers.org/rhea/24363; EC Number: http://identifiers.org/ec-code/4.99.1.4; BioCyc: http://identifiers.org/biocyc/META:SIROHEME-FERROCHELAT-RXN; MetaNetX (MNX) Equation: http://identifiers.org/metanetx.reaction/MNXR104375; KEGG Reaction: http://identifiers.or…
	r0485	(S)-4-amino-5-oxopentanoate 4,5-aminomutase	(s)-4-amino-5-oxopentanoate[c] => 5-aminolevulinate[c]	5.4.3.8	CCM_07021	0	1000			kegg.reaction/R02272	Porphyrin and chlorophyll metabolism		Porphyrin and chlorophyll metabolism		2	G1SAT	RHEA: http://identifiers.org/rhea/14265; RHEA: http://identifiers.org/rhea/14266; RHEA: http://identifiers.org/rhea/14267; RHEA: http://identifiers.org/rhea/14268; EC Number: http://identifiers.org/ec-code/5.4.3.8; BioCyc: http://identifiers.org/biocyc/META:GSAAMINOTRANS-RXN; MetaNetX (MNX) Equation: http://identifiers.org/metanetx.reaction/MNXR99850; KEGG Reaction: http://identifiers.org/kegg.re…
	r0486	biotin synthase	biotin[c] <=> dethiobiotin[c] + sulfur[c]	2.8.1.6	CCM_08607	-1000	1000				Biotin metabolism		Biotin metabolism		2	BTS4	EC Number: http://identifiers.org/ec-code/2.8.1.6; MetaNetX (MNX) Equation: http://identifiers.org/metanetx.reaction/MNXR138149
	r0487	6-carboxyhexanoyl-CoA:L-alanine C-carboxyhexanoyltransferase (decarboxylating)	l-alanine[c] + pimeloyl-coa[c] => 8-amino-7-oxononanoate[c] + co2[c] + coenzyme a[c]	2.3.1.47;2.3.1.47	CCM_08606	0	1000			kegg.reaction/R03210	Biotin metabolism		Biotin metabolism		2	AOXSr	EC Number: http://identifiers.org/ec-code/2.3.1.47; RHEA: http://identifiers.org/rhea/20712; RHEA: http://identifiers.org/rhea/20713; RHEA: http://identifiers.org/rhea/20714; RHEA: http://identifiers.org/rhea/20715; BioCyc: http://identifiers.org/biocyc/META:7KAPSYN-RXN; MetaNetX (MNX) Equation: http://identifiers.org/metanetx.reaction/MNXR95854; KEGG Reaction: http://identifiers.org/kegg.reactio…
	r0488	S-adenosyl-L-methionine:8-amino-7-oxononanoate aminotransferase	8-amino-7-oxononanoate[c] + s-adenosyl-l-methionine[c] => 7,8-diaminononanoate[c] + s-adenosyl-4-methylthio-2-oxobutanoate[c]	2.6.1.62;2.6.1.62	CCM_00296 or CCM_02890 or CCM_08605	0	1000			kegg.reaction/R03231	Biotin metabolism		Biotin metabolism		2	AMAOTr	RHEA: http://identifiers.org/rhea/16861; RHEA: http://identifiers.org/rhea/16862; RHEA: http://identifiers.org/rhea/16863; RHEA: http://identifiers.org/rhea/16864; EC Number: http://identifiers.org/ec-code/2.6.1.62; BioCyc: http://identifiers.org/biocyc/META:DAPASYN-RXN; MetaNetX (MNX) Equation: http://identifiers.org/metanetx.reaction/MNXR95806; KEGG Reaction: http://identifiers.org/kegg.reactio…
	r0491	biotin synthase	dethiobiotin[c] + 2 s-adenosyl-l-methionine[c] + sulfur[c] => biotin[c] + 2 deoxyadenosine[c] + 2 l-methionine[c]	2.8.1.6	CCM_05871	0	1000				Biotin metabolism		Biotin metabolism		2	BTS4	EC Number: http://identifiers.org/ec-code/2.8.1.6; MetaNetX (MNX) Equation: http://identifiers.org/metanetx.reaction/MNXR138149
	r0496	pyridoxal 5-phosphate synthase	d-glyceraldehyde 3-phosphate[c] + d-ribulose 5-phosphate[c] + l-glutamine[c] => 3 h2o[c] + l-glutamate[c] + phosphate[c] + pyridoxal 5'-phosphate[c]	2.6.-.-;4.-.-.-;4.3.3.6	CCM_03578 or CCM_03579	0	1000			kegg.reaction/R07456	Vitamin B6 metabolism		Vitamin B6 metabolism		2	PYDXS	EC Number: http://identifiers.org/ec-code/4.3.3.6; MetaNetX (MNX) Equation: http://identifiers.org/metanetx.reaction/MNXR103369; KEGG Reaction: http://identifiers.org/kegg.reaction/R07456; SEED Reaction: http://identifiers.org/seed.reaction/rxn05144
	r0497	ATP:pyridoxal 5'-phosphotransferase	atp[c] + pyridoxamine[c] => adp[c] + pyridoxamine 5'-phosphate[c]	2.7.1.35;2.7.1.35	CCM_05945	0	1000			kegg.reaction/R02493	Vitamin B6 metabolism		Vitamin B6 metabolism		2	PYDAMK	EC Number: http://identifiers.org/ec-code/2.7.1.35; RHEA: http://identifiers.org/rhea/25104; RHEA: http://identifiers.org/rhea/25105; RHEA: http://identifiers.org/rhea/25106; RHEA: http://identifiers.org/rhea/25107; BioCyc: http://identifiers.org/biocyc/META:PYRAMKIN-RXN; MetaNetX (MNX) Equation: http://identifiers.org/metanetx.reaction/MNXR103357; Reactome Reaction: http://identifiers.org/reacto…
	r0498	ATP:pyridoxal 5'-phosphotransferase	atp[c] + pyridoxal[c] => adp[c] + pyridoxal 5'-phosphate[c]	2.7.1.35;2.7.1.35	CCM_05945	0	1000			kegg.reaction/R00174	Vitamin B6 metabolism		Vitamin B6 metabolism		2	PYDXK	RHEA: http://identifiers.org/rhea/10224; RHEA: http://identifiers.org/rhea/10225; RHEA: http://identifiers.org/rhea/10226; RHEA: http://identifiers.org/rhea/10227; EC Number: http://identifiers.org/ec-code/2.7.1.35; BioCyc: http://identifiers.org/biocyc/META:PYRIDOXKIN-RXN; MetaNetX (MNX) Equation: http://identifiers.org/metanetx.reaction/MNXR103361; Reactome Reaction: http://identifiers.org/reac…
	r0499	pyridoxamine-5'-phosphate:oxygen oxidoreductase (deaminating)	h2o[c] + o2[c] + pyridoxamine 5'-phosphate[c] => h2o2[c] + nh3[c] + pyridoxal 5'-phosphate[c]	1.4.3.5	CCM_03430 or CCM_04235	0	1000			kegg.reaction/R00277	Vitamin B6 metabolism		Vitamin B6 metabolism		2	PYAM5PO	EC Number: http://identifiers.org/ec-code/1.4.3.5; RHEA: http://identifiers.org/rhea/15817; RHEA: http://identifiers.org/rhea/15818; RHEA: http://identifiers.org/rhea/15819; RHEA: http://identifiers.org/rhea/15820; BioCyc: http://identifiers.org/biocyc/META:PMPOXI-RXN; MetaNetX (MNX) Equation: http://identifiers.org/metanetx.reaction/MNXR103355; Reactome Reaction: http://identifiers.org/reactome/…
	r0500	ATP:pyridoxine 5'-phosphotransferase	atp[c] + pyridoxine[c] => adp[c] + pyridoxine 5'-phosphate[c]	2.7.1.35;2.7.1.35	CCM_05945	0	1000			kegg.reaction/R01909	Vitamin B6 metabolism		Vitamin B6 metabolism		2	PYDXNK	EC Number: http://identifiers.org/ec-code/2.7.1.35; RHEA: http://identifiers.org/rhea/25108; RHEA: http://identifiers.org/rhea/25109; RHEA: http://identifiers.org/rhea/25110; RHEA: http://identifiers.org/rhea/25111; BioCyc: http://identifiers.org/biocyc/META:PNKIN-RXN; MetaNetX (MNX) Equation: http://identifiers.org/metanetx.reaction/MNXR103362; Reactome Reaction: http://identifiers.org/reactome/…
	r0501	pyridoxine 5-phosphate:oxygen oxidoreductase	o2[c] + pyridoxine 5'-phosphate[c] => h2o2[c] + pyridoxal 5'-phosphate[c]	1.4.3.5	CCM_04235 or CCM_03430	0	1000			kegg.reaction/R00278	Vitamin B6 metabolism		Vitamin B6 metabolism		2	PDX5POi	EC Number: http://identifiers.org/ec-code/1.4.3.5; RHEA: http://identifiers.org/rhea/15149; RHEA: http://identifiers.org/rhea/15150; RHEA: http://identifiers.org/rhea/15151; RHEA: http://identifiers.org/rhea/15152; BioCyc: http://identifiers.org/biocyc/META:PNPOXI-RXN; MetaNetX (MNX) Equation: http://identifiers.org/metanetx.reaction/MNXR102438; Reactome Reaction: http://identifiers.org/reactome/…
	r0502	pyridoxine:oxygen oxidoreductase (deaminating)	h2o2[c] + pyridoxal[c] <=> o2[c] + pyridoxine[c]	1.4.3.5	CCM_03430 or CCM_04235	-1000	1000			kegg.reaction/R01711	Vitamin B6 metabolism		Vitamin B6 metabolism		2	PYDXNO	EC Number: http://identifiers.org/ec-code/1.1.3.12; EC Number: http://identifiers.org/ec-code/1.4.3.5; RHEA: http://identifiers.org/rhea/15033; RHEA: http://identifiers.org/rhea/15034; RHEA: http://identifiers.org/rhea/15035; RHEA: http://identifiers.org/rhea/15036; BioCyc: http://identifiers.org/biocyc/META:PYRIDOXINE-4-OXIDASE-RXN; MetaNetX (MNX) Equation: http://identifiers.org/metanetx.reacti…
	r0503	pyridoxamine:oxygen oxidoreductase (deaminating)	h2o2[c] + nh3[c] + pyridoxal[c] <=> h2o[c] + o2[c] + pyridoxamine[c]	1.4.3.5	CCM_03430 or CCM_04235	-1000	1000			kegg.reaction/R01710	Vitamin B6 metabolism		Vitamin B6 metabolism		2	PYDXO_1	EC Number: http://identifiers.org/ec-code/1.4.3; EC Number: http://identifiers.org/ec-code/1.4.3.5; RHEA: http://identifiers.org/rhea/30775; RHEA: http://identifiers.org/rhea/30776; RHEA: http://identifiers.org/rhea/30777; RHEA: http://identifiers.org/rhea/30778; BioCyc: http://identifiers.org/biocyc/META:RXN-14203; MetaNetX (MNX) Equation: http://identifiers.org/metanetx.reaction/MNXR103367; KEG…
	r0506	polyisopentenylpyrolinate:4-hydroxybenzoate nonaprenyltransferase	4-hydroxybenzoate[c] + all-trans-polyprenyl diphosphate[c] => 4-hydroxy-3-polyprenylbenzoate[c] + diphosphate[c]	2.5.1.39	CCM_07474	0	1000			kegg.reaction/R05000	Ubiquinone and other terpenoid quinone biosynthesis		Ubiquinone and other terpenoid quinone biosynthesis		2	HBZOPT	EC Number: http://identifiers.org/ec-code/2.5.1.39; RHEA: http://identifiers.org/rhea/27782; RHEA: http://identifiers.org/rhea/27783; RHEA: http://identifiers.org/rhea/27784; RHEA: http://identifiers.org/rhea/27785; BioCyc: http://identifiers.org/biocyc/META:4OHBENZOATE-OCTAPRENYLTRANSFER-RXN; MetaNetX (MNX) Equation: http://identifiers.org/metanetx.reaction/MNXR100566; KEGG Reaction: http://iden…
	r0510	2-octaprenyl-6-methoxyphenol hydroxylase	2-polyprenyl-6-methoxyphenol[c] + o2[c] => 2-polyprenyl-6-methoxy-1,4-benzoquinone[c] + h2o[c]	1.14.13.-	CCM_02264	0	1000			kegg.reaction/R08773	Ubiquinone and other terpenoid quinone biosynthesis		Ubiquinone and other terpenoid quinone biosynthesis		2	OMPHHX	MetaNetX (MNX) Equation: http://identifiers.org/metanetx.reaction/MNXR138671; SEED Reaction: http://identifiers.org/seed.reaction/rxn09042
	r0511	ubiquinone biosynthesis methyltransferase	2-polyprenyl-6-methoxy-1,4-benzoquinone[c] + s-adenosyl-l-methionine[c] => 2-polyprenyl-3-methyl-6-methoxy-1,4-benzoquinone[c] + s-adenosyl-l-homocysteine[c]	2.1.1.201	CCM_00363	0	1000			kegg.reaction/R08774	Ubiquinone and other terpenoid quinone biosynthesis		Ubiquinone and other terpenoid quinone biosynthesis		2	URFGTT	EC Number: http://identifiers.org/ec-code/2.1.1.163; EC Number: http://identifiers.org/ec-code/2.1.1.201; RHEA: http://identifiers.org/rhea/26462; RHEA: http://identifiers.org/rhea/26463; RHEA: http://identifiers.org/rhea/26464; RHEA: http://identifiers.org/rhea/26465; BioCyc: http://identifiers.org/biocyc/META:RXN-14177; MetaNetX (MNX) Equation: http://identifiers.org/metanetx.reaction/MNXR10515…
	r0512	2-octaprenyl-3-methyl-6-methoxy-1,4-benzoquinol hydroxylase	2-polyprenyl-3-methyl-6-methoxy-1,4-benzoquinone[c] + nadph[c] + o2[c] => 2-polyprenyl-3-methyl-5-hydroxy-6-methoxy-1,4-benzoquinone[c] + h2o[c] + nadp(+)[c]	1.14.13.-	CCM_00523	0	1000			kegg.reaction/R08775	Ubiquinone and other terpenoid quinone biosynthesis		Ubiquinone and other terpenoid quinone biosynthesis		2	OMMBLHX	MetaNetX (MNX) Equation: http://identifiers.org/metanetx.reaction/MNXR138669; SEED Reaction: http://identifiers.org/seed.reaction/rxn09040
	r0514	L-cysteine:[ThiI] sulfurtransferase	cysteine-[enzyme][m] + l-cysteine[m] => l-alanine[m] + s-sulfanylcysteine-[enzyme][m]	2.8.1.7	CCM_08125 or CCM_09542	0	1000			kegg.reaction/R07460	Thiamine metabolism		Thiamine metabolism		2
	r0515	ATP:4-amino-2-methyl-5-phosphomethylpyrimidine phosphotransferase	4-amino-2-methyl-5-phosphomethylpyrimidine[c] + atp[c] => 4-amino-2-methyl-5-diphosphomethylpyrimidine[c] + adp[c]	2.7.4.7;2.7.4.7	CCM_09434	0	1000			kegg.reaction/R04509	Thiamine metabolism		Thiamine metabolism		2	PMPK	EC Number: http://identifiers.org/ec-code/2.7.4.7; MetaNetX (MNX) Equation: http://identifiers.org/metanetx.reaction/MNXR143305; SEED Reaction: http://identifiers.org/seed.reaction/rxn03108
	r0516	ATP:4-methyl-5-(2-hydroxyethyl)-thiazole 2-phosphotransferase	5-(2-hydroxyethyl)-4-methylthiazole[c] + atp[c] => 4-methyl-5-(2-phosphonooxyethyl)thiazole[c] + adp[c]	2.7.1.50;2.7.1.50	CCM_01506	0	1000			kegg.reaction/R04448	Thiamine metabolism		Thiamine metabolism		2	HETZK	EC Number: http://identifiers.org/ec-code/2.7.1.50; RHEA: http://identifiers.org/rhea/24212; RHEA: http://identifiers.org/rhea/24213; RHEA: http://identifiers.org/rhea/24214; RHEA: http://identifiers.org/rhea/24215; BioCyc: http://identifiers.org/biocyc/META:THIAZOLSYN3-RXN; MetaNetX (MNX) Equation: http://identifiers.org/metanetx.reaction/MNXR100611; KEGG Reaction: http://identifiers.org/kegg.re…
	r0517	2-methyl-4-amino-5-hydroxymethylpyrimidine-diphosphate:4-methyl-5-(2-phosphoethyl)-thiazole 2-methyl-4-aminopyridine-5-methenyltransferase	4-amino-2-methyl-5-diphosphomethylpyrimidine[c] + 4-methyl-5-(2-phosphonooxyethyl)thiazole[c] => diphosphate[c] + thiamin monophosphate[c]	2.5.1.3;2.5.1.3	CCM_01506	0	1000			kegg.reaction/R03223	Thiamine metabolism		Thiamine metabolism		2	TMPPP	EC Number: http://identifiers.org/ec-code/2.5.1.3; RHEA: http://identifiers.org/rhea/22328; RHEA: http://identifiers.org/rhea/22329; RHEA: http://identifiers.org/rhea/22330; RHEA: http://identifiers.org/rhea/22331; BioCyc: http://identifiers.org/biocyc/META:THI-P-SYN-RXN; MetaNetX (MNX) Equation: http://identifiers.org/metanetx.reaction/MNXR104908; KEGG Reaction: http://identifiers.org/kegg.react…
	r0518	thiamin diphosphate phosphohydrolase	h2o[c] + thiamin diphosphate[c] => phosphate[c] + thiamin monophosphate[c]	3.6.1.15	CCM_03944	0	1000				Thiamine metabolism		Thiamine metabolism		2	NTP4	EC Number: http://identifiers.org/ec-code/3.6.1; EC Number: http://identifiers.org/ec-code/3.6.1.15; BioCyc: http://identifiers.org/biocyc/META:RXN-14217; MetaNetX (MNX) Equation: http://identifiers.org/metanetx.reaction/MNXR102044; SEED Reaction: http://identifiers.org/seed.reaction/rxn09516
	r0519	thiamin monophosphate phosphohydrolase	h2o[c] + thiamin monophosphate[c] => phosphate[c] + thiamin[c]	3.1.3.-;3.1.3.1;3.1.3.100;3.1.3.2	CCM_01841 or CCM_03826 or CCM_07556 or CCM_07965 or CCM_09478 or CCM_09635	0	1000			kegg.reaction/R02135	Thiamine metabolism		Thiamine metabolism		2	PTHRpp	EC Number: http://identifiers.org/ec-code/3.1.3; RHEA: http://identifiers.org/rhea/30579; RHEA: http://identifiers.org/rhea/30580; RHEA: http://identifiers.org/rhea/30581; RHEA: http://identifiers.org/rhea/30582; BioCyc: http://identifiers.org/biocyc/META:RXN-14505; MetaNetX (MNX) Equation: http://identifiers.org/metanetx.reaction/MNXR103332; SEED Reaction: http://identifiers.org/seed.reaction/rx…
	r0520	ATP:thiamine diphosphotransferase	atp[c] + thiamin[c] => amp[c] + thiamin diphosphate[c]	2.7.6.2;2.7.6.2	CCM_00395 or CCM_02875 or CCM_00395 or CCM_02281 or CCM_02368 or CCM_02875	0	1000			kegg.reaction/R00619	Thiamine metabolism		Thiamine metabolism		2	TMDPK	EC Number: http://identifiers.org/ec-code/2.7.6.2; MetaNetX (MNX) Equation: http://identifiers.org/metanetx.reaction/MNXR138867; SEED Reaction: http://identifiers.org/seed.reaction/rxn00440
	r0521	GTP 7,8-8,9-dihydrolase (diphosphate-forming)	gtp[c] => 2,5-diamino-6-hydroxy-4-(5'-phosphoribosylamino)-pyrimidine[c] + diphosphate[c] + formate[c]	3.5.4.25	CCM_03947 or CCM_09652	0	1000			kegg.reaction/R00425	Riboflavin, FMN and FAD metabolism		Riboflavin, FMN and FAD metabolism		2	GTPDH	MetaNetX (MNX) Equation: http://identifiers.org/metanetx.reaction/MNXR100454
	r0525	D-ribulose 5-phosphate formate-lyase (L-3,4-dihydroxybutan-2-one-4-phosphate-forming)	d-ribulose 5-phosphate[c] => 2-hydroxy-3-oxobutyl phosphate[c] + formate[c]	4.1.99.12;4.1.99.12	CCM_04503	0	1000			kegg.reaction/R07281	Riboflavin, FMN and FAD metabolism		Riboflavin, FMN and FAD metabolism		2	DB4PS	EC Number: http://identifiers.org/ec-code/4.1.99.12; MetaNetX (MNX) Equation: http://identifiers.org/metanetx.reaction/MNXR97178; KEGG Reaction: http://identifiers.org/kegg.reaction/R07281; SEED Reaction: http://identifiers.org/seed.reaction/rxn05040
	r0526	6,7-dimethyl-8-ribityllumazine synthase	2-hydroxy-3-oxobutyl phosphate[c] + 5-amino-6-(d-ribitylamino)uracil[c] => 6,7-dimethyl-8-(1-d-ribityl)lumazine[c] + 2 h2o[c] + phosphate[c]	2.5.1.-;2.5.1.78	CCM_06814	0	1000			kegg.reaction/R04457	Riboflavin, FMN and FAD metabolism		Riboflavin, FMN and FAD metabolism		2	DMRLMS_h
	r0527	6,7-dimethyl-8-(1-D-ribityl)lumazine:6,7-dimethyl-8-(1-D-ribityl)lumazine 2,3-butanediyltransferase	2 6,7-dimethyl-8-(1-d-ribityl)lumazine[c] => 5-amino-6-(d-ribitylamino)uracil[c] + riboflavin[c]	2.5.1.9;2.5.1.9	CCM_06814 or CCM_06886	0	1000			kegg.reaction/R00066	Riboflavin, FMN and FAD metabolism		Riboflavin, FMN and FAD metabolism		2	RBFSb	EC Number: http://identifiers.org/ec-code/2.5.1.9; RHEA: http://identifiers.org/rhea/20772; RHEA: http://identifiers.org/rhea/20773; RHEA: http://identifiers.org/rhea/20774; RHEA: http://identifiers.org/rhea/20775; BioCyc: http://identifiers.org/biocyc/META:RIBOFLAVIN-SYN-RXN; MetaNetX (MNX) Equation: http://identifiers.org/metanetx.reaction/MNXR103430; KEGG Reaction: http://identifiers.org/kegg.…
	r0528	ATP:riboflavin 5'-phosphotransferase	atp[c] + riboflavin[c] => adp[c] + fmn[c]	2.7.1.26;2.7.1.26	CCM_09383	0	1000			kegg.reaction/R00549	Riboflavin, FMN and FAD metabolism		Riboflavin, FMN and FAD metabolism		2	RBFK	RHEA: http://identifiers.org/rhea/14357; RHEA: http://identifiers.org/rhea/14358; RHEA: http://identifiers.org/rhea/14359; RHEA: http://identifiers.org/rhea/14360; EC Number: http://identifiers.org/ec-code/2.7.1.26; BioCyc: http://identifiers.org/biocyc/META:RIBOFLAVINKIN-RXN; MetaNetX (MNX) Equation: http://identifiers.org/metanetx.reaction/MNXR103429; Reactome Reaction: http://identifiers.org/r…
	r0529	ATP:FMN adenylyltransferase	atp[c] + fmn[c] => diphosphate[c] + fad[c]	2.7.7.2;2.7.7.2	CCM_05212	0	1000			kegg.reaction/R00161	Riboflavin, FMN and FAD metabolism		Riboflavin, FMN and FAD metabolism		2	AFAT	RHEA: http://identifiers.org/rhea/17237; RHEA: http://identifiers.org/rhea/17238; RHEA: http://identifiers.org/rhea/17239; RHEA: http://identifiers.org/rhea/17240; EC Number: http://identifiers.org/ec-code/2.7.7.2; BioCyc: http://identifiers.org/biocyc/META:FADSYN-RXN; MetaNetX (MNX) Equation: http://identifiers.org/metanetx.reaction/MNXR95501; Reactome Reaction: http://identifiers.org/reactome/R…
	r0531	1D-myo-inositol-3-phosphate lyase (isomerizing)	alpha-d-glucose 6-phosphate[c] => 1d-myo-inositol 3-phosphate[c]	5.5.1.4	CCM_08408	0	1000			kegg.reaction/R07324	Inositol phosphate metabolism		Inositol phosphate metabolism		2	MI3PS	RHEA: http://identifiers.org/rhea/10716; RHEA: http://identifiers.org/rhea/10717; RHEA: http://identifiers.org/rhea/10718; RHEA: http://identifiers.org/rhea/10719; EC Number: http://identifiers.org/ec-code/5.5.1.4; BioCyc: http://identifiers.org/biocyc/META:MYO-INOSITOL-1-PHOSPHATE-SYNTHASE-RXN; MetaNetX (MNX) Equation: http://identifiers.org/metanetx.reaction/MNXR101575; Reactome Reaction: http:…
	r0532	1D-myo-inositol 3-phosphate phosphohydrolase	1d-myo-inositol 3-phosphate[c] + h2o[c] => myo-inositol[c] + phosphate[c]	3.1.3.25;3.1.3.25	CCM_02973 or CCM_03264 or CCM_04056 or CCM_02973 or CCM_03351 or CCM_07890	0	1000			kegg.reaction/R01187	Inositol phosphate metabolism		Inositol phosphate metabolism		2	MI3PP	EC Number: http://identifiers.org/ec-code/3.1.3.25; RHEA: http://identifiers.org/rhea/30739; RHEA: http://identifiers.org/rhea/30740; RHEA: http://identifiers.org/rhea/30741; RHEA: http://identifiers.org/rhea/30742; BioCyc: http://identifiers.org/biocyc/META:MYO-INOSITOL-1OR-4-MONOPHOSPHATASE-RXN; MetaNetX (MNX) Equation: http://identifiers.org/metanetx.reaction/MNXR101574; Reactome Reaction: htt…
	r0533	myo-Inositol:oxygen oxidoreductase	myo-inositol[c] + o2[c] => d-glucuronate[c] + h2o[c]	1.13.99.1	CCM_00628	0	1000			kegg.reaction/R01184	Inositol phosphate metabolism		Inositol phosphate metabolism		2	INOSTO	EC Number: http://identifiers.org/ec-code/1.13.99.1; RHEA: http://identifiers.org/rhea/23696; RHEA: http://identifiers.org/rhea/23697; RHEA: http://identifiers.org/rhea/23698; RHEA: http://identifiers.org/rhea/23699; BioCyc: http://identifiers.org/biocyc/META:MYO-INOSITOL-OXYGENASE-RXN; MetaNetX (MNX) Equation: http://identifiers.org/metanetx.reaction/MNXR100839; KEGG Reaction: http://identifiers…
	r0535	myo-inositol 2-dehydrogenase	myo-inositol[c] + nad(+)[c] => 2-inosose[c] + nadh[c]	1.1.1.18;1.1.1.18	CCM_03114	0	1000				Inositol phosphate metabolism		Inositol phosphate metabolism		2	INS2D	EC Number: http://identifiers.org/ec-code/1.1.1.18; RHEA: http://identifiers.org/rhea/16949; RHEA: http://identifiers.org/rhea/16950; RHEA: http://identifiers.org/rhea/16951; RHEA: http://identifiers.org/rhea/16952; BioCyc: http://identifiers.org/biocyc/META:MYO-INOSITOL-2-DEHYDROGENASE-RXN; MetaNetX (MNX) Equation: http://identifiers.org/metanetx.reaction/MNXR100842; KEGG Reaction: http://identi…
	r0536	1D-myo-inositol 1-phosphate phosphohydrolase	1d-myo-inositol 1-phosphate[c] + h2o[c] => myo-inositol[c] + phosphate[c]	3.1.3.25;3.1.3.25	CCM_02973 or CCM_03351 or CCM_07890	0	1000			kegg.reaction/R01185	Inositol phosphate metabolism		Inositol phosphate metabolism		2	MI1PP	RHEA: http://identifiers.org/rhea/27670; RHEA: http://identifiers.org/rhea/27671; RHEA: http://identifiers.org/rhea/27672; RHEA: http://identifiers.org/rhea/27673; EC Number: http://identifiers.org/ec-code/3.1.3.25; BioCyc: http://identifiers.org/biocyc/META:RXN0-5408; MetaNetX (MNX) Equation: http://identifiers.org/metanetx.reaction/MNXR101570; Reactome Reaction: http://identifiers.org/reactome/…
	r0537	phosphatidylinositol 4-kinase	1-phosphatidyl-1d-myo-inositols[c] + atp[c] => 1-phosphatidyl-1d-myo-inositol 4-phosphate[c] + adp[c]	2.7.1.67;2.7.1.67	CCM_02448 or CCM_06818 or CCM_07525	0	1000			kegg.reaction/R03361	Inositol phosphate metabolism		Inositol phosphate metabolism		2	PIK4	MetaNetX (MNX) Equation: http://identifiers.org/metanetx.reaction/MNXR102825
	r0538	ATP:1-phosphatidyl-1D-myo-inositol-4-phosphate 5-phosphotransferase	1-phosphatidyl-1d-myo-inositol 4-phosphate[c] + atp[c] => 1-phosphatidyl-d-myo-inositol 4,5-bisphosphate[c] + adp[c]	2.7.1.68;2.7.1.68	CCM_01361	0	1000			kegg.reaction/R03469	Inositol phosphate metabolism		Inositol phosphate metabolism		2	PI4P5K_cho	RHEA: http://identifiers.org/rhea/14425; RHEA: http://identifiers.org/rhea/14426; RHEA: http://identifiers.org/rhea/14427; RHEA: http://identifiers.org/rhea/14428; EC Number: http://identifiers.org/ec-code/2.7.1.68; BioCyc: http://identifiers.org/biocyc/META:2.7.1.68-RXN; MetaNetX (MNX) Equation: http://identifiers.org/metanetx.reaction/MNXR102789; KEGG Reaction: http://identifiers.org/kegg.react…
	r0539	ATP:1-phosphatidyl-1D-myo-inositol 3-phosphotransferase	1-phosphatidyl-1d-myo-inositols[c] + atp[c] => 1-phosphatidyl-1d-myo-inositol 3-phosphate[c] + adp[c]	2.7.1.137;2.7.1.137;2.7.1.154	CCM_03362	0	1000			kegg.reaction/R03362	Inositol phosphate metabolism		Inositol phosphate metabolism		2	PIK3_cho	RHEA: http://identifiers.org/rhea/12709; RHEA: http://identifiers.org/rhea/12710; RHEA: http://identifiers.org/rhea/12711; RHEA: http://identifiers.org/rhea/12712; EC Number: http://identifiers.org/ec-code/2.7.1.137; EC Number: http://identifiers.org/ec-code/2.7.1.154; MetaNetX (MNX) Equation: http://identifiers.org/metanetx.reaction/MNXR102824; Reactome Reaction: http://identifiers.org/reactome/…
	r0540	L-aspartate:2-oxoglutarate aminotransferase	2-oxoglutarate[m] + l-aspartate[m] <=> l-glutamate[m] + oxaloacetate[m]	2.6.1.1	CCM_05388 or CCM_07489	-1000	1000			kegg.reaction/R00355	Alanine/aspartate and asparagine metabolism		Alanine/aspartate and asparagine metabolism		2	ASPTA	EC Number: http://identifiers.org/ec-code/2.6.1.1; RHEA: http://identifiers.org/rhea/21824; RHEA: http://identifiers.org/rhea/21825; RHEA: http://identifiers.org/rhea/21826; RHEA: http://identifiers.org/rhea/21827; BioCyc: http://identifiers.org/biocyc/META:ASPAMINOTRANS-RXN; BioCyc: http://identifiers.org/biocyc/META:RXN-13697; MetaNetX (MNX) Equation: http://identifiers.org/metanetx.reaction/MN…
	r0541	L-aspartate:2-oxoglutarate aminotransferase	2-oxoglutarate[c] + l-aspartate[c] <=> l-glutamate[c] + oxaloacetate[c]	2.6.1.1	CCM_01874	-1000	1000			kegg.reaction/R00355	Alanine/aspartate and asparagine metabolism		Alanine/aspartate and asparagine metabolism		2	ASPTA	EC Number: http://identifiers.org/ec-code/2.6.1.1; RHEA: http://identifiers.org/rhea/21824; RHEA: http://identifiers.org/rhea/21825; RHEA: http://identifiers.org/rhea/21826; RHEA: http://identifiers.org/rhea/21827; BioCyc: http://identifiers.org/biocyc/META:ASPAMINOTRANS-RXN; BioCyc: http://identifiers.org/biocyc/META:RXN-13697; MetaNetX (MNX) Equation: http://identifiers.org/metanetx.reaction/MN…
	r0542	L-alanine:2-oxoglutarate aminotransferase	2-oxoglutarate[c] + l-alanine[c] <=> l-glutamate[c] + pyruvate[c]	2.6.1.2	CCM_04522	-1000	1000			kegg.reaction/R00258	Alanine/aspartate and asparagine metabolism		Alanine/aspartate and asparagine metabolism		2	ALATA_L	RHEA: http://identifiers.org/rhea/19453; RHEA: http://identifiers.org/rhea/19454; RHEA: http://identifiers.org/rhea/19455; RHEA: http://identifiers.org/rhea/19456; EC Number: http://identifiers.org/ec-code/2.6.1.2; BioCyc: http://identifiers.org/biocyc/META:ALANINE-AMINOTRANSFERASE-RXN; BioCyc: http://identifiers.org/biocyc/META:RXN-13698; MetaNetX (MNX) Equation: http://identifiers.org/metanetx.…
	r0543	L-asparagine amidohydrolase	h2o[c] + l-asparagine[c] => l-aspartate[c] + nh3[c]	3.5.1.1;3.5.1.1;3.5.1.38;3.5.5.4	CCM_02482 or CCM_02918	0	1000			kegg.reaction/R00485	Alanine/aspartate and asparagine metabolism		Alanine/aspartate and asparagine metabolism		2	ASNN	RHEA: http://identifiers.org/rhea/21016; RHEA: http://identifiers.org/rhea/21017; RHEA: http://identifiers.org/rhea/21018; RHEA: http://identifiers.org/rhea/21019; EC Number: http://identifiers.org/ec-code/3.5.1.1; EC Number: http://identifiers.org/ec-code/3.5.1.38; EC Number: http://identifiers.org/ec-code/3.5.5.4; BioCyc: http://identifiers.org/biocyc/META:ASPARAGHYD-RXN; MetaNetX (MNX) Equatio…
	r0544	L-aspartate:L-glutamine amido-ligase (AMP-forming)	atp[c] + h2o[c] + l-aspartate[c] + l-glutamine[c] => amp[c] + diphosphate[c] + l-asparagine[c] + l-glutamate[c]	6.3.5.4;6.3.5.4	CCM_00509 or CCM_01521	0	1000			kegg.reaction/R00578	Alanine/aspartate and asparagine metabolism		Alanine/aspartate and asparagine metabolism		2	ASNS1	RHEA: http://identifiers.org/rhea/12228; RHEA: http://identifiers.org/rhea/12229; RHEA: http://identifiers.org/rhea/12230; RHEA: http://identifiers.org/rhea/12231; EC Number: http://identifiers.org/ec-code/6.3.5.4; BioCyc: http://identifiers.org/biocyc/META:ASNSYNB-RXN; MetaNetX (MNX) Equation: http://identifiers.org/metanetx.reaction/MNXR96059; Reactome Reaction: http://identifiers.org/reactome/…
	r0545	L-aspartate:ammonia ligase (AMP-forming)	atp[c] + l-aspartate[c] + nh3[c] => amp[c] + diphosphate[c] + l-asparagine[c]	6.3.1.1	CCM_03855	0	1000			kegg.reaction/R00483	Alanine/aspartate and asparagine metabolism		Alanine/aspartate and asparagine metabolism		2	ASNS2	RHEA: http://identifiers.org/rhea/11372; RHEA: http://identifiers.org/rhea/11373; RHEA: http://identifiers.org/rhea/11374; RHEA: http://identifiers.org/rhea/11375; EC Number: http://identifiers.org/ec-code/6.3.1.1; EC Number: http://identifiers.org/ec-code/6.3.5.4; BioCyc: http://identifiers.org/biocyc/META:ASNSYNA-RXN; MetaNetX (MNX) Equation: http://identifiers.org/metanetx.reaction/MNXR96060; …
	r0546	L-aspartate-4-semialdehyde:NADP+ oxidoreductase (phosphorylating)	4-phospho-l-aspartate[c] + nadph[c] => l-aspartate 4-semialdehyde[c] + nadp(+)[c] + phosphate[c]	1.2.1.11	CCM_03310	0	1000			kegg.reaction/R02291	Alanine/aspartate and asparagine metabolism		Alanine/aspartate and asparagine metabolism		2	ASAD	EC Number: http://identifiers.org/ec-code/1.2.1.11; RHEA: http://identifiers.org/rhea/24284; RHEA: http://identifiers.org/rhea/24285; RHEA: http://identifiers.org/rhea/24286; RHEA: http://identifiers.org/rhea/24287; BioCyc: http://identifiers.org/biocyc/META:ASPARTATE-SEMIALDEHYDE-DEHYDROGENASE-RXN; MetaNetX (MNX) Equation: http://identifiers.org/metanetx.reaction/MNXR96039; KEGG Reaction: http:/…
	r0547	ATP:L-aspartate 4-phosphotransferase	atp[c] + l-aspartate[c] => 4-phospho-l-aspartate[c] + adp[c]	2.7.2.4;2.7.2.4	CCM_03898 or CCM_09199	0	1000			kegg.reaction/R00480	Alanine/aspartate and asparagine metabolism		Alanine/aspartate and asparagine metabolism		2	ASPK_1	EC Number: http://identifiers.org/ec-code/2.7.2.4; RHEA: http://identifiers.org/rhea/23776; RHEA: http://identifiers.org/rhea/23777; RHEA: http://identifiers.org/rhea/23778; RHEA: http://identifiers.org/rhea/23779; BioCyc: http://identifiers.org/biocyc/META:ASPARTATEKIN-RXN; MetaNetX (MNX) Equation: http://identifiers.org/metanetx.reaction/MNXR96085; KEGG Reaction: http://identifiers.org/kegg.rea…
	r0548	L-aspartic acid:oxygen oxidoreductase (deaminating)	h2o[c] + l-aspartate[c] + o2[c] => h2o2[c] + nh3[c] + oxaloacetate[c]	1.4.3.2	CCM_00373	0	1000			kegg.reaction/R00357	Alanine/aspartate and asparagine metabolism		Alanine/aspartate and asparagine metabolism		2	ASPO1	EC Number: http://identifiers.org/ec-code/1.4.3.16; EC Number: http://identifiers.org/ec-code/1.4.3.2; RHEA: http://identifiers.org/rhea/19025; RHEA: http://identifiers.org/rhea/19026; RHEA: http://identifiers.org/rhea/19027; RHEA: http://identifiers.org/rhea/19028; MetaNetX (MNX) Equation: http://identifiers.org/metanetx.reaction/MNXR96088; KEGG Reaction: http://identifiers.org/kegg.reaction/R00…
	r0549	L-glutamate 1-carboxy-lyase (4-aminobutanoate-forming)	l-glutamate[c] => co2[c] + gamma-aminobutyrate[c]	4.1.1.15;4.1.1.15	CCM_06124 or CCM_08740 or CCM_08965	0	1000			kegg.reaction/R00261	Alanine/aspartate and asparagine metabolism		Alanine/aspartate and asparagine metabolism		2	GLUDC	RHEA: http://identifiers.org/rhea/17785; RHEA: http://identifiers.org/rhea/17786; RHEA: http://identifiers.org/rhea/17787; RHEA: http://identifiers.org/rhea/17788; EC Number: http://identifiers.org/ec-code/4.1.1.15; BioCyc: http://identifiers.org/biocyc/META:GLUTDECARBOX-RXN; MetaNetX (MNX) Equation: http://identifiers.org/metanetx.reaction/MNXR95942; KEGG Reaction: http://identifiers.org/kegg.re…
	r0550	L-glutamate:NADP+ oxidoreductase (transaminating)	2-oxoglutarate[c] + l-glutamine[c] + nadph[c] => 2 l-glutamate[c] + nadp(+)[c]	1.4.1.13	CCM_03495	0	1000			kegg.reaction/R00114	Alanine/aspartate and asparagine metabolism		Alanine/aspartate and asparagine metabolism		2	GLUSy	EC Number: http://identifiers.org/ec-code/1.4.1.13; RHEA: http://identifiers.org/rhea/15501; RHEA: http://identifiers.org/rhea/15502; RHEA: http://identifiers.org/rhea/15503; RHEA: http://identifiers.org/rhea/15504; BioCyc: http://identifiers.org/biocyc/META:GLUTAMATESYN-RXN; MetaNetX (MNX) Equation: http://identifiers.org/metanetx.reaction/MNXR100291; KEGG Reaction: http://identifiers.org/kegg.r…
	r0551	L-glutamate:NAD+ oxidoreductase (deaminating)	h2o[c] + l-glutamate[c] + nad(+)[c] => 2-oxoglutarate[c] + nadh[c] + nh3[c]	1.4.1.2;1.4.1.2;1.4.1.3	CCM_09444	0	1000			kegg.reaction/R00243	Alanine/aspartate and asparagine metabolism		Alanine/aspartate and asparagine metabolism		2	GLUDxi	EC Number: http://identifiers.org/ec-code/1.4.1.2; EC Number: http://identifiers.org/ec-code/1.4.1.3; EC Number: http://identifiers.org/ec-code/1.4.1.4; RHEA: http://identifiers.org/rhea/15133; RHEA: http://identifiers.org/rhea/15134; RHEA: http://identifiers.org/rhea/15135; RHEA: http://identifiers.org/rhea/15136; BioCyc: http://identifiers.org/biocyc/META:GLUTAMATE-DEHYDROGENASE-RXN; MetaNetX (…
	r0552	L-glutamate:NAD+ oxidoreductase (deaminating)	h2o[m] + l-glutamate[m] + nad(+)[m] => 2-oxoglutarate[m] + nadh[m] + nh3[m]	1.4.1.2	CCM_09444	0	1000			kegg.reaction/R00243	Alanine/aspartate and asparagine metabolism		Alanine/aspartate and asparagine metabolism		2	GLUDxi	EC Number: http://identifiers.org/ec-code/1.4.1.2; EC Number: http://identifiers.org/ec-code/1.4.1.3; EC Number: http://identifiers.org/ec-code/1.4.1.4; RHEA: http://identifiers.org/rhea/15133; RHEA: http://identifiers.org/rhea/15134; RHEA: http://identifiers.org/rhea/15135; RHEA: http://identifiers.org/rhea/15136; BioCyc: http://identifiers.org/biocyc/META:GLUTAMATE-DEHYDROGENASE-RXN; MetaNetX (…
	r0554	4-aminobutanoate:2-oxoglutarate aminotransferase	2-oxoglutarate[m] + gamma-aminobutyrate[m] => l-glutamate[m] + succinate semialdehyde[m]	2.6.1.19	CCM_03453 or CCM_06829 or CCM_07295	0	1000			kegg.reaction/R01648	Alanine/aspartate and asparagine metabolism		Alanine/aspartate and asparagine metabolism		2	ABTA	EC Number: http://identifiers.org/ec-code/2.6.1.19; RHEA: http://identifiers.org/rhea/23352; RHEA: http://identifiers.org/rhea/23353; RHEA: http://identifiers.org/rhea/23354; RHEA: http://identifiers.org/rhea/23355; BioCyc: http://identifiers.org/biocyc/META:GABATRANSAM-RXN; MetaNetX (MNX) Equation: http://identifiers.org/metanetx.reaction/MNXR95186; KEGG Reaction: http://identifiers.org/kegg.rea…
	r0555	L-glutamate:ammonia ligase (ADP-forming)	atp[c] + l-glutamate[c] + nh3[c] => adp[c] + l-glutamine[c] + phosphate[c]	6.3.1.2;6.3.1.2	CCM_05697 or CCM_08119	0	1000			kegg.reaction/R00253	Alanine/aspartate and asparagine metabolism		Alanine/aspartate and asparagine metabolism		2	GLNS	RHEA: http://identifiers.org/rhea/16169; RHEA: http://identifiers.org/rhea/16170; RHEA: http://identifiers.org/rhea/16171; RHEA: http://identifiers.org/rhea/16172; EC Number: http://identifiers.org/ec-code/6.3.1.2; BioCyc: http://identifiers.org/biocyc/META:GLUTAMINESYN-RXN; MetaNetX (MNX) Equation: http://identifiers.org/metanetx.reaction/MNXR100024; Reactome Reaction: http://identifiers.org/rea…
	r0557	glucosamine-fructose-6-phosphate aminotransferase	beta-d-fructofuranose 6-phosphate[c] + l-glutamine[c] => d-glucosamine 6-phosphate[c] + l-glutamate[c]	2.6.1.16	CCM_07033	0	1000			kegg.reaction/R00768	Alanine/aspartate and asparagine metabolism		Alanine/aspartate and asparagine metabolism		2	GF6PTA	EC Number: http://identifiers.org/ec-code/2.6.1.16; BioCyc: http://identifiers.org/biocyc/META:L-GLN-FRUCT-6-P-AMINOTRANS-RXN; MetaNetX (MNX) Equation: http://identifiers.org/metanetx.reaction/MNXR100107
	r0558	L-alanine:glyoxylate aminotransferase	glycine[p] + pyruvate[p] <=> glyoxylate[p] + l-alanine[p]	2.6.1.44	CCM_00200	-1000	1000			kegg.reaction/R00369	Alanine/aspartate and asparagine metabolism		Alanine/aspartate and asparagine metabolism		2	AGTi	EC Number: http://identifiers.org/ec-code/2.6.1.44; RHEA: http://identifiers.org/rhea/24248; RHEA: http://identifiers.org/rhea/24249; RHEA: http://identifiers.org/rhea/24250; RHEA: http://identifiers.org/rhea/24251; BioCyc: http://identifiers.org/biocyc/META:ALANINE--GLYOXYLATE-AMINOTRANSFERASE-RXN; MetaNetX (MNX) Equation: http://identifiers.org/metanetx.reaction/MNXR95618; Reactome Reaction: ht…
	r0559	L-serine:pyruvate aminotransferase	l-serine[c] + pyruvate[c] => 3-hydroxypyruvate[c] + l-alanine[c]	2.6.1.44;2.6.1.51	CCM_00200	0	1000			kegg.reaction/R00585	Alanine/aspartate and asparagine metabolism		Alanine/aspartate and asparagine metabolism		2	SPTix	EC Number: http://identifiers.org/ec-code/2.6.1.51; RHEA: http://identifiers.org/rhea/22852; RHEA: http://identifiers.org/rhea/22853; RHEA: http://identifiers.org/rhea/22854; RHEA: http://identifiers.org/rhea/22855; BioCyc: http://identifiers.org/biocyc/META:SERINE--PYRUVATE-AMINOTRANSFERASE-RXN; MetaNetX (MNX) Equation: http://identifiers.org/metanetx.reaction/MNXR104504; KEGG Reaction: http://i…
	r0560	N-acetyl-gamma-glutamyl-phosphate reductase (EC 1.2.1.38) and acetylglutamate kinase (EC 2.7.2.8)	n-acetyl-l-gamma-glutamyl phosphate[m] + nadph[m] => n-acetyl-l-glutamate 5-semialdehyde[m] + nadp(+)[m] + phosphate[m]	1.2.1.38	CCM_06281 or CCM_09169	0	1000				Arginine and proline metabolism		Arginine and proline metabolism		2	AGPRim	EC Number: http://identifiers.org/ec-code/1.2.1.38; RHEA: http://identifiers.org/rhea/21588; RHEA: http://identifiers.org/rhea/21589; RHEA: http://identifiers.org/rhea/21590; RHEA: http://identifiers.org/rhea/21591; BioCyc: http://identifiers.org/biocyc/META:N-ACETYLGLUTPREDUCT-RXN; MetaNetX (MNX) Equation: http://identifiers.org/metanetx.reaction/MNXR95530; KEGG Reaction: http://identifiers.org/…
	r0561	S-adenosylmethioninamine:putrescine 3-aminopropyltransferase	putrescine[c] + s-adenosylmethioninamine[c] => 5'-s-methyl-5'-thioadenosine[c] + spermidine[c]	2.5.1.16;2.5.1.16	CCM_00554 or CCM_04045	0	1000			kegg.reaction/R01920	Arginine and proline metabolism		Arginine and proline metabolism		2	SPMS	RHEA: http://identifiers.org/rhea/12721; RHEA: http://identifiers.org/rhea/12722; RHEA: http://identifiers.org/rhea/12723; RHEA: http://identifiers.org/rhea/12724; EC Number: http://identifiers.org/ec-code/2.5.1.16; BioCyc: http://identifiers.org/biocyc/META:SPERMIDINESYN-RXN; MetaNetX (MNX) Equation: http://identifiers.org/metanetx.reaction/MNXR95860; KEGG Reaction: http://identifiers.org/kegg.r…
	r0562	urea:carbon-dioxide ligase (ADP-forming)	atp[c] + co2[c] + h2o[c] + urea[c] => adp[c] + phosphate[c] + urea-1-carboxylate[c]	6.3.4.6	CCM_03431	0	1000			kegg.reaction/R00774	Arginine and proline metabolism		Arginine and proline metabolism		2	UREASE	RHEA: http://identifiers.org/rhea/20896; RHEA: http://identifiers.org/rhea/20897; RHEA: http://identifiers.org/rhea/20898; RHEA: http://identifiers.org/rhea/20899; EC Number: http://identifiers.org/ec-code/6.3.4.6; MetaNetX (MNX) Equation: http://identifiers.org/metanetx.reaction/MNXR105149; KEGG Reaction: http://identifiers.org/kegg.reaction/R00774; SEED Reaction: http://identifiers.org/seed.rea…
	r0563	urea-1-carboxylate amidohydrolase	h2o[c] + urea-1-carboxylate[c] => 2 co2[c] + 2 nh3[c]	3.5.1.54	CCM_01972	0	1000			kegg.reaction/R00005	Arginine and proline metabolism		Arginine and proline metabolism		2	ALPHNH	RHEA: http://identifiers.org/rhea/19029; RHEA: http://identifiers.org/rhea/19030; RHEA: http://identifiers.org/rhea/19031; RHEA: http://identifiers.org/rhea/19032; EC Number: http://identifiers.org/ec-code/3.5.1.54; BioCyc: http://identifiers.org/biocyc/META:ALLOPHANATE-HYDROLASE-RXN; MetaNetX (MNX) Equation: http://identifiers.org/metanetx.reaction/MNXR95786; KEGG Reaction: http://identifiers.or…
	r0564	S-adenosyl-L-methionine carboxy-lyase [(5-deoxy-5-adenosyl)(3-aminopropyl)methylsulfonium-forming]	s-adenosyl-l-methionine[c] => co2[c] + s-adenosylmethioninamine[c]	4.1.1.50;4.1.1.50	CCM_04914	0	1000			kegg.reaction/R00178	Arginine and proline metabolism		Arginine and proline metabolism		2	ADMDC	RHEA: http://identifiers.org/rhea/15981; RHEA: http://identifiers.org/rhea/15982; RHEA: http://identifiers.org/rhea/15983; RHEA: http://identifiers.org/rhea/15984; EC Number: http://identifiers.org/ec-code/4.1.1.50; BioCyc: http://identifiers.org/biocyc/META:SAMDECARB-RXN; MetaNetX (MNX) Equation: http://identifiers.org/metanetx.reaction/MNXR95455; KEGG Reaction: http://identifiers.org/kegg.react…
	r0565	spermidine:(acceptor) oxidoreductase	h2o[c] + o2[c] + spermidine[c] => 4-aminobutanal[c] + h2o2[c] + trimethylenediamine[c]	1.5.99.6	CCM_04765	0	1000			kegg.reaction/R01914	Arginine and proline metabolism		Arginine and proline metabolism		2	SPMDOX	MetaNetX (MNX) Equation: http://identifiers.org/metanetx.reaction/MNXR104481
	r0566	acetyl-CoA:L-glutamate N-acetyltransferase	acetyl-coa[m] + l-glutamate[m] => coenzyme a[m] + n-acetyl-l-glutamate[m]	2.3.1.1	CCM_03230	0	1000			kegg.reaction/R00259	Arginine and proline metabolism		Arginine and proline metabolism		2	ACGS	EC Number: http://identifiers.org/ec-code/2.3.1.1; RHEA: http://identifiers.org/rhea/24292; RHEA: http://identifiers.org/rhea/24293; RHEA: http://identifiers.org/rhea/24294; RHEA: http://identifiers.org/rhea/24295; BioCyc: http://identifiers.org/biocyc/META:N-ACETYLTRANSFER-RXN; MetaNetX (MNX) Equation: http://identifiers.org/metanetx.reaction/MNXR95259; Reactome Reaction: http://identifiers.org/…
	r0567	ATP:N-acetyl-L-glutamate 5-phosphotransferase	atp[m] + n-acetyl-l-glutamate[m] => adp[m] + n-acetyl-l-gamma-glutamyl phosphate[m]	2.7.2.8	CCM_01946 or CCM_02941 or CCM_06281	0	1000			kegg.reaction/R02649	Arginine and proline metabolism		Arginine and proline metabolism		2	ACGK	RHEA: http://identifiers.org/rhea/14629; RHEA: http://identifiers.org/rhea/14630; RHEA: http://identifiers.org/rhea/14631; RHEA: http://identifiers.org/rhea/14632; EC Number: http://identifiers.org/ec-code/2.7.2.8; BioCyc: http://identifiers.org/biocyc/META:ACETYLGLUTKIN-RXN; MetaNetX (MNX) Equation: http://identifiers.org/metanetx.reaction/MNXR95256; KEGG Reaction: http://identifiers.org/kegg.re…
	r0568	N2-acetyl-L-ornithine:2-oxoglutarate aminotransferase	l-glutamate[m] + n-acetyl-l-glutamate 5-semialdehyde[m] => 2-oxoglutarate[m] + n2-acetyl-l-ornithine[m]	2.6.1.11	CCM_08964	0	1000			kegg.reaction/R02283	Arginine and proline metabolism		Arginine and proline metabolism		2	ACOTA	RHEA: http://identifiers.org/rhea/18049; RHEA: http://identifiers.org/rhea/18050; RHEA: http://identifiers.org/rhea/18051; RHEA: http://identifiers.org/rhea/18052; EC Number: http://identifiers.org/ec-code/2.6.1.11; BioCyc: http://identifiers.org/biocyc/META:ACETYLORNTRANSAM-RXN; MetaNetX (MNX) Equation: http://identifiers.org/metanetx.reaction/MNXR95388; KEGG Reaction: http://identifiers.org/keg…
	r0569	N2-acetyl-L-ornithine amidohydrolase	h2o[c] + n2-acetyl-l-ornithine[c] => acetate[c] + l-ornithine[c]	3.5.1.14;3.5.1.16;3.5.1.14;3.5.1.16	CCM_00841 or CCM_02857 or CCM_03627 or CCM_05862 or CCM_06895	0	1000			kegg.reaction/R00669	Arginine and proline metabolism		Arginine and proline metabolism		2	ACODA	RHEA: http://identifiers.org/rhea/15941; RHEA: http://identifiers.org/rhea/15942; RHEA: http://identifiers.org/rhea/15943; RHEA: http://identifiers.org/rhea/15944; EC Number: http://identifiers.org/ec-code/3.5.1.14; EC Number: http://identifiers.org/ec-code/3.5.1.16; BioCyc: http://identifiers.org/biocyc/META:ACETYLORNDEACET-RXN; MetaNetX (MNX) Equation: http://identifiers.org/metanetx.reaction/M…
	r0570	L-citrulline:L-aspartate ligase (AMP-forming)	amp[c] + diphosphate[c] + n-(l-arginino)succinate[c] <=> atp[c] + l-aspartate[c] + l-citrulline[c]	6.3.4.5	CCM_02400	-1000	1000			kegg.reaction/R01954	Arginine and proline metabolism		Arginine and proline metabolism		2	ARGSS	RHEA: http://identifiers.org/rhea/10932; RHEA: http://identifiers.org/rhea/10933; RHEA: http://identifiers.org/rhea/10934; RHEA: http://identifiers.org/rhea/10935; EC Number: http://identifiers.org/ec-code/6.3.4.5; BioCyc: http://identifiers.org/biocyc/META:ARGSUCCINSYN-RXN; MetaNetX (MNX) Equation: http://identifiers.org/metanetx.reaction/MNXR138060; Reactome Reaction: http://identifiers.org/rea…
	r0571	2-(Nomega-L-arginino)succinate arginine-lyase (fumarate-forming)	fumarate[c] + l-arginine[c] <=> n-(l-arginino)succinate[c]	4.3.2.1	CCM_02430 or CCM_08039	-1000	1000			kegg.reaction/R01086	Arginine and proline metabolism		Arginine and proline metabolism		2	ARGSL	RHEA: http://identifiers.org/rhea/24020; RHEA: http://identifiers.org/rhea/24021; RHEA: http://identifiers.org/rhea/24022; RHEA: http://identifiers.org/rhea/24023; EC Number: http://identifiers.org/ec-code/4.3.2.1; BioCyc: http://identifiers.org/biocyc/META:ARGSUCCINLYA-RXN; MetaNetX (MNX) Equation: http://identifiers.org/metanetx.reaction/MNXR138059; Reactome Reaction: http://identifiers.org/rea…
	r0572	L-arginine amidinohydrolase	h2o[c] + l-arginine[c] => l-ornithine[c] + urea[c]	3.5.3.1;3.5.3.1	CCM_00464	0	1000			kegg.reaction/R00551	Arginine and proline metabolism		Arginine and proline metabolism		2	ARGN	RHEA: http://identifiers.org/rhea/20569; RHEA: http://identifiers.org/rhea/20570; RHEA: http://identifiers.org/rhea/20571; RHEA: http://identifiers.org/rhea/20572; EC Number: http://identifiers.org/ec-code/3.5.3.1; BioCyc: http://identifiers.org/biocyc/META:ARGINASE-RXN; MetaNetX (MNX) Equation: http://identifiers.org/metanetx.reaction/MNXR95945; Reactome Reaction: http://identifiers.org/reactome…
	r0573	agmatine amidinohydrolase	agmatine[c] + h2o[c] => putrescine[c] + urea[c]	3.5.3.11;3.5.3.11	(CCM_06009 and CCM_00978)	0	1000			kegg.reaction/R01157	Arginine and proline metabolism		Arginine and proline metabolism		2	AGMT	RHEA: http://identifiers.org/rhea/13929; RHEA: http://identifiers.org/rhea/13930; RHEA: http://identifiers.org/rhea/13931; RHEA: http://identifiers.org/rhea/13932; EC Number: http://identifiers.org/ec-code/3.5.3.11; BioCyc: http://identifiers.org/biocyc/META:AGMATIN-RXN; MetaNetX (MNX) Equation: http://identifiers.org/metanetx.reaction/MNXR95554; Reactome Reaction: http://identifiers.org/reactome…
	r0574	gamma-glutamyl phosphate reductase	d-alpha-glutamyl phosphate[c] + nadph[c] => l-glutamate 5-semialdehyde[c] + nadp(+)[c] + phosphate[c]	1.2.1.41	CCM_01989	0	1000				Arginine and proline metabolism		Arginine and proline metabolism		2	G5SD	EC Number: http://identifiers.org/ec-code/1.2.1.41; RHEA: http://identifiers.org/rhea/19541; RHEA: http://identifiers.org/rhea/19542; RHEA: http://identifiers.org/rhea/19543; RHEA: http://identifiers.org/rhea/19544; BioCyc: http://identifiers.org/biocyc/META:GLUTSEMIALDEHYDROG-RXN; MetaNetX (MNX) Equation: http://identifiers.org/metanetx.reaction/MNXR99896; KEGG Reaction: http://identifiers.org/k…
	r0575	proline dehydrogenase	fad[m] + l-proline[m] => (s)-1-pyrroline-5-carboxylate[m] + fadh2[m]	1.5.99.8	CCM_02842	0	1000				Arginine and proline metabolism		Arginine and proline metabolism		2	PROD2	EC Number: http://identifiers.org/ec-code/1.5.-.-; EC Number: http://identifiers.org/ec-code/1.5.99.8; RHEA: http://identifiers.org/rhea/26124; RHEA: http://identifiers.org/rhea/26125; RHEA: http://identifiers.org/rhea/26126; RHEA: http://identifiers.org/rhea/26127; MetaNetX (MNX) Equation: http://identifiers.org/metanetx.reaction/MNXR103187; KEGG Reaction: http://identifiers.org/kegg.reaction/R1…
	r0576	L-proline,2-oxoglutarate:oxygen oxidoreductase (4-hydroxylating)	2-oxoglutarate[c] + l-proline[c] + o2[c] => co2[c] + succinate[c] + trans-4-hydroxy-l-proline[c]	1.14.11.2	CCM_02519 or CCM_06081 or CCM_06083 or CCM_07872 or CCM_03263	0	1000			kegg.reaction/R01252	Arginine and proline metabolism		Arginine and proline metabolism		2	PROAKGOX1r	EC Number: http://identifiers.org/ec-code/1.14.11; EC Number: http://identifiers.org/ec-code/1.14.11.2; RHEA: http://identifiers.org/rhea/51508; RHEA: http://identifiers.org/rhea/51509; RHEA: http://identifiers.org/rhea/51510; RHEA: http://identifiers.org/rhea/51511; BioCyc: http://identifiers.org/biocyc/META:RXN490-3641; MetaNetX (MNX) Equation: http://identifiers.org/metanetx.reaction/MNXR10318…
	r0577	delta-1-pyrroline-5-carboxylate dehydrogenase	nad(+)[m] + trans-4-hydroxy-l-proline[m] => l-1-pyrroline-3-hydroxy-5-carboxylate[m] + nadh[m]	1.5.1.12	CCM_06901	0	1000				Arginine and proline metabolism		Arginine and proline metabolism		2	P5CD	EC Number: http://identifiers.org/ec-code/1.2.1.88; EC Number: http://identifiers.org/ec-code/1.5.1.12; RHEA: http://identifiers.org/rhea/16417; RHEA: http://identifiers.org/rhea/16418; RHEA: http://identifiers.org/rhea/16419; RHEA: http://identifiers.org/rhea/16420; BioCyc: http://identifiers.org/biocyc/META:PYRROLINECARBDEHYDROG-RXN; MetaNetX (MNX) Equation: http://identifiers.org/metanetx.reac…
	r0578	delta-1-pyrroline-5-carboxylate dehydrogenase	h2o[m] + l-glutamate 5-semialdehyde[m] + nadp(+)[m] => l-glutamate[m] + nadph[m]	1.5.1.12	CCM_06901	0	1000				Arginine and proline metabolism		Arginine and proline metabolism		2	P5CD	EC Number: http://identifiers.org/ec-code/1.2.1.88; EC Number: http://identifiers.org/ec-code/1.5.1.12; RHEA: http://identifiers.org/rhea/16417; RHEA: http://identifiers.org/rhea/16418; RHEA: http://identifiers.org/rhea/16419; RHEA: http://identifiers.org/rhea/16420; BioCyc: http://identifiers.org/biocyc/META:PYRROLINECARBDEHYDROG-RXN; MetaNetX (MNX) Equation: http://identifiers.org/metanetx.reac…
	r0579	L-proline:NADP+ 5-oxidoreductase	(s)-1-pyrroline-5-carboxylate[c] + nadph[c] => l-proline[c] + nadp(+)[c]	1.5.1.2	CCM_01522	0	1000			kegg.reaction/R01251	Arginine and proline metabolism		Arginine and proline metabolism		2	P5CR	EC Number: http://identifiers.org/ec-code/1.5.1.2; RHEA: http://identifiers.org/rhea/14109; RHEA: http://identifiers.org/rhea/14110; RHEA: http://identifiers.org/rhea/14111; RHEA: http://identifiers.org/rhea/14112; MetaNetX (MNX) Equation: http://identifiers.org/metanetx.reaction/MNXR102302; Reactome Reaction: http://identifiers.org/reactome/R-ATH-6783955; Reactome Reaction: http://identifiers.or…
	r0580	pyrroline-5-carboxylate reductase	l-1-pyrroline-3-hydroxy-5-carboxylate[c] + nadph[c] => nadp(+)[c] + trans-4-hydroxy-l-proline[c]	1.5.1.2	CCM_01522	0	1000				Arginine and proline metabolism		Arginine and proline metabolism		2	P5CR	EC Number: http://identifiers.org/ec-code/1.5.1.2; RHEA: http://identifiers.org/rhea/14109; RHEA: http://identifiers.org/rhea/14110; RHEA: http://identifiers.org/rhea/14111; RHEA: http://identifiers.org/rhea/14112; MetaNetX (MNX) Equation: http://identifiers.org/metanetx.reaction/MNXR102302; Reactome Reaction: http://identifiers.org/reactome/R-ATH-6783955; Reactome Reaction: http://identifiers.or…
	r0581	trans-4-hydroxy-L-proline:NAD+ 5-oxidoreductase	l-1-pyrroline-3-hydroxy-5-carboxylate[c] + nadh[c] => nad(+)[c] + trans-4-hydroxy-l-proline[c]	1.5.1.2	CCM_01522	0	1000			kegg.reaction/R03291	Arginine and proline metabolism		Arginine and proline metabolism		2	HPROa	EC Number: http://identifiers.org/ec-code/1.5.1.12; EC Number: http://identifiers.org/ec-code/1.5.1.2; MetaNetX (MNX) Equation: http://identifiers.org/metanetx.reaction/MNXR100698; KEGG Reaction: http://identifiers.org/kegg.reaction/R03291; SEED Reaction: http://identifiers.org/seed.reaction/rxn02356
	r0583	N2-acetyl-L-ornithine:L-glutamate N-acetyltransferase	l-glutamate[m] + n2-acetyl-l-ornithine[m] => l-ornithine[m] + n-acetyl-l-glutamate[m]	2.3.1.35	CCM_03230	0	1000			kegg.reaction/R02282	Arginine and proline metabolism		Arginine and proline metabolism		2	ORNTAC	RHEA: http://identifiers.org/rhea/15349; RHEA: http://identifiers.org/rhea/15350; RHEA: http://identifiers.org/rhea/15351; RHEA: http://identifiers.org/rhea/15352; EC Number: http://identifiers.org/ec-code/2.3.1.35; BioCyc: http://identifiers.org/biocyc/META:GLUTAMATE-N-ACETYLTRANSFERASE-RXN; MetaNetX (MNX) Equation: http://identifiers.org/metanetx.reaction/MNXR102221; KEGG Reaction: http://ident…
	r0584	L-ornithine:2-oxo-acid aminotransferase	2-oxoglutarate[c] + l-ornithine[c] => l-glutamate 5-semialdehyde[c] + l-glutamate[c]	2.6.1.13;2.6.1.13	CCM_07280	0	1000			kegg.reaction/R00667	Arginine and proline metabolism		Arginine and proline metabolism		2	ORNTArm	EC Number: http://identifiers.org/ec-code/2.6.1.13; RHEA: http://identifiers.org/rhea/25160; RHEA: http://identifiers.org/rhea/25161; RHEA: http://identifiers.org/rhea/25162; RHEA: http://identifiers.org/rhea/25163; BioCyc: http://identifiers.org/biocyc/META:ORNITHINE-GLU-AMINOTRANSFERASE-RXN; MetaNetX (MNX) Equation: http://identifiers.org/metanetx.reaction/MNXR102220; Reactome Reaction: http://…
	r0585	L-ornithine carboxy-lyase (putrescine-forming)	l-ornithine[c] => co2[c] + putrescine[c]	4.1.1.17;4.1.1.17	CCM_07906	0	1000			kegg.reaction/R00670	Arginine and proline metabolism		Arginine and proline metabolism		2	HMR_4422
	r0586	S-adenosylmethioninamine:spermidine 3-aminopropyltransferase	s-adenosylmethioninamine[c] + spermidine[c] => 5'-s-methyl-5'-thioadenosine[c] + spermine[c]	2.5.1.22;2.5.1.16;2.5.1.22	CCM_00554 or CCM_04045	0	1000			kegg.reaction/R02869	Arginine and proline metabolism		Arginine and proline metabolism		2	ASAPT	RHEA: http://identifiers.org/rhea/19973; RHEA: http://identifiers.org/rhea/19974; RHEA: http://identifiers.org/rhea/19975; RHEA: http://identifiers.org/rhea/19976; EC Number: http://identifiers.org/ec-code/2.5.1.16; EC Number: http://identifiers.org/ec-code/2.5.1.22; BioCyc: http://identifiers.org/biocyc/META:SPERMINE-SYNTHASE-RXN; MetaNetX (MNX) Equation: http://identifiers.org/metanetx.reaction…
	r0590	sulfhydryl oxidase (Sox)	2 l-cysteine[c] + o2[c] => h2o2[c] + l-cystine[c]	1.8.3.3	CCM_08835	0	1000				Cysteine and methionine metabolism		Cysteine and methionine metabolism		2
	r0591	S-adenosyl-L-methionine:L-homocysteine S-methyltransferase	l-homocysteine[c] + s-adenosyl-l-methionine[c] => l-methionine[c] + s-adenosyl-l-homocysteine[c]	2.1.1.10;2.1.1.10	CCM_05252	0	1000			kegg.reaction/R00650	Cysteine and methionine metabolism		Cysteine and methionine metabolism		2	HCYSMT	EC Number: http://identifiers.org/ec-code/2.1.1; EC Number: http://identifiers.org/ec-code/2.1.1.10; RHEA: http://identifiers.org/rhea/21820; RHEA: http://identifiers.org/rhea/21821; RHEA: http://identifiers.org/rhea/21822; RHEA: http://identifiers.org/rhea/21823; BioCyc: http://identifiers.org/biocyc/META:HOMOCYSTEINE-S-METHYLTRANSFERASE-RXN; MetaNetX (MNX) Equation: http://identifiers.org/metan…
	r0592	ATP:L-methionine S-adenosyltransferase	atp[c] + h2o[c] + l-methionine[c] => diphosphate[c] + phosphate[c] + s-adenosyl-l-methionine[c]	2.5.1.6	(CCM_03206 and CCM_02308)	0	1000			kegg.reaction/R00177	Cysteine and methionine metabolism		Cysteine and methionine metabolism		2	METAT	EC Number: http://identifiers.org/ec-code/2.5.1.6; RHEA: http://identifiers.org/rhea/21080; RHEA: http://identifiers.org/rhea/21081; RHEA: http://identifiers.org/rhea/21082; RHEA: http://identifiers.org/rhea/21083; BioCyc: http://identifiers.org/biocyc/META:S-ADENMETSYN-RXN; MetaNetX (MNX) Equation: http://identifiers.org/metanetx.reaction/MNXR101407; Reactome Reaction: http://identifiers.org/rea…
	r0593	acetyl-CoA:L-serine O-acetyltransferase	acetyl-coa[c] + l-serine[c] => coenzyme a[c] + o-acetyl-l-serine[c]	2.3.1.30	CCM_01130 or CCM_09306	0	1000			kegg.reaction/R00586	Cysteine and methionine metabolism		Cysteine and methionine metabolism		2	SERAT	EC Number: http://identifiers.org/ec-code/2.3.1.30; RHEA: http://identifiers.org/rhea/24560; RHEA: http://identifiers.org/rhea/24561; RHEA: http://identifiers.org/rhea/24562; RHEA: http://identifiers.org/rhea/24563; BioCyc: http://identifiers.org/biocyc/META:SERINE-O-ACETTRAN-RXN; MetaNetX (MNX) Equation: http://identifiers.org/metanetx.reaction/MNXR104275; Reactome Reaction: http://identifiers.o…
	r0594	O3-acetyl-L-serine:hydrogen-sulfide	h2s[m] + o-acetyl-l-serine[m] => acetate[m] + l-cysteine[m]	2.5.1.47	CCM_01476 or CCM_05473 or CCM_08097	0	1000			kegg.reaction/R00897	Cysteine and methionine metabolism		Cysteine and methionine metabolism		2	CYSS_2	RHEA: http://identifiers.org/rhea/14829; RHEA: http://identifiers.org/rhea/14830; RHEA: http://identifiers.org/rhea/14831; RHEA: http://identifiers.org/rhea/14832; EC Number: http://identifiers.org/ec-code/2.5.1.47; EC Number: http://identifiers.org/ec-code/2.5.1.65; BioCyc: http://identifiers.org/biocyc/META:ACSERLY-RXN; MetaNetX (MNX) Equation: http://identifiers.org/metanetx.reaction/MNXR97007…
	r0595	O3-acetyl-L-serine:hydrogen-sulfide	h2s[c] + o-acetyl-l-serine[c] => acetate[c] + l-cysteine[c]	2.5.1.47;2.5.1.47;2.5.1.65	CCM_00844 or CCM_01476 or CCM_03055 or CCM_05473 or CCM_08891	0	1000			kegg.reaction/R00897	Cysteine and methionine metabolism		Cysteine and methionine metabolism		2	CYSS_2	RHEA: http://identifiers.org/rhea/14829; RHEA: http://identifiers.org/rhea/14830; RHEA: http://identifiers.org/rhea/14831; RHEA: http://identifiers.org/rhea/14832; EC Number: http://identifiers.org/ec-code/2.5.1.47; EC Number: http://identifiers.org/ec-code/2.5.1.65; BioCyc: http://identifiers.org/biocyc/META:ACSERLY-RXN; MetaNetX (MNX) Equation: http://identifiers.org/metanetx.reaction/MNXR97007…
	r0596	L-cystathionine L-homocysteine-lyase (deaminating; pyruvate-forming)	h2o[c] + l-cystathionine[c] => l-homocysteine[c] + nh3[c] + pyruvate[c]	4.4.1.8;4.4.1.8	CCM_02946 or CCM_05953	0	1000			kegg.reaction/R01286	Cysteine and methionine metabolism		Cysteine and methionine metabolism		2	CYSTL	RHEA: http://identifiers.org/rhea/13965; RHEA: http://identifiers.org/rhea/13966; RHEA: http://identifiers.org/rhea/13967; RHEA: http://identifiers.org/rhea/13968; EC Number: http://identifiers.org/ec-code/4.4.1.8; MetaNetX (MNX) Equation: http://identifiers.org/metanetx.reaction/MNXR96469; KEGG Reaction: http://identifiers.org/kegg.reaction/R01286
	r0597	5-methyltetrahydropteroyltri-L-glutamate:L-homocysteine S-methyltransferase	5-methyltetrahydropteroyltri-l-glutamate[c] + l-homocysteine[c] => l-methionine[c] + tetrahydropteroyltri-l-glutamate[c]	2.1.1.14;2.1.1.14	CCM_05322 or CCM_08535	0	1000			kegg.reaction/R04405	Cysteine and methionine metabolism		Cysteine and methionine metabolism		2	MHPGLUT	EC Number: http://identifiers.org/ec-code/2.1.1.14; RHEA: http://identifiers.org/rhea/21196; RHEA: http://identifiers.org/rhea/21197; RHEA: http://identifiers.org/rhea/21198; RHEA: http://identifiers.org/rhea/21199; BioCyc: http://identifiers.org/biocyc/META:HOMOCYSMET-RXN; MetaNetX (MNX) Equation: http://identifiers.org/metanetx.reaction/MNXR101555; KEGG Reaction: http://identifiers.org/kegg.rea…
	r0598	5-methyltetrahydrofolate:L-homocysteine S-methyltransferase	5-methyltetrahydrofolate[c] + l-homocysteine[c] => l-methionine[c] + tetrahydrofolate[c]	2.1.1.13	CCM_05322	0	1000			kegg.reaction/R00946	Cysteine and methionine metabolism		Cysteine and methionine metabolism		2	METSm	RHEA: http://identifiers.org/rhea/11172; RHEA: http://identifiers.org/rhea/11173; RHEA: http://identifiers.org/rhea/11174; RHEA: http://identifiers.org/rhea/11175; EC Number: http://identifiers.org/ec-code/2.1.1.13; MetaNetX (MNX) Equation: http://identifiers.org/metanetx.reaction/MNXR101481; KEGG Reaction: http://identifiers.org/kegg.reaction/R00946
	r0599	S-adenosyl-L-homocysteine hydrolase	h2o[c] + s-adenosyl-l-homocysteine[c] => adenosine[c] + l-homocysteine[c]	3.3.1.1;3.3.1.1	CCM_07244	0	1000			kegg.reaction/R00192	Cysteine and methionine metabolism		Cysteine and methionine metabolism		2	AHCi	RHEA: http://identifiers.org/rhea/21708; RHEA: http://identifiers.org/rhea/21709; RHEA: http://identifiers.org/rhea/21710; RHEA: http://identifiers.org/rhea/21711; EC Number: http://identifiers.org/ec-code/3.3.1.1; BioCyc: http://identifiers.org/biocyc/META:ADENOSYLHOMOCYSTEINASE-RXN; MetaNetX (MNX) Equation: http://identifiers.org/metanetx.reaction/MNXR95492; Reactome Reaction: http://identifier…
	r0600	acetyl-CoA:L-homoserine O-acetyltransferase	acetyl-coa[c] + l-homoserine[c] <=> coenzyme a[c] + o-acetyl-l-homoserine[c]	2.3.1.31	CCM_01130 or CCM_06127 or CCM_09306	-1000	1000			kegg.reaction/R01776	Cysteine and methionine metabolism		Cysteine and methionine metabolism		2	HSERTA	RHEA: http://identifiers.org/rhea/13701; RHEA: http://identifiers.org/rhea/13702; RHEA: http://identifiers.org/rhea/13703; RHEA: http://identifiers.org/rhea/13704; EC Number: http://identifiers.org/ec-code/2.3.1.31; BioCyc: http://identifiers.org/biocyc/META:HOMOSERINE-O-ACETYLTRANSFERASE-RXN; MetaNetX (MNX) Equation: http://identifiers.org/metanetx.reaction/MNXR100736; KEGG Reaction: http://iden…
	r0601	O-acetyl-L-homoserine:hydrogen sulfide S-(3-amino-3-carboxypropyl)transferase	h2s[c] + o-acetyl-l-homoserine[c] => acetate[c] + l-homocysteine[c]	2.5.1.49	CCM_03055 or CCM_08891	0	1000			kegg.reaction/R01287	Cysteine and methionine metabolism		Cysteine and methionine metabolism		2	AHHST	EC Number: http://identifiers.org/ec-code/2.5.1.49; RHEA: http://identifiers.org/rhea/27822; RHEA: http://identifiers.org/rhea/27823; RHEA: http://identifiers.org/rhea/27824; RHEA: http://identifiers.org/rhea/27825; BioCyc: http://identifiers.org/biocyc/META:ACETYLHOMOSER-CYS-RXN; MetaNetX (MNX) Equation: http://identifiers.org/metanetx.reaction/MNXR95631; KEGG Reaction: http://identifiers.org/ke…
	r0602	O-succinyl-L-homoserine succinate-lyase (adding cysteine)	l-cysteine[c] + o-succinyl-l-homoserine[c] => l-cystathionine[c] + succinate[c]	2.5.1.48;2.5.1.48	CCM_01210 or CCM_08893	0	1000			kegg.reaction/R03260	Cysteine and methionine metabolism		Cysteine and methionine metabolism		2	SHSL1h	EC Number: http://identifiers.org/ec-code/2.5.1.48; RHEA: http://identifiers.org/rhea/20397; RHEA: http://identifiers.org/rhea/20398; RHEA: http://identifiers.org/rhea/20399; RHEA: http://identifiers.org/rhea/20400; BioCyc: http://identifiers.org/biocyc/META:O-SUCCHOMOSERLYASE-RXN; MetaNetX (MNX) Equation: http://identifiers.org/metanetx.reaction/MNXR104380; KEGG Reaction: http://identifiers.org/…
	r0603	O-succinyl-L-homoserine succinate-lyase (deaminating; 2-oxobutanoate-forming)	h2o[c] + o-succinyl-l-homoserine[c] => 2-oxobutanoate[c] + nh3[c] + succinate[c]	2.5.1.48;2.5.1.48	CCM_01210 or CCM_08893	0	1000			kegg.reaction/R00999	Cysteine and methionine metabolism		Cysteine and methionine metabolism		2	SHSL4r	EC Number: http://identifiers.org/ec-code/2.5.1.48; EC Number: http://identifiers.org/ec-code/4.2.99.9; EC Number: http://identifiers.org/ec-code/4.3.1; BioCyc: http://identifiers.org/biocyc/META:METBALT-RXN; MetaNetX (MNX) Equation: http://identifiers.org/metanetx.reaction/MNXR104384; KEGG Reaction: http://identifiers.org/kegg.reaction/R00999; SEED Reaction: http://identifiers.org/seed.reaction/…
	r0604	O-succinyl-L-homoserine succinate-lyase (adding hydrogen sulfide)	h2s[c] + o-succinyl-l-homoserine[c] => l-homocysteine[c] + succinate[c]	2.5.1.48;2.5.1.-;2.5.1.48	CCM_01210 or CCM_08893	0	1000			kegg.reaction/R01288	Cysteine and methionine metabolism		Cysteine and methionine metabolism		2	SHSL2h	EC Number: http://identifiers.org/ec-code/2.5.1.-; EC Number: http://identifiers.org/ec-code/2.5.1.48; RHEA: http://identifiers.org/rhea/27826; RHEA: http://identifiers.org/rhea/27827; RHEA: http://identifiers.org/rhea/27828; RHEA: http://identifiers.org/rhea/27829; BioCyc: http://identifiers.org/biocyc/META:RXN-9384; MetaNetX (MNX) Equation: http://identifiers.org/metanetx.reaction/MNXR104382; K…
	r0605	O-acetyl-L-homoserine succinate-lyase (adding cysteine)	l-cysteine[c] + o-acetyl-l-homoserine[c] => acetate[c] + l-cystathionine[c]	2.5.1.48;2.5.1.48	CCM_01210 or CCM_08893	0	1000			kegg.reaction/R03217	Cysteine and methionine metabolism		Cysteine and methionine metabolism		2	METB1	EC Number: http://identifiers.org/ec-code/2.5.1.48; RHEA: http://identifiers.org/rhea/30931; RHEA: http://identifiers.org/rhea/30932; RHEA: http://identifiers.org/rhea/30933; RHEA: http://identifiers.org/rhea/30934; MetaNetX (MNX) Equation: http://identifiers.org/metanetx.reaction/MNXR95637; KEGG Reaction: http://identifiers.org/kegg.reaction/R03217
	r0606	L-cystathionine cysteine-lyase (deaminating; 2-oxobutanoate-forming)	h2o[c] + l-cystathionine[c] => 2-oxobutanoate[c] + l-cysteine[c] + nh3[c]	4.4.1.1;4.4.1.1	CCM_05953 or CCM_07010	0	1000			kegg.reaction/R01001	Cysteine and methionine metabolism		Cysteine and methionine metabolism		2	CYSTGL	RHEA: http://identifiers.org/rhea/14005; RHEA: http://identifiers.org/rhea/14006; RHEA: http://identifiers.org/rhea/14007; RHEA: http://identifiers.org/rhea/14008; EC Number: http://identifiers.org/ec-code/4.4.1.1; BioCyc: http://identifiers.org/biocyc/META:RXN-15130; MetaNetX (MNX) Equation: http://identifiers.org/metanetx.reaction/MNXR97012; Reactome Reaction: http://identifiers.org/reactome/R-…
	r0607	S-methyl-5'-thioadenosine:phosphate-S-methyl-5-thio-alpha-D-ribosyl-transferase	5'-s-methyl-5'-thioadenosine[c] + phosphate[c] <=> adenine[c] + s-methyl-5-thio-d-ribose 1-phosphate[c]	2.4.2.28	CCM_04505	-1000	1000			kegg.reaction/R01402	Cysteine and methionine metabolism		Cysteine and methionine metabolism		2	MTAP	RHEA: http://identifiers.org/rhea/11852; RHEA: http://identifiers.org/rhea/11853; RHEA: http://identifiers.org/rhea/11854; RHEA: http://identifiers.org/rhea/11855; EC Number: http://identifiers.org/ec-code/2.4.2.28; BioCyc: http://identifiers.org/biocyc/META:5-METHYLTHIOADENOSINE-PHOSPHORYLASE-RXN; MetaNetX (MNX) Equation: http://identifiers.org/metanetx.reaction/MNXR101745; Reactome Reaction: ht…
	r0608	S-methyl-5-thio-D-ribulose-1-phosphate hydro-lyase	s-methyl-5-thio-d-ribose 1-phosphate[c] => 5-(methylsulfanyl)-2,3-dioxopentyl phosphate[c] + h2o[c]	4.2.1.109	CCM_06287	0	1000			kegg.reaction/R07392	Cysteine and methionine metabolism		Cysteine and methionine metabolism		2	MDRPD	RHEA: http://identifiers.org/rhea/15549; RHEA: http://identifiers.org/rhea/15550; RHEA: http://identifiers.org/rhea/15551; RHEA: http://identifiers.org/rhea/15552; EC Number: http://identifiers.org/ec-code/4.2.1.109; BioCyc: http://identifiers.org/biocyc/META:R145-RXN; MetaNetX (MNX) Equation: http://identifiers.org/metanetx.reaction/MNXR125830; Reactome Reaction: http://identifiers.org/reactome/…
	r0610	1,2-dihydroxy-5-(methylthio)pent-1-en-3-one:oxygen oxidoreductase (formate-forming)	1,2-dihydroxy-5-(methylthio)pent-1-en-3-one[c] + o2[c] => 4-methylthio-2-oxobutanoate[c] + formate[c]	1.13.11.54	CCM_05825	0	1000			kegg.reaction/R07364	Cysteine and methionine metabolism		Cysteine and methionine metabolism		2	ARD_1	EC Number: http://identifiers.org/ec-code/1.13.11.54; RHEA: http://identifiers.org/rhea/24504; RHEA: http://identifiers.org/rhea/24505; RHEA: http://identifiers.org/rhea/24506; RHEA: http://identifiers.org/rhea/24507; BioCyc: http://identifiers.org/biocyc/META:R147-RXN; MetaNetX (MNX) Equation: http://identifiers.org/metanetx.reaction/MNXR95227; Reactome Reaction: http://identifiers.org/reactome/…
	r0611	aromatic-amino-acid transaminase	4-methylthio-2-oxobutanoate[c] + l-glutamate[c] => 2-oxoglutarate[c] + l-methionine[c]	2.6.1.57	CCM_05868 or CCM_06988 or CCM_01874	0	1000			kegg.reaction/R07396	Cysteine and methionine metabolism		Cysteine and methionine metabolism		2	ARAT	EC Number: http://identifiers.org/ec-code/2.6.1.5; EC Number: http://identifiers.org/ec-code/2.6.1.57; RHEA: http://identifiers.org/rhea/25796; RHEA: http://identifiers.org/rhea/25797; RHEA: http://identifiers.org/rhea/25798; RHEA: http://identifiers.org/rhea/25799; BioCyc: http://identifiers.org/biocyc/META:RXN-14147; MetaNetX (MNX) Equation: http://identifiers.org/metanetx.reaction/MNXR95923; K…
	r0612	aldehyde dehydrogenase (NAD+)	h2o[c] + nad(+)[c] + propanal[c] <=> nadh[c] + propionate[c]	1.2.1.3	CCM_05126 or CCM_08195 or CCM_08475 or CCM_00452 or CCM_02203 or CCM_05450 or CCM_07151 or CCM_09155	-1000	1000				Cysteine and methionine metabolism		Cysteine and methionine metabolism		2	RE3012C	MetaNetX (MNX) Equation: http://identifiers.org/metanetx.reaction/MNXR103766
	r0613	sulfhydryl oxidase	4 l-cysteine[c] + o2[c] => 2 h2o[c] + 2 l-cystine[c]	1.8.3.2	CCM_01232 or CCM_08754 or CCM_01232 or CCM_08754	0	1000				Cysteine and methionine metabolism		Cysteine and methionine metabolism		2
	r0614	L-cysteine:oxygen oxidoreductase	l-cysteine[c] + o2[c] => 3-sulfino-l-alanine[c]	1.13.11.20	CCM_04268	0	1000			kegg.reaction/R00893	Cysteine and methionine metabolism		Cysteine and methionine metabolism		2	CYSO	EC Number: http://identifiers.org/ec-code/1.13.11.20; RHEA: http://identifiers.org/rhea/20441; RHEA: http://identifiers.org/rhea/20442; RHEA: http://identifiers.org/rhea/20443; RHEA: http://identifiers.org/rhea/20444; BioCyc: http://identifiers.org/biocyc/META:CYSTEINE-DIOXYGENASE-RXN; MetaNetX (MNX) Equation: http://identifiers.org/metanetx.reaction/MNXR96993; Reactome Reaction: http://identifie…
	r0617	L-serine ammonia-lyase	l-serine[c] => nh3[c] + pyruvate[c]	4.3.1.17;4.3.1.17;4.3.1.19	CCM_00163 or CCM_01396 or CCM_01983 or CCM_04445	0	1000			kegg.reaction/R00220	Glycine, serine and threonine metabolism		Glycine, serine and threonine metabolism		2	SER_AL	RHEA: http://identifiers.org/rhea/19169; RHEA: http://identifiers.org/rhea/19170; RHEA: http://identifiers.org/rhea/19171; RHEA: http://identifiers.org/rhea/19172; EC Number: http://identifiers.org/ec-code/4.3.1.15; EC Number: http://identifiers.org/ec-code/4.3.1.17; EC Number: http://identifiers.org/ec-code/4.3.1.19; BioCyc: http://identifiers.org/biocyc/META:4.3.1.17-RXN; MetaNetX (MNX) Equatio…
	r0618	3-phospho-D-glycerate:NAD+ 2-oxidoreductase	3-phospho-d-glycerate[c] + nad(+)[c] => 3-phosphonooxypyruvate[c] + nadh[c]	1.1.1.95;1.1.1.95	CCM_00186 or CCM_03938 or CCM_05096 or CCM_07592	0	1000			kegg.reaction/R01513	Glycine, serine and threonine metabolism		Glycine, serine and threonine metabolism		2	PGCD	EC Number: http://identifiers.org/ec-code/1.1.1.95; RHEA: http://identifiers.org/rhea/12641; RHEA: http://identifiers.org/rhea/12642; RHEA: http://identifiers.org/rhea/12643; RHEA: http://identifiers.org/rhea/12644; BioCyc: http://identifiers.org/biocyc/META:PGLYCDEHYDROG-RXN; MetaNetX (MNX) Equation: http://identifiers.org/metanetx.reaction/MNXR102527; Reactome Reaction: http://identifiers.org/r…
	r0619	3-phosphoserine:2-oxoglutarate aminotransferase	3-phosphonooxypyruvate[c] + l-glutamate[c] => 2-oxoglutarate[c] + o-phospho-l-serine[c]	2.6.1.52	CCM_07814	0	1000			kegg.reaction/R04173	Glycine, serine and threonine metabolism		Glycine, serine and threonine metabolism		2	PSERT	RHEA: http://identifiers.org/rhea/14329; RHEA: http://identifiers.org/rhea/14330; RHEA: http://identifiers.org/rhea/14331; RHEA: http://identifiers.org/rhea/14332; EC Number: http://identifiers.org/ec-code/2.6.1.52; BioCyc: http://identifiers.org/biocyc/META:PSERTRANSAM-RXN; MetaNetX (MNX) Equation: http://identifiers.org/metanetx.reaction/MNXR103225; Reactome Reaction: http://identifiers.org/rea…
	r0620	O-phospho-L-serine phosphohydrolase	h2o[c] + o-phospho-l-serine[c] => l-serine[c] + phosphate[c]	3.1.3.3;3.1.3.3	CCM_00003 or CCM_00954	0	1000			kegg.reaction/R00582	Glycine, serine and threonine metabolism		Glycine, serine and threonine metabolism		2	PSP_1
	r0621	L-homoserine:NADP+ oxidoreductase	l-aspartate 4-semialdehyde[c] + nadph[c] => l-homoserine[c] + nadp(+)[c]	1.1.1.3	CCM_00332	0	1000			kegg.reaction/R01775	Glycine, serine and threonine metabolism		Glycine, serine and threonine metabolism		2	HSDy	EC Number: http://identifiers.org/ec-code/1.1.1.3; RHEA: http://identifiers.org/rhea/15761; RHEA: http://identifiers.org/rhea/15762; RHEA: http://identifiers.org/rhea/15763; RHEA: http://identifiers.org/rhea/15764; MetaNetX (MNX) Equation: http://identifiers.org/metanetx.reaction/MNXR100734; KEGG Reaction: http://identifiers.org/kegg.reaction/R01775; SEED Reaction: http://identifiers.org/seed.rea…
	r0622	L-homoserine:NAD+ oxidoreductase	l-aspartate 4-semialdehyde[c] + nadh[c] => l-homoserine[c] + nad(+)[c]	1.1.1.3	CCM_00332	0	1000			kegg.reaction/R01773	Glycine, serine and threonine metabolism		Glycine, serine and threonine metabolism		2	HSDxi	EC Number: http://identifiers.org/ec-code/1.1.1.3; RHEA: http://identifiers.org/rhea/15757; RHEA: http://identifiers.org/rhea/15758; RHEA: http://identifiers.org/rhea/15759; RHEA: http://identifiers.org/rhea/15760; MetaNetX (MNX) Equation: http://identifiers.org/metanetx.reaction/MNXR100735; KEGG Reaction: http://identifiers.org/kegg.reaction/R01773; SEED Reaction: http://identifiers.org/seed.rea…
	r0623	ATP:L-homoserine O-phosphotransferase	atp[c] + l-homoserine[c] => adp[c] + o-phospho-l-homoserine[c]	2.7.1.39;2.7.1.39	CCM_09223	0	1000			kegg.reaction/R01771	Glycine, serine and threonine metabolism		Glycine, serine and threonine metabolism		2	HSK	RHEA: http://identifiers.org/rhea/13985; RHEA: http://identifiers.org/rhea/13986; RHEA: http://identifiers.org/rhea/13987; RHEA: http://identifiers.org/rhea/13988; EC Number: http://identifiers.org/ec-code/2.7.1.39; BioCyc: http://identifiers.org/biocyc/META:HOMOSERKIN-RXN; MetaNetX (MNX) Equation: http://identifiers.org/metanetx.reaction/MNXR100737; KEGG Reaction: http://identifiers.org/kegg.rea…
	r0624	O-phospho-L-homoserine phosphate-lyase (adding water;L-threonine-forming)	h2o[c] + o-phospho-l-homoserine[c] => l-threonine[c] + phosphate[c]	4.2.3.1;4.2.3.1	CCM_08537	0	1000			kegg.reaction/R01466	Glycine, serine and threonine metabolism		Glycine, serine and threonine metabolism		2	THRS_1	RHEA: http://identifiers.org/rhea/10840; RHEA: http://identifiers.org/rhea/10841; RHEA: http://identifiers.org/rhea/10842; RHEA: http://identifiers.org/rhea/10843; EC Number: http://identifiers.org/ec-code/4.2.3.1; BioCyc: http://identifiers.org/biocyc/META:THRESYN-RXN; MetaNetX (MNX) Equation: http://identifiers.org/metanetx.reaction/MNXR104846; KEGG Reaction: http://identifiers.org/kegg.reactio…
	r0625	L-threonine acetaldehyde-lyase (glycine-forming)	acetaldehyde[c] + glycine[c] <=> l-threonine[c]	4.1.2.5	CCM_08747	-1000	1000			kegg.reaction/R00751	Glycine, serine and threonine metabolism		Glycine, serine and threonine metabolism		2	THRA	RHEA: http://identifiers.org/rhea/19625; RHEA: http://identifiers.org/rhea/19626; RHEA: http://identifiers.org/rhea/19627; RHEA: http://identifiers.org/rhea/19628; EC Number: http://identifiers.org/ec-code/4.1.2.48; EC Number: http://identifiers.org/ec-code/4.1.2.5; BioCyc: http://identifiers.org/biocyc/META:THREONINE-ALDOLASE-RXN; MetaNetX (MNX) Equation: http://identifiers.org/metanetx.reaction…
	r0627	aminoacetone:oxygen oxidoreductase(deaminating)	aminoacetone[c] + h2o[c] + o2[c] => h2o2[c] + methylglyoxal[c] + nh3[c]	1.4.3.21;1.4.3.4;1.4.3.6	CCM_02614 or CCM_05218 or CCM_06912 or CCM_08193	0	1000			kegg.reaction/R02529	Glycine, serine and threonine metabolism		Glycine, serine and threonine metabolism		2	AMO	EC Number: http://identifiers.org/ec-code/1.4.3.21; EC Number: http://identifiers.org/ec-code/1.4.3.4; EC Number: http://identifiers.org/ec-code/1.4.3.6; RHEA: http://identifiers.org/rhea/28186; RHEA: http://identifiers.org/rhea/28187; RHEA: http://identifiers.org/rhea/28188; RHEA: http://identifiers.org/rhea/28189; BioCyc: http://identifiers.org/biocyc/META:AMACETOXID-RXN; MetaNetX (MNX) Equatio…
	r0628	choline dehydrogenase	choline[c] + fad[m] => betaine aldehyde[c] + fadh2[m]	1.1.99.1	CCM_05124 or CCM_06408 or CCM_01940 or CCM_07163 or CCM_09084	0	1000				Glycine, serine and threonine metabolism		Glycine, serine and threonine metabolism		2	CHOLD	EC Number: http://identifiers.org/ec-code/1.1.1; EC Number: http://identifiers.org/ec-code/1.1.1.1; RHEA: http://identifiers.org/rhea/33051; RHEA: http://identifiers.org/rhea/33052; RHEA: http://identifiers.org/rhea/33053; RHEA: http://identifiers.org/rhea/33054; BioCyc: http://identifiers.org/biocyc/META:RXN-6021; MetaNetX (MNX) Equation: http://identifiers.org/metanetx.reaction/MNXR96697; KEGG …
	r0629	p-cumic alcohol:NAD+ oxidoreductase	betaine aldehyde[c] + nad(+)[c] => glycine betaine[c] + nadh[c]	1.2.1.8	CCM_01703 or CCM_03300 or CCM_01703 or CCM_05384 or CCM_07713	0	1000			kegg.reaction/R02565	Glycine, serine and threonine metabolism		Glycine, serine and threonine metabolism		2	BETALDHx	EC Number: http://identifiers.org/ec-code/1.2.1.8; RHEA: http://identifiers.org/rhea/15305; RHEA: http://identifiers.org/rhea/15306; RHEA: http://identifiers.org/rhea/15307; RHEA: http://identifiers.org/rhea/15308; BioCyc: http://identifiers.org/biocyc/META:BADH-RXN; MetaNetX (MNX) Equation: http://identifiers.org/metanetx.reaction/MNXR96237; Reactome Reaction: http://identifiers.org/reactome/R-A…
	r0630	N,N-dimethylglycine oxidase	fad[m] + h2o[m] + n,n-dimethylglycine[m] => fadh2[m] + formaldehyde[m] + sarcosine[m]	1.5.99.2	CCM_08027	0	1000				Glycine, serine and threonine metabolism		Glycine, serine and threonine metabolism		2
	r0631	sarcosine:oxygen oxidoreductase (demethylating)	h2o[c] + o2[c] + sarcosine[c] => formaldehyde[c] + glycine[c] + h2o2[c]	1.5.3.1	CCM_01890 or CCM_04511 or CCM_04603 or CCM_04974 or CCM_05950 or CCM_08026 or CCM_09198	0	1000			kegg.reaction/R00610	Glycine, serine and threonine metabolism		Glycine, serine and threonine metabolism		2	SARCOXp	EC Number: http://identifiers.org/ec-code/1.5.3.1; RHEA: http://identifiers.org/rhea/13313; RHEA: http://identifiers.org/rhea/13314; RHEA: http://identifiers.org/rhea/13315; RHEA: http://identifiers.org/rhea/13316; BioCyc: http://identifiers.org/biocyc/META:SARCOX-RXN; MetaNetX (MNX) Equation: http://identifiers.org/metanetx.reaction/MNXR104272; KEGG Reaction: http://identifiers.org/kegg.reaction…
	r0632	L-serine hydro-lyase (adding homocysteine; L-cystathionine-forming)	l-homocysteine[c] + l-serine[c] => h2o[c] + l-cystathionine[c]	4.2.1.22;4.2.1.22	CCM_08097	0	1000			kegg.reaction/R01290	Glycine, serine and threonine metabolism		Glycine, serine and threonine metabolism		2	CYSTS	RHEA: http://identifiers.org/rhea/10112; RHEA: http://identifiers.org/rhea/10113; RHEA: http://identifiers.org/rhea/10114; RHEA: http://identifiers.org/rhea/10115; EC Number: http://identifiers.org/ec-code/4.2.1.22; BioCyc: http://identifiers.org/biocyc/META:CYSTATHIONINE-BETA-SYNTHASE-RXN; MetaNetX (MNX) Equation: http://identifiers.org/metanetx.reaction/MNXR97019; Reactome Reaction: http://iden…
	r0633	L-threonine ammonia-lyase (2-oxobutanoate-forming)	l-threonine[m] => 2-oxobutanoate[m] + nh3[m]	4.3.1.19	CCM_00163 or CCM_01983 or CCM_02857	0	1000			kegg.reaction/R00996	Glycine, serine and threonine metabolism		Glycine, serine and threonine metabolism		2	THRD_L	RHEA: http://identifiers.org/rhea/22108; RHEA: http://identifiers.org/rhea/22109; RHEA: http://identifiers.org/rhea/22110; RHEA: http://identifiers.org/rhea/22111; EC Number: http://identifiers.org/ec-code/4.3.1.19; BioCyc: http://identifiers.org/biocyc/META:THREDEHYD-RXN; MetaNetX (MNX) Equation: http://identifiers.org/metanetx.reaction/MNXR104714; KEGG Reaction: http://identifiers.org/kegg.reac…
	r0634	glycine:lipoylprotein oxidoreductase (decarboxylating and acceptor-aminomethylating)	glycine[m] + lipoyllysine-[h-protein][m] => co2[m] + s-aminomethyldihydrolipoyllysine-[h-protein][m]	1.4.4.2	CCM_04861	0	1000			kegg.reaction/R03425	Glycine, serine and threonine metabolism		Glycine, serine and threonine metabolism		2	GCCa	EC Number: http://identifiers.org/ec-code/1.4.4.2; MetaNetX (MNX) Equation: http://identifiers.org/metanetx.reaction/MNXR100067; KEGG Reaction: http://identifiers.org/kegg.reaction/R03425; SEED Reaction: http://identifiers.org/seed.reaction/rxn06377
	r0635	S-aminomethyldihydrolipoylprotein:(6S)-tetrahydrofolate aminomethyltransferase (ammonia-forming)	s-aminomethyldihydrolipoyllysine-[h-protein][m] + tetrahydrofolate[m] => 5,10-methylenetetrahydrofolate[m] + dihydrolipoyllysine-[h-protein][m] + nh3[m]	2.1.2.10	CCM_06828	0	1000			kegg.reaction/R04125	Glycine, serine and threonine metabolism		Glycine, serine and threonine metabolism		2	GCCb	EC Number: http://identifiers.org/ec-code/2.1.2.10; MetaNetX (MNX) Equation: http://identifiers.org/metanetx.reaction/MNXR100068; KEGG Reaction: http://identifiers.org/kegg.reaction/R04125
	r0636	dihydrolipoylprotein:NAD+ oxidoreductase	dihydrolipoyllysine-[h-protein][m] + nad(+)[m] => lipoyllysine-[h-protein][m] + nadh[m]	1.8.1.4	CCM_01222	0	1000			kegg.reaction/R03815	Glycine, serine and threonine metabolism		Glycine, serine and threonine metabolism		2	GCCcm	EC Number: http://identifiers.org/ec-code/1.8.1.4; MetaNetX (MNX) Equation: http://identifiers.org/metanetx.reaction/MNXR100069; KEGG Reaction: http://identifiers.org/kegg.reaction/R03815; SEED Reaction: http://identifiers.org/seed.reaction/rxn06493
	r0638	phosphoribosyl-ATP pyrophosphohydrolase	1-(5-phospho-d-ribosyl)-atp[c] + h2o[c] => diphosphate[c] + phosphoribosyl-amp[c]	3.6.1.31;3.6.1.31	CCM_05425	0	1000			kegg.reaction/R04035	Histidine metabolism		Histidine metabolism		2	PRATPP	RHEA: http://identifiers.org/rhea/22828; RHEA: http://identifiers.org/rhea/22829; RHEA: http://identifiers.org/rhea/22830; RHEA: http://identifiers.org/rhea/22831; EC Number: http://identifiers.org/ec-code/3.6.1.31; BioCyc: http://identifiers.org/biocyc/META:HISTPRATPHYD-RXN; MetaNetX (MNX) Equation: http://identifiers.org/metanetx.reaction/MNXR103155; KEGG Reaction: http://identifiers.org/kegg.r…
	r0639	1-(5-phospho-D-ribosyl)-AMP 1,6-hydrolase	h2o[c] + phosphoribosyl-amp[c] => 1-(5-phospho-d-ribosyl)-5-[(5-phospho-d-ribosylamino)methylideneamino]imidazole-4-carboxamide[c]	3.5.4.19;3.5.4.19	CCM_05425	0	1000			kegg.reaction/R04037	Histidine metabolism		Histidine metabolism		2	PRACHh	RHEA: http://identifiers.org/rhea/20049; RHEA: http://identifiers.org/rhea/20050; RHEA: http://identifiers.org/rhea/20051; RHEA: http://identifiers.org/rhea/20052; EC Number: http://identifiers.org/ec-code/3.5.4.19; BioCyc: http://identifiers.org/biocyc/META:HISTCYCLOHYD-RXN; MetaNetX (MNX) Equation: http://identifiers.org/metanetx.reaction/MNXR103154; KEGG Reaction: http://identifiers.org/kegg.r…
	r0640	glutamine amidotransferase cyclase	5-[(5-phospho-1-deoxy-d-ribulos-1-ylamino)methylideneamino]-1-(5-phospho-d-ribosyl)imidazole-4-carboxamide[c] + l-glutamine[c] => 5-amino-1-(5-phospho-d-ribosyl)imidazole-4-carboxamide[c] + d-erythro-1-(imidazol-4-yl)glycerol 3-phosphate[c] + l-glutamate[c]	2.4.2.-;2.4.2.-;4.1.3.-	CCM_04678	0	1000			kegg.reaction/R04558	Histidine metabolism		Histidine metabolism		2	IG3PS	EC Number: http://identifiers.org/ec-code/2.4.2.-; RHEA: http://identifiers.org/rhea/24793; RHEA: http://identifiers.org/rhea/24794; RHEA: http://identifiers.org/rhea/24795; RHEA: http://identifiers.org/rhea/24796; EC Number: http://identifiers.org/ec-code/4.1.3.-; EC Number: http://identifiers.org/ec-code/4.3.2.M2; BioCyc: http://identifiers.org/biocyc/META:GLUTAMIDOTRANS-RXN; MetaNetX (MNX) Equ…
	r0641	S-adenosyl-L-methionine:L-histidine N-methyltransferase	l-histidine[c] + s-adenosyl-l-methionine[c] => n(pi)-methyl-l-histidine[c] + s-adenosyl-l-homocysteine[c]	2.1.1.-	(CCM_07460 and CCM_03926 and CCM_00363 and CCM_00325) or CCM_06888	0	1000			kegg.reaction/R01159	Histidine metabolism		Histidine metabolism		2	ARMT	EC Number: http://identifiers.org/ec-code/2.1.1.-; MetaNetX (MNX) Equation: http://identifiers.org/metanetx.reaction/MNXR141861; KEGG Reaction: http://identifiers.org/kegg.reaction/R01159; SEED Reaction: http://identifiers.org/seed.reaction/rxn00860
	r0642	N-(5'-phospho-D-ribosylformimino)-5-amino-1-(5''-phospho-D-ribosyl)-4-imidazolecarboxamide ketol-isomerase	1-(5-phospho-d-ribosyl)-5-[(5-phospho-d-ribosylamino)methylideneamino]imidazole-4-carboxamide[c] => 5-[(5-phospho-1-deoxy-d-ribulos-1-ylamino)methylideneamino]-1-(5-phospho-d-ribosyl)imidazole-4-carboxamide[c]	5.3.1.16;5.3.1.16	CCM_01437	0	1000			kegg.reaction/R04640	Histidine metabolism		Histidine metabolism		2	PRICIh	RHEA: http://identifiers.org/rhea/15469; RHEA: http://identifiers.org/rhea/15470; RHEA: http://identifiers.org/rhea/15471; RHEA: http://identifiers.org/rhea/15472; EC Number: http://identifiers.org/ec-code/5.3.1.16; BioCyc: http://identifiers.org/biocyc/META:PRIBFAICARPISOM-RXN; MetaNetX (MNX) Equation: http://identifiers.org/metanetx.reaction/MNXR103169; KEGG Reaction: http://identifiers.org/keg…
	r0643	D-erythro-1-(Imidazol-4-yl)glycerol 3-phosphate hydro-lyase	d-erythro-1-(imidazol-4-yl)glycerol 3-phosphate[c] => 3-(imidazol-4-yl)-2-oxopropyl phosphate[c] + h2o[c]	4.2.1.19;4.2.1.19	CCM_03120	0	1000			kegg.reaction/R03457	Histidine metabolism		Histidine metabolism		2	IGPDH	RHEA: http://identifiers.org/rhea/11040; RHEA: http://identifiers.org/rhea/11041; RHEA: http://identifiers.org/rhea/11042; RHEA: http://identifiers.org/rhea/11043; EC Number: http://identifiers.org/ec-code/4.2.1.19; BioCyc: http://identifiers.org/biocyc/META:IMIDPHOSDEHYD-RXN; MetaNetX (MNX) Equation: http://identifiers.org/metanetx.reaction/MNXR100813; KEGG Reaction: http://identifiers.org/kegg.…
	r0644	5-amino-2-oxopentanoate:2-oxoglutarate aminotransferase	3-(imidazol-4-yl)-2-oxopropyl phosphate[c] + l-glutamate[c] => 2-oxoglutarate[c] + l-histidinol phosphate[c]	2.6.1.9	CCM_04239	0	1000			kegg.reaction/R03243	Histidine metabolism		Histidine metabolism		2	HSTPT	EC Number: http://identifiers.org/ec-code/2.6.1.9; RHEA: http://identifiers.org/rhea/23744; RHEA: http://identifiers.org/rhea/23745; RHEA: http://identifiers.org/rhea/23746; RHEA: http://identifiers.org/rhea/23747; BioCyc: http://identifiers.org/biocyc/META:HISTAMINOTRANS-RXN; MetaNetX (MNX) Equation: http://identifiers.org/metanetx.reaction/MNXR95852; KEGG Reaction: http://identifiers.org/kegg.r…
	r0645	L-histidinol-phosphate phosphohydrolase	h2o[c] + l-histidinol phosphate[c] => l-histidinol[c] + phosphate[c]	3.1.3.15;3.1.3.15	CCM_07335	0	1000			kegg.reaction/R03013	Histidine metabolism		Histidine metabolism		2	HPh	RHEA: http://identifiers.org/rhea/14465; RHEA: http://identifiers.org/rhea/14466; RHEA: http://identifiers.org/rhea/14467; RHEA: http://identifiers.org/rhea/14468; EC Number: http://identifiers.org/ec-code/3.1.3.15; BioCyc: http://identifiers.org/biocyc/META:HISTIDPHOS-RXN; MetaNetX (MNX) Equation: http://identifiers.org/metanetx.reaction/MNXR100642; KEGG Reaction: http://identifiers.org/kegg.rea…
	r0647	L-histidinol:NAD+ oxidoreductase	h2o[c] + l-histidinol[c] + 2 nad(+)[c] => l-histidine[c] + 2 nadh[c]	1.1.1.23;1.1.1.23	CCM_05425	0	1000			kegg.reaction/R01158	Histidine metabolism		Histidine metabolism		2	HISTD	EC Number: http://identifiers.org/ec-code/1.1.1.23; RHEA: http://identifiers.org/rhea/20641; RHEA: http://identifiers.org/rhea/20642; RHEA: http://identifiers.org/rhea/20643; RHEA: http://identifiers.org/rhea/20644; BioCyc: http://identifiers.org/biocyc/META:RXN-8001; MetaNetX (MNX) Equation: http://identifiers.org/metanetx.reaction/MNXR100587; KEGG Reaction: http://identifiers.org/kegg.reaction/…
	r0648	L-valine:2-oxoglutarate aminotransferase	2-oxoglutarate[m] + l-valine[m] <=> 3-methyl-2-oxobutanoate[m] + l-glutamate[m]	2.6.1.42	CCM_04689 or CCM_09580	-1000	1000			kegg.reaction/R01214	Valine, leucine and isoleucine metabolism (Branched chain amino acids)		Valine, leucine and isoleucine metabolism (Branched chain amino acids)		2	VALTA	EC Number: http://identifiers.org/ec-code/2.6.1.42; EC Number: http://identifiers.org/ec-code/2.6.1.6; RHEA: http://identifiers.org/rhea/24813; RHEA: http://identifiers.org/rhea/24814; RHEA: http://identifiers.org/rhea/24815; RHEA: http://identifiers.org/rhea/24816; BioCyc: http://identifiers.org/biocyc/META:BRANCHED-CHAINAMINOTRANSFERVAL-RXN; MetaNetX (MNX) Equation: http://identifiers.org/metan…
	r0650	branched chain amino acid aminotransferase	2-oxoglutarate[c] + l-leucine[c] <=> 4-methyl-2-oxopentanoate[c] + l-glutamate[c]	2.6.1.42	CCM_04689 or CCM_09580	-1000	1000				Valine, leucine and isoleucine metabolism (Branched chain amino acids)		Valine, leucine and isoleucine metabolism (Branched chain amino acids)		2	ILETA	EC Number: http://identifiers.org/ec-code/2.6.1.42; RHEA: http://identifiers.org/rhea/24801; RHEA: http://identifiers.org/rhea/24802; RHEA: http://identifiers.org/rhea/24803; RHEA: http://identifiers.org/rhea/24804; BioCyc: http://identifiers.org/biocyc/META:BRANCHED-CHAINAMINOTRANSFERILEU-RXN; MetaNetX (MNX) Equation: http://identifiers.org/metanetx.reaction/MNXR96228; KEGG Reaction: http://iden…
	r0651	pyruvate:2-oxobutanoate acetaldehydetransferase (decarboxylating)	2-oxobutanoate[m] + pyruvate[m] => acetohydroxybutyrate[m] + co2[m]	2.2.1.6	(CCM_00646 and CCM_08845)	0	1000			kegg.reaction/R08648	Valine, leucine and isoleucine metabolism (Branched chain amino acids)		Valine, leucine and isoleucine metabolism (Branched chain amino acids)		2	POXAAT_h
	r0652	(S)-2-acetolactate methylmutase	2-acetolactate[m] => (r)-3-hydroxy-3-methyl-2-oxobutanoate[m]	1.1.1.86	CCM_01982	0	1000			kegg.reaction/R05071	Valine, leucine and isoleucine metabolism (Branched chain amino acids)		Valine, leucine and isoleucine metabolism (Branched chain amino acids)		2	KARI_3hmoa	EC Number: http://identifiers.org/ec-code/1.1.1.86; RHEA: http://identifiers.org/rhea/31255; RHEA: http://identifiers.org/rhea/31256; RHEA: http://identifiers.org/rhea/31257; RHEA: http://identifiers.org/rhea/31258; EC Number: http://identifiers.org/ec-code/5.4.99.3; BioCyc: http://identifiers.org/biocyc/META:2-ACETOLACTATE-MUTASE-RXN; MetaNetX (MNX) Equation: http://identifiers.org/metanetx.reac…
	r0653	(R)-2,3-dihydroxy-3-methylbutanoate:NADP+ oxidoreductase (isomerizing)	(r)-3-hydroxy-3-methyl-2-oxobutanoate[m] + nadph[m] => (r)-2,3-dihydroxy-3-methylbutanoate[m] + nadp(+)[m]	1.1.1.86	CCM_01982	0	1000			kegg.reaction/R04440	Valine, leucine and isoleucine metabolism (Branched chain amino acids)		Valine, leucine and isoleucine metabolism (Branched chain amino acids)		2	KARI_23dhmb	EC Number: http://identifiers.org/ec-code/1.1.1.86; RHEA: http://identifiers.org/rhea/31139; RHEA: http://identifiers.org/rhea/31140; RHEA: http://identifiers.org/rhea/31141; RHEA: http://identifiers.org/rhea/31142; MetaNetX (MNX) Equation: http://identifiers.org/metanetx.reaction/MNXR100904; KEGG Reaction: http://identifiers.org/kegg.reaction/R04440
	r0654	(S)-2-aceto-2-hydroxybutanoate:NADP+ oxidoreductase (isomerizing)	acetohydroxybutyrate[m] + nadph[m] => (r)-3-hydroxy-3-methyl-2-oxopentanoate[m] + nadp(+)[m]	1.1.1.86	CCM_01982	0	1000			kegg.reaction/R05069	Valine, leucine and isoleucine metabolism (Branched chain amino acids)		Valine, leucine and isoleucine metabolism (Branched chain amino acids)		2	KARI	EC Number: http://identifiers.org/ec-code/1.1.1.86; RHEA: http://identifiers.org/rhea/25404; RHEA: http://identifiers.org/rhea/25405; RHEA: http://identifiers.org/rhea/25406; RHEA: http://identifiers.org/rhea/25407; EC Number: http://identifiers.org/ec-code/5.4.99.3; BioCyc: http://identifiers.org/biocyc/META:RXN-14106; MetaNetX (MNX) Equation: http://identifiers.org/metanetx.reaction/MNXR100903;…
	r0655	(R)-2,3-dihydroxy-3-methylpentanoate:NADP+ oxidoreductase (isomerizing)	(r)-3-hydroxy-3-methyl-2-oxopentanoate[m] + nadph[m] => (2r,3r)-2,3-dihydroxy-3-methylpentanoate[m] + nadp(+)[m]	1.1.1.86	CCM_01982	0	1000			kegg.reaction/R05068	Valine, leucine and isoleucine metabolism (Branched chain amino acids)		Valine, leucine and isoleucine metabolism (Branched chain amino acids)		2	KARI_23dhmp	EC Number: http://identifiers.org/ec-code/1.1.1.86; MetaNetX (MNX) Equation: http://identifiers.org/metanetx.reaction/MNXR100905; KEGG Reaction: http://identifiers.org/kegg.reaction/R05068
	r0656	(R)-2,3-dihydroxy-3-methylbutanoate hydro-lyase	(r)-2,3-dihydroxy-3-methylbutanoate[m] => 3-methyl-2-oxobutanoate[m] + h2o[m]	4.2.1.9	CCM_05878 or CCM_03718 or CCM_09118	0	1000			kegg.reaction/R04441	Valine, leucine and isoleucine metabolism (Branched chain amino acids)		Valine, leucine and isoleucine metabolism (Branched chain amino acids)		2	DHAD1	RHEA: http://identifiers.org/rhea/24809; RHEA: http://identifiers.org/rhea/24810; RHEA: http://identifiers.org/rhea/24811; RHEA: http://identifiers.org/rhea/24812; EC Number: http://identifiers.org/ec-code/4.2.1.9; BioCyc: http://identifiers.org/biocyc/META:DIHYDROXYISOVALDEHYDRAT-RXN; MetaNetX (MNX) Equation: http://identifiers.org/metanetx.reaction/MNXR97358; KEGG Reaction: http://identifiers.o…
	r0657	(R)-2,3-dihydroxy-3-methylpentanoate:NADP+ oxidoreductase (isomerizing)	(2r,3r)-2,3-dihydroxy-3-methylpentanoate[m] => 3-methyl-2-oxopentanoate[m] + h2o[m]	4.2.1.9	CCM_05878 or CCM_03718 or CCM_09118	0	1000			kegg.reaction/R05068	Valine, leucine and isoleucine metabolism (Branched chain amino acids)		Valine, leucine and isoleucine metabolism (Branched chain amino acids)		2	KARI_23dhmp	EC Number: http://identifiers.org/ec-code/1.1.1.86; MetaNetX (MNX) Equation: http://identifiers.org/metanetx.reaction/MNXR100905; KEGG Reaction: http://identifiers.org/kegg.reaction/R05068
	r0658	acetyl-CoA:3-methyl-2-oxobutanoate C-acetyltransferase (thioester-hydrolysing, carboxymethyl-forming)	3-methyl-2-oxobutanoate[m] + acetyl-coa[m] + h2o[m] => 2-isopropylmalate[m] + coenzyme a[m]	2.3.3.13	CCM_05863	0	1000			kegg.reaction/R01213	Valine, leucine and isoleucine metabolism (Branched chain amino acids)		Valine, leucine and isoleucine metabolism (Branched chain amino acids)		2	IPPS	EC Number: http://identifiers.org/ec-code/2.3.3.13; RHEA: http://identifiers.org/rhea/21524; RHEA: http://identifiers.org/rhea/21525; RHEA: http://identifiers.org/rhea/21526; RHEA: http://identifiers.org/rhea/21527; BioCyc: http://identifiers.org/biocyc/META:2-ISOPROPYLMALATESYN-RXN; MetaNetX (MNX) Equation: http://identifiers.org/metanetx.reaction/MNXR100879; KEGG Reaction: http://identifiers.or…
	r0659	3-isopropylmalate hydro-lyase	2-isopropylmaleate[c] + h2o[c] <=> 3-isopropylmalate[c]	4.2.1.33	CCM_04181	-1000	1000			kegg.reaction/R04001	Valine, leucine and isoleucine metabolism (Branched chain amino acids)		Valine, leucine and isoleucine metabolism (Branched chain amino acids)		2	IPPMIa	RHEA: http://identifiers.org/rhea/10676; RHEA: http://identifiers.org/rhea/10677; RHEA: http://identifiers.org/rhea/10678; RHEA: http://identifiers.org/rhea/10679; EC Number: http://identifiers.org/ec-code/4.2.1.33; BioCyc: http://identifiers.org/biocyc/META:RXN-8991; MetaNetX (MNX) Equation: http://identifiers.org/metanetx.reaction/MNXR100827; KEGG Reaction: http://identifiers.org/kegg.reaction/…
	r0660	2-isopropylmalate hydro-lyase	2-isopropylmalate[c] <=> 2-isopropylmaleate[c] + h2o[c]	4.2.1.33	CCM_04181	-1000	1000			kegg.reaction/R03968	Valine, leucine and isoleucine metabolism (Branched chain amino acids)		Valine, leucine and isoleucine metabolism (Branched chain amino acids)		2	IMPHL_1_h
	r0661	3-isopropylmalate dehydrogenase	(2s)-2-isopropyl-3-oxosuccinate[c] + nadh[c] <=> 3-isopropylmalate[c] + nad(+)[c]	1.1.1.85	CCM_02117	-1000	1000				Valine, leucine and isoleucine metabolism (Branched chain amino acids)		Valine, leucine and isoleucine metabolism (Branched chain amino acids)		2	IPMD	EC Number: http://identifiers.org/ec-code/1.1.1.85; RHEA: http://identifiers.org/rhea/10892; RHEA: http://identifiers.org/rhea/10893; RHEA: http://identifiers.org/rhea/10894; RHEA: http://identifiers.org/rhea/10895; BioCyc: http://identifiers.org/biocyc/META:3-ISOPROPYLMALDEHYDROG-RXN; MetaNetX (MNX) Equation: http://identifiers.org/metanetx.reaction/MNXR100878; KEGG Reaction: http://identifiers.…
	r0662	3-methyl-2-oxobutanoate:[dihydrolipoyllysine-residue (2-methylpropanoyl)transferase] lipoyllysine 2-oxidoreductase (decarboxylating, acceptor-2-methylpropanoylating)	3-methyl-2-oxobutanoate[m] + lipoamide-[enzyme][m] => co2[m] + s-(2-methylpropionyl)-dihydrolipoamide-[enzyme][m]	1.2.4.4	CCM_04631 or CCM_00361	0	1000			kegg.reaction/R01701	Valine, leucine and isoleucine metabolism (Branched chain amino acids)		Valine, leucine and isoleucine metabolism (Branched chain amino acids)		2	4M2OPLOXRD	EC Number: http://identifiers.org/ec-code/1.2.4.4; MetaNetX (MNX) Equation: http://identifiers.org/metanetx.reaction/MNXR95029; SEED Reaction: http://identifiers.org/seed.reaction/rxn01245; SEED Reaction: http://identifiers.org/seed.reaction/rxn06031
	r0663	(S)-3-methyl-2-oxopentanoate:[dihydrolipoyllysine-residue (2-methylpropanoyl)transferase] lipoyllysine 2-oxidoreductase (decarboxylating, acceptor-2-methylpropanoylating)	3-methyl-2-oxopentanoate[m] + lipoamide-[enzyme][m] => co2[m] + s-(2-methylbutanoyl)-dihydrolipoamide-[enzyme][m]	1.2.4.4	CCM_04631 or CCM_00361	0	1000			kegg.reaction/R04225	Valine, leucine and isoleucine metabolism (Branched chain amino acids)		Valine, leucine and isoleucine metabolism (Branched chain amino acids)		2	4M2OPLOXRD	EC Number: http://identifiers.org/ec-code/1.2.4.4; MetaNetX (MNX) Equation: http://identifiers.org/metanetx.reaction/MNXR95029; SEED Reaction: http://identifiers.org/seed.reaction/rxn01245; SEED Reaction: http://identifiers.org/seed.reaction/rxn06031
	r0664	4-methyl-2-oxopentanoate:[dihydrolipoyllysine-residue (2-methylpropanoyl)transferase] lipoyllysine 2-oxidoreductase (decarboxylating, acceptor-2-methylpropanoylating)	4-methyl-2-oxopentanoate[m] + lipoamide-[enzyme][m] => co2[m] + s-(3-methylbutanoyl)-dihydrolipoamide-[enzyme][m]	1.2.4.4	CCM_04631 or CCM_00361	0	1000			kegg.reaction/R01702	Valine, leucine and isoleucine metabolism (Branched chain amino acids)		Valine, leucine and isoleucine metabolism (Branched chain amino acids)		2	4M2OPLOXRD	EC Number: http://identifiers.org/ec-code/1.2.4.4; MetaNetX (MNX) Equation: http://identifiers.org/metanetx.reaction/MNXR95029; SEED Reaction: http://identifiers.org/seed.reaction/rxn01245; SEED Reaction: http://identifiers.org/seed.reaction/rxn06031
	r0665	2-methylpropanoyl-CoA:enzyme N6-(dihydrolipoyl)lysine S-(2-methylpropanoyl)transferase	coenzyme a[m] + s-(2-methylpropionyl)-dihydrolipoamide-[enzyme][m] => dihydrolipoamide-[enzyme][m] + isobutyryl-coa[m]	2.3.1.168	CCM_05896	0	1000			kegg.reaction/R02662	Valine, leucine and isoleucine metabolism (Branched chain amino acids)		Valine, leucine and isoleucine metabolism (Branched chain amino acids)		2	DHRT_2mbcoa	EC Number: http://identifiers.org/ec-code/2.3.1.168; MetaNetX (MNX) Equation: http://identifiers.org/metanetx.reaction/MNXR97450; SEED Reaction: http://identifiers.org/seed.reaction/rxn02271
	r0666	(S)-2-methylbutanoyl-CoA:enzyme N6-(dihydrolipoyl)lysine S-(2-methylbutanoyl)transferase	coenzyme a[m] + s-(2-methylbutanoyl)-dihydrolipoamide-[enzyme][m] => 2-methylbutanoyl-coa[m] + dihydrolipoamide-[enzyme][m]	2.3.1.168	CCM_05896	0	1000			kegg.reaction/R03174	Valine, leucine and isoleucine metabolism (Branched chain amino acids)		Valine, leucine and isoleucine metabolism (Branched chain amino acids)		2	DHRT_2mbcoa	EC Number: http://identifiers.org/ec-code/2.3.1.168; MetaNetX (MNX) Equation: http://identifiers.org/metanetx.reaction/MNXR97450; SEED Reaction: http://identifiers.org/seed.reaction/rxn02271
	r0667	3-methylbutanoyl-CoA:enzyme N6-(dihydrolipoyl)lysine S-(3-methylbutanoyl)transferase	coenzyme a[m] + s-(3-methylbutanoyl)-dihydrolipoamide-[enzyme][m] => 3-isovaleryl-coa[m] + dihydrolipoamide-[enzyme][m]	2.3.1.168	CCM_05896	0	1000			kegg.reaction/R04097	Valine, leucine and isoleucine metabolism (Branched chain amino acids)		Valine, leucine and isoleucine metabolism (Branched chain amino acids)		2	DHRT_2mbcoa	EC Number: http://identifiers.org/ec-code/2.3.1.168; MetaNetX (MNX) Equation: http://identifiers.org/metanetx.reaction/MNXR97450; SEED Reaction: http://identifiers.org/seed.reaction/rxn02271
	r0669	2-methylpropanoyl-CoA:(acceptor) 2,3-oxidoreductase	fad[m] + isobutyryl-coa[m] => fadh2[m] + methacrylyl-coa[m]	1.3.99.2	CCM_00006	0	1000			kegg.reaction/R02661	Valine, leucine and isoleucine metabolism (Branched chain amino acids)		Valine, leucine and isoleucine metabolism (Branched chain amino acids)		2	ACOAD1	EC Number: http://identifiers.org/ec-code/1.3.1.44; EC Number: http://identifiers.org/ec-code/1.3.1.9; EC Number: http://identifiers.org/ec-code/1.3.99.2; BioCyc: http://identifiers.org/biocyc/META:RXN-12558; MetaNetX (MNX) Equation: http://identifiers.org/metanetx.reaction/MNXR95305; KEGG Reaction: http://identifiers.org/kegg.reaction/R01171; SEED Reaction: http://identifiers.org/seed.reaction/r…
	r0670	(S)-3-hydroxyisobutyryl-CoA hydro-lyase	h2o[m] + methacrylyl-coa[m] => (s)-3-hydroxyisobutyryl-coa[m]	4.2.1.17	CCM_09276 or CCM_05752	0	1000			kegg.reaction/R04224	Valine, leucine and isoleucine metabolism (Branched chain amino acids)		Valine, leucine and isoleucine metabolism (Branched chain amino acids)		2	ECOAH12m	RHEA: http://identifiers.org/rhea/31175; RHEA: http://identifiers.org/rhea/31176; RHEA: http://identifiers.org/rhea/31177; RHEA: http://identifiers.org/rhea/31178; EC Number: http://identifiers.org/ec-code/4.2.1.17; BioCyc: http://identifiers.org/biocyc/META:METHYLACYLYLCOA-HYDROXY-RXN; MetaNetX (MNX) Equation: http://identifiers.org/metanetx.reaction/MNXR138263; KEGG Reaction: http://identifiers…
	r0671	(S)-2-methylbutanoyl-CoA:acceptor 2,3-oxidoreductase	2-methylbutanoyl-coa[m] + fad[m] => 2-methylcrotonoyl-coa[m] + fadh2[m]	1.3.99.2	CCM_00006	0	1000			kegg.reaction/R03172	Valine, leucine and isoleucine metabolism (Branched chain amino acids)		Valine, leucine and isoleucine metabolism (Branched chain amino acids)		2	ACOAD1	EC Number: http://identifiers.org/ec-code/1.3.1.44; EC Number: http://identifiers.org/ec-code/1.3.1.9; EC Number: http://identifiers.org/ec-code/1.3.99.2; BioCyc: http://identifiers.org/biocyc/META:RXN-12558; MetaNetX (MNX) Equation: http://identifiers.org/metanetx.reaction/MNXR95305; KEGG Reaction: http://identifiers.org/kegg.reaction/R01171; SEED Reaction: http://identifiers.org/seed.reaction/r…
	r0672	(2S,3S)-3-hydroxy-2-methylbutanoyl-CoA hydro-liase	2-methylcrotonoyl-coa[m] + h2o[m] => (s)-3-hydroxy-2-methylbutyryl-coa[m]	4.2.1.17	CCM_09276 or CCM_05752	0	1000			kegg.reaction/R04204	Valine, leucine and isoleucine metabolism (Branched chain amino acids)		Valine, leucine and isoleucine metabolism (Branched chain amino acids)		2	ECOAH9m	RHEA: http://identifiers.org/rhea/31119; RHEA: http://identifiers.org/rhea/31120; RHEA: http://identifiers.org/rhea/31121; RHEA: http://identifiers.org/rhea/31122; EC Number: http://identifiers.org/ec-code/4.2.1.17; BioCyc: http://identifiers.org/biocyc/META:TIGLYLCOA-HYDROXY-RXN; MetaNetX (MNX) Equation: http://identifiers.org/metanetx.reaction/MNXR97894; KEGG Reaction: http://identifiers.org/ke…
	r0673	(2S,3S)-3-hydroxy-2-methylbutanoyl-CoA:NAD+ oxidoreductase	(s)-3-hydroxy-2-methylbutyryl-coa[m] + nad(+)[m] <=> 2-methylacetoacetyl-coa[m] + nadh[m]	1.1.1.35	CCM_06096	-1000	1000			kegg.reaction/R04203	Valine, leucine and isoleucine metabolism (Branched chain amino acids)		Valine, leucine and isoleucine metabolism (Branched chain amino acids)		2	HACD9m	EC Number: http://identifiers.org/ec-code/1.1.1.178; EC Number: http://identifiers.org/ec-code/1.1.1.35; RHEA: http://identifiers.org/rhea/13281; RHEA: http://identifiers.org/rhea/13282; RHEA: http://identifiers.org/rhea/13283; RHEA: http://identifiers.org/rhea/13284; BioCyc: http://identifiers.org/biocyc/META:1.1.1.178-RXN; MetaNetX (MNX) Equation: http://identifiers.org/metanetx.reaction/MNXR10…
	r0674	acetyl-CoA:propanoyl-CoA 2-C-acetyltransferase; 2-methylacetoacetyl-CoA thiolase	2-methylacetoacetyl-coa[m] + coenzyme a[m] => acetyl-coa[m] + propionyl-coa[m]	2.3.1.16	CCM_01627	0	1000			kegg.reaction/R00927	Valine, leucine and isoleucine metabolism (Branched chain amino acids)		Valine, leucine and isoleucine metabolism (Branched chain amino acids)		2	MACCOAT	EC Number: http://identifiers.org/ec-code/2.3.1.16; EC Number: http://identifiers.org/ec-code/2.3.1.9; RHEA: http://identifiers.org/rhea/30719; RHEA: http://identifiers.org/rhea/30720; RHEA: http://identifiers.org/rhea/30721; RHEA: http://identifiers.org/rhea/30722; BioCyc: http://identifiers.org/biocyc/META:METHYLACETOACETYLCOATHIOL-RXN; MetaNetX (MNX) Equation: http://identifiers.org/metanetx.r…
	r0675	L-isoleucine:2-oxoglutarate aminotransferase	2-oxoglutarate[m] + l-isoleucine[m] <=> 3-methyl-2-oxopentanoate[m] + l-glutamate[m]	2.6.1.42	CCM_04689 or CCM_09580 or CCM_06850	-1000	1000			kegg.reaction/R02199	Valine, leucine and isoleucine metabolism (Branched chain amino acids)		Valine, leucine and isoleucine metabolism (Branched chain amino acids)		2	ILETA	EC Number: http://identifiers.org/ec-code/2.6.1.42; RHEA: http://identifiers.org/rhea/24801; RHEA: http://identifiers.org/rhea/24802; RHEA: http://identifiers.org/rhea/24803; RHEA: http://identifiers.org/rhea/24804; BioCyc: http://identifiers.org/biocyc/META:BRANCHED-CHAINAMINOTRANSFERILEU-RXN; MetaNetX (MNX) Equation: http://identifiers.org/metanetx.reaction/MNXR96228; KEGG Reaction: http://iden…
	r0676	isovaleryl-CoA dehydrogenase	3-isovaleryl-coa[m] + fad[m] => 3-methylbut-2-enoyl-coa[m] + fadh2[m]	1.3.99.10	CCM_03372	0	1000			kegg.reaction/R04095	Valine, leucine and isoleucine metabolism (Branched chain amino acids)		Valine, leucine and isoleucine metabolism (Branched chain amino acids)		2	ACOAD8m	EC Number: http://identifiers.org/ec-code/1.3.8.4; EC Number: http://identifiers.org/ec-code/1.3.8.7; EC Number: http://identifiers.org/ec-code/1.3.99.10; RHEA: http://identifiers.org/rhea/12276; RHEA: http://identifiers.org/rhea/12277; RHEA: http://identifiers.org/rhea/12278; RHEA: http://identifiers.org/rhea/12279; RHEA: http://identifiers.org/rhea/31063; RHEA: http://identifiers.org/rhea/31064…
	r0677	3-methylcrotonoyl-CoA:carbon-dioxide ligase (ADP-forming)	3-methylbut-2-enoyl-coa[m] + atp[m] + co2[m] + h2o[m] => adp[m] + phosphate[m] + trans-3-methylglutaconyl-coa[m]	6.4.1.4	CCM_03431 and CCM_03373	0	1000			kegg.reaction/R04138	Valine, leucine and isoleucine metabolism (Branched chain amino acids)		Valine, leucine and isoleucine metabolism (Branched chain amino acids)		2	MCCCrm	EC Number: http://identifiers.org/ec-code/6.4.1.4; BioCyc: http://identifiers.org/biocyc/META:METHYLCROTONYL-COA-CARBOXYLASE-RXN; MetaNetX (MNX) Equation: http://identifiers.org/metanetx.reaction/MNXR101411; Reactome Reaction: http://identifiers.org/reactome/R-ATH-508308; Reactome Reaction: http://identifiers.org/reactome/R-ATH-70773; Reactome Reaction: http://identifiers.org/reactome/R-BTA-50830…
	r0678	(S)-3-hydroxy-3-methylglutaryl-CoA hydro-lyase (trans-3-methylglutaconyl-CoA-forming)	(s)-3-hydroxy-3-methylglutaryl-coa[m] <=> h2o[m] + trans-3-methylglutaconyl-coa[m]	4.2.1.18	CCM_03842	-1000	1000			kegg.reaction/R02085	Valine, leucine and isoleucine metabolism (Branched chain amino acids)		Valine, leucine and isoleucine metabolism (Branched chain amino acids)		2	MGCH	EC Number: http://identifiers.org/ec-code/4.2.1.18; MetaNetX (MNX) Equation: http://identifiers.org/metanetx.reaction/MNXR101513
	r0679	(S)-3-hydroxy-3-methylglutaryl-CoA acetoacetate-lyase (acetyl-CoA-forming)	(s)-3-hydroxy-3-methylglutaryl-coa[m] => acetoacetate[m] + acetyl-coa[m]	4.1.3.4	CCM_05188	0	1000			kegg.reaction/R01360	Valine, leucine and isoleucine metabolism (Branched chain amino acids)		Valine, leucine and isoleucine metabolism (Branched chain amino acids)		2	HMGLm	EC Number: http://identifiers.org/ec-code/4.1.3.4; MetaNetX (MNX) Equation: http://identifiers.org/metanetx.reaction/MNXR100662
	r0680	3-hydroxy-2-methylpropanoyl-CoA hydrolase	(s)-3-hydroxyisobutyryl-coa[m] + h2o[m] => 3-hydroxy-2-methylpropanoate[m] + coenzyme a[m]	3.1.2.4	CCM_03210	0	1000			kegg.reaction/R03352	Valine, leucine and isoleucine metabolism (Branched chain amino acids)		Valine, leucine and isoleucine metabolism (Branched chain amino acids)		2	3HBCOAHL	EC Number: http://identifiers.org/ec-code/3.1.2.4; MetaNetX (MNX) Equation: http://identifiers.org/metanetx.reaction/MNXR137943; SEED Reaction: http://identifiers.org/seed.reaction/rxn03433
	r0681	3-hydroxy-2-methylpropanoate:NAD+ oxidoreductase	3-hydroxy-2-methylpropanoate[m] + nad(+)[m] <=> 3-oxo-2-methylpropanoate[m] + nadh[m]	1.1.1.31;1.1.1.35	CCM_00032	-1000	1000			kegg.reaction/R02047	Valine, leucine and isoleucine metabolism (Branched chain amino acids)		Valine, leucine and isoleucine metabolism (Branched chain amino acids)		2	HMNO	EC Number: http://identifiers.org/ec-code/1.1.1.31; EC Number: http://identifiers.org/ec-code/1.1.1.35; RHEA: http://identifiers.org/rhea/31275; RHEA: http://identifiers.org/rhea/31276; RHEA: http://identifiers.org/rhea/31277; RHEA: http://identifiers.org/rhea/31278; BioCyc: http://identifiers.org/biocyc/META:3-HYDROXYISOBUTYRATE-DEHYDROGENASE-RXN; MetaNetX (MNX) Equation: http://identifiers.org/…
	r0682	2-methyl-3-oxopropanoate:NAD+ oxidoreductase (CoA-propanoylating)	3-oxo-2-methylpropanoate[m] + coenzyme a[m] + nad(+)[m] => co2[m] + nadh[m] + propionyl-coa[m]	1.2.1.27	CCM_06293	0	1000			kegg.reaction/R00922	Valine, leucine and isoleucine metabolism (Branched chain amino acids)		Valine, leucine and isoleucine metabolism (Branched chain amino acids)		2	MMSAD1m	EC Number: http://identifiers.org/ec-code/1.2.1.27; MetaNetX (MNX) Equation: http://identifiers.org/metanetx.reaction/MNXR101662; Reactome Reaction: http://identifiers.org/reactome/R-ATH-70893; Reactome Reaction: http://identifiers.org/reactome/R-BTA-70893; Reactome Reaction: http://identifiers.org/reactome/R-CEL-70893; Reactome Reaction: http://identifiers.org/reactome/R-CFA-70893; Reactome Reac…
	r0684	methylcitrate dehydratase	but-1-ene-1,2,4-tricarboxylate[m] + h2o[m] <=> homocitrate[m]	4.2.1.79;4.2.1.36	CCM_00810	-1000	1000				Lysine metabolism		Lysine metabolism		2	MCITD	RHEA: http://identifiers.org/rhea/17725; RHEA: http://identifiers.org/rhea/17726; RHEA: http://identifiers.org/rhea/17727; RHEA: http://identifiers.org/rhea/17728; EC Number: http://identifiers.org/ec-code/4.2.1.79; BioCyc: http://identifiers.org/biocyc/META:2-METHYLCITRATE-DEHYDRATASE-RXN; MetaNetX (MNX) Equation: http://identifiers.org/metanetx.reaction/MNXR101413; KEGG Reaction: http://identif…
	r0685	homoisocitrate hydro-lyase	but-1-ene-1,2,4-tricarboxylate[m] + h2o[m] <=> homoisocitrate[m]	4.2.1.36	CCM_07793	-1000	1000			kegg.reaction/R04371	Lysine metabolism		Lysine metabolism		2	HACNHm	RHEA: http://identifiers.org/rhea/15485; RHEA: http://identifiers.org/rhea/15486; RHEA: http://identifiers.org/rhea/15487; RHEA: http://identifiers.org/rhea/15488; EC Number: http://identifiers.org/ec-code/4.2.1.114; EC Number: http://identifiers.org/ec-code/4.2.1.36; BioCyc: http://identifiers.org/biocyc/META:HOMOACONITATE-HYDRATASE-RXN; MetaNetX (MNX) Equation: http://identifiers.org/metanetx.r…
	r0688	(1R,2S)-1-hydroxybutane-1,2,4-tricarboxylate:NAD+ oxidoreductase (decarboxylating)	homoisocitrate[m] + nad(+)[m] => 2-oxoadipate[m] + co2[m] + nadh[m]	1.1.1.87	CCM_06018	0	1000			kegg.reaction/R01934	Lysine metabolism		Lysine metabolism		2	OXAGm	EC Number: http://identifiers.org/ec-code/1.1.1.286; EC Number: http://identifiers.org/ec-code/1.1.1.87; MetaNetX (MNX) Equation: http://identifiers.org/metanetx.reaction/MNXR102234; KEGG Reaction: http://identifiers.org/kegg.reaction/R01936; SEED Reaction: http://identifiers.org/seed.reaction/rxn01420
	r0689	L-2-aminoadipate:2-oxoglutarate aminotransferase	2-oxoadipate[m] + l-glutamate[m] <=> 2-oxoglutarate[m] + l-2-aminoadipate[m]	2.6.1.39	CCM_00427	-1000	1000			kegg.reaction/R01939	Lysine metabolism		Lysine metabolism		2	AATA	RHEA: http://identifiers.org/rhea/12601; RHEA: http://identifiers.org/rhea/12602; RHEA: http://identifiers.org/rhea/12603; RHEA: http://identifiers.org/rhea/12604; EC Number: http://identifiers.org/ec-code/2.6.1.39; BioCyc: http://identifiers.org/biocyc/META:2-AMINOADIPATE-AMINOTRANSFERASE-RXN; MetaNetX (MNX) Equation: http://identifiers.org/metanetx.reaction/MNXR95160; Reactome Reaction: http://…
	r0690	N6-(L-1,3-dicarboxypropyl)-L-lysine:NAD+ oxidoreductase (L-lysine-forming)	2-oxoglutarate[c] + l-lysine[c] + nadh[c] <=> h2o[c] + l-saccharopine[c] + nad(+)[c]	1.5.1.7	CCM_03749 or CCM_04910	-1000	1000			kegg.reaction/R00715	Lysine metabolism		Lysine metabolism		2	SACCD2	EC Number: http://identifiers.org/ec-code/1.5.1.7; RHEA: http://identifiers.org/rhea/12440; RHEA: http://identifiers.org/rhea/12441; RHEA: http://identifiers.org/rhea/12442; RHEA: http://identifiers.org/rhea/12443; BioCyc: http://identifiers.org/biocyc/META:1.5.1.7-RXN; MetaNetX (MNX) Equation: http://identifiers.org/metanetx.reaction/MNXR104237; KEGG Reaction: http://identifiers.org/kegg.reactio…
	r0691	L-aspartate-4-semialdehyde hydro-lyase (adding pyruvate and cyclizing)	l-aspartate 4-semialdehyde[c] + pyruvate[c] => (s)-2,3-dihydrodipicolinate[c] + 2 h2o[c]	4.2.1.52;4.3.3.7	CCM_03105 or CCM_08247	0	1000			kegg.reaction/R02292	Lysine metabolism		Lysine metabolism		2
	r0693	phosphoenolpyruvate:D-erythrose-4-phosphate C-(1-carboxyvinyl)transferase (phosphate hydrolysing, 2-carboxy-2-oxoethyl-forming)	d-erythrose 4-phosphate[c] + h2o[c] + phosphoenolpyruvate[c] => 2-dehydro-3-deoxy-d-arabino-heptonate 7-phosphate[c] + phosphate[c]	2.5.1.54;2.5.1.54	CCM_05313 or CCM_05988 or CCM_06156	0	1000			kegg.reaction/R01826	Phenylalanine, tyrosine and tryptophan biosynthesis (Aromatic amino acids)		Phenylalanine, tyrosine and tryptophan biosynthesis (Aromatic amino acids)		2	DDPA	RHEA: http://identifiers.org/rhea/14717; RHEA: http://identifiers.org/rhea/14718; RHEA: http://identifiers.org/rhea/14719; RHEA: http://identifiers.org/rhea/14720; EC Number: http://identifiers.org/ec-code/2.5.1.54; BioCyc: http://identifiers.org/biocyc/META:DAHPSYN-RXN; MetaNetX (MNX) Equation: http://identifiers.org/metanetx.reaction/MNXR97218; Reactome Reaction: http://identifiers.org/reactome…
	r0694	2-dehydro-3-deoxy-D-arabino-heptonate 7-phosphate phosphate-lyase (cyclyzing)	2-dehydro-3-deoxy-d-arabino-heptonate 7-phosphate[c] => 3-dehydroquinate[c] + phosphate[c]	4.2.3.4;4.2.3.4	CCM_06613	0	1000			kegg.reaction/R03083	Phenylalanine, tyrosine and tryptophan biosynthesis (Aromatic amino acids)		Phenylalanine, tyrosine and tryptophan biosynthesis (Aromatic amino acids)		2	DHQS	RHEA: http://identifiers.org/rhea/21968; RHEA: http://identifiers.org/rhea/21969; RHEA: http://identifiers.org/rhea/21970; RHEA: http://identifiers.org/rhea/21971; EC Number: http://identifiers.org/ec-code/4.2.3.4; BioCyc: http://identifiers.org/biocyc/META:3-DEHYDROQUINATE-SYNTHASE-RXN; MetaNetX (MNX) Equation: http://identifiers.org/metanetx.reaction/MNXR97447; KEGG Reaction: http://identifiers…
	r0695	3-dehydroquinate hydro-lyase	3-dehydroquinate[c] => 3-dehydroshikimate[c] + h2o[c]	4.2.1.10;4.2.1.10	CCM_05999 or CCM_08444	0	1000			kegg.reaction/R03084	Phenylalanine, tyrosine and tryptophan biosynthesis (Aromatic amino acids)		Phenylalanine, tyrosine and tryptophan biosynthesis (Aromatic amino acids)		2	DHQTi	RHEA: http://identifiers.org/rhea/21096; RHEA: http://identifiers.org/rhea/21097; RHEA: http://identifiers.org/rhea/21098; RHEA: http://identifiers.org/rhea/21099; EC Number: http://identifiers.org/ec-code/4.2.1.10; BioCyc: http://identifiers.org/biocyc/META:3-DEHYDROQUINATE-DEHYDRATASE-RXN; MetaNetX (MNX) Equation: http://identifiers.org/metanetx.reaction/MNXR97449; KEGG Reaction: http://identif…
	r0696	shikimate:NADP+ 3-oxidoreductase	3-dehydroshikimate[c] + nadph[c] => nadp(+)[c] + shikimate[c]	1.1.1.25	CCM_07445	0	1000			kegg.reaction/R02413	Phenylalanine, tyrosine and tryptophan biosynthesis (Aromatic amino acids)		Phenylalanine, tyrosine and tryptophan biosynthesis (Aromatic amino acids)		2	SHK3Dr	EC Number: http://identifiers.org/ec-code/1.1.1.25; EC Number: http://identifiers.org/ec-code/1.1.1.282; RHEA: http://identifiers.org/rhea/17737; RHEA: http://identifiers.org/rhea/17738; RHEA: http://identifiers.org/rhea/17739; RHEA: http://identifiers.org/rhea/17740; BioCyc: http://identifiers.org/biocyc/META:SHIKIMATE-5-DEHYDROGENASE-RXN; MetaNetX (MNX) Equation: http://identifiers.org/metanetx…
	r0697	L-quinate:NAD+ 3-oxidoreductase	3-dehydroquinate[c] + nadh[c] <=> nad(+)[c] + quinate[c]	1.1.1.24	CCM_06001	-1000	1000			kegg.reaction/R01872	Phenylalanine, tyrosine and tryptophan biosynthesis (Aromatic amino acids)		Phenylalanine, tyrosine and tryptophan biosynthesis (Aromatic amino acids)		2	QUINDH	EC Number: http://identifiers.org/ec-code/1.1.1.24; EC Number: http://identifiers.org/ec-code/1.1.1.282; RHEA: http://identifiers.org/rhea/22364; RHEA: http://identifiers.org/rhea/22365; RHEA: http://identifiers.org/rhea/22366; RHEA: http://identifiers.org/rhea/22367; BioCyc: http://identifiers.org/biocyc/META:QUINATE-5-DEHYDROGENASE-RXN; MetaNetX (MNX) Equation: http://identifiers.org/metanetx.r…
	r0698	ATP:shikimate 3-phosphotransferase	atp[c] + shikimate[c] => adp[c] + shikimate 3-phosphate[c]	2.7.1.71;2.7.1.71	CCM_01512	0	1000			kegg.reaction/R02412	Phenylalanine, tyrosine and tryptophan biosynthesis (Aromatic amino acids)		Phenylalanine, tyrosine and tryptophan biosynthesis (Aromatic amino acids)		2	SKK	RHEA: http://identifiers.org/rhea/13121; RHEA: http://identifiers.org/rhea/13122; RHEA: http://identifiers.org/rhea/13123; RHEA: http://identifiers.org/rhea/13124; EC Number: http://identifiers.org/ec-code/2.7.1.71; BioCyc: http://identifiers.org/biocyc/META:SHIKIMATE-KINASE-RXN; MetaNetX (MNX) Equation: http://identifiers.org/metanetx.reaction/MNXR104379; Reactome Reaction: http://identifiers.or…
	r0699	phosphoenolpyruvate:3-phosphoshikimate 5-O-(1-carboxyvinyl)-transferase	phosphoenolpyruvate[c] + shikimate 3-phosphate[c] => 5-o-(1-carboxyvinyl)-3-phosphoshikimate[c] + phosphate[c]	2.5.1.19;2.5.1.19	CCM_07445	0	1000			kegg.reaction/R03460	Phenylalanine, tyrosine and tryptophan biosynthesis (Aromatic amino acids)		Phenylalanine, tyrosine and tryptophan biosynthesis (Aromatic amino acids)		2	PSCVT	EC Number: http://identifiers.org/ec-code/2.5.1.19; RHEA: http://identifiers.org/rhea/21256; RHEA: http://identifiers.org/rhea/21257; RHEA: http://identifiers.org/rhea/21258; RHEA: http://identifiers.org/rhea/21259; BioCyc: http://identifiers.org/biocyc/META:2.5.1.19-RXN; MetaNetX (MNX) Equation: http://identifiers.org/metanetx.reaction/MNXR103226; Reactome Reaction: http://identifiers.org/reacto…
	r0700	5-O-(1-carboxyvinyl)-3-phosphoshikimate phosphate-lyase (chorismate-forming)	5-o-(1-carboxyvinyl)-3-phosphoshikimate[c] => chorismate[c] + phosphate[c]	4.2.3.5;4.2.3.5	CCM_00984 or CCM_02121	0	1000			kegg.reaction/R01714	Phenylalanine, tyrosine and tryptophan biosynthesis (Aromatic amino acids)		Phenylalanine, tyrosine and tryptophan biosynthesis (Aromatic amino acids)		2	CHRS	RHEA: http://identifiers.org/rhea/21020; RHEA: http://identifiers.org/rhea/21021; RHEA: http://identifiers.org/rhea/21022; RHEA: http://identifiers.org/rhea/21023; EC Number: http://identifiers.org/ec-code/4.2.3.5; BioCyc: http://identifiers.org/biocyc/META:CHORISMATE-SYNTHASE-RXN; MetaNetX (MNX) Equation: http://identifiers.org/metanetx.reaction/MNXR96709; KEGG Reaction: http://identifiers.org/k…
	r0702	N-(5-phospho-D-ribosyl)anthranilate:pyrophosphate phosphoribosyl-transferase	5-phospho-alpha-d-ribose 1-diphosphate[c] + anthranilate[c] => diphosphate[c] + n-(5-phospho-d-ribosyl)anthranilate[c]	2.4.2.18	CCM_03860	0	1000			kegg.reaction/R01073	Phenylalanine, tyrosine and tryptophan biosynthesis (Aromatic amino acids)		Phenylalanine, tyrosine and tryptophan biosynthesis (Aromatic amino acids)		2	ANTPPT	RHEA: http://identifiers.org/rhea/11768; RHEA: http://identifiers.org/rhea/11769; RHEA: http://identifiers.org/rhea/11770; RHEA: http://identifiers.org/rhea/11771; EC Number: http://identifiers.org/ec-code/2.4.2.18; BioCyc: http://identifiers.org/biocyc/META:PRTRANS-RXN; MetaNetX (MNX) Equation: http://identifiers.org/metanetx.reaction/MNXR95842; KEGG Reaction: http://identifiers.org/kegg.reactio…
	r0705	L-serine hydro-lyase [adding 1-C-(indol-3-yl)glycerol 3-phosphate; L-tryptophan and glyceraldehyde-3-phosphate-forming]	1-(indol-3-yl)glycerol 3-phosphate[c] + l-serine[c] => d-glyceraldehyde 3-phosphate[c] + h2o[c] + l-tryptophan[c]	4.2.1.20;4.2.1.20	CCM_07486	0	1000			kegg.reaction/R02722	Phenylalanine, tyrosine and tryptophan biosynthesis (Aromatic amino acids)		Phenylalanine, tyrosine and tryptophan biosynthesis (Aromatic amino acids)		2	SERH	RHEA: http://identifiers.org/rhea/10532; RHEA: http://identifiers.org/rhea/10533; RHEA: http://identifiers.org/rhea/10534; RHEA: http://identifiers.org/rhea/10535; EC Number: http://identifiers.org/ec-code/4.2.1.20; BioCyc: http://identifiers.org/biocyc/META:TRYPSYN-RXN; MetaNetX (MNX) Equation: http://identifiers.org/metanetx.reaction/MNXR104343; KEGG Reaction: http://identifiers.org/kegg.reacti…
	r0706	L-tryptophan:oxygen 2,3-oxidoreductase (decyclizing)	l-tryptophan[c] + o2[c] => l-formylkynurenine[c]	1.13.11.11;1.13.11.52	CCM_02833 or CCM_03688 or CCM_06695	0	1000			kegg.reaction/R00678	Phenylalanine, tyrosine and tryptophan biosynthesis (Aromatic amino acids)		Phenylalanine, tyrosine and tryptophan biosynthesis (Aromatic amino acids)		2	TRPO2	EC Number: http://identifiers.org/ec-code/1.13.11.11; EC Number: http://identifiers.org/ec-code/1.13.11.52; RHEA: http://identifiers.org/rhea/24536; RHEA: http://identifiers.org/rhea/24537; RHEA: http://identifiers.org/rhea/24538; RHEA: http://identifiers.org/rhea/24539; BioCyc: http://identifiers.org/biocyc/META:RXN-8665; MetaNetX (MNX) Equation: http://identifiers.org/metanetx.reaction/MNXR1049…
	r0707	L-tryptophan decarboxy-lyase	l-tryptophan[c] => co2[c] + tryptamine[c]	4.1.1.28;4.1.1.105;4.1.1.28	CCM_04742	0	1000			kegg.reaction/R00685	Phenylalanine, tyrosine and tryptophan biosynthesis (Aromatic amino acids)		Phenylalanine, tyrosine and tryptophan biosynthesis (Aromatic amino acids)		2	LTDCL	RHEA: http://identifiers.org/rhea/30339; RHEA: http://identifiers.org/rhea/30340; RHEA: http://identifiers.org/rhea/30341; RHEA: http://identifiers.org/rhea/30342; EC Number: http://identifiers.org/ec-code/4.1.1.28; BioCyc: http://identifiers.org/biocyc/META:AROMATIC-L-AMINO-ACID-DECARBOXYLASE-RXN; MetaNetX (MNX) Equation: http://identifiers.org/metanetx.reaction/MNXR101250; KEGG Reaction: http:/…
	r0708	N-formyl-L-kynurenine amidohydrolase	h2o[c] + l-formylkynurenine[c] => formate[c] + l-kynurenine[c]	3.5.1.9	CCM_01689 or CCM_09320 or CCM_05607	0	1000			kegg.reaction/R01959	Phenylalanine, tyrosine and tryptophan biosynthesis (Aromatic amino acids)		Phenylalanine, tyrosine and tryptophan biosynthesis (Aromatic amino acids)		2	FKYNH	RHEA: http://identifiers.org/rhea/13009; RHEA: http://identifiers.org/rhea/13010; RHEA: http://identifiers.org/rhea/13011; RHEA: http://identifiers.org/rhea/13012; EC Number: http://identifiers.org/ec-code/3.5.1.9; BioCyc: http://identifiers.org/biocyc/META:ARYLFORMAMIDASE-RXN; MetaNetX (MNX) Equation: http://identifiers.org/metanetx.reaction/MNXR99596; Reactome Reaction: http://identifiers.org/r…
	r0709	L-kynurenine hydrolase	h2o[c] + l-kynurenine[c] => anthranilate[c] + l-alanine[c]	3.7.1.3;3.7.1.3	CCM_02834	0	1000			kegg.reaction/R00987	Phenylalanine, tyrosine and tryptophan biosynthesis (Aromatic amino acids)		Phenylalanine, tyrosine and tryptophan biosynthesis (Aromatic amino acids)		2	KYN	RHEA: http://identifiers.org/rhea/16813; RHEA: http://identifiers.org/rhea/16814; RHEA: http://identifiers.org/rhea/16815; RHEA: http://identifiers.org/rhea/16816; EC Number: http://identifiers.org/ec-code/3.7.1.3; BioCyc: http://identifiers.org/biocyc/META:KYNURENINASE-RXN; MetaNetX (MNX) Equation: http://identifiers.org/metanetx.reaction/MNXR100946; KEGG Reaction: http://identifiers.org/kegg.re…
	r0710	L-kynurenine,NADPH:oxygen oxidoreductase (3-hydroxylating)	l-kynurenine[m] + nadph[m] + o2[m] => 3-hydroxykynurenine[m] + h2o[m] + nadp(+)[m]	1.14.13.9	CCM_06016	0	1000			kegg.reaction/R01960	Phenylalanine, tyrosine and tryptophan biosynthesis (Aromatic amino acids)		Phenylalanine, tyrosine and tryptophan biosynthesis (Aromatic amino acids)		2	KYN3OX	EC Number: http://identifiers.org/ec-code/1.14.13.9; RHEA: http://identifiers.org/rhea/20545; RHEA: http://identifiers.org/rhea/20546; RHEA: http://identifiers.org/rhea/20547; RHEA: http://identifiers.org/rhea/20548; BioCyc: http://identifiers.org/biocyc/META:KYNURENINE-3-MONOOXYGENASE-RXN; MetaNetX (MNX) Equation: http://identifiers.org/metanetx.reaction/MNXR100947; Reactome Reaction: http://ide…
	r0711	3-hydroxy-L-kynurenine hydrolase	3-hydroxykynurenine[c] + h2o[c] => 3-hydroxyanthranilate[c] + l-alanine[c]	3.7.1.3	CCM_02834	0	1000			kegg.reaction/R02668	Phenylalanine, tyrosine and tryptophan biosynthesis (Aromatic amino acids)		Phenylalanine, tyrosine and tryptophan biosynthesis (Aromatic amino acids)		2	HKYNH	RHEA: http://identifiers.org/rhea/25143; RHEA: http://identifiers.org/rhea/25144; RHEA: http://identifiers.org/rhea/25145; RHEA: http://identifiers.org/rhea/25146; EC Number: http://identifiers.org/ec-code/3.7.1.3; BioCyc: http://identifiers.org/biocyc/META:3-HYDROXY-KYNURENINASE-RXN; MetaNetX (MNX) Equation: http://identifiers.org/metanetx.reaction/MNXR100656; Reactome Reaction: http://identifie…
	r0712	2-amino-3-carboxymuconate semialdehyde carboxy-lyase	2-amino-3-carboxymuconate semialdehyde[c] => 2-aminomuconic 6-semialdehyde[c] + co2[c]	4.1.1.45	CCM_00617 or CCM_01452	0	1000			kegg.reaction/R04323	Phenylalanine, tyrosine and tryptophan biosynthesis (Aromatic amino acids)		Phenylalanine, tyrosine and tryptophan biosynthesis (Aromatic amino acids)		2	PCLAD	RHEA: http://identifiers.org/rhea/16557; RHEA: http://identifiers.org/rhea/16558; RHEA: http://identifiers.org/rhea/16559; RHEA: http://identifiers.org/rhea/16560; EC Number: http://identifiers.org/ec-code/4.1.1.45; MetaNetX (MNX) Equation: http://identifiers.org/metanetx.reaction/MNXR102410; KEGG Reaction: http://identifiers.org/kegg.reaction/R04323; SEED Reaction: http://identifiers.org/seed.re…
	r0713	chorismate pyruvatemutase	chorismate[c] => prephenate[c]	5.4.99.5;5.4.99.5	CCM_04185	0	1000			kegg.reaction/R01715	Phenylalanine, tyrosine and tryptophan biosynthesis (Aromatic amino acids)		Phenylalanine, tyrosine and tryptophan biosynthesis (Aromatic amino acids)		2	CHORM	RHEA: http://identifiers.org/rhea/13897; RHEA: http://identifiers.org/rhea/13898; RHEA: http://identifiers.org/rhea/13899; RHEA: http://identifiers.org/rhea/13900; EC Number: http://identifiers.org/ec-code/5.4.99.5; BioCyc: http://identifiers.org/biocyc/META:CHORISMATEMUT-RXN; MetaNetX (MNX) Equation: http://identifiers.org/metanetx.reaction/MNXR96708; KEGG Reaction: http://identifiers.org/kegg.r…
	r0714	prephenate:NAD+ oxidoreductase(decarboxylating)	nad(+)[c] + prephenate[c] => 3-(4-hydroxyphenyl)pyruvate[c] + co2[c] + nadh[c]	1.3.1.12	CCM_09467	0	1000			kegg.reaction/R01728	Phenylalanine, tyrosine and tryptophan biosynthesis (Aromatic amino acids)		Phenylalanine, tyrosine and tryptophan biosynthesis (Aromatic amino acids)		2	PPOR_1	EC Number: http://identifiers.org/ec-code/1.3.1.12; RHEA: http://identifiers.org/rhea/13869; RHEA: http://identifiers.org/rhea/13870; RHEA: http://identifiers.org/rhea/13871; RHEA: http://identifiers.org/rhea/13872; BioCyc: http://identifiers.org/biocyc/META:PREPHENATEDEHYDROG-RXN; MetaNetX (MNX) Equation: http://identifiers.org/metanetx.reaction/MNXR103121; KEGG Reaction: http://identifiers.org/…
	r0715	prephenate:NADP+ oxidoreductase(decarboxylating)	nadp(+)[c] + prephenate[c] => 3-(4-hydroxyphenyl)pyruvate[c] + co2[c] + nadph[c]	1.3.1.13;1.3.1.13	CCM_09467	0	1000			kegg.reaction/R01730	Phenylalanine, tyrosine and tryptophan biosynthesis (Aromatic amino acids)		Phenylalanine, tyrosine and tryptophan biosynthesis (Aromatic amino acids)		2	PPND2	EC Number: http://identifiers.org/ec-code/1.3.1.13; RHEA: http://identifiers.org/rhea/21640; RHEA: http://identifiers.org/rhea/21641; RHEA: http://identifiers.org/rhea/21642; RHEA: http://identifiers.org/rhea/21643; BioCyc: http://identifiers.org/biocyc/META:PREPHENATE-DEHYDROGENASE-NADP+-RXN; MetaNetX (MNX) Equation: http://identifiers.org/metanetx.reaction/MNXR103122; KEGG Reaction: http://iden…
	r0717	L-phenylalanine:2-oxoglutarate aminotransferase	2-oxoglutarate[c] + l-phenylalanine[c] <=> keto-phenylpyruvate[c] + l-glutamate[c]	2.6.1.57	CCM_01874 or CCM_03801 or CCM_05868 or CCM_06988	-1000	1000			kegg.reaction/R00694	Phenylalanine, tyrosine and tryptophan biosynthesis (Aromatic amino acids)		Phenylalanine, tyrosine and tryptophan biosynthesis (Aromatic amino acids)		2	PHETA1	EC Number: http://identifiers.org/ec-code/2.6.1.1; EC Number: http://identifiers.org/ec-code/2.6.1.5; EC Number: http://identifiers.org/ec-code/2.6.1.57; EC Number: http://identifiers.org/ec-code/2.6.1.9; RHEA: http://identifiers.org/rhea/25152; RHEA: http://identifiers.org/rhea/25153; RHEA: http://identifiers.org/rhea/25154; RHEA: http://identifiers.org/rhea/25155; BioCyc: http://identifiers.org…
	r0718	L-tyrosine:2-oxoglutarate aminotransferase	2-oxoglutarate[c] + l-tyrosine[c] <=> 3-(4-hydroxyphenyl)pyruvate[c] + l-glutamate[c]	2.6.1.1;2.6.1.5	CCM_01874 or CCM_05388 or CCM_07489	-1000	1000			kegg.reaction/R00734	Phenylalanine, tyrosine and tryptophan biosynthesis (Aromatic amino acids)		Phenylalanine, tyrosine and tryptophan biosynthesis (Aromatic amino acids)		2	TYRTA	RHEA: http://identifiers.org/rhea/15093; RHEA: http://identifiers.org/rhea/15094; RHEA: http://identifiers.org/rhea/15095; RHEA: http://identifiers.org/rhea/15096; EC Number: http://identifiers.org/ec-code/2.6.1.1; EC Number: http://identifiers.org/ec-code/2.6.1.5; EC Number: http://identifiers.org/ec-code/2.6.1.57; EC Number: http://identifiers.org/ec-code/2.6.1.9; BioCyc: http://identifiers.org…
	r0719	4-hydroxyphenylpyruvate:oxygen oxidoreductase (hydroxylating,decarboxylating)	3-(4-hydroxyphenyl)pyruvate[c] + o2[c] => co2[c] + homogentisate[c]	1.13.11.27	CCM_00270 or CCM_06000 or CCM_08275	0	1000			kegg.reaction/R02521	Phenylalanine, tyrosine and tryptophan biosynthesis (Aromatic amino acids)		Phenylalanine, tyrosine and tryptophan biosynthesis (Aromatic amino acids)		2	34HPPOR	EC Number: http://identifiers.org/ec-code/1.13.11.27; RHEA: http://identifiers.org/rhea/16189; RHEA: http://identifiers.org/rhea/16190; RHEA: http://identifiers.org/rhea/16191; RHEA: http://identifiers.org/rhea/16192; BioCyc: http://identifiers.org/biocyc/META:4-HYDROXYPHENYLPYRUVATE-DIOXYGENASE-RXN; MetaNetX (MNX) Equation: http://identifiers.org/metanetx.reaction/MNXR94843; Reactome Reaction: h…
	r0720	homogentisate:oxygen 1,2-oxidoreductase (decyclizing)	homogentisate[c] + o2[c] => 4-maleylacetoacetate[c]	1.13.11.5	CCM_03401 or CCM_04397	0	1000			kegg.reaction/R02519	Phenylalanine, tyrosine and tryptophan biosynthesis (Aromatic amino acids)		Phenylalanine, tyrosine and tryptophan biosynthesis (Aromatic amino acids)		2	HGNTOR	EC Number: http://identifiers.org/ec-code/1.13.11.5; RHEA: http://identifiers.org/rhea/15449; RHEA: http://identifiers.org/rhea/15450; RHEA: http://identifiers.org/rhea/15451; RHEA: http://identifiers.org/rhea/15452; BioCyc: http://identifiers.org/biocyc/META:HOMOGENTISATE-12-DIOXYGENASE-RXN; MetaNetX (MNX) Equation: http://identifiers.org/metanetx.reaction/MNXR100628; Reactome Reaction: http://i…
	r0721	maleylacetoacetate isomerase	4-fumarylacetoacetate[c] <=> 4-maleylacetoacetate[c]	5.2.1.2	CCM_00183	-1000	1000			kegg.reaction/R03181	Phenylalanine, tyrosine and tryptophan biosynthesis (Aromatic amino acids)		Phenylalanine, tyrosine and tryptophan biosynthesis (Aromatic amino acids)		2	MACACI	RHEA: http://identifiers.org/rhea/14817; RHEA: http://identifiers.org/rhea/14818; RHEA: http://identifiers.org/rhea/14819; RHEA: http://identifiers.org/rhea/14820; EC Number: http://identifiers.org/ec-code/5.2.1.2; BioCyc: http://identifiers.org/biocyc/META:MALEYLACETOACETATE-ISOMERASE-RXN; MetaNetX (MNX) Equation: http://identifiers.org/metanetx.reaction/MNXR101325; Reactome Reaction: http://ide…
	r0722	4-fumarylacetoacetate fumarylhydrolase	4-fumarylacetoacetate[c] + h2o[c] => acetoacetate[c] + fumarate[c]	3.7.1.2	CCM_00824 or CCM_04449 or CCM_02796 or CCM_06934	0	1000			kegg.reaction/R01364	Phenylalanine, tyrosine and tryptophan biosynthesis (Aromatic amino acids)		Phenylalanine, tyrosine and tryptophan biosynthesis (Aromatic amino acids)		2	FUMAC	RHEA: http://identifiers.org/rhea/10244; RHEA: http://identifiers.org/rhea/10245; RHEA: http://identifiers.org/rhea/10246; RHEA: http://identifiers.org/rhea/10247; EC Number: http://identifiers.org/ec-code/3.7.1.2; BioCyc: http://identifiers.org/biocyc/META:FUMARYLACETOACETASE-RXN; MetaNetX (MNX) Equation: http://identifiers.org/metanetx.reaction/MNXR99706; Reactome Reaction: http://identifiers.o…
	r0724	L-phenylalanine:oxygen oxidoreductase (decarboxylating)	l-phenylalanine[c] + o2[c] => 2-phenylacetamide[c] + co2[c] + h2o[c]	1.11.1.7	CCM_01912 or CCM_09023 or CCM_08032	0	1000			kegg.reaction/R00698	Phenylalanine, tyrosine and tryptophan biosynthesis (Aromatic amino acids)		Phenylalanine, tyrosine and tryptophan biosynthesis (Aromatic amino acids)		2	HMR_7628
	r0725	2-phenylacetamide amidohydrolase	2-phenylacetamide[c] + h2o[c] => nh3[c] + phenylacetate[c]	3.5.1.4;3.5.1.4	CCM_00297 or CCM_00480 or CCM_01319 or CCM_01432 or CCM_01700 or CCM_01973 or CCM_02581 or CCM_02618 or CCM_03629 or CCM_06767 or CCM_07350 or CCM_08165 or CCM_08353 or CCM_08921 or CCM_09375 or CCM_09530 or CCM_09675 or CCM_00297 or CCM_01319 or CCM_01700 or CCM_01973 or CCM_02581 or CCM_02618 or CCM_02764 or CCM_03629 or CCM_07350 or CCM_08165 or CCM_08353 or CCM_08588 or CCM_08921 or CCM_09375…	0	1000			kegg.reaction/R02540	Phenylalanine, tyrosine and tryptophan biosynthesis (Aromatic amino acids)		Phenylalanine, tyrosine and tryptophan biosynthesis (Aromatic amino acids)		2	HMR_7756
	r0726	Indole-3-acetamide amidohydrolase	h2o[c] + indole-3-acetamide[c] => indole-3-acetate[c] + nh3[c]	3.5.1.4;3.5.1.-;3.5.1.4	CCM_00297 or CCM_00480 or CCM_01319 or CCM_01432 or CCM_01700 or CCM_01973 or CCM_02581 or CCM_02618 or CCM_03629 or CCM_06767 or CCM_07350 or CCM_08165 or CCM_08353 or CCM_08921 or CCM_09375 or CCM_09530 or CCM_09675 or CCM_00297 or CCM_01319 or CCM_01700 or CCM_01973 or CCM_02581 or CCM_02618 or CCM_02764 or CCM_03629 or CCM_07350 or CCM_08165 or CCM_08353 or CCM_08588 or CCM_08921 or CCM_09375…	0	1000			kegg.reaction/R03096	Phenylalanine, tyrosine and tryptophan biosynthesis (Aromatic amino acids)		Phenylalanine, tyrosine and tryptophan biosynthesis (Aromatic amino acids)		2	AMID3	EC Number: http://identifiers.org/ec-code/3.5.1.4; RHEA: http://identifiers.org/rhea/34371; RHEA: http://identifiers.org/rhea/34372; RHEA: http://identifiers.org/rhea/34373; RHEA: http://identifiers.org/rhea/34374; BioCyc: http://identifiers.org/biocyc/META:RXNN-404; MetaNetX (MNX) Equation: http://identifiers.org/metanetx.reaction/MNXR95814; KEGG Reaction: http://identifiers.org/kegg.reaction/R0…
	r0727	diamine transaminase	acetyl-coa[c] + spermidine[c] => coenzyme a[c] + n1-acetylspermidine[c]	2.6.1.29	CCM_04409	0	1000				Phenylalanine, tyrosine and tryptophan biosynthesis (Aromatic amino acids)		Phenylalanine, tyrosine and tryptophan biosynthesis (Aromatic amino acids)		2	DIAT	EC Number: http://identifiers.org/ec-code/2.3.1.57; RHEA: http://identifiers.org/rhea/33099; RHEA: http://identifiers.org/rhea/33100; RHEA: http://identifiers.org/rhea/33101; RHEA: http://identifiers.org/rhea/33102; BioCyc: http://identifiers.org/biocyc/META:RXN-9939; MetaNetX (MNX) Equation: http://identifiers.org/metanetx.reaction/MNXR97455; Reactome Reaction: http://identifiers.org/reactome/R-…
	r0728	polyamine oxidase	h2o[c] + n1-acetylspermidine[c] + o2[c] => 3-aminopropanal[c] + h2o2[c] + n-acetylputrescine[c]	1.5.3.11	CCM_08989	0	1000				Phenylalanine, tyrosine and tryptophan biosynthesis (Aromatic amino acids)		Phenylalanine, tyrosine and tryptophan biosynthesis (Aromatic amino acids)		2	POLYAO	RHEA: http://identifiers.org/rhea/26027; RHEA: http://identifiers.org/rhea/26028; RHEA: http://identifiers.org/rhea/26029; RHEA: http://identifiers.org/rhea/26030; MetaNetX (MNX) Equation: http://identifiers.org/metanetx.reaction/MNXR103057; SEED Reaction: http://identifiers.org/seed.reaction/rxn09878
	r0729	polyamine oxidase	n-acetylputrescine[c] + o2[c] => 3-aminopropanal[c] + 4-aminobutanal[c] + h2o2[c]	1.5.3.11	CCM_08989	0	1000				Phenylalanine, tyrosine and tryptophan biosynthesis (Aromatic amino acids)		Phenylalanine, tyrosine and tryptophan biosynthesis (Aromatic amino acids)		2	POLYAO	RHEA: http://identifiers.org/rhea/26027; RHEA: http://identifiers.org/rhea/26028; RHEA: http://identifiers.org/rhea/26029; RHEA: http://identifiers.org/rhea/26030; MetaNetX (MNX) Equation: http://identifiers.org/metanetx.reaction/MNXR103057; SEED Reaction: http://identifiers.org/seed.reaction/rxn09878
	r0730	L-kynurenine:2-oxoglutarate aminotransferase	2-oxoglutarate[c] + l-kynurenine[c] => 4-(2-aminophenyl)-2,4-dioxobutanoate[c] + l-glutamate[c]	2.6.1.7;2.6.1.7	CCM_08981	0	1000			kegg.reaction/R01956	Phenylalanine, tyrosine and tryptophan biosynthesis (Aromatic amino acids)		Phenylalanine, tyrosine and tryptophan biosynthesis (Aromatic amino acids)		2	KYNAKGAT	EC Number: http://identifiers.org/ec-code/2.6.1.7; MetaNetX (MNX) Equation: http://identifiers.org/metanetx.reaction/MNXR100948
	r0731	phenylethylalcohol:NAD+ oxidoreductase	2-phenylethanol[c] + nad(+)[c] <=> nadh[c] + phenylacetaldehyde[c]	1.1.1.90	CCM_07186	-1000	1000			kegg.reaction/R02611	Phenylalanine, tyrosine and tryptophan biosynthesis (Aromatic amino acids)		Phenylalanine, tyrosine and tryptophan biosynthesis (Aromatic amino acids)		2	ALCD25xi	EC Number: http://identifiers.org/ec-code/1.1.1.1; EC Number: http://identifiers.org/ec-code/1.1.1.90; BioCyc: http://identifiers.org/biocyc/META:RXN-7700; MetaNetX (MNX) Equation: http://identifiers.org/metanetx.reaction/MNXR95722; KEGG Reaction: http://identifiers.org/kegg.reaction/R02611; SEED Reaction: http://identifiers.org/seed.reaction/rxn01902
	r0732	phenylethylalcohol:NAD+ oxidoreductase	2-phenylethanol[m] + nad(+)[m] <=> nadh[m] + phenylacetaldehyde[m]	1.1.1.90	CCM_07186	-1000	1000			kegg.reaction/R02611	Phenylalanine, tyrosine and tryptophan biosynthesis (Aromatic amino acids)		Phenylalanine, tyrosine and tryptophan biosynthesis (Aromatic amino acids)		2	ALCD25xi	EC Number: http://identifiers.org/ec-code/1.1.1.1; EC Number: http://identifiers.org/ec-code/1.1.1.90; BioCyc: http://identifiers.org/biocyc/META:RXN-7700; MetaNetX (MNX) Equation: http://identifiers.org/metanetx.reaction/MNXR95722; KEGG Reaction: http://identifiers.org/kegg.reaction/R02611; SEED Reaction: http://identifiers.org/seed.reaction/rxn01902
	r0733	hydrogen-peroxide:hydrogen-peroxide oxidoreductase	2 h2o2[p] => 2 h2o[p] + o2[p]	1.11.1.6	CCM_02506 or CCM_07732	0	1000			kegg.reaction/R00009	Phenylalanine, tyrosine and tryptophan biosynthesis (Aromatic amino acids)		Phenylalanine, tyrosine and tryptophan biosynthesis (Aromatic amino acids)		2	CAT	EC Number: http://identifiers.org/ec-code/1.11.1.21; EC Number: http://identifiers.org/ec-code/1.11.1.6; RHEA: http://identifiers.org/rhea/20309; RHEA: http://identifiers.org/rhea/20310; RHEA: http://identifiers.org/rhea/20311; RHEA: http://identifiers.org/rhea/20312; BioCyc: http://identifiers.org/biocyc/META:CATAL-RXN; MetaNetX (MNX) Equation: http://identifiers.org/metanetx.reaction/MNXR96455;…
	r0734	hydrogen-peroxide:hydrogen-peroxide oxidoreductase	2 h2o2[m] => 2 h2o[m] + o2[m]	1.11.1.6	CCM_01912 or CCM_02506 or CCM_07732 or CCM_09023	0	1000			kegg.reaction/R00009	Phenylalanine, tyrosine and tryptophan biosynthesis (Aromatic amino acids)		Phenylalanine, tyrosine and tryptophan biosynthesis (Aromatic amino acids)		2	CAT	EC Number: http://identifiers.org/ec-code/1.11.1.21; EC Number: http://identifiers.org/ec-code/1.11.1.6; RHEA: http://identifiers.org/rhea/20309; RHEA: http://identifiers.org/rhea/20310; RHEA: http://identifiers.org/rhea/20311; RHEA: http://identifiers.org/rhea/20312; BioCyc: http://identifiers.org/biocyc/META:CATAL-RXN; MetaNetX (MNX) Equation: http://identifiers.org/metanetx.reaction/MNXR96455;…
	r0735	hydrogen-peroxide:hydrogen-peroxide oxidoreductase	2 h2o2[c] => 2 h2o[c] + o2[c]	1.11.1.6	CCM_02506	0	1000			kegg.reaction/R00009	Phenylalanine, tyrosine and tryptophan biosynthesis (Aromatic amino acids)		Phenylalanine, tyrosine and tryptophan biosynthesis (Aromatic amino acids)		2	CAT	EC Number: http://identifiers.org/ec-code/1.11.1.21; EC Number: http://identifiers.org/ec-code/1.11.1.6; RHEA: http://identifiers.org/rhea/20309; RHEA: http://identifiers.org/rhea/20310; RHEA: http://identifiers.org/rhea/20311; RHEA: http://identifiers.org/rhea/20312; BioCyc: http://identifiers.org/biocyc/META:CATAL-RXN; MetaNetX (MNX) Equation: http://identifiers.org/metanetx.reaction/MNXR96455;…
	r0736	hydrogen-peroxide:hydrogen-peroxide oxidoreductase	2 h2o2[e] => 2 h2o[e] + o2[e]	1.11.1.6	CCM_02506	0	1000			kegg.reaction/R00009	Phenylalanine, tyrosine and tryptophan biosynthesis (Aromatic amino acids)		Phenylalanine, tyrosine and tryptophan biosynthesis (Aromatic amino acids)		2	CAT	EC Number: http://identifiers.org/ec-code/1.11.1.21; EC Number: http://identifiers.org/ec-code/1.11.1.6; RHEA: http://identifiers.org/rhea/20309; RHEA: http://identifiers.org/rhea/20310; RHEA: http://identifiers.org/rhea/20311; RHEA: http://identifiers.org/rhea/20312; BioCyc: http://identifiers.org/biocyc/META:CATAL-RXN; MetaNetX (MNX) Equation: http://identifiers.org/metanetx.reaction/MNXR96455;…
	r0737	glutaryl-CoA:dihydrolipoamide S-succinyltransferase	coenzyme a[m] + s-glutaryldihydrolipoamide-[enzyme][m] => dihydrolipoamide-[enzyme][m] + glutaryl-coa[m]	2.3.1.61	CCM_01205	0	1000			kegg.reaction/R02571	Phenylalanine, tyrosine and tryptophan biosynthesis (Aromatic amino acids)		Phenylalanine, tyrosine and tryptophan biosynthesis (Aromatic amino acids)		2	2OXOADOXm	EC Number: http://identifiers.org/ec-code/1.2.1.52; EC Number: http://identifiers.org/ec-code/1.2.4.2; EC Number: http://identifiers.org/ec-code/1.8.1.4; EC Number: http://identifiers.org/ec-code/2.3.1.61; RHEA: http://identifiers.org/rhea/30795; RHEA: http://identifiers.org/rhea/30796; RHEA: http://identifiers.org/rhea/30797; RHEA: http://identifiers.org/rhea/30798; BioCyc: http://identifiers.or…
	r0738	2-oxoadipate:lipoamde 2-oxidoreductase(decarboxylating and acceptor-succinylating)	2-oxoadipate[m] + lipoamide-[enzyme][m] => co2[m] + s-glutaryldihydrolipoamide-[enzyme][m]	1.2.4.2	CCM_07430	0	1000			kegg.reaction/R01940	Phenylalanine, tyrosine and tryptophan biosynthesis (Aromatic amino acids)		Phenylalanine, tyrosine and tryptophan biosynthesis (Aromatic amino acids)		2	AKGDam	EC Number: http://identifiers.org/ec-code/1.2.4.2; MetaNetX (MNX) Equation: http://identifiers.org/metanetx.reaction/MNXR95657; SEED Reaction: http://identifiers.org/seed.reaction/rxn01243
	r0739	glutaryl-CoA:(acceptor) 2,3-oxidoreductase (decarboxylating)	fad[m] + glutaryl-coa[m] => co2[m] + crotonoyl-coa[m] + fadh2[m]	1.3.99.7	CCM_01359	0	1000			kegg.reaction/R02487	Phenylalanine, tyrosine and tryptophan biosynthesis (Aromatic amino acids)		Phenylalanine, tyrosine and tryptophan biosynthesis (Aromatic amino acids)		2	GLUTCOADHm	EC Number: http://identifiers.org/ec-code/1.3.8.6; EC Number: http://identifiers.org/ec-code/1.3.99.7; RHEA: http://identifiers.org/rhea/13389; RHEA: http://identifiers.org/rhea/13390; RHEA: http://identifiers.org/rhea/13391; RHEA: http://identifiers.org/rhea/13392; RHEA: http://identifiers.org/rhea/30847; RHEA: http://identifiers.org/rhea/30848; RHEA: http://identifiers.org/rhea/30849; RHEA: htt…
	r0740	(S)-3-hydroxybutanoyl-CoA hydro-lyase	crotonoyl-coa[m] + h2o[m] => 3-hydroxybutyryl-coa[m]	4.2.1.17	CCM_01474 or CCM_05752 or CCM_09276	0	1000				Phenylalanine, tyrosine and tryptophan biosynthesis (Aromatic amino acids)		Phenylalanine, tyrosine and tryptophan biosynthesis (Aromatic amino acids)		2	ECOAH1x	RHEA: http://identifiers.org/rhea/26558; RHEA: http://identifiers.org/rhea/26559; RHEA: http://identifiers.org/rhea/26560; RHEA: http://identifiers.org/rhea/26561; EC Number: http://identifiers.org/ec-code/4.2.1.150; EC Number: http://identifiers.org/ec-code/4.2.1.17; EC Number: http://identifiers.org/ec-code/4.2.1.55; BioCyc: http://identifiers.org/biocyc/META:RXN-11667; MetaNetX (MNX) Equation:…
	r0743	3-sulfo-L-alanine carboxy-lyase (taurine-forming)	l-cysteate[c] => co2[c] + taurine[c]	4.1.1.15;4.1.1.15;4.1.1.29	CCM_06124 or CCM_08740 or CCM_08965	0	1000			kegg.reaction/R01682	Taurine and hypotaurine metabolism		Taurine and hypotaurine metabolism		2	LCYSTCBOXL	RHEA: http://identifiers.org/rhea/25221; RHEA: http://identifiers.org/rhea/25222; RHEA: http://identifiers.org/rhea/25223; RHEA: http://identifiers.org/rhea/25224; EC Number: http://identifiers.org/ec-code/4.1.1.15; EC Number: http://identifiers.org/ec-code/4.1.1.29; BioCyc: http://identifiers.org/biocyc/META:CYSTAUR-RXN; MetaNetX (MNX) Equation: http://identifiers.org/metanetx.reaction/MNXR10103…
	r0744	taurine, 2-oxoglutarate:O2 oxidoreductase (sulfite-forming)	2-oxoglutarate[c] + o2[c] + taurine[c] => aminoacetaldehyde[c] + co2[c] + succinate[c] + sulfite[c]	1.14.11.17	CCM_08680 or CCM_08827	0	1000			kegg.reaction/R05320	Taurine and hypotaurine metabolism		Taurine and hypotaurine metabolism		2	TAUDO	EC Number: http://identifiers.org/ec-code/1.14.11.17; RHEA: http://identifiers.org/rhea/15909; RHEA: http://identifiers.org/rhea/15910; RHEA: http://identifiers.org/rhea/15911; RHEA: http://identifiers.org/rhea/15912; BioCyc: http://identifiers.org/biocyc/META:RXN0-299; MetaNetX (MNX) Equation: http://identifiers.org/metanetx.reaction/MNXR104730; KEGG Reaction: http://identifiers.org/kegg.reactio…
	r0746	phenylacetaldehyde:NAD+ oxidoreductase	h2o[c] + nad(+)[c] + phenylacetaldehyde[c] <=> nadh[c] + phenylacetate[c]	1.2.1.5	CCM_09155	-1000	1000			kegg.reaction/R02536	Phenylalanine, tyrosine and tryptophan biosynthesis (Aromatic amino acids)		Phenylalanine, tyrosine and tryptophan biosynthesis (Aromatic amino acids)		2	ALDD19xr	EC Number: http://identifiers.org/ec-code/1.2.1.39; EC Number: http://identifiers.org/ec-code/1.2.1.5; RHEA: http://identifiers.org/rhea/21392; RHEA: http://identifiers.org/rhea/21393; RHEA: http://identifiers.org/rhea/21394; RHEA: http://identifiers.org/rhea/21395; BioCyc: http://identifiers.org/biocyc/META:PHENDEHYD-RXN; MetaNetX (MNX) Equation: http://identifiers.org/metanetx.reaction/MNXR9574…
	r0747	phenylacetate:CoA ligase	atp[p] + coenzyme a[p] + phenylacetate[p] => amp[p] + diphosphate[p] + phenylacetyl-coa[p]	6.2.1.30	CCM_06033	0	1000			kegg.reaction/R02539	Phenylalanine, tyrosine and tryptophan biosynthesis (Aromatic amino acids)		Phenylalanine, tyrosine and tryptophan biosynthesis (Aromatic amino acids)		2	PACCOAL	RHEA: http://identifiers.org/rhea/20956; RHEA: http://identifiers.org/rhea/20957; RHEA: http://identifiers.org/rhea/20958; RHEA: http://identifiers.org/rhea/20959; EC Number: http://identifiers.org/ec-code/6.2.1.30; BioCyc: http://identifiers.org/biocyc/META:RXN-10819; MetaNetX (MNX) Equation: http://identifiers.org/metanetx.reaction/MNXR102315; Reactome Reaction: http://identifiers.org/reactome/…
	r0748	phenylacetate 2-hydroxylase	nadph[c] + o2[c] + phenylacetate[c] => 2-hydroxyphenylacetate[c] + h2o[c] + nadp(+)[c]	1.14.13.-	CCM_02553 or CCM_02612 or CCM_07933	0	1000				Phenylalanine, tyrosine and tryptophan biosynthesis (Aromatic amino acids)		Phenylalanine, tyrosine and tryptophan biosynthesis (Aromatic amino acids)		2	PHACA
	r0749	phenoxyacetate 4-hydroxylase	nadph[c] + o2[c] + phenoxyacetate[c] => 4-hydroxyphenoxyacetate[c] + h2o[c] + nadp(+)[c]	1.14.13.-	CCM_02553 or CCM_02612 or CCM_07933	0	1000				Phenylalanine, tyrosine and tryptophan biosynthesis (Aromatic amino acids)		Phenylalanine, tyrosine and tryptophan biosynthesis (Aromatic amino acids)		2	P45021A1r	EC Number: http://identifiers.org/ec-code/1.14.13; MetaNetX (MNX) Equation: http://identifiers.org/metanetx.reaction/MNXR102262
	r0750	phenylpyruvate carboxy-lyase (phenylacetaldehyde-forming)	keto-phenylpyruvate[c] => co2[c] + phenylacetaldehyde[c]	4.1.1.43	CCM_01231 or CCM_05869	0	1000			kegg.reaction/R01377	Phenylalanine, tyrosine and tryptophan biosynthesis (Aromatic amino acids)		Phenylalanine, tyrosine and tryptophan biosynthesis (Aromatic amino acids)		2	PPYRDC	RHEA: http://identifiers.org/rhea/14185; RHEA: http://identifiers.org/rhea/14186; RHEA: http://identifiers.org/rhea/14187; RHEA: http://identifiers.org/rhea/14188; EC Number: http://identifiers.org/ec-code/4.1.1.-; EC Number: http://identifiers.org/ec-code/4.1.1.43; BioCyc: http://identifiers.org/biocyc/META:PHENYLPYRUVATE-DECARBOXYLASE-RXN; MetaNetX (MNX) Equation: http://identifiers.org/metanet…
	r0752	3-indoleacetonitrile aminohydrolase	2 h2o[c] + indole-3-acetonitrile[c] => indole-3-acetate[c] + nh3[c]	3.5.5.1	CCM_04786 or CCM_00553	0	1000			kegg.reaction/R03093	Phenylalanine, tyrosine and tryptophan biosynthesis (Aromatic amino acids)		Phenylalanine, tyrosine and tryptophan biosynthesis (Aromatic amino acids)		2	IACAH
	r0753	3-hydroxyanthranilate:oxygen 3,4-oxidoreductase (decyclizing)	3-hydroxyanthranilate[c] + o2[c] => 2-amino-3-carboxymuconate semialdehyde[c]	1.13.11.6	CCM_02219	0	1000			kegg.reaction/R02665	Phenylalanine, tyrosine and tryptophan biosynthesis (Aromatic amino acids)		Phenylalanine, tyrosine and tryptophan biosynthesis (Aromatic amino acids)		2	3HAO	EC Number: http://identifiers.org/ec-code/1.13.11.6; RHEA: http://identifiers.org/rhea/17953; RHEA: http://identifiers.org/rhea/17954; RHEA: http://identifiers.org/rhea/17955; RHEA: http://identifiers.org/rhea/17956; MetaNetX (MNX) Equation: http://identifiers.org/metanetx.reaction/MNXR94889; Reactome Reaction: http://identifiers.org/reactome/R-BTA-71218; Reactome Reaction: http://identifiers.org…
	r0755	4-aminobutanal:NAD+ 1-oxidoreductase	4-aminobutanal[c] + h2o[c] + nad(+)[c] => gamma-aminobutyrate[c] + nadh[c]	1.2.1.3;1.2.1.-;1.2.1.19;1.2.1.3	CCM_00452 or CCM_05126 or CCM_08195 or CCM_08475 or CCM_02203 or CCM_05450 or CCM_07151 or CCM_09155	0	1000			kegg.reaction/R02549	beta Alanine metabolism		beta Alanine metabolism		2	ABUTD	EC Number: http://identifiers.org/ec-code/1.2.1.-; EC Number: http://identifiers.org/ec-code/1.2.1.19; EC Number: http://identifiers.org/ec-code/1.2.1.3; RHEA: http://identifiers.org/rhea/19105; RHEA: http://identifiers.org/rhea/19106; RHEA: http://identifiers.org/rhea/19107; RHEA: http://identifiers.org/rhea/19108; BioCyc: http://identifiers.org/biocyc/META:AMINOBUTDEHYDROG-RXN; MetaNetX (MNX) E…
	r0756	NAD-dependent aldehyde dehydrogenase	(s)-lactate[c] + nadh[c] <=> h2o[c] + lactaldehyde[c] + nad(+)[c]	1.2.1.3	CCM_05126 or CCM_08195 or CCM_08475 or CCM_00452 or CCM_02203 or CCM_05450 or CCM_07151 or CCM_09155	-1000	1000				beta Alanine metabolism		beta Alanine metabolism		2	ALDD20xm	EC Number: http://identifiers.org/ec-code/1.2.1.3; RHEA: http://identifiers.org/rhea/30867; RHEA: http://identifiers.org/rhea/30868; RHEA: http://identifiers.org/rhea/30869; RHEA: http://identifiers.org/rhea/30870; BioCyc: http://identifiers.org/biocyc/META:RXN-10715; MetaNetX (MNX) Equation: http://identifiers.org/metanetx.reaction/MNXR95744; KEGG Reaction: http://identifiers.org/kegg.reaction/R…
	r0757	3-aminopropanal:NAD+ oxidoreductase	3-aminopropanal[c] + h2o[c] + nad(+)[c] => beta-alanine[c] + nadh[c]	1.2.1.3;1.2.1.19;1.2.1.3;1.2.1.5	CCM_00452 or CCM_05126 or CCM_08195 or CCM_08475 or CCM_02203 or CCM_05450 or CCM_07151 or CCM_09155	0	1000			kegg.reaction/R00904	beta Alanine metabolism		beta Alanine metabolism		2	APOR	MetaNetX (MNX) Equation: http://identifiers.org/metanetx.reaction/MNXR95891
	r0758	NAD-dependent aldehyde dehydrogenase	(s)-lactate[m] + nadh[m] <=> h2o[m] + lactaldehyde[m] + nad(+)[m]	1.2.1.3	CCM_05126 or CCM_08195 or CCM_08475 or CCM_00452 or CCM_02203 or CCM_05450 or CCM_07151 or CCM_09155	-1000	1000				beta Alanine metabolism		beta Alanine metabolism		2	ALDD20xm	EC Number: http://identifiers.org/ec-code/1.2.1.3; RHEA: http://identifiers.org/rhea/30867; RHEA: http://identifiers.org/rhea/30868; RHEA: http://identifiers.org/rhea/30869; RHEA: http://identifiers.org/rhea/30870; BioCyc: http://identifiers.org/biocyc/META:RXN-10715; MetaNetX (MNX) Equation: http://identifiers.org/metanetx.reaction/MNXR95744; KEGG Reaction: http://identifiers.org/kegg.reaction/R…
	r0759	N-carbamoyl-beta-alanine amidohydrolase	h2o[c] + n-carbamoyl-beta-alanine[c] => beta-alanine[c] + co2[c] + nh3[c]	3.5.1.6	CCM_03627 or CCM_06895	0	1000			kegg.reaction/R00905	beta Alanine metabolism		beta Alanine metabolism		2	UPPN	RHEA: http://identifiers.org/rhea/11184; RHEA: http://identifiers.org/rhea/11185; RHEA: http://identifiers.org/rhea/11186; RHEA: http://identifiers.org/rhea/11187; EC Number: http://identifiers.org/ec-code/3.5.1.6; BioCyc: http://identifiers.org/biocyc/META:BETA-UREIDOPROPIONASE-RXN; MetaNetX (MNX) Equation: http://identifiers.org/metanetx.reaction/MNXR96347; Reactome Reaction: http://identifiers…
	r0762	primary-amine oxidase	h2o[c] + o2[c] + trimethylenediamine[c] => 3-aminopropanal[c] + h2o2[c] + nh3[c]	1.4.3.21	CCM_02614 or CCM_05218 or CCM_06912	0	1000				Glycerophospholipid biosynthesis		Glycerophospholipid biosynthesis		2	PAO	MetaNetX (MNX) Equation: http://identifiers.org/metanetx.reaction/MNXR94687
	r0763	L-alanine:tRNA(Ala) ligase (AMP-forming)	atp[c] + l-alanine[c] + transfer rna[c] => amp[c] + diphosphate[c] + l-alanyl-trna(ala)[c]	6.1.1.7	CCM_05475	0	1000			kegg.reaction/R03038	Aminoacyl tRNA biosynthesis		Aminoacyl tRNA biosynthesis		2	ALATRS	EC Number: http://identifiers.org/ec-code/6.1.1.7; MetaNetX (MNX) Equation: http://identifiers.org/metanetx.reaction/MNXR95701; Reactome Reaction: http://identifiers.org/reactome/R-HSA-379864; Reactome Reaction: http://identifiers.org/reactome/R-HSA-380177; SEED Reaction: http://identifiers.org/seed.reaction/rxn11112
	r0764	L-aspartate:tRNA(Asp) ligase (AMP-forming)	atp[c] + l-aspartate[c] + transfer rna[c] => amp[c] + diphosphate[c] + l-aspartyl-trna(asp)[c]	6.1.1.12	CCM_01094 or CCM_02981 or CCM_03248	0	1000			kegg.reaction/R05577	Aminoacyl tRNA biosynthesis		Aminoacyl tRNA biosynthesis		2	ASPTRS	EC Number: http://identifiers.org/ec-code/6.1.1.12; EC Number: http://identifiers.org/ec-code/6.1.1.23; MetaNetX (MNX) Equation: http://identifiers.org/metanetx.reaction/MNXR96101; KEGG Reaction: http://identifiers.org/kegg.reaction/R05577; SEED Reaction: http://identifiers.org/seed.reaction/rxn06936
	r0765	L-aspartate:tRNA(Asp) ligase (AMP-forming)	atp[m] + l-aspartate[m] + transfer rna[m] => amp[m] + diphosphate[m] + l-aspartyl-trna(asp)[m]	6.1.1.12	CCM_01094 or CCM_02981	0	1000			kegg.reaction/R05577	Aminoacyl tRNA biosynthesis		Aminoacyl tRNA biosynthesis		2	ASPTRS	EC Number: http://identifiers.org/ec-code/6.1.1.12; EC Number: http://identifiers.org/ec-code/6.1.1.23; MetaNetX (MNX) Equation: http://identifiers.org/metanetx.reaction/MNXR96101; KEGG Reaction: http://identifiers.org/kegg.reaction/R05577; SEED Reaction: http://identifiers.org/seed.reaction/rxn06936
	r0766	L-asparagine:tRNA(Asn) ligase (AMP-forming)	atp[m] + l-asparagine[m] + transfer rna[m] => amp[m] + diphosphate[m] + l-asparaginyl-trna(asn)[m]	6.1.1.22	CCM_01368	0	1000			kegg.reaction/R03648	Aminoacyl tRNA biosynthesis		Aminoacyl tRNA biosynthesis		2	ASNTRS_1	EC Number: http://identifiers.org/ec-code/6.1.1.22; MetaNetX (MNX) Equation: http://identifiers.org/metanetx.reaction/MNXR96064; Reactome Reaction: http://identifiers.org/reactome/R-HSA-379996; Reactome Reaction: http://identifiers.org/reactome/R-HSA-380227; KEGG Reaction: http://identifiers.org/kegg.reaction/R03648; SEED Reaction: http://identifiers.org/seed.reaction/rxn06434; SEED Reaction: htt…
	r0767	L-asparagine:tRNA(Asn) ligase (AMP-forming)	atp[c] + l-asparagine[c] + transfer rna[c] => amp[c] + diphosphate[c] + l-asparaginyl-trna(asn)[c]	6.1.1.22	CCM_00977 or CCM_08773	0	1000			kegg.reaction/R03648	Aminoacyl tRNA biosynthesis		Aminoacyl tRNA biosynthesis		2	ASNTRS_1	EC Number: http://identifiers.org/ec-code/6.1.1.22; MetaNetX (MNX) Equation: http://identifiers.org/metanetx.reaction/MNXR96064; Reactome Reaction: http://identifiers.org/reactome/R-HSA-379996; Reactome Reaction: http://identifiers.org/reactome/R-HSA-380227; KEGG Reaction: http://identifiers.org/kegg.reaction/R03648; SEED Reaction: http://identifiers.org/seed.reaction/rxn06434; SEED Reaction: htt…
	r0768	glutamate 5-kinase	atp[c] + l-glutamate[c] => adp[c] + d-alpha-glutamyl phosphate[c]	2.7.2.11	CCM_02626	0	1000				Aminoacyl tRNA biosynthesis		Aminoacyl tRNA biosynthesis		2	GLU5K	RHEA: http://identifiers.org/rhea/14877; RHEA: http://identifiers.org/rhea/14878; RHEA: http://identifiers.org/rhea/14879; RHEA: http://identifiers.org/rhea/14880; EC Number: http://identifiers.org/ec-code/2.7.2.11; BioCyc: http://identifiers.org/biocyc/META:GLUTKIN-RXN; MetaNetX (MNX) Equation: http://identifiers.org/metanetx.reaction/MNXR100277; KEGG Reaction: http://identifiers.org/kegg.reacti…
	r0769	L-arginine:tRNA(Arg) ligase (AMP-forming)	atp[c] + l-arginine[c] + transfer rna[c] => amp[c] + diphosphate[c] + l-arginyl-trna(arg)[c]	6.1.1.19	CCM_00078	0	1000			kegg.reaction/R03646	Aminoacyl tRNA biosynthesis		Aminoacyl tRNA biosynthesis		2	ARGTRS	EC Number: http://identifiers.org/ec-code/6.1.1.19; MetaNetX (MNX) Equation: http://identifiers.org/metanetx.reaction/MNXR95950; Reactome Reaction: http://identifiers.org/reactome/R-HSA-379993; Reactome Reaction: http://identifiers.org/reactome/R-HSA-380224; KEGG Reaction: http://identifiers.org/kegg.reaction/R03646; SEED Reaction: http://identifiers.org/seed.reaction/rxn06432
	r0770	L-proline:tRNA(Pro) ligase (AMP-forming)	atp[c] + l-proline[c] + transfer rna[c] => amp[c] + diphosphate[c] + l-prolyl-trna(pro)[c]	6.1.1.15	CCM_00895 or CCM_06645	0	1000			kegg.reaction/R03661	Aminoacyl tRNA biosynthesis		Aminoacyl tRNA biosynthesis		2	PROTRS	EC Number: http://identifiers.org/ec-code/6.1.1.15; MetaNetX (MNX) Equation: http://identifiers.org/metanetx.reaction/MNXR103208; Reactome Reaction: http://identifiers.org/reactome/R-HSA-379865; Reactome Reaction: http://identifiers.org/reactome/R-HSA-380198; KEGG Reaction: http://identifiers.org/kegg.reaction/R03661; SEED Reaction: http://identifiers.org/seed.reaction/rxn06445
	r0771	L-cysteine:tRNA(Cys) ligase (AMP-forming)	atp[c] + l-cysteine[c] + transfer rna[c] => amp[c] + diphosphate[c] + l-cysteinyl-trna(cys)[c]	3.1.1.16;6.1.1.16	CCM_08883	0	1000			kegg.reaction/R03650	Aminoacyl tRNA biosynthesis		Aminoacyl tRNA biosynthesis		2	CYSTRS	EC Number: http://identifiers.org/ec-code/6.1.1.15; EC Number: http://identifiers.org/ec-code/6.1.1.16; MetaNetX (MNX) Equation: http://identifiers.org/metanetx.reaction/MNXR97018; Reactome Reaction: http://identifiers.org/reactome/R-HSA-379887; Reactome Reaction: http://identifiers.org/reactome/R-HSA-380158; KEGG Reaction: http://identifiers.org/kegg.reaction/R03650; SEED Reaction: http://identi…
	r0772	L-glutamate:tRNA(Glu) ligase (AMP-forming)	atp[m] + l-glutamate[m] + transfer rna[m] => amp[m] + diphosphate[m] + l-glutamyl-trna(glu)[m]	6.1.1.17	CCM_09428	0	1000			kegg.reaction/R05578	Aminoacyl tRNA biosynthesis		Aminoacyl tRNA biosynthesis		2	GLUTRS	EC Number: http://identifiers.org/ec-code/6.1.1; EC Number: http://identifiers.org/ec-code/6.1.1.17; EC Number: http://identifiers.org/ec-code/6.1.1.24; MetaNetX (MNX) Equation: http://identifiers.org/metanetx.reaction/MNXR100295; Reactome Reaction: http://identifiers.org/reactome/R-HSA-379861; Reactome Reaction: http://identifiers.org/reactome/R-HSA-380216; KEGG Reaction: http://identifiers.org/…
	r0773	L-glutamate:tRNA(Glu) ligase (AMP-forming)	atp[c] + l-glutamate[c] + transfer rna[c] => amp[c] + diphosphate[c] + l-glutamyl-trna(glu)[c]	6.1.1.17	CCM_01939 or CCM_07973	0	1000			kegg.reaction/R05578	Aminoacyl tRNA biosynthesis		Aminoacyl tRNA biosynthesis		2	GLUTRS	EC Number: http://identifiers.org/ec-code/6.1.1; EC Number: http://identifiers.org/ec-code/6.1.1.17; EC Number: http://identifiers.org/ec-code/6.1.1.24; MetaNetX (MNX) Equation: http://identifiers.org/metanetx.reaction/MNXR100295; Reactome Reaction: http://identifiers.org/reactome/R-HSA-379861; Reactome Reaction: http://identifiers.org/reactome/R-HSA-380216; KEGG Reaction: http://identifiers.org/…
	r0774	L-glutamine:tRNA(Gln) ligase (AMP-forming)	atp[c] + l-glutamine[c] + transfer rna[c] => amp[c] + diphosphate[c] + l-glutaminyl-trna(gln)[c]	6.1.1.18	CCM_05656 or CCM_05672	0	1000			kegg.reaction/R03652	Aminoacyl tRNA biosynthesis		Aminoacyl tRNA biosynthesis		2	GLNTRS	EC Number: http://identifiers.org/ec-code/6.1.1.18; MetaNetX (MNX) Equation: http://identifiers.org/metanetx.reaction/MNXR100257; Reactome Reaction: http://identifiers.org/reactome/R-HSA-379982; Reactome Reaction: http://identifiers.org/reactome/R-HSA-380241; KEGG Reaction: http://identifiers.org/kegg.reaction/R03652; SEED Reaction: http://identifiers.org/seed.reaction/rxn06437
	r0775	L-glutamine:tRNA(Gln) ligase (AMP-forming)	atp[m] + l-glutamine[m] + transfer rna[m] => amp[m] + diphosphate[m] + l-glutaminyl-trna(gln)[m]	6.1.1.18	CCM_01003	0	1000			kegg.reaction/R03652	Aminoacyl tRNA biosynthesis		Aminoacyl tRNA biosynthesis		2	GLNTRS	EC Number: http://identifiers.org/ec-code/6.1.1.18; MetaNetX (MNX) Equation: http://identifiers.org/metanetx.reaction/MNXR100257; Reactome Reaction: http://identifiers.org/reactome/R-HSA-379982; Reactome Reaction: http://identifiers.org/reactome/R-HSA-380241; KEGG Reaction: http://identifiers.org/kegg.reaction/R03652; SEED Reaction: http://identifiers.org/seed.reaction/rxn06437
	r0776	L-serine:tRNA(Ser) ligase (AMP-forming)	atp[c] + l-serine[c] + transfer rna[c] => amp[c] + diphosphate[c] + l-seryl-trna(ser)[c]	6.1.1.11	CCM_01776 or CCM_03943	0	1000			kegg.reaction/R03662	Aminoacyl tRNA biosynthesis		Aminoacyl tRNA biosynthesis		2	SERTRS	EC Number: http://identifiers.org/ec-code/6.1.1.11; MetaNetX (MNX) Equation: http://identifiers.org/metanetx.reaction/MNXR104350; KEGG Reaction: http://identifiers.org/kegg.reaction/R03662; SEED Reaction: http://identifiers.org/seed.reaction/rxn06446
	r0777	glycine:tRNA(Gly) ligase (AMP-forming)	atp[c] + glycine[c] + transfer rna[c] => amp[c] + diphosphate[c] + glycyl-trna(gly)[c]	6.1.1.14	CCM_02628 or CCM_04685	0	1000			kegg.reaction/R03654	Aminoacyl tRNA biosynthesis		Aminoacyl tRNA biosynthesis		2	GLYTLm	EC Number: http://identifiers.org/ec-code/6.1.1.14; MetaNetX (MNX) Equation: http://identifiers.org/metanetx.reaction/MNXR100365; Reactome Reaction: http://identifiers.org/reactome/R-HSA-380048; Reactome Reaction: http://identifiers.org/reactome/R-HSA-380240; KEGG Reaction: http://identifiers.org/kegg.reaction/R03654; SEED Reaction: http://identifiers.org/seed.reaction/rxn06438
	r0778	L-threonine:tRNA(Thr) ligase (AMP-forming)	atp[m] + l-threonine[m] + transfer rna[m] => amp[m] + diphosphate[m] + l-threonyl-trna(thr)[m]	6.1.1.3	CCM_00105 or CCM_06949	0	1000			kegg.reaction/R03663	Aminoacyl tRNA biosynthesis		Aminoacyl tRNA biosynthesis		2	THRTRS	EC Number: http://identifiers.org/ec-code/6.1.1.3; MetaNetX (MNX) Equation: http://identifiers.org/metanetx.reaction/MNXR104848; Reactome Reaction: http://identifiers.org/reactome/R-HSA-380002; Reactome Reaction: http://identifiers.org/reactome/R-HSA-380201; KEGG Reaction: http://identifiers.org/kegg.reaction/R03663; SEED Reaction: http://identifiers.org/seed.reaction/rxn06447
	r0779	L-threonine:tRNA(Thr) ligase (AMP-forming)	atp[c] + l-threonine[c] + transfer rna[c] => amp[c] + diphosphate[c] + l-threonyl-trna(thr)[c]	6.1.1.3	CCM_00105 or CCM_06949	0	1000			kegg.reaction/R03663	Aminoacyl tRNA biosynthesis		Aminoacyl tRNA biosynthesis		2	THRTRS	EC Number: http://identifiers.org/ec-code/6.1.1.3; MetaNetX (MNX) Equation: http://identifiers.org/metanetx.reaction/MNXR104848; Reactome Reaction: http://identifiers.org/reactome/R-HSA-380002; Reactome Reaction: http://identifiers.org/reactome/R-HSA-380201; KEGG Reaction: http://identifiers.org/kegg.reaction/R03663; SEED Reaction: http://identifiers.org/seed.reaction/rxn06447
	r0780	L-histidine:tRNA(His) ligase (AMP-forming)	atp[c] + l-histidine[c] + transfer rna[c] => amp[c] + diphosphate[c] + l-histidyl-trna(his)[c]	6.1.1.21	CCM_02343	0	1000			kegg.reaction/R03655	Aminoacyl tRNA biosynthesis		Aminoacyl tRNA biosynthesis		2	HISTRS	EC Number: http://identifiers.org/ec-code/6.1.1.21; MetaNetX (MNX) Equation: http://identifiers.org/metanetx.reaction/MNXR100643; Reactome Reaction: http://identifiers.org/reactome/R-HSA-379844; Reactome Reaction: http://identifiers.org/reactome/R-HSA-380234; KEGG Reaction: http://identifiers.org/kegg.reaction/R03655; SEED Reaction: http://identifiers.org/seed.reaction/rxn06439
	r0781	L-isoleucine:tRNA(Ile) ligase (AMP-forming)	atp[c] + l-isoleucine[c] + transfer rna[c] => amp[c] + diphosphate[c] + l-isoleucyl-trna(ile)[c]	6.1.1.5	CCM_07464	0	1000			kegg.reaction/R03656	Aminoacyl tRNA biosynthesis		Aminoacyl tRNA biosynthesis		2	ILETRSm	EC Number: http://identifiers.org/ec-code/6.1.1.5; MetaNetX (MNX) Equation: http://identifiers.org/metanetx.reaction/MNXR100820; Reactome Reaction: http://identifiers.org/reactome/R-HSA-379893; Reactome Reaction: http://identifiers.org/reactome/R-HSA-380176; KEGG Reaction: http://identifiers.org/kegg.reaction/R03656; SEED Reaction: http://identifiers.org/seed.reaction/rxn06440
	r0782	L-isoleucine:tRNA(Ile) ligase (AMP-forming)	atp[m] + l-isoleucine[m] + transfer rna[m] => amp[m] + diphosphate[m] + l-isoleucyl-trna(ile)[m]	6.1.1.5	CCM_04746	0	1000			kegg.reaction/R03656	Aminoacyl tRNA biosynthesis		Aminoacyl tRNA biosynthesis		2	ILETRSm	EC Number: http://identifiers.org/ec-code/6.1.1.5; MetaNetX (MNX) Equation: http://identifiers.org/metanetx.reaction/MNXR100820; Reactome Reaction: http://identifiers.org/reactome/R-HSA-379893; Reactome Reaction: http://identifiers.org/reactome/R-HSA-380176; KEGG Reaction: http://identifiers.org/kegg.reaction/R03656; SEED Reaction: http://identifiers.org/seed.reaction/rxn06440
	r0783	L-valine:tRNAVal ligase (AMP-forming)	atp[c] + l-valine[c] + transfer rna[c] => amp[c] + diphosphate[c] + l-valyl-trna(val)[c]	6.1.1.9	CCM_06387	0	1000			kegg.reaction/R03665	Aminoacyl tRNA biosynthesis		Aminoacyl tRNA biosynthesis		2	VALTRS	EC Number: http://identifiers.org/ec-code/6.1.1.9; MetaNetX (MNX) Equation: http://identifiers.org/metanetx.reaction/MNXR105186; Reactome Reaction: http://identifiers.org/reactome/R-HSA-380042; Reactome Reaction: http://identifiers.org/reactome/R-HSA-380199; KEGG Reaction: http://identifiers.org/kegg.reaction/R03665; SEED Reaction: http://identifiers.org/seed.reaction/rxn06449
	r0784	L-leucine:tRNA(Leu) ligase (AMP-forming)	atp[c] + l-leucine[c] + transfer rna[c] => amp[c] + diphosphate[c] + l-leucyl-trna(leu)[c]	6.1.1.4	CCM_00227 or CCM_05622	0	1000			kegg.reaction/R03657	Aminoacyl tRNA biosynthesis		Aminoacyl tRNA biosynthesis		2	LEUTRS	EC Number: http://identifiers.org/ec-code/6.1.1.4; MetaNetX (MNX) Equation: http://identifiers.org/metanetx.reaction/MNXR101053; Reactome Reaction: http://identifiers.org/reactome/R-HSA-379974; Reactome Reaction: http://identifiers.org/reactome/R-HSA-380200; KEGG Reaction: http://identifiers.org/kegg.reaction/R03657; SEED Reaction: http://identifiers.org/seed.reaction/rxn06441
	r0785	L-lysine:tRNALys ligase (AMP-forming)	atp[c] + l-lysine[c] + transfer rna[c] => amp[c] + diphosphate[c] + l-lysyl-trna(lys)[c]	6.1.1.6	CCM_00818 or CCM_05434	0	1000			kegg.reaction/R03658	Aminoacyl tRNA biosynthesis		Aminoacyl tRNA biosynthesis		2	LYSTRS	EC Number: http://identifiers.org/ec-code/6.1.1.6; MetaNetX (MNX) Equation: http://identifiers.org/metanetx.reaction/MNXR101264; Reactome Reaction: http://identifiers.org/reactome/R-HSA-380008; Reactome Reaction: http://identifiers.org/reactome/R-HSA-380233; KEGG Reaction: http://identifiers.org/kegg.reaction/R03658; SEED Reaction: http://identifiers.org/seed.reaction/rxn06442; SEED Reaction: htt…
	r0786	L-methionine:tRNAMet ligase (AMP-forming)	atp[c] + l-methionine[c] + transfer rna[c] => amp[c] + diphosphate[c] + l-methionyl-trna(met)[c]	6.1.1.10	CCM_07913	0	1000			kegg.reaction/R03659	Aminoacyl tRNA biosynthesis		Aminoacyl tRNA biosynthesis		2	METTRS	EC Number: http://identifiers.org/ec-code/6.1.1.10; MetaNetX (MNX) Equation: http://identifiers.org/metanetx.reaction/MNXR101488; KEGG Reaction: http://identifiers.org/kegg.reaction/R03659; SEED Reaction: http://identifiers.org/seed.reaction/rxn06443
	r0787	L-methionine:tRNAMet ligase (AMP-forming)	atp[m] + l-methionine[m] + transfer rna[m] => amp[m] + diphosphate[m] + l-methionyl-trna(met)[m]	6.1.1.10	CCM_07913	0	1000			kegg.reaction/R03659	Aminoacyl tRNA biosynthesis		Aminoacyl tRNA biosynthesis		2	METTRS	EC Number: http://identifiers.org/ec-code/6.1.1.10; MetaNetX (MNX) Equation: http://identifiers.org/metanetx.reaction/MNXR101488; KEGG Reaction: http://identifiers.org/kegg.reaction/R03659; SEED Reaction: http://identifiers.org/seed.reaction/rxn06443
	r0788	L-tyrosine:tRNA(Tyr) ligase (AMP-forming)	atp[c] + l-tyrosine[c] + transfer rna[c] => amp[c] + diphosphate[c] + l-tyrosyl-trna(tyr)[c]	6.1.1.1	CCM_04882	0	1000			kegg.reaction/R02918	Aminoacyl tRNA biosynthesis		Aminoacyl tRNA biosynthesis		2	TYRTRSm	EC Number: http://identifiers.org/ec-code/6.1.1.1; MetaNetX (MNX) Equation: http://identifiers.org/metanetx.reaction/MNXR105001; Reactome Reaction: http://identifiers.org/reactome/R-HSA-379980; Reactome Reaction: http://identifiers.org/reactome/R-HSA-380170; KEGG Reaction: http://identifiers.org/kegg.reaction/R02918; SEED Reaction: http://identifiers.org/seed.reaction/rxn06280
	r0789	L-tyrosine:tRNA(Tyr) ligase (AMP-forming)	atp[m] + l-tyrosine[m] + transfer rna[m] => amp[m] + diphosphate[m] + l-tyrosyl-trna(tyr)[m]	6.1.1.1	CCM_00100	0	1000			kegg.reaction/R02918	Aminoacyl tRNA biosynthesis		Aminoacyl tRNA biosynthesis		2	TYRTRSm	EC Number: http://identifiers.org/ec-code/6.1.1.1; MetaNetX (MNX) Equation: http://identifiers.org/metanetx.reaction/MNXR105001; Reactome Reaction: http://identifiers.org/reactome/R-HSA-379980; Reactome Reaction: http://identifiers.org/reactome/R-HSA-380170; KEGG Reaction: http://identifiers.org/kegg.reaction/R02918; SEED Reaction: http://identifiers.org/seed.reaction/rxn06280
	r0790	L-tryptophan -tRNA(Trp) ligase (AMP-forming)	atp[c] + l-tryptophan[c] + transfer rna[c] => amp[c] + diphosphate[c] + l-tryptophanyl-trna(trp)[c]	6.1.1.2	CCM_05857	0	1000			kegg.reaction/R03664	Aminoacyl tRNA biosynthesis		Aminoacyl tRNA biosynthesis		2	TRPTRS	EC Number: http://identifiers.org/ec-code/6.1.1.2; MetaNetX (MNX) Equation: http://identifiers.org/metanetx.reaction/MNXR104948; Reactome Reaction: http://identifiers.org/reactome/R-HSA-379977; Reactome Reaction: http://identifiers.org/reactome/R-HSA-380222; KEGG Reaction: http://identifiers.org/kegg.reaction/R03664; SEED Reaction: http://identifiers.org/seed.reaction/rxn06448
	r0791	L-phenylalanine:tRNA(Ala) ligase (AMP-forming)	atp[c] + l-phenylalanine[c] + transfer rna[c] => amp[c] + diphosphate[c] + l-phenylalanyl-trna(phe)[c]	6.1.1.20	(CCM_04421 and CCM_06198) or CCM_07403	0	1000			kegg.reaction/R03660	Aminoacyl tRNA biosynthesis		Aminoacyl tRNA biosynthesis		2	PHETRS	EC Number: http://identifiers.org/ec-code/6.1.1.20; MetaNetX (MNX) Equation: http://identifiers.org/metanetx.reaction/MNXR102634; Reactome Reaction: http://identifiers.org/reactome/R-HSA-379848; Reactome Reaction: http://identifiers.org/reactome/R-HSA-380203; KEGG Reaction: http://identifiers.org/kegg.reaction/R03660; SEED Reaction: http://identifiers.org/seed.reaction/rxn06444
	r0792	L-tryptophan:tRNA(Trp) ligase (AMP-forming)	atp[m] + l-tryptophan[m] + transfer rna[m] => amp[m] + diphosphate[m] + l-tryptophanyl-trna(trp)[m]	6.1.1.2	CCM_05821	0	1000			kegg.reaction/R03664	Aminoacyl tRNA biosynthesis		Aminoacyl tRNA biosynthesis		2	TRPTRS	EC Number: http://identifiers.org/ec-code/6.1.1.2; MetaNetX (MNX) Equation: http://identifiers.org/metanetx.reaction/MNXR104948; Reactome Reaction: http://identifiers.org/reactome/R-HSA-379977; Reactome Reaction: http://identifiers.org/reactome/R-HSA-380222; KEGG Reaction: http://identifiers.org/kegg.reaction/R03664; SEED Reaction: http://identifiers.org/seed.reaction/rxn06448
	r0793	L-glutamate:L-cysteine gamma-ligase (ADP-forming)	atp[c] + l-cysteine[c] + l-glutamate[c] => adp[c] + gamma-l-glutamyl-l-cysteine[c] + phosphate[c]	6.3.2.2;6.3.2.2	CCM_00539 or CCM_08133	0	1000			kegg.reaction/R00894	Glutathione biosynthesis		Glutathione biosynthesis		2	GLUCYS	RHEA: http://identifiers.org/rhea/13285; RHEA: http://identifiers.org/rhea/13286; RHEA: http://identifiers.org/rhea/13287; RHEA: http://identifiers.org/rhea/13288; EC Number: http://identifiers.org/ec-code/6.3.2.2; BioCyc: http://identifiers.org/biocyc/META:GLUTCYSLIG-RXN; MetaNetX (MNX) Equation: http://identifiers.org/metanetx.reaction/MNXR100074; Reactome Reaction: http://identifiers.org/react…
	r0794	gamma-L-glutamyl-L-cysteine:glycine ligase (ADP-forming)	atp[c] + gamma-l-glutamyl-l-cysteine[c] + glycine[c] => adp[c] + glutathione[c] + phosphate[c]	6.3.2.3;6.3.2.3	CCM_01501	0	1000			kegg.reaction/R00497	Glutathione biosynthesis		Glutathione biosynthesis		2	GTHS	RHEA: http://identifiers.org/rhea/13557; RHEA: http://identifiers.org/rhea/13558; RHEA: http://identifiers.org/rhea/13559; RHEA: http://identifiers.org/rhea/13560; EC Number: http://identifiers.org/ec-code/6.3.2.3; BioCyc: http://identifiers.org/biocyc/META:GLUTATHIONE-SYN-RXN; MetaNetX (MNX) Equation: http://identifiers.org/metanetx.reaction/MNXR100450; Reactome Reaction: http://identifiers.org/…
	r0795	gamma-glutamyltranspeptidase	glutathione[c] + h2o[c] => l-cysteinylglycine[c] + l-glutamate[c]	2.3.2.2;3.4.19.13	CCM_02065 or CCM_02473 or CCM_05577 or CCM_05722 or CCM_09583	0	1000			kegg.reaction/R00494	Glutathione biosynthesis		Glutathione biosynthesis		2	GTHRDH_syn	RHEA: http://identifiers.org/rhea/28807; RHEA: http://identifiers.org/rhea/28808; RHEA: http://identifiers.org/rhea/28809; RHEA: http://identifiers.org/rhea/28810; EC Number: http://identifiers.org/ec-code/3.4.19; EC Number: http://identifiers.org/ec-code/3.4.19.13; BioCyc: http://identifiers.org/biocyc/META:RXN-12618; BioCyc: http://identifiers.org/biocyc/META:RXN-15856; MetaNetX (MNX) Equation:…
	r0796	5-oxo-L-proline amidohydrolase (ATP-hydrolysing)	5-oxo-l-proline[c] + atp[c] + 2 h2o[c] => adp[c] + l-glutamate[c] + phosphate[c]	3.5.2.9;3.5.2.9	CCM_05361 or CCM_07164	0	1000			kegg.reaction/R00251	Glutathione biosynthesis		Glutathione biosynthesis		2	OPAH	RHEA: http://identifiers.org/rhea/10348; RHEA: http://identifiers.org/rhea/10349; RHEA: http://identifiers.org/rhea/10350; RHEA: http://identifiers.org/rhea/10351; EC Number: http://identifiers.org/ec-code/3.5.2.9; BioCyc: http://identifiers.org/biocyc/META:5-OXOPROLINASE-ATP-HYDROLYSING-RXN; MetaNetX (MNX) Equation: http://identifiers.org/metanetx.reaction/MNXR138674; Reactome Reaction: http://i…
	r0797	glutathione:NADP+ oxidoreductase	nadph[c] + oxidized glutathione[c] => 2 glutathione[c] + nadp(+)[c]	1.8.1.7;1.8.1.7	CCM_09201	0	1000			kegg.reaction/R00115	Glutathione biosynthesis		Glutathione biosynthesis		2	GTHOr	EC Number: http://identifiers.org/ec-code/1.8.1.7; RHEA: http://identifiers.org/rhea/11740; RHEA: http://identifiers.org/rhea/11741; RHEA: http://identifiers.org/rhea/11742; RHEA: http://identifiers.org/rhea/11743; BioCyc: http://identifiers.org/biocyc/META:GLUTATHIONE-REDUCT-NADPH-RXN; MetaNetX (MNX) Equation: http://identifiers.org/metanetx.reaction/MNXR100098; Reactome Reaction: http://identif…
	r0798	L-cysteinylglycine dipeptidase	h2o[c] + l-cysteinylglycine[c] => glycine[c] + l-cysteine[c]	3.4.11.1;3.4.11.2;3.4.11.1;3.4.11.2;3.4.11.23;3.4.13.-	CCM_01450 or CCM_01571 or CCM_01695 or CCM_05545 or CCM_05888	0	1000			kegg.reaction/R00899	Glutathione biosynthesis		Glutathione biosynthesis		2	AMPTASECGe	RHEA: http://identifiers.org/rhea/28783; RHEA: http://identifiers.org/rhea/28784; RHEA: http://identifiers.org/rhea/28785; RHEA: http://identifiers.org/rhea/28786; EC Number: http://identifiers.org/ec-code/3.4.11.1; EC Number: http://identifiers.org/ec-code/3.4.11.2; EC Number: http://identifiers.org/ec-code/3.4.11.23; EC Number: http://identifiers.org/ec-code/3.4.13.-; EC Number: http://identifi…
	r0799	glutathione:hydrogen-peroxide oxidoreductase	2 glutathione[c] + h2o2[c] => 2 h2o[c] + oxidized glutathione[c]	1.11.1.9;1.11.1.9	CCM_03086	0	1000			kegg.reaction/R00274	Glutathione biosynthesis		Glutathione biosynthesis		2	GTHPe	EC Number: http://identifiers.org/ec-code/1.11.1.9; RHEA: http://identifiers.org/rhea/16833; RHEA: http://identifiers.org/rhea/16834; RHEA: http://identifiers.org/rhea/16835; RHEA: http://identifiers.org/rhea/16836; BioCyc: http://identifiers.org/biocyc/META:GLUTATHIONE-PEROXIDASE-RXN; MetaNetX (MNX) Equation: http://identifiers.org/metanetx.reaction/MNXR100446; Reactome Reaction: http://identifi…
	r0808	2-hydroxyphenylacetate:CoA ligase	2-hydroxyphenylacetate[p] + atp[p] + coenzyme a[p] => 2-hydroxyphenylacetyl-coa[p] + amp[p] + diphosphate[p]	6.2.1.30	CCM_06033	0	1000				Penicillin and cephalosporin biosynthesis		Penicillin and cephalosporin biosynthesis		2	PACCOAL	RHEA: http://identifiers.org/rhea/20956; RHEA: http://identifiers.org/rhea/20957; RHEA: http://identifiers.org/rhea/20958; RHEA: http://identifiers.org/rhea/20959; EC Number: http://identifiers.org/ec-code/6.2.1.30; BioCyc: http://identifiers.org/biocyc/META:RXN-10819; MetaNetX (MNX) Equation: http://identifiers.org/metanetx.reaction/MNXR102315; Reactome Reaction: http://identifiers.org/reactome/…
	r0821	butanoyl-CoA:oxygen 2-oxidoreductase	crotonoyl-coa[m] + fadh2[m] => butyryl-coa[m] + fad[m]	1.3.99.2	CCM_00006	0	1000			kegg.reaction/R01175	Fatty acid biosynthesis		Fatty acid biosynthesis		2	ACOA40OR	EC Number: http://identifiers.org/ec-code/1.3.3.6; EC Number: http://identifiers.org/ec-code/1.3.8.1; EC Number: http://identifiers.org/ec-code/1.3.8.7; EC Number: http://identifiers.org/ec-code/1.3.99.-; EC Number: http://identifiers.org/ec-code/1.3.99.3; RHEA: http://identifiers.org/rhea/24004; RHEA: http://identifiers.org/rhea/24005; RHEA: http://identifiers.org/rhea/24006; RHEA: http://identi…
	r0822	biotin-carboxyl-carrier-protein:carbon-dioxide ligase (ADP-forming)	atp[c] + co2[c] + h2o[c] + holo-[carboxylase][c] => adp[c] + carboxybiotin-carboxyl-carrier protein[c] + phosphate[c]	6.3.4.14	CCM_09369	0	1000			kegg.reaction/R04385	Fatty acid biosynthesis		Fatty acid biosynthesis		2	BTNC	EC Number: http://identifiers.org/ec-code/6.3.4.14; EC Number: http://identifiers.org/ec-code/6.4.1.1; MetaNetX (MNX) Equation: http://identifiers.org/metanetx.reaction/MNXR96330; KEGG Reaction: http://identifiers.org/kegg.reaction/R04385; SEED Reaction: http://identifiers.org/seed.reaction/rxn06672
	r0823	stearoyl-CoA 9-desaturase	nadh[c] + o2[c] + stearoyl-[acp][c] => 2 h2o[c] + nad(+)[c] + octadecenoyl-[acp][c]	1.14.19.1	CCM_02537	0	1000				Fatty acid biosynthesis		Fatty acid biosynthesis		2	DESAT16	EC Number: http://identifiers.org/ec-code/1.14.19.1; MetaNetX (MNX) Equation: http://identifiers.org/metanetx.reaction/MNXR97238
	r0824	stearoyl-CoA 9-desaturase	heptadecanoyl-[acp][c] + nadh[c] + o2[c] => 2 h2o[c] + heptadecenoyl-[acp][c] + nad(+)[c]	1.14.19.1	CCM_02537	0	1000				Fatty acid biosynthesis		Fatty acid biosynthesis		2	DESAT16	EC Number: http://identifiers.org/ec-code/1.14.19.1; MetaNetX (MNX) Equation: http://identifiers.org/metanetx.reaction/MNXR97238
	r0825	oleate delta-12 desaturase	nadh[c] + o2[c] + octadecenoyl-[acp][c] => 2 h2o[c] + nad(+)[c] + linoleoyl-[acp][c]	1.14.19.3	CCM_06866 or CCM_09560	0	1000				Fatty acid biosynthesis		Fatty acid biosynthesis		2
	r0826	stearoyl-CoA 9-desaturase	nadh[c] + o2[c] + palmitoyl-[acp][c] => 2 h2o[c] + hexadecenoyl-[acp][c] + nad(+)[c]	1.14.19.1	CCM_02537	0	1000				Fatty acid biosynthesis		Fatty acid biosynthesis		2	DESAT16	EC Number: http://identifiers.org/ec-code/1.14.19.1; MetaNetX (MNX) Equation: http://identifiers.org/metanetx.reaction/MNXR97238
	r0827	oleate delta-12 desaturase	hexadecenoyl-[acp][c] + nadh[c] + o2[c] => 2 h2o[c] + hexadecadienoyl-[acp][c] + nad(+)[c]	1.14.19.3	CCM_06866 or CCM_09560	0	1000				Fatty acid biosynthesis		Fatty acid biosynthesis		2
	r0828	stearoyl-CoA 15-desaturase	nadh[c] + o2[c] + linoleoyl-[acp][c] => 2 h2o[c] + nad(+)[c] + octadecadienoyl-[acp][c]	1.14.19.-	CCM_06866 or CCM_09560	0	1000				Fatty acid biosynthesis		Fatty acid biosynthesis		2
	r0829	3-oxoacyl-[acyl-carrier-protein] synthase	butyryl-[acp][c] + malonyl-[acp][c] => 3-oxohexanoyl-[acp][c] + acyl-carrier protein[c] + co2[c]	2.3.1.41	CCM_00603 or CCM_02998 or CCM_01811 or CCM_01518 or CCM_09346	0	1000				Fatty acid elongation		Fatty acid elongation		2	3OAS161	EC Number: http://identifiers.org/ec-code/2.3.1.41; MetaNetX (MNX) Equation: http://identifiers.org/metanetx.reaction/MNXR94960
	r0830	3-oxoacyl-[acyl-carrier-protein] reductase	3-hydroxyhexanoyl-[acp][c] + nadp(+)[c] <=> 3-oxohexanoyl-[acp][c] + nadph[c]	1.1.1.100	CCM_00221 or CCM_01693 or CCM_02998 or CCM_05145 or CCM_01664 or CCM_01815 or CCM_01926 or CCM_01950 or CCM_03111 or CCM_03400 or CCM_03982 or CCM_04911 or CCM_05642 or CCM_05671	-1000	1000				Fatty acid elongation		Fatty acid elongation		2	3OAR121	EC Number: http://identifiers.org/ec-code/1.1.1.100; MetaNetX (MNX) Equation: http://identifiers.org/metanetx.reaction/MNXR94943; SEED Reaction: http://identifiers.org/seed.reaction/rxn07987
	r0831	3-hydroxypalmitoyl-[acyl-carrier-protein] dehydratase	3-hydroxyhexanoyl-[acp][c] <=> h2o[c] + trans-hex-2-enoyl-[acp][c]	4.2.1.61	CCM_02997	-1000	1000				Fatty acid elongation		Fatty acid elongation		2	3HAD121	EC Number: http://identifiers.org/ec-code/4.2.1.61; MetaNetX (MNX) Equation: http://identifiers.org/metanetx.reaction/MNXR94878; SEED Reaction: http://identifiers.org/seed.reaction/rxn07976
	r0832	enoyl-ACP reductase	hexanoyl-[acp][c] + nadp(+)[c] <=> nadph[c] + trans-hex-2-enoyl-[acp][c]	1.3.1.9	CCM_08645	-1000	1000				Fatty acid elongation		Fatty acid elongation		2	EAR141x	EC Number: http://identifiers.org/ec-code/1.3.1.9; MetaNetX (MNX) Equation: http://identifiers.org/metanetx.reaction/MNXR97853
	r0833	acetyl-CoA:carbon-dioxide ligase (ADP-forming)	acetyl-coa[c] + carboxybiotin-carboxyl-carrier protein[c] <=> holo-[carboxylase][c] + malonyl-coa[c]	6.4.1.2	CCM_09369	-1000	1000			kegg.reaction/R04386	Fatty acid elongation		Fatty acid elongation		2	ACCOAC_1	EC Number: http://identifiers.org/ec-code/6.4.1.2; MetaNetX (MNX) Equation: http://identifiers.org/metanetx.reaction/MNXR95220; KEGG Reaction: http://identifiers.org/kegg.reaction/R04386; SEED Reaction: http://identifiers.org/seed.reaction/rxn06673
	r0834	3-oxoacyl-[acyl-carrier-protein] synthase	hexanoyl-[acp][c] + malonyl-[acp][c] => 3-oxooctanoyl-[acp][c] + acyl-carrier protein[c] + co2[c]	2.3.1.41	CCM_02998 or CCM_01811 or CCM_00603 or CCM_01518 or CCM_09346	0	1000				Fatty acid elongation		Fatty acid elongation		2	3OAS161	EC Number: http://identifiers.org/ec-code/2.3.1.41; MetaNetX (MNX) Equation: http://identifiers.org/metanetx.reaction/MNXR94960
	r0835	3-oxoacyl-[acyl-carrier-protein] reductase	3-hydroxyoctanoyl-[acp][c] + nadp(+)[c] <=> 3-oxooctanoyl-[acp][c] + nadph[c]	1.1.1.100	CCM_00221 or CCM_01693 or CCM_02998 or CCM_01693 or CCM_05145 or CCM_00221 or CCM_01664 or CCM_01815 or CCM_01926 or CCM_01950 or CCM_03111 or CCM_03400 or CCM_03982 or CCM_04911 or CCM_05642 or CCM_05671	-1000	1000				Fatty acid elongation		Fatty acid elongation		2	3OAR121	EC Number: http://identifiers.org/ec-code/1.1.1.100; MetaNetX (MNX) Equation: http://identifiers.org/metanetx.reaction/MNXR94943; SEED Reaction: http://identifiers.org/seed.reaction/rxn07987
	r0836	3-hydroxypalmitoyl-[acyl-carrier-protein] dehydratase	3-hydroxyoctanoyl-[acp][c] <=> h2o[c] + trans-oct-2-enoyl-[acp][c]	4.2.1.61	CCM_02997	-1000	1000				Fatty acid elongation		Fatty acid elongation		2	3HAD121	EC Number: http://identifiers.org/ec-code/4.2.1.61; MetaNetX (MNX) Equation: http://identifiers.org/metanetx.reaction/MNXR94878; SEED Reaction: http://identifiers.org/seed.reaction/rxn07976
	r0837	enoyl-ACP reductase	nadp(+)[c] + octanoyl-[acp][c] <=> nadph[c] + trans-oct-2-enoyl-[acp][c]	1.3.1.9	CCM_08645	-1000	1000				Fatty acid elongation		Fatty acid elongation		2	EAR141x	EC Number: http://identifiers.org/ec-code/1.3.1.9; MetaNetX (MNX) Equation: http://identifiers.org/metanetx.reaction/MNXR97853
	r0838	3-oxoacyl-[acyl-carrier-protein] synthase	malonyl-[acp][c] + octanoyl-[acp][c] => 3-oxodecanoyl-[acp][c] + acyl-carrier protein[c] + co2[c]	2.3.1.41	CCM_00603 or CCM_02998 or CCM_02998 or CCM_01811 or CCM_00603 or CCM_01518 or CCM_01811 or CCM_09346	0	1000				Fatty acid elongation		Fatty acid elongation		2	3OAS161	EC Number: http://identifiers.org/ec-code/2.3.1.41; MetaNetX (MNX) Equation: http://identifiers.org/metanetx.reaction/MNXR94960
	r0839	3-oxoacyl-[acyl-carrier-protein] reductase	3-hydroxydecanoyl-[acp][c] + nadp(+)[c] <=> 3-oxodecanoyl-[acp][c] + nadph[c]	1.1.1.100	CCM_00221 or CCM_01693 or CCM_02998 or CCM_01693 or CCM_05145 or CCM_00221 or CCM_01664 or CCM_01815 or CCM_01926 or CCM_01950 or CCM_03111 or CCM_03400 or CCM_03982 or CCM_04911 or CCM_05642 or CCM_05671	-1000	1000				Fatty acid elongation		Fatty acid elongation		2	3OAR121	EC Number: http://identifiers.org/ec-code/1.1.1.100; MetaNetX (MNX) Equation: http://identifiers.org/metanetx.reaction/MNXR94943; SEED Reaction: http://identifiers.org/seed.reaction/rxn07987
	r0840	3-hydroxypalmitoyl-[acyl-carrier-protein] dehydratase	3-hydroxydecanoyl-[acp][c] <=> h2o[c] + trans-dec-2-enoyl-[acp][c]	4.2.1.61	CCM_02997	-1000	1000				Fatty acid elongation		Fatty acid elongation		2	3HAD121	EC Number: http://identifiers.org/ec-code/4.2.1.61; MetaNetX (MNX) Equation: http://identifiers.org/metanetx.reaction/MNXR94878; SEED Reaction: http://identifiers.org/seed.reaction/rxn07976
	r0841	enoyl-ACP reductase	decanoyl-[acp][c] + nadp(+)[c] <=> nadph[c] + trans-dec-2-enoyl-[acp][c]	1.3.1.9	CCM_08645	-1000	1000				Fatty acid elongation		Fatty acid elongation		2	EAR141x	EC Number: http://identifiers.org/ec-code/1.3.1.9; MetaNetX (MNX) Equation: http://identifiers.org/metanetx.reaction/MNXR97853
	r0842	3-oxoacyl-[acyl-carrier-protein] synthase	acetyl-[acp][c] + malonyl-[acp][c] => acetoacetyl-[acp][c] + acyl-carrier protein[c] + co2[c]	2.3.1.41	CCM_00603 or CCM_02998 or CCM_02998 or CCM_01811 or CCM_00603 or CCM_01518 or CCM_01811 or CCM_09346	0	1000				Fatty acid elongation		Fatty acid elongation		2	3OAS161	EC Number: http://identifiers.org/ec-code/2.3.1.41; MetaNetX (MNX) Equation: http://identifiers.org/metanetx.reaction/MNXR94960
	r0843	3-oxoacyl-[acyl-carrier-protein] synthase	decanoyl-[acp][c] + malonyl-[acp][c] => 3-oxolauroyl-[acp][c] + acyl-carrier protein[c] + co2[c]	2.3.1.41	CCM_00603 or CCM_02998 or CCM_02998 or CCM_01811 or CCM_00603 or CCM_01518 or CCM_01811 or CCM_09346	0	1000				Fatty acid elongation		Fatty acid elongation		2	3OAS161	EC Number: http://identifiers.org/ec-code/2.3.1.41; MetaNetX (MNX) Equation: http://identifiers.org/metanetx.reaction/MNXR94960
	r0844	3-oxoacyl-[acyl-carrier-protein] reductase	3-hydroxylauroyl-[acp][c] + nadp(+)[c] <=> 3-oxolauroyl-[acp][c] + nadph[c]	1.1.1.100	CCM_00221 or CCM_01693 or CCM_02998 or CCM_01693 or CCM_05145 or CCM_00221 or CCM_01664 or CCM_01815 or CCM_01926 or CCM_01950 or CCM_03111 or CCM_03400 or CCM_03982 or CCM_04911 or CCM_05642 or CCM_05671	-1000	1000				Fatty acid elongation		Fatty acid elongation		2	3OAR121	EC Number: http://identifiers.org/ec-code/1.1.1.100; MetaNetX (MNX) Equation: http://identifiers.org/metanetx.reaction/MNXR94943; SEED Reaction: http://identifiers.org/seed.reaction/rxn07987
	r0845	3-hydroxypalmitoyl-[acyl-carrier-protein] dehydratase	3-hydroxylauroyl-[acp][c] <=> h2o[c] + trans-dodec-2-enoyl-[acp][c]	4.2.1.61	CCM_02997	-1000	1000				Fatty acid elongation		Fatty acid elongation		2	3HAD121	EC Number: http://identifiers.org/ec-code/4.2.1.61; MetaNetX (MNX) Equation: http://identifiers.org/metanetx.reaction/MNXR94878; SEED Reaction: http://identifiers.org/seed.reaction/rxn07976
	r0846	enoyl-ACP reductase	lauroyl-[acp][c] + nadp(+)[c] <=> nadph[c] + trans-dodec-2-enoyl-[acp][c]	1.3.1.9	CCM_08645	-1000	1000				Fatty acid elongation		Fatty acid elongation		2	EAR141x	EC Number: http://identifiers.org/ec-code/1.3.1.9; MetaNetX (MNX) Equation: http://identifiers.org/metanetx.reaction/MNXR97853
	r0847	3-oxoacyl-[acyl-carrier-protein] reductase	3-hydroxybutyryl-[acp][c] + nadp(+)[c] <=> acetoacetyl-[acp][c] + nadph[c]	1.1.1.100	CCM_00221 or CCM_01693 or CCM_02998 or CCM_01693 or CCM_05145 or CCM_00221 or CCM_01664 or CCM_01815 or CCM_01926 or CCM_01950 or CCM_03111 or CCM_03400 or CCM_03982 or CCM_04911 or CCM_05642 or CCM_05671	-1000	1000				Fatty acid elongation		Fatty acid elongation		2	3OAR121	EC Number: http://identifiers.org/ec-code/1.1.1.100; MetaNetX (MNX) Equation: http://identifiers.org/metanetx.reaction/MNXR94943; SEED Reaction: http://identifiers.org/seed.reaction/rxn07987
	r0848	3-oxoacyl-[acyl-carrier-protein] synthase	lauroyl-[acp][c] + malonyl-[acp][c] => 3-oxomyristoyl-[acp][c] + acyl-carrier protein[c] + co2[c]	2.3.1.41	CCM_00603 or CCM_02998 or CCM_02998 or CCM_01811 or CCM_00603 or CCM_01518 or CCM_01811 or CCM_09346	0	1000				Fatty acid elongation		Fatty acid elongation		2	3OAS161	EC Number: http://identifiers.org/ec-code/2.3.1.41; MetaNetX (MNX) Equation: http://identifiers.org/metanetx.reaction/MNXR94960
	r0849	3-oxoacyl-[acyl-carrier-protein] reductase	3-hydroxymyristoyl-[acp][c] + nadp(+)[c] <=> 3-oxomyristoyl-[acp][c] + nadph[c]	1.1.1.100	CCM_00221 or CCM_01693 or CCM_02998 or CCM_01693 or CCM_05145 or CCM_00221 or CCM_01664 or CCM_01815 or CCM_01926 or CCM_01950 or CCM_03111 or CCM_03400 or CCM_03982 or CCM_04911 or CCM_05642 or CCM_05671	-1000	1000				Fatty acid elongation		Fatty acid elongation		2	3OAR121	EC Number: http://identifiers.org/ec-code/1.1.1.100; MetaNetX (MNX) Equation: http://identifiers.org/metanetx.reaction/MNXR94943; SEED Reaction: http://identifiers.org/seed.reaction/rxn07987
	r0850	3-hydroxypalmitoyl-[acyl-carrier-protein] dehydratase	3-hydroxymyristoyl-[acp][c] <=> h2o[c] + trans-tetradec-2-enoyl-[acp][c]	4.2.1.61	CCM_02997	-1000	1000				Fatty acid elongation		Fatty acid elongation		2	3HAD121	EC Number: http://identifiers.org/ec-code/4.2.1.61; MetaNetX (MNX) Equation: http://identifiers.org/metanetx.reaction/MNXR94878; SEED Reaction: http://identifiers.org/seed.reaction/rxn07976
	r0851	enoyl-ACP reductase	myristoyl-[acp][c] + nadp(+)[c] <=> nadph[c] + trans-tetradec-2-enoyl-[acp][c]	1.3.1.9	CCM_08645	-1000	1000				Fatty acid elongation		Fatty acid elongation		2	EAR141x	EC Number: http://identifiers.org/ec-code/1.3.1.9; MetaNetX (MNX) Equation: http://identifiers.org/metanetx.reaction/MNXR97853
[truncated: 1,235 more rows]

## Sheet: Table S2
Supplementary Table S2. List of metabolites in the enhanced GSMM (iPC1469) of C. militaris.
[truncated: 1,684 more rows]

[truncated: 3 more sheets: Table S3, Table S4, MODEL]
