# Supplementary material for: Enhancing Genome-Scale Model by Integrative Exometabolome and Transcriptome: Unveiling Carbon Assimilation towards Sphingolipid Biosynthetic Capability of Cordyceps militaris
Source: J Fungi (Basel). 2022 Aug 22;8(8):887. doi: 10.3390/jof8080887 (PMC9409897; doi:10.3390/jof8080887)
Supplement: Supplementary file 1 [file jof-08-00887-s001.zip › Supplementary File S6.xlsx]

## Sheet: Index
Supplementary Information
Enhancing Genome-Scale Model by Integrative Exometabolome and Transcriptome: Unveiling Carbon Assimilation towards Sphingolipid Biosynthetic Capability of Cordyceps militaris
Pattsarun Cheawchanlertfa 1,†, Suwalak Chitcharoen 1,2,†, Nachon Raethong 3, Qing Liu 4, Pramote Chumnanpuen 1,5, Panyawarin Soommat 1,6, Yuanda Song 1,4, Mattheos Koffas 7, Kobkul Laoteng 8,*, Wanwipa Vongsangnak 1,5,*
1 Department of Zoology, Faculty of Science, Kasetsart University, Bangkok 10900, Thailand 2 Program in Bioinformatics and Computational Biology, Graduate School, Chulalongkorn University, Bangkok 10330, Thailand 3 Institute of Nutrition, Mahidol University, Nakhon Pathom 73170, Thailand 4 Colin Ratledge Center for Microbial Lipids, School of Agriculture Engineering and Food Sciences, Shandong Un…
Supplementary File S6: Transcriptomic data of C. militaris TBRC6039
This file includes Supplementary Tables S1
	Supplementary Table S1. Gene expression levels of C. militaris

## Sheet: Table S1
Supplementary Table S1. Gene expression levels of C. militaris
Gene_ID	Transcript_ID(s)	Glucose_FPKM	Sucrose_FPKM	Xylose_FPKM	Non-redundant protein database	Non-redundant nucleotide database	Swissprot	KEGG	COG	Interpro	GO
Unigene8115_All	Unigene8115_All	19747.3	17320	20931.3	gi|573992235|ref|XP_006674038.1|/3.02009e-30/hypothetical protein CCM_08839 [Cordyceps militaris CM01] &gt;gi|346319191|gb|EGX88793.1| hypothetical protein CCM_08839 [Cordyceps militaris CM01]	gi|379054846|gb|JQ358777.1|/8e-36/Cordyceps militaris clone YHCM-CM8-07 microsatellite sequence	sp|P84865|MT1_NECLU/4e-06/Metallothionein OS=Nectria lugdunensis PE=1 SV=1	NA	NA	NA	NA
Unigene4717_All	Unigene4717_All	14927.5	12334.6	9905.18	gi|573982245|ref|XP_006669043.1|/9.34374e-70/Ricin B-related lectin [Cordyceps militaris CM01] &gt;gi|346322861|gb|EGX92459.1| Ricin B-related lectin [Cordyceps militaris CM01]	gi|573982244|ref|XM_006668980.1|/0.0/Cordyceps militaris CM01 Ricin B-related lectin (CCM_03832), partial mRNA	sp|P47179|DAN4_YEAST/6e-13/Cell wall protein DAN4 OS=Saccharomyces cerevisiae (strain ATCC 204508 / S288c) GN=DAN4 PE=2 SV=1	ttt:THITE_2111816/2e-09/glycoside hydrolase family 18 protein; K01183 chitinase [EC:3.2.1.14]	NA	PS50231/11.31/Lectin domain of ricin B chain profile.	molecular_function:GO:0030246//carbohydrate binding;
CL412.Contig2_All	CL412.Contig2_All	5794.14	2980.8	256.29	gi|573993755|ref|XP_006674798.1|/8.89213e-85/hypothetical protein CCM_09602 [Cordyceps militaris CM01] &gt;gi|346318036|gb|EGX87641.1| hypothetical protein CCM_09602 [Cordyceps militaris CM01]	gi|573993754|ref|XM_006674735.1|/0.0/Cordyceps militaris CM01 hypothetical protein (CCM_09602), partial mRNA	sp|Q8TFG4|YL54_SCHPO/3e-06/Uncharacterized protein PB18E9.04c OS=Schizosaccharomyces pombe (strain 972 / ATCC 24843) GN=SPAPB18E9.04c PE=4 SV=1	ttt:THITE_2111816/9e-08/glycoside hydrolase family 18 protein; K01183 chitinase [EC:3.2.1.14]	NA	NA	NA
Unigene1044_All	Unigene1044_All	4838.11	5231.24	1209.57	gi|573987183|ref|XP_006671512.1|/1.27317e-44/hypothetical protein CCM_06308 [Cordyceps militaris CM01] &gt;gi|346322549|gb|EGX92148.1| hypothetical protein CCM_06308 [Cordyceps militaris CM01]	gi|573987182|ref|XM_006671449.1|/1e-133/Cordyceps militaris CM01 hypothetical protein (CCM_06308), partial mRNA	NA	NA	NA	NA	NA
Unigene5800_All	Unigene5800_All	4832.19	4291.37	1191.91	gi|573985701|ref|XP_006670771.1|/3.92019e-44/hypothetical protein CCM_05564 [Cordyceps militaris CM01] &gt;gi|346321807|gb|EGX91406.1| hypothetical protein CCM_05564 [Cordyceps militaris CM01]	gi|573985700|ref|XM_006670708.1|/1e-149/Cordyceps militaris CM01 hypothetical protein (CCM_05564), partial mRNA	sp|P16934|SC4_SCHCO/3e-06/Fruiting body protein SC4 OS=Schizophyllum commune GN=SC4 PE=2 SV=1	NA	NA	NA	NA
Unigene8154_All	Unigene8154_All	3922.8	4494.99	4662.12	gi|973788303|gb|KUM61769.1|/9.52285e-07/hypothetical protein ACN42_g5350 [Penicillium freii]	gi|410175981|gb|AC253866.1|/1e-23/Aspergillus niger clone AXAS185-F19, complete sequence	sp|Q75AH3|RL41_ASHGO/2e-07/60S ribosomal protein L41 OS=Ashbya gossypii (strain ATCC 10895 / CBS 109.51 / FGSC 9923 / NRRL Y-1056) GN=RPL41 PE=3 SV=1	cpw:CPC735_026280/2e-06/60S ribosomal protein L41; K02928 large subunit ribosomal protein L41e	NA	NA	NA
Unigene1681_All	Unigene1681_All	3323.18	2550.61	267.27	gi|700483373|gb|KGO69684.1|/8.94061e-124/hypothetical protein PITC_045440 [Penicillium italicum]	gi|667651340|ref|XM_008599280.1|/3e-19/Beauveria bassiana ARSEF 2860 fungal specific transcription factor partial mRNA	sp|Q9C105|YKT4_SCHPO/3e-07/Chitinase-like protein PB1E7.04c OS=Schizosaccharomyces pombe (strain 972 / ATCC 24843) GN=SPAPB1E7.04c PE=3 SV=1	ago:AGOS_AGL062C/1e-06/AGL062Cp; K11648 SWI/SNF-related matrix-associated actin-dependent regulator of chromatin subfamily B member 1	NA	NA	NA
Unigene4160_All	Unigene4160_All	3048.52	3119.53	2255.2	gi|573976172|ref|XP_006666031.1|/0/elongation factor 1-alpha [Cordyceps militaris CM01] &gt;gi|346326558|gb|EGX96154.1| elongation factor 1-alpha [Cordyceps militaris CM01]	gi|573976171|ref|XM_006665968.1|/0.0/Cordyceps militaris CM01 elongation factor 1-alpha (CCM_00809), partial mRNA	sp|Q01765|EF1A_PODCU/0.0/Elongation factor 1-alpha OS=Podospora curvicolla GN=TEF PE=3 SV=1	cmt:CCM_00809/0.0/elongation factor 1-alpha; K03231 elongation factor 1-alpha	YPR080w/0.0/---	NA	biological_process:GO:0006414//translational elongation;cellular_component:GO:0005737//cytoplasm;molecular_function:GO:0003746//translation elongation factor activity;GO:0005525//GTP binding;GO:0003924//GTPase activity;
CL2163.Contig3_All	CL2163.Contig3_All	2915.41	3343.01	2097.23	gi|949377967|emb|CUS24289.1|/7.04008e-22/LAQU0S15e01178g1_1 [Lachancea quebecensis]	NA	sp|Q05164|HPF1_YEAST/5e-07/Haze protective factor 1 OS=Saccharomyces cerevisiae (strain ATCC 204508 / S288c) GN=HPF1 PE=1 SV=2	NA	NA	NA	NA
Unigene3929_All	Unigene3929_All	2859.2	1893.4	1387.82	gi|573985135|ref|XP_006670488.1|/9.74017e-63/copper resistance protein Crd2 [Cordyceps militaris CM01] &gt;gi|346321524|gb|EGX91123.1| copper resistance protein Crd2 [Cordyceps militaris CM01]	gi|573985134|ref|XM_006670425.1|/0.0/Cordyceps militaris CM01 copper resistance protein Crd2 (CCM_05280), partial mRNA	NA	mbe:MBM_05980/1e-19/peroxisomal copper amine oxidase; K00276 primary-amine oxidase [EC:1.4.3.21]	NA	NA	NA
Unigene655_All	Unigene655_All	2777.55	2804.11	3114.31	gi|573982593|ref|XP_006669217.1|/0/cell wall glucanase [Cordyceps militaris CM01] &gt;gi|346323035|gb|EGX92633.1| cell wall glucanase [Cordyceps militaris CM01]	gi|573982592|ref|XM_006669154.1|/0.0/Cordyceps militaris CM01 cell wall glucanase (CCM_04006), partial mRNA	sp|Q8J0P4|CRF1_ASPFU/1e-72/Probable glycosidase crf1 OS=Neosartorya fumigata (strain ATCC MYA-4609 / Af293 / CBS 101355 / FGSC A1100) GN=crf1 PE=1 SV=2	lth:KLTH0G17886g/7e-23/KLTH0G17886p; K19475 WAS/WASL-interacting protein	YGR189c/2e-70/---	PF00722/6.9E-38/Glycosyl hydrolases family 16	biological_process:GO:0005975//carbohydrate metabolic process;GO:0071555//cell wall organization;cellular_component:GO:0005618//cell wall;molecular_function:GO:0004553//hydrolase activity, hydrolyzing O-glycosyl compounds;
CL412.Contig1_All	CL412.Contig1_All	2745.27	1389.23	125.06	gi|573993755|ref|XP_006674798.1|/2.42584e-84/hypothetical protein CCM_09602 [Cordyceps militaris CM01] &gt;gi|346318036|gb|EGX87641.1| hypothetical protein CCM_09602 [Cordyceps militaris CM01]	gi|573993754|ref|XM_006674735.1|/0.0/Cordyceps militaris CM01 hypothetical protein (CCM_09602), partial mRNA	sp|Q8TFG4|YL54_SCHPO/8e-06/Uncharacterized protein PB18E9.04c OS=Schizosaccharomyces pombe (strain 972 / ATCC 24843) GN=SPAPB18E9.04c PE=4 SV=1	ttt:THITE_2111816/8e-08/glycoside hydrolase family 18 protein; K01183 chitinase [EC:3.2.1.14]	NA	NA	NA
Unigene4811_All	Unigene4811_All	2715.91	3245.2	4883.94	gi|701772978|gb|KGQ07474.1|/1.09211e-120/hypothetical protein BBAD15_g7204 [Beauveria bassiana D1-5]	gi|212526813|ref|XM_002143528.1|/7e-07/Penicillium marneffei ATCC 18224 extracellular serine-threonine rich protein, mRNA	sp|P08640|MUC1_YEAST/9e-19/Flocculation protein FLO11 OS=Saccharomyces cerevisiae (strain ATCC 204508 / S288c) GN=MUC1 PE=1 SV=2	maw:MAC_04884/9e-25/chitinase 18-18; K01183 chitinase [EC:3.2.1.14]	XF0818/6e-11/---	NA	NA
Unigene2227_All	Unigene2227_All	2572.37	2352.92	1366.56	gi|573984185|ref|XP_006670013.1|/0/heat shock 70 kDa protein [Cordyceps militaris CM01] &gt;gi|346323832|gb|EGX93430.1| heat shock 70 kDa protein [Cordyceps militaris CM01]	gi|573984184|ref|XM_006669950.1|/0.0/Cordyceps militaris CM01 heat shock 70 kDa protein (CCM_04804), partial mRNA	sp|Q01233|HSP70_NEUCR/0.0/Heat shock 70 kDa protein OS=Neurospora crassa (strain ATCC 24698 / 74-OR23-1A / CBS 708.71 / DSM 1257 / FGSC 987) GN=hsps-1 PE=2 SV=2	cmt:CCM_04804/0.0/heat shock 70 kDa protein; K03283 heat shock 70kDa protein 1/8	SPAC13G7.02c/0.0/---	PF00012/3.1E-268/Hsp70 protein	molecular_function:GO:0005524//ATP binding;
Unigene8259_All	Unigene8259_All	2003.81	2488.25	1790.9	gi|573981471|ref|XP_006668656.1|/9.85553e-81/hypothetical protein CCM_03442 [Cordyceps militaris CM01] &gt;gi|346325573|gb|EGX95170.1| hypothetical protein CCM_03442 [Cordyceps militaris CM01]	gi|517316688|emb|HF679027.1|/3e-10/Fusarium fujikuroi IMI 58289 draft genome, chromosome FFUJ_chr05	sp|Q01302|CCG6_NEUCR/8e-21/Clock-controlled protein 6 OS=Neurospora crassa (strain ATCC 24698 / 74-OR23-1A / CBS 708.71 / DSM 1257 / FGSC 987) GN=ccg-6 PE=2 SV=2	wic:J056_004785/4e-14/Wiskott-Aldrich syndrome protein-like protein 1; K05747 Wiskott-Aldrich syndrome protein	slr0599/8e-10/---	NA	NA
CL2275.Contig4_All	CL2275.Contig4_All	1959.61	1864.07	1725.1	gi|813210578|dbj|GAO48882.1|/1.79041e-109/hypothetical protein G7K_3045-t1 [Saitoella complicata NRRL Y-17804]	gi|380446927|gb|JQ080063.1|/0.0/Hypocrea lixii clone pSG22 ubiquitin mRNA, partial cds	sp|P0CG63|UBI4P_YEAST/7e-110/Polyubiquitin OS=Saccharomyces cerevisiae (strain ATCC 204508 / S288c) GN=UBI4 PE=1 SV=1	lth:KLTH0E05852g/2e-109/KLTH0E05852p; K08770 ubiquitin C	YLL039c/2e-109/---	PTHR10666/1.3E-182/--	cellular_component:GO:0005737//cytoplasm;
Unigene2835_All	Unigene2835_All	1938.18	1690.51	1757.66	gi|573983377|ref|XP_006669609.1|/2.34741e-134/hypothetical protein CCM_04398 [Cordyceps militaris CM01] &gt;gi|346323428|gb|EGX93026.1| hypothetical protein CCM_04398 [Cordyceps militaris CM01]	gi|379054848|gb|JQ358779.1|/5e-93/Cordyceps militaris clone YHCM-CM15-03 microsatellite sequence	NA	NA	NA	NA	NA
Unigene8260_All	Unigene8260_All	1921.2	1361.25	1500.8	gi|573986633|ref|XP_006671237.1|/3.20465e-58/hypothetical protein CCM_06031 [Cordyceps militaris CM01] &gt;gi|346322274|gb|EGX91873.1| hypothetical protein CCM_06031 [Cordyceps militaris CM01]	gi|573986632|ref|XM_006671174.1|/0.0/Cordyceps militaris CM01 hypothetical protein (CCM_06031), partial mRNA	sp|Q5AZM3|SEC31_EMENI/8e-07/Protein transport protein sec31 OS=Emericella nidulans (strain FGSC A4 / ATCC 38163 / CBS 112.46 / NRRL 194 / M139) GN=sec31 PE=3 SV=2	pcs:Pc22g23920/9e-06/Pc22g23920; K05747 Wiskott-Aldrich syndrome protein	NA	NA	biological_process:GO:0008152//metabolic process;cellular_component:GO:0016021//integral component of membrane;molecular_function:GO:0016874//ligase activity;
Unigene7237_All	Unigene7237_All	1834.05	2128.2	1190.4	gi|573976296|ref|XP_006666093.1|/1.75237e-35/hypothetical protein CCM_00871 [Cordyceps militaris CM01] &gt;gi|346326620|gb|EGX96216.1| hypothetical protein CCM_00871 [Cordyceps militaris CM01]	gi|573976295|ref|XM_006666030.1|/1e-111/Cordyceps militaris CM01 hypothetical protein (CCM_00871), partial mRNA	NA	NA	NA	NA	NA
Unigene3802_All	Unigene3802_All	1816.81	1984.21	2686.69	gi|573989721|ref|XP_006672781.1|/4.42353e-60/peptidyl-prolyl cis-trans isomerase [Cordyceps militaris CM01] &gt;gi|346319725|gb|EGX89326.1| peptidyl-prolyl cis-trans isomerase [Cordyceps militaris CM01]	gi|573989720|ref|XM_006672718.1|/0.0/Cordyceps militaris CM01 peptidyl-prolyl cis-trans isomerase (CCM_07577), partial mRNA	sp|Q6M981|FKB1B_NEUCR/1e-41/FK506-binding protein 1B OS=Neurospora crassa (strain ATCC 24698 / 74-OR23-1A / CBS 708.71 / DSM 1257 / FGSC 987) GN=fkr-3 PE=3 SV=2	cmt:CCM_07577/5e-61/peptidyl-prolyl cis-trans isomerase; K09568 FK506-binding protein 1 [EC:5.2.1.8]	SPBC839.17c/3e-27/---	PTHR10516:SF254/6.8E-53/--	biological_process:GO:0006457//protein folding;GO:1901710//regulation of homoserine biosynthetic process;GO:0006325//chromatin organization;GO:0000413//protein peptidyl-prolyl isomerization;cellular_component:GO:0005634//nucleus;GO:0005739//mitochondrion;molecular_function:GO:0003755//peptidyl-prolyl cis-trans isomerase activity;GO:0005527//macrolide binding;
Unigene2410_All	Unigene2410_All	1701.81	2264.81	1414.09	gi|573983455|ref|XP_006669648.1|/0/phosphoribosyl-aminoimidazole-succinocarboxamide synthase [Cordyceps militaris CM01] &gt;gi|346323467|gb|EGX93065.1| phosphoribosyl-aminoimidazole-succinocarboxamide synthase [Cordyceps militaris CM01]	gi|573983454|ref|XM_006669585.1|/0.0/Cordyceps militaris CM01 phosphoribosyl-aminoimidazole-succinocarboxamide synthase (CCM_04437), partial mRNA	NA	NA	BS_ydhJ/8e-35/---	PF01966/9.0E-6/HD domain	biological_process:GO:0006203//dGTP catabolic process;cellular_component:GO:0005634//nucleus;molecular_function:GO:0008832//dGTPase activity;
Unigene1951_All	Unigene1951_All	1684.74	1516.87	1542.32	gi|573977990|ref|XP_006666940.1|/4.87654e-90/cyclophilin [Cordyceps militaris CM01] &gt;gi|346327467|gb|EGX97063.1| cyclophilin [Cordyceps militaris CM01]	gi|573977989|ref|XM_006666877.1|/0.0/Cordyceps militaris CM01 cyclophilin (CCM_01722), partial mRNA	sp|P0C1H7|PPIA1_RHIO9/6e-67/Peptidyl-prolyl cis-trans isomerase A1 OS=Rhizopus delemar (strain RA 99-880 / ATCC MYA-4621 / FGSC 9543 / NRRL 43880) GN=cyp2 PE=3 SV=1	cmt:CCM_01722/5e-91/cyclophilin; K09565 peptidyl-prolyl isomerase F (cyclophilin D) [EC:5.2.1.8]	SPBC28F2.03/7e-63/---	PR00153/9.2E-40/Cyclophilin peptidyl-prolyl cis-trans isomerase signature	biological_process:GO:0006457//protein folding;GO:0000413//protein peptidyl-prolyl isomerization;molecular_function:GO:0003755//peptidyl-prolyl cis-trans isomerase activity;
Unigene6557_All	Unigene6557_All	1606.98	1510.81	858.45	gi|573990243|ref|XP_006673042.1|/0/heat shock protein 90 [Cordyceps militaris CM01] &gt;gi|346319986|gb|EGX89587.1| heat shock protein 90 [Cordyceps militaris CM01]	gi|573990242|ref|XM_006672979.1|/0.0/Cordyceps militaris CM01 heat shock protein 90 (CCM_07839), partial mRNA	sp|O43109|HSP90_PODAS/0.0/Heat shock protein 90 homolog OS=Podospora anserina GN=MOD-E PE=3 SV=1	cmt:CCM_07839/0.0/heat shock protein 90; K04079 molecular chaperone HtpG	YMR186w/0.0/---	PR00775/4.7E-80/90kDa heat shock protein signature	biological_process:GO:0006457//protein folding;GO:0006950//response to stress;molecular_function:GO:0005524//ATP binding;GO:0051082//unfolded protein binding;
Unigene8464_All	Unigene8464_All	1541.17	1864.48	1028.6	gi|573981277|ref|XP_006668559.1|/0/woronin body major protein [Cordyceps militaris CM01] &gt;gi|346325476|gb|EGX95073.1| woronin body major protein [Cordyceps militaris CM01]	gi|573981276|ref|XM_006668496.1|/0.0/Cordyceps militaris CM01 woronin body major protein (CCM_03345), partial mRNA	sp|P87252|HEX1_NEUCR/2e-71/Woronin body major protein OS=Neurospora crassa (strain ATCC 24698 / 74-OR23-1A / CBS 708.71 / DSM 1257 / FGSC 987) GN=hex-1 PE=1 SV=1	ani:AN8241.2/1e-09/similar to chitinase; K01183 chitinase [EC:3.2.1.14]	YEL034w/3e-07/---	PTHR11673/1.7E-93/--	biological_process:GO:0045905//positive regulation of translational termination;GO:0009405//pathogenesis;GO:0045901//positive regulation of translational elongation;cellular_component:GO:0005576//extracellular region;molecular_function:GO:0043022//ribosome binding;GO:0003746//translation elongation factor activity;GO:0003824//catalytic activity;
Unigene5500_All	Unigene5500_All	1464.45	1780.07	1398.49	gi|573987181|ref|XP_006671511.1|/1.32187e-180/hypothetical protein CCM_06307 [Cordyceps militaris CM01] &gt;gi|346322548|gb|EGX92147.1| hypothetical protein CCM_06307 [Cordyceps militaris CM01]	gi|573987180|ref|XM_006671448.1|/0.0/Cordyceps militaris CM01 hypothetical protein (CCM_06307), partial mRNA	NA	NA	NA	PF11807/4.3E-41/Domain of unknown function (DUF3328)	cellular_component:GO:0016021//integral component of membrane;
Unigene2260_All	Unigene2260_All	1445.37	1746.6	2178.24	gi|573983995|ref|XP_006669918.1|/0/1,3-beta-glucanosyltransferase, putative [Cordyceps militaris CM01] &gt;gi|346323737|gb|EGX93335.1| 1,3-beta-glucanosyltransferase, putative [Cordyceps militaris CM01]	gi|667653294|ref|XM_008600257.1|/0.0/Beauveria bassiana ARSEF 2860 glycolipid anchored surface protein partial mRNA	sp|P0C956|GEL4_ASPFU/4e-126/1,3-beta-glucanosyltransferase gel4 OS=Neosartorya fumigata (strain ATCC MYA-4609 / Af293 / CBS 101355 / FGSC A1100) GN=gel4 PE=3 SV=1	sce:YIR019C/5e-20/FLO11, MUC1, STA4; Flo11p; K19851 flocculation protein FLO11	DR0479/8e-09/---	PF07983/3.2E-17/X8 domain	biological_process:GO:0005975//carbohydrate metabolic process;cellular_component:GO:0005886//plasma membrane;GO:0031225//anchored component of membrane;molecular_function:GO:0016740//transferase activity;
CL1629.Contig2_All	CL1629.Contig2_All	1439.05	876.07	819.42	gi|573990433|ref|XP_006673137.1|/0/pantothenate transporter, putative [Cordyceps militaris CM01] &gt;gi|346320081|gb|EGX89682.1| pantothenate transporter, putative [Cordyceps militaris CM01]	gi|667658606|ref|XM_008602913.1|/3e-52/Beauveria bassiana ARSEF 2860 major facilitator superfamily transporter partial mRNA	sp|O43000|LIZ1_SCHPO/3e-64/Pantothenate transporter liz1 OS=Schizosaccharomyces pombe (strain 972 / ATCC 24843) GN=liz1 PE=2 SV=2	shs:STEHIDRAFT_108639/4e-88/MFS general substrate transporter; K03448 MFS transporter, ACS family, pantothenate transporter	YAL067c/8e-48/---	PTHR11662:SF240/3.9E-125/--	biological_process:GO:0055085//transmembrane transport;cellular_component:GO:0016021//integral component of membrane;
Unigene5285_All	Unigene5285_All	1398.29	1414.62	1581.49	gi|701774619|gb|KGQ08846.1|/4.5403e-115/Nucleoside diphosphate kinase [Beauveria bassiana D1-5]	gi|667647016|ref|XM_008597118.1|/0.0/Beauveria bassiana ARSEF 2860 nucleoside diphosphate kinase partial mRNA	sp|Q7Z8P9|NDK_ASPFU/7e-74/Nucleoside diphosphate kinase OS=Neosartorya fumigata (strain ATCC MYA-4609 / Af293 / CBS 101355 / FGSC A1100) GN=ndk1 PE=3 SV=1	fgr:FGSG_05972/7e-79/nucleoside diphosphate kinase; K00940 nucleoside-diphosphate kinase [EC:2.7.4.6]	YKL067w/2e-54/---	PTHR11349:SF46/3.8E-108/--	biological_process:GO:0046132//pyrimidine ribonucleoside biosynthetic process;GO:0009209//pyrimidine ribonucleoside triphosphate biosynthetic process;GO:0009220//pyrimidine ribonucleotide biosynthetic process;cellular_component:GO:0016020//membrane;
CL1314.Contig1_All	CL1314.Contig1_All	1314.09	1284.06	1243	gi|573980150|ref|XP_006668020.1|/1.52651e-144/hypothetical protein CCM_02805 [Cordyceps militaris CM01] &gt;gi|346324937|gb|EGX94534.1| hypothetical protein CCM_02805 [Cordyceps militaris CM01]	gi|667644788|ref|XM_008596004.1|/2e-77/Beauveria bassiana ARSEF 2860 GPI anchored serine-rich protein partial mRNA	sp|O36027|WSP1_SCHPO/1e-21/Wiskott-Aldrich syndrome protein homolog 1 OS=Schizosaccharomyces pombe (strain 972 / ATCC 24843) GN=wsp1 PE=1 SV=3	ttt:THITE_2111816/8e-27/glycoside hydrolase family 18 protein; K01183 chitinase [EC:3.2.1.14]	Rv3876/4e-14/---	NA	cellular_component:GO:0016021//integral component of membrane;
Unigene8458_All	Unigene8458_All	1307.47	985.65	818	gi|667645719|ref|XP_008594691.1|/1.39671e-11/hypothetical protein BBA_01372 [Beauveria bassiana ARSEF 2860] &gt;gi|400601782|gb|EJP69407.1| hypothetical protein BBA_01372 [Beauveria bassiana ARSEF 2860] &gt;gi|701776946|gb|KGQ10736.1| hypothetical protein BBAD15_g3922 [Beauveria bassiana D1-5]	gi|699040812|emb|HG970332.1|/7e-06/Fusarium graminearum chromosome 1, complete genome	NA	NA	NA	NA	NA
Unigene187_All	Unigene187_All	1293.91	1303.85	1075.95	gi|573977742|ref|XP_006666816.1|/2.44266e-40/hypothetical protein CCM_01597 [Cordyceps militaris CM01] &gt;gi|346327343|gb|EGX96939.1| hypothetical protein CCM_01597 [Cordyceps militaris CM01]	gi|63021194|gb|AY951676.1|/3e-11/Biscogniauxia capnodes var. rumpens voucher YMJ 144 beta-tubulin gene, partial sequence	sp|Q7SAT8|PAN1_NEUCR/2e-16/Actin cytoskeleton-regulatory complex protein pan-1 OS=Neurospora crassa (strain ATCC 24698 / 74-OR23-1A / CBS 708.71 / DSM 1257 / FGSC 987) GN=pan-1 PE=3 SV=1	aor:AOR_1_236094/1e-16/AO090120000140; actin associated protein Wsp1; K05747 Wiskott-Aldrich syndrome protein	XF0818/5e-15/---	NA	biological_process:GO:0030036//actin cytoskeleton organization;cellular_component:GO:0044424//intracellular part;
Unigene2789_All	Unigene2789_All	1257.1	1414.49	1714.08	gi|573978430|ref|XP_006667160.1|/8.98803e-157/short-chain dehydrogenase, putative [Cordyceps militaris CM01] &gt;gi|346324077|gb|EGX93674.1| short-chain dehydrogenase, putative [Cordyceps militaris CM01]	gi|211583076|emb|AM920428.1|/1e-07/Penicillium chrysogenum Wisconsin 54-1255 complete genome, contig Pc00c13	sp|O74628|YQ53_SCHPO/1e-25/Uncharacterized oxidoreductase C162.03 OS=Schizosaccharomyces pombe (strain 972 / ATCC 24843) GN=SPCC162.03 PE=3 SV=1	pic:PICST_80053/2e-19/YIM4; NADP(+)-dependent dehydrogenase acts on serine, L-allo-threonine, and other 3-hydroxy acids (EC:1.1.1.56); K16066 3-hydroxy acid dehydrogenase / malonic semialdehyde reductase [EC:1.1.1.381 1.1.1.-]	PA1379/2e-32/---	PF00106/3.2E-25/short chain dehydrogenase	NA
Unigene7588_All	Unigene7588_All	1252.04	742.91	1174.1	gi|573980679|ref|XP_006668260.1|/0/formate dehydrogenase [Cordyceps militaris CM01] &gt;gi|346325177|gb|EGX94774.1| formate dehydrogenase [Cordyceps militaris CM01]	gi|573980678|ref|XM_006668197.1|/0.0/Cordyceps militaris CM01 formate dehydrogenase (CCM_03045), partial mRNA	sp|Q07103|FDH_NEUCR/0.0/Formate dehydrogenase OS=Neurospora crassa (strain ATCC 24698 / 74-OR23-1A / CBS 708.71 / DSM 1257 / FGSC 987) GN=fdh PE=2 SV=1	cmt:CCM_03045/0.0/formate dehydrogenase; K00122 formate dehydrogenase [EC:1.2.1.2]	YOR388c/4e-128/---	NA	biological_process:GO:0042183//formate catabolic process;GO:0055114//oxidation-reduction process;cellular_component:GO:0005829//cytosol;molecular_function:GO:0016616//oxidoreductase activity, acting on the CH-OH group of donors, NAD or NADP as acceptor;GO:0008863//formate dehydrogenase (NAD+) activity;GO:0051287//NAD binding;
Unigene1275_All	Unigene1275_All	1248.17	1369.93	1291.06	gi|701767846|gb|KGQ03304.1|/4.90979e-83/Ubiquitin-40S ribosomal protein S27a [Beauveria bassiana D1-5]	gi|573975529|ref|XM_006665647.1|/0.0/Cordyceps militaris CM01 ubiquitin (CCM_00487), partial mRNA	sp|P14799|RS27A_NEUCR/3e-80/Ubiquitin-40S ribosomal protein S27a OS=Neurospora crassa (strain ATCC 24698 / 74-OR23-1A / CBS 708.71 / DSM 1257 / FGSC 987) GN=ubi::crp-6 PE=1 SV=4	cmt:CCM_00487/5e-84/ubiquitin; K02977 small subunit ribosomal protein S27Ae	YLR167w_1/1e-49/---	NA	biological_process:GO:0006412//translation;cellular_component:GO:0005840//ribosome;molecular_function:GO:0003735//structural constituent of ribosome;
Unigene2415_All	Unigene2415_All	1233.46	987.09	653.7	gi|573982831|ref|XP_006669336.1|/4.72418e-161/ThiJ/PfpI family protein [Cordyceps militaris CM01] &gt;gi|346323154|gb|EGX92752.1| ThiJ/PfpI family protein [Cordyceps militaris CM01]	gi|573982830|ref|XM_006669273.1|/0.0/Cordyceps militaris CM01 ThiJ/PfpI family protein (CCM_04125), partial mRNA	sp|P08640|MUC1_YEAST/2e-12/Flocculation protein FLO11 OS=Saccharomyces cerevisiae (strain ATCC 204508 / S288c) GN=MUC1 PE=1 SV=2	sce:YIR019C/2e-11/FLO11, MUC1, STA4; Flo11p; K19851 flocculation protein FLO11	NA	PF13278/1.6E-15/Putative amidotransferase	NA
Unigene8424_All	Unigene8424_All	1221.74	1488.68	826.32	gi|573980989|ref|XP_006668415.1|/4.7313e-94/hypothetical protein CCM_03201 [Cordyceps militaris CM01] &gt;gi|346325332|gb|EGX94929.1| hypothetical protein CCM_03201 [Cordyceps militaris CM01]	gi|615467387|ref|XM_007599845.1|/1e-25/Colletotrichum fioriniae PJ7 DNase1 protein mRNA	sp|Q8TFG4|YL54_SCHPO/8e-09/Uncharacterized protein PB18E9.04c OS=Schizosaccharomyces pombe (strain 972 / ATCC 24843) GN=SPAPB18E9.04c PE=4 SV=1	ttt:THITE_2111816/5e-09/glycoside hydrolase family 18 protein; K01183 chitinase [EC:3.2.1.14]	Rv3876/3e-06/---	NA	NA
Unigene8441_All	Unigene8441_All	1211.2	642.41	351.06	gi|573990605|ref|XP_006673223.1|/0/late sexual development protein [Cordyceps militaris CM01] &gt;gi|346320167|gb|EGX89768.1| late sexual development protein [Cordyceps militaris CM01]	gi|573990604|ref|XM_006673160.1|/0.0/Cordyceps militaris CM01 late sexual development protein (CCM_08021), partial mRNA	sp|Q5BGP1|CWC22_EMENI/6e-08/Pre-mRNA-splicing factor cwc22 OS=Emericella nidulans (strain FGSC A4 / ATCC 38163 / CBS 112.46 / NRRL 194 / M139) GN=cwc22 PE=3 SV=2	cmt:CCM_07801/2e-126/COPII coat assembly protein sec16; K20353 COPII coat assembly protein SEC16	NA	PF13668/5.7E-7/Ferritin-like domain	NA
CL1128.Contig1_All	CL1128.Contig1_All	1208.79	1156.6	705.4	NA	gi|573981476|ref|XM_006668596.1|/7e-06/Cordyceps militaris CM01 multidrug resistance-associated protein, putative (CCM_03445), partial mRNA	NA	NA	NA	NA	NA
Unigene1098_All	Unigene1098_All	1205.02	889.17	1592.71	gi|573991613|ref|XP_006673727.1|/0/stomatin family protein [Cordyceps militaris CM01] &gt;gi|346318880|gb|EGX88482.1| stomatin family protein [Cordyceps militaris CM01]	gi|573991612|ref|XM_006673664.1|/0.0/Cordyceps militaris CM01 stomatin family protein (CCM_08526), partial mRNA	sp|O60121|YH77_SCHPO/1e-17/Uncharacterized protein C16G5.07c OS=Schizosaccharomyces pombe (strain 972 / ATCC 24843) GN=SPBC16G5.07c PE=3 SV=1	ure:UREG_03461/2e-18/similar to membrane associated protein SLP-2; K11293 protein HIRA/HIR1	AF1420/1e-33/---	SM00244/2.5E-39/prohibitin homologues	cellular_component:GO:0016020//membrane;
CL2275.Contig5_All	CL2275.Contig5_All	1188.16	1153.89	1083.32	gi|1000484628|gb|KXL45251.1|/7.76398e-100/hypothetical protein FE78DRAFT_90727 [Acidomyces richmondensis]	gi|309252550|gb|HQ232400.1|/1e-176/Beauveria bassiana clone BbUbi ubiquitin mRNA, partial cds	sp|P0CG63|UBI4P_YEAST/9e-102/Polyubiquitin OS=Saccharomyces cerevisiae (strain ATCC 204508 / S288c) GN=UBI4 PE=1 SV=1	spo:SPBC337.08c/9e-101/ubi4; ubiquitin; K08770 ubiquitin C	YLL039c/2e-101/---	SM00213/9.3E-35/Ubiquitin homologues	biological_process:GO:0000902//cell morphogenesis;GO:0036166//phenotypic switching;GO:0016567//protein ubiquitination;GO:0034605//cellular response to heat;GO:0051321//meiotic cell cycle;GO:0044182//filamentous growth of a population of unicellular organisms;GO:0009405//pathogenesis;cellular_component:GO:0005737//cytoplasm;GO:0005886//plasma membrane;molecular_function:GO:0031386//protein tag;
Unigene4699_All	Unigene4699_All	1183.95	1264.63	1135.94	gi|573979882|ref|XP_006667886.1|/1.26599e-117/60S ribosomal protein L10a [Cordyceps militaris CM01] &gt;gi|346324803|gb|EGX94400.1| 60S ribosomal protein L10a [Cordyceps militaris CM01]	gi|573979881|ref|XM_006667823.1|/0.0/Cordyceps militaris CM01 60S ribosomal protein L10a (CCM_02671), partial mRNA	sp|Q7RZS0|RL10A_NEUCR/2e-108/60S ribosomal protein L10a OS=Neurospora crassa (strain ATCC 24698 / 74-OR23-1A / CBS 708.71 / DSM 1257 / FGSC 987) GN=crp-74 PE=3 SV=1	cmt:CCM_02671/1e-118/60S ribosomal protein L10a; K02865 large subunit ribosomal protein L10Ae	SPCC1183.08c/2e-98/---	NA	biological_process:GO:0006412//translation;cellular_component:GO:0015934//large ribosomal subunit;molecular_function:GO:0003723//RNA binding;GO:0003735//structural constituent of ribosome;
Unigene454_All	Unigene454_All	1165.76	960.59	1036.68	gi|573985877|ref|XP_006670859.1|/3.41896e-96/hypothetical protein CCM_05652 [Cordyceps militaris CM01] &gt;gi|346321895|gb|EGX91494.1| hypothetical protein CCM_05652 [Cordyceps militaris CM01]	gi|16797917|gb|AF364027.1|AF364027/2e-17/Cordyceps brongniartii clone Bb10D4 microsatellite sequence	sp|P47179|DAN4_YEAST/3e-17/Cell wall protein DAN4 OS=Saccharomyces cerevisiae (strain ATCC 204508 / S288c) GN=DAN4 PE=2 SV=1	ttt:THITE_2111816/4e-17/glycoside hydrolase family 18 protein; K01183 chitinase [EC:3.2.1.14]	slr1403_2/4e-10/---	NA	NA
Unigene1303_All	Unigene1303_All	1156.01	939.45	637.32	gi|573976702|ref|XP_006666296.1|/2.46158e-78/hypothetical protein CCM_01075 [Cordyceps militaris CM01] &gt;gi|346326823|gb|EGX96419.1| hypothetical protein CCM_01075 [Cordyceps militaris CM01]	gi|681102165|emb|FO904942.1|/7e-08/Podospora anserina genomic DNA, chromosome 7	sp|O42854|YFHH_SCHPO/4e-23/SH3 domain-containing protein C23A1.17 OS=Schizosaccharomyces pombe (strain 972 / ATCC 24843) GN=SPAC23A1.17 PE=1 SV=1	aor:AOR_1_236094/1e-28/AO090120000140; actin associated protein Wsp1; K05747 Wiskott-Aldrich syndrome protein	XF0818/1e-26/---	NA	NA
CL1314.Contig2_All	CL1314.Contig2_All	1140.74	1152.66	1062.17	gi|573980150|ref|XP_006668020.1|/2.03946e-144/hypothetical protein CCM_02805 [Cordyceps militaris CM01] &gt;gi|346324937|gb|EGX94534.1| hypothetical protein CCM_02805 [Cordyceps militaris CM01]	gi|667644788|ref|XM_008596004.1|/2e-77/Beauveria bassiana ARSEF 2860 GPI anchored serine-rich protein partial mRNA	sp|O36027|WSP1_SCHPO/1e-21/Wiskott-Aldrich syndrome protein homolog 1 OS=Schizosaccharomyces pombe (strain 972 / ATCC 24843) GN=wsp1 PE=1 SV=3	ttt:THITE_2111816/1e-26/glycoside hydrolase family 18 protein; K01183 chitinase [EC:3.2.1.14]	Rv3876/5e-14/---	NA	cellular_component:GO:0016021//integral component of membrane;
Unigene5789_All	Unigene5789_All	1129.3	799.24	979.38	gi|573975110|ref|XP_006665500.1|/3.61488e-25/stress response RCI peptide, putative [Cordyceps militaris CM01] &gt;gi|346326027|gb|EGX95623.1| stress response RCI peptide, putative [Cordyceps militaris CM01]	gi|667660066|ref|XM_008603643.1|/2e-63/Beauveria bassiana ARSEF 2860 plasma membrane proteolipid 3 partial mRNA	sp|Q4HXT6|PMP3_GIBZE/1e-23/Plasma membrane proteolipid 3 OS=Gibberella zeae (strain PH-1 / ATCC MYA-4620 / FGSC 9075 / NRRL 31084) GN=PMP3 PE=3 SV=2	NA	SPBC713.11c/7e-15/---	NA	cellular_component:GO:0016021//integral component of membrane;
Unigene6376_All	Unigene6376_All	1124.37	1209.37	1303.11	gi|729187785|emb|CEJ89210.1|/2.25017e-105/Putative Peptidyl-prolyl cis-trans isomerase [Torrubiella hemipterigena]	gi|573974807|ref|XM_006665286.1|/0.0/Cordyceps militaris CM01 peptidyl-prolyl cis-trans isomerase (CCM_00126), partial mRNA	sp|P10255|CYPH_NEUCR/4e-83/Peptidyl-prolyl cis-trans isomerase, mitochondrial OS=Neurospora crassa (strain ATCC 24698 / 74-OR23-1A / CBS 708.71 / DSM 1257 / FGSC 987) GN=csr-1 PE=1 SV=1	maj:MAA_05234/6e-85/Peptidyl-prolyl cis-trans isomerase, cyclophilin-type; K01802 peptidylprolyl isomerase [EC:5.2.1.8]	SPBC28F2.03/2e-61/---	PF00160/8.1E-40/Cyclophilin type peptidyl-prolyl cis-trans isomerase/CLD	biological_process:GO:0006457//protein folding;GO:0000413//protein peptidyl-prolyl isomerization;GO:0006915//apoptotic process;cellular_component:GO:0005739//mitochondrion;molecular_function:GO:0003755//peptidyl-prolyl cis-trans isomerase activity;
Unigene7631_All	Unigene7631_All	1096.44	1130.47	1347.9	gi|701773556|gb|KGQ07943.1|/0/Phosphoenolpyruvate carboxykinase [Beauveria bassiana D1-5]	gi|573983520|ref|XM_006669618.1|/0.0/Cordyceps militaris CM01 phosphoenolpyruvate carboxykinase (CCM_04470), partial mRNA	sp|Q7RVS9|PCKA_NEUCR/0.0/Phosphoenolpyruvate carboxykinase [ATP] OS=Neurospora crassa (strain ATCC 24698 / 74-OR23-1A / CBS 708.71 / DSM 1257 / FGSC 987) GN=acu-6 PE=3 SV=2	tre:TRIREDRAFT_124115/0.0/phosphoenolpyruvate carboxykinase; K01610 phosphoenolpyruvate carboxykinase (ATP) [EC:4.1.1.49]	YKR097w/0.0/---	PF01293/2.2E-212/Phosphoenolpyruvate carboxykinase	biological_process:GO:0016310//phosphorylation;GO:0006094//gluconeogenesis;cellular_component:GO:0005829//cytosol;molecular_function:GO:0005524//ATP binding;GO:0016301//kinase activity;GO:0004612//phosphoenolpyruvate carboxykinase (ATP) activity;
Unigene5856_All	Unigene5856_All	1083.24	826.96	585.3	gi|573989851|ref|XP_006672846.1|/3.77929e-144/protein CCC1, putative [Cordyceps militaris CM01] &gt;gi|346319790|gb|EGX89391.1| protein CCC1, putative [Cordyceps militaris CM01]	gi|347000997|gb|CP003011.1|/3e-26/Thielavia terrestris NRRL 8126 chromosome 3, complete sequence	sp|P47818|CCC1_YEAST/6e-36/Protein CCC1 OS=Saccharomyces cerevisiae (strain ATCC 204508 / S288c) GN=CCC1 PE=1 SV=1	cmt:CCM_06535/1e-13/class III chitinase ChiA1; K01183 chitinase [EC:3.2.1.14]	YLR220w/1e-35/---	PTHR31851:SF1/4.3E-83/--	cellular_component:GO:0016021//integral component of membrane;
CL1080.Contig2_All	CL1080.Contig2_All	1070.92	895.43	1547.27	gi|573989067|ref|XP_006672454.1|/1.43166e-16/hypothetical protein CCM_07253 [Cordyceps militaris CM01] &gt;gi|346321233|gb|EGX90833.1| hypothetical protein CCM_07253 [Cordyceps militaris CM01]	gi|573989066|ref|XM_006672391.1|/1e-65/Cordyceps militaris CM01 hypothetical protein (CCM_07253), partial mRNA	NA	NA	NA	NA	NA
Unigene6366_All	Unigene6366_All	1034.67	1333.54	1246.94	gi|573978540|ref|XP_006667215.1|/5.37433e-69/clock-controlled protein 6 [Cordyceps militaris CM01] &gt;gi|346324132|gb|EGX93729.1| clock-controlled protein 6 [Cordyceps militaris CM01]	gi|573978539|ref|XM_006667152.1|/0.0/Cordyceps militaris CM01 clock-controlled protein 6 (CCM_01998), partial mRNA	sp|Q01302|CCG6_NEUCR/6e-33/Clock-controlled protein 6 OS=Neurospora crassa (strain ATCC 24698 / 74-OR23-1A / CBS 708.71 / DSM 1257 / FGSC 987) GN=ccg-6 PE=2 SV=2	dha:DEHA2C10120g/1e-11/DEHA2C10120p; K19475 WAS/WASL-interacting protein	XF0818/2e-09/---	NA	NA
Unigene3210_All	Unigene3210_All	1034.08	619.8	185.63	gi|573989163|ref|XP_006672502.1|/0/NB-ARC and TPR domain protein [Cordyceps militaris CM01] &gt;gi|346321281|gb|EGX90881.1| NB-ARC and TPR domain protein [Cordyceps militaris CM01]	gi|573989162|ref|XM_006672439.1|/0.0/Cordyceps militaris CM01 NB-ARC and TPR domain protein (CCM_07301), partial mRNA	NA	NA	NA	PF00931/3.1E-14/NB-ARC domain	molecular_function:GO:0043531//ADP binding;
Unigene3625_All	Unigene3625_All	1022.64	953.04	561.69	gi|573988501|ref|XP_006672171.1|/2.27739e-79/hypothetical protein CCM_06970 [Cordyceps militaris CM01] &gt;gi|346320950|gb|EGX90550.1| hypothetical protein CCM_06970 [Cordyceps militaris CM01]	gi|667659054|ref|XM_008603137.1|/1e-123/Beauveria bassiana ARSEF 2860 PRO41 protein partial mRNA	sp|Q9P7K6|SDO1L_SCHPO/6e-08/SDO1-like protein C21C3.19 OS=Schizosaccharomyces pombe (strain 972 / ATCC 24843) GN=SPBC21C3.19 PE=3 SV=1	lth:KLTH0G09306g/4e-06/KLTH0G09306p; K01238 SUN family beta-glucosidase [EC:3.2.1.-]	YDL140c/5e-06/---	NA	cellular_component:GO:0016021//integral component of membrane;
Unigene2396_All	Unigene2396_All	1021.16	1226.28	1058.56	gi|573975036|ref|XP_006665463.1|/7.64752e-175/ADP, ATP carrier protein [Cordyceps militaris CM01] &gt;gi|346325990|gb|EGX95586.1| ADP, ATP carrier protein [Cordyceps militaris CM01]	gi|573975035|ref|XM_006665400.1|/0.0/Cordyceps militaris CM01 ADP, ATP carrier protein (CCM_00240), partial mRNA	sp|P02723|ADT_NEUCR/4e-155/ADP,ATP carrier protein OS=Neurospora crassa (strain ATCC 24698 / 74-OR23-1A / CBS 708.71 / DSM 1257 / FGSC 987) GN=aac PE=3 SV=1	cmt:CCM_00240/7e-176/ADP, ATP carrier protein; K05863 solute carrier family 25 (mitochondrial adenine nucleotide translocator), member 4/5/6/31	BMEII0148/9e-07/---	NA	biological_process:GO:0055085//transmembrane transport;cellular_component:GO:0016021//integral component of membrane;GO:0005743//mitochondrial inner membrane;molecular_function:GO:0005215//transporter activity;
Unigene7623_All	Unigene7623_All	993.64	1301.58	1436.02	gi|573984091|ref|XP_006669966.1|/0/Glycoside hydrolase [Cordyceps militaris CM01] &gt;gi|346323785|gb|EGX93383.1| Glycoside hydrolase [Cordyceps militaris CM01]	gi|573984090|ref|XM_006669903.1|/0.0/Cordyceps militaris CM01 Glycoside hydrolase (CCM_04757), partial mRNA	sp|Q09788|ASL1_SCHPO/3e-29/Alkali-sensitive linkage protein 1 OS=Schizosaccharomyces pombe (strain 972 / ATCC 24843) GN=asl1 PE=1 SV=1	sce:YIR019C/1e-16/FLO11, MUC1, STA4; Flo11p; K19851 flocculation protein FLO11	Rv3876/3e-07/---	NA	biological_process:GO:0005975//carbohydrate metabolic process;molecular_function:GO:0016787//hydrolase activity;
CL418.Contig1_All	CL418.Contig1_All	961.19	717.86	715.19	gi|573991315|ref|XP_006673578.1|/0/HET-s/LopB domain protein [Cordyceps militaris CM01] &gt;gi|346318731|gb|EGX88333.1| HET-s/LopB domain protein [Cordyceps militaris CM01]	gi|573991314|ref|XM_006673515.1|/0.0/Cordyceps militaris CM01 HET-s/LopB domain protein (CCM_08376), partial mRNA	sp|Q00371|CAP22_COLGL/6e-21/Protein CAP22 OS=Colletotrichum gloeosporioides GN=CAP22 PE=2 SV=1	ani:AN8241.2/2e-08/similar to chitinase; K01183 chitinase [EC:3.2.1.14]	YPO2725/5e-07/---	PF00069/3.1E-6/Protein kinase domain	biological_process:GO:0006468//protein phosphorylation;molecular_function:GO:0005524//ATP binding;GO:0004672//protein kinase activity;
Unigene2166_All	Unigene2166_All	952.38	909.52	299.21	NA	NA	NA	NA	NA	NA	NA
Unigene6460_All	Unigene6460_All	948.23	1093.28	1145.58	gi|573975034|ref|XP_006665462.1|/4.88489e-55/40S ribosomal protein S25 [Cordyceps militaris CM01] &gt;gi|346325989|gb|EGX95585.1| 40S ribosomal protein S25 [Cordyceps militaris CM01]	gi|573975033|ref|XM_006665399.1|/0.0/Cordyceps militaris CM01 40S ribosomal protein S25 (CCM_00239), partial mRNA	sp|Q7SC06|RS25_NEUCR/5e-39/40S ribosomal protein S25 OS=Neurospora crassa (strain ATCC 24698 / 74-OR23-1A / CBS 708.71 / DSM 1257 / FGSC 987) GN=rps-25 PE=3 SV=1	cmt:CCM_00239/6e-56/40S ribosomal protein S25; K02975 small subunit ribosomal protein S25e	YLR333c/5e-24/---	NA	cellular_component:GO:0005840//ribosome;
CL1174.Contig2_All	CL1174.Contig2_All	942.83	1028.96	1091.4	gi|573989467|ref|XP_006672654.1|/2.03127e-117/2-hydroxychromene-2-carboxylate isomerase, putative [Cordyceps militaris CM01] &gt;gi|346319597|gb|EGX89198.1| 2-hydroxychromene-2-carboxylate isomerase, putative [Cordyceps militaris CM01]	gi|573989464|ref|XM_006672590.1|/0.0/Cordyceps militaris CM01 histone H3 (CCM_07449), partial mRNA	sp|P07041|H3_NEUCR/2e-69/Histone H3 OS=Neurospora crassa (strain ATCC 24698 / 74-OR23-1A / CBS 708.71 / DSM 1257 / FGSC 987) GN=hh3 PE=1 SV=3	cmt:CCM_07449/2e-69/histone H3; K11253 histone H3	SPBC1105.11c/1e-66/---	PTHR13887:SF11/5.8E-77/--	biological_process:GO:0055114//oxidation-reduction process;cellular_component:GO:0005634//nucleus;GO:0000786//nucleosome;molecular_function:GO:0015035//protein disulfide oxidoreductase activity;GO:0003677//DNA binding;GO:0016853//isomerase activity;GO:0046982//protein heterodimerization activity;
Unigene3582_All	Unigene3582_All	921.03	212.46	77.11	gi|667657557|ref|XP_008600610.1|/2.7837e-117/peptidase A4 family protein [Beauveria bassiana ARSEF 2860] &gt;gi|400595859|gb|EJP63647.1| peptidase A4 family protein [Beauveria bassiana ARSEF 2860]	gi|667657556|ref|XM_008602388.1|/1e-111/Beauveria bassiana ARSEF 2860 peptidase A4 family protein partial mRNA	sp|P24665|PRTA_ASPNG/3e-57/Aspergillopepsin-2 OS=Aspergillus niger PE=1 SV=1	cim:CIMG_04777/3e-09/pre-mRNA-splicing factor cwc22; K13100 pre-mRNA-splicing factor CWC22	DR2133/2e-08/---	NA	biological_process:GO:0006508//proteolysis;molecular_function:GO:0004190//aspartic-type endopeptidase activity;
Unigene2864_All	Unigene2864_All	912.9	649.31	809.14	gi|573976368|ref|XP_006666129.1|/6.26761e-95/integral membrane protein [Cordyceps militaris CM01] &gt;gi|346326656|gb|EGX96252.1| integral membrane protein [Cordyceps militaris CM01]	gi|573976367|ref|XM_006666066.1|/0.0/Cordyceps militaris CM01 integral membrane protein (CCM_00907), partial mRNA	sp|O94317|YH5D_SCHPO/3e-09/Uncharacterized serine-rich protein C215.13 OS=Schizosaccharomyces pombe (strain 972 / ATCC 24843) GN=SPBC215.13 PE=1 SV=1	afm:AFUA_5G03760/1e-08/class III chitinase ChiA1 (EC:3.2.1.14); K01183 chitinase [EC:3.2.1.14]	NA	PF01284/8.9E-14/Membrane-associating domain	cellular_component:GO:0016021//integral component of membrane;
Unigene4601_All	Unigene4601_All	911.34	827.18	714.5	gi|630041496|ref|XP_007841410.1|/3.17417e-83/Ubiquitin-conjugating enzyme [Pestalotiopsis fici W106-1] &gt;gi|475676163|gb|EMT73197.1| Ubiquitin-conjugating enzyme E2-16 kDa [Fusarium oxysporum f. sp. cubense race 4] &gt;gi|477520772|gb|ENH72897.1| Ubiquitin-conjugating enzyme E2-16 kDa [Fusarium oxysporum f. sp. cubense race 1] &gt;gi|517320977|emb|CCT71520.1| probable ubiquitin conjugating enzy…	gi|667644502|ref|XM_008595861.1|/1e-176/Beauveria bassiana ARSEF 2860 ubiquitin-conjugating enzyme E2 partial mRNA	sp|O74196|UBC1_COLGL/6e-83/Ubiquitin-conjugating enzyme E2-16 kDa OS=Colletotrichum gloeosporioides GN=UBC1 PE=2 SV=1	maj:MAA_04913/7e-84/ubiquitin-conjugating enzyme; K06689 ubiquitin-conjugating enzyme E2 D [EC:2.3.2.23]	SPBC119.02/6e-80/---	PF00179/7.2E-51/Ubiquitin-conjugating enzyme	molecular_function:GO:0005524//ATP binding;
Unigene6618_All	Unigene6618_All	904.63	1001.04	927.49	gi|573992303|ref|XP_006674072.1|/0/Plasma membrane ATPase (Proton pump) [Cordyceps militaris CM01] &gt;gi|346319225|gb|EGX88827.1| Plasma membrane ATPase (Proton pump) [Cordyceps militaris CM01]	gi|573992302|ref|XM_006674009.1|/0.0/Cordyceps militaris CM01 Plasma membrane ATPase (Proton pump) (CCM_08873), partial mRNA	sp|P07038|PMA1_NEUCR/0.0/Plasma membrane ATPase OS=Neurospora crassa (strain ATCC 24698 / 74-OR23-1A / CBS 708.71 / DSM 1257 / FGSC 987) GN=pma-1 PE=1 SV=1	cmt:CCM_08873/0.0/Plasma membrane ATPase (Proton pump); K01535 H+-transporting ATPase [EC:3.6.3.6]	SPAC1071.10c/0.0/---	SM00831/3.1E-16/Cation transporter/ATPase, N-terminus	biological_process:GO:0006754//ATP biosynthetic process;GO:1902600//hydrogen ion transmembrane transport;cellular_component:GO:0016021//integral component of membrane;molecular_function:GO:0046872//metal ion binding;GO:0005524//ATP binding;GO:0008553//hydrogen-exporting ATPase activity, phosphorylative mechanism;
Unigene5818_All	Unigene5818_All	885.86	768.87	730.18	gi|573990801|ref|XP_006673321.1|/0/glutamine synthetase [Cordyceps militaris CM01] &gt;gi|346320265|gb|EGX89866.1| glutamine synthetase [Cordyceps militaris CM01]	gi|573990800|ref|XM_006673258.1|/0.0/Cordyceps militaris CM01 glutamine synthetase (CCM_08119), partial mRNA	sp|Q9C2U9|GLNA_GIBFU/1e-174/Glutamine synthetase OS=Gibberella fujikuroi GN=GLN1 PE=3 SV=1	cmt:CCM_08119/0.0/glutamine synthetase; K01915 glutamine synthetase [EC:6.3.1.2]	YPR035w/2e-139/---	PF00120/3.0E-60/Glutamine synthetase, catalytic domain	biological_process:GO:0006542//glutamine biosynthetic process;molecular_function:GO:0005524//ATP binding;GO:0004356//glutamate-ammonia ligase activity;
Unigene3907_All	Unigene3907_All	868.53	1084.22	961.1	gi|573986283|ref|XP_006671062.1|/4.81907e-84/40S ribosomal protein S18 [Cordyceps militaris CM01] &gt;gi|346322098|gb|EGX91697.1| 40S ribosomal protein S18 [Cordyceps militaris CM01]	gi|573986282|ref|XM_006670999.1|/0.0/Cordyceps militaris CM01 40S ribosomal protein S18 (CCM_05855), partial mRNA	sp|O94754|RS18_SCHPO/1e-65/40S ribosomal protein S18 OS=Schizosaccharomyces pombe (strain 972 / ATCC 24843) GN=rps18a PE=1 SV=1	cmt:CCM_05855/5e-85/40S ribosomal protein S18; K02964 small subunit ribosomal protein S18e	SPCC1259.01c/3e-65/---	PS00646/-/Ribosomal protein S13 signature.	biological_process:GO:0006412//translation;cellular_component:GO:0005840//ribosome;molecular_function:GO:0003723//RNA binding;GO:0003735//structural constituent of ribosome;
Unigene6249_All	Unigene6249_All	850.06	715.05	791.94	gi|573988175|ref|XP_006672008.1|/0/muramidase, putative [Cordyceps militaris CM01] &gt;gi|346320787|gb|EGX90387.1| muramidase, putative [Cordyceps militaris CM01]	gi|953459682|ref|XM_014717830.1|/2e-10/Metarhizium majus ARSEF 297 Lysozyme-like domain protein partial mRNA	sp|P08640|MUC1_YEAST/2e-11/Flocculation protein FLO11 OS=Saccharomyces cerevisiae (strain ATCC 204508 / S288c) GN=MUC1 PE=1 SV=2	afm:AFUA_2G00430/2e-18/exo-beta-1,3-glucanase (EC:3.2.1.58); K01210 glucan 1,3-beta-glucosidase [EC:3.2.1.58]	DR0118/2e-07/---	PTHR21666/1.3E-45/--	NA
Unigene5520_All	Unigene5520_All	843.68	822.02	955.02	gi|1000864048|gb|KXN89862.1|/8.52735e-11/Polyubiquitin [Leucoagaricus sp. SymC.cos]	gi|667650736|ref|XM_008598978.1|/3e-35/Beauveria bassiana ARSEF 2860 Ubiquitin subgroup partial mRNA	sp|P0CG63|UBI4P_YEAST/6e-13/Polyubiquitin OS=Saccharomyces cerevisiae (strain ATCC 204508 / S288c) GN=UBI4 PE=1 SV=1	nce:NCER_101186/7e-12/ubiquitin-40S ribosomal protein S31 fusion protein; K02977 small subunit ribosomal protein S27Ae	YLL039c/2e-12/---	NA	NA
Unigene1142_All	Unigene1142_All	842.91	914.3	832.85	gi|573982481|ref|XP_006669161.1|/5.42479e-87/60S ribosomal protein L12 [Cordyceps militaris CM01] &gt;gi|346322979|gb|EGX92577.1| 60S ribosomal protein L12 [Cordyceps militaris CM01]	gi|573982480|ref|XM_006669098.1|/0.0/Cordyceps militaris CM01 60S ribosomal protein L12 (CCM_03950), partial mRNA	sp|Q9C285|RL12_NEUCR/5e-78/60S ribosomal protein L12 OS=Neurospora crassa (strain ATCC 24698 / 74-OR23-1A / CBS 708.71 / DSM 1257 / FGSC 987) GN=rpl-12 PE=3 SV=1	cmt:CCM_03950/5e-88/60S ribosomal protein L12; K02870 large subunit ribosomal protein L12e	SPCC31H12.04c/3e-67/---	NA	biological_process:GO:0006412//translation;cellular_component:GO:0005840//ribosome;molecular_function:GO:0003735//structural constituent of ribosome;
Unigene8242_All	Unigene8242_All	834.04	888.74	789.01	gi|667657049|ref|XP_008600356.1|/6.86999e-49/60S acidic ribosomal protein P2, putative [Beauveria bassiana ARSEF 2860] &gt;gi|400596256|gb|EJP64032.1| 60S acidic ribosomal protein P2, putative [Beauveria bassiana ARSEF 2860]	gi|573989104|ref|XM_006672410.1|/1e-92/Cordyceps militaris CM01 60S acidic ribosomal protein P2 (CCM_07272), partial mRNA	sp|Q9C3Z5|RLA2_PODAS/8e-41/60S acidic ribosomal protein P2 OS=Podospora anserina PE=3 SV=1	cmt:CCM_07272/1e-48/60S acidic ribosomal protein P2; K02943 large subunit ribosomal protein LP2	SPBP8B7.06/5e-33/---	NA	biological_process:GO:0006414//translational elongation;cellular_component:GO:0005840//ribosome;molecular_function:GO:0003735//structural constituent of ribosome;
Unigene7410_All	Unigene7410_All	832.49	766.54	940	gi|573987231|ref|XP_006671536.1|/8.41197e-160/hypothetical protein CCM_06333 [Cordyceps militaris CM01] &gt;gi|346322573|gb|EGX92172.1| hypothetical protein CCM_06333 [Cordyceps militaris CM01]	gi|573987230|ref|XM_006671473.1|/0.0/Cordyceps militaris CM01 hypothetical protein (CCM_06333), partial mRNA	sp|Q8TFG4|YL54_SCHPO/1e-08/Uncharacterized protein PB18E9.04c OS=Schizosaccharomyces pombe (strain 972 / ATCC 24843) GN=SPAPB18E9.04c PE=4 SV=1	NA	DR0479/8e-06/---	NA	NA
Unigene7529_All	Unigene7529_All	821.35	689.84	625.98	gi|573993127|ref|XP_006674484.1|/0/mannitol-1-phosphate 5-dehydrogenase [Cordyceps militaris CM01] &gt;gi|346318548|gb|EGX88151.1| mannitol-1-phosphate 5-dehydrogenase [Cordyceps militaris CM01]	gi|573993126|ref|XM_006674421.1|/0.0/Cordyceps militaris CM01 mannitol-1-phosphate 5-dehydrogenase (CCM_09287), partial mRNA	sp|Q7SA44|MTLD_NEUCR/2e-166/Mannitol-1-phosphate 5-dehydrogenase OS=Neurospora crassa (strain ATCC 24698 / 74-OR23-1A / CBS 708.71 / DSM 1257 / FGSC 987) GN=NCU07318 PE=3 SV=1	cmt:CCM_09287/0.0/mannitol-1-phosphate 5-dehydrogenase; K00009 mannitol-1-phosphate 5-dehydrogenase [EC:1.1.1.17]	BH3851/7e-77/---	PTHR30524/3.0E-217/--	biological_process:GO:0019594//mannitol metabolic process;GO:0055114//oxidation-reduction process;molecular_function:GO:0008926//mannitol-1-phosphate 5-dehydrogenase activity;GO:0050662//coenzyme binding;
Unigene5146_All	Unigene5146_All	816.09	762.91	687.33	gi|573979622|ref|XP_006667756.1|/1.02043e-62/hypothetical protein CCM_02541 [Cordyceps militaris CM01] &gt;gi|346324673|gb|EGX94270.1| hypothetical protein CCM_02541 [Cordyceps militaris CM01]	gi|573979623|ref|XM_006667694.1|/1e-125/Cordyceps militaris CM01 hypothetical protein (CCM_02542), partial mRNA	NA	NA	NA	NA	NA
CL1128.Contig2_All	CL1128.Contig2_All	814.99	760.25	480	NA	NA	NA	NA	NA	NA	NA
CL1163.Contig2_All	CL1163.Contig2_All	798.39	1010.84	1493.9	gi|573991927|ref|XP_006673884.1|/1.8328e-94/CipC-like antibiotic response protein, putative [Cordyceps militaris CM01] &gt;gi|346319037|gb|EGX88639.1| CipC-like antibiotic response protein, putative [Cordyceps militaris CM01]	gi|667655852|ref|XM_008601536.1|/6e-27/Beauveria bassiana ARSEF 2860 CipC protein partial mRNA	sp|P0CX15|YRF17_YEAST/1e-13/Y' element ATP-dependent helicase protein 1 copy 7 OS=Saccharomyces cerevisiae (strain ATCC 204508 / S288c) GN=YRF1-7 PE=2 SV=1	ttt:THITE_2111816/3e-13/glycoside hydrolase family 18 protein; K01183 chitinase [EC:3.2.1.14]	YPO2725/4e-07/---	PF12585/4.9E-35/Protein of unknown function (DUF3759)	NA
Unigene1170_All	Unigene1170_All	793.12	928.04	1254.52	gi|573988587|ref|XP_006672214.1|/4.02898e-108/hypothetical protein CCM_07013 [Cordyceps militaris CM01] &gt;gi|346320993|gb|EGX90593.1| hypothetical protein CCM_07013 [Cordyceps militaris CM01]	gi|667651866|ref|XM_008599543.1|/2e-42/Beauveria bassiana ARSEF 2860 PCI domain-containing protein partial mRNA	sp|P08640|MUC1_YEAST/1e-06/Flocculation protein FLO11 OS=Saccharomyces cerevisiae (strain ATCC 204508 / S288c) GN=MUC1 PE=1 SV=2	mbe:MBM_03974/1e-16/CDP-alcohol phosphatidyltransferase; K00993 ethanolaminephosphotransferase [EC:2.7.8.1]	YGL028c/6e-06/---	NA	NA
Unigene3779_All	Unigene3779_All	792.38	962.83	781.07	gi|573993021|ref|XP_006674431.1|/1.76932e-138/hypothetical protein CCM_09234 [Cordyceps militaris CM01] &gt;gi|346318495|gb|EGX88098.1| hypothetical protein CCM_09234 [Cordyceps militaris CM01]	gi|953461482|ref|XM_014718730.1|/6e-15/Metarhizium majus ARSEF 297 carbohydrate-binding WSC domain protein partial mRNA	sp|P32323|AGA1_YEAST/9e-08/A-agglutinin anchorage subunit OS=Saccharomyces cerevisiae (strain ATCC 204508 / S288c) GN=AGA1 PE=1 SV=1	ttt:THITE_2111816/1e-09/glycoside hydrolase family 18 protein; K01183 chitinase [EC:3.2.1.14]	NA	NA	NA
Unigene5433_All	Unigene5433_All	782.24	815.6	942.61	gi|573987149|ref|XP_006671495.1|/2.05147e-103/hypothetical protein CCM_06291 [Cordyceps militaris CM01] &gt;gi|346322532|gb|EGX92131.1| hypothetical protein CCM_06291 [Cordyceps militaris CM01]	gi|208658288|gb|EU886196.1|/1e-12/Beauveria bassiana strain ATCC 7159 beauvericin biosynthetic gene locus, complete sequence	sp|Q2GVT8|SEC31_CHAGB/4e-17/Protein transport protein SEC31 OS=Chaetomium globosum (strain ATCC 6205 / CBS 148.51 / DSM 1962 / NBRC 6347 / NRRL 1970) GN=SEC31 PE=3 SV=1	yli:YALI0D26191g/1e-18/YALI0D26191p; K19475 WAS/WASL-interacting protein	Rv3876/8e-16/---	NA	NA
Unigene1189_All	Unigene1189_All	763.27	257.65	199.34	gi|573984655|ref|XP_006670248.1|/2.34703e-31/Grg1 protein [Cordyceps militaris CM01] &gt;gi|346321284|gb|EGX90883.1| Grg1 protein [Cordyceps militaris CM01]	gi|573984654|ref|XM_006670185.1|/1e-117/Cordyceps militaris CM01 Grg1 protein (CCM_05039), partial mRNA	sp|P22151|GRG1_NEUCR/1e-17/Glucose-repressible gene protein OS=Neurospora crassa (strain ATCC 24698 / 74-OR23-1A / CBS 708.71 / DSM 1257 / FGSC 987) GN=grg-1 PE=2 SV=1	NA	NA	NA	biological_process:GO:0055114//oxidation-reduction process;molecular_function:GO:0016620//oxidoreductase activity, acting on the aldehyde or oxo group of donors, NAD or NADP as acceptor;
Unigene8453_All	Unigene8453_All	748.21	854.32	1137.08	gi|573981439|ref|XP_006668640.1|/7.46674e-137/actin cortical patch protein Sur7, putative [Cordyceps militaris CM01] &gt;gi|346325557|gb|EGX95154.1| actin cortical patch protein Sur7, putative [Cordyceps militaris CM01]	gi|667647632|ref|XM_008597426.1|/1e-139/Beauveria bassiana ARSEF 2860 SUR7 protein partial mRNA	sp|Q5A4M8|SUR7_CANAL/1e-22/Protein SUR7 OS=Candida albicans (strain SC5314 / ATCC MYA-2876) GN=SUR7 PE=1 SV=1	sce:YIR019C/7e-10/FLO11, MUC1, STA4; Flo11p; K19851 flocculation protein FLO11	YDL140c/8e-07/---	PF06687/1.4E-31/SUR7/PalI family	cellular_component:GO:0016021//integral component of membrane;GO:0005886//plasma membrane;
CL1908.Contig3_All	CL1908.Contig3_All	746.49	829.5	705.47	gi|573982155|ref|XP_006668998.1|/0/actin [Cordyceps militaris CM01] &gt;gi|667652695|ref|XP_008598179.1| Actin-like protein [Beauveria bassiana ARSEF 2860] &gt;gi|346322816|gb|EGX92414.1| actin [Cordyceps militaris CM01] &gt;gi|400598658|gb|EJP66367.1| Actin-like protein [Beauveria bassiana ARSEF 2860] &gt;gi|701769143|gb|KGQ04342.1| Actin, gamma [Beauveria bassiana D1-5]	gi|573982154|ref|XM_006668935.1|/0.0/Cordyceps militaris CM01 actin (CCM_03787), partial mRNA	sp|P78711|ACT_NEUCR/0.0/Actin OS=Neurospora crassa (strain ATCC 24698 / 74-OR23-1A / CBS 708.71 / DSM 1257 / FGSC 987) GN=act PE=3 SV=2	cmt:CCM_03787/0.0/actin; K05692 actin beta/gamma 1	SPBC32H8.12c/0.0/---	NA	biological_process:GO:1903475//mitotic actomyosin contractile ring assembly;GO:0071963//establishment or maintenance of cell polarity regulating cell shape;GO:0030100//regulation of endocytosis;GO:0043486//histone exchange;GO:0006357//regulation of transcription from RNA polymerase II promoter;GO:0000011//vacuole inheritance;GO:0030476//ascospore wall assembly;GO:0006281//DNA repair;GO:0016573//h…
Unigene8307_All	Unigene8307_All	743.03	663.26	774.56	gi|573982615|ref|XP_006669228.1|/7.5665e-149/isopentenyl-diphosphate delta-isomerase [Cordyceps militaris CM01] &gt;gi|346323046|gb|EGX92644.1| isopentenyl-diphosphate delta-isomerase [Cordyceps militaris CM01]	gi|573982614|ref|XM_006669165.1|/0.0/Cordyceps militaris CM01 isopentenyl-diphosphate delta-isomerase (CCM_04017), partial mRNA	sp|Q10132|IDI1_SCHPO/2e-81/Isopentenyl-diphosphate Delta-isomerase OS=Schizosaccharomyces pombe (strain 972 / ATCC 24843) GN=idi1 PE=2 SV=2	cmt:CCM_04017/7e-150/isopentenyl-diphosphate delta-isomerase; K01823 isopentenyl-diphosphate Delta-isomerase [EC:5.3.3.2]	SPBC106.15/7e-81/---	PS51462/18.811/Nudix hydrolase domain profile.	biological_process:GO:0045337//farnesyl diphosphate biosynthetic process;cellular_component:GO:0005634//nucleus;molecular_function:GO:0016787//hydrolase activity;GO:0004452//isopentenyl-diphosphate delta-isomerase activity;
Unigene1664_All	Unigene1664_All	742.99	739.82	692.74	gi|632916369|gb|KDB15905.1|/1.56238e-31/polyubiquitin [Ustilaginoidea virens]	gi|573980490|ref|XM_006668112.1|/1e-107/Cordyceps militaris CM01 ubiquitin fusion protein (CCM_02960), partial mRNA	sp|P0C224|RL40_NEUCR/4e-33/Ubiquitin-60S ribosomal protein L40 OS=Neurospora crassa (strain ATCC 24698 / 74-OR23-1A / CBS 708.71 / DSM 1257 / FGSC 987) GN=crp-79 PE=1 SV=2	cmt:CCM_02960/2e-32/ubiquitin fusion protein; K02927 large subunit ribosomal protein L40e	YLL039c/1e-28/---	NA	biological_process:GO:0006360//transcription from RNA polymerase I promoter;GO:0045905//positive regulation of translational termination;GO:0006413//translational initiation;GO:0006452//translational frameshifting;GO:0045901//positive regulation of translational elongation;cellular_component:GO:0005840//ribosome;GO:0005829//cytosol;GO:0000120//RNA polymerase I transcription factor complex;molecul…
Unigene3265_All	Unigene3265_All	739.11	255.38	204.24	gi|573990817|ref|XP_006673329.1|/2.87928e-100/mismatched base pair and cruciform DNA recognition protein, putative [Cordyceps militaris CM01] &gt;gi|346320273|gb|EGX89874.1| mismatched base pair and cruciform DNA recognition protein, putative [Cordyceps militaris CM01]	gi|667644410|ref|XM_008595815.1|/1e-108/Beauveria bassiana ARSEF 2860 mismatched base pair and cruciform dna recognition protein partial mRNA	NA	cthr:CTHT_0051240/5e-36/putative hmp1 protein; K12562 amphiphysin	NA	NA	NA
Unigene1548_All	Unigene1548_All	728.86	926.57	917.53	gi|573975136|ref|XP_006665513.1|/6.29337e-160/speract/scavenger receptor domain-containing protein [Cordyceps militaris CM01] &gt;gi|346326040|gb|EGX95636.1| speract/scavenger receptor domain-containing protein [Cordyceps militaris CM01]	gi|573975135|ref|XM_006665450.1|/0.0/Cordyceps militaris CM01 speract/scavenger receptor domain-containing protein (CCM_00290), partial mRNA	sp|O42799|ALL7_ASPFU/2e-23/Allergen Asp f 7 OS=Neosartorya fumigata (strain ATCC MYA-4609 / Af293 / CBS 101355 / FGSC A1100) GN=AFUA_4G06670 PE=1 SV=2	aor:AOR_1_236094/1e-18/AO090120000140; actin associated protein Wsp1; K05747 Wiskott-Aldrich syndrome protein	Rv3876/6e-12/---	PF03330/6.0E-5/Rare lipoprotein A (RlpA)-like double-psi beta-barrel	NA
Unigene4932_All	Unigene4932_All	728.57	762.86	682.07	gi|573980489|ref|XP_006668174.1|/7.54174e-87/Translation elongation factor, IF5A [Cordyceps militaris CM01] &gt;gi|346325091|gb|EGX94688.1| Translation elongation factor, IF5A [Cordyceps militaris CM01]	gi|573980488|ref|XM_006668111.1|/0.0/Cordyceps militaris CM01 Translation elongation factor, IF5A (CCM_02959), partial mRNA	sp|O94083|IF5A_CANAL/7e-62/Eukaryotic translation initiation factor 5A OS=Candida albicans (strain SC5314 / ATCC MYA-2876) GN=ANB1 PE=3 SV=1	cmt:CCM_02959/7e-88/Translation elongation factor, IF5A; K03263 translation initiation factor 5A	YEL034w/3e-61/---	NA	biological_process:GO:0006360//transcription from RNA polymerase I promoter;GO:0045905//positive regulation of translational termination;GO:0006413//translational initiation;GO:0006452//translational frameshifting;GO:0045901//positive regulation of translational elongation;cellular_component:GO:0005840//ribosome;GO:0005829//cytosol;GO:0000120//RNA polymerase I transcription factor complex;molecul…
Unigene6577_All	Unigene6577_All	722.02	499.08	306.27	gi|573991729|ref|XP_006673785.1|/0/siderophore biosynthesis protein, putative [Cordyceps militaris CM01] &gt;gi|346318938|gb|EGX88540.1| siderophore biosynthesis protein, putative [Cordyceps militaris CM01]	gi|667661954|ref|XM_008604587.1|/5e-88/Beauveria bassiana ARSEF 2860 aerobactin siderophore biosynthesis protein iucB partial mRNA	sp|Q5BGP1|CWC22_EMENI/6e-06/Pre-mRNA-splicing factor cwc22 OS=Emericella nidulans (strain FGSC A4 / ATCC 38163 / CBS 112.46 / NRRL 194 / M139) GN=cwc22 PE=3 SV=2	act:ACLA_031490/7e-06/cell cycle control protein (Cwf22), putative; K13100 pre-mRNA-splicing factor CWC22	YPO0991/2e-30/---	PTHR31438/1.1E-133/--	NA
Unigene2857_All	Unigene2857_All	704.17	544.12	385.03	gi|573987309|ref|XP_006671575.1|/5.46746e-123/hypothetical protein CCM_06372 [Cordyceps militaris CM01] &gt;gi|346322612|gb|EGX92211.1| hypothetical protein CCM_06372 [Cordyceps militaris CM01]	gi|573987308|ref|XM_006671512.1|/0.0/Cordyceps militaris CM01 hypothetical protein (CCM_06372), partial mRNA	NA	NA	NA	PF08843/1.7E-8/Nucleotidyl transferase of unknown function (DUF1814)	NA
Unigene7582_All	Unigene7582_All	697.18	145.37	9.64	gi|573986041|ref|XP_006670941.1|/0/carboxyphosphonoenolpyruvate phosphonomutase, putative [Cordyceps militaris CM01] &gt;gi|346321977|gb|EGX91576.1| carboxyphosphonoenolpyruvate phosphonomutase, putative [Cordyceps militaris CM01]	gi|667655666|ref|XM_008601443.1|/0.0/Beauveria bassiana ARSEF 2860 oxaloacetate acetylhydrolase partial mRNA	sp|P08640|MUC1_YEAST/5e-19/Flocculation protein FLO11 OS=Saccharomyces cerevisiae (strain ATCC 204508 / S288c) GN=MUC1 PE=1 SV=2	afm:AFUA_2G00540/6e-117/carboxyphosphonoenolpyruvate phosphonomutase (EC:4.1.3.30); K03417 methylisocitrate lyase [EC:4.1.3.30]	TVN0368/7e-40/---	PF13714/4.4E-46/Phosphoenolpyruvate phosphomutase	biological_process:GO:0016310//phosphorylation;molecular_function:GO:0016787//hydrolase activity;GO:0016301//kinase activity;
CL1080.Contig1_All	CL1080.Contig1_All	696.97	580.18	994.83	gi|573989067|ref|XP_006672454.1|/9.2363e-38/hypothetical protein CCM_07253 [Cordyceps militaris CM01] &gt;gi|346321233|gb|EGX90833.1| hypothetical protein CCM_07253 [Cordyceps militaris CM01]	gi|573989066|ref|XM_006672391.1|/5e-77/Cordyceps militaris CM01 hypothetical protein (CCM_07253), partial mRNA	NA	NA	NA	NA	biological_process:GO:0006355//regulation of transcription, DNA-templated;molecular_function:GO:0005488//binding;
Unigene6987_All	Unigene6987_All	689.05	667.5	790.17	gi|573986623|ref|XP_006671232.1|/0/GPI anchored cell wall protein, putative [Cordyceps militaris CM01] &gt;gi|346322269|gb|EGX91868.1| GPI anchored cell wall protein, putative [Cordyceps militaris CM01]	gi|667644024|ref|XM_008595622.1|/1e-166/Beauveria bassiana ARSEF 2860 GPI anchored cell wall protein partial mRNA	sp|P08640|MUC1_YEAST/3e-19/Flocculation protein FLO11 OS=Saccharomyces cerevisiae (strain ATCC 204508 / S288c) GN=MUC1 PE=1 SV=2	pfj:MYCFIDRAFT_216204/4e-43/glycoside hydrolase family 17 protein; K01199 glucan endo-1,3-beta-D-glucosidase [EC:3.2.1.39]	Rv3876/3e-11/---	PF09792/2.8E-53/Ubiquitin 3 binding protein But2 C-terminal domain	NA
Unigene1406_All	Unigene1406_All	687.58	505.87	572.37	gi|573977364|ref|XP_006666627.1|/0/hypothetical protein CCM_01408 [Cordyceps militaris CM01] &gt;gi|346327154|gb|EGX96750.1| hypothetical protein CCM_01408 [Cordyceps militaris CM01]	gi|347005580|gb|CP003002.1|/1e-27/Myceliophthora thermophila ATCC 42464 chromosome 1, complete sequence	sp|P08640|MUC1_YEAST/2e-20/Flocculation protein FLO11 OS=Saccharomyces cerevisiae (strain ATCC 204508 / S288c) GN=MUC1 PE=1 SV=2	sce:YIR019C/2e-19/FLO11, MUC1, STA4; Flo11p; K19851 flocculation protein FLO11	YPO2725/7e-10/---	NA	cellular_component:GO:0016021//integral component of membrane;
Unigene5014_All	Unigene5014_All	684.86	727.53	660.37	gi|573993027|ref|XP_006674434.1|/0/GPI-anchored cell wall beta-1,3-endoglucanase [Cordyceps militaris CM01] &gt;gi|346318498|gb|EGX88101.1| GPI-anchored cell wall beta-1,3-endoglucanase [Cordyceps militaris CM01]	gi|573993026|ref|XM_006674371.1|/0.0/Cordyceps militaris CM01 GPI-anchored cell wall beta-1,3-endoglucanase (CCM_09237), partial mRNA	sp|A2QH21|EGLC_ASPNC/4e-96/Probable glucan endo-1,3-beta-glucosidase eglC OS=Aspergillus niger (strain CBS 513.88 / FGSC A1513) GN=eglC PE=3 SV=2	cmt:CCM_09237/0.0/GPI-anchored cell wall beta-1,3-endoglucanase; K01199 glucan endo-1,3-beta-D-glucosidase [EC:3.2.1.39]	YGR282c/1e-21/---	PTHR16631/2.3E-152/--	biological_process:GO:0005975//carbohydrate metabolic process;
Unigene6508_All	Unigene6508_All	683.69	857.91	26.83	gi|573988793|ref|XP_006672317.1|/2.82306e-80/hypothetical protein CCM_07116 [Cordyceps militaris CM01] &gt;gi|346321096|gb|EGX90696.1| hypothetical protein CCM_07116 [Cordyceps militaris CM01]	gi|573988792|ref|XM_006672254.1|/0.0/Cordyceps militaris CM01 hypothetical protein (CCM_07116), partial mRNA	sp|P36594|RPB1_SCHPO/3e-06/DNA-directed RNA polymerase II subunit rpb1 OS=Schizosaccharomyces pombe (strain 972 / ATCC 24843) GN=rpb1 PE=1 SV=1	NA	SPBC28F2.12/7e-06/---	NA	NA
Unigene2212_All	Unigene2212_All	682.78	330.65	217.31	gi|573983473|ref|XP_006669657.1|/8.43056e-110/phosphoglycerate mutase family protein, putative [Cordyceps militaris CM01] &gt;gi|346323476|gb|EGX93074.1| phosphoglycerate mutase family protein, putative [Cordyceps militaris CM01]	gi|573983472|ref|XM_006669594.1|/0.0/Cordyceps militaris CM01 phosphoglycerate mutase family protein, putative (CCM_04446), partial mRNA	sp|P38739|WSC4_YEAST/2e-09/Cell wall integrity and stress response component 4 OS=Saccharomyces cerevisiae (strain ATCC 204508 / S288c) GN=WSC4 PE=1 SV=1	ttt:THITE_2111816/2e-08/glycoside hydrolase family 18 protein; K01183 chitinase [EC:3.2.1.14]	NA	NA	cellular_component:GO:0016021//integral component of membrane;
Unigene5232_All	Unigene5232_All	675.66	558.65	499.31	gi|701773505|gb|KGQ07905.1|/6.43041e-67/hypothetical protein BBAD15_g6794 [Beauveria bassiana D1-5]	NA	sp|P08640|MUC1_YEAST/2e-18/Flocculation protein FLO11 OS=Saccharomyces cerevisiae (strain ATCC 204508 / S288c) GN=MUC1 PE=1 SV=2	sce:YIR019C/3e-17/FLO11, MUC1, STA4; Flo11p; K19851 flocculation protein FLO11	YPO2725/1e-08/---	NA	NA
Unigene4490_All	Unigene4490_All	663.77	583.93	572.76	gi|398407251|ref|XP_003855091.1|/4.55011e-63/hypothetical protein MYCGRDRAFT_108219 [Zymoseptoria tritici IPO323] &gt;gi|339474975|gb|EGP90067.1| hypothetical protein MYCGRDRAFT_108219 [Zymoseptoria tritici IPO323]	gi|573989534|ref|XM_006672625.1|/1e-148/Cordyceps militaris CM01 Light chain 3 (LC3) (CCM_07484), partial mRNA	sp|Q2GVL1|ATG8_CHAGB/9e-62/Autophagy-related protein 8 OS=Chaetomium globosum (strain ATCC 6205 / CBS 148.51 / DSM 1962 / NBRC 6347 / NRRL 1970) GN=ATG8 PE=3 SV=1	maj:MAA_02674/3e-61/Ubiquitin domain of GABA-receptor-associated protein; K08341 GABA(A) receptor-associated protein	NA	NA	biological_process:GO:0006914//autophagy;
Unigene2894_All	Unigene2894_All	662.84	554.23	604	gi|573988541|ref|XP_006672191.1|/2.80068e-152/hypothetical protein CCM_06990 [Cordyceps militaris CM01] &gt;gi|346320970|gb|EGX90570.1| hypothetical protein CCM_06990 [Cordyceps militaris CM01]	gi|573988540|ref|XM_006672128.1|/0.0/Cordyceps militaris CM01 hypothetical protein (CCM_06990), partial mRNA	sp|Q5A5M7|RBR3_CANAL/1e-14/Cell wall protein RBR3 OS=Candida albicans (strain SC5314 / ATCC MYA-2876) GN=RBR3 PE=1 SV=2	afm:AFUA_5G03760/6e-14/class III chitinase ChiA1 (EC:3.2.1.14); K01183 chitinase [EC:3.2.1.14]	SPBC28F2.12/1e-11/---	NA	cellular_component:GO:0016021//integral component of membrane;
Unigene4557_All	Unigene4557_All	651.07	698.18	547.92	gi|573991647|ref|XP_006673744.1|/3.38501e-108/Hsp90 binding co-chaperone Sba1 [Cordyceps militaris CM01] &gt;gi|346318897|gb|EGX88499.1| Hsp90 binding co-chaperone Sba1 [Cordyceps militaris CM01]	gi|573991646|ref|XM_006673681.1|/0.0/Cordyceps militaris CM01 Hsp90 binding co-chaperone Sba1 (CCM_08543), partial mRNA	sp|Q11118|WOS2_SCHPO/5e-36/Protein wos2 OS=Schizosaccharomyces pombe (strain 972 / ATCC 24843) GN=wos2 PE=2 SV=1	lel:LELG_04776/3e-06/hypothetical protein; K16075 magnesium transporter	NA	PF04969/1.0E-10/CS domain	NA
Unigene3865_All	Unigene3865_All	649.58	496.67	355.28	gi|573993871|ref|XP_006674856.1|/4.4019e-78/hypothetical protein CCM_09660 [Cordyceps militaris CM01] &gt;gi|346318094|gb|EGX87699.1| hypothetical protein CCM_09660 [Cordyceps militaris CM01]	gi|667649694|ref|XM_008598457.1|/0.0/Beauveria bassiana ARSEF 2860 DDHD domain-containing protein partial mRNA	sp|Q9UTI9|YKZ2_SCHPO/3e-21/UPF0591 membrane protein C15E1.02c OS=Schizosaccharomyces pombe (strain 972 / ATCC 24843) GN=SPAC15E1.02c PE=3 SV=1	maj:MAA_01478/4e-07/SEC16 protein; K20353 COPII coat assembly protein SEC16	NA	PF08570/3.7E-21/Protein of unknown function (DUF1761)	cellular_component:GO:0016021//integral component of membrane;GO:0005737//cytoplasm;
Unigene3117_All	Unigene3117_All	647.85	759.62	655.91	gi|573977116|ref|XP_006666503.1|/0/AMP dependent CoA ligase, putative [Cordyceps militaris CM01] &gt;gi|346327030|gb|EGX96626.1| AMP dependent CoA ligase, putative [Cordyceps militaris CM01]	gi|667659416|ref|XM_008603318.1|/0.0/Beauveria bassiana ARSEF 2860 4-coumarate-CoA ligase partial mRNA	sp|P38137|FAT2_YEAST/4e-16/Peroxisomal-coenzyme A synthetase OS=Saccharomyces cerevisiae (strain ATCC 204508 / S288c) GN=PCS60 PE=1 SV=1	afm:AFUA_1G13110/5e-43/4-coumarate-CoA ligase (EC:6.2.1.12); K01904 4-coumarate--CoA ligase [EC:6.2.1.12]	PAE1379/6e-40/---	PF13193/9.6E-16/AMP-binding enzyme C-terminal domain	biological_process:GO:0008152//metabolic process;molecular_function:GO:0016874//ligase activity;
CL1163.Contig1_All	CL1163.Contig1_All	644.82	863.69	1274.52	gi|573991927|ref|XP_006673884.1|/3.62922e-89/CipC-like antibiotic response protein, putative [Cordyceps militaris CM01] &gt;gi|346319037|gb|EGX88639.1| CipC-like antibiotic response protein, putative [Cordyceps militaris CM01]	gi|667655852|ref|XM_008601536.1|/7e-27/Beauveria bassiana ARSEF 2860 CipC protein partial mRNA	sp|P08640|MUC1_YEAST/1e-08/Flocculation protein FLO11 OS=Saccharomyces cerevisiae (strain ATCC 204508 / S288c) GN=MUC1 PE=1 SV=2	ttt:THITE_2111816/6e-10/glycoside hydrolase family 18 protein; K01183 chitinase [EC:3.2.1.14]	SSO3043/7e-06/---	PF12585/3.1E-35/Protein of unknown function (DUF3759)	NA
Unigene1748_All	Unigene1748_All	633.18	540.46	442.27	gi|573983677|ref|XP_006669759.1|/0/hypothetical protein CCM_04548 [Cordyceps militaris CM01] &gt;gi|346323578|gb|EGX93176.1| hypothetical protein CCM_04548 [Cordyceps militaris CM01]	gi|228551659|gb|FJ374269.1|/0.0/Cordyceps militaris glyceraldehyde-3-phosphate dehydrogenase gene, complete cds	sp|P54117|G3P_COLLN/1e-170/Glyceraldehyde-3-phosphate dehydrogenase OS=Colletotrichum lindemuthianum GN=GPDA PE=3 SV=1	cmt:CCM_04549/0.0/glyceraldehyde 3-phosphate dehydrogenase (GAPDH); K00134 glyceraldehyde 3-phosphate dehydrogenase [EC:1.2.1.12]	SPBC32F12.11/5e-132/---	NA	biological_process:GO:0006006//glucose metabolic process;GO:0006096//glycolytic process;GO:0055114//oxidation-reduction process;molecular_function:GO:0050661//NADP binding;GO:0051287//NAD binding;GO:0004365//glyceraldehyde-3-phosphate dehydrogenase (NAD+) (phosphorylating) activity;
CL2147.Contig1_All	CL2147.Contig1_All	632.6	580.96	453.16	gi|729189719|emb|CEJ81062.1|/1.0204e-155/hypothetical protein VHEMI01212 [Torrubiella hemipterigena]	gi|573987178|ref|XM_006671447.1|/0.0/Cordyceps militaris CM01 hypothetical protein (CCM_06306), partial mRNA	NA	NA	NA	PF11807/5.5E-39/Domain of unknown function (DUF3328)	NA
Unigene2163_All	Unigene2163_All	631.41	784.74	665.13	gi|573981375|ref|XP_006668608.1|/3.80321e-76/ribosomal protein L14 [Cordyceps militaris CM01] &gt;gi|346325525|gb|EGX95122.1| ribosomal protein L14 [Cordyceps militaris CM01]	gi|573981374|ref|XM_006668545.1|/0.0/Cordyceps militaris CM01 ribosomal protein L14 (CCM_03394), partial mRNA	sp|P36105|RL14A_YEAST/3e-30/60S ribosomal protein L14-A OS=Saccharomyces cerevisiae (strain ATCC 204508 / S288c) GN=RPL14A PE=1 SV=1	cmt:CCM_03394/4e-77/ribosomal protein L14; K02875 large subunit ribosomal protein L14e	YKL006w/6e-30/---	PTHR11127:SF2/9.7E-54/--	biological_process:GO:0006412//translation;cellular_component:GO:0005840//ribosome;GO:0005634//nucleus;GO:0005829//cytosol;molecular_function:GO:0003735//structural constituent of ribosome;
CL791.Contig2_All	CL791.Contig2_All	620.85	614.65	625.72	gi|573978406|ref|XP_006667148.1|/4.35988e-54/60S ribosomal protein L30-2 [Cordyceps militaris CM01] &gt;gi|346327675|gb|EGX97271.1| 60S ribosomal protein L30-2 [Cordyceps militaris CM01]	gi|573978405|ref|XM_006667085.1|/0.0/Cordyceps militaris CM01 60S ribosomal protein L30-2 (CCM_01931), partial mRNA	sp|Q7S7F1|RL30_NEUCR/2e-38/60S ribosomal protein L30 OS=Neurospora crassa (strain ATCC 24698 / 74-OR23-1A / CBS 708.71 / DSM 1257 / FGSC 987) GN=rpl-30 PE=3 SV=1	cmt:CCM_01931/4e-55/60S ribosomal protein L30-2; K02908 large subunit ribosomal protein L30e	SPAC1250.05/6e-37/---	NA	biological_process:GO:0006412//translation;cellular_component:GO:0005840//ribosome;molecular_function:GO:0003735//structural constituent of ribosome;
Unigene4086_All	Unigene4086_All	616.93	827.21	842.85	gi|573985925|ref|XP_006670883.1|/1.2715e-166/allergen Asp F4-like protein [Cordyceps militaris CM01] &gt;gi|346321919|gb|EGX91518.1| allergen Asp F4-like protein [Cordyceps militaris CM01]	gi|573985924|ref|XM_006670820.1|/0.0/Cordyceps militaris CM01 allergen Asp F4-like protein (CCM_05676), partial mRNA	sp|O60024|ALL4_ASPFU/3e-29/Allergen Asp f 4 OS=Neosartorya fumigata (strain ATCC MYA-4609 / Af293 / CBS 101355 / FGSC A1100) GN=AFUA_2G03830 PE=1 SV=2	sce:YIR019C/9e-11/FLO11, MUC1, STA4; Flo11p; K19851 flocculation protein FLO11	Rv3876/2e-08/---	NA	NA
Unigene4089_All	Unigene4089_All	612.5	527.93	605.18	gi|573983389|ref|XP_006669615.1|/1.09804e-150/actin cytoskeleton protein [Cordyceps militaris CM01] &gt;gi|346323434|gb|EGX93032.1| actin cytoskeleton protein [Cordyceps militaris CM01]	gi|573983388|ref|XM_006669552.1|/0.0/Cordyceps militaris CM01 actin cytoskeleton protein (CCM_04404), partial mRNA	sp|P87216|VIPI_SCHPO/1e-38/Protein vip1 OS=Schizosaccharomyces pombe (strain 972 / ATCC 24843) GN=vip1 PE=1 SV=1	cim:CIMG_04777/2e-09/pre-mRNA-splicing factor cwc22; K13100 pre-mRNA-splicing factor CWC22	DR2133/9e-07/---	NA	molecular_function:GO:0000166//nucleotide binding;GO:0003676//nucleic acid binding;
Unigene6582_All	Unigene6582_All	610.17	631.11	526.76	gi|573976826|ref|XP_006666358.1|/0/serine protease [Cordyceps militaris CM01] &gt;gi|346326885|gb|EGX96481.1| serine protease [Cordyceps militaris CM01]	gi|573976825|ref|XM_006666295.1|/0.0/Cordyceps militaris CM01 serine protease (CCM_01138), partial mRNA	sp|P58371|SPM1_MAGO7/0.0/Subtilisin-like proteinase Spm1 OS=Magnaporthe oryzae (strain 70-15 / ATCC MYA-4617 / FGSC 8958) GN=SPM1 PE=3 SV=1	cmt:CCM_01138/0.0/serine protease; K01336 cerevisin [EC:3.4.21.48]	YEL060c/3e-126/---	NA	biological_process:GO:0006508//proteolysis;molecular_function:GO:0004252//serine-type endopeptidase activity;
Unigene7284_All	Unigene7284_All	602.92	616.96	716.46	gi|908386582|gb|KND87322.1|/3.33014e-31/40S ribosomal protein S30, partial [Tolypocladium ophioglossoides CBS 100239]	gi|573989942|ref|XM_006672829.1|/1e-103/Cordyceps militaris CM01 40S ribosomal protein S30 (CCM_07689), partial mRNA	sp|P0CX34|RS30B_YEAST/2e-21/40S ribosomal protein S30-B OS=Saccharomyces cerevisiae (strain ATCC 204508 / S288c) GN=RPS30B PE=1 SV=1	cmt:CCM_07689/2e-29/40S ribosomal protein S30; K02983 small subunit ribosomal protein S30e	NA	NA	biological_process:GO:0006412//translation;cellular_component:GO:0005840//ribosome;molecular_function:GO:0003735//structural constituent of ribosome;
Unigene8233_All	Unigene8233_All	601.77	724.69	677.62	gi|573979876|ref|XP_006667883.1|/4.89038e-22/ribosomal protein L39e, putative [Cordyceps militaris CM01] &gt;gi|346324800|gb|EGX94397.1| ribosomal protein L39e, putative [Cordyceps militaris CM01]	gi|667651166|ref|XM_008599193.1|/5e-64/Beauveria bassiana ARSEF 2860 60S ribosomal protein L39 partial mRNA	sp|Q96W55|RL39_CANAX/4e-21/60S ribosomal protein L39 OS=Candida albicans GN=RPL39 PE=3 SV=1	maj:MAA_05787/2e-21/Ribosomal protein L39e; K02924 large subunit ribosomal protein L39e	SPCC663.04/4e-18/---	NA	biological_process:GO:0006412//translation;cellular_component:GO:0005840//ribosome;molecular_function:GO:0003735//structural constituent of ribosome;
CL2275.Contig2_All	CL2275.Contig2_All	600.2	573.59	537.91	gi|396492504|ref|XP_003843815.1|/6.75824e-110/hypothetical protein LEMA_P014660.1 [Leptosphaeria maculans JN3] &gt;gi|312220395|emb|CBY00336.1| hypothetical protein LEMA_P014660.1 [Leptosphaeria maculans JN3]	gi|380446927|gb|JQ080063.1|/0.0/Hypocrea lixii clone pSG22 ubiquitin mRNA, partial cds	sp|P0CG63|UBI4P_YEAST/3e-110/Polyubiquitin OS=Saccharomyces cerevisiae (strain ATCC 204508 / S288c) GN=UBI4 PE=1 SV=1	spo:SPBC337.08c/4e-109/ubi4; ubiquitin; K08770 ubiquitin C	YLL039c/8e-110/---	PS50053/20.501/Ubiquitin domain profile.	biological_process:GO:0051321//meiotic cell cycle;GO:0016567//protein ubiquitination;cellular_component:GO:0005737//cytoplasm;molecular_function:GO:0031386//protein tag;
Unigene4987_All	Unigene4987_All	599.81	715.7	686.16	gi|573982207|ref|XP_006669024.1|/0/vacuolar protease A precursor [Cordyceps militaris CM01] &gt;gi|346322842|gb|EGX92440.1| vacuolar protease A precursor [Cordyceps militaris CM01]	gi|573982206|ref|XM_006668961.1|/0.0/Cordyceps militaris CM01 vacuolar protease A precursor (CCM_03813), partial mRNA	sp|Q01294|CARP_NEUCR/2e-154/Vacuolar protease A OS=Neurospora crassa (strain ATCC 24698 / 74-OR23-1A / CBS 708.71 / DSM 1257 / FGSC 987) GN=pep-4 PE=3 SV=2	cmt:CCM_03813/0.0/vacuolar protease A precursor; K01381 saccharopepsin [EC:3.4.23.25]	NA	PTHR13683/6.5E-177/--	biological_process:GO:0006508//proteolysis;molecular_function:GO:0004190//aspartic-type endopeptidase activity;
Unigene7175_All	Unigene7175_All	597.78	687.47	542.18	gi|573981107|ref|XP_006668474.1|/1.77296e-145/ribosomal protein S4 [Cordyceps militaris CM01] &gt;gi|346325391|gb|EGX94988.1| ribosomal protein S4 [Cordyceps militaris CM01]	gi|573981106|ref|XM_006668411.1|/0.0/Cordyceps militaris CM01 ribosomal protein S4 (CCM_03260), partial mRNA	sp|P0CX36|RS4B_YEAST/9e-116/40S ribosomal protein S4-B OS=Saccharomyces cerevisiae (strain ATCC 204508 / S288c) GN=RPS4B PE=1 SV=1	cmt:CCM_03260/2e-146/ribosomal protein S4; K02987 small subunit ribosomal protein S4e	YJR145c/2e-115/---	NA	biological_process:GO:0006412//translation;cellular_component:GO:0005840//ribosome;molecular_function:GO:0003735//structural constituent of ribosome;GO:0019843//rRNA binding;
Unigene1612_All	Unigene1612_All	597.17	754.55	645.5	gi|667656861|ref|XP_008600262.1|/6.00289e-107/translational activator GCN1 [Beauveria bassiana ARSEF 2860] &gt;gi|400596465|gb|EJP64239.1| translational activator GCN1 [Beauveria bassiana ARSEF 2860]	gi|667656860|ref|XM_008602040.1|/0.0/Beauveria bassiana ARSEF 2860 translational activator GCN1 partial mRNA	sp|O42699|RL19B_SCHPO/1e-70/60S ribosomal protein L19-B OS=Schizosaccharomyces pombe (strain 972 / ATCC 24843) GN=rpl19b PE=2 SV=2	tre:TRIREDRAFT_124314/1e-95/ribosomal protein L19A; K02885 large subunit ribosomal protein L19e	SPCC1682.14/2e-70/---	NA	biological_process:GO:0045859//regulation of protein kinase activity;GO:0033554//cellular response to stress;GO:0033674//positive regulation of kinase activity;GO:0006417//regulation of translation;cellular_component:GO:0005840//ribosome;molecular_function:GO:0043022//ribosome binding;GO:0019887//protein kinase regulator activity;GO:0003735//structural constituent of ribosome;GO:0019901//protein …
Unigene5814_All	Unigene5814_All	586.69	193.22	17.05	gi|573990613|ref|XP_006673227.1|/0/L-lactate dehydrogenase A [Cordyceps militaris CM01] &gt;gi|346320171|gb|EGX89772.1| L-lactate dehydrogenase A [Cordyceps militaris CM01]	gi|573990612|ref|XM_006673164.1|/0.0/Cordyceps militaris CM01 L-lactate dehydrogenase A (CCM_08025), partial mRNA	sp|Q9P4B6|LDHA_RHIOR/2e-64/L-lactate dehydrogenase A OS=Rhizopus oryzae GN=LDHA PE=3 SV=1	cmt:CCM_08025/0.0/L-lactate dehydrogenase A; K00016 L-lactate dehydrogenase [EC:1.1.1.27]	TM1867/8e-53/---	PTHR11540/3.3E-114/--	biological_process:GO:0019752//carboxylic acid metabolic process;GO:0005975//carbohydrate metabolic process;GO:0055114//oxidation-reduction process;molecular_function:GO:0004459//L-lactate dehydrogenase activity;
Unigene2281_All	Unigene2281_All	576.21	363.75	493.11	gi|573984469|ref|XP_006670155.1|/0/MFS monosaccharide transporter, putative [Cordyceps militaris CM01] &gt;gi|346323974|gb|EGX93572.1| MFS monosaccharide transporter, putative [Cordyceps militaris CM01]	gi|667650852|ref|XM_008599036.1|/0.0/Beauveria bassiana ARSEF 2860 hexose transporter partial mRNA	sp|Q92253|RCO3_NEUCR/3e-95/Probable glucose transporter rco-3 OS=Neurospora crassa (strain ATCC 24698 / 74-OR23-1A / CBS 708.71 / DSM 1257 / FGSC 987) GN=rco-3 PE=3 SV=2	cot:CORT_0C04940/1e-93/Hgt4 glucose and galactose sensor; K08139 MFS transporter, SP family, sugar:H+ symporter	CAC1345/3e-50/---	PS00216/-/Sugar transport proteins signature 1.	biological_process:GO:0008643//carbohydrate transport;GO:0055085//transmembrane transport;cellular_component:GO:0016021//integral component of membrane;molecular_function:GO:0022891//substrate-specific transmembrane transporter activity;
Unigene5883_All	Unigene5883_All	576.07	483.72	323.21	gi|573974788|ref|XP_006665339.1|/0/heat shock protein [Cordyceps militaris CM01] &gt;gi|346325866|gb|EGX95462.1| heat shock protein [Cordyceps militaris CM01]	gi|573974787|ref|XM_006665276.1|/0.0/Cordyceps militaris CM01 heat shock protein (CCM_00116), partial mRNA	sp|Q9USI5|STI1_SCHPO/0.0/Heat shock protein sti1 homolog OS=Schizosaccharomyces pombe (strain 972 / ATCC 24843) GN=sti1 PE=3 SV=1	cmt:CCM_00116/0.0/heat shock protein; K09553 stress-induced-phosphoprotein 1	SPAC17G6.19c/9e-19/---	PF13414/2.0E-10/TPR repeat	biological_process:GO:0006457//protein folding;GO:0043086//negative regulation of catalytic activity;cellular_component:GO:0005634//nucleus;GO:0005829//cytosol;molecular_function:GO:0042030//ATPase inhibitor activity;GO:0051879//Hsp90 protein binding;GO:0003729//mRNA binding;GO:0030544//Hsp70 protein binding;
Unigene648_All	Unigene648_All	573.99	660.02	503.27	gi|573976648|ref|XP_006666269.1|/2.42448e-125/elongation factor 1-beta [Cordyceps militaris CM01] &gt;gi|346326796|gb|EGX96392.1| elongation factor 1-beta [Cordyceps militaris CM01]	gi|573976647|ref|XM_006666206.1|/0.0/Cordyceps militaris CM01 elongation factor 1-beta (CCM_01048), partial mRNA	sp|O74173|EF1B_SCHPO/4e-70/Elongation factor 1-beta OS=Schizosaccharomyces pombe (strain 972 / ATCC 24843) GN=tef5 PE=2 SV=1	cmt:CCM_01048/2e-126/elongation factor 1-beta; K03232 elongation factor 1-beta	SPCC1450.04/1e-69/---	NA	biological_process:GO:0006414//translational elongation;cellular_component:GO:0005853//eukaryotic translation elongation factor 1 complex;molecular_function:GO:0003746//translation elongation factor activity;
Unigene7341_All	Unigene7341_All	569.24	696.46	945.89	gi|573981137|ref|XP_006668489.1|/2.53697e-92/peroxiredoxin-5, putative [Cordyceps militaris CM01] &gt;gi|346325406|gb|EGX95003.1| peroxiredoxin-5, putative [Cordyceps militaris CM01]	gi|596706785|ref|XM_007283569.1|/4e-31/Colletotrichum gloeosporioides Nara gc5 peroxisomal matrix protein (CGGC5_11807), partial mRNA	sp|P38013|AHP1_YEAST/1e-24/Peroxiredoxin type-2 OS=Saccharomyces cerevisiae (strain ATCC 204508 / S288c) GN=AHP1 PE=1 SV=4	cim:CIMG_05828/1e-56/peroxisomal matrix protein; K14171 alkyl hydroperoxide reductase 1 [EC:1.11.1.15]	YLR109w/3e-24/---	PTHR10430/1.3E-65/--	biological_process:GO:0034599//cellular response to oxidative stress;GO:0098869//cellular oxidant detoxification;GO:0055114//oxidation-reduction process;GO:0010038//response to metal ion;GO:0045454//cell redox homeostasis;cellular_component:GO:0005737//cytoplasm;molecular_function:GO:0008379//thioredoxin peroxidase activity;
Unigene1404_All	Unigene1404_All	558.88	610.6	776.74	gi|573992405|ref|XP_006674123.1|/0/bZIP transcription factor (LziP), putative [Cordyceps militaris CM01] &gt;gi|346319276|gb|EGX88878.1| bZIP transcription factor (LziP), putative [Cordyceps militaris CM01]	gi|667657940|ref|XM_008602580.1|/0.0/Beauveria bassiana ARSEF 2860 bZIP transcription factor partial mRNA	sp|P08640|MUC1_YEAST/2e-22/Flocculation protein FLO11 OS=Saccharomyces cerevisiae (strain ATCC 204508 / S288c) GN=MUC1 PE=1 SV=2	sce:YIR019C/3e-21/FLO11, MUC1, STA4; Flo11p; K19851 flocculation protein FLO11	NA	PS50217/9.048/Basic-leucine zipper (bZIP) domain profile.	biological_process:GO:0006355//regulation of transcription, DNA-templated;molecular_function:GO:0043565//sequence-specific DNA binding;GO:0003700//transcription factor activity, sequence-specific DNA binding;
CL455.Contig1_All	CL455.Contig1_All	558.34	474.41	66.6	gi|573979676|ref|XP_006667783.1|/0/Fungal transcriptional regulatory protein [Cordyceps militaris CM01] &gt;gi|346324700|gb|EGX94297.1| Fungal transcriptional regulatory protein [Cordyceps militaris CM01]	gi|573979675|ref|XM_006667720.1|/0.0/Cordyceps militaris CM01 Fungal transcriptional regulatory protein (CCM_02568), partial mRNA	sp|Q8TFG4|YL54_SCHPO/6e-09/Uncharacterized protein PB18E9.04c OS=Schizosaccharomyces pombe (strain 972 / ATCC 24843) GN=SPAPB18E9.04c PE=4 SV=1	ang:ANI_1_368054/2e-10/An06g00330; chromatin structure remodeling complex protein RSC3; K11758 chromatin structure-remodeling complex subunit RSC3/30	NA	PF00172/4.2E-7/Fungal Zn(2)-Cys(6) binuclear cluster domain	biological_process:GO:0006357//regulation of transcription from RNA polymerase II promoter;cellular_component:GO:0005634//nucleus;molecular_function:GO:0003677//DNA binding;GO:0000981//RNA polymerase II transcription factor activity, sequence-specific DNA binding;GO:0008270//zinc ion binding;
Unigene6103_All	Unigene6103_All	556.52	702.58	210.79	gi|573974954|ref|XP_006665422.1|/0/alkaline serine protease AorO [Cordyceps militaris CM01] &gt;gi|346325949|gb|EGX95545.1| alkaline serine protease AorO [Cordyceps militaris CM01]	gi|573974953|ref|XM_006665359.1|/0.0/Cordyceps militaris CM01 alkaline serine protease AorO (CCM_00199), partial mRNA	sp|Q70DX9|SED1_ASPFU/1e-106/Tripeptidyl-peptidase sed1 OS=Neosartorya fumigata (strain ATCC MYA-4609 / Af293 / CBS 101355 / FGSC A1100) GN=sed1 PE=1 SV=1	cmt:CCM_00199/0.0/alkaline serine protease AorO; K01279 tripeptidyl-peptidase I [EC:3.4.14.9]	Ta0976/7e-23/---	PF00082/5.8E-9/Subtilase family	biological_process:GO:0006508//proteolysis;molecular_function:GO:0004252//serine-type endopeptidase activity;
Unigene5596_All	Unigene5596_All	548.58	514.66	585.67	gi|667655285|ref|XP_008599474.1|/7.6869e-18/hypothetical protein BBA_06155 [Beauveria bassiana ARSEF 2860] &gt;gi|400597245|gb|EJP64980.1| hypothetical protein BBA_06155 [Beauveria bassiana ARSEF 2860]	gi|346995772|gb|CP003009.1|/3e-07/Thielavia terrestris NRRL 8126 chromosome 1, complete sequence	NA	NA	NA	NA	cellular_component:GO:0016021//integral component of membrane;
CL2224.Contig2_All	CL2224.Contig2_All	547.99	441.39	504.18	gi|701772361|gb|KGQ06950.1|/3.29199e-151/hypothetical protein BBAD15_g7738 [Beauveria bassiana D1-5]	gi|681097816|emb|FO904939.1|/1e-07/Podospora anserina genomic DNA, chromosome 4	sp|O94317|YH5D_SCHPO/3e-08/Uncharacterized serine-rich protein C215.13 OS=Schizosaccharomyces pombe (strain 972 / ATCC 24843) GN=SPBC215.13 PE=1 SV=1	bcom:BAUCODRAFT_196669/7e-08/glycoside hydrolase family 3 protein; K05349 beta-glucosidase [EC:3.2.1.21]	NA	NA	cellular_component:GO:0016020//membrane;
Unigene5590_All	Unigene5590_All	540.91	270.47	275.9	gi|572278328|gb|ETS01520.1|/2.31432e-08/hypothetical protein M419DRAFT_123529 [Trichoderma reesei RUT C-30]	NA	NA	NA	NA	NA	NA
Unigene4495_All	Unigene4495_All	535.5	607.1	557.98	gi|573976962|ref|XP_006666426.1|/2.10369e-97/Complex 1 LYR protein [Cordyceps militaris CM01] &gt;gi|346326953|gb|EGX96549.1| Complex 1 LYR protein [Cordyceps militaris CM01]	gi|573976961|ref|XM_006666363.1|/0.0/Cordyceps militaris CM01 Complex 1 LYR protein (CCM_01206), partial mRNA	sp|L7HZV6|H2A_MAGOY/1e-68/Histone H2A OS=Magnaporthe oryzae (strain Y34) GN=HTA1 PE=2 SV=1	cmt:CCM_01206/2e-98/Complex 1 LYR protein; K03965 NADH dehydrogenase (ubiquinone) 1 beta subcomplex subunit 9	SPAC19G12.06c/5e-58/---	PTHR12868:SF0/9.3E-43/--	biological_process:GO:0006120//mitochondrial electron transport, NADH to ubiquinone;GO:0006281//DNA repair;cellular_component:GO:0005634//nucleus;GO:0005747//mitochondrial respiratory chain complex I;GO:0000786//nucleosome;molecular_function:GO:0003677//DNA binding;GO:0046982//protein heterodimerization activity;
Unigene5484_All	Unigene5484_All	534.27	638.55	544.46	gi|573979974|ref|XP_006667932.1|/8.83178e-144/60S ribosomal protein L2 [Cordyceps militaris CM01] &gt;gi|346324849|gb|EGX94446.1| 60S ribosomal protein L2 [Cordyceps militaris CM01]	gi|573979973|ref|XM_006667869.1|/0.0/Cordyceps militaris CM01 60S ribosomal protein L2 (CCM_02717), partial mRNA	sp|Q75AP7|RL2_ASHGO/2e-118/60S ribosomal protein L2 OS=Ashbya gossypii (strain ATCC 10895 / CBS 109.51 / FGSC 9923 / NRRL Y-1056) GN=RPL2 PE=4 SV=1	cmt:CCM_02717/8e-145/60S ribosomal protein L2; K02938 large subunit ribosomal protein L8e	YIL018w/3e-116/---	PF00181/2.6E-12/Ribosomal Proteins L2, RNA binding domain	biological_process:GO:0006412//translation;cellular_component:GO:0005840//ribosome;molecular_function:GO:0003735//structural constituent of ribosome;
Unigene5501_All	Unigene5501_All	533.09	503.53	519.3	gi|701776337|gb|KGQ10233.1|/1.03465e-89/Glutathione peroxidase 2 [Beauveria bassiana D1-5]	gi|573980760|ref|XM_006668238.1|/0.0/Cordyceps militaris CM01 glutathione peroxidase family protein (CCM_03086), partial mRNA	sp|O59858|GPX1_SCHPO/7e-52/Glutathione peroxidase OS=Schizosaccharomyces pombe (strain 972 / ATCC 24843) GN=gpx1 PE=2 SV=1	cmt:CCM_03086/2e-88/glutathione peroxidase family protein; K00432 glutathione peroxidase [EC:1.11.1.9]	SPBC32F12.03c/2e-51/---	PTHR11592/9.5E-86/--	biological_process:GO:0055114//oxidation-reduction process;GO:0045454//cell redox homeostasis;GO:0098869//cellular oxidant detoxification;GO:0042744//hydrogen peroxide catabolic process;GO:0070301//cellular response to hydrogen peroxide;cellular_component:GO:0005634//nucleus;GO:0005829//cytosol;GO:0005739//mitochondrion;molecular_function:GO:0004602//glutathione peroxidase activity;GO:0008379//th…
Unigene498_All	Unigene498_All	527.68	694.16	573.46	gi|573979108|ref|XP_006667499.1|/4.82058e-81/ribosomal protein S15, eukaryotic/archaeal [Cordyceps militaris CM01] &gt;gi|346324416|gb|EGX94013.1| ribosomal protein S15, eukaryotic/archaeal [Cordyceps militaris CM01]	gi|573979107|ref|XM_006667436.1|/0.0/Cordyceps militaris CM01 ribosomal protein S15, eukaryotic/archaeal (CCM_02284), partial mRNA	sp|P34737|RS15_PODAS/8e-74/40S ribosomal protein S15 OS=Podospora anserina GN=RPS15 PE=3 SV=1	cmt:CCM_02284/5e-82/ribosomal protein S15, eukaryotic/archaeal; K02958 small subunit ribosomal protein S15e	SPCC1393.03/4e-57/---	PR00975/5.2E-12/Ribosomal protein S19 family signature	biological_process:GO:0006412//translation;cellular_component:GO:0015935//small ribosomal subunit;molecular_function:GO:0003723//RNA binding;GO:0003735//structural constituent of ribosome;
Unigene375_All	Unigene375_All	526.09	544.9	689.8	gi|667663217|ref|XP_008603440.1|/9.11762e-25/cytochrome c oxidase subunit COX9 [Beauveria bassiana ARSEF 2860] &gt;gi|400592895|gb|EJP60934.1| cytochrome c oxidase subunit COX9 [Beauveria bassiana ARSEF 2860]	gi|667663216|ref|XM_008605218.1|/3e-40/Beauveria bassiana ARSEF 2860 cytochrome c oxidase subunit COX9 partial mRNA	sp|Q757F0|COX9_ASHGO/5e-12/Cytochrome c oxidase subunit 7A OS=Ashbya gossypii (strain ATCC 10895 / CBS 109.51 / FGSC 9923 / NRRL Y-1056) GN=COX9 PE=3 SV=3	mbe:MBM_04698/1e-13/cytochrome c oxidase family protein; K02269 cytochrome c oxidase subunit 7	NA	NA	biological_process:GO:1902600//hydrogen ion transmembrane transport;GO:0022904//respiratory electron transport chain;cellular_component:GO:0016021//integral component of membrane;GO:0005746//mitochondrial respiratory chain;molecular_function:GO:0004129//cytochrome-c oxidase activity;
Unigene6528_All	Unigene6528_All	524.03	606.82	539.73	gi|667656467|ref|XP_008600065.1|/1.92276e-80/60S ribosomal protein L24 [Beauveria bassiana ARSEF 2860] &gt;gi|400596593|gb|EJP64364.1| 60S ribosomal protein L24 [Beauveria bassiana ARSEF 2860] &gt;gi|701772760|gb|KGQ07289.1| 60S ribosomal protein L24 [Beauveria bassiana D1-5]	gi|573981138|ref|XM_006668427.1|/0.0/Cordyceps militaris CM01 60S ribosomal protein L24 (CCM_03276), partial mRNA	sp|Q7SDU2|RL24_NEUCR/2e-64/60S ribosomal protein L24 OS=Neurospora crassa (strain ATCC 24698 / 74-OR23-1A / CBS 708.71 / DSM 1257 / FGSC 987) GN=rpl-24 PE=3 SV=1	cmt:CCM_03276/2e-72/60S ribosomal protein L24; K02896 large subunit ribosomal protein L24e	YGR148c/1e-48/---	NA	cellular_component:GO:0005840//ribosome;
Unigene3309_All	Unigene3309_All	523.63	242.55	53.93	gi|573992949|ref|XP_006674395.1|/0/sarcosine oxidase, putative [Cordyceps militaris CM01] &gt;gi|346318459|gb|EGX88062.1| sarcosine oxidase, putative [Cordyceps militaris CM01]	gi|667660460|ref|XM_008603840.1|/2e-80/Beauveria bassiana ARSEF 2860 sarcosine oxidase partial mRNA	sp|O43029|FAP1_SCHPO/1e-26/L-pipecolate oxidase OS=Schizosaccharomyces pombe (strain 972 / ATCC 24843) GN=fap1 PE=1 SV=1	cmt:CCM_00374/7e-52/FAD dependent oxidoreductase; K00306 sarcosine oxidase / L-pipecolate oxidase [EC:1.5.3.1 1.5.3.7]	SPBC354.15/3e-26/---	PTHR10961/4.4E-143/--	biological_process:GO:0055114//oxidation-reduction process;cellular_component:GO:0016021//integral component of membrane;molecular_function:GO:0016491//oxidoreductase activity;
Unigene6755_All	Unigene6755_All	522.79	652.75	521.15	gi|573986911|ref|XP_006671376.1|/0/ATP synthase alpha chain [Cordyceps militaris CM01] &gt;gi|346322413|gb|EGX92012.1| ATP synthase alpha chain [Cordyceps militaris CM01]	gi|573986910|ref|XM_006671313.1|/0.0/Cordyceps militaris CM01 ATP synthase alpha chain (CCM_06172), partial mRNA	sp|P37211|ATPA_NEUCR/0.0/ATP synthase subunit alpha, mitochondrial OS=Neurospora crassa (strain ATCC 24698 / 74-OR23-1A / CBS 708.71 / DSM 1257 / FGSC 987) GN=atp-1 PE=3 SV=1	cmt:CCM_06172/0.0/ATP synthase alpha chain; K02132 F-type H+-transporting ATPase subunit alpha	YBL099w/0.0/---	PS00152/-/ATP synthase alpha and beta subunits signature.	biological_process:GO:0015986//ATP synthesis coupled proton transport;GO:0015991//ATP hydrolysis coupled proton transport;cellular_component:GO:0045261//proton-transporting ATP synthase complex, catalytic core F(1);molecular_function:GO:0005524//ATP binding;GO:0046933//proton-transporting ATP synthase activity, rotational mechanism;GO:0046961//proton-transporting ATPase activity, rotational mecha…
Unigene1552_All	Unigene1552_All	519.03	574.26	464.46	gi|573987885|ref|XP_006671863.1|/0/enolase [Cordyceps militaris CM01] &gt;gi|346320640|gb|EGX90240.1| enolase [Cordyceps militaris CM01]	gi|573987884|ref|XM_006671800.1|/0.0/Cordyceps militaris CM01 enolase (CCM_06659), partial mRNA	sp|Q96X30|ENO_ASPFU/0.0/Enolase OS=Neosartorya fumigata (strain ATCC MYA-4609 / Af293 / CBS 101355 / FGSC A1100) GN=enoA PE=1 SV=3	cmt:CCM_06659/0.0/enolase; K01689 enolase [EC:4.2.1.11]	YGR254w/0.0/---	PR00148/5.651287E-48/Enolase signature	biological_process:GO:0006096//glycolytic process;cellular_component:GO:0000015//phosphopyruvate hydratase complex;molecular_function:GO:0000287//magnesium ion binding;GO:0004634//phosphopyruvate hydratase activity;
Unigene4761_All	Unigene4761_All	518.99	646.78	547.17	gi|573976852|ref|XP_006666371.1|/1.20527e-83/60S ribosomal protein L27a (L29) [Cordyceps militaris CM01] &gt;gi|346326898|gb|EGX96494.1| 60S ribosomal protein L27a (L29) [Cordyceps militaris CM01]	gi|573976851|ref|XM_006666308.1|/0.0/Cordyceps militaris CM01 60S ribosomal protein L27a (L29) (CCM_01151), partial mRNA	sp|P78987|RL27A_BLUGH/1e-72/60S ribosomal protein L27a OS=Blumeria graminis f. sp. hordei PE=2 SV=1	cmt:CCM_01151/1e-84/60S ribosomal protein L27a (L29); K02900 large subunit ribosomal protein L27Ae	YGL103w/4e-67/---	NA	biological_process:GO:0006412//translation;cellular_component:GO:0005634//nucleus;GO:0015934//large ribosomal subunit;molecular_function:GO:0003723//RNA binding;GO:0003735//structural constituent of ribosome;
Unigene8230_All	Unigene8230_All	517.04	684.51	580.41	gi|573988525|ref|XP_006672183.1|/2.64132e-56/60S ribosomal protein L33 [Cordyceps militaris CM01] &gt;gi|346320962|gb|EGX90562.1| 60S ribosomal protein L33 [Cordyceps militaris CM01]	gi|573988524|ref|XM_006672120.1|/0.0/Cordyceps militaris CM01 60S ribosomal protein L33 (CCM_06982), partial mRNA	sp|Q9USX4|RL33A_SCHPO/1e-39/60S ribosomal protein L33-A OS=Schizosaccharomyces pombe (strain 972 / ATCC 24843) GN=rpl33a PE=3 SV=2	cmt:CCM_06982/3e-57/60S ribosomal protein L33; K02917 large subunit ribosomal protein L35Ae	SPCP31B10.08c/7e-38/---	NA	biological_process:GO:0006412//translation;cellular_component:GO:0005840//ribosome;molecular_function:GO:0003735//structural constituent of ribosome;
Unigene4774_All	Unigene4774_All	516.84	614.52	518.2	gi|573982477|ref|XP_006669159.1|/3.5811e-162/alpha/beta fold family hydrolase, putative [Cordyceps militaris CM01] &gt;gi|346322977|gb|EGX92575.1| alpha/beta fold family hydrolase, putative [Cordyceps militaris CM01]	gi|667657502|ref|XM_008602361.1|/0.0/Beauveria bassiana ARSEF 2860 ribosomal S3Ae family protein partial mRNA	sp|C7YTD6|RS3A_NECH7/8e-138/40S ribosomal protein S1 OS=Nectria haematococca (strain 77-13-4 / ATCC MYA-4622 / FGSC 9596 / MPVI) GN=RPS1 PE=3 SV=1	fgr:FGSG_07480/5e-137/40S ribosomal protein S3aE; K02984 small subunit ribosomal protein S3Ae	YML063w/7e-102/---	PF12697/5.4E-32/Alpha/beta hydrolase family	biological_process:GO:0006412//translation;cellular_component:GO:0022627//cytosolic small ribosomal subunit;molecular_function:GO:0016787//hydrolase activity;GO:0003735//structural constituent of ribosome;
Unigene1277_All	Unigene1277_All	516.77	527.61	598.78	gi|667660761|ref|XP_008602212.1|/1.03824e-29/ATP synthase subunit J [Beauveria bassiana ARSEF 2860] &gt;gi|400594364|gb|EJP62219.1| ATP synthase subunit J [Beauveria bassiana ARSEF 2860]	gi|667660760|ref|XM_008603990.1|/4e-70/Beauveria bassiana ARSEF 2860 ATP synthase subunit J partial mRNA	sp|P81450|ATP18_YEAST/4e-10/ATP synthase subunit J, mitochondrial OS=Saccharomyces cerevisiae (strain ATCC 204508 / S288c) GN=ATP18 PE=1 SV=1	cmt:CCM_04880/2e-18/ATPase, F0 complex, subunit J; K02142 F-type H+-transporting ATPase subunit j	NA	NA	biological_process:GO:0015986//ATP synthesis coupled proton transport;cellular_component:GO:0045263//proton-transporting ATP synthase complex, coupling factor F(o);GO:0016021//integral component of membrane;molecular_function:GO:0015078//hydrogen ion transmembrane transporter activity;
Unigene271_All	Unigene271_All	515.12	737.51	618.66	gi|573981215|ref|XP_006668528.1|/0/Metallophosphoesterase [Cordyceps militaris CM01] &gt;gi|346325445|gb|EGX95042.1| Metallophosphoesterase [Cordyceps militaris CM01]	gi|573981214|ref|XM_006668465.1|/0.0/Cordyceps militaris CM01 Metallophosphoesterase (CCM_03314), partial mRNA	sp|O42854|YFHH_SCHPO/5e-18/SH3 domain-containing protein C23A1.17 OS=Schizosaccharomyces pombe (strain 972 / ATCC 24843) GN=SPAC23A1.17 PE=1 SV=1	adl:AURDEDRAFT_87796/1e-21/PH domain-like protein; K05747 Wiskott-Aldrich syndrome protein	XF0818/5e-19/---	PF12850/7.9E-11/Calcineurin-like phosphoesterase superfamily domain	molecular_function:GO:0016787//hydrolase activity;
Unigene2896_All	Unigene2896_All	513.33	442.55	433.94	gi|573978428|ref|XP_006667159.1|/0/alcohol dehydrogenase, putative [Cordyceps militaris CM01] &gt;gi|346324076|gb|EGX93673.1| alcohol dehydrogenase, putative [Cordyceps militaris CM01]	gi|647401134|emb|LK052949.1|/2e-09/Rhodosporidium toruloides strain CECT1137, genomic scaffold, scaffold RHTO0S14	sp|P54006|TOXD_COCCA/1e-57/Protein TOXD OS=Cochliobolus carbonum GN=TOXD PE=3 SV=1	aor:AOR_1_492164/1e-40/AO090001000287; alcohol dehydrogenase; K15385 aspyridone synthetase trans-acting enoyl reductase	YCR102c/2e-26/---	PF08240/2.7E-8/Alcohol dehydrogenase GroES-like domain	biological_process:GO:0055114//oxidation-reduction process;molecular_function:GO:0008270//zinc ion binding;GO:0016491//oxidoreductase activity;
CL1293.Contig2_All	CL1293.Contig2_All	512.21	519	820.13	gi|813214636|dbj|GAO47198.1|/1.63602e-127/hypothetical protein G7K_1408-t1 [Saitoella complicata NRRL Y-17804]	gi|325145658|gb|JF429894.1|/0.0/Beauveria bassiana strain STB 28S-18S rRNA intergenic spacer, partial sequence; and 18S ribosomal RNA gene, internal transcribed spacer 1, 5.8S ribosomal RNA gene, internal transcribed spacer 2, and 28S ribosomal RNA gene, complete sequence	sp|Q8TGM6|TAR1_YEAST/5e-24/Protein TAR1 OS=Saccharomyces cerevisiae (strain ATCC 204508 / S288c) GN=TAR1 PE=2 SV=1	cmt:CCM_00167/9e-07/hemolysin-III channel protein Izh2; K07297 adiponectin receptor	NA	NA	NA
Unigene5251_All	Unigene5251_All	512.03	444.55	272.15	gi|573990035|ref|XP_006672938.1|/1.44716e-13/ABC multidrug transporter, putative [Cordyceps militaris CM01] &gt;gi|346319882|gb|EGX89483.1| ABC multidrug transporter, putative [Cordyceps militaris CM01]	gi|573990034|ref|XM_006672875.1|/6e-39/Cordyceps militaris CM01 ABC multidrug transporter, putative (CCM_07735), partial mRNA	NA	NA	NA	NA	NA
Unigene1603_All	Unigene1603_All	511.71	406.54	4.8	gi|573987511|ref|XP_006671676.1|/0/O-methyltransferase, putative [Cordyceps militaris CM01] &gt;gi|346320452|gb|EGX90052.1| O-methyltransferase, putative [Cordyceps militaris CM01]	gi|573987510|ref|XM_006671613.1|/0.0/Cordyceps militaris CM01 O-methyltransferase, putative (CCM_06472), partial mRNA	sp|Q9P900|OMTB_ASPFL/5e-11/Demethylsterigmatocystin 6-O-methyltransferase OS=Aspergillus flavus GN=omtB PE=3 SV=1	pcs:Pc18g03140/1e-14/Pc18g03140; K17649 demethylsterigmatocystin 6-O-methyltransferase [EC:2.1.1.109]	NA	PF00891/1.1E-21/O-methyltransferase	biological_process:GO:0032259//methylation;molecular_function:GO:0008171//O-methyltransferase activity;
Unigene8277_All	Unigene8277_All	509.23	515.64	423.81	gi|573992601|ref|XP_006674221.1|/0/peroxidase/catalase 2 [Cordyceps militaris CM01] &gt;gi|346319374|gb|EGX88976.1| peroxidase/catalase 2 [Cordyceps militaris CM01]	gi|573992600|ref|XM_006674158.1|/0.0/Cordyceps militaris CM01 peroxidase/catalase 2 (CCM_09023), partial mRNA	sp|A2Q7T1|KATG_ASPNC/0.0/Catalase-peroxidase OS=Aspergillus niger (strain CBS 513.88 / FGSC A1513) GN=katG PE=3 SV=1	cmt:CCM_09023/0.0/peroxidase/catalase 2; K03782 catalase-peroxidase [EC:1.11.1.21]	SMa2379/0.0/---	PR00460/2.5E-52/Bacterial haem catalase-peroxidase signature	biological_process:GO:0006979//response to oxidative stress;GO:0098869//cellular oxidant detoxification;GO:0042744//hydrogen peroxide catabolic process;GO:0055114//oxidation-reduction process;molecular_function:GO:0020037//heme binding;GO:0046872//metal ion binding;GO:0004096//catalase activity;
Unigene7724_All	Unigene7724_All	506.39	496.33	0.38	gi|914963727|ref|XP_013238560.1|/1.1778e-12/hypothetical protein DI09_207p20 [Mitosporidium daphniae] &gt;gi|692169647|gb|KGG52124.1| hypothetical protein DI09_207p20 [Mitosporidium daphniae]	NA	NA	NA	NA	PTHR16213/7.9E-12/--	NA
Unigene3876_All	Unigene3876_All	506.02	304.58	363.28	gi|573984533|ref|XP_006670187.1|/9.27706e-118/superoxide dismutase [Cordyceps militaris CM01] &gt;gi|346324006|gb|EGX93604.1| superoxide dismutase [Cordyceps militaris CM01]	gi|573984532|ref|XM_006670124.1|/0.0/Cordyceps militaris CM01 superoxide dismutase (CCM_04979), partial mRNA	sp|Q9Y783|SODM_NEUCR/7e-87/Superoxide dismutase [Mn], mitochondrial OS=Neurospora crassa (strain ATCC 24698 / 74-OR23-1A / CBS 708.71 / DSM 1257 / FGSC 987) GN=sod-2 PE=3 SV=1	cmt:CCM_04979/9e-119/superoxide dismutase; K04564 superoxide dismutase, Fe-Mn family [EC:1.15.1.1]	SPAC1486.01/2e-54/---	PS00088/-/Manganese and iron superoxide dismutases signature.	biological_process:GO:0019430//removal of superoxide radicals;GO:0055114//oxidation-reduction process;molecular_function:GO:0004784//superoxide dismutase activity;GO:0046872//metal ion binding;
Unigene1524_All	Unigene1524_All	505.16	537.97	539	gi|573981235|ref|XP_006668538.1|/1.89122e-178/transaldolase [Cordyceps militaris CM01] &gt;gi|346325455|gb|EGX95052.1| transaldolase [Cordyceps militaris CM01]	gi|573981234|ref|XM_006668475.1|/0.0/Cordyceps militaris CM01 transaldolase (CCM_03324), partial mRNA	sp|P34214|TAL1_KLULA/3e-119/Transaldolase OS=Kluyveromyces lactis (strain ATCC 8585 / CBS 2359 / DSM 70799 / NBRC 1267 / NRRL Y-1140 / WM37) GN=TAL1 PE=3 SV=3	cmt:CCM_03324/2e-179/transaldolase; K00616 transaldolase [EC:2.2.1.2]	SPCC1020.06c/8e-117/---	PTHR10683:SF6/8.0E-186/--	biological_process:GO:0006098//pentose-phosphate shunt;GO:0005975//carbohydrate metabolic process;cellular_component:GO:0005634//nucleus;GO:0005829//cytosol;molecular_function:GO:0004801//sedoheptulose-7-phosphate:D-glyceraldehyde-3-phosphate glyceronetransferase activity;
Unigene1059_All	Unigene1059_All	504.82	608.35	666.83	gi|699035063|emb|CEF85879.1|/6.81631e-52/unnamed protein product [Fusarium graminearum]	gi|573989462|ref|XM_006672589.1|/1e-168/Cordyceps militaris CM01 histone H4.1 (CCM_07448), partial mRNA	sp|P04914|H4_NEUCR/1e-52/Histone H4 OS=Neurospora crassa (strain ATCC 24698 / 74-OR23-1A / CBS 708.71 / DSM 1257 / FGSC 987) GN=hH4-1 PE=3 SV=2	cim:CIMG_03387/1e-51/histone H4; K11254 histone H4	SPBC1105.12/4e-49/---	PTHR10484/1.2E-93/--	biological_process:GO:0006334//nucleosome assembly;GO:0006352//DNA-templated transcription, initiation;cellular_component:GO:0005634//nucleus;GO:0000786//nucleosome;molecular_function:GO:0003677//DNA binding;GO:0046982//protein heterodimerization activity;
Unigene5231_All	Unigene5231_All	502.59	415.52	323.46	gi|667648795|ref|XP_008596229.1|/1.13684e-56/methionine aminopeptidase [Beauveria bassiana ARSEF 2860] &gt;gi|400600340|gb|EJP68014.1| methionine aminopeptidase [Beauveria bassiana ARSEF 2860]	NA	sp|P47179|DAN4_YEAST/2e-16/Cell wall protein DAN4 OS=Saccharomyces cerevisiae (strain ATCC 204508 / S288c) GN=DAN4 PE=2 SV=1	ttt:THITE_2111816/2e-13/glycoside hydrolase family 18 protein; K01183 chitinase [EC:3.2.1.14]	SSO3043/3e-06/---	NA	molecular_function:GO:0008233//peptidase activity;
Unigene6510_All	Unigene6510_All	502.36	435.17	584.97	gi|729186209|emb|CEJ84850.1|/4.23217e-45/Putative Acyl binding protein [Torrubiella hemipterigena]	gi|573982726|ref|XM_006669221.1|/4e-80/Cordyceps militaris CM01 Acyl-CoA-binding protein, ACBP (CCM_04073), partial mRNA	sp|P31787|ACBP_YEAST/3e-11/Acyl-CoA-binding protein OS=Saccharomyces cerevisiae (strain ATCC 204508 / S288c) GN=ACB1 PE=1 SV=3	tve:TRV_02977/7e-27/Acyl CoA binding protein family; K08762 diazepam-binding inhibitor (GABA receptor modulator, acyl-CoA-binding protein)	SPBC1539.06/4e-13/---	NA	cellular_component:GO:0005634//nucleus;GO:0005829//cytosol;molecular_function:GO:0000062//fatty-acyl-CoA binding;
Unigene6264_All	Unigene6264_All	498.13	581.6	660.68	gi|573982003|ref|XP_006668922.1|/0/G-patch DNA repair protein (Drt111), putative [Cordyceps militaris CM01] &gt;gi|346322740|gb|EGX92338.1| G-patch DNA repair protein (Drt111), putative [Cordyceps militaris CM01]	gi|573982000|ref|XM_006668858.1|/0.0/Cordyceps militaris CM01 GPI-anchored cell wall organization protein Ecm33 (CCM_03709), partial mRNA	sp|Q5AGC4|ECM33_CANAL/3e-38/Cell surface GPI-anchored protein ECM33 OS=Candida albicans (strain SC5314 / ATCC MYA-2876) GN=ECM331 PE=1 SV=1	maj:MAA_03028/1e-148/G-patch domain-containing protein; K12840 splicing factor 45	Rv3876/2e-08/---	SM00443/1.8E-8/glycine rich nucleic binding domain	biological_process:GO:0035556//intracellular signal transduction;cellular_component:GO:0009277//fungal-type cell wall;GO:0009986//cell surface;GO:0005829//cytosol;molecular_function:GO:0003676//nucleic acid binding;
Unigene636_All	Unigene636_All	490.34	339.05	291.46	gi|573979710|ref|XP_006667800.1|/0/hypothetical protein CCM_02585 [Cordyceps militaris CM01] &gt;gi|346324717|gb|EGX94314.1| hypothetical protein CCM_02585 [Cordyceps militaris CM01]	gi|699040812|emb|HG970332.1|/1e-15/Fusarium graminearum chromosome 1, complete genome	sp|Q10327|YD72_SCHPO/4e-73/Uncharacterized protein C32A11.02c OS=Schizosaccharomyces pombe (strain 972 / ATCC 24843) GN=SPAC32A11.02c PE=4 SV=1	sce:YIR019C/6e-31/FLO11, MUC1, STA4; Flo11p; K19851 flocculation protein FLO11	YDL140c/4e-07/---	PTHR31138:SF1/1.4E-290/--	molecular_function:GO:0008289//lipid binding;
CL226.Contig1_All	CL226.Contig1_All	488.91	560.46	688.32	gi|573977534|ref|XP_006666712.1|/0/sodium bile acid symporter [Cordyceps militaris CM01] &gt;gi|346327239|gb|EGX96835.1| sodium bile acid symporter [Cordyceps militaris CM01]	gi|573977533|ref|XM_006666649.1|/0.0/Cordyceps militaris CM01 sodium bile acid symporter (CCM_01493), partial mRNA	sp|Q05131|YMS4_YEAST/2e-50/Uncharacterized membrane protein YMR034C OS=Saccharomyces cerevisiae (strain ATCC 204508 / S288c) GN=YMR034C PE=1 SV=1	cmt:CCM_01493/0.0/sodium bile acid symporter; K14347 solute carrier family 10 (sodium/bile acid cotransporter), member 7	YMR034c/4e-50/---	PTHR18640/2.8E-101/--	biological_process:GO:0051603//proteolysis involved in cellular protein catabolic process;cellular_component:GO:0016021//integral component of membrane;GO:0005839//proteasome core complex;molecular_function:GO:0004298//threonine-type endopeptidase activity;
Unigene5812_All	Unigene5812_All	487.74	563.84	549.81	gi|573979060|ref|XP_006667475.1|/3.70372e-128/ATP synthase subunit 4 [Cordyceps militaris CM01] &gt;gi|346324392|gb|EGX93989.1| ATP synthase subunit 4 [Cordyceps militaris CM01]	gi|573979059|ref|XM_006667412.1|/0.0/Cordyceps militaris CM01 ATP synthase subunit 4 (CCM_02260), partial mRNA	sp|Q7SE71|ATPF_NEUCR/1e-100/ATP synthase subunit 4, mitochondrial OS=Neurospora crassa (strain ATCC 24698 / 74-OR23-1A / CBS 708.71 / DSM 1257 / FGSC 987) GN=atp-3 PE=3 SV=1	cmt:CCM_02260/4e-129/ATP synthase subunit 4; K02127 F-type H+-transporting ATPase subunit b	DR0479/9e-06/---	PTHR12733/4.5E-89/--	biological_process:GO:0015986//ATP synthesis coupled proton transport;GO:0035786//protein complex oligomerization;cellular_component:GO:0000274//mitochondrial proton-transporting ATP synthase, stator stalk;molecular_function:GO:0046961//proton-transporting ATPase activity, rotational mechanism;
Unigene2394_All	Unigene2394_All	484.68	498.52	593.01	gi|573992385|ref|XP_006674113.1|/1.79038e-180/WW/Rsp5/WWP [Cordyceps militaris CM01] &gt;gi|346319266|gb|EGX88868.1| WW/Rsp5/WWP [Cordyceps militaris CM01]	gi|573992384|ref|XM_006674050.1|/0.0/Cordyceps militaris CM01 WW/Rsp5/WWP (CCM_08914), partial mRNA	sp|O94426|YHK6_SCHPO/3e-17/WW domain-containing protein C660.06 OS=Schizosaccharomyces pombe (strain 972 / ATCC 24843) GN=SPBC660.06 PE=4 SV=1	ctp:CTRG_02005/2e-14/eukaryotic peptide chain release factor GTP-binding subunit; K03267 peptide chain release factor subunit 3	Cgl1939/3e-09/---	PS50020/13.634/WW/rsp5/WWP domain profile.	NA
Unigene7611_All	Unigene7611_All	484.45	525.06	473.51	gi|667652951|ref|XP_008598307.1|/0/aminotransferase class I and II [Beauveria bassiana ARSEF 2860] &gt;gi|400598300|gb|EJP66017.1| aminotransferase class I and II [Beauveria bassiana ARSEF 2860] &gt;gi|701772107|gb|KGQ06737.1| Aspartate aminotransferase [Beauveria bassiana D1-5]	gi|573978291|ref|XM_006667028.1|/0.0/Cordyceps militaris CM01 aminotransferase (CCM_01874), partial mRNA	sp|P08640|MUC1_YEAST/1e-17/Flocculation protein FLO11 OS=Saccharomyces cerevisiae (strain ATCC 204508 / S288c) GN=MUC1 PE=1 SV=2	sce:YIR019C/2e-16/FLO11, MUC1, STA4; Flo11p; K19851 flocculation protein FLO11	RSc0710/6e-28/---	PF00155/4.9E-36/Aminotransferase class I and II	biological_process:GO:0009058//biosynthetic process;molecular_function:GO:0008483//transaminase activity;GO:0030170//pyridoxal phosphate binding;
Unigene2192_All	Unigene2192_All	483.76	593.43	531.38	gi|573982795|ref|XP_006669318.1|/1.9656e-96/40S ribosomal protein S11 [Cordyceps militaris CM01] &gt;gi|346323136|gb|EGX92734.1| 40S ribosomal protein S11 [Cordyceps militaris CM01]	gi|667646488|ref|XM_008596854.1|/0.0/Beauveria bassiana ARSEF 2860 40S ribosomal protein S11 partial mRNA	sp|P0CX48|RS11B_YEAST/2e-66/40S ribosomal protein S11-B OS=Saccharomyces cerevisiae (strain ATCC 204508 / S288c) GN=RPS11B PE=1 SV=1	cmt:CCM_04107/2e-97/40S ribosomal protein S11; K02949 small subunit ribosomal protein S11e	YDR025w/5e-66/---	NA	biological_process:GO:0006412//translation;cellular_component:GO:0005840//ribosome;molecular_function:GO:0003735//structural constituent of ribosome;
Unigene2749_All	Unigene2749_All	481	482.84	474.23	gi|573977784|ref|XP_006666837.1|/2.23847e-86/translationally-controlled tumor protein [Cordyceps militaris CM01] &gt;gi|346327364|gb|EGX96960.1| translationally-controlled tumor protein [Cordyceps militaris CM01]	gi|573977783|ref|XM_006666774.1|/0.0/Cordyceps militaris CM01 translationally-controlled tumor protein (CCM_01619), partial mRNA	sp|Q4IJT5|TCTP_GIBZE/4e-70/Translationally-controlled tumor protein homolog OS=Gibberella zeae (strain PH-1 / ATCC MYA-4620 / FGSC 9075 / NRRL 31084) GN=FGSG_02523 PE=3 SV=1	ttt:THITE_2111816/6e-12/glycoside hydrolase family 18 protein; K01183 chitinase [EC:3.2.1.14]	NA	PTHR11991/3.7E-83/--	NA
Unigene5570_All	Unigene5570_All	475.56	485.83	592.72	gi|573987617|ref|XP_006671729.1|/2.64393e-73/Cytochrome c oxidase, subunit VIa [Cordyceps militaris CM01] &gt;gi|346320506|gb|EGX90106.1| Cytochrome c oxidase, subunit VIa [Cordyceps militaris CM01]	gi|573987616|ref|XM_006671666.1|/0.0/Cordyceps militaris CM01 Cytochrome c oxidase, subunit VIa (CCM_06525), partial mRNA	sp|O74471|COX13_SCHPO/4e-20/Cytochrome c oxidase subunit 6A, mitochondrial OS=Schizosaccharomyces pombe (strain 972 / ATCC 24843) GN=cox13 PE=3 SV=1	cmt:CCM_06525/3e-74/Cytochrome c oxidase, subunit VIa; K02266 cytochrome c oxidase subunit 6a	NA	NA	biological_process:GO:1902600//hydrogen ion transmembrane transport;cellular_component:GO:0016021//integral component of membrane;GO:0005751//mitochondrial respiratory chain complex IV;molecular_function:GO:0004129//cytochrome-c oxidase activity;
Unigene3536_All	Unigene3536_All	472.18	489.56	484.65	gi|573978064|ref|XP_006666977.1|/4.76026e-118/GTP-binding protein rho1, putative [Cordyceps militaris CM01] &gt;gi|346327504|gb|EGX97100.1| GTP-binding protein rho1, putative [Cordyceps militaris CM01]	gi|148475341|dbj|AB218425.1|/0.0/Cordyceps militaris mRNA for Rho1, complete cds	sp|Q9C3Y4|RHOA_EMENI/1e-97/GTP-binding protein rhoA OS=Emericella nidulans (strain FGSC A4 / ATCC 38163 / CBS 112.46 / NRRL 194 / M139) GN=rhoA PE=3 SV=1	mgr:MGG_07176/6e-100/GTP-binding protein rhoA; K04513 Ras homolog gene family, member A	SPAC16.01/2e-58/---	PTHR24072/1.7E-127/--	biological_process:GO:0007264//small GTPase mediated signal transduction;cellular_component:GO:0005622//intracellular;molecular_function:GO:0005525//GTP binding;
Unigene6337_All	Unigene6337_All	471.86	368.85	149.8	gi|573992945|ref|XP_006674393.1|/2.13471e-74/hypothetical protein CCM_09196 [Cordyceps militaris CM01] &gt;gi|346318457|gb|EGX88060.1| hypothetical protein CCM_09196 [Cordyceps militaris CM01]	gi|573992944|ref|XM_006674330.1|/0.0/Cordyceps militaris CM01 hypothetical protein (CCM_09196), partial mRNA	sp|A2QBZ0|SEC31_ASPNC/7e-06/Protein transport protein sec31 OS=Aspergillus niger (strain CBS 513.88 / FGSC A1513) GN=sec31 PE=3 SV=1	hir:HETIRDRAFT_416565/7e-07/hypothetical protein; K05747 Wiskott-Aldrich syndrome protein	NA	NA	NA
Unigene5489_All	Unigene5489_All	465.32	396.31	127.2	gi|573977258|ref|XP_006666574.1|/7.25049e-152/ribonuclease M [Cordyceps militaris CM01] &gt;gi|346327101|gb|EGX96697.1| ribonuclease M [Cordyceps militaris CM01]	gi|573977257|ref|XM_006666511.1|/0.0/Cordyceps militaris CM01 ribonuclease M (CCM_01355), partial mRNA	sp|P24657|RNTR_HYPRU/8e-104/Ribonuclease Trv OS=Hypocrea rufa PE=1 SV=1	cmt:CCM_01355/7e-153/ribonuclease M; K01166 ribonuclease T2 [EC:3.1.27.1]	DR2133/1e-07/---	NA	biological_process:GO:0090502//RNA phosphodiester bond hydrolysis, endonucleolytic;molecular_function:GO:0003723//RNA binding;GO:0033897//ribonuclease T2 activity;
Unigene2855_All	Unigene2855_All	462.54	508.89	418.65	gi|573984933|ref|XP_006670387.1|/5.92756e-112/40S ribosomal protein S8 [Cordyceps militaris CM01] &gt;gi|346321423|gb|EGX91022.1| 40S ribosomal protein S8 [Cordyceps militaris CM01]	gi|573984932|ref|XM_006670324.1|/0.0/Cordyceps militaris CM01 40S ribosomal protein S8 (CCM_05179), partial mRNA	sp|P0CX40|RS8B_YEAST/1e-78/40S ribosomal protein S8-B OS=Saccharomyces cerevisiae (strain ATCC 204508 / S288c) GN=RPS8B PE=1 SV=1	cmt:CCM_05179/6e-113/40S ribosomal protein S8; K02995 small subunit ribosomal protein S8e	YER102w/3e-78/---	NA	biological_process:GO:0006412//translation;cellular_component:GO:0005840//ribosome;molecular_function:GO:0003735//structural constituent of ribosome;
Unigene6048_All	Unigene6048_All	461.28	507.75	686.95	gi|573992141|ref|XP_006673991.1|/0/Bicupin, oxalate decarboxylase/oxidase [Cordyceps militaris CM01] &gt;gi|346319144|gb|EGX88746.1| Bicupin, oxalate decarboxylase/oxidase [Cordyceps militaris CM01]	gi|573992140|ref|XM_006673928.1|/0.0/Cordyceps militaris CM01 Bicupin, oxalate decarboxylase/oxidase (CCM_08792), partial mRNA	sp|P08640|MUC1_YEAST/2e-16/Flocculation protein FLO11 OS=Saccharomyces cerevisiae (strain ATCC 204508 / S288c) GN=MUC1 PE=1 SV=2	sce:YIR019C/2e-15/FLO11, MUC1, STA4; Flo11p; K19851 flocculation protein FLO11	BS_yvrK/3e-90/---	PF00190/2.2E-10/Cupin	biological_process:GO:0033609//oxalate metabolic process;molecular_function:GO:0045735//nutrient reservoir activity;
CL45.Contig2_All	CL45.Contig2_All	460.67	545.46	486.58	gi|632916369|gb|KDB15905.1|/1.17825e-69/polyubiquitin [Ustilaginoidea virens]	gi|573980490|ref|XM_006668112.1|/1e-180/Cordyceps militaris CM01 ubiquitin fusion protein (CCM_02960), partial mRNA	sp|P0C224|RL40_NEUCR/1e-68/Ubiquitin-60S ribosomal protein L40 OS=Neurospora crassa (strain ATCC 24698 / 74-OR23-1A / CBS 708.71 / DSM 1257 / FGSC 987) GN=crp-79 PE=1 SV=2	cmt:CCM_02960/5e-68/ubiquitin fusion protein; K02927 large subunit ribosomal protein L40e	YLL039c/9e-37/---	PF01020/1.0E-29/Ribosomal L40e family	biological_process:GO:0006412//translation;cellular_component:GO:0005840//ribosome;molecular_function:GO:0003735//structural constituent of ribosome;
Unigene2862_All	Unigene2862_All	456.67	519.71	480.04	gi|667649665|ref|XP_008596664.1|/4.7105e-67/40S ribosomal protein S24 [Beauveria bassiana ARSEF 2860] &gt;gi|400599874|gb|EJP67565.1| 40S ribosomal protein S24 [Beauveria bassiana ARSEF 2860] &gt;gi|701775679|gb|KGQ09698.1| 40S ribosomal protein S24-A [Beauveria bassiana D1-5]	gi|573993846|ref|XM_006674781.1|/0.0/Cordyceps militaris CM01 40S ribosomal protein S24 (CCM_09648), partial mRNA	sp|O13784|RS24A_SCHPO/9e-40/40S ribosomal protein S24-A OS=Schizosaccharomyces pombe (strain 972 / ATCC 24843) GN=rps24a PE=3 SV=3	cmt:CCM_09648/1e-65/40S ribosomal protein S24; K02974 small subunit ribosomal protein S24e	SPAC17G6.06/2e-39/---	PF01282/3.5E-31/Ribosomal protein S24e	biological_process:GO:0006412//translation;cellular_component:GO:0005840//ribosome;molecular_function:GO:0000166//nucleotide binding;GO:0003735//structural constituent of ribosome;
Unigene7196_All	Unigene7196_All	454.71	318.2	373.49	gi|573993115|ref|XP_006674478.1|/2.49367e-92/hypothetical protein CCM_09281 [Cordyceps militaris CM01] &gt;gi|346318542|gb|EGX88145.1| hypothetical protein CCM_09281 [Cordyceps militaris CM01]	gi|667647242|ref|XM_008597231.1|/2e-98/Beauveria bassiana ARSEF 2860 DUF985 domain protein partial mRNA	sp|O42854|YFHH_SCHPO/9e-16/SH3 domain-containing protein C23A1.17 OS=Schizosaccharomyces pombe (strain 972 / ATCC 24843) GN=SPAC23A1.17 PE=1 SV=1	maj:MAA_08781/3e-68/DUF985 domain protein; K09705 uncharacterized protein	mlr3548/2e-38/---	PF06172/1.6E-40/Cupin superfamily (DUF985)	NA
Unigene4344_All	Unigene4344_All	454.1	492.11	577.38	gi|573993813|ref|XP_006674827.1|/1.60075e-25/hypothetical protein CCM_09631 [Cordyceps militaris CM01] &gt;gi|346318065|gb|EGX87670.1| hypothetical protein CCM_09631 [Cordyceps militaris CM01]	gi|573993812|ref|XM_006674764.1|/6e-92/Cordyceps militaris CM01 hypothetical protein (CCM_09631), partial mRNA	NA	NA	NA	NA	cellular_component:GO:0016021//integral component of membrane;
Unigene2871_All	Unigene2871_All	453.08	456.47	430.09	gi|573983553|ref|XP_006669697.1|/4.92841e-58/nuclear transport factor 2 [Cordyceps militaris CM01] &gt;gi|346323516|gb|EGX93114.1| nuclear transport factor 2 [Cordyceps militaris CM01]	gi|573983552|ref|XM_006669634.1|/0.0/Cordyceps militaris CM01 nuclear transport factor 2 (CCM_04486), partial mRNA	sp|Q96VN3|NTF2_EMENI/6e-40/Nuclear transport factor 2 OS=Emericella nidulans (strain FGSC A4 / ATCC 38163 / CBS 112.46 / NRRL 194 / M139) GN=ntf2 PE=3 SV=1	NA	NA	PS50177/31.312/Nuclear transport factor 2 domain profile.	biological_process:GO:0006606//protein import into nucleus;cellular_component:GO:0005635//nuclear envelope;
Unigene6746_All	Unigene6746_All	450.68	596.43	509.58	gi|573982825|ref|XP_006669333.1|/0/GPI-anchored cell wall beta-1,3-endoglucanase EglC [Cordyceps militaris CM01] &gt;gi|346323151|gb|EGX92749.1| GPI-anchored cell wall beta-1,3-endoglucanase EglC [Cordyceps militaris CM01]	gi|573982824|ref|XM_006669270.1|/0.0/Cordyceps militaris CM01 GPI-anchored cell wall beta-1,3-endoglucanase EglC (CCM_04122), partial mRNA	sp|Q5AUT0|EGLC_EMENI/5e-104/Probable glucan endo-1,3-beta-glucosidase eglC OS=Emericella nidulans (strain FGSC A4 / ATCC 38163 / CBS 112.46 / NRRL 194 / M139) GN=eglC PE=1 SV=1	cmt:CCM_04122/0.0/GPI-anchored cell wall beta-1,3-endoglucanase EglC; K01199 glucan endo-1,3-beta-D-glucosidase [EC:3.2.1.39]	YGR282c/5e-16/---	PTHR16631:SF10/5.5E-133/--	biological_process:GO:0005975//carbohydrate metabolic process;molecular_function:GO:0004553//hydrolase activity, hydrolyzing O-glycosyl compounds;
Unigene7255_All	Unigene7255_All	449.96	336.93	186.38	gi|573979164|ref|XP_006667527.1|/3.46144e-180/peroxisomal dehydratase [Cordyceps militaris CM01] &gt;gi|346324444|gb|EGX94041.1| peroxisomal dehydratase [Cordyceps militaris CM01]	gi|573979163|ref|XM_006667464.1|/0.0/Cordyceps militaris CM01 peroxisomal dehydratase (CCM_02312), partial mRNA	sp|Q01373|FOX2_NEUCR/1e-27/Peroxisomal hydratase-dehydrogenase-epimerase OS=Neurospora crassa (strain ATCC 24698 / 74-OR23-1A / CBS 708.71 / DSM 1257 / FGSC 987) GN=fox-2 PE=1 SV=1	adl:AURDEDRAFT_161278/2e-33/multifunctional beta-oxidation protein; K14729 multifunctional beta-oxidation protein [EC:4.2.1.- 1.1.1.-]	PA1018/1e-26/---	PF01575/2.5E-22/MaoC like domain	NA
Unigene4738_All	Unigene4738_All	449.5	549.6	472.02	gi|573976618|ref|XP_006666254.1|/1.33968e-95/60S ribosomal protein L20 [Cordyceps militaris CM01] &gt;gi|346326781|gb|EGX96377.1| 60S ribosomal protein L20 [Cordyceps militaris CM01]	gi|573976617|ref|XM_006666191.1|/0.0/Cordyceps militaris CM01 60S ribosomal protein L20 (CCM_01033), partial mRNA	sp|P0CX24|RL20B_YEAST/7e-64/60S ribosomal protein L20-B OS=Saccharomyces cerevisiae (strain ATCC 204508 / S288c) GN=RPL20B PE=1 SV=1	cmt:CCM_01033/1e-96/60S ribosomal protein L20; K02882 large subunit ribosomal protein L18Ae	YMR242c/3e-63/---	NA	biological_process:GO:0006412//translation;cellular_component:GO:0005840//ribosome;molecular_function:GO:0003735//structural constituent of ribosome;
Unigene3886_All	Unigene3886_All	446.99	474.39	479.55	gi|701774276|gb|KGQ08562.1|/6.33445e-73/Cofilin [Beauveria bassiana D1-5]	gi|615434218|ref|XM_007589681.1|/1e-89/Colletotrichum fioriniae PJ7 chaperonin GroL mRNA	sp|Q4I963|COFI_GIBZE/4e-70/Cofilin OS=Gibberella zeae (strain PH-1 / ATCC MYA-4620 / FGSC 9075 / NRRL 31084) GN=COF1 PE=3 SV=2	vda:VDAG_08897/1e-69/cofilin; K05765 cofilin	NA	NA	biological_process:GO:0030042//actin filament depolymerization;GO:0045041//protein import into mitochondrial intermembrane space;GO:0006458//'de novo' protein folding;GO:0051131//chaperone-mediated protein complex assembly;GO:0051604//protein maturation;GO:0042026//protein refolding;GO:0050821//protein stabilization;cellular_component:GO:0042645//mitochondrial nucleoid;GO:0015629//actin cytoskele…
Unigene1171_All	Unigene1171_All	442.81	524.87	391.92	gi|573987351|ref|XP_006671596.1|/0/60S acidic ribosomal protein P0 [Cordyceps militaris CM01] &gt;gi|346322633|gb|EGX92232.1| 60S acidic ribosomal protein P0 [Cordyceps militaris CM01]	gi|573987350|ref|XM_006671533.1|/0.0/Cordyceps militaris CM01 60S acidic ribosomal protein P0 (CCM_06393), partial mRNA	sp|Q96TJ5|RLA0_NEUCR/2e-140/60S acidic ribosomal protein P0 OS=Neurospora crassa (strain ATCC 24698 / 74-OR23-1A / CBS 708.71 / DSM 1257 / FGSC 987) GN=p0 PE=2 SV=1	cmt:CCM_06393/0.0/60S acidic ribosomal protein P0; K02941 large subunit ribosomal protein LP0	YLR340w/6e-113/---	NA	biological_process:GO:0002181//cytoplasmic translation;GO:0000027//ribosomal large subunit assembly;cellular_component:GO:0022625//cytosolic large ribosomal subunit;molecular_function:GO:0003735//structural constituent of ribosome;GO:0070180//large ribosomal subunit rRNA binding;
Unigene8470_All	Unigene8470_All	442.75	420.96	381	gi|953394986|ref|XP_014541735.1|/5.856e-79/Translation initiation factor 1A (eIF-1A), partial [Metarhizium brunneum ARSEF 3297] &gt;gi|743641178|gb|KID72530.1| Translation initiation factor 1A (eIF-1A), partial [Metarhizium brunneum ARSEF 3297]	gi|667658480|ref|XM_008602850.1|/1e-170/Beauveria bassiana ARSEF 2860 eukaryotic translation initiation factor eIF-1A partial mRNA	sp|P55877|IF1A_SCHPO/6e-55/Eukaryotic translation initiation factor 1A OS=Schizosaccharomyces pombe (strain 972 / ATCC 24843) GN=tif11 PE=2 SV=2	maj:MAA_03847/2e-79/Translation initiation factor 1A (eIF-1A); K03236 translation initiation factor 1A	SPBC25H2.07/1e-54/---	PS50832/32.315/S1 domain IF1 type profile.	biological_process:GO:0006413//translational initiation;cellular_component:GO:0005634//nucleus;GO:0005829//cytosol;molecular_function:GO:0003743//translation initiation factor activity;GO:0033592//RNA strand annealing activity;
CL392.Contig1_All	CL392.Contig1_All	440.37	492.11	445.89	gi|573986355|ref|XP_006671098.1|/2.86402e-101/ADP-ribosylation factor [Cordyceps militaris CM01] &gt;gi|667646123|ref|XP_008594893.1| ADP-ribosylation factor family protein [Beauveria bassiana ARSEF 2860] &gt;gi|346322134|gb|EGX91733.1| ADP-ribosylation factor [Cordyceps militaris CM01] &gt;gi|400601984|gb|EJP69609.1| ADP-ribosylation factor family protein [Beauveria bassiana ARSEF 2860] &gt;gi|7…	gi|573986354|ref|XM_006671035.1|/0.0/Cordyceps militaris CM01 ADP-ribosylation factor (CCM_05891), partial mRNA	sp|P34727|ARF_AJECA/2e-94/ADP-ribosylation factor OS=Ajellomyces capsulatus GN=ARF PE=1 SV=3	cmt:CCM_05891/3e-102/ADP-ribosylation factor; K07937 ADP-ribosylation factor 1	YDL137w/3e-80/---	NA	biological_process:GO:0007264//small GTPase mediated signal transduction;cellular_component:GO:0005622//intracellular;molecular_function:GO:0005525//GTP binding;
Unigene459_All	Unigene459_All	436.9	636.62	609.81	gi|573991149|ref|XP_006673495.1|/8.98489e-31/hypothetical protein CCM_08293 [Cordyceps militaris CM01] &gt;gi|346318648|gb|EGX88250.1| hypothetical protein CCM_08293 [Cordyceps militaris CM01]	gi|573991148|ref|XM_006673432.1|/1e-115/Cordyceps militaris CM01 hypothetical protein (CCM_08293), partial mRNA	NA	NA	NA	NA	NA
Unigene2930_All	Unigene2930_All	436.42	498.99	499.96	gi|701775423|gb|KGQ09490.1|/1.472e-122/peroxiredoxin PRX1 [Beauveria bassiana D1-5]	gi|667644176|ref|XM_008595698.1|/0.0/Beauveria bassiana ARSEF 2860 mitochondrial peroxiredoxin PRX1 partial mRNA	sp|P34227|PRX1_YEAST/7e-70/Mitochondrial peroxiredoxin PRX1 OS=Saccharomyces cerevisiae (strain ATCC 204508 / S288c) GN=PRX1 PE=1 SV=1	ssl:SS1G_02121/7e-78/mitochondrial peroxiredoxin PRX1; K03386 peroxiredoxin (alkyl hydroperoxide reductase subunit C) [EC:1.11.1.15]	YBL064c/2e-69/---	NA	biological_process:GO:0098869//cellular oxidant detoxification;GO:0055114//oxidation-reduction process;molecular_function:GO:0051920//peroxiredoxin activity;
Unigene3960_All	Unigene3960_All	434.71	441.54	473.1	gi|573979196|ref|XP_006667543.1|/0/cutinase G-box binding protein [Cordyceps militaris CM01] &gt;gi|346324460|gb|EGX94057.1| cutinase G-box binding protein [Cordyceps militaris CM01]	gi|573979195|ref|XM_006667480.1|/0.0/Cordyceps militaris CM01 cutinase G-box binding protein (CCM_02328), partial mRNA	sp|P39959|YEW0_YEAST/1e-21/Zinc finger protein YER130C OS=Saccharomyces cerevisiae (strain ATCC 204508 / S288c) GN=YER130C PE=4 SV=2	lth:KLTH0D08734g/8e-18/KLTH0D08734p; K09468 zinc finger protein MSN2/4	SPAC3H1.11/2e-15/---	PS50157/14.648/Zinc finger C2H2 type domain profile.	molecular_function:GO:0046872//metal ion binding;GO:0043565//sequence-specific DNA binding;
Unigene7244_All	Unigene7244_All	434.4	530.78	384.93	gi|573984233|ref|XP_006670037.1|/2.8343e-115/60S ribosomal protein L15 [Cordyceps militaris CM01] &gt;gi|346323856|gb|EGX93454.1| 60S ribosomal protein L15 [Cordyceps militaris CM01]	gi|573984232|ref|XM_006669974.1|/0.0/Cordyceps militaris CM01 60S ribosomal protein L15 (CCM_04828), partial mRNA	sp|Q8X034|RL15_NEUCR/1e-110/60S ribosomal protein L15 OS=Neurospora crassa (strain ATCC 24698 / 74-OR23-1A / CBS 708.71 / DSM 1257 / FGSC 987) GN=rpl-15 PE=3 SV=1	cmt:CCM_04828/3e-116/60S ribosomal protein L15; K02877 large subunit ribosomal protein L15e	YLR029c/4e-99/---	NA	biological_process:GO:0006412//translation;cellular_component:GO:0005840//ribosome;molecular_function:GO:0003735//structural constituent of ribosome;
Unigene7066_All	Unigene7066_All	432.71	535	162.85	gi|573978128|ref|XP_006667009.1|/0/copper radical oxidase [Cordyceps militaris CM01] &gt;gi|346327536|gb|EGX97132.1| copper radical oxidase [Cordyceps militaris CM01]	gi|573978127|ref|XM_006666946.1|/0.0/Cordyceps militaris CM01 copper radical oxidase (CCM_01791), partial mRNA	sp|P47179|DAN4_YEAST/9e-31/Cell wall protein DAN4 OS=Saccharomyces cerevisiae (strain ATCC 204508 / S288c) GN=DAN4 PE=2 SV=1	ttt:THITE_2111816/3e-28/glycoside hydrolase family 18 protein; K01183 chitinase [EC:3.2.1.14]	YGL028c/1e-13/---	NA	NA
Unigene6178_All	Unigene6178_All	432.19	250.28	243.01	gi|573993761|ref|XP_006674801.1|/0/ICE2 family protein [Cordyceps militaris CM01] &gt;gi|346318039|gb|EGX87644.1| ICE2 family protein [Cordyceps militaris CM01]	gi|573993760|ref|XM_006674738.1|/0.0/Cordyceps militaris CM01 ICE2 family protein (CCM_09605), partial mRNA	sp|O13909|YDW1_SCHPO/2e-50/Uncharacterized protein C23C11.01 OS=Schizosaccharomyces pombe (strain 972 / ATCC 24843) GN=SPAC23C11.01 PE=4 SV=1	sce:YIR019C/4e-25/FLO11, MUC1, STA4; Flo11p; K19851 flocculation protein FLO11	SPBC28F2.12/1e-09/---	PTHR31726/1.4E-139/--	biological_process:GO:0036228//protein targeting to nuclear inner membrane;GO:0048309//endoplasmic reticulum inheritance;GO:0006882//cellular zinc ion homeostasis;GO:0000921//septin ring assembly;cellular_component:GO:0097038//perinuclear endoplasmic reticulum;GO:0032541//cortical endoplasmic reticulum;GO:0030176//integral component of endoplasmic reticulum membrane;
Unigene2595_All	Unigene2595_All	428.33	308.92	759.35	gi|573993299|ref|XP_006674570.1|/1.30055e-122/expression library immunization antigen 1 [Cordyceps militaris CM01] &gt;gi|346318147|gb|EGX87751.1| expression library immunization antigen 1 [Cordyceps militaris CM01]	gi|573993298|ref|XM_006674507.1|/0.0/Cordyceps militaris CM01 expression library immunization antigen 1 (CCM_09373), partial mRNA	sp|O36027|WSP1_SCHPO/3e-15/Wiskott-Aldrich syndrome protein homolog 1 OS=Schizosaccharomyces pombe (strain 972 / ATCC 24843) GN=wsp1 PE=1 SV=3	aor:AOR_1_236094/1e-15/AO090120000140; actin associated protein Wsp1; K05747 Wiskott-Aldrich syndrome protein	Rv3876/5e-10/---	NA	NA
Unigene218_All	Unigene218_All	425.92	383.96	366.52	gi|573979072|ref|XP_006667481.1|/0/acid phosphatase [Cordyceps militaris CM01] &gt;gi|346324398|gb|EGX93995.1| acid phosphatase [Cordyceps militaris CM01]	gi|573979071|ref|XM_006667418.1|/0.0/Cordyceps militaris CM01 acid phosphatase (CCM_02266), partial mRNA	sp|P08540|PHOX_KLULA/3e-94/Probable acid phosphatase OS=Kluyveromyces lactis (strain ATCC 8585 / CBS 2359 / DSM 70799 / NBRC 1267 / NRRL Y-1140 / WM37) GN=KLLA0B14839g PE=4 SV=2	lbc:LACBIDRAFT_310810/6e-102/acid phosphatase; K01078 acid phosphatase [EC:3.1.3.2]	YPO2725/5e-11/---	PF04185/5.7E-33/Phosphoesterase family	molecular_function:GO:0016788//hydrolase activity, acting on ester bonds;
Unigene1338_All	Unigene1338_All	422.01	256.63	341.6	gi|573975104|ref|XP_006665497.1|/1.89394e-36/pantothenate transporter liz1 [Cordyceps militaris CM01] &gt;gi|346326024|gb|EGX95620.1| pantothenate transporter liz1 [Cordyceps militaris CM01]	gi|573975103|ref|XM_006665434.1|/1e-128/Cordyceps militaris CM01 pantothenate transporter liz1 (CCM_00274), partial mRNA	NA	NA	NA	NA	biological_process:GO:0055085//transmembrane transport;cellular_component:GO:0016021//integral component of membrane;
Unigene3690_All	Unigene3690_All	420.33	387.19	508.29	gi|701770482|gb|KGQ05428.1|/4.04439e-91/Transport protein particle 20 kDa subunit [Beauveria bassiana D1-5]	gi|667647512|ref|XM_008597366.1|/1e-169/Beauveria bassiana ARSEF 2860 trafficking protein particle complex subunit 2 partial mRNA	sp|P04914|H4_NEUCR/2e-52/Histone H4 OS=Neurospora crassa (strain ATCC 24698 / 74-OR23-1A / CBS 708.71 / DSM 1257 / FGSC 987) GN=hH4-1 PE=3 SV=2	tre:TRIREDRAFT_4947/1e-81/cis-Golgi transport protein particle complex 20 kDa subunit; K20301 trafficking protein particle complex subunit 2	SPBC1105.12/7e-49/---	PF04628/1.2E-40/Sedlin, N-terminal conserved region	biological_process:GO:0006888//ER to Golgi vesicle-mediated transport;GO:0006461//protein complex assembly;cellular_component:GO:1990072//TRAPPIII protein complex;GO:1990071//TRAPPII protein complex;GO:1990070//TRAPPI protein complex;molecular_function:GO:0042802//identical protein binding;
Unigene4818_All	Unigene4818_All	419.57	204.57	45.8	gi|573991441|ref|XP_006673641.1|/0/Ferric reductase-like transmembrane component [Cordyceps militaris CM01] &gt;gi|346318794|gb|EGX88396.1| Ferric reductase-like transmembrane component [Cordyceps militaris CM01]	gi|573991440|ref|XM_006673578.1|/0.0/Cordyceps militaris CM01 Ferric reductase-like transmembrane component (CCM_08439), partial mRNA	sp|P36033|FRE2_YEAST/4e-25/Ferric/cupric reductase transmembrane component 2 OS=Saccharomyces cerevisiae (strain ATCC 204508 / S288c) GN=FRE2 PE=1 SV=1	cpw:CPC735_011850/6e-28/Ferric reductase like transmembrane component family protein; K00521 ferric-chelate reductase [EC:1.16.1.7]	NA	PTHR11972:SF43/2.3E-110/--	biological_process:GO:0055114//oxidation-reduction process;cellular_component:GO:0016021//integral component of membrane;molecular_function:GO:0016491//oxidoreductase activity;
CL679.Contig1_All	CL679.Contig1_All	418.13	472.59	420.75	gi|667654013|ref|XP_008598838.1|/9.79941e-136/ribosomal protein S6e [Beauveria bassiana ARSEF 2860] &gt;gi|400597926|gb|EJP65650.1| ribosomal protein S6e [Beauveria bassiana ARSEF 2860]	gi|573984938|ref|XM_006670327.1|/0.0/Cordyceps militaris CM01 40S ribosomal protein S6 (CCM_05182), partial mRNA	sp|Q9C0Z7|RS6B_SCHPO/7e-103/40S ribosomal protein S6-B OS=Schizosaccharomyces pombe (strain 972 / ATCC 24843) GN=rps6b PE=1 SV=1	cmt:CCM_05182/1e-132/40S ribosomal protein S6; K02991 small subunit ribosomal protein S6e	SPAPB1E7.12/2e-102/---	PS00578/-/Ribosomal protein S6e signature.	biological_process:GO:0006412//translation;cellular_component:GO:0005840//ribosome;molecular_function:GO:0003735//structural constituent of ribosome;
Unigene725_All	Unigene725_All	417.87	503.44	292.69	gi|573988465|ref|XP_006672153.1|/0/protein disulfide-isomerase [Cordyceps militaris CM01] &gt;gi|346320932|gb|EGX90532.1| protein disulfide-isomerase [Cordyceps militaris CM01]	gi|573988464|ref|XM_006672090.1|/0.0/Cordyceps militaris CM01 protein disulfide-isomerase (CCM_06952), partial mRNA	sp|P55059|PDI_HUMIN/0.0/Protein disulfide-isomerase OS=Humicola insolens PE=1 SV=1	cmt:CCM_06952/0.0/protein disulfide-isomerase; K09580 protein disulfide-isomerase A1 [EC:5.3.4.1]	SPAC1F5.02/6e-102/---	PS51352/16.519/Thioredoxin domain profile.	biological_process:GO:0045454//cell redox homeostasis;cellular_component:GO:0005783//endoplasmic reticulum;molecular_function:GO:0003756//protein disulfide isomerase activity;
Unigene8210_All	Unigene8210_All	413.89	422.83	403.59	gi|701770978|gb|KGQ05861.1|/3.79285e-78/Calmodulin [Beauveria bassiana D1-5]	gi|573982516|ref|XM_006669116.1|/0.0/Cordyceps militaris CM01 calmodulin (CCM_03968), partial mRNA	sp|P61859|CALM_NEUCR/1e-78/Calmodulin OS=Neurospora crassa (strain ATCC 24698 / 74-OR23-1A / CBS 708.71 / DSM 1257 / FGSC 987) GN=cmd-1 PE=1 SV=2	cmt:CCM_03968/5e-79/calmodulin; K02183 calmodulin	SPAC3A12.14/5e-55/---	PS00018/-/EF-hand calcium-binding domain.	molecular_function:GO:0005509//calcium ion binding;
Unigene3480_All	Unigene3480_All	412.6	383.1	210.9	gi|573978368|ref|XP_006667129.1|/0/catalase/peroxidase HPI [Cordyceps militaris CM01] &gt;gi|346327656|gb|EGX97252.1| catalase/peroxidase HPI [Cordyceps militaris CM01]	gi|573978367|ref|XM_006667066.1|/0.0/Cordyceps militaris CM01 catalase/peroxidase HPI (CCM_01912), partial mRNA	sp|A4QUT2|KATG2_MAGO7/0.0/Catalase-peroxidase 2 OS=Magnaporthe oryzae (strain 70-15 / ATCC MYA-4617 / FGSC 8958) GN=KATG2 PE=1 SV=1	cmt:CCM_01912/0.0/catalase/peroxidase HPI; K03782 catalase-peroxidase [EC:1.11.1.21]	MA0972/0.0/---	PF00141/1.6E-32/Peroxidase	biological_process:GO:0006979//response to oxidative stress;GO:0098869//cellular oxidant detoxification;GO:0042744//hydrogen peroxide catabolic process;GO:0055114//oxidation-reduction process;molecular_function:GO:0020037//heme binding;GO:0046872//metal ion binding;GO:0004096//catalase activity;
Unigene692_All	Unigene692_All	410.04	310.09	204.3	gi|573982985|ref|XP_006669413.1|/5.38578e-160/hypothetical protein CCM_04202 [Cordyceps militaris CM01] &gt;gi|346323232|gb|EGX92830.1| hypothetical protein CCM_04202 [Cordyceps militaris CM01]	gi|667653398|ref|XM_008600309.1|/0.0/Beauveria bassiana ARSEF 2860 ATP synthase F0 partial mRNA	sp|P08640|MUC1_YEAST/3e-21/Flocculation protein FLO11 OS=Saccharomyces cerevisiae (strain ATCC 204508 / S288c) GN=MUC1 PE=1 SV=2	sce:YIR019C/4e-20/FLO11, MUC1, STA4; Flo11p; K19851 flocculation protein FLO11	SPBC28F2.12/1e-12/---	NA	biological_process:GO:0006633//fatty acid biosynthetic process;cellular_component:GO:0016021//integral component of membrane;molecular_function:GO:0000287//magnesium ion binding;GO:0008897//holo-[acyl-carrier-protein] synthase activity;
Unigene5375_All	Unigene5375_All	405.39	410.47	486.47	gi|573986195|ref|XP_006671018.1|/1.24313e-28/60S ribosomal protein L29 [Cordyceps militaris CM01] &gt;gi|346322054|gb|EGX91653.1| 60S ribosomal protein L29 [Cordyceps militaris CM01]	gi|573986194|ref|XM_006670955.1|/2e-99/Cordyceps militaris CM01 60S ribosomal protein L29 (CCM_05811), partial mRNA	sp|P05747|RL29_YEAST/2e-22/60S ribosomal protein L29 OS=Saccharomyces cerevisiae (strain ATCC 204508 / S288c) GN=RPL29 PE=1 SV=3	cmt:CCM_05811/1e-29/60S ribosomal protein L29; K02905 large subunit ribosomal protein L29e	NA	NA	biological_process:GO:0002181//cytoplasmic translation;cellular_component:GO:0022625//cytosolic large ribosomal subunit;molecular_function:GO:0003735//structural constituent of ribosome;
Unigene7312_All	Unigene7312_All	403.47	441.74	221.28	gi|573989343|ref|XP_006672592.1|/4.56937e-18/hypothetical protein CCM_07388 [Cordyceps militaris CM01] &gt;gi|346319535|gb|EGX89136.1| hypothetical protein CCM_07388 [Cordyceps militaris CM01]	gi|573989342|ref|XM_006672529.1|/5e-73/Cordyceps militaris CM01 hypothetical protein (CCM_07388), partial mRNA	NA	NA	NA	NA	NA
Unigene1267_All	Unigene1267_All	402.68	263.98	606.08	gi|573976092|ref|XP_006665991.1|/7.44533e-40/hypothetical protein CCM_00769 [Cordyceps militaris CM01] &gt;gi|346326518|gb|EGX96114.1| hypothetical protein CCM_00769 [Cordyceps militaris CM01]	gi|573976091|ref|XM_006665928.1|/1e-140/Cordyceps militaris CM01 hypothetical protein (CCM_00769), partial mRNA	NA	NA	NA	NA	cellular_component:GO:0016021//integral component of membrane;
Unigene4659_All	Unigene4659_All	402.04	194.98	313.42	gi|573984761|ref|XP_006670301.1|/3.30537e-07/hypothetical protein CCM_05092 [Cordyceps militaris CM01] &gt;gi|346321337|gb|EGX90936.1| hypothetical protein CCM_05092 [Cordyceps militaris CM01]	gi|573984760|ref|XM_006670238.1|/3e-36/Cordyceps militaris CM01 hypothetical protein (CCM_05092), partial mRNA	NA	NA	NA	NA	NA
Unigene4657_All	Unigene4657_All	398.82	448.39	417.83	gi|573993501|ref|XP_006674671.1|/1.42221e-60/ribosomal protein L34-like protein [Cordyceps militaris CM01] &gt;gi|346318248|gb|EGX87852.1| ribosomal protein L34-like protein [Cordyceps militaris CM01]	gi|573993500|ref|XM_006674608.1|/0.0/Cordyceps militaris CM01 ribosomal protein L34-like protein (CCM_09475), partial mRNA	sp|P40525|RL34B_YEAST/8e-41/60S ribosomal protein L34-B OS=Saccharomyces cerevisiae (strain ATCC 204508 / S288c) GN=RPL34B PE=1 SV=1	cmt:CCM_09475/1e-61/ribosomal protein L34-like protein; K02915 large subunit ribosomal protein L34e	YIL052c/2e-40/---	NA	biological_process:GO:0006412//translation;cellular_component:GO:0005840//ribosome;molecular_function:GO:0003735//structural constituent of ribosome;
Unigene6907_All	Unigene6907_All	397.81	225.8	142.79	gi|573975502|ref|XP_006665696.1|/0/cathepsin E, putative [Cordyceps militaris CM01] &gt;gi|346326223|gb|EGX95819.1| cathepsin E, putative [Cordyceps militaris CM01]	gi|753718541|gb|CP009816.1|/1e-25/Botrytis cinerea B05.10 chromosome 12, complete sequence	sp|P17576|CARP_IRPLA/2e-73/Polyporopepsin OS=Irpex lacteus PE=1 SV=1	cput:CONPUDRAFT_109605/2e-79/acid protease; K06002 pepsin A [EC:3.4.23.1]	PA0055/2e-20/---	NA	biological_process:GO:0006508//proteolysis;molecular_function:GO:0004190//aspartic-type endopeptidase activity;
CL45.Contig3_All	CL45.Contig3_All	397.67	443.14	471.32	gi|927759247|gb|KPA42370.1|/2.3243e-72/polymerase i core factor subunit [Fusarium langsethiae]	gi|573980490|ref|XM_006668112.1|/0.0/Cordyceps militaris CM01 ubiquitin fusion protein (CCM_02960), partial mRNA	sp|P0C224|RL40_NEUCR/6e-69/Ubiquitin-60S ribosomal protein L40 OS=Neurospora crassa (strain ATCC 24698 / 74-OR23-1A / CBS 708.71 / DSM 1257 / FGSC 987) GN=crp-79 PE=1 SV=2	cmt:CCM_02960/1e-68/ubiquitin fusion protein; K02927 large subunit ribosomal protein L40e	YLL039c/1e-36/---	PF01020/6.6E-30/Ribosomal L40e family	biological_process:GO:0006412//translation;cellular_component:GO:0005840//ribosome;molecular_function:GO:0003735//structural constituent of ribosome;
Unigene5527_All	Unigene5527_All	397.56	458.3	450.34	gi|701767847|gb|KGQ03305.1|/2.09391e-62/40S ribosomal protein S26E [Beauveria bassiana D1-5]	gi|953466648|ref|XM_014721313.1|/1e-117/Metarhizium majus ARSEF 297 Ribosomal protein S26e partial mRNA	sp|P21772|RS26_NEUCR/4e-59/40S ribosomal protein S26E OS=Neurospora crassa (strain ATCC 24698 / 74-OR23-1A / CBS 708.71 / DSM 1257 / FGSC 987) GN=rps-26 PE=3 SV=2	maj:MAA_04703/5e-61/Ribosomal protein S26e; K02976 small subunit ribosomal protein S26e	SPAC1805.11c/1e-47/---	NA	biological_process:GO:0006412//translation;cellular_component:GO:0005840//ribosome;molecular_function:GO:0003735//structural constituent of ribosome;
CL1743.Contig1_All	CL1743.Contig1_All	394.29	361.73	272.76	gi|573977822|ref|XP_006666856.1|/0/dynamin GTPase, putative [Cordyceps militaris CM01] &gt;gi|346327383|gb|EGX96979.1| dynamin GTPase, putative [Cordyceps militaris CM01]	gi|573977823|ref|XM_006666794.1|/0.0/Cordyceps militaris CM01 thiazole biosynthetic enzyme (CCM_01639), partial mRNA	sp|P23618|THI4_FUSOX/1e-154/Thiamine thiazole synthase OS=Fusarium oxysporum GN=sti35 PE=1 SV=2	cmt:CCM_01639/0.0/thiazole biosynthetic enzyme; K03146 thiamine thiazole synthase	SPBC26H8.01/1e-118/---	SM00066/3.7E-6/GAL4-like Zn(II)2Cys6 (or C6 zinc) binuclear cluster DNA-binding domain	biological_process:GO:0006950//response to stress;GO:0052837//thiazole biosynthetic process;GO:0055114//oxidation-reduction process;GO:0009228//thiamine biosynthetic process;GO:0006357//regulation of transcription from RNA polymerase II promoter;GO:0000002//mitochondrial genome maintenance;cellular_component:GO:0005634//nucleus;GO:0005829//cytosol;molecular_function:GO:0000981//RNA polymerase II …
CL2163.Contig1_All	CL2163.Contig1_All	393.44	435.36	275.24	NA	NA	NA	NA	NA	NA	NA
CL2082.Contig2_All	CL2082.Contig2_All	392.96	271.03	154.1	gi|573977958|ref|XP_006666924.1|/0/L-ornithine N5-oxygenase SidA [Cordyceps militaris CM01] &gt;gi|346327451|gb|EGX97047.1| L-ornithine N5-oxygenase SidA [Cordyceps militaris CM01]	gi|573977957|ref|XM_006666861.1|/0.0/Cordyceps militaris CM01 L-ornithine N5-oxygenase SidA (CCM_01706), partial mRNA	sp|P56584|SID1_USTMA/6e-61/L-ornithine 5-monooxygenase OS=Ustilago maydis (strain 521 / FGSC 9021) GN=SID1 PE=2 SV=2	cmt:CCM_01706/0.0/L-ornithine N5-oxygenase SidA; K10531 L-ornithine N5-oxygenase [EC:1.13.12.-]	PA2386/2e-69/---	PR00368/8.2E-6/FAD-dependent pyridine nucleotide reductase signature	biological_process:GO:0055114//oxidation-reduction process;cellular_component:GO:0005634//nucleus;GO:0005829//cytosol;molecular_function:GO:0004497//monooxygenase activity;
Unigene320_All	Unigene320_All	392.16	403.35	507.55	gi|573988791|ref|XP_006672316.1|/3.30466e-145/cytosolic Cu/Zn superoxide dismutase [Cordyceps militaris CM01] &gt;gi|346321095|gb|EGX90695.1| cytosolic Cu/Zn superoxide dismutase [Cordyceps militaris CM01]	gi|573988790|ref|XM_006672253.1|/0.0/Cordyceps militaris CM01 cytosolic Cu/Zn superoxide dismutase (CCM_07115), partial mRNA	sp|Q5ACV9|SOD6_CANAL/6e-22/Cell surface superoxide dismutase [Cu-Zn] 6 OS=Candida albicans (strain SC5314 / ATCC MYA-2876) GN=SOD6 PE=1 SV=1	pic:PICST_41302/1e-22/SOD2.1; Cu/Zn superoxide dismutase (EC:1.15.1.1); K04565 superoxide dismutase, Cu-Zn family [EC:1.15.1.1]	NA	PF00080/2.0E-14/Copper/zinc superoxide dismutase (SODC)	biological_process:GO:0006801//superoxide metabolic process;GO:0055114//oxidation-reduction process;molecular_function:GO:0046872//metal ion binding;
Unigene3308_All	Unigene3308_All	390.69	469.53	323.6	gi|573979610|ref|XP_006667750.1|/0/Methyltransferase type 11 [Cordyceps militaris CM01] &gt;gi|346324667|gb|EGX94264.1| Methyltransferase type 11 [Cordyceps militaris CM01]	gi|573979609|ref|XM_006667687.1|/0.0/Cordyceps militaris CM01 Methyltransferase type 11 (CCM_02535), partial mRNA	sp|P38892|CRG1_YEAST/2e-06/Probable S-adenosylmethionine-dependent methyltransferase CRG1 OS=Saccharomyces cerevisiae (strain ATCC 204508 / S288c) GN=CRG1 PE=1 SV=1	NA	NA	PF08241/4.4E-8/Methyltransferase domain	biological_process:GO:0032259//methylation;molecular_function:GO:0008168//methyltransferase activity;
Unigene6503_All	Unigene6503_All	389.82	454.34	496.26	gi|573979090|ref|XP_006667490.1|/4.78376e-48/nucleosome binding protein [Cordyceps militaris CM01] &gt;gi|346324407|gb|EGX94004.1| nucleosome binding protein [Cordyceps militaris CM01]	gi|573979089|ref|XM_006667427.1|/1e-162/Cordyceps militaris CM01 nucleosome binding protein (CCM_02275), partial mRNA	sp|Q7S045|NHP6_NEUCR/4e-43/Non-histone chromosomal protein 6 OS=Neurospora crassa (strain ATCC 24698 / 74-OR23-1A / CBS 708.71 / DSM 1257 / FGSC 987) GN=nhp-1 PE=3 SV=1	dsq:DICSQDRAFT_56786/3e-10/HMG-box; K11296 high mobility group protein B3	YBR089c-a/1e-28/---	PF00505/1.9E-24/HMG (high mobility group) box	biological_process:GO:0006281//DNA repair;GO:0006355//regulation of transcription, DNA-templated;cellular_component:GO:0005634//nucleus;GO:0005694//chromosome;molecular_function:GO:0003677//DNA binding;
CL2114.Contig2_All	CL2114.Contig2_All	388.88	448.89	384.85	gi|573989515|ref|XP_006672678.1|/0/para-hydroxybenzoate-polyprenyltransferase Coq2, putative [Cordyceps militaris CM01] &gt;gi|346319621|gb|EGX89222.1| para-hydroxybenzoate-polyprenyltransferase Coq2, putative [Cordyceps militaris CM01]	gi|573989516|ref|XM_006672616.1|/0.0/Cordyceps militaris CM01 40S ribosomal protein S23 (CCM_07475), partial mRNA	sp|Q9HE74|RS23_NEUCR/7e-77/40S ribosomal protein S23 OS=Neurospora crassa (strain ATCC 24698 / 74-OR23-1A / CBS 708.71 / DSM 1257 / FGSC 987) GN=crp-28 PE=3 SV=1	vda:VDAG_01222/1e-157/para-hydroxybenzoate-polyprenyltransferase; K06125 4-hydroxybenzoate polyprenyltransferase [EC:2.5.1.39]	YPR132w/5e-70/---	PS00943/-/UbiA prenyltransferase family signature.	biological_process:GO:0008299//isoprenoid biosynthetic process;GO:0006744//ubiquinone biosynthetic process;cellular_component:GO:0031305//integral component of mitochondrial inner membrane;molecular_function:GO:0008412//4-hydroxybenzoate octaprenyltransferase activity;
Unigene8251_All	Unigene8251_All	388.38	455.77	412.94	gi|573993433|ref|XP_006674637.1|/1.30911e-74/40S ribosomal protein S16 [Cordyceps militaris CM01] &gt;gi|346318214|gb|EGX87818.1| 40S ribosomal protein S16 [Cordyceps militaris CM01]	gi|573993432|ref|XM_006674574.1|/0.0/Cordyceps militaris CM01 40S ribosomal protein S16 (CCM_09440), partial mRNA	sp|O94017|RS16_CANAX/5e-61/40S ribosomal protein S16 OS=Candida albicans GN=RPS16 PE=3 SV=1	cmt:CCM_09440/1e-75/40S ribosomal protein S16; K02960 small subunit ribosomal protein S16e	YMR143w/1e-59/---	NA	biological_process:GO:0006412//translation;cellular_component:GO:0005840//ribosome;molecular_function:GO:0003735//structural constituent of ribosome;
Unigene8439_All	Unigene8439_All	387.72	382.47	435.06	gi|573982413|ref|XP_006669127.1|/2.84202e-122/protein required for cell viability Rrp17 [Cordyceps militaris CM01] &gt;gi|346322945|gb|EGX92543.1| protein required for cell viability Rrp17 [Cordyceps militaris CM01]	gi|573982412|ref|XM_006669064.1|/0.0/Cordyceps militaris CM01 protein required for cell viability Rrp17 (CCM_03916), partial mRNA	sp|Q02088|TPM_SCHPO/6e-34/Tropomyosin OS=Schizosaccharomyces pombe (strain 972 / ATCC 24843) GN=cdc8 PE=3 SV=1	cmt:CCM_03916/3e-123/protein required for cell viability Rrp17; K14851 ribosomal RNA-processing protein 17	PH0283/6e-09/---	PTHR14577/4.1E-38/--	biological_process:GO:0006364//rRNA processing;cellular_component:GO:0005737//cytoplasm;
Unigene4604_All	Unigene4604_All	387.68	426.84	356.97	gi|573985617|ref|XP_006670729.1|/1.23749e-145/ribosomal protein S5 [Cordyceps militaris CM01] &gt;gi|346321765|gb|EGX91364.1| ribosomal protein S5 [Cordyceps militaris CM01]	gi|667643390|ref|XM_008595305.1|/0.0/Beauveria bassiana ARSEF 2860 40S ribosomal protein S2 partial mRNA	sp|O74892|RS2_SCHPO/3e-97/40S ribosomal protein S2 OS=Schizosaccharomyces pombe (strain 972 / ATCC 24843) GN=rps2 PE=1 SV=1	cmt:CCM_05522/1e-146/ribosomal protein S5; K02981 small subunit ribosomal protein S2e	SPCC576.08c/7e-97/---	PTHR13718/5.3E-156/--	biological_process:GO:0006407//rRNA export from nucleus;GO:0045903//positive regulation of translational fidelity;cellular_component:GO:0032040//small-subunit processome;GO:0022627//cytosolic small ribosomal subunit;molecular_function:GO:0070181//small ribosomal subunit rRNA binding;GO:0003735//structural constituent of ribosome;
Unigene3805_All	Unigene3805_All	387.08	398.11	475.53	gi|573984083|ref|XP_006669962.1|/1.21115e-34/mitochondrial ATP synthase epsilon chain domain-containing protein [Cordyceps militaris CM01] &gt;gi|346323781|gb|EGX93379.1| mitochondrial ATP synthase epsilon chain domain-containing protein [Cordyceps militaris CM01]	gi|573984082|ref|XM_006669899.1|/1e-122/Cordyceps militaris CM01 mitochondrial ATP synthase epsilon chain domain-containing protein (CCM_04753), partial mRNA	NA	cmt:CCM_04753/1e-35/mitochondrial ATP synthase epsilon chain domain-containing protein; K02135 F-type H+-transporting ATPase subunit epsilon	NA	NA	biological_process:GO:0015986//ATP synthesis coupled proton transport;cellular_component:GO:0000275//mitochondrial proton-transporting ATP synthase complex, catalytic core F(1);molecular_function:GO:0046933//proton-transporting ATP synthase activity, rotational mechanism;GO:0046961//proton-transporting ATPase activity, rotational mechanism;
Unigene5490_All	Unigene5490_All	384.53	380.91	309.74	gi|573992047|ref|XP_006673944.1|/1.3748e-118/hypothetical protein CCM_08745 [Cordyceps militaris CM01] &gt;gi|346319097|gb|EGX88699.1| hypothetical protein CCM_08745 [Cordyceps militaris CM01]	gi|573992046|ref|XM_006673881.1|/0.0/Cordyceps militaris CM01 hypothetical protein (CCM_08745), partial mRNA	sp|O36027|WSP1_SCHPO/1e-22/Wiskott-Aldrich syndrome protein homolog 1 OS=Schizosaccharomyces pombe (strain 972 / ATCC 24843) GN=wsp1 PE=1 SV=3	afm:AFUA_6G02540/4e-23/actin associated protein Wsp1; K05747 Wiskott-Aldrich syndrome protein	Rv3876/1e-18/---	NA	NA
Unigene1304_All	Unigene1304_All	383.38	405.19	410.43	gi|573981373|ref|XP_006668607.1|/2.01461e-112/nascent polypeptide-associated complex (NAC) subunit, putative [Cordyceps militaris CM01] &gt;gi|346325524|gb|EGX95121.1| nascent polypeptide-associated complex (NAC) subunit, putative [Cordyceps militaris CM01]	gi|667662280|ref|XM_008604750.1|/0.0/Beauveria bassiana ARSEF 2860 nascent polypeptide-associated complex (NAC) subunit partial mRNA	sp|Q2H4Z2|NACA_CHAGB/2e-86/Nascent polypeptide-associated complex subunit alpha OS=Chaetomium globosum (strain ATCC 6205 / CBS 148.51 / DSM 1962 / NBRC 6347 / NRRL 1970) GN=EGD2 PE=3 SV=2	maj:MAA_00825/2e-87/Nascent polypeptide-associated complex NAC; K03626 nascent polypeptide-associated complex subunit alpha	SPBC25H2.05/1e-35/---	PTHR21713/4.9E-90/--	biological_process:GO:0051083//'de novo' cotranslational protein folding;GO:0006620//posttranslational protein targeting to membrane;cellular_component:GO:0005854//nascent polypeptide-associated complex;molecular_function:GO:0070300//phosphatidic acid binding;GO:0032266//phosphatidylinositol-3-phosphate binding;GO:0080025//phosphatidylinositol-3,5-bisphosphate binding;GO:0070273//phosphatidylinos…
Unigene1100_All	Unigene1100_All	383.22	510.15	417.13	gi|573975992|ref|XP_006665941.1|/0/2OG-Fe(II) oxygenase family oxidoreductase, putative [Cordyceps militaris CM01] &gt;gi|346326468|gb|EGX96064.1| 2OG-Fe(II) oxygenase family oxidoreductase, putative [Cordyceps militaris CM01]	gi|667659472|ref|XM_008603346.1|/0.0/Beauveria bassiana ARSEF 2860 2OG-Fe(II) oxygenase superfamily protein partial mRNA	sp|P56739|Y212_BOTFU/1e-55/Uncharacterized 21.2 kDa protein OS=Botryotinia fuckeliana PE=2 SV=1	cmt:CCM_00720/7e-98/Dopa 4,5-dioxygenase; K10253 DOPA 4,5-dioxygenase [EC:1.14.99.-]	SPCC965.15/2e-11/---	PF14226/1.3E-9/non-haem dioxygenase in morphine synthesis N-terminal	biological_process:GO:0055114//oxidation-reduction process;molecular_function:GO:0046872//metal ion binding;GO:0016491//oxidoreductase activity;
CL711.Contig2_All	CL711.Contig2_All	382.53	396.06	274.22	gi|573982329|ref|XP_006669085.1|/0/elongation factor 1-gamma [Cordyceps militaris CM01] &gt;gi|346322903|gb|EGX92501.1| elongation factor 1-gamma [Cordyceps militaris CM01]	gi|573982328|ref|XM_006669022.1|/0.0/Cordyceps militaris CM01 elongation factor 1-gamma (CCM_03874), partial mRNA	sp|P29547|EF1G1_YEAST/7e-95/Elongation factor 1-gamma 1 OS=Saccharomyces cerevisiae (strain ATCC 204508 / S288c) GN=CAM1 PE=1 SV=2	cmt:CCM_03874/0.0/elongation factor 1-gamma; K03233 elongation factor 1-gamma	YPL048w/2e-94/---	PS50404/11.833/Soluble glutathione S-transferase N-terminal domain profile.	biological_process:GO:0006414//translational elongation;molecular_function:GO:0003746//translation elongation factor activity;
Unigene4524_All	Unigene4524_All	382.22	416.82	542	gi|573992485|ref|XP_006674163.1|/0/glutamate decarboxylase [Cordyceps militaris CM01] &gt;gi|346319316|gb|EGX88918.1| glutamate decarboxylase [Cordyceps militaris CM01]	gi|573992484|ref|XM_006674100.1|/0.0/Cordyceps militaris CM01 glutamate decarboxylase (CCM_08965), partial mRNA	sp|Q9P3I3|ARGD_NEUCR/1e-180/Acetylornithine aminotransferase, mitochondrial OS=Neurospora crassa (strain ATCC 24698 / 74-OR23-1A / CBS 708.71 / DSM 1257 / FGSC 987) GN=arg-8 PE=3 SV=1	cmt:CCM_08965/0.0/glutamate decarboxylase; K01580 glutamate decarboxylase [EC:4.1.1.15]	sll1641/1e-118/---	PTHR11999/0.0/--	biological_process:GO:0006536//glutamate metabolic process;GO:0006525//arginine metabolic process;molecular_function:GO:0004351//glutamate decarboxylase activity;GO:0008483//transaminase activity;GO:0030170//pyridoxal phosphate binding;
Unigene8322_All	Unigene8322_All	381.38	580.1	517.76	gi|573979614|ref|XP_006667752.1|/0/acyl-CoA desaturase [Cordyceps militaris CM01] &gt;gi|346324669|gb|EGX94266.1| acyl-CoA desaturase [Cordyceps militaris CM01]	gi|573979613|ref|XM_006667689.1|/0.0/Cordyceps militaris CM01 acyl-CoA desaturase (CCM_02537), partial mRNA	sp|Q12618|ACO1_AJECA/0.0/Acyl-CoA desaturase OS=Ajellomyces capsulatus GN=OLE1 PE=3 SV=1	cmt:CCM_02537/0.0/acyl-CoA desaturase; K00507 stearoyl-CoA desaturase (Delta-9 desaturase) [EC:1.14.19.1]	SPCC1281.06c_1/1e-113/---	PS00191/-/Cytochrome b5 family, heme-binding domain signature.	biological_process:GO:0006636//unsaturated fatty acid biosynthetic process;GO:0055114//oxidation-reduction process;cellular_component:GO:0016021//integral component of membrane;molecular_function:GO:0020037//heme binding;GO:0046872//metal ion binding;GO:0004768//stearoyl-CoA 9-desaturase activity;
CL626.Contig2_All	CL626.Contig2_All	377.44	423.43	451.7	gi|573982369|ref|XP_006669105.1|/5.13777e-123/protein yop-1 [Cordyceps militaris CM01] &gt;gi|346322923|gb|EGX92521.1| protein yop-1 [Cordyceps militaris CM01]	gi|573982368|ref|XM_006669042.1|/0.0/Cordyceps militaris CM01 protein yop-1 (CCM_03894), partial mRNA	sp|Q871R7|YOP1_NEUCR/1e-70/Protein yop-1 OS=Neurospora crassa (strain ATCC 24698 / 74-OR23-1A / CBS 708.71 / DSM 1257 / FGSC 987) GN=yop-1 PE=3 SV=1	cmt:CCM_03894/5e-124/protein yop-1; K17279 receptor expression-enhancing protein 5/6	YPR028w/3e-30/---	PF03134/7.8E-31/TB2/DP1, HVA22 family	biological_process:GO:0048309//endoplasmic reticulum inheritance;GO:0016192//vesicle-mediated transport;GO:0071786//endoplasmic reticulum tubular network organization;GO:0034613//cellular protein localization;GO:0051292//nuclear pore complex assembly;cellular_component:GO:0032153//cell division site;GO:0032541//cortical endoplasmic reticulum;GO:0016021//integral component of membrane;
Unigene3125_All	Unigene3125_All	376.91	476.4	317.53	gi|573984811|ref|XP_006670326.1|/0/1,3-beta-glucanosyltransferase Gel1 [Cordyceps militaris CM01] &gt;gi|346321362|gb|EGX90961.1| 1,3-beta-glucanosyltransferase Gel1 [Cordyceps militaris CM01]	gi|573984810|ref|XM_006670263.1|/0.0/Cordyceps militaris CM01 1,3-beta-glucanosyltransferase Gel1 (CCM_05117), partial mRNA	sp|B0XT72|GEL1_ASPFC/2e-133/1,3-beta-glucanosyltransferase gel1 OS=Neosartorya fumigata (strain CEA10 / CBS 144.89 / FGSC A1163) GN=gel1 PE=1 SV=1	ani:AN8241.2/3e-18/similar to chitinase; K01183 chitinase [EC:3.2.1.14]	DR0400/2e-06/---	NA	biological_process:GO:0005975//carbohydrate metabolic process;cellular_component:GO:0009277//fungal-type cell wall;GO:0005886//plasma membrane;GO:0031225//anchored component of membrane;molecular_function:GO:0042124//1,3-beta-glucanosyltransferase activity;
Unigene4134_All	Unigene4134_All	375.3	384.62	481.76	gi|573992097|ref|XP_006673969.1|/3.11198e-156/hypothetical protein CCM_08770 [Cordyceps militaris CM01] &gt;gi|346319122|gb|EGX88724.1| hypothetical protein CCM_08770 [Cordyceps militaris CM01]	gi|573992096|ref|XM_006673906.1|/0.0/Cordyceps militaris CM01 hypothetical protein (CCM_08770), partial mRNA	sp|P08640|MUC1_YEAST/2e-12/Flocculation protein FLO11 OS=Saccharomyces cerevisiae (strain ATCC 204508 / S288c) GN=MUC1 PE=1 SV=2	sce:YIR019C/3e-11/FLO11, MUC1, STA4; Flo11p; K19851 flocculation protein FLO11	DRA0210/1e-07/---	NA	NA
CL1465.Contig1_All	CL1465.Contig1_All	374.76	385.03	385.43	gi|573981143|ref|XP_006668492.1|/3.79075e-88/nascent polypeptide-associated complex (NAC) subunit [Cordyceps militaris CM01] &gt;gi|346325409|gb|EGX95006.1| nascent polypeptide-associated complex (NAC) subunit [Cordyceps militaris CM01]	gi|573981142|ref|XM_006668429.1|/0.0/Cordyceps militaris CM01 nascent polypeptide-associated complex (NAC) subunit (CCM_03278), partial mRNA	sp|A4RC23|NACB_MAGO7/4e-63/Nascent polypeptide-associated complex subunit beta OS=Magnaporthe oryzae (strain 70-15 / ATCC MYA-4617 / FGSC 8958) GN=EGD1 PE=3 SV=2	cmt:CCM_03278/4e-89/nascent polypeptide-associated complex (NAC) subunit; K01527 nascent polypeptide-associated complex subunit beta	RSc1191/2e-07/---	NA	biological_process:GO:0006355//regulation of transcription, DNA-templated;
Unigene7575_All	Unigene7575_All	373.95	538.15	660.19	gi|573981339|ref|XP_006668590.1|/0/hypothetical protein CCM_03376 [Cordyceps militaris CM01] &gt;gi|346325507|gb|EGX95104.1| hypothetical protein CCM_03376 [Cordyceps militaris CM01]	gi|573981338|ref|XM_006668527.1|/0.0/Cordyceps militaris CM01 hypothetical protein (CCM_03376), partial mRNA	NA	NA	NA	NA	cellular_component:GO:0016021//integral component of membrane;
Unigene6583_All	Unigene6583_All	372.28	275.25	484.76	gi|573991223|ref|XP_006673532.1|/0/siderophore iron transporter mirB [Cordyceps militaris CM01] &gt;gi|346318685|gb|EGX88287.1| siderophore iron transporter mirB [Cordyceps militaris CM01]	gi|573991222|ref|XM_006673469.1|/0.0/Cordyceps militaris CM01 siderophore iron transporter mirB (CCM_08330), partial mRNA	sp|Q870L2|MIRB_EMENI/5e-121/Siderophore iron transporter mirB OS=Emericella nidulans (strain FGSC A4 / ATCC 38163 / CBS 112.46 / NRRL 194 / M139) GN=mirB PE=3 SV=1	gtr:GLOTRDRAFT_121064/3e-64/MFS general substrate transporter; K08197 MFS transporter, SIT family, siderophore-iron:H+ symporter	PA0246/7e-19/---	PTHR24003:SF443/5.9E-175/--	biological_process:GO:0055085//transmembrane transport;cellular_component:GO:0016021//integral component of membrane;
Unigene3040_All	Unigene3040_All	371.01	420.26	292.01	NA	NA	NA	NA	NA	NA	NA
CL2163.Contig5_All	CL2163.Contig5_All	367.4	406.36	274.19	gi|573988777|ref|XP_006672309.1|/0/hypothetical protein CCM_07108 [Cordyceps militaris CM01] &gt;gi|346321088|gb|EGX90688.1| hypothetical protein CCM_07108 [Cordyceps militaris CM01]	gi|573988780|ref|XM_006672248.1|/0.0/Cordyceps militaris CM01 C6 transcription factor (CCM_07110), partial mRNA	sp|P08640|MUC1_YEAST/1e-19/Flocculation protein FLO11 OS=Saccharomyces cerevisiae (strain ATCC 204508 / S288c) GN=MUC1 PE=1 SV=2	sce:YIR019C/1e-18/FLO11, MUC1, STA4; Flo11p; K19851 flocculation protein FLO11	CAC2806/8e-16/---	PF05729/1.4E-5/NACHT domain	biological_process:GO:0006351//transcription, DNA-templated;cellular_component:GO:0005634//nucleus;molecular_function:GO:0003677//DNA binding;GO:0016787//hydrolase activity;GO:0008270//zinc ion binding;
Unigene3277_All	Unigene3277_All	366.74	403.09	353.51	gi|573982455|ref|XP_006669148.1|/0/nucleosome assembly protein [Cordyceps militaris CM01] &gt;gi|346322966|gb|EGX92564.1| nucleosome assembly protein [Cordyceps militaris CM01]	gi|573982454|ref|XM_006669085.1|/0.0/Cordyceps militaris CM01 nucleosome assembly protein (CCM_03937), partial mRNA	sp|P25293|NAP1_YEAST/2e-95/Nucleosome assembly protein OS=Saccharomyces cerevisiae (strain ATCC 204508 / S288c) GN=NAP1 PE=1 SV=2	cmt:CCM_03937/0.0/nucleosome assembly protein; K11279 nucleosome assembly protein 1-like 1	XF1267/3e-10/---	PTHR11875:SF7/1.6E-190/--	biological_process:GO:0006334//nucleosome assembly;cellular_component:GO:0005634//nucleus;
Unigene5318_All	Unigene5318_All	363.52	406.5	409.6	gi|667653805|ref|XP_008598734.1|/5.11632e-122/60S ribosomal protein L10-A-like protein [Beauveria bassiana ARSEF 2860] &gt;gi|400597822|gb|EJP65546.1| 60S ribosomal protein L10-A-like protein [Beauveria bassiana ARSEF 2860] &gt;gi|701774350|gb|KGQ08629.1| 60S ribosomal protein L10-A [Beauveria bassiana D1-5]	gi|573983926|ref|XM_006669821.1|/0.0/Cordyceps militaris CM01 60S ribosomal protein L10 (CCM_04674), partial mRNA	sp|Q09127|RL10A_SCHPO/4e-97/60S ribosomal protein L10-A OS=Schizosaccharomyces pombe (strain 972 / ATCC 24843) GN=rpl10a PE=2 SV=2	maw:MAC_02587/8e-118/60S ribosomal protein L10-A-like protein; K02866 large subunit ribosomal protein L10e	SPBC18E5.04/1e-96/---	PF00252/3.3E-31/Ribosomal protein L16p/L10e	biological_process:GO:0006412//translation;cellular_component:GO:0005840//ribosome;molecular_function:GO:0003735//structural constituent of ribosome;
Unigene5632_All	Unigene5632_All	362.27	359.83	425.09	gi|573982451|ref|XP_006669146.1|/2.27298e-48/hypothetical protein CCM_03935 [Cordyceps militaris CM01] &gt;gi|346322964|gb|EGX92562.1| hypothetical protein CCM_03935 [Cordyceps militaris CM01]	gi|573982450|ref|XM_006669083.1|/1e-150/Cordyceps militaris CM01 hypothetical protein (CCM_03935), partial mRNA	NA	NA	NA	NA	cellular_component:GO:0016021//integral component of membrane;
Unigene654_All	Unigene654_All	360.8	374.99	334.91	gi|573986151|ref|XP_006670996.1|/0/adenylosuccinate lyase [Cordyceps militaris CM01] &gt;gi|346322032|gb|EGX91631.1| adenylosuccinate lyase [Cordyceps militaris CM01]	gi|573986150|ref|XM_006670933.1|/0.0/Cordyceps militaris CM01 adenylosuccinate lyase (CCM_05789), partial mRNA	sp|Q05911|PUR8_YEAST/9e-143/Adenylosuccinate lyase OS=Saccharomyces cerevisiae (strain ATCC 204508 / S288c) GN=ADE13 PE=1 SV=1	cmt:CCM_05789/0.0/adenylosuccinate lyase; K01756 adenylosuccinate lyase [EC:4.3.2.2]	YLR359w/2e-142/---	PR00149/8.3E-8/Fumarate lyase superfamily signature	biological_process:GO:0044208//'de novo' AMP biosynthetic process;GO:0006189//'de novo' IMP biosynthetic process;molecular_function:GO:0070626//(S)-2-(5-amino-1-(5-phospho-D-ribosyl)imidazole-4-carboxamido)succinate AMP-lyase (fumarate-forming) activity;GO:0004018//N6-(1,2-dicarboxyethyl)AMP AMP-lyase (fumarate-forming) activity;
Unigene8418_All	Unigene8418_All	358.07	370.9	200.6	gi|701771939|gb|KGQ06619.1|/2.62571e-45/N-acetyltransferase eso1 [Beauveria bassiana D1-5]	gi|667658390|ref|XM_008602805.1|/2e-37/Beauveria bassiana ARSEF 2860 impB/mucB/samB family protein partial mRNA	NA	NA	NA	NA	biological_process:GO:0006281//DNA repair;molecular_function:GO:0046872//metal ion binding;GO:0003684//damaged DNA binding;
Unigene7446_All	Unigene7446_All	357.38	377.94	597.99	gi|573992317|ref|XP_006674079.1|/0/hypothetical protein CCM_08880 [Cordyceps militaris CM01] &gt;gi|346319232|gb|EGX88834.1| hypothetical protein CCM_08880 [Cordyceps militaris CM01]	gi|768797034|gb|CP004939.1|/8e-22/Saccharomyces cerevisiae YJM1311 chromosome VI sequence	sp|Q4PBP6|NST1_USTMA/6e-06/Stress response protein NST1 OS=Ustilago maydis (strain 521 / FGSC 9021) GN=NST1 PE=3 SV=1	NA	NA	NA	NA
Unigene6521_All	Unigene6521_All	356.73	429.67	331.48	gi|573977764|ref|XP_006666827.1|/1.03367e-78/40S ribosomal protein S14 [Cordyceps militaris CM01] &gt;gi|346327354|gb|EGX96950.1| 40S ribosomal protein S14 [Cordyceps militaris CM01]	gi|573977763|ref|XM_006666764.1|/0.0/Cordyceps militaris CM01 40S ribosomal protein S14 (CCM_01609), partial mRNA	sp|P19115|RS14_NEUCR/1e-71/40S ribosomal protein S14 OS=Neurospora crassa (strain ATCC 24698 / 74-OR23-1A / CBS 708.71 / DSM 1257 / FGSC 987) GN=rps-14 PE=3 SV=2	cmt:CCM_01609/1e-79/40S ribosomal protein S14; K02955 small subunit ribosomal protein S14e	SPBC18H10.13/4e-63/---	NA	biological_process:GO:0006412//translation;cellular_component:GO:0005840//ribosome;molecular_function:GO:0003735//structural constituent of ribosome;
Unigene1190_All	Unigene1190_All	355.48	422.14	378.35	gi|573977476|ref|XP_006666683.1|/5.69747e-78/40S ribosomal protein S12 [Cordyceps militaris CM01] &gt;gi|346327210|gb|EGX96806.1| 40S ribosomal protein S12 [Cordyceps militaris CM01]	gi|573977475|ref|XM_006666620.1|/0.0/Cordyceps militaris CM01 40S ribosomal protein S12 (CCM_01464), partial mRNA	sp|O59936|RS12_BLUGH/6e-59/40S ribosomal protein S12 OS=Blumeria graminis f. sp. hordei GN=RPS12 PE=3 SV=1	cmt:CCM_01464/5e-79/40S ribosomal protein S12; K02951 small subunit ribosomal protein S12e	SPCC962.04/1e-44/---	NA	biological_process:GO:0006412//translation;cellular_component:GO:0022627//cytosolic small ribosomal subunit;molecular_function:GO:0003735//structural constituent of ribosome;
Unigene6713_All	Unigene6713_All	355.37	455.1	303.81	gi|573992277|ref|XP_006674059.1|/0/60S ribosomal protein L3 [Cordyceps militaris CM01] &gt;gi|346319212|gb|EGX88814.1| 60S ribosomal protein L3 [Cordyceps militaris CM01]	gi|573992276|ref|XM_006673996.1|/0.0/Cordyceps militaris CM01 60S ribosomal protein L3 (CCM_08860), partial mRNA	sp|P59671|RL3_NEUCR/0.0/60S ribosomal protein L3 OS=Neurospora crassa (strain ATCC 24698 / 74-OR23-1A / CBS 708.71 / DSM 1257 / FGSC 987) GN=rpl-3 PE=3 SV=1	cmt:CCM_08860/0.0/60S ribosomal protein L3; K02925 large subunit ribosomal protein L3e	YOR063w/4e-171/---	PF00297/4.5E-117/Ribosomal protein L3	biological_process:GO:0000027//ribosomal large subunit assembly;GO:0006412//translation;cellular_component:GO:0022625//cytosolic large ribosomal subunit;molecular_function:GO:0003735//structural constituent of ribosome;
Unigene1159_All	Unigene1159_All	352.37	399.51	389.6	gi|531863874|gb|EQL01058.1|/3.28826e-69/Ribosomal protein L27e [Ophiocordyceps sinensis CO18]	gi|573975089|ref|XM_006665427.1|/0.0/Cordyceps militaris CM01 60S ribosomal protein L27 (CCM_00267), partial mRNA	sp|O14388|RL27A_SCHPO/7e-52/60S ribosomal protein L27-A OS=Schizosaccharomyces pombe (strain 972 / ATCC 24843) GN=rpl27a PE=2 SV=2	nhe:NECHADRAFT_59945/5e-68/60S ribosomal protein L27; K02901 large subunit ribosomal protein L27e	SPBC685.07c/2e-51/---	NA	biological_process:GO:0006412//translation;cellular_component:GO:0005840//ribosome;molecular_function:GO:0003735//structural constituent of ribosome;
CL280.Contig1_All	CL280.Contig1_All	352.26	380.43	323.08	gi|573987331|ref|XP_006671586.1|/9.11621e-143/14-3-3 protein [Cordyceps militaris CM01] &gt;gi|346322623|gb|EGX92222.1| 14-3-3 protein [Cordyceps militaris CM01]	gi|573987330|ref|XM_006671523.1|/0.0/Cordyceps militaris CM01 14-3-3 protein (CCM_06383), partial mRNA	sp|Q99002|1433_TRIHA/4e-125/14-3-3 protein homolog OS=Trichoderma harzianum PE=2 SV=1	cmt:CCM_06383/8e-144/14-3-3 protein; K06630 14-3-3 protein epsilon	SPAC8E11.02c/3e-107/---	NA	molecular_function:GO:0019904//protein domain specific binding;
Unigene6706_All	Unigene6706_All	351.3	249.45	226.86	gi|573993819|ref|XP_006674830.1|/1.25086e-129/MSF1 domain containing protein [Cordyceps militaris CM01] &gt;gi|346318068|gb|EGX87673.1| MSF1 domain containing protein [Cordyceps militaris CM01]	gi|573993818|ref|XM_006674767.1|/0.0/Cordyceps militaris CM01 MSF1 domain containing protein (CCM_09634), partial mRNA	sp|Q05776|UPS1_YEAST/9e-14/Protein UPS1, mitochondrial OS=Saccharomyces cerevisiae (strain ATCC 204508 / S288c) GN=UPS1 PE=1 SV=1	cgi:CGB_G3590W/4e-15/hypothetical protein; K19995 secretory carrier-associated membrane protein	NA	NA	biological_process:GO:2001247//positive regulation of phosphatidylcholine biosynthetic process;GO:0015914//phospholipid transport;GO:0032048//cardiolipin metabolic process;cellular_component:GO:0031314//extrinsic component of mitochondrial inner membrane;GO:0005758//mitochondrial intermembrane space;molecular_function:GO:1990050//phosphatidic acid transporter activity;
Unigene4696_All	Unigene4696_All	349.34	374.88	19.29	gi|573990335|ref|XP_006673088.1|/1.4609e-47/hypothetical protein CCM_07885 [Cordyceps militaris CM01] &gt;gi|346320032|gb|EGX89633.1| hypothetical protein CCM_07885 [Cordyceps militaris CM01]	gi|573990334|ref|XM_006673025.1|/1e-160/Cordyceps militaris CM01 hypothetical protein (CCM_07885), partial mRNA	NA	NA	NA	NA	NA
Unigene2265_All	Unigene2265_All	348.91	404.32	336.33	gi|573975246|ref|XP_006665568.1|/0/transketolase [Cordyceps militaris CM01] &gt;gi|346326095|gb|EGX95691.1| transketolase [Cordyceps militaris CM01]	gi|573975245|ref|XM_006665505.1|/0.0/Cordyceps militaris CM01 transketolase (CCM_00345), partial mRNA	sp|P34736|TKT_PICST/0.0/Transketolase OS=Scheffersomyces stipitis (strain ATCC 58785 / CBS 6054 / NBRC 10063 / NRRL Y-11545) GN=TKT PE=3 SV=2	cmt:CCM_00345/0.0/transketolase; K00615 transketolase [EC:2.2.1.1]	YPR074c/0.0/---	PF02779/1.8E-44/Transketolase, pyrimidine binding domain	biological_process:GO:0008152//metabolic process;cellular_component:GO:0005634//nucleus;GO:0005829//cytosol;molecular_function:GO:0046872//metal ion binding;GO:0004802//transketolase activity;
Unigene7518_All	Unigene7518_All	348.73	420.63	268.75	gi|573982909|ref|XP_006669375.1|/0/elongation factor 2 [Cordyceps militaris CM01] &gt;gi|346323193|gb|EGX92791.1| elongation factor 2 [Cordyceps militaris CM01]	gi|573982908|ref|XM_006669312.1|/0.0/Cordyceps militaris CM01 elongation factor 2 (CCM_04164), partial mRNA	sp|Q96X45|EF2_NEUCR/0.0/Elongation factor 2 OS=Neurospora crassa (strain ATCC 24698 / 74-OR23-1A / CBS 708.71 / DSM 1257 / FGSC 987) GN=cot-3 PE=3 SV=3	cmt:CCM_04164/0.0/elongation factor 2; K03234 elongation factor 2	YOR133w/0.0/---	PS00301/-/GTP-binding elongation factors signature.	biological_process:GO:0006414//translational elongation;molecular_function:GO:0003746//translation elongation factor activity;GO:0005525//GTP binding;GO:0003924//GTPase activity;
Unigene3124_All	Unigene3124_All	348.47	397.99	313.11	gi|573977366|ref|XP_006666628.1|/0/eIF4A-like protein [Cordyceps militaris CM01] &gt;gi|346327155|gb|EGX96751.1| eIF4A-like protein [Cordyceps militaris CM01]	gi|573977365|ref|XM_006666565.1|/0.0/Cordyceps militaris CM01 eIF4A-like protein (CCM_01409), partial mRNA	sp|Q7RV88|IF4A_NEUCR/0.0/ATP-dependent RNA helicase eIF4A OS=Neurospora crassa (strain ATCC 24698 / 74-OR23-1A / CBS 708.71 / DSM 1257 / FGSC 987) GN=tif-1 PE=3 SV=2	cmt:CCM_01409/0.0/eIF4A-like protein; K03257 translation initiation factor 4A	SPAC1006.07/0.0/---	PTHR24031:SF221/3.7E-269/--	cellular_component:GO:0005829//cytosol;molecular_function:GO:0005524//ATP binding;GO:0004386//helicase activity;GO:0003676//nucleic acid binding;
Unigene8417_All	Unigene8417_All	345.67	859.18	1909.5	gi|573992979|ref|XP_006674410.1|/0/phosphatidylserine decarboxylase family protein [Cordyceps militaris CM01] &gt;gi|346318474|gb|EGX88077.1| phosphatidylserine decarboxylase family protein [Cordyceps militaris CM01]	gi|573992978|ref|XM_006674347.1|/0.0/Cordyceps militaris CM01 phosphatidylserine decarboxylase family protein (CCM_09213), partial mRNA	sp|O14111|PSD3_SCHPO/1e-22/Phosphatidylserine decarboxylase proenzyme 3 OS=Schizosaccharomyces pombe (strain 972 / ATCC 24843) GN=psd3 PE=3 SV=2	cmt:CCM_09213/0.0/phosphatidylserine decarboxylase family protein; K01613 phosphatidylserine decarboxylase [EC:4.1.1.65]	SPAC31G5.15_2/3e-22/---	PF02666/7.0E-34/Phosphatidylserine decarboxylase	biological_process:GO:0008654//phospholipid biosynthetic process;molecular_function:GO:0004609//phosphatidylserine decarboxylase activity;
Unigene1735_All	Unigene1735_All	345.25	430.84	513.93	gi|573986339|ref|XP_006671090.1|/0/hypothetical protein CCM_05883 [Cordyceps militaris CM01] &gt;gi|346322126|gb|EGX91725.1| hypothetical protein CCM_05883 [Cordyceps militaris CM01]	gi|768311755|gb|CP010983.1|/2e-12/Verticillium dahliae VdLs.17 chromosome 4, complete sequence	sp|P08640|MUC1_YEAST/3e-17/Flocculation protein FLO11 OS=Saccharomyces cerevisiae (strain ATCC 204508 / S288c) GN=MUC1 PE=1 SV=2	yli:YALI0B22110g/5e-17/YALI0B22110p; K05747 Wiskott-Aldrich syndrome protein	XF0818/4e-10/---	NA	NA
Unigene8483_All	Unigene8483_All	345.18	232.62	69.66	gi|573977344|ref|XP_006666617.1|/0/Carbohydrate-binding WSC [Cordyceps militaris CM01] &gt;gi|346327144|gb|EGX96740.1| Carbohydrate-binding WSC [Cordyceps militaris CM01]	gi|573977343|ref|XM_006666554.1|/0.0/Cordyceps militaris CM01 Carbohydrate-binding WSC (CCM_01398), partial mRNA	sp|P08640|MUC1_YEAST/3e-10/Flocculation protein FLO11 OS=Saccharomyces cerevisiae (strain ATCC 204508 / S288c) GN=MUC1 PE=1 SV=2	mbe:MBM_02253/4e-24/WSC domain-containing protein; K19791 iron transport multicopper oxidase	PAE1324/8e-09/---	PS51212/10.783/WSC domain profile.	biological_process:GO:0050896//response to stimulus;
Unigene669_All	Unigene669_All	344.67	364.11	283.3	gi|573983253|ref|XP_006669547.1|/0/rab GDP-dissociation inhibitor [Cordyceps militaris CM01] &gt;gi|346323366|gb|EGX92964.1| rab GDP-dissociation inhibitor [Cordyceps militaris CM01]	gi|573983252|ref|XM_006669484.1|/0.0/Cordyceps militaris CM01 rab GDP-dissociation inhibitor (CCM_04336), partial mRNA	sp|P39958|GDI1_YEAST/3e-145/Rab GDP-dissociation inhibitor OS=Saccharomyces cerevisiae (strain ATCC 204508 / S288c) GN=GDI1 PE=1 SV=1	cmt:CCM_04336/0.0/rab GDP-dissociation inhibitor; K17255 Rab GDP dissociation inhibitor	YER136w/7e-145/---	PF00996/1.1E-181/GDP dissociation inhibitor	biological_process:GO:0055114//oxidation-reduction process;GO:0050790//regulation of catalytic activity;GO:0016192//vesicle-mediated transport;GO:0007264//small GTPase mediated signal transduction;GO:0015031//protein transport;cellular_component:GO:0032153//cell division site;GO:0005829//cytosol;molecular_function:GO:0005093//Rab GDP-dissociation inhibitor activity;GO:0016491//oxidoreductase acti…
Unigene8381_All	Unigene8381_All	344.63	393.78	341.51	gi|573976968|ref|XP_006666429.1|/0/D111/G-patch domain protein [Cordyceps militaris CM01] &gt;gi|346326956|gb|EGX96552.1| D111/G-patch domain protein [Cordyceps militaris CM01]	gi|573976967|ref|XM_006666366.1|/0.0/Cordyceps militaris CM01 D111/G-patch domain protein (CCM_01209), partial mRNA	sp|Q875B6|SQS1_PODAS/9e-70/Protein SQS1 OS=Podospora anserina GN=SQS1 PE=3 SV=1	cmt:CCM_01208/6e-69/Histone H2B; K11252 histone H2B	NA	PF01585/2.9E-9/G-patch domain	biological_process:GO:0000398//mRNA splicing, via spliceosome;GO:0051096//positive regulation of helicase activity;GO:0032781//positive regulation of ATPase activity;GO:0030490//maturation of SSU-rRNA;cellular_component:GO:0030686//90S preribosome;GO:0030687//preribosome, large subunit precursor;GO:0005829//cytosol;GO:0030688//preribosome, small subunit precursor;molecular_function:GO:0003676//nu…
Unigene1331_All	Unigene1331_All	344.32	408.12	352.63	gi|573977478|ref|XP_006666684.1|/1.9663e-67/40S ribosomal protein S22 [Cordyceps militaris CM01] &gt;gi|346327211|gb|EGX96807.1| 40S ribosomal protein S22 [Cordyceps militaris CM01]	gi|573977477|ref|XM_006666621.1|/0.0/Cordyceps militaris CM01 40S ribosomal protein S22 (CCM_01465), partial mRNA	sp|Q7RV75|RS22_NEUCR/6e-66/40S ribosomal protein S22 OS=Neurospora crassa (strain ATCC 24698 / 74-OR23-1A / CBS 708.71 / DSM 1257 / FGSC 987) GN=crp-27 PE=3 SV=1	cmt:CCM_01465/2e-68/40S ribosomal protein S22; K02957 small subunit ribosomal protein S15Ae	YJL190c/1e-59/---	NA	biological_process:GO:0006412//translation;cellular_component:GO:0005840//ribosome;molecular_function:GO:0003735//structural constituent of ribosome;
Unigene8109_All	Unigene8109_All	343.51	381.93	385.07	gi|573979216|ref|XP_006667553.1|/8.84258e-158/ATP synthase subunit gamma precursor [Cordyceps militaris CM01] &gt;gi|346324470|gb|EGX94067.1| ATP synthase subunit gamma precursor [Cordyceps militaris CM01]	gi|573979215|ref|XM_006667490.1|/0.0/Cordyceps militaris CM01 ATP synthase subunit gamma precursor (CCM_02338), partial mRNA	sp|O74754|ATPG_SCHPO/1e-70/ATP synthase subunit gamma, mitochondrial OS=Schizosaccharomyces pombe (strain 972 / ATCC 24843) GN=atp3 PE=3 SV=1	cmt:CCM_02338/8e-159/ATP synthase subunit gamma precursor; K02136 F-type H+-transporting ATPase subunit gamma	SPBC1734.13/3e-70/---	PS00153/-/ATP synthase gamma subunit signature.	biological_process:GO:0015986//ATP synthesis coupled proton transport;cellular_component:GO:0005756//mitochondrial proton-transporting ATP synthase, central stalk;molecular_function:GO:0046933//proton-transporting ATP synthase activity, rotational mechanism;GO:0046961//proton-transporting ATPase activity, rotational mechanism;
Unigene2257_All	Unigene2257_All	342.95	245.14	420	gi|573986671|ref|XP_006671256.1|/0/MFS multidrug transporter, putative [Cordyceps militaris CM01] &gt;gi|346322293|gb|EGX91892.1| MFS multidrug transporter, putative [Cordyceps militaris CM01]	gi|667644076|ref|XM_008595648.1|/1e-137/Beauveria bassiana ARSEF 2860 major facilitator superfamily transporter partial mRNA	sp|Q07824|TPO1_YEAST/1e-41/Polyamine transporter 1 OS=Saccharomyces cerevisiae (strain ATCC 204508 / S288c) GN=TPO1 PE=1 SV=1	psq:PUNSTDRAFT_67565/2e-47/MFS general substrate transporter; K08158 MFS transporter, DHA1 family, multidrug resistance protein	YBR008c/8e-32/---	PS50850/12.547/Major facilitator superfamily (MFS) profile.	biological_process:GO:0055085//transmembrane transport;cellular_component:GO:0016021//integral component of membrane;
CL1519.Contig1_All	CL1519.Contig1_All	342.88	381.72	383.88	gi|573976020|ref|XP_006665955.1|/0/GTP-binding protein YchF [Cordyceps militaris CM01] &gt;gi|346326482|gb|EGX96078.1| GTP-binding protein YchF [Cordyceps militaris CM01]	gi|573976019|ref|XM_006665892.1|/0.0/Cordyceps militaris CM01 GTP-binding protein YchF (CCM_00733), partial mRNA	sp|P38219|OLA1_YEAST/1e-138/Obg-like ATPase 1 OS=Saccharomyces cerevisiae (strain ATCC 204508 / S288c) GN=OLA1 PE=1 SV=1	cmt:CCM_00733/0.0/GTP-binding protein YchF; K19788 obg-like ATPase 1	YBR025c/3e-138/---	PTHR23305:SF11/3.7E-273/--	cellular_component:GO:0005634//nucleus;GO:0005829//cytosol;molecular_function:GO:0043022//ribosome binding;GO:0005524//ATP binding;GO:0043023//ribosomal large subunit binding;GO:0005525//GTP binding;GO:0016887//ATPase activity;
CL993.Contig1_All	CL993.Contig1_All	342.11	331.73	278.42	gi|573985095|ref|XP_006670468.1|/0/malate dehydrogenase [Cordyceps militaris CM01] &gt;gi|346321504|gb|EGX91103.1| malate dehydrogenase [Cordyceps militaris CM01]	gi|573985094|ref|XM_006670405.1|/0.0/Cordyceps militaris CM01 malate dehydrogenase (CCM_05260), partial mRNA	sp|P17505|MDHM_YEAST/3e-112/Malate dehydrogenase, mitochondrial OS=Saccharomyces cerevisiae (strain ATCC 204508 / S288c) GN=MDH1 PE=1 SV=2	cmt:CCM_05260/0.0/malate dehydrogenase; K00026 malate dehydrogenase [EC:1.1.1.37]	YKL085w/8e-112/---	PS00068/-/Malate dehydrogenase active site signature.	biological_process:GO:0006099//tricarboxylic acid cycle;GO:0005975//carbohydrate metabolic process;GO:0006108//malate metabolic process;molecular_function:GO:0030060//L-malate dehydrogenase activity;
Unigene7558_All	Unigene7558_All	341.32	300.93	387.5	gi|573992217|ref|XP_006674029.1|/5.52751e-108/stress response RCI peptide [Cordyceps militaris CM01] &gt;gi|346319182|gb|EGX88784.1| stress response RCI peptide [Cordyceps militaris CM01]	gi|573992216|ref|XM_006673966.1|/0.0/Cordyceps militaris CM01 stress response RCI peptide (CCM_08830), partial mRNA	sp|Q9C1W4|PMP3_SCHPO/4e-11/Plasma membrane proteolipid 3 OS=Schizosaccharomyces pombe (strain 972 / ATCC 24843) GN=pmp3 PE=3 SV=2	erc:Ecym_7349/9e-08/hypothetical protein; K19849 signaling mucin MSB2	YDR525w-a/2e-09/---	NA	cellular_component:GO:0016021//integral component of membrane;
Unigene8151_All	Unigene8151_All	338.56	389.7	397.89	gi|573980136|ref|XP_006668013.1|/1.03141e-84/ATP synthase delta chain, putative [Cordyceps militaris CM01] &gt;gi|346324930|gb|EGX94527.1| ATP synthase delta chain, putative [Cordyceps militaris CM01]	gi|667644804|ref|XM_008596012.1|/0.0/Beauveria bassiana ARSEF 2860 ATP synthase delta chain partial mRNA	sp|P56525|ATPD_NEUCR/7e-67/ATP synthase subunit delta, mitochondrial OS=Neurospora crassa (strain ATCC 24698 / 74-OR23-1A / CBS 708.71 / DSM 1257 / FGSC 987) GN=des PE=3 SV=2	fgr:FGSG_12955/2e-70/ATP synthase subunit delta; K02134 F-type H+-transporting ATPase subunit delta	YDL004w/7e-36/---	PF02823/5.0E-21/ATP synthase, Delta/Epsilon chain, beta-sandwich domain	biological_process:GO:0015986//ATP synthesis coupled proton transport;cellular_component:GO:0045261//proton-transporting ATP synthase complex, catalytic core F(1);molecular_function:GO:0046933//proton-transporting ATP synthase activity, rotational mechanism;GO:0046961//proton-transporting ATPase activity, rotational mechanism;
Unigene6369_All	Unigene6369_All	338.26	341.97	330.78	gi|573979878|ref|XP_006667884.1|/1.314e-105/SCF complex subunit Skp1 [Cordyceps militaris CM01] &gt;gi|346324801|gb|EGX94398.1| SCF complex subunit Skp1 [Cordyceps militaris CM01]	gi|573979877|ref|XM_006667821.1|/0.0/Cordyceps militaris CM01 SCF complex subunit Skp1 (CCM_02669), partial mRNA	sp|Q8NK13|SKP1_NEUCR/2e-74/E3 ubiquitin ligase complex SCF subunit scon-3 OS=Neurospora crassa (strain ATCC 24698 / 74-OR23-1A / CBS 708.71 / DSM 1257 / FGSC 987) GN=scon-3 PE=1 SV=1	cmt:CCM_02669/1e-106/SCF complex subunit Skp1; K03094 S-phase kinase-associated protein 1	SPBC409.05/2e-64/---	PTHR11165/4.9E-88/--	biological_process:GO:0045116//protein neddylation;GO:0016310//phosphorylation;GO:0031146//SCF-dependent proteasomal ubiquitin-dependent protein catabolic process;GO:0007035//vacuolar acidification;GO:0042787//protein ubiquitination involved in ubiquitin-dependent protein catabolic process;GO:0000920//cell separation after cytokinesis;GO:0045841//negative regulation of mitotic metaphase/anaphase …
Unigene6644_All	Unigene6644_All	337.8	357.29	360.76	gi|573974870|ref|XP_006665380.1|/9.54256e-80/hypothetical protein CCM_00157 [Cordyceps militaris CM01] &gt;gi|346325907|gb|EGX95503.1| hypothetical protein CCM_00157 [Cordyceps militaris CM01]	gi|667646316|ref|XM_008596768.1|/0.0/Beauveria bassiana ARSEF 2860 60S ribosomal protein L23 partial mRNA	sp|P0CX42|RL23B_YEAST/4e-60/60S ribosomal protein L23-B OS=Saccharomyces cerevisiae (strain ATCC 204508 / S288c) GN=RPL23B PE=1 SV=1	nhe:NECHADRAFT_102401/1e-73/60S ribosomal protein L23; K02894 large subunit ribosomal protein L23e	YER117w/1e-59/---	NA	biological_process:GO:0006412//translation;cellular_component:GO:0005840//ribosome;molecular_function:GO:0003735//structural constituent of ribosome;
Unigene4942_All	Unigene4942_All	334.39	386.46	403.92	gi|573982457|ref|XP_006669149.1|/0/D-3-phosphoglycerate dehydrogenase 1 [Cordyceps militaris CM01] &gt;gi|346322967|gb|EGX92565.1| D-3-phosphoglycerate dehydrogenase 1 [Cordyceps militaris CM01]	gi|573982456|ref|XM_006669086.1|/0.0/Cordyceps militaris CM01 D-3-phosphoglycerate dehydrogenase 1 (CCM_03938), partial mRNA	sp|P40510|SER33_YEAST/1e-169/D-3-phosphoglycerate dehydrogenase 2 OS=Saccharomyces cerevisiae (strain ATCC 204508 / S288c) GN=SER33 PE=1 SV=1	cmt:CCM_03938/0.0/D-3-phosphoglycerate dehydrogenase 1; K00058 D-3-phosphoglycerate dehydrogenase [EC:1.1.1.95]	YIL074c/3e-169/---	PS00670/-/D-isomer specific 2-hydroxyacid dehydrogenases signature 2.	biological_process:GO:0006564//L-serine biosynthetic process;GO:0055114//oxidation-reduction process;molecular_function:GO:0016597//amino acid binding;GO:0051287//NAD binding;GO:0004617//phosphoglycerate dehydrogenase activity;
Unigene2268_All	Unigene2268_All	331.79	389.89	285.75	gi|573984751|ref|XP_006670296.1|/0/glucose-regulated protein [Cordyceps militaris CM01] &gt;gi|346321332|gb|EGX90931.1| glucose-regulated protein [Cordyceps militaris CM01]	gi|573984750|ref|XM_006670233.1|/0.0/Cordyceps militaris CM01 glucose-regulated protein (CCM_05087), partial mRNA	sp|P78695|GRP78_NEUCR/0.0/78 kDa glucose-regulated protein homolog OS=Neurospora crassa (strain ATCC 24698 / 74-OR23-1A / CBS 708.71 / DSM 1257 / FGSC 987) GN=grp78 PE=3 SV=3	cmt:CCM_05087/0.0/glucose-regulated protein; K09490 heat shock 70kDa protein 5	SPAC22A12.15c/0.0/---	PF10712/1.0E-154/NAD-specific glutamate dehydrogenase	biological_process:GO:0006986//response to unfolded protein;GO:0006616//SRP-dependent cotranslational protein targeting to membrane, translocation;GO:0030433//ER-associated ubiquitin-dependent protein catabolic process;GO:0051084//'de novo' posttranslational protein folding;GO:0000742//karyogamy involved in conjugation with cellular fusion;GO:0031204//posttranslational protein targeting to membra…
Unigene6479_All	Unigene6479_All	329.81	274.37	211.65	gi|573978908|ref|XP_006667399.1|/1.81331e-72/hypothetical protein CCM_02183 [Cordyceps militaris CM01] &gt;gi|346324316|gb|EGX93913.1| hypothetical protein CCM_02183 [Cordyceps militaris CM01]	gi|573978907|ref|XM_006667336.1|/0.0/Cordyceps militaris CM01 hypothetical protein (CCM_02183), partial mRNA	sp|O36027|WSP1_SCHPO/1e-09/Wiskott-Aldrich syndrome protein homolog 1 OS=Schizosaccharomyces pombe (strain 972 / ATCC 24843) GN=wsp1 PE=1 SV=3	maj:MAA_03848/2e-12/evh1; K05747 Wiskott-Aldrich syndrome protein	PA0197/5e-08/---	NA	NA
CL438.Contig2_All	CL438.Contig2_All	329.04	377.62	538.88	gi|573992099|ref|XP_006673970.1|/0/non-ribosomal peptide synthetase [Cordyceps militaris CM01] &gt;gi|346319123|gb|EGX88725.1| non-ribosomal peptide synthetase [Cordyceps militaris CM01]	gi|573992098|ref|XM_006673907.1|/0.0/Cordyceps militaris CM01 non-ribosomal peptide synthetase (CCM_08771), partial mRNA	sp|Q4WF61|NRPS3_ASPFU/3e-50/Nonribosomal peptide synthetase 3 OS=Neosartorya fumigata (strain ATCC MYA-4609 / Af293 / CBS 101355 / FGSC A1100) GN=NRPS3 PE=2 SV=2	aor:AOR_1_920074/9e-46/AO090038000543; N-(5-amino-5-carboxypentanoyl)-L-cysteinyl-D-valine synthase; K12743 N-(5-amino-5-carboxypentanoyl)-L-cysteinyl-D-valine synthase [EC:6.3.2.26]	Cgl2655_1/7e-166/---	PF13193/1.6E-6/AMP-binding enzyme C-terminal domain	biological_process:GO:0008152//metabolic process;cellular_component:GO:0016021//integral component of membrane;molecular_function:GO:0031177//phosphopantetheine binding;GO:0003824//catalytic activity;
Unigene2859_All	Unigene2859_All	328.29	243.78	167.84	gi|667643483|ref|XP_008593573.1|/5.08425e-55/hypothetical protein BBA_00254 [Beauveria bassiana ARSEF 2860] &gt;gi|400603026|gb|EJP70624.1| hypothetical protein BBA_00254 [Beauveria bassiana ARSEF 2860]	gi|573985554|ref|XM_006670635.1|/1e-136/Cordyceps militaris CM01 hypothetical protein (CCM_05491), partial mRNA	NA	NA	NA	NA	NA
Unigene1758_All	Unigene1758_All	328.16	419.24	369.45	gi|573974974|ref|XP_006665432.1|/0/ATP-citrate synthase subunit 1 [Cordyceps militaris CM01] &gt;gi|346325959|gb|EGX95555.1| ATP-citrate synthase subunit 1 [Cordyceps militaris CM01]	gi|573974973|ref|XM_006665369.1|/0.0/Cordyceps militaris CM01 ATP-citrate synthase subunit 1 (CCM_00209), partial mRNA	sp|O93988|ACL1_SORMK/0.0/ATP-citrate synthase subunit 1 OS=Sordaria macrospora (strain ATCC MYA-333 / DSM 997 / K(L3346) / K-hell) GN=ACL1 PE=3 SV=1	cmt:CCM_00209/0.0/ATP-citrate synthase subunit 1; K01648 ATP citrate (pro-S)-lyase [EC:2.3.3.8]	SPAC22A12.16/5e-168/---	PS01217/-/ATP-citrate lyase / succinyl-CoA ligases family signature 3.	biological_process:GO:0008152//metabolic process;cellular_component:GO:0005634//nucleus;GO:0005829//cytosol;molecular_function:GO:0048037//cofactor binding;GO:0046912//transferase activity, transferring acyl groups, acyl groups converted into alkyl on transfer;
CL2023.Contig2_All	CL2023.Contig2_All	327.88	440.41	374.74	gi|573986371|ref|XP_006671106.1|/1.16893e-61/60S ribosomal protein L35 [Cordyceps militaris CM01] &gt;gi|346322142|gb|EGX91741.1| 60S ribosomal protein L35 [Cordyceps militaris CM01]	gi|573986370|ref|XM_006671043.1|/0.0/Cordyceps militaris CM01 60S ribosomal protein L35 (CCM_05899), partial mRNA	sp|O74904|RL35_SCHPO/4e-27/60S ribosomal protein L35 OS=Schizosaccharomyces pombe (strain 972 / ATCC 24843) GN=rpl35 PE=1 SV=1	cmt:CCM_05899/1e-62/60S ribosomal protein L35; K02918 large subunit ribosomal protein L35e	SPCC613.05c/1e-26/---	PTHR13872/1.4E-52/--	biological_process:GO:0006412//translation;cellular_component:GO:0005840//ribosome;molecular_function:GO:0003735//structural constituent of ribosome;
Unigene8215_All	Unigene8215_All	327.21	344.03	375.33	gi|573986867|ref|XP_006671354.1|/1.11276e-80/cellobiose dehydrogenase [Cordyceps militaris CM01] &gt;gi|346322391|gb|EGX91990.1| cellobiose dehydrogenase [Cordyceps militaris CM01]	gi|573986866|ref|XM_006671291.1|/0.0/Cordyceps militaris CM01 cellobiose dehydrogenase (CCM_06150), partial mRNA	NA	maj:MAA_04235/6e-40/ATP synthase H chain; K02141 F-type H+-transporting ATPase subunit h	NA	NA	cellular_component:GO:0016021//integral component of membrane;
Unigene2898_All	Unigene2898_All	326.95	188.95	133.24	gi|729191320|emb|CEJ82663.1|/1.50673e-23/hypothetical protein VHEMI02712 [Torrubiella hemipterigena]	NA	NA	NA	NA	NA	NA
Unigene3239_All	Unigene3239_All	322.24	302.05	266.59	gi|573978868|ref|XP_006667379.1|/3.47025e-102/inorganic phosphate transporter [Cordyceps militaris CM01] &gt;gi|346324296|gb|EGX93893.1| inorganic phosphate transporter [Cordyceps militaris CM01]	gi|573978867|ref|XM_006667316.1|/0.0/Cordyceps militaris CM01 inorganic phosphate transporter (CCM_02163), partial mRNA	sp|P38264|PHO88_YEAST/2e-45/Inorganic phosphate transport protein PHO88 OS=Saccharomyces cerevisiae (strain ATCC 204508 / S288c) GN=PHO88 PE=1 SV=1	maj:MAA_03848/1e-08/evh1; K05747 Wiskott-Aldrich syndrome protein	YBR106w/4e-45/---	NA	biological_process:GO:0006817//phosphate ion transport;GO:0051604//protein maturation;cellular_component:GO:0016021//integral component of membrane;
Unigene1474_All	Unigene1474_All	322.05	374.1	274.02	gi|573975624|ref|XP_006665757.1|/0/ZZ type zinc finger domain protein [Cordyceps militaris CM01] &gt;gi|346326284|gb|EGX95880.1| ZZ type zinc finger domain protein [Cordyceps militaris CM01]	gi|573975623|ref|XM_006665694.1|/0.0/Cordyceps militaris CM01 ZZ type zinc finger domain protein (CCM_00534), partial mRNA	sp|Q9P792|YN8B_SCHPO/1e-23/ZZ-type zinc finger-containing protein P35G2.11c OS=Schizosaccharomyces pombe (strain 972 / ATCC 24843) GN=SPBP35G2.11c PE=4 SV=1	cmt:CCM_00534/0.0/ZZ type zinc finger domain protein; K17987 next to BRCA1 gene 1 protein	NA	SM00291/1.7E-8/Zinc-binding domain, present in Dystrophin, CREB-binding protein.	cellular_component:GO:0005794//Golgi apparatus;molecular_function:GO:0008270//zinc ion binding;
Unigene4789_All	Unigene4789_All	321.65	326.86	435.18	gi|573978794|ref|XP_006667342.1|/0/hypothetical protein CCM_02126 [Cordyceps militaris CM01] &gt;gi|346324259|gb|EGX93856.1| hypothetical protein CCM_02126 [Cordyceps militaris CM01]	gi|667647894|ref|XM_008597557.1|/7e-54/Beauveria bassiana ARSEF 2860 endonuclease/exonuclease/phosphatase family partial mRNA	sp|Q8TFG4|YL54_SCHPO/1e-15/Uncharacterized protein PB18E9.04c OS=Schizosaccharomyces pombe (strain 972 / ATCC 24843) GN=SPAPB18E9.04c PE=4 SV=1	sce:YIR019C/7e-14/FLO11, MUC1, STA4; Flo11p; K19851 flocculation protein FLO11	DR2133/2e-09/---	NA	biological_process:GO:0090305//nucleic acid phosphodiester bond hydrolysis;molecular_function:GO:0004527//exonuclease activity;GO:0004519//endonuclease activity;
Unigene1181_All	Unigene1181_All	321.05	367.89	324.36	gi|701776577|gb|KGQ10430.1|/3.1437e-87/40S ribosomal protein S13 [Beauveria bassiana D1-5]	gi|573979011|ref|XM_006667388.1|/0.0/Cordyceps militaris CM01 40S ribosomal protein S13 (CCM_02236), partial mRNA	sp|P33192|RS13_CANMA/2e-67/40S ribosomal protein S13 OS=Candida maltosa GN=RPS13 PE=3 SV=2	cmt:CCM_02236/2e-79/40S ribosomal protein S13; K02953 small subunit ribosomal protein S13e	YDR064w/4e-64/---	NA	biological_process:GO:0000462//maturation of SSU-rRNA from tricistronic rRNA transcript (SSU-rRNA, 5.8S rRNA, LSU-rRNA);GO:0006412//translation;cellular_component:GO:0022627//cytosolic small ribosomal subunit;molecular_function:GO:0070181//small ribosomal subunit rRNA binding;GO:0003735//structural constituent of ribosome;
CL590.Contig1_All	CL590.Contig1_All	320.65	351.42	269.05	gi|573982691|ref|XP_006669266.1|/0/tubulin beta chain [Cordyceps militaris CM01] &gt;gi|346323084|gb|EGX92682.1| tubulin beta chain [Cordyceps militaris CM01]	gi|573982690|ref|XM_006669203.1|/0.0/Cordyceps militaris CM01 tubulin beta chain (CCM_04055), partial mRNA	sp|P17938|TBB_EPITY/0.0/Tubulin beta chain OS=Epichloe typhina GN=TUBB PE=3 SV=1	cmt:CCM_04055/0.0/tubulin beta chain; K07375 tubulin beta	SPBC26H8.07c/0.0/---	PR01161/5.5E-102/Tubulin signature	biological_process:GO:0007017//microtubule-based process;cellular_component:GO:0005874//microtubule;GO:0005737//cytoplasm;molecular_function:GO:0005525//GTP binding;GO:0005200//structural constituent of cytoskeleton;GO:0003924//GTPase activity;
Unigene378_All	Unigene378_All	320.21	388.3	337.56	gi|927758812|gb|KPA41969.1|/2.59332e-60/60s ribosomal protein l44 [Fusarium langsethiae]	gi|573976719|ref|XM_006666242.1|/1e-178/Cordyceps militaris CM01 60S ribosomal protein L44 (CCM_01084), partial mRNA	sp|P52809|RL44_CYBJA/4e-54/60S ribosomal protein L44 OS=Cyberlindnera jadinii GN=RPL44 PE=3 SV=2	maw:MAC_04345/8e-58/60S ribosomal protein L44; K02929 large subunit ribosomal protein L44e	YNL162w/3e-52/---	NA	biological_process:GO:0006412//translation;cellular_component:GO:0005840//ribosome;molecular_function:GO:0003735//structural constituent of ribosome;
Unigene57_All	Unigene57_All	320.11	231.69	166.52	gi|667647255|ref|XP_008595459.1|/0/hypothetical protein BBA_02140 [Beauveria bassiana ARSEF 2860] &gt;gi|400601462|gb|EJP69105.1| hypothetical protein BBA_02140 [Beauveria bassiana ARSEF 2860]	gi|346995772|gb|CP003009.1|/1e-11/Thielavia terrestris NRRL 8126 chromosome 1, complete sequence	sp|Q8TFG4|YL54_SCHPO/1e-09/Uncharacterized protein PB18E9.04c OS=Schizosaccharomyces pombe (strain 972 / ATCC 24843) GN=SPAPB18E9.04c PE=4 SV=1	ttt:THITE_2111816/4e-08/glycoside hydrolase family 18 protein; K01183 chitinase [EC:3.2.1.14]	DR2133/2e-06/---	PF14388/1.0E-81/Domain of unknown function (DUF4419)	NA
Unigene6406_All	Unigene6406_All	316.73	301.45	303.2	gi|573991327|ref|XP_006673584.1|/1.84252e-67/progesterone binding protein, putative [Cordyceps militaris CM01] &gt;gi|346318737|gb|EGX88339.1| progesterone binding protein, putative [Cordyceps militaris CM01]	gi|667655212|ref|XM_008601216.1|/1e-111/Beauveria bassiana ARSEF 2860 cytochrome b5-like Heme/Steroid binding domain-containing protein partial mRNA	sp|O13995|DAP1_SCHPO/3e-11/Cytochrome P450 regulator dap1 OS=Schizosaccharomyces pombe (strain 972 / ATCC 24843) GN=dap1 PE=1 SV=1	wic:J056_000611/3e-27/Glyoxylate reductase/hydroxypyruvate reductase; K00049 glyoxylate/hydroxypyruvate reductase [EC:1.1.1.79 1.1.1.81]	NA	NA	NA
Unigene267_All	Unigene267_All	316.27	372.84	353.72	gi|573988307|ref|XP_006672074.1|/0/6-phosphogluconate dehydrogenase [Cordyceps militaris CM01] &gt;gi|346320853|gb|EGX90453.1| 6-phosphogluconate dehydrogenase [Cordyceps militaris CM01]	gi|573988306|ref|XM_006672011.1|/0.0/Cordyceps militaris CM01 6-phosphogluconate dehydrogenase (CCM_06873), partial mRNA	sp|P38720|6PGD1_YEAST/0.0/6-phosphogluconate dehydrogenase, decarboxylating 1 OS=Saccharomyces cerevisiae (strain ATCC 204508 / S288c) GN=GND1 PE=1 SV=1	cmt:CCM_06873/0.0/6-phosphogluconate dehydrogenase; K00033 6-phosphogluconate dehydrogenase [EC:1.1.1.44 1.1.1.343]	YHR183w/0.0/---	PF00393/1.0E-133/6-phosphogluconate dehydrogenase, C-terminal domain	biological_process:GO:0009051//pentose-phosphate shunt, oxidative branch;GO:0055114//oxidation-reduction process;cellular_component:GO:0005829//cytosol;molecular_function:GO:0050661//NADP binding;GO:0004616//phosphogluconate dehydrogenase (decarboxylating) activity;
Unigene4127_All	Unigene4127_All	315.25	397.33	270.43	gi|573989049|ref|XP_006672445.1|/0/adenosylhomocysteinase [Cordyceps militaris CM01] &gt;gi|346321224|gb|EGX90824.1| adenosylhomocysteinase [Cordyceps militaris CM01] &gt;gi|589913122|gb|AHL24715.1| adenosylhomocysteinase [Cordyceps militaris]	gi|573989048|ref|XM_006672382.1|/0.0/Cordyceps militaris CM01 adenosylhomocysteinase (CCM_07244), partial mRNA >gi|589913121|gb|KF971861.1| Cordyceps militaris adenosylhomocysteinase mRNA, partial cds	sp|P83783|SAHH_CANAL/0.0/Adenosylhomocysteinase OS=Candida albicans (strain SC5314 / ATCC MYA-2876) GN=SAH1 PE=1 SV=2	cmt:CCM_07244/0.0/adenosylhomocysteinase; K01251 adenosylhomocysteinase [EC:3.3.1.1]	YER043c/0.0/---	PF05221/1.5E-135/S-adenosyl-L-homocysteine hydrolase	biological_process:GO:0019510//S-adenosylhomocysteine catabolic process;GO:0006641//triglyceride metabolic process;GO:0006730//one-carbon metabolic process;GO:0006656//phosphatidylcholine biosynthetic process;molecular_function:GO:0004013//adenosylhomocysteinase activity;
Unigene1031_All	Unigene1031_All	314.34	378.66	260.76	gi|573991631|ref|XP_006673736.1|/0/5-methyltetrahydropteroyltriglutamate-homocysteine methyltransferase [Cordyceps militaris CM01] &gt;gi|346318889|gb|EGX88491.1| 5-methyltetrahydropteroyltriglutamate-homocysteine methyltransferase [Cordyceps militaris CM01]	gi|573991630|ref|XM_006673673.1|/0.0/Cordyceps militaris CM01 5-methyltetrahydropteroyltriglutamate-homocysteine methyltransferase (CCM_08535), partial mRNA	sp|Q9UT19|METE_SCHPO/0.0/Probable 5-methyltetrahydropteroyltriglutamate--homocysteine methyltransferase OS=Schizosaccharomyces pombe (strain 972 / ATCC 24843) GN=met26 PE=1 SV=1	cmt:CCM_08535/0.0/5-methyltetrahydropteroyltriglutamate-homocysteine methyltransferase; K00549 5-methyltetrahydropteroyltriglutamate--homocysteine methyltransferase [EC:2.1.1.14]	SPAC9.09/0.0/---	PF08267/7.7E-111/Cobalamin-independent synthase, N-terminal domain	biological_process:GO:0019280//L-methionine biosynthetic process from homoserine via O-acetyl-L-homoserine and cystathionine;GO:0046084//adenine biosynthetic process;GO:0032259//methylation;cellular_component:GO:0005634//nucleus;GO:0005829//cytosol;molecular_function:GO:0008270//zinc ion binding;GO:0003871//5-methyltetrahydropteroyltriglutamate-homocysteine S-methyltransferase activity;
Unigene663_All	Unigene663_All	312.43	355.69	242.58	gi|573986587|ref|XP_006671214.1|/0/homocitrate synthase [Cordyceps militaris CM01] &gt;gi|346322251|gb|EGX91850.1| homocitrate synthase [Cordyceps militaris CM01]	gi|573986586|ref|XM_006671151.1|/0.0/Cordyceps militaris CM01 homocitrate synthase (CCM_06007), partial mRNA	sp|O94225|HOSM_PENCW/2e-165/Homocitrate synthase, mitochondrial OS=Penicillium chrysogenum (strain ATCC 28089 / DSM 1075 / Wisconsin 54-1255) GN=lys1 PE=1 SV=1	cmt:CCM_06007/0.0/homocitrate synthase; K01655 homocitrate synthase [EC:2.3.3.14]	YDL131w/5e-164/---	PTHR10277/6.9E-269/--	biological_process:GO:0019878//lysine biosynthetic process via aminoadipic acid;cellular_component:GO:0005829//cytosol;molecular_function:GO:0004410//homocitrate synthase activity;
Unigene6767_All	Unigene6767_All	310.95	359.76	257.55	gi|573984953|ref|XP_006670397.1|/0/tubulin alpha chain [Cordyceps militaris CM01] &gt;gi|346321433|gb|EGX91032.1| tubulin alpha chain [Cordyceps militaris CM01]	gi|573984952|ref|XM_006670334.1|/0.0/Cordyceps militaris CM01 tubulin alpha chain (CCM_05189), partial mRNA	sp|Q5I2J3|TBA_GIBZE/0.0/Tubulin alpha chain OS=Gibberella zeae (strain PH-1 / ATCC MYA-4620 / FGSC 9075 / NRRL 31084) GN=TUB1 PE=3 SV=2	cmt:CCM_05189/0.0/tubulin alpha chain; K07374 tubulin alpha	SPBC800.05c/0.0/---	PR01161/1.9E-84/Tubulin signature	biological_process:GO:0007017//microtubule-based process;cellular_component:GO:0005874//microtubule;GO:0005737//cytoplasm;molecular_function:GO:0005525//GTP binding;GO:0005200//structural constituent of cytoskeleton;GO:0003924//GTPase activity;
Unigene6303_All	Unigene6303_All	310.86	327.05	343.41	gi|573975614|ref|XP_006665752.1|/7.68108e-157/vacuolar ATP synthase 16 kDa proteolipid subunit [Cordyceps militaris CM01] &gt;gi|346326279|gb|EGX95875.1| vacuolar ATP synthase 16 kDa proteolipid subunit [Cordyceps militaris CM01]	gi|573975613|ref|XM_006665689.1|/0.0/Cordyceps militaris CM01 vacuolar ATP synthase 16 kDa proteolipid subunit (CCM_00529), partial mRNA	sp|P31413|VATL_NEUCR/2e-76/V-type proton ATPase 16 kDa proteolipid subunit OS=Neurospora crassa (strain ATCC 24698 / 74-OR23-1A / CBS 708.71 / DSM 1257 / FGSC 987) GN=vma-3 PE=2 SV=1	cmt:CCM_00529/7e-158/vacuolar ATP synthase 16 kDa proteolipid subunit; K02155 V-type H+-transporting ATPase 16kDa proteolipid subunit	SPAC1B3.14/4e-70/---	PR00122/8.35E-59/Vacuolar ATP synthase 16kDa subunit signature	biological_process:GO:0006879//cellular iron ion homeostasis;GO:0006878//cellular copper ion homeostasis;GO:0015991//ATP hydrolysis coupled proton transport;GO:0006623//protein targeting to vacuole;GO:0007033//vacuole organization;GO:0006897//endocytosis;cellular_component:GO:0033179//proton-transporting V-type ATPase, V0 domain;GO:0005783//endoplasmic reticulum;GO:0005774//vacuolar membrane;GO:0…
CL2006.Contig1_All	CL2006.Contig1_All	310.59	200.42	101.68	gi|573981617|ref|XP_006668729.1|/0/GABA permease, putative [Cordyceps militaris CM01] &gt;gi|346325646|gb|EGX95243.1| GABA permease, putative [Cordyceps militaris CM01]	gi|667661624|ref|XM_008604422.1|/1e-116/Beauveria bassiana ARSEF 2860 choline transport protein partial mRNA	sp|P19807|HNM1_YEAST/2e-56/Choline transport protein OS=Saccharomyces cerevisiae (strain ATCC 204508 / S288c) GN=HNM1 PE=1 SV=1	lel:LELG_01218/6e-68/similar to choline transport protein; K19564 choline transport protein	YGL077c/4e-56/---	PF13520/5.4E-45/Amino acid permease	biological_process:GO:0003333//amino acid transmembrane transport;cellular_component:GO:0016021//integral component of membrane;molecular_function:GO:0015171//amino acid transmembrane transporter activity;
Unigene1898_All	Unigene1898_All	308.4	346.89	211.76	gi|573979156|ref|XP_006667523.1|/0/S-adenosylmethionine synthetase [Cordyceps militaris CM01] &gt;gi|346324440|gb|EGX94037.1| S-adenosylmethionine synthetase [Cordyceps militaris CM01]	gi|573979155|ref|XM_006667460.1|/0.0/Cordyceps militaris CM01 S-adenosylmethionine synthetase (CCM_02308), partial mRNA	sp|P48466|METK_NEUCR/0.0/S-adenosylmethionine synthase OS=Neurospora crassa (strain ATCC 24698 / 74-OR23-1A / CBS 708.71 / DSM 1257 / FGSC 987) GN=eth-1 PE=2 SV=1	cmt:CCM_02308/0.0/S-adenosylmethionine synthetase; K00789 S-adenosylmethionine synthetase [EC:2.5.1.6]	SPBC14F5.05c/5e-179/---	PS00377/-/S-adenosylmethionine synthase signature 2.	biological_process:GO:0006730//one-carbon metabolic process;GO:0006555//methionine metabolic process;GO:0006556//S-adenosylmethionine biosynthetic process;cellular_component:GO:0005634//nucleus;GO:0005829//cytosol;molecular_function:GO:0005524//ATP binding;GO:0046872//metal ion binding;GO:0004478//methionine adenosyltransferase activity;
Unigene4957_All	Unigene4957_All	308.11	149.57	43.73	gi|573984841|ref|XP_006670341.1|/0/high-affinity iron ion transporter FtrA [Cordyceps militaris CM01] &gt;gi|346321377|gb|EGX90976.1| high-affinity iron ion transporter FtrA [Cordyceps militaris CM01]	gi|573984840|ref|XM_006670278.1|/0.0/Cordyceps militaris CM01 high-affinity iron ion transporter FtrA (CCM_05132), partial mRNA	sp|Q09919|FIP1_SCHPO/3e-87/Plasma membrane iron permease OS=Schizosaccharomyces pombe (strain 972 / ATCC 24843) GN=fip1 PE=1 SV=1	cmt:CCM_05132/0.0/high-affinity iron ion transporter FtrA; K07243 high-affinity iron transporter	SPAC1F7.07c/7e-87/---	PTHR31632/9.0E-155/--	biological_process:GO:0006827//high-affinity iron ion transmembrane transport;cellular_component:GO:0005783//endoplasmic reticulum;GO:0033573//high-affinity iron permease complex;GO:0005794//Golgi apparatus;GO:0016021//integral component of membrane;molecular_function:GO:0005381//iron ion transmembrane transporter activity;
Unigene2171_All	Unigene2171_All	307.53	366.7	375.94	gi|573978842|ref|XP_006667366.1|/8.55638e-131/subunit IV of cytochrome c oxidase [Cordyceps militaris CM01] &gt;gi|346324283|gb|EGX93880.1| subunit IV of cytochrome c oxidase [Cordyceps militaris CM01]	gi|573978841|ref|XM_006667303.1|/0.0/Cordyceps militaris CM01 subunit IV of cytochrome c oxidase (CCM_02150), partial mRNA	sp|P06809|COX4_NEUCR/2e-68/Cytochrome c oxidase subunit 4, mitochondrial OS=Neurospora crassa (strain ATCC 24698 / 74-OR23-1A / CBS 708.71 / DSM 1257 / FGSC 987) GN=cox-4 PE=3 SV=2	maj:MAA_02425/9e-96/subunit IV of cytochrome c oxidase; K02265 cytochrome c oxidase subunit 5b	YPO2725/4e-08/---	NA	biological_process:GO:1902600//hydrogen ion transmembrane transport;GO:0006123//mitochondrial electron transport, cytochrome c to oxygen;GO:0009060//aerobic respiration;cellular_component:GO:0005751//mitochondrial respiratory chain complex IV;molecular_function:GO:0004129//cytochrome-c oxidase activity;GO:0008270//zinc ion binding;
Unigene4748_All	Unigene4748_All	307.3	397.06	350.74	gi|573981791|ref|XP_006668816.1|/1.09029e-29/40S ribosomal protein S28 [Cordyceps militaris CM01] &gt;gi|346325733|gb|EGX95330.1| 40S ribosomal protein S28 [Cordyceps militaris CM01] &gt;gi|701776040|gb|KGQ09995.1| 40S ribosomal protein S28 [Beauveria bassiana D1-5]	gi|573981790|ref|XM_006668753.1|/1e-112/Cordyceps militaris CM01 40S ribosomal protein S28 (CCM_03602), partial mRNA	sp|Q7S6W5|RS28_NEUCR/1e-27/40S ribosomal protein S28 OS=Neurospora crassa (strain ATCC 24698 / 74-OR23-1A / CBS 708.71 / DSM 1257 / FGSC 987) GN=rps-28 PE=3 SV=1	cmt:CCM_03602/1e-30/40S ribosomal protein S28; K02979 small subunit ribosomal protein S28e	SPCC285.15c/4e-26/---	NA	biological_process:GO:0006412//translation;cellular_component:GO:0005840//ribosome;molecular_function:GO:0003735//structural constituent of ribosome;
Unigene1260_All	Unigene1260_All	305.03	119.04	219.16	gi|597584293|ref|XP_007295203.1|/2.3053e-15/hypothetical protein MBM_07314 [Marssonina brunnea f. sp. &apos;multigermtubi&apos; MB_m1] &gt;gi|406861539|gb|EKD14593.1| hypothetical protein MBM_07314 [Marssonina brunnea f. sp. &apos;multigermtubi&apos; MB_m1]	gi|753718541|gb|CP009816.1|/4e-11/Botrytis cinerea B05.10 chromosome 12, complete sequence	NA	NA	NA	NA	cellular_component:GO:0016021//integral component of membrane;
Unigene2110_All	Unigene2110_All	304.38	344.55	241.02	gi|573979142|ref|XP_006667516.1|/1.09535e-85/hypothetical protein CCM_02301 [Cordyceps militaris CM01] &gt;gi|346324433|gb|EGX94030.1| hypothetical protein CCM_02301 [Cordyceps militaris CM01]	gi|163717268|gb|EU333919.1|/2e-10/Alternaria dauci clone Admic2 microsatellite sequence	sp|P08640|MUC1_YEAST/5e-14/Flocculation protein FLO11 OS=Saccharomyces cerevisiae (strain ATCC 204508 / S288c) GN=MUC1 PE=1 SV=2	aor:AOR_1_236094/4e-16/AO090120000140; actin associated protein Wsp1; K05747 Wiskott-Aldrich syndrome protein	Rv3876/4e-09/---	PF10342/1.3E-17/Ser-Thr-rich glycosyl-phosphatidyl-inositol-anchored membrane family	NA
CL402.Contig1_All	CL402.Contig1_All	301.19	262	276.6	gi|573986563|ref|XP_006671202.1|/8.46445e-55/RPEL repeat protein [Cordyceps militaris CM01] &gt;gi|346322239|gb|EGX91838.1| RPEL repeat protein [Cordyceps militaris CM01]	gi|573986562|ref|XM_006671139.1|/1e-122/Cordyceps militaris CM01 RPEL repeat protein (CCM_05995), partial mRNA	NA	wic:J056_004582/1e-11/T-complex protein 1 subunit zeta; K09498 T-complex protein 1 subunit zeta	NA	PS51073/9.169/RPEL repeat profile.	NA
Unigene2127_All	Unigene2127_All	300.74	328.14	393.75	gi|667651837|ref|XP_008597750.1|/9.69558e-31/ubiquinol-cytochrome C reductase [Beauveria bassiana ARSEF 2860] &gt;gi|400598784|gb|EJP66491.1| ubiquinol-cytochrome C reductase [Beauveria bassiana ARSEF 2860]	gi|667651836|ref|XM_008599528.1|/8e-62/Beauveria bassiana ARSEF 2860 ubiquinol-cytochrome C reductase partial mRNA	sp|O74433|QCR9_SCHPO/6e-06/Cytochrome b-c1 complex subunit 9 OS=Schizosaccharomyces pombe (strain 972 / ATCC 24843) GN=qcr9 PE=3 SV=2	act:ACLA_082250/1e-13/UQCRX/QCR9 like ubiquinol-cytochrome C reductase family protein; K00419 ubiquinol-cytochrome c reductase subunit 9	NA	NA	biological_process:GO:0006122//mitochondrial electron transport, ubiquinol to cytochrome c;cellular_component:GO:0005750//mitochondrial respiratory chain complex III;
Unigene3659_All	Unigene3659_All	300.25	354.87	255.13	gi|573988775|ref|XP_006672308.1|/2.09386e-135/hypothetical protein CCM_07107 [Cordyceps militaris CM01] &gt;gi|346321087|gb|EGX90687.1| hypothetical protein CCM_07107 [Cordyceps militaris CM01]	gi|573988774|ref|XM_006672245.1|/0.0/Cordyceps militaris CM01 hypothetical protein (CCM_07107), partial mRNA	NA	NA	NA	NA	NA
Unigene6613_All	Unigene6613_All	299.32	252.63	286.38	gi|573992297|ref|XP_006674069.1|/0/acetyl-coenzyme A synthetase [Cordyceps militaris CM01] &gt;gi|346319222|gb|EGX88824.1| acetyl-coenzyme A synthetase [Cordyceps militaris CM01]	gi|573992296|ref|XM_006674006.1|/0.0/Cordyceps militaris CM01 acetyl-coenzyme A synthetase (CCM_08870), partial mRNA	sp|P16929|ACSA_NEUCR/0.0/Acetyl-coenzyme A synthetase OS=Neurospora crassa (strain ATCC 24698 / 74-OR23-1A / CBS 708.71 / DSM 1257 / FGSC 987) GN=acu-5 PE=2 SV=2	cmt:CCM_08870/0.0/acetyl-coenzyme A synthetase; K01895 acetyl-CoA synthetase [EC:6.2.1.1]	YLR153c/0.0/---	PTHR24095/0.0/--	biological_process:GO:0019427//acetyl-CoA biosynthetic process from acetate;molecular_function:GO:0003987//acetate-CoA ligase activity;GO:0005524//ATP binding;GO:0016208//AMP binding;
Unigene3566_All	Unigene3566_All	299.19	323.22	300.3	gi|573993779|ref|XP_006674810.1|/0/UBX domain protein, putative [Cordyceps militaris CM01] &gt;gi|346318048|gb|EGX87653.1| UBX domain protein, putative [Cordyceps militaris CM01]	gi|573993776|ref|XM_006674746.1|/0.0/Cordyceps militaris CM01 60S acidic ribosomal protein P1 (CCM_09613), partial mRNA	sp|P50344|RLA1_DAVTA/9e-43/60S acidic ribosomal protein P1 OS=Davidiella tassiana GN=CLAH12 PE=1 SV=1	cmt:CCM_09613/1e-74/60S acidic ribosomal protein P1; K02942 large subunit ribosomal protein LP1	SPAC644.15/4e-37/---	PS00028/-/Zinc finger C2H2 type domain signature.	cellular_component:GO:0005634//nucleus;GO:0005829//cytosol;molecular_function:GO:0003677//DNA binding;GO:0046872//metal ion binding;
Unigene729_All	Unigene729_All	298.85	282.12	364.75	gi|573977012|ref|XP_006666451.1|/0/pyruvate decarboxylase [Cordyceps militaris CM01] &gt;gi|346326978|gb|EGX96574.1| pyruvate decarboxylase [Cordyceps militaris CM01]	gi|573977011|ref|XM_006666388.1|/0.0/Cordyceps militaris CM01 pyruvate decarboxylase (CCM_01231), partial mRNA	sp|Q4WXX9|PDC_ASPFU/0.0/Pyruvate decarboxylase OS=Neosartorya fumigata (strain ATCC MYA-4609 / Af293 / CBS 101355 / FGSC A1100) GN=pdcA PE=3 SV=1	cmt:CCM_01231/0.0/pyruvate decarboxylase; K01568 pyruvate decarboxylase [EC:4.1.1.1]	YLR134w/2e-155/---	PF02775/1.3E-17/Thiamine pyrophosphate enzyme, C-terminal TPP binding domain	molecular_function:GO:0000287//magnesium ion binding;GO:0016831//carboxy-lyase activity;GO:0030976//thiamine pyrophosphate binding;
Unigene7409_All	Unigene7409_All	297.37	298.16	251.79	gi|573976932|ref|XP_006666411.1|/0/Aconitase-like core [Cordyceps militaris CM01] &gt;gi|346326938|gb|EGX96534.1| Aconitase-like core [Cordyceps militaris CM01]	gi|573976931|ref|XM_006666348.1|/0.0/Cordyceps militaris CM01 Aconitase-like core (CCM_01191), partial mRNA	sp|Q4WLN1|ACON_ASPFU/0.0/Aconitate hydratase, mitochondrial OS=Neosartorya fumigata (strain ATCC MYA-4609 / Af293 / CBS 101355 / FGSC A1100) GN=acoA PE=1 SV=1	cmt:CCM_01191/0.0/Aconitase-like core; K01681 aconitate hydratase [EC:4.2.1.3]	YLR304c/0.0/---	PS01244/-/Aconitase family signature 2.	biological_process:GO:0006099//tricarboxylic acid cycle;GO:0000002//mitochondrial genome maintenance;cellular_component:GO:0042645//mitochondrial nucleoid;GO:0005829//cytosol;molecular_function:GO:0003690//double-stranded DNA binding;GO:0003994//aconitate hydratase activity;GO:0046872//metal ion binding;GO:0003697//single-stranded DNA binding;GO:0051539//4 iron, 4 sulfur cluster binding;
Unigene2708_All	Unigene2708_All	296.62	323.13	358.87	gi|573983659|ref|XP_006669750.1|/2.59212e-95/40S ribosomal protein S10 [Cordyceps militaris CM01] &gt;gi|346323569|gb|EGX93167.1| 40S ribosomal protein S10 [Cordyceps militaris CM01]	gi|573983658|ref|XM_006669687.1|/0.0/Cordyceps militaris CM01 40S ribosomal protein S10 (CCM_04539), partial mRNA	sp|O13614|RS10B_SCHPO/7e-45/40S ribosomal protein S10-B OS=Schizosaccharomyces pombe (strain 972 / ATCC 24843) GN=rps10b PE=3 SV=1	cmt:CCM_04539/2e-96/40S ribosomal protein S10; K02947 small subunit ribosomal protein S10e	SPBP22H7.08/2e-44/---	NA	cellular_component:GO:0005840//ribosome;
Unigene7023_All	Unigene7023_All	294.82	245.3	85.78	gi|573980245|ref|XP_006668067.1|/6.43215e-140/cell wall serine-threonine-rich galactomannoprotein Mp1 [Cordyceps militaris CM01] &gt;gi|346324984|gb|EGX94581.1| cell wall serine-threonine-rich galactomannoprotein Mp1 [Cordyceps militaris CM01]	gi|573980244|ref|XM_006668004.1|/0.0/Cordyceps militaris CM01 cell wall serine-threonine-rich galactomannoprotein Mp1 (CCM_02852), partial mRNA	sp|Q05164|HPF1_YEAST/6e-13/Haze protective factor 1 OS=Saccharomyces cerevisiae (strain ATCC 204508 / S288c) GN=HPF1 PE=1 SV=2	spo:SPAC23A1.17/7e-11/SH3 domain-containing protein; K20521 myosin tail region-interacting protein MTI1	DR0479/5e-09/---	PF12296/4.5E-11/Hydrophobic surface binding protein A	NA
Unigene1602_All	Unigene1602_All	293.4	336.49	589.59	gi|667658201|ref|XP_008600932.1|/0/Cytochrome P450 CYP684A2 [Beauveria bassiana ARSEF 2860] &gt;gi|400595645|gb|EJP63437.1| Cytochrome P450 CYP684A2 [Beauveria bassiana ARSEF 2860]	gi|667658200|ref|XM_008602710.1|/0.0/Beauveria bassiana ARSEF 2860 Cytochrome P450 CYP684A2 partial mRNA	sp|Q12608|STCB_EMENI/2e-59/Probable sterigmatocystin biosynthesis P450 monooxygenase STCB OS=Emericella nidulans (strain FGSC A4 / ATCC 38163 / CBS 112.46 / NRRL 194 / M139) GN=stcB PE=3 SV=2	vda:VDAG_07887/8e-53/benzoate 4-monooxygenase; K07824 benzoate 4-monooxygenase [EC:1.14.13.12]	VNG0422G/2e-23/---	PS00086/-/Cytochrome P450 cysteine heme-iron ligand signature.	biological_process:GO:0055114//oxidation-reduction process;cellular_component:GO:0016021//integral component of membrane;molecular_function:GO:0016705//oxidoreductase activity, acting on paired donors, with incorporation or reduction of molecular oxygen;GO:0020037//heme binding;GO:0005506//iron ion binding;GO:0004497//monooxygenase activity;
Unigene404_All	Unigene404_All	293.26	303.09	353.21	gi|573987645|ref|XP_006671743.1|/5.50812e-28/hypothetical protein CCM_06539 [Cordyceps militaris CM01] &gt;gi|346320520|gb|EGX90120.1| hypothetical protein CCM_06539 [Cordyceps militaris CM01]	gi|699037166|emb|HG970333.1|/2e-10/Fusarium graminearum chromosome 2, complete genome	NA	NA	NA	NA	NA
Unigene3828_All	Unigene3828_All	292.33	286.17	223.68	gi|573983351|ref|XP_006669596.1|/1.3587e-24/hypothetical protein CCM_04385 [Cordyceps militaris CM01] &gt;gi|346323415|gb|EGX93013.1| hypothetical protein CCM_04385 [Cordyceps militaris CM01]	gi|699037166|emb|HG970333.1|/6e-13/Fusarium graminearum chromosome 2, complete genome	NA	NA	NA	NA	NA
CL478.Contig1_All	CL478.Contig1_All	292.32	269.19	878.71	gi|573984641|ref|XP_006670241.1|/3.99319e-178/PLC-like phosphodiesterase, TIM beta/alpha-barrel domain [Cordyceps militaris CM01] &gt;gi|346324060|gb|EGX93658.1| PLC-like phosphodiesterase, TIM beta/alpha-barrel domain [Cordyceps militaris CM01]	gi|573984640|ref|XM_006670178.1|/0.0/Cordyceps militaris CM01 PLC-like phosphodiesterase, TIM beta/alpha-barrel domain (CCM_05033), partial mRNA	sp|P18899|DDR48_YEAST/3e-52/Stress protein DDR48 OS=Saccharomyces cerevisiae (strain ATCC 204508 / S288c) GN=DDR48 PE=1 SV=4	pcs:Pc13g12130/5e-37/Pc13g12130; K05857 phosphatidylinositol phospholipase C, delta [EC:3.1.4.11]	XF1267/1e-14/---	PS50008/32.191/Phosphatidylinositol-specific phospholipase Y-box domain profile.	biological_process:GO:0016042//lipid catabolic process;GO:0035556//intracellular signal transduction;cellular_component:GO:0005622//intracellular;molecular_function:GO:0004435//phosphatidylinositol phospholipase C activity;GO:0004871//signal transducer activity;
Unigene2861_All	Unigene2861_All	291.76	262.07	236.01	gi|667646635|ref|XP_008595149.1|/5.83235e-75/multiprotein bridging factor 1 [Beauveria bassiana ARSEF 2860] &gt;gi|400601152|gb|EJP68795.1| multiprotein bridging factor 1 [Beauveria bassiana ARSEF 2860]	gi|667646634|ref|XM_008596927.1|/1e-180/Beauveria bassiana ARSEF 2860 multiprotein bridging factor 1 partial mRNA	sp|Q53IP3|MBF1_GIBFU/2e-62/Multiprotein-bridging factor 1 OS=Gibberella fujikuroi GN=MBF1 PE=3 SV=1	pcs:Pc22g22070/3e-12/Pc22g22070; K11595 chromo domain-containing protein 1	SPBC83.17/9e-29/---	NA	biological_process:GO:0045944//positive regulation of transcription from RNA polymerase II promoter;cellular_component:GO:0005739//mitochondrion;molecular_function:GO:0003713//transcription coactivator activity;GO:0043565//sequence-specific DNA binding;
Unigene461_All	Unigene461_All	291.65	297.85	229.04	gi|573988905|ref|XP_006672373.1|/1.90077e-54/hypothetical protein CCM_07172 [Cordyceps militaris CM01] &gt;gi|346321152|gb|EGX90752.1| hypothetical protein CCM_07172 [Cordyceps militaris CM01]	gi|667654548|ref|XM_008600884.1|/7e-70/Beauveria bassiana ARSEF 2860 AN1-type zinc finger protein partial mRNA	sp|Q08422|YO052_YEAST/4e-17/AN1-type zinc finger protein YOR052C OS=Saccharomyces cerevisiae (strain ATCC 204508 / S288c) GN=YOR052C PE=1 SV=1	maj:MAA_02903/1e-31/AN1-type zinc finger protein; K07059 uncharacterized protein	YOR052c/1e-16/---	NA	biological_process:GO:0071243//cellular response to arsenic-containing substance;cellular_component:GO:0005829//cytosol;molecular_function:GO:0008270//zinc ion binding;
Unigene3052_All	Unigene3052_All	291.13	257.1	273.97	gi|573977578|ref|XP_006666734.1|/3.13855e-87/L-PSP endoribonuclease family protein, putative [Cordyceps militaris CM01] &gt;gi|346327261|gb|EGX96857.1| L-PSP endoribonuclease family protein, putative [Cordyceps militaris CM01]	gi|573977577|ref|XM_006666671.1|/0.0/Cordyceps militaris CM01 L-PSP endoribonuclease family protein, putative (CCM_01515), partial mRNA	NA	NA	slr0318/6e-19/---	NA	NA
Unigene1792_All	Unigene1792_All	290.64	221.89	283.58	gi|667656687|ref|XP_008600175.1|/1.47989e-45/peptidase inhibitor I9 [Beauveria bassiana ARSEF 2860] &gt;gi|400596378|gb|EJP64152.1| peptidase inhibitor I9 [Beauveria bassiana ARSEF 2860]	gi|573980498|ref|XM_006668115.1|/1e-117/Cordyceps militaris CM01 Proteinase inhibitor, propeptide (CCM_02963), partial mRNA	sp|O74989|YJZC_SCHPO/3e-09/Uncharacterized protein C338.12 OS=Schizosaccharomyces pombe (strain 972 / ATCC 24843) GN=SPCC338.12 PE=3 SV=1	NA	NA	NA	NA
Unigene3851_All	Unigene3851_All	289.6	293.78	323.36	gi|573993875|ref|XP_006674858.1|/1.5603e-52/prohibitin [Cordyceps militaris CM01] &gt;gi|346318096|gb|EGX87701.1| prohibitin [Cordyceps militaris CM01]	gi|573993874|ref|XM_006674795.1|/5e-97/Cordyceps militaris CM01 prohibitin (CCM_09662), partial mRNA	sp|P48503|QCR8_NEUCR/9e-33/Cytochrome b-c1 complex subunit 8 OS=Neurospora crassa (strain ATCC 24698 / 74-OR23-1A / CBS 708.71 / DSM 1257 / FGSC 987) GN=qcr-8 PE=1 SV=1	cmt:CCM_09662/2e-53/prohibitin; K17080 prohibitin 1	NA	NA	biological_process:GO:1902589//single-organism organelle organization;GO:0044767//single-organism developmental process;GO:0009060//aerobic respiration;GO:0007005//mitochondrion organization;GO:0048869//cellular developmental process;GO:1902600//hydrogen ion transmembrane transport;GO:0006122//mitochondrial electron transport, ubiquinol to cytochrome c;cellular_component:GO:0005750//mitochondrial…
Unigene4801_All	Unigene4801_All	288.66	333.09	349.04	gi|913764322|emb|CRK37135.1|/3.88488e-27/hypothetical protein BN1708_007325 [Verticillium longisporum]	gi|573977299|ref|XM_006666532.1|/3e-90/Cordyceps militaris CM01 40S ribosomal protein S29 (CCM_01376), partial mRNA	sp|Q9C2P2|RS29_NEUCR/4e-25/40S ribosomal protein S29 OS=Neurospora crassa (strain ATCC 24698 / 74-OR23-1A / CBS 708.71 / DSM 1257 / FGSC 987) GN=rps-29 PE=3 SV=1	cmt:CCM_01376/4e-28/40S ribosomal protein S29; K02980 small subunit ribosomal protein S29e	YDL061c/2e-20/---	NA	biological_process:GO:0006412//translation;cellular_component:GO:0005840//ribosome;molecular_function:GO:0003735//structural constituent of ribosome;
Unigene4502_All	Unigene4502_All	288.44	346.43	364.23	gi|701776374|gb|KGQ10258.1|/2.41943e-58/60S ribosomal protein L43 [Beauveria bassiana D1-5]	gi|667645058|ref|XM_008596139.1|/1e-126/Beauveria bassiana ARSEF 2860 60S ribosomal protein L43 partial mRNA	sp|Q6FRG6|RL43_CANGA/1e-35/60S ribosomal protein L43 OS=Candida glabrata (strain ATCC 2001 / CBS 138 / JCM 3761 / NBRC 0622 / NRRL Y-65) GN=RPL43 PE=3 SV=1	maw:MAC_03736/8e-45/60S ribosomal protein L37a; K02921 large subunit ribosomal protein L37Ae	YPR043w/1e-34/---	NA	biological_process:GO:0006412//translation;cellular_component:GO:0005840//ribosome;molecular_function:GO:0003735//structural constituent of ribosome;
Unigene2104_All	Unigene2104_All	287.53	132.89	212.51	gi|573977822|ref|XP_006666856.1|/1.0823e-33/dynamin GTPase, putative [Cordyceps militaris CM01] &gt;gi|346327383|gb|EGX96979.1| dynamin GTPase, putative [Cordyceps militaris CM01]	gi|573977821|ref|XM_006666793.1|/1e-116/Cordyceps militaris CM01 dynamin GTPase, putative (CCM_01638), partial mRNA	NA	NA	NA	NA	biological_process:GO:0006357//regulation of transcription from RNA polymerase II promoter;cellular_component:GO:0005634//nucleus;molecular_function:GO:0000981//RNA polymerase II transcription factor activity, sequence-specific DNA binding;GO:0008270//zinc ion binding;
Unigene3067_All	Unigene3067_All	286.72	337.29	304.67	gi|573980943|ref|XP_006668392.1|/3.22477e-47/60S ribosomal protein L37 [Cordyceps militaris CM01] &gt;gi|346325309|gb|EGX94906.1| 60S ribosomal protein L37 [Cordyceps militaris CM01]	gi|573980942|ref|XM_006668329.1|/1e-153/Cordyceps militaris CM01 60S ribosomal protein L37 (CCM_03177), partial mRNA	sp|Q9C0T1|RL37_EMENI/3e-37/60S ribosomal protein L37 OS=Emericella nidulans (strain FGSC A4 / ATCC 38163 / CBS 112.46 / NRRL 194 / M139) GN=rpl37 PE=3 SV=1	cmt:CCM_03177/3e-48/60S ribosomal protein L37; K02922 large subunit ribosomal protein L37e	YLR185w/2e-32/---	NA	biological_process:GO:0006412//translation;cellular_component:GO:0005840//ribosome;molecular_function:GO:0046872//metal ion binding;GO:0003735//structural constituent of ribosome;GO:0019843//rRNA binding;
CL140.Contig2_All	CL140.Contig2_All	286.7	280.18	285.32	gi|573982843|ref|XP_006669342.1|/0/RNP domain containing protein [Cordyceps militaris CM01] &gt;gi|346323160|gb|EGX92758.1| RNP domain containing protein [Cordyceps militaris CM01]	gi|573982842|ref|XM_006669279.1|/0.0/Cordyceps militaris CM01 RNP domain containing protein (CCM_04131), partial mRNA	sp|Q9HEQ9|TCG1_SCHPO/2e-29/Single-stranded TG1-3 DNA-binding protein OS=Schizosaccharomyces pombe (strain 972 / ATCC 24843) GN=tcg1 PE=1 SV=3	ncr:NCU03092/3e-16/nuclear localization sequence binding protein; K11294 nucleolin	alr4683/5e-12/---	PTHR24012:SF339/5.1E-74/--	cellular_component:GO:0005829//cytosol;molecular_function:GO:0000166//nucleotide binding;GO:0043047//single-stranded telomeric DNA binding;
Unigene3240_All	Unigene3240_All	286.48	357.72	342.04	gi|699036154|emb|CEF86029.1|/1.17123e-44/unnamed protein product [Fusarium graminearum]	gi|573985050|ref|XM_006670383.1|/1e-137/Cordyceps militaris CM01 40S ribosomal protein S27 (CCM_05238), partial mRNA	sp|Q7RVN2|RS27_NEUCR/7e-42/40S ribosomal protein S27 OS=Neurospora crassa (strain ATCC 24698 / 74-OR23-1A / CBS 708.71 / DSM 1257 / FGSC 987) GN=crp-6 PE=3 SV=1	cmt:CCM_05238/7e-42/40S ribosomal protein S27; K02978 small subunit ribosomal protein S27e	SPBC1685.10/2e-34/---	NA	biological_process:GO:0006412//translation;cellular_component:GO:0005840//ribosome;molecular_function:GO:0003735//structural constituent of ribosome;
Unigene4974_All	Unigene4974_All	285.79	323.94	256.41	gi|573986359|ref|XP_006671100.1|/5.43348e-107/60S ribosomal protein L6 [Cordyceps militaris CM01] &gt;gi|346322136|gb|EGX91735.1| 60S ribosomal protein L6 [Cordyceps militaris CM01]	gi|573986358|ref|XM_006671037.1|/0.0/Cordyceps militaris CM01 60S ribosomal protein L6 (CCM_05893), partial mRNA	sp|P05739|RL6B_YEAST/3e-48/60S ribosomal protein L6-B OS=Saccharomyces cerevisiae (strain ATCC 204508 / S288c) GN=RPL6B PE=1 SV=4	cmt:CCM_05893/5e-108/60S ribosomal protein L6; K02934 large subunit ribosomal protein L6e	YLR448w/6e-48/---	NA	biological_process:GO:0006412//translation;cellular_component:GO:0005840//ribosome;GO:0005730//nucleolus;GO:0005829//cytosol;molecular_function:GO:0003735//structural constituent of ribosome;
Unigene7072_All	Unigene7072_All	283.49	298.28	303.48	gi|573977894|ref|XP_006666892.1|/5.72436e-135/triosephosphate isomerase [Cordyceps militaris CM01] &gt;gi|346327419|gb|EGX97015.1| triosephosphate isomerase [Cordyceps militaris CM01]	gi|573977893|ref|XM_006666829.1|/0.0/Cordyceps militaris CM01 triosephosphate isomerase (CCM_01674), partial mRNA	sp|P04828|TPIS_EMENI/3e-95/Triosephosphate isomerase OS=Emericella nidulans (strain FGSC A4 / ATCC 38163 / CBS 112.46 / NRRL 194 / M139) GN=tpiA PE=3 SV=1	cmt:CCM_01674/5e-136/triosephosphate isomerase; K01803 triosephosphate isomerase (TIM) [EC:5.3.1.1]	SPCC24B10.21/1e-78/---	PS00171/-/Triosephosphate isomerase active site.	biological_process:GO:0006098//pentose-phosphate shunt;GO:0006094//gluconeogenesis;GO:0006096//glycolytic process;molecular_function:GO:0004807//triose-phosphate isomerase activity;
Unigene2462_All	Unigene2462_All	282.85	335.34	325.1	gi|573988527|ref|XP_006672184.1|/0/glucose-6-phosphate 1-dehydrogenase (G6PD) [Cordyceps militaris CM01] &gt;gi|346320963|gb|EGX90563.1| glucose-6-phosphate 1-dehydrogenase (G6PD) [Cordyceps militaris CM01]	gi|573988526|ref|XM_006672121.1|/0.0/Cordyceps militaris CM01 glucose-6-phosphate 1-dehydrogenase (G6PD) (CCM_06983), partial mRNA	sp|P48826|G6PD_ASPNG/0.0/Glucose-6-phosphate 1-dehydrogenase OS=Aspergillus niger GN=gsdA PE=2 SV=1	cmt:CCM_06983/0.0/glucose-6-phosphate 1-dehydrogenase (G6PD); K00036 glucose-6-phosphate 1-dehydrogenase [EC:1.1.1.49 1.1.1.363]	YNL241c/3e-169/---	PF00479/1.4E-64/Glucose-6-phosphate dehydrogenase, NAD binding domain	biological_process:GO:0006006//glucose metabolic process;GO:0006098//pentose-phosphate shunt;GO:0055114//oxidation-reduction process;molecular_function:GO:0050661//NADP binding;GO:0004345//glucose-6-phosphate dehydrogenase activity;
CL338.Contig3_All	CL338.Contig3_All	282.36	127.09	114.42	gi|573976370|ref|XP_006666130.1|/0/period circadian protein, putative [Cordyceps militaris CM01] &gt;gi|346326657|gb|EGX96253.1| period circadian protein, putative [Cordyceps militaris CM01]	gi|28950049|emb|BX294013.1|/3e-18/Neurospora crassa DNA linkage group V Cosmid contig X4G11	sp|Q8TFG4|YL54_SCHPO/1e-19/Uncharacterized protein PB18E9.04c OS=Schizosaccharomyces pombe (strain 972 / ATCC 24843) GN=SPAPB18E9.04c PE=4 SV=1	dha:DEHA2F13860g/1e-14/DEHA2F13860p; K14297 nuclear pore complex protein Nup98-Nup96	RSc0887/4e-13/---	NA	NA
Unigene7248_All	Unigene7248_All	281.75	348.96	294.55	gi|573985871|ref|XP_006670856.1|/3.17182e-99/60S ribosomal protein L17 [Cordyceps militaris CM01] &gt;gi|346321892|gb|EGX91491.1| 60S ribosomal protein L17 [Cordyceps militaris CM01]	gi|573985870|ref|XM_006670793.1|/0.0/Cordyceps militaris CM01 60S ribosomal protein L17 (CCM_05649), partial mRNA	sp|Q9HE25|RL17_NEUCR/3e-84/60S ribosomal protein L17 OS=Neurospora crassa (strain ATCC 24698 / 74-OR23-1A / CBS 708.71 / DSM 1257 / FGSC 987) GN=rpl-17 PE=3 SV=1	cmt:CCM_05649/3e-100/60S ribosomal protein L17; K02880 large subunit ribosomal protein L17e	SPBC2F12.04/1e-58/---	PF00237/4.5E-34/Ribosomal protein L22p/L17e	biological_process:GO:0006412//translation;cellular_component:GO:0015934//large ribosomal subunit;molecular_function:GO:0003735//structural constituent of ribosome;
Unigene4977_All	Unigene4977_All	280.83	211.27	480.93	gi|573987581|ref|XP_006671711.1|/1.02836e-40/hypothetical protein CCM_06507 [Cordyceps militaris CM01] &gt;gi|346320487|gb|EGX90087.1| hypothetical protein CCM_06507 [Cordyceps militaris CM01]	gi|759000400|ref|XM_954460.2|/5e-07/Neurospora crassa OR74A vacuolar protein sorting-associated protein 74 mRNA	NA	adl:AURDEDRAFT_111524/4e-06/hypothetical protein; K05747 Wiskott-Aldrich syndrome protein	NA	NA	cellular_component:GO:0016021//integral component of membrane;
Unigene1475_All	Unigene1475_All	280.28	279.32	198.55	gi|573976494|ref|XP_006666192.1|/0/cell division control protein Cdc48 [Cordyceps militaris CM01] &gt;gi|346326719|gb|EGX96315.1| cell division control protein Cdc48 [Cordyceps militaris CM01]	gi|573976493|ref|XM_006666129.1|/0.0/Cordyceps militaris CM01 cell division control protein Cdc48 (CCM_00971), partial mRNA	sp|Q5AWS6|CDC48_EMENI/0.0/Cell division control protein 48 OS=Emericella nidulans (strain FGSC A4 / ATCC 38163 / CBS 112.46 / NRRL 194 / M139) GN=cdc48 PE=1 SV=2	cmt:CCM_00971/0.0/cell division control protein Cdc48; K13525 transitional endoplasmic reticulum ATPase	YDL126c/0.0/---	PTHR23077/0.0/--	biological_process:GO:1990116//ribosome-associated ubiquitin-dependent protein catabolic process;GO:0016485//protein processing;GO:0071712//ER-associated misfolded protein catabolic process;GO:0034727//piecemeal microautophagy of nucleus;GO:1990171//SCF complex disassembly in response to cadmium stress;GO:0070651//nonfunctional rRNA decay;GO:0030970//retrograde protein transport, ER to cytosol;GO…
Unigene5539_All	Unigene5539_All	279.38	310.68	298.94	gi|573979142|ref|XP_006667516.1|/2.90384e-43/hypothetical protein CCM_02301 [Cordyceps militaris CM01] &gt;gi|346324433|gb|EGX94030.1| hypothetical protein CCM_02301 [Cordyceps militaris CM01]	gi|702067518|emb|FO906717.1|/2e-13/Leptosphaeria maculans brassicae wa74_scaffold00369 complete sequence	sp|Q7SAT8|PAN1_NEUCR/2e-15/Actin cytoskeleton-regulatory complex protein pan-1 OS=Neurospora crassa (strain ATCC 24698 / 74-OR23-1A / CBS 708.71 / DSM 1257 / FGSC 987) GN=pan-1 PE=3 SV=1	cci:CC1G_15535/3e-19/Setd1a protein; K11422 histone-lysine N-methyltransferase SETD1 [EC:2.1.1.43]	XF0818/8e-17/---	NA	NA
Unigene185_All	Unigene185_All	278.87	405.07	11.44	gi|573986801|ref|XP_006671321.1|/5.37131e-53/hypothetical protein CCM_06117 [Cordyceps militaris CM01] &gt;gi|346322358|gb|EGX91957.1| hypothetical protein CCM_06117 [Cordyceps militaris CM01]	gi|409191683|gb|JX235932.1|/2e-50/Beauveria bassiana isolate Bb0062 Arv1-like family protein (ARV1) gene, complete cds	NA	NA	NA	NA	NA
Unigene5333_All	Unigene5333_All	278.59	228.16	300.89	gi|573979510|ref|XP_006667700.1|/3.82886e-39/iron/copper transporter Atx1, putative [Cordyceps militaris CM01] &gt;gi|346324617|gb|EGX94214.1| iron/copper transporter Atx1, putative [Cordyceps militaris CM01]	gi|667655308|ref|XM_008601264.1|/8e-76/Beauveria bassiana ARSEF 2860 heavy-metal-associated domain-containing protein partial mRNA	sp|P38636|ATX1_YEAST/2e-13/Metal homeostasis factor ATX1 OS=Saccharomyces cerevisiae (strain ATCC 204508 / S288c) GN=ATX1 PE=1 SV=1	mbe:MBM_05344/3e-22/iron copper transporter; K07213 copper chaperone	YNL259c/4e-13/---	NA	biological_process:GO:0006825//copper ion transport;molecular_function:GO:0046872//metal ion binding;
Unigene8326_All	Unigene8326_All	278.28	288.03	443.23	gi|573977278|ref|XP_006666584.1|/0/camp independent regulatory protein [Cordyceps militaris CM01] &gt;gi|346327111|gb|EGX96707.1| camp independent regulatory protein [Cordyceps militaris CM01]	gi|573977277|ref|XM_006666521.1|/0.0/Cordyceps militaris CM01 camp independent regulatory protein (CCM_01365), partial mRNA	sp|Q10294|PAC2_SCHPO/6e-50/cAMP-independent regulatory protein pac2 OS=Schizosaccharomyces pombe (strain 972 / ATCC 24843) GN=pac2 PE=2 SV=1	ang:ANI_1_1692024/4e-07/An02g12210; transcription factor; K09265 transcription factor RLM1	SPAC31G5.11/1e-49/---	PF09729/1.6E-8/Gti1/Pac2 family	NA
CL1304.Contig2_All	CL1304.Contig2_All	277.32	317.56	205.9	gi|573980346|ref|XP_006668108.1|/3.95572e-175/covalently-linked cell wall protein [Cordyceps militaris CM01] &gt;gi|346325025|gb|EGX94622.1| covalently-linked cell wall protein [Cordyceps militaris CM01]	gi|573980345|ref|XM_006668045.1|/0.0/Cordyceps militaris CM01 covalently-linked cell wall protein (CCM_02893), partial mRNA	sp|P47001|CIS3_YEAST/2e-30/Cell wall mannoprotein CIS3 OS=Saccharomyces cerevisiae (strain ATCC 204508 / S288c) GN=CIS3 PE=1 SV=1	lth:KLTH0G17886g/3e-15/KLTH0G17886p; K19475 WAS/WASL-interacting protein	YPO2725/1e-10/---	NA	cellular_component:GO:0005618//cell wall;GO:0016021//integral component of membrane;molecular_function:GO:0005199//structural constituent of cell wall;
Unigene8520_All	Unigene8520_All	276.94	282.72	339.38	gi|573992923|ref|XP_006674382.1|/0/actin related protein 2/3 complex subunit [Cordyceps militaris CM01] &gt;gi|346318446|gb|EGX88049.1| actin related protein 2/3 complex subunit [Cordyceps militaris CM01]	gi|573992922|ref|XM_006674319.1|/0.0/Cordyceps militaris CM01 actin related protein 2/3 complex subunit (CCM_09185), partial mRNA	sp|P78774|ARPC1_SCHPO/8e-112/Actin-related protein 2/3 complex subunit 1 OS=Schizosaccharomyces pombe (strain 972 / ATCC 24843) GN=arc1 PE=1 SV=3	cmt:CCM_09185/0.0/actin related protein 2/3 complex subunit; K05757 actin related protein 2/3 complex, subunit 1A/1B	YBR234c/9e-82/---	PS50082/12.313/Trp-Asp (WD) repeats profile.	biological_process:GO:0034314//Arp2/3 complex-mediated actin nucleation;GO:0000281//mitotic cytokinesis;cellular_component:GO:0051286//cell tip;GO:0005885//Arp2/3 protein complex;GO:0032153//cell division site;GO:0030479//actin cortical patch;GO:0005829//cytosol;molecular_function:GO:0043130//ubiquitin binding;
Unigene7530_All	Unigene7530_All	275.49	282.41	326.43	gi|573992893|ref|XP_006674367.1|/8.15952e-90/SNARE protein Snc2, putative [Cordyceps militaris CM01] &gt;gi|346318431|gb|EGX88034.1| SNARE protein Snc2, putative [Cordyceps militaris CM01]	gi|667652458|ref|XM_008599839.1|/1e-108/Beauveria bassiana ARSEF 2860 synaptobrevin-like protein partial mRNA	sp|Q92356|SYB1_SCHPO/4e-41/Synaptobrevin homolog 1 OS=Schizosaccharomyces pombe (strain 972 / ATCC 24843) GN=syb1 PE=3 SV=1	vda:VDAG_02648/2e-47/synaptobrevin; K08513 vesicle-associated membrane protein 4	SPAC6G9.11/9e-41/---	NA	biological_process:GO:0016192//vesicle-mediated transport;cellular_component:GO:0016021//integral component of membrane;
Unigene7171_All	Unigene7171_All	274.05	330.45	275.94	gi|573986909|ref|XP_006671375.1|/1.56769e-94/60S ribosomal protein L11 [Cordyceps militaris CM01] &gt;gi|346322412|gb|EGX92011.1| 60S ribosomal protein L11 [Cordyceps militaris CM01]	gi|573986908|ref|XM_006671312.1|/0.0/Cordyceps militaris CM01 60S ribosomal protein L11 (CCM_06171), partial mRNA	sp|Q7RVN0|RL11_NEUCR/3e-87/60S ribosomal protein L11 OS=Neurospora crassa (strain ATCC 24698 / 74-OR23-1A / CBS 708.71 / DSM 1257 / FGSC 987) GN=rpl-11 PE=3 SV=2	cmt:CCM_06171/1e-95/60S ribosomal protein L11; K02868 large subunit ribosomal protein L11e	YPR102c/3e-74/---	NA	biological_process:GO:0006412//translation;cellular_component:GO:0005840//ribosome;molecular_function:GO:0003735//structural constituent of ribosome;
Unigene2882_All	Unigene2882_All	273.52	243.23	285.21	gi|573985693|ref|XP_006670767.1|/3.92711e-69/STF2-like protein [Cordyceps militaris CM01] &gt;gi|346321803|gb|EGX91402.1| STF2-like protein [Cordyceps militaris CM01]	gi|573985692|ref|XM_006670704.1|/0.0/Cordyceps militaris CM01 STF2-like protein (CCM_05560), partial mRNA	NA	NA	NA	NA	NA
Unigene4739_All	Unigene4739_All	272.61	315.69	356.61	gi|573988481|ref|XP_006672161.1|/2.1844e-97/hypothetical protein CCM_06960 [Cordyceps militaris CM01] &gt;gi|346320940|gb|EGX90540.1| hypothetical protein CCM_06960 [Cordyceps militaris CM01]	gi|573988480|ref|XM_006672098.1|/0.0/Cordyceps militaris CM01 hypothetical protein (CCM_06960), partial mRNA	sp|Q52B63|CWC22_MAGO7/5e-07/Pre-mRNA-splicing factor CWC22 OS=Magnaporthe oryzae (strain 70-15 / ATCC MYA-4617 / FGSC 8958) GN=CWC22 PE=3 SV=1	lbc:LACBIDRAFT_311817/3e-09/WASP-interacting protein VRP1/WIP; K19475 WAS/WASL-interacting protein	Rv3876/2e-06/---	NA	NA
Unigene5029_All	Unigene5029_All	271.8	216.05	93.6	gi|573975176|ref|XP_006665533.1|/0/hydroxymethylglutaryl-CoA synthase [Cordyceps militaris CM01] &gt;gi|346326060|gb|EGX95656.1| hydroxymethylglutaryl-CoA synthase [Cordyceps militaris CM01]	gi|573975175|ref|XM_006665470.1|/0.0/Cordyceps militaris CM01 hydroxymethylglutaryl-CoA synthase (CCM_00310), partial mRNA	sp|P54874|HMCS_SCHPO/2e-163/Hydroxymethylglutaryl-CoA synthase OS=Schizosaccharomyces pombe (strain 972 / ATCC 24843) GN=hcs1 PE=1 SV=1	cmt:CCM_00310/0.0/hydroxymethylglutaryl-CoA synthase; K01641 hydroxymethylglutaryl-CoA synthase [EC:2.3.3.10]	SPAC4F8.14c/6e-163/---	PF08540/7.8E-102/Hydroxymethylglutaryl-coenzyme A synthase C terminal	biological_process:GO:0008299//isoprenoid biosynthetic process;molecular_function:GO:0004421//hydroxymethylglutaryl-CoA synthase activity;
Unigene6784_All	Unigene6784_All	271.58	294.7	329.01	gi|573984319|ref|XP_006670080.1|/6.5095e-178/SCP-like extracellular protein, putative [Cordyceps militaris CM01] &gt;gi|346323899|gb|EGX93497.1| SCP-like extracellular protein, putative [Cordyceps militaris CM01]	gi|573984318|ref|XM_006670017.1|/0.0/Cordyceps militaris CM01 SCP-like extracellular protein, putative (CCM_04871), partial mRNA	sp|P47032|PRY1_YEAST/4e-29/Protein PRY1 OS=Saccharomyces cerevisiae (strain ATCC 204508 / S288c) GN=PRY1 PE=1 SV=1	sce:YIR019C/2e-13/FLO11, MUC1, STA4; Flo11p; K19851 flocculation protein FLO11	YJL079c/9e-29/---	PS01009/-/CRISP family signature 1.	cellular_component:GO:0005576//extracellular region;
Unigene4883_All	Unigene4883_All	270.79	302.93	274.54	gi|573976038|ref|XP_006665964.1|/0/oxysterol binding protein (Osh5), putative [Cordyceps militaris CM01] &gt;gi|346326491|gb|EGX96087.1| oxysterol binding protein (Osh5), putative [Cordyceps militaris CM01]	gi|573976039|ref|XM_006665902.1|/0.0/Cordyceps militaris CM01 fructose-bisphosphate aldolase, class II (CCM_00743), partial mRNA	sp|Q9HGY9|ALF_ASPOR/4e-174/Fructose-bisphosphate aldolase OS=Aspergillus oryzae (strain ATCC 42149 / RIB 40) GN=fbaA PE=2 SV=2	cmt:CCM_00743/0.0/fructose-bisphosphate aldolase, class II; K01624 fructose-bisphosphate aldolase, class II [EC:4.1.2.13]	YKL060c/4e-144/---	PTHR10972/8.2E-168/--	biological_process:GO:0006094//gluconeogenesis;GO:0006096//glycolytic process;cellular_component:GO:0005634//nucleus;GO:0005829//cytosol;GO:0005739//mitochondrion;molecular_function:GO:0004332//fructose-bisphosphate aldolase activity;GO:0008270//zinc ion binding;
CL1392.Contig1_All	CL1392.Contig1_All	270.37	282.03	304.96	gi|573986943|ref|XP_006671392.1|/3.38447e-123/GTP-binding nuclear protein GSP1/Ran [Cordyceps militaris CM01] &gt;gi|667658783|ref|XP_008601223.1| GTP-binding nuclear protein GSP1/Ran [Beauveria bassiana ARSEF 2860] &gt;gi|346322429|gb|EGX92028.1| GTP-binding nuclear protein GSP1/Ran [Cordyceps militaris CM01] &gt;gi|400595294|gb|EJP63099.1| GTP-binding nuclear protein GSP1/Ran [Beauveria bassian…	gi|573986942|ref|XM_006671329.1|/0.0/Cordyceps militaris CM01 GTP-binding nuclear protein GSP1/Ran (CCM_06188), partial mRNA	sp|Q7RVL0|GSP1_NEUCR/2e-111/GTP-binding nuclear protein GSP1/Ran OS=Neurospora crassa (strain ATCC 24698 / 74-OR23-1A / CBS 708.71 / DSM 1257 / FGSC 987) GN=ran PE=2 SV=1	cmt:CCM_06188/3e-124/GTP-binding nuclear protein GSP1/Ran; K07936 GTP-binding nuclear protein Ran	ECU04g1560/7e-41/---	NA	biological_process:GO:0010972//negative regulation of G2/M transition of mitotic cell cycle;GO:0006886//intracellular protein transport;GO:0016973//poly(A)+ mRNA export from nucleus;GO:0007264//small GTPase mediated signal transduction;cellular_component:GO:0005634//nucleus;GO:0005829//cytosol;molecular_function:GO:0003924//GTPase activity;GO:0005525//GTP binding;
Unigene6456_All	Unigene6456_All	270.08	271.12	243.69	gi|573992235|ref|XP_006674038.1|/6.52916e-11/hypothetical protein CCM_08839 [Cordyceps militaris CM01] &gt;gi|346319191|gb|EGX88793.1| hypothetical protein CCM_08839 [Cordyceps militaris CM01]	gi|573992234|ref|XM_006673975.1|/4e-53/Cordyceps militaris CM01 hypothetical protein (CCM_08839), partial mRNA	NA	NA	NA	NA	NA
Unigene736_All	Unigene736_All	269.95	243.96	267.33	gi|573985399|ref|XP_006670620.1|/0/conserved lysine-rich protein, putative [Cordyceps militaris CM01] &gt;gi|346321656|gb|EGX91255.1| conserved lysine-rich protein, putative [Cordyceps militaris CM01]	gi|667643628|ref|XM_008595424.1|/0.0/Beauveria bassiana ARSEF 2860 immunogenic protein partial mRNA	sp|A2QBZ0|SEC31_ASPNC/1e-13/Protein transport protein sec31 OS=Aspergillus niger (strain CBS 513.88 / FGSC A1513) GN=sec31 PE=3 SV=1	cci:CC1G_15535/2e-14/Setd1a protein; K11422 histone-lysine N-methyltransferase SETD1 [EC:2.1.1.43]	PA2976/2e-09/---	NA	NA
Unigene1193_All	Unigene1193_All	269.28	289.65	309.22	gi|573986251|ref|XP_006671046.1|/6.9232e-79/60S ribosomal protein L23 [Cordyceps militaris CM01] &gt;gi|346322082|gb|EGX91681.1| 60S ribosomal protein L23 [Cordyceps militaris CM01]	gi|573986250|ref|XM_006670983.1|/0.0/Cordyceps militaris CM01 60S ribosomal protein L23 (CCM_05839), partial mRNA	sp|P51997|RL25_PUCGR/9e-47/60S ribosomal protein L25 OS=Puccinia graminis PE=2 SV=2	cmt:CCM_05839/6e-80/60S ribosomal protein L23; K02893 large subunit ribosomal protein L23Ae	SPBC4F6.04/1e-42/---	NA	biological_process:GO:0006412//translation;cellular_component:GO:0005840//ribosome;molecular_function:GO:0000166//nucleotide binding;GO:0003735//structural constituent of ribosome;
Unigene7231_All	Unigene7231_All	268.61	287	852.01	gi|573991691|ref|XP_006673766.1|/2.66311e-44/hypothetical protein CCM_08566 [Cordyceps militaris CM01] &gt;gi|346318919|gb|EGX88521.1| hypothetical protein CCM_08566 [Cordyceps militaris CM01]	gi|573991690|ref|XM_006673703.1|/1e-133/Cordyceps militaris CM01 hypothetical protein (CCM_08566), partial mRNA	NA	NA	NA	NA	NA
Unigene2675_All	Unigene2675_All	268.08	205.6	369.08	gi|573984369|ref|XP_006670105.1|/0/sugar transporter, putative [Cordyceps militaris CM01] &gt;gi|346323924|gb|EGX93522.1| sugar transporter, putative [Cordyceps militaris CM01]	gi|667657164|ref|XM_008602192.1|/0.0/Beauveria bassiana ARSEF 2860 glucose transporter partial mRNA	sp|P49374|HGT1_KLULA/3e-128/High-affinity glucose transporter OS=Kluyveromyces lactis (strain ATCC 8585 / CBS 2359 / DSM 70799 / NBRC 1267 / NRRL Y-1140 / WM37) GN=HGT1 PE=3 SV=1	dha:DEHA2C11374g/8e-64/DEHA2C11374p; K08139 MFS transporter, SP family, sugar:H+ symporter	BS_araE/8e-62/---	PS00216/-/Sugar transport proteins signature 1.	biological_process:GO:0008643//carbohydrate transport;GO:0055085//transmembrane transport;cellular_component:GO:0016021//integral component of membrane;molecular_function:GO:0022891//substrate-specific transmembrane transporter activity;
Unigene7509_All	Unigene7509_All	267.45	266.31	234.69	gi|573975920|ref|XP_006665905.1|/0/negative regulator of sexual conjugation and meiosis [Cordyceps militaris CM01] &gt;gi|346326432|gb|EGX96028.1| negative regulator of sexual conjugation and meiosis [Cordyceps militaris CM01]	gi|573975919|ref|XM_006665842.1|/0.0/Cordyceps militaris CM01 negative regulator of sexual conjugation and meiosis (CCM_00683), partial mRNA	sp|P08092|RAN1_SCHPO/4e-80/Negative regulator of sexual conjugation and meiosis OS=Schizosaccharomyces pombe (strain 972 / ATCC 24843) GN=ran1 PE=1 SV=2	aor:AOR_1_1504014/8e-29/AO090026000841; serine/threonine-protein kinase chk2 (cds1); K06641 serine/threonine-protein kinase Chk2 [EC:2.7.11.1]	BS_yloP_1/2e-18/---	PF00069/1.1E-56/Protein kinase domain	biological_process:GO:0042992//negative regulation of transcription factor import into nucleus;GO:0060240//negative regulation of signal transduction involved in conjugation with cellular fusion;GO:0046777//protein autophosphorylation;GO:0018107//peptidyl-threonine phosphorylation;GO:0000122//negative regulation of transcription from RNA polymerase II promoter;GO:0045835//negative regulation of m…
Unigene1191_All	Unigene1191_All	267.1	446.25	608.73	gi|573986773|ref|XP_006671307.1|/4.0257e-100/perilipin-like protein MPL1 [Cordyceps militaris CM01] &gt;gi|346322344|gb|EGX91943.1| perilipin-like protein MPL1 [Cordyceps militaris CM01]	gi|573986772|ref|XM_006671244.1|/0.0/Cordyceps militaris CM01 perilipin-like protein MPL1 (CCM_06103), partial mRNA	sp|Q8TFG4|YL54_SCHPO/5e-14/Uncharacterized protein PB18E9.04c OS=Schizosaccharomyces pombe (strain 972 / ATCC 24843) GN=SPAPB18E9.04c PE=4 SV=1	ani:AN8241.2/1e-13/similar to chitinase; K01183 chitinase [EC:3.2.1.14]	SPBC28F2.12/2e-09/---	NA	NA
Unigene2262_All	Unigene2262_All	265.56	124.8	36.98	NA	NA	NA	NA	NA	NA	NA
CL1319.Contig1_All	CL1319.Contig1_All	265.23	331.79	261.41	gi|573977766|ref|XP_006666828.1|/2.10959e-138/60S ribosomal protein L7 [Cordyceps militaris CM01] &gt;gi|346327355|gb|EGX96951.1| 60S ribosomal protein L7 [Cordyceps militaris CM01]	gi|573977765|ref|XM_006666765.1|/0.0/Cordyceps militaris CM01 60S ribosomal protein L7 (CCM_01610), partial mRNA	sp|Q7SBD5|RL7_NEUCR/4e-119/60S ribosomal protein L7 OS=Neurospora crassa (strain ATCC 24698 / 74-OR23-1A / CBS 708.71 / DSM 1257 / FGSC 987) GN=rpl-7 PE=3 SV=2	cmt:CCM_01610/2e-139/60S ribosomal protein L7; K02937 large subunit ribosomal protein L7e	SPBC18H10.12c/1e-90/---	PF00327/1.1E-18/Ribosomal protein L30p/L7e	cellular_component:GO:0005840//ribosome;
Unigene1409_All	Unigene1409_All	264.68	227.03	156.95	gi|573987355|ref|XP_006671598.1|/0/mitochondrial protein import protein MAS5 [Cordyceps militaris CM01] &gt;gi|346322635|gb|EGX92234.1| mitochondrial protein import protein MAS5 [Cordyceps militaris CM01]	gi|573987354|ref|XM_006671535.1|/0.0/Cordyceps militaris CM01 mitochondrial protein import protein MAS5 (CCM_06395), partial mRNA	sp|O74752|MAS5_SCHPO/2e-108/Mitochondrial protein import protein mas5 OS=Schizosaccharomyces pombe (strain 972 / ATCC 24843) GN=mas5 PE=3 SV=1	cmt:CCM_06395/0.0/mitochondrial protein import protein MAS5; K09503 DnaJ homolog subfamily A member 2	SPBC1734.11/5e-108/---	PF00684/2.1E-10/DnaJ central domain	biological_process:GO:1900035//negative regulation of cellular response to heat;GO:0006457//protein folding;GO:0000226//microtubule cytoskeleton organization;cellular_component:GO:0005634//nucleus;molecular_function:GO:0005524//ATP binding;GO:0031072//heat shock protein binding;GO:0046872//metal ion binding;GO:0051082//unfolded protein binding;
CL1956.Contig2_All	CL1956.Contig2_All	264.12	312.91	271.83	gi|573989421|ref|XP_006672631.1|/0/Fungal transcriptional regulatory protein [Cordyceps militaris CM01] &gt;gi|346319574|gb|EGX89175.1| Fungal transcriptional regulatory protein [Cordyceps militaris CM01]	gi|573989420|ref|XM_006672568.1|/0.0/Cordyceps militaris CM01 Fungal transcriptional regulatory protein (CCM_07427), partial mRNA	sp|P23704|ATPB_NEUCR/0.0/ATP synthase subunit beta, mitochondrial OS=Neurospora crassa (strain ATCC 24698 / 74-OR23-1A / CBS 708.71 / DSM 1257 / FGSC 987) GN=atp-2 PE=2 SV=1	cmt:CCM_07426/0.0/ATP synthase beta chain; K02133 F-type H+-transporting ATPase subunit beta [EC:3.6.3.14]	SPAC222.12c/0.0/---	PTHR31263:SF5/3.0E-17/--	biological_process:GO:0042776//mitochondrial ATP synthesis coupled proton transport;GO:0015991//ATP hydrolysis coupled proton transport;GO:0006357//regulation of transcription from RNA polymerase II promoter;cellular_component:GO:0005634//nucleus;GO:0005754//mitochondrial proton-transporting ATP synthase, catalytic core;molecular_function:GO:0000981//RNA polymerase II transcription factor activit…
Unigene1599_All	Unigene1599_All	263.71	307.67	327.31	gi|573984829|ref|XP_006670335.1|/0/aldehyde dehydrogenase [Cordyceps militaris CM01] &gt;gi|346321371|gb|EGX90970.1| aldehyde dehydrogenase [Cordyceps militaris CM01]	gi|573984828|ref|XM_006670272.1|/0.0/Cordyceps militaris CM01 aldehyde dehydrogenase (CCM_05126), partial mRNA	sp|P40108|ALDH_DAVTA/0.0/Aldehyde dehydrogenase OS=Davidiella tassiana GN=CLAH10 PE=1 SV=2	cmt:CCM_05126/0.0/aldehyde dehydrogenase; K00128 aldehyde dehydrogenase (NAD+) [EC:1.2.1.3]	SPAC9E9.09c/1e-175/---	NA	biological_process:GO:0055114//oxidation-reduction process;cellular_component:GO:0005634//nucleus;GO:0005794//Golgi apparatus;GO:0005829//cytosol;molecular_function:GO:0016620//oxidoreductase activity, acting on the aldehyde or oxo group of donors, NAD or NADP as acceptor;
CL2113.Contig2_All	CL2113.Contig2_All	262.57	282.9	313.87	gi|573981371|ref|XP_006668606.1|/2.54211e-88/ATP synthase D chain [Cordyceps militaris CM01] &gt;gi|346325523|gb|EGX95120.1| ATP synthase D chain [Cordyceps militaris CM01]	gi|573981370|ref|XM_006668543.1|/0.0/Cordyceps militaris CM01 ATP synthase D chain (CCM_03392), partial mRNA	sp|Q7SI16|ATP7_NEUCR/7e-73/ATP synthase subunit d, mitochondrial OS=Neurospora crassa (strain ATCC 24698 / 74-OR23-1A / CBS 708.71 / DSM 1257 / FGSC 987) GN=atp7 PE=3 SV=1	cmt:CCM_03392/2e-89/ATP synthase D chain; K02138 F-type H+-transporting ATPase subunit d	YDR092w/6e-61/---	NA	biological_process:GO:0015986//ATP synthesis coupled proton transport;GO:0006461//protein complex assembly;cellular_component:GO:0000274//mitochondrial proton-transporting ATP synthase, stator stalk;molecular_function:GO:0046933//proton-transporting ATP synthase activity, rotational mechanism;GO:0046961//proton-transporting ATPase activity, rotational mechanism;
Unigene5890_All	Unigene5890_All	262.18	263.85	235.41	gi|573992339|ref|XP_006674090.1|/0/O-acetylhomoserine-lyase [Cordyceps militaris CM01] &gt;gi|346319243|gb|EGX88845.1| O-acetylhomoserine-lyase [Cordyceps militaris CM01]	gi|573992338|ref|XM_006674027.1|/0.0/Cordyceps militaris CM01 O-acetylhomoserine-lyase (CCM_08891), partial mRNA	sp|P50125|CYSD_EMENI/0.0/O-acetylhomoserine (thiol)-lyase OS=Emericella nidulans (strain FGSC A4 / ATCC 38163 / CBS 112.46 / NRRL 194 / M139) GN=cysD PE=2 SV=2	cmt:CCM_08891/0.0/O-acetylhomoserine-lyase; K17069 O-acetylhomoserine/O-acetylserine sulfhydrylase [EC:2.5.1.49 2.5.1.47]	SPBC428.11/6e-173/---	NA	biological_process:GO:0006520//cellular amino acid metabolic process;molecular_function:GO:0016765//transferase activity, transferring alkyl or aryl (other than methyl) groups;GO:0016829//lyase activity;GO:0030170//pyridoxal phosphate binding;
Unigene2295_All	Unigene2295_All	261.87	283.81	212.63	gi|573986259|ref|XP_006671050.1|/0/serine/threonine protein kinase, putative [Cordyceps militaris CM01] &gt;gi|346322086|gb|EGX91685.1| serine/threonine protein kinase, putative [Cordyceps militaris CM01]	gi|667655776|ref|XM_008601498.1|/0.0/Beauveria bassiana ARSEF 2860 kinase domain containing protein partial mRNA	sp|O14328|KSP1_SCHPO/1e-72/Serine/threonine-protein kinase ksp1 OS=Schizosaccharomyces pombe (strain 972 / ATCC 24843) GN=ksp1 PE=1 SV=1	ago:AGOS_ADR300C/1e-48/ADR300Cp; K08286 protein-serine/threonine kinase [EC:2.7.11.-]	SPy1625_1/3e-23/---	PS50011/44.372/Protein kinase domain profile.	biological_process:GO:0031929//TOR signaling;GO:0006468//protein phosphorylation;GO:0034613//cellular protein localization;GO:2000220//regulation of pseudohyphal growth;GO:0016242//negative regulation of macroautophagy;cellular_component:GO:0010494//cytoplasmic stress granule;GO:0005634//nucleus;GO:0005829//cytosol;molecular_function:GO:0005524//ATP binding;GO:0004674//protein serine/threonine ki…
Unigene6126_All	Unigene6126_All	261.09	274	234.89	gi|573988103|ref|XP_006671972.1|/0/dimethylaniline monooxygenase, putative [Cordyceps militaris CM01] &gt;gi|346320751|gb|EGX90351.1| dimethylaniline monooxygenase, putative [Cordyceps militaris CM01]	gi|573988100|ref|XM_006671908.1|/0.0/Cordyceps militaris CM01 adenylosuccinate synthetase (CCM_06768), partial mRNA	sp|B2AWF0|PURA_PODAN/7e-180/Adenylosuccinate synthetase OS=Podospora anserina (strain S / ATCC MYA-4624 / DSM 980 / FGSC 10383) GN=PODANS_7_6930 PE=3 SV=1	cmt:CCM_06768/0.0/adenylosuccinate synthetase; K01939 adenylosuccinate synthase [EC:6.3.4.4]	SPAC144.03/5e-143/---	PF13738/1.6E-27/Pyridine nucleotide-disulphide oxidoreductase	biological_process:GO:0044208//'de novo' AMP biosynthetic process;GO:0055114//oxidation-reduction process;cellular_component:GO:0005737//cytoplasm;molecular_function:GO:0000287//magnesium ion binding;GO:0005525//GTP binding;GO:0004497//monooxygenase activity;GO:0004019//adenylosuccinate synthase activity;
Unigene3784_All	Unigene3784_All	260.84	314.74	246.42	gi|573989369|ref|XP_006672605.1|/6.29274e-140/cytoplasmic ribosomal protein subunit S3 [Cordyceps militaris CM01] &gt;gi|346319548|gb|EGX89149.1| cytoplasmic ribosomal protein subunit S3 [Cordyceps militaris CM01]	gi|573989368|ref|XM_006672542.1|/0.0/Cordyceps militaris CM01 cytoplasmic ribosomal protein subunit S3 (CCM_07401), partial mRNA	sp|O60128|RS3_SCHPO/1e-94/40S ribosomal protein S3 OS=Schizosaccharomyces pombe (strain 972 / ATCC 24843) GN=rps3 PE=1 SV=1	cmt:CCM_07401/6e-141/cytoplasmic ribosomal protein subunit S3; K02985 small subunit ribosomal protein S3e	SPBC16G5.14c/3e-94/---	NA	biological_process:GO:0006412//translation;cellular_component:GO:0005829//cytosol;GO:0015935//small ribosomal subunit;molecular_function:GO:0003723//RNA binding;GO:0003735//structural constituent of ribosome;
Unigene4543_All	Unigene4543_All	260.27	239.42	28.92	gi|573979662|ref|XP_006667776.1|/6.62428e-169/hypothetical protein CCM_02561 [Cordyceps militaris CM01] &gt;gi|346324693|gb|EGX94290.1| hypothetical protein CCM_02561 [Cordyceps militaris CM01]	gi|667651350|ref|XM_008599285.1|/1e-83/Beauveria bassiana ARSEF 2860 tat pathway signal sequence partial mRNA	sp|O94317|YH5D_SCHPO/8e-08/Uncharacterized serine-rich protein C215.13 OS=Schizosaccharomyces pombe (strain 972 / ATCC 24843) GN=SPBC215.13 PE=1 SV=1	sce:YIR019C/3e-06/FLO11, MUC1, STA4; Flo11p; K19851 flocculation protein FLO11	NA	PF11807/4.9E-52/Domain of unknown function (DUF3328)	cellular_component:GO:0016021//integral component of membrane;
CL791.Contig1_All	CL791.Contig1_All	260.17	286.26	439.68	gi|573978406|ref|XP_006667148.1|/5.4865e-54/60S ribosomal protein L30-2 [Cordyceps militaris CM01] &gt;gi|346327675|gb|EGX97271.1| 60S ribosomal protein L30-2 [Cordyceps militaris CM01]	gi|573978405|ref|XM_006667085.1|/0.0/Cordyceps militaris CM01 60S ribosomal protein L30-2 (CCM_01931), partial mRNA	sp|Q7S7F1|RL30_NEUCR/2e-38/60S ribosomal protein L30 OS=Neurospora crassa (strain ATCC 24698 / 74-OR23-1A / CBS 708.71 / DSM 1257 / FGSC 987) GN=rpl-30 PE=3 SV=1	cmt:CCM_01931/5e-55/60S ribosomal protein L30-2; K02908 large subunit ribosomal protein L30e	SPAC1250.05/7e-37/---	NA	biological_process:GO:0006412//translation;cellular_component:GO:0005840//ribosome;molecular_function:GO:0003735//structural constituent of ribosome;
Unigene4144_All	Unigene4144_All	259.19	198.69	113.14	gi|573984967|ref|XP_006670404.1|/1.86571e-170/mitochondrial carrier protein YHM1/SHM1, putative [Cordyceps militaris CM01] &gt;gi|346321440|gb|EGX91039.1| mitochondrial carrier protein YHM1/SHM1, putative [Cordyceps militaris CM01]	gi|630026465|ref|XM_007837621.1|/1e-103/Pestalotiopsis fici W106-1 Mitochondrial GTP/GDP carrier protein 1 mRNA	sp|P38988|GGC1_YEAST/1e-121/Mitochondrial GTP/GDP carrier protein 1 OS=Saccharomyces cerevisiae (strain ATCC 204508 / S288c) GN=GGC1 PE=1 SV=1	cgi:CGB_E3360W/5e-17/succinate:fumarate antiporter; K15100 solute carrier family 25 (mitochondrial citrate transporter), member 1	NA	PS50920/7.667/Solute carrier (Solcar) repeat profile.	biological_process:GO:0006879//cellular iron ion homeostasis;GO:0000002//mitochondrial genome maintenance;GO:1903790//guanine nucleotide transmembrane transport;cellular_component:GO:0005623//cell;GO:0016021//integral component of membrane;molecular_function:GO:0001409//guanine nucleotide transmembrane transporter activity;
CL338.Contig2_All	CL338.Contig2_All	257.18	100.99	96.16	gi|573976370|ref|XP_006666130.1|/0/period circadian protein, putative [Cordyceps militaris CM01] &gt;gi|346326657|gb|EGX96253.1| period circadian protein, putative [Cordyceps militaris CM01]	gi|28950049|emb|BX294013.1|/3e-18/Neurospora crassa DNA linkage group V Cosmid contig X4G11	sp|Q8TFG4|YL54_SCHPO/3e-20/Uncharacterized protein PB18E9.04c OS=Schizosaccharomyces pombe (strain 972 / ATCC 24843) GN=SPAPB18E9.04c PE=4 SV=1	dha:DEHA2F13860g/9e-17/DEHA2F13860p; K14297 nuclear pore complex protein Nup98-Nup96	RSc1775/3e-14/---	NA	NA
Unigene1504_All	Unigene1504_All	256.57	309.24	261.11	gi|302908920|ref|XP_003049958.1|/0/hypothetical protein NECHADRAFT_71647 [Nectria haematococca mpVI 77-13-4] &gt;gi|256730895|gb|EEU44245.1| hypothetical protein NECHADRAFT_71647 [Nectria haematococca mpVI 77-13-4]	gi|573979339|ref|XM_006667552.1|/0.0/Cordyceps militaris CM01 argininosuccinate synthase (CCM_02400), partial mRNA	sp|P22768|ASSY_YEAST/2e-123/Argininosuccinate synthase OS=Saccharomyces cerevisiae (strain ATCC 204508 / S288c) GN=ARG1 PE=1 SV=3	cmt:CCM_02400/0.0/argininosuccinate synthase; K01940 argininosuccinate synthase [EC:6.3.4.5]	YOL058w/2e-121/---	PTHR11587/2.3E-239/--	biological_process:GO:0006526//arginine biosynthetic process;molecular_function:GO:0005524//ATP binding;GO:0004055//argininosuccinate synthase activity;
Unigene558_All	Unigene558_All	256.37	303.49	343.58	gi|573983067|ref|XP_006669454.1|/3.47363e-124/hypothetical protein CCM_04243 [Cordyceps militaris CM01] &gt;gi|346323273|gb|EGX92871.1| hypothetical protein CCM_04243 [Cordyceps militaris CM01]	gi|667645642|ref|XM_008596431.1|/8e-99/Beauveria bassiana ARSEF 2860 large conductance mechanosensitive channel protein partial mRNA	sp|P38739|WSC4_YEAST/2e-10/Cell wall integrity and stress response component 4 OS=Saccharomyces cerevisiae (strain ATCC 204508 / S288c) GN=WSC4 PE=1 SV=1	maj:MAA_05083/7e-64/Large-conductance mechanosensitive channel; K03282 large conductance mechanosensitive channel	VCA0612/2e-08/---	NA	biological_process:GO:0034220//ion transmembrane transport;cellular_component:GO:0016021//integral component of membrane;molecular_function:GO:0005216//ion channel activity;
Unigene7302_All	Unigene7302_All	253.61	229.36	284.84	gi|573976458|ref|XP_006666174.1|/5.84482e-69/hypothetical protein CCM_00953 [Cordyceps militaris CM01] &gt;gi|346326701|gb|EGX96297.1| hypothetical protein CCM_00953 [Cordyceps militaris CM01]	gi|768311755|gb|CP010983.1|/4e-11/Verticillium dahliae VdLs.17 chromosome 4, complete sequence	sp|P47179|DAN4_YEAST/8e-09/Cell wall protein DAN4 OS=Saccharomyces cerevisiae (strain ATCC 204508 / S288c) GN=DAN4 PE=2 SV=1	ttt:THITE_2111816/2e-09/glycoside hydrolase family 18 protein; K01183 chitinase [EC:3.2.1.14]	Rv0312/2e-07/---	NA	cellular_component:GO:0005739//mitochondrion;
Unigene4754_All	Unigene4754_All	252.65	256.75	289.77	gi|573987311|ref|XP_006671576.1|/6.90133e-113/hypothetical protein CCM_06373 [Cordyceps militaris CM01] &gt;gi|346322613|gb|EGX92212.1| hypothetical protein CCM_06373 [Cordyceps militaris CM01]	gi|573987310|ref|XM_006671513.1|/0.0/Cordyceps militaris CM01 hypothetical protein (CCM_06373), partial mRNA	NA	NA	NA	NA	NA
CL1223.Contig2_All	CL1223.Contig2_All	252.26	287.64	307.91	gi|573982407|ref|XP_006669124.1|/1.61828e-115/peptidyl-prolyl cis-trans isomerase B precursor [Cordyceps militaris CM01] &gt;gi|346322942|gb|EGX92540.1| peptidyl-prolyl cis-trans isomerase B precursor [Cordyceps militaris CM01]	gi|573982406|ref|XM_006669061.1|/0.0/Cordyceps militaris CM01 peptidyl-prolyl cis-trans isomerase B precursor (CCM_03913), partial mRNA	sp|Q4I5R9|PPIB_GIBZE/4e-91/Peptidyl-prolyl cis-trans isomerase B OS=Gibberella zeae (strain PH-1 / ATCC MYA-4620 / FGSC 9075 / NRRL 31084) GN=CPR2 PE=3 SV=2	cmt:CCM_03913/2e-116/peptidyl-prolyl cis-trans isomerase B precursor; K03768 peptidyl-prolyl cis-trans isomerase B (cyclophilin B) [EC:5.2.1.8]	YDR155c/4e-58/---	PTHR11071:SF11/3.3E-122/--	biological_process:GO:0006457//protein folding;GO:0000413//protein peptidyl-prolyl isomerization;molecular_function:GO:0003755//peptidyl-prolyl cis-trans isomerase activity;
Unigene4813_All	Unigene4813_All	251.12	287.65	186.25	gi|573987151|ref|XP_006671496.1|/0/calnexin precursor [Cordyceps militaris CM01] &gt;gi|346322533|gb|EGX92132.1| calnexin precursor [Cordyceps militaris CM01]	gi|573987150|ref|XM_006671433.1|/0.0/Cordyceps militaris CM01 calnexin precursor (CCM_06292), partial mRNA	sp|Q6Q487|CALX_ASPFU/0.0/Calnexin homolog OS=Neosartorya fumigata (strain ATCC MYA-4609 / Af293 / CBS 101355 / FGSC A1100) GN=AFUA_4G12850 PE=2 SV=2	cmt:CCM_06292/0.0/calnexin precursor; K08054 calnexin	XF1267/9e-08/---	PS00805/-/Calreticulin family repeated motif signature.	biological_process:GO:0006457//protein folding;cellular_component:GO:0005783//endoplasmic reticulum;GO:0016021//integral component of membrane;molecular_function:GO:0005509//calcium ion binding;GO:0051082//unfolded protein binding;
Unigene5437_All	Unigene5437_All	250.89	253.2	241.93	gi|573980168|ref|XP_006668029.1|/6.1412e-170/telomere and ribosome associated protein Stm1, putative [Cordyceps militaris CM01] &gt;gi|346324946|gb|EGX94543.1| telomere and ribosome associated protein Stm1, putative [Cordyceps militaris CM01]	gi|667644776|ref|XM_008595998.1|/0.0/Beauveria bassiana ARSEF 2860 elicitor protein partial mRNA	sp|P39015|STM1_YEAST/3e-22/Suppressor protein STM1 OS=Saccharomyces cerevisiae (strain ATCC 204508 / S288c) GN=STM1 PE=1 SV=3	maw:MAC_08265/1e-100/elicitor protein; K13199 plasminogen activator inhibitor 1 RNA-binding protein	Cgl1130/1e-09/---	PF09598/2.7E-6/Stm1	NA
Unigene8254_All	Unigene8254_All	250.76	258.09	224.72	gi|701770009|gb|KGQ05025.1|/1.32832e-110/Proteasome component PUP3 [Beauveria bassiana D1-5]	gi|573988492|ref|XM_006672104.1|/0.0/Cordyceps militaris CM01 proteasome component PUP3 (CCM_06966), partial mRNA	sp|P25451|PSB3_YEAST/6e-86/Proteasome subunit beta type-3 OS=Saccharomyces cerevisiae (strain ATCC 204508 / S288c) GN=PUP3 PE=1 SV=1	cmt:CCM_06966/3e-107/proteasome component PUP3; K02735 20S proteasome subunit beta 3 [EC:3.4.25.1]	YER094c/1e-85/---	PS00854/-/Proteasome beta-type subunits signature.	biological_process:GO:0043161//proteasome-mediated ubiquitin-dependent protein catabolic process;GO:0010499//proteasomal ubiquitin-independent protein catabolic process;GO:0010950//positive regulation of endopeptidase activity;cellular_component:GO:0005634//nucleus;GO:0019774//proteasome core complex, beta-subunit complex;GO:0005737//cytoplasm;molecular_function:GO:0061133//endopeptidase activato…
Unigene6070_All	Unigene6070_All	250.63	256.94	322.39	gi|573979872|ref|XP_006667881.1|/8.28741e-44/hypothetical protein CCM_02666 [Cordyceps militaris CM01] &gt;gi|346324798|gb|EGX94395.1| hypothetical protein CCM_02666 [Cordyceps militaris CM01]	gi|573979871|ref|XM_006667818.1|/1e-140/Cordyceps militaris CM01 hypothetical protein (CCM_02666), partial mRNA	NA	NA	NA	NA	NA
Unigene8435_All	Unigene8435_All	249.8	306.94	267.7	gi|667661331|ref|XP_008602497.1|/1.54565e-109/60S ribosomal protein L16 [Beauveria bassiana ARSEF 2860] &gt;gi|400593955|gb|EJP61841.1| 60S ribosomal protein L16 [Beauveria bassiana ARSEF 2860]	gi|667661330|ref|XM_008604275.1|/0.0/Beauveria bassiana ARSEF 2860 60S ribosomal protein L16 partial mRNA	sp|Q9P720|RL16_NEUCR/6e-99/60S ribosomal protein L16 OS=Neurospora crassa (strain ATCC 24698 / 74-OR23-1A / CBS 708.71 / DSM 1257 / FGSC 987) GN=crp-46 PE=3 SV=1	cmt:CCM_09070/2e-103/60S ribosomal protein L16; K02872 large subunit ribosomal protein L13Ae	YIL133c/9e-81/---	NA	biological_process:GO:0006412//translation;cellular_component:GO:0015934//large ribosomal subunit;molecular_function:GO:0003735//structural constituent of ribosome;
Unigene645_All	Unigene645_All	249.76	285.73	144.1	gi|573987001|ref|XP_006671421.1|/5.00651e-176/HSP20-like chaperone [Cordyceps militaris CM01] &gt;gi|346322458|gb|EGX92057.1| HSP20-like chaperone [Cordyceps militaris CM01]	gi|573987000|ref|XM_006671358.1|/0.0/Cordyceps militaris CM01 HSP20-like chaperone (CCM_06217), partial mRNA	sp|P08640|MUC1_YEAST/7e-14/Flocculation protein FLO11 OS=Saccharomyces cerevisiae (strain ATCC 204508 / S288c) GN=MUC1 PE=1 SV=2	cmt:CCM_06217/5e-177/HSP20-like chaperone; K13993 HSP20 family protein	SPBC3E7.02c/4e-10/---	NA	NA
Unigene2152_All	Unigene2152_All	248.91	161.5	179.89	gi|573991475|ref|XP_006673658.1|/2.12763e-83/cyanate hydratase, putative [Cordyceps militaris CM01] &gt;gi|346318811|gb|EGX88413.1| cyanate hydratase, putative [Cordyceps militaris CM01]	gi|346995772|gb|CP003009.1|/3e-50/Thielavia terrestris NRRL 8126 chromosome 1, complete sequence	sp|D1ZHN6|CYNS_SORMK/2e-66/Cyanate hydratase OS=Sordaria macrospora (strain ATCC MYA-333 / DSM 997 / K(L3346) / K-hell) GN=CYN1 PE=1 SV=2	ncr:NCU01258/3e-63/cyanase; K01725 cyanate lyase [EC:4.2.1.104]	all1291/2e-30/---	NA	biological_process:GO:0009439//cyanate metabolic process;molecular_function:GO:0003677//DNA binding;GO:0008824//cyanate hydratase activity;
CL636.Contig2_All	CL636.Contig2_All	248.84	214.15	139.2	gi|682333308|gb|KFY31404.1|/2.18875e-17/hypothetical protein V493_01138 [Pseudogymnoascus sp. VKM F-4281 (FW-2241)]	NA	NA	NA	NA	NA	NA
Unigene3623_All	Unigene3623_All	248.82	290.82	234.44	gi|573988455|ref|XP_006672148.1|/0/cell wall glucanase (Scw11), putative [Cordyceps militaris CM01] &gt;gi|346320927|gb|EGX90527.1| cell wall glucanase (Scw11), putative [Cordyceps militaris CM01]	gi|667659008|ref|XM_008603114.1|/0.0/Beauveria bassiana ARSEF 2860 beta-glucosidase partial mRNA	sp|A1DBG6|BTGE_NEOFI/5e-126/Probable beta-glucosidase btgE OS=Neosartorya fischeri (strain ATCC 1020 / DSM 3700 / FGSC A1164 / NRRL 181) GN=btgE PE=3 SV=1	lth:KLTH0G17886g/2e-35/KLTH0G17886p; K19475 WAS/WASL-interacting protein	YGL028c/2e-45/---	PTHR16631:SF8/4.4E-75/--	biological_process:GO:0005975//carbohydrate metabolic process;cellular_component:GO:0009277//fungal-type cell wall;
Unigene317_All	Unigene317_All	248.74	159.99	251.49	gi|573985235|ref|XP_006670538.1|/0/Intradiol ring-cleavage dioxygenase, core [Cordyceps militaris CM01] &gt;gi|346321574|gb|EGX91173.1| Intradiol ring-cleavage dioxygenase, core [Cordyceps militaris CM01]	gi|573985234|ref|XM_006670475.1|/0.0/Cordyceps militaris CM01 Intradiol ring-cleavage dioxygenase, core (CCM_05331), partial mRNA	sp|P86029|HQD2_CANAL/5e-55/Catechol 1,2-dioxygenase OS=Candida albicans (strain SC5314 / ATCC MYA-2876) GN=HQD2 PE=1 SV=1	cmt:CCM_05331/0.0/Intradiol ring-cleavage dioxygenase, core; K03381 catechol 1,2-dioxygenase [EC:1.13.11.1]	AGc4592/7e-42/---	PF00775/2.8E-40/Dioxygenase	biological_process:GO:0009712//catechol-containing compound metabolic process;GO:0055114//oxidation-reduction process;molecular_function:GO:0018576//catechol 1,2-dioxygenase activity;GO:0008199//ferric iron binding;
Unigene2873_All	Unigene2873_All	248.66	224.31	196.46	gi|573975644|ref|XP_006665767.1|/4.14804e-142/proteasome subunit alpha type 6 [Cordyceps militaris CM01] &gt;gi|346326294|gb|EGX95890.1| proteasome subunit alpha type 6 [Cordyceps militaris CM01]	gi|573975643|ref|XM_006665704.1|/0.0/Cordyceps militaris CM01 proteasome subunit alpha type 6 (CCM_00544), partial mRNA	sp|P21243|PSA1_YEAST/1e-77/Proteasome subunit alpha type-1 OS=Saccharomyces cerevisiae (strain ATCC 204508 / S288c) GN=SCL1 PE=1 SV=1	cmt:CCM_00544/4e-143/proteasome subunit alpha type 6; K02730 20S proteasome subunit alpha 1 [EC:3.4.25.1]	YGL011c/2e-77/---	PF00227/8.6E-47/Proteasome subunit	biological_process:GO:0043161//proteasome-mediated ubiquitin-dependent protein catabolic process;GO:0010499//proteasomal ubiquitin-independent protein catabolic process;cellular_component:GO:0005634//nucleus;GO:0019773//proteasome core complex, alpha-subunit complex;GO:0005829//cytosol;molecular_function:GO:0004298//threonine-type endopeptidase activity;
Unigene7367_All	Unigene7367_All	248.01	253.22	263.83	gi|667649971|ref|XP_008596817.1|/3.45454e-51/mitochondrial F1F0 ATP synthase subunit F Atp17 [Beauveria bassiana ARSEF 2860] &gt;gi|400600027|gb|EJP67718.1| mitochondrial F1F0 ATP synthase subunit F Atp17 [Beauveria bassiana ARSEF 2860]	gi|667649970|ref|XM_008598595.1|/1e-128/Beauveria bassiana ARSEF 2860 mitochondrial F1F0 ATP synthase subunit F Atp17 partial mRNA	sp|Q06405|ATPK_YEAST/1e-22/ATP synthase subunit f, mitochondrial OS=Saccharomyces cerevisiae (strain ATCC 204508 / S288c) GN=ATP17 PE=1 SV=1	cmt:CCM_00416/6e-48/mitochondrial F1F0 ATP synthase subunit F Atp17; K02139 F-type H+-transporting ATPase subunit f	NA	NA	biological_process:GO:0015986//ATP synthesis coupled proton transport;cellular_component:GO:0000276//mitochondrial proton-transporting ATP synthase complex, coupling factor F(o);GO:0016021//integral component of membrane;molecular_function:GO:0046933//proton-transporting ATP synthase activity, rotational mechanism;GO:0046961//proton-transporting ATPase activity, rotational mechanism;
Unigene3500_All	Unigene3500_All	247.81	276.69	245.32	gi|573986143|ref|XP_006670992.1|/1.2882e-81/60S ribosomal protein L28 [Cordyceps militaris CM01] &gt;gi|346322028|gb|EGX91627.1| 60S ribosomal protein L28 [Cordyceps militaris CM01]	gi|573986142|ref|XM_006670929.1|/0.0/Cordyceps militaris CM01 60S ribosomal protein L28 (CCM_05785), partial mRNA	sp|O14069|RL28E_SCHPO/3e-26/Probable 60S ribosomal protein L28e OS=Schizosaccharomyces pombe (strain 972 / ATCC 24843) GN=rpl28e PE=1 SV=1	cmt:CCM_05785/1e-82/60S ribosomal protein L28; K02903 large subunit ribosomal protein L28e	NA	NA	biological_process:GO:0006412//translation;cellular_component:GO:0005840//ribosome;GO:0005829//cytosol;molecular_function:GO:0003735//structural constituent of ribosome;
Unigene1977_All	Unigene1977_All	247.5	292.03	224.6	gi|573991411|ref|XP_006673626.1|/1.51774e-167/60S ribosomal protein L5 (CPR4) [Cordyceps militaris CM01] &gt;gi|346318779|gb|EGX88381.1| 60S ribosomal protein L5 (CPR4) [Cordyceps militaris CM01]	gi|573991410|ref|XM_006673563.1|/0.0/Cordyceps militaris CM01 60S ribosomal protein L5 (CPR4) (CCM_08424), partial mRNA	sp|O59953|RL5_NEUCR/5e-142/60S ribosomal protein L5 OS=Neurospora crassa (strain ATCC 24698 / 74-OR23-1A / CBS 708.71 / DSM 1257 / FGSC 987) GN=rpl-5 PE=3 SV=1	cmt:CCM_08424/1e-168/60S ribosomal protein L5 (CPR4); K02932 large subunit ribosomal protein L5e	YPL131w/5e-107/---	NA	biological_process:GO:0002181//cytoplasmic translation;GO:0000027//ribosomal large subunit assembly;cellular_component:GO:0022625//cytosolic large ribosomal subunit;molecular_function:GO:0008097//5S rRNA binding;GO:0003735//structural constituent of ribosome;
Unigene7311_All	Unigene7311_All	247.48	245.36	460.35	gi|573975492|ref|XP_006665691.1|/5.05748e-53/hypothetical protein CCM_00468 [Cordyceps militaris CM01] &gt;gi|346326218|gb|EGX95814.1| hypothetical protein CCM_00468 [Cordyceps militaris CM01]	gi|573975491|ref|XM_006665628.1|/1e-174/Cordyceps militaris CM01 hypothetical protein (CCM_00468), partial mRNA	sp|P47179|DAN4_YEAST/3e-07/Cell wall protein DAN4 OS=Saccharomyces cerevisiae (strain ATCC 204508 / S288c) GN=DAN4 PE=2 SV=1	NA	NA	NA	NA
Unigene1525_All	Unigene1525_All	247.01	245.93	431.17	gi|573983111|ref|XP_006669476.1|/0/C-4 methylsterol oxidase, variant [Cordyceps militaris CM01] &gt;gi|346323295|gb|EGX92893.1| C-4 methylsterol oxidase, variant [Cordyceps militaris CM01]	gi|573983110|ref|XM_006669413.1|/0.0/Cordyceps militaris CM01 C-4 methylsterol oxidase, variant (CCM_04265), partial mRNA	sp|P53045|MSMO_YEAST/3e-99/Methylsterol monooxygenase OS=Saccharomyces cerevisiae (strain ATCC 204508 / S288c) GN=ERG25 PE=1 SV=1	cmt:CCM_04265/0.0/C-4 methylsterol oxidase, variant; K07750 methylsterol monooxygenase [EC:1.14.13.72]	YGR060w/8e-99/---	PTHR11863:SF22/5.2E-85/--	biological_process:GO:0006696//ergosterol biosynthetic process;GO:0055114//oxidation-reduction process;GO:0006633//fatty acid biosynthetic process;cellular_component:GO:0016021//integral component of membrane;GO:0005789//endoplasmic reticulum membrane;GO:0005886//plasma membrane;molecular_function:GO:0000254//C-4 methylsterol oxidase activity;GO:0005506//iron ion binding;
Unigene1540_All	Unigene1540_All	246.88	269.17	301.37	gi|573976960|ref|XP_006666425.1|/0/dihydrolipoamide succinyltransferase, putative [Cordyceps militaris CM01] &gt;gi|346326952|gb|EGX96548.1| dihydrolipoamide succinyltransferase, putative [Cordyceps militaris CM01]	gi|667662860|ref|XM_008605040.1|/0.0/Beauveria bassiana ARSEF 2860 2-oxoacid dehydrogenase acyltransferase partial mRNA	sp|P19262|ODO2_YEAST/2e-124/Dihydrolipoyllysine-residue succinyltransferase component of 2-oxoglutarate dehydrogenase complex, mitochondrial OS=Saccharomyces cerevisiae (strain ATCC 204508 / S288c) GN=KGD2 PE=1 SV=2	maj:MAA_04470/1e-179/Dihydrolipoamide succinyltransferase; K00658 2-oxoglutarate dehydrogenase E2 component (dihydrolipoamide succinyltransferase) [EC:2.3.1.61]	YDR148c/6e-124/---	PTHR23151/8.9E-206/--	biological_process:GO:0006099//tricarboxylic acid cycle;cellular_component:GO:0045252//oxoglutarate dehydrogenase complex;molecular_function:GO:0004149//dihydrolipoyllysine-residue succinyltransferase activity;
Unigene85_All	Unigene85_All	246.82	254.37	351.84	gi|573983983|ref|XP_006669912.1|/1.30433e-77/hypothetical protein CCM_04702 [Cordyceps militaris CM01] &gt;gi|346323731|gb|EGX93329.1| hypothetical protein CCM_04702 [Cordyceps militaris CM01]	gi|573983982|ref|XM_006669849.1|/0.0/Cordyceps militaris CM01 hypothetical protein (CCM_04702), partial mRNA	sp|P38216|YBM6_YEAST/6e-15/Uncharacterized protein YBR016W OS=Saccharomyces cerevisiae (strain ATCC 204508 / S288c) GN=YBR016W PE=1 SV=1	mgr:MGG_06847/3e-13/annexin A7; K17095 annexin A7/11	NA	NA	NA
Unigene5003_All	Unigene5003_All	246.2	293.55	289.26	gi|573982199|ref|XP_006669020.1|/9.26332e-161/WSC domain-containing protein [Cordyceps militaris CM01] &gt;gi|346322838|gb|EGX92436.1| WSC domain-containing protein [Cordyceps militaris CM01]	gi|573982198|ref|XM_006668957.1|/0.0/Cordyceps militaris CM01 WSC domain-containing protein (CCM_03809), partial mRNA	sp|P87179|WSC1_SCHPO/2e-12/Cell wall integrity and stress response component 1 OS=Schizosaccharomyces pombe (strain 972 / ATCC 24843) GN=wsc1 PE=1 SV=3	cmt:CCM_03809/8e-162/WSC domain-containing protein; K11244 cell wall integrity and stress response component	NA	PS51212/8.802/WSC domain profile.	cellular_component:GO:0016021//integral component of membrane;GO:0005886//plasma membrane;
CL1724.Contig2_All	CL1724.Contig2_All	243.98	314.97	208.2	gi|573983527|ref|XP_006669684.1|/6.03683e-145/60S ribosomal protein L8 [Cordyceps militaris CM01] &gt;gi|346323503|gb|EGX93101.1| 60S ribosomal protein L8 [Cordyceps militaris CM01]	gi|573983526|ref|XM_006669621.1|/0.0/Cordyceps militaris CM01 60S ribosomal protein L8 (CCM_04473), partial mRNA	sp|P29453|RL8B_YEAST/5e-99/60S ribosomal protein L8-B OS=Saccharomyces cerevisiae (strain ATCC 204508 / S288c) GN=RPL8B PE=1 SV=3	cmt:CCM_04473/6e-146/60S ribosomal protein L8; K02936 large subunit ribosomal protein L7Ae	YLL045c/1e-98/---	PF01248/8.5E-21/Ribosomal protein L7Ae/L30e/S12e/Gadd45 family	biological_process:GO:0042254//ribosome biogenesis;cellular_component:GO:0005840//ribosome;
Unigene1215_All	Unigene1215_All	243.81	213.82	360.97	gi|573988203|ref|XP_006672022.1|/4.79154e-138/30 kDa heat shock protein [Cordyceps militaris CM01] &gt;gi|346320801|gb|EGX90401.1| 30 kDa heat shock protein [Cordyceps militaris CM01]	gi|573988202|ref|XM_006671959.1|/0.0/Cordyceps militaris CM01 30 kDa heat shock protein (CCM_06821), partial mRNA	sp|P19752|HSP30_NEUCR/2e-50/30 kDa heat shock protein OS=Neurospora crassa (strain ATCC 24698 / 74-OR23-1A / CBS 708.71 / DSM 1257 / FGSC 987) GN=hsp30 PE=3 SV=1	sce:YIR019C/4e-18/FLO11, MUC1, STA4; Flo11p; K19851 flocculation protein FLO11	DR0479/6e-09/---	PF00011/4.5E-10/Hsp20/alpha crystallin family	NA
Unigene2968_All	Unigene2968_All	243.24	98.25	11.13	gi|573979256|ref|XP_006667573.1|/2.43393e-57/sucrose transporter [Cordyceps militaris CM01] &gt;gi|346324490|gb|EGX94087.1| sucrose transporter [Cordyceps militaris CM01]	gi|573979255|ref|XM_006667510.1|/0.0/Cordyceps militaris CM01 sucrose transporter (CCM_02358), partial mRNA	NA	cmt:CCM_02358/3e-58/sucrose transporter; K15378 solute carrier family 45, member 1/2/4	NA	NA	cellular_component:GO:0016021//integral component of membrane;
Unigene7533_All	Unigene7533_All	243.02	136.66	107.6	gi|573981621|ref|XP_006668731.1|/2.64181e-86/scytalone dehydratase [Cordyceps militaris CM01] &gt;gi|346325648|gb|EGX95245.1| scytalone dehydratase [Cordyceps militaris CM01]	gi|573981620|ref|XM_006668668.1|/0.0/Cordyceps militaris CM01 scytalone dehydratase (CCM_03517), partial mRNA	sp|Q00455|SCYD_COLOR/2e-31/Scytalone dehydratase OS=Colletotrichum orbiculare (strain 104-T / ATCC 96160 / CBS 514.97 / LARS 414 / MAFF 240422) GN=SCD1 PE=3 SV=1	cmt:CCM_03517/2e-87/scytalone dehydratase; K17740 scytalone dehydratase [EC:4.2.1.94]	DRA0212/3e-08/---	NA	biological_process:GO:0006582//melanin metabolic process;molecular_function:GO:0030411//scytalone dehydratase activity;
Unigene5880_All	Unigene5880_All	243.01	252.54	215.28	gi|573982625|ref|XP_006669233.1|/0/DNA-binding protein creA [Cordyceps militaris CM01] &gt;gi|346323051|gb|EGX92649.1| DNA-binding protein creA [Cordyceps militaris CM01]	gi|573982624|ref|XM_006669170.1|/0.0/Cordyceps militaris CM01 DNA-binding protein creA (CCM_04022), partial mRNA	sp|O94131|CREA_GIBFU/2e-167/DNA-binding protein creA OS=Gibberella fujikuroi GN=CREA PE=3 SV=1	cmt:CCM_04022/0.0/DNA-binding protein creA; K09467 zinc-finger protein CreA/MIG	ECU08g0560/8e-14/---	PS00028/-/Zinc finger C2H2 type domain signature.	molecular_function:GO:0003677//DNA binding;GO:0046872//metal ion binding;
Unigene6069_All	Unigene6069_All	241.99	238.57	272.26	gi|573979872|ref|XP_006667881.1|/5.71949e-155/hypothetical protein CCM_02666 [Cordyceps militaris CM01] &gt;gi|346324798|gb|EGX94395.1| hypothetical protein CCM_02666 [Cordyceps militaris CM01]	gi|768311755|gb|CP010983.1|/3e-45/Verticillium dahliae VdLs.17 chromosome 4, complete sequence	sp|P08640|MUC1_YEAST/1e-12/Flocculation protein FLO11 OS=Saccharomyces cerevisiae (strain ATCC 204508 / S288c) GN=MUC1 PE=1 SV=2	sce:YIR019C/2e-11/FLO11, MUC1, STA4; Flo11p; K19851 flocculation protein FLO11	SPBC28F2.12/2e-10/---	NA	NA
CL1107.Contig4_All	CL1107.Contig4_All	241.54	228.21	214.84	gi|573991405|ref|XP_006673623.1|/0/phosphatidylserine decarboxylase Psd2, putative [Cordyceps militaris CM01] &gt;gi|346318776|gb|EGX88378.1| phosphatidylserine decarboxylase Psd2, putative [Cordyceps militaris CM01]	gi|667655260|ref|XM_008601240.1|/0.0/Beauveria bassiana ARSEF 2860 phosphatidylserine decarboxylase partial mRNA	sp|O14111|PSD3_SCHPO/5e-174/Phosphatidylserine decarboxylase proenzyme 3 OS=Schizosaccharomyces pombe (strain 972 / ATCC 24843) GN=psd3 PE=3 SV=2	maj:MAA_00036/0.0/Phosphatidylserine decarboxylase; K01613 phosphatidylserine decarboxylase [EC:4.1.1.65]	SPAC31G5.15_2/8e-94/---	PF02666/1.4E-51/Phosphatidylserine decarboxylase	biological_process:GO:0006646//phosphatidylethanolamine biosynthetic process;GO:0016540//protein autoprocessing;cellular_component:GO:0010008//endosome membrane;GO:0005795//Golgi stack;GO:0000139//Golgi membrane;molecular_function:GO:0005509//calcium ion binding;GO:0004609//phosphatidylserine decarboxylase activity;
Unigene2140_All	Unigene2140_All	240.67	182.12	147.79	gi|573985153|ref|XP_006670497.1|/1.70839e-68/L-PSP endoribonuclease family protein Brt1 [Cordyceps militaris CM01] &gt;gi|346321533|gb|EGX91132.1| L-PSP endoribonuclease family protein Brt1 [Cordyceps militaris CM01]	gi|573985152|ref|XM_006670434.1|/0.0/Cordyceps militaris CM01 L-PSP endoribonuclease family protein Brt1 (CCM_05290), partial mRNA	sp|O43003|MMF1_SCHPO/9e-25/Protein mmf1, mitochondrial OS=Schizosaccharomyces pombe (strain 972 / ATCC 24843) GN=mmf1 PE=3 SV=1	mrr:Moror_7461/7e-08/meiotically up-regulated 71 protein; K06927 diphthine-ammonia ligase [EC:6.3.1.14]	PH0854/1e-32/---	PTHR11803:SF5/9.6E-57/--	NA
Unigene5899_All	Unigene5899_All	240.55	248.28	289.95	gi|573983921|ref|XP_006669881.1|/0/cross-pathway control protein 1 [Cordyceps militaris CM01] &gt;gi|346323700|gb|EGX93298.1| cross-pathway control protein 1 [Cordyceps militaris CM01]	gi|573983920|ref|XM_006669818.1|/0.0/Cordyceps militaris CM01 cross-pathway control protein 1 (CCM_04671), partial mRNA	sp|P11115|CPC1_NEUCR/6e-56/Cross-pathway control protein 1 OS=Neurospora crassa (strain ATCC 24698 / 74-OR23-1A / CBS 708.71 / DSM 1257 / FGSC 987) GN=cpc-1 PE=1 SV=2	yli:YALI0E27742g/1e-10/YALI0E27742p; K09464 general control protein GCN4	NA	PS50217/8.657/Basic-leucine zipper (bZIP) domain profile.	biological_process:GO:0006355//regulation of transcription, DNA-templated;molecular_function:GO:0043565//sequence-specific DNA binding;GO:0003700//transcription factor activity, sequence-specific DNA binding;
Unigene5550_All	Unigene5550_All	240.31	225.67	367.35	NA	NA	NA	NA	NA	NA	NA
Unigene8247_All	Unigene8247_All	239.64	261.57	266.04	gi|573982939|ref|XP_006669390.1|/1.60411e-64/vacuolar ATP synthase subunit F [Cordyceps militaris CM01] &gt;gi|346323208|gb|EGX92806.1| vacuolar ATP synthase subunit F [Cordyceps militaris CM01]	gi|573982938|ref|XM_006669327.1|/0.0/Cordyceps militaris CM01 vacuolar ATP synthase subunit F (CCM_04179), partial mRNA	sp|Q9Y756|VATF_NEUCR/1e-56/V-type proton ATPase subunit F OS=Neurospora crassa (strain ATCC 24698 / 74-OR23-1A / CBS 708.71 / DSM 1257 / FGSC 987) GN=vma-7 PE=3 SV=1	cmt:CCM_04179/2e-65/vacuolar ATP synthase subunit F; K02151 V-type H+-transporting ATPase subunit F	YGR020c/1e-34/---	PF01990/9.9E-32/ATP synthase (F/14-kDa) subunit	biological_process:GO:0015991//ATP hydrolysis coupled proton transport;cellular_component:GO:0033180//proton-transporting V-type ATPase, V1 domain;molecular_function:GO:0046961//proton-transporting ATPase activity, rotational mechanism;
Unigene4757_All	Unigene4757_All	239.63	244.59	250.92	gi|701777141|gb|KGQ10894.1|/4.26253e-51/Protein transport protein Sec61 subunit beta [Beauveria bassiana D1-5]	gi|573976539|ref|XM_006666152.1|/1e-168/Cordyceps militaris CM01 Preprotein translocase Sec, Sec61-beta subunit, eukarya (CCM_00994), partial mRNA	sp|Q9HFC7|SC61B_YARLI/4e-25/Protein transport protein Sec61 subunit beta OS=Yarrowia lipolytica (strain CLIB 122 / E 150) GN=SBH1 PE=3 SV=1	cmt:CCM_00994/1e-47/Preprotein translocase Sec, Sec61-beta subunit, eukarya; K09481 protein transport protein SEC61 subunit beta	NA	NA	biological_process:GO:0006886//intracellular protein transport;GO:0016311//dephosphorylation;cellular_component:GO:0005784//Sec61 translocon complex;GO:0016021//integral component of membrane;molecular_function:GO:0016791//phosphatase activity;
Unigene6760_All	Unigene6760_All	238.56	272.11	279.83	gi|573987895|ref|XP_006671868.1|/0/SUN domain-containing protein [Cordyceps militaris CM01] &gt;gi|346320645|gb|EGX90245.1| SUN domain-containing protein [Cordyceps militaris CM01]	gi|573987894|ref|XM_006671805.1|/0.0/Cordyceps militaris CM01 SUN domain-containing protein (CCM_06664), partial mRNA	sp|Q4WGL5|SUN1_ASPFU/3e-79/Secreted beta-glucosidase sun1 OS=Neosartorya fumigata (strain ATCC MYA-4609 / Af293 / CBS 101355 / FGSC A1100) GN=sun1 PE=1 SV=1	cmt:CCM_06664/0.0/SUN domain-containing protein; K01238 SUN family beta-glucosidase [EC:3.2.1.-]	NA	PTHR31316:SF0/1.3E-125/--	NA
Unigene8454_All	Unigene8454_All	237.46	229.75	226.76	gi|573989883|ref|XP_006672862.1|/0/acetyl-CoA acetyltransferase [Cordyceps militaris CM01] &gt;gi|346319806|gb|EGX89407.1| acetyl-CoA acetyltransferase [Cordyceps militaris CM01]	gi|573989882|ref|XM_006672799.1|/0.0/Cordyceps militaris CM01 acetyl-CoA acetyltransferase (CCM_07659), partial mRNA	sp|Q9UQW6|THIL_SCHPO/4e-145/Acetyl-CoA acetyltransferase OS=Schizosaccharomyces pombe (strain 972 / ATCC 24843) GN=erg10 PE=2 SV=1	cmt:CCM_07659/0.0/acetyl-CoA acetyltransferase; K00626 acetyl-CoA C-acetyltransferase [EC:2.3.1.9]	SPBC215.09c/1e-144/---	PS00098/-/Thiolases acyl-enzyme intermediate signature.	biological_process:GO:0008152//metabolic process;molecular_function:GO:0016747//transferase activity, transferring acyl groups other than amino-acyl groups;
CL2039.Contig1_All	CL2039.Contig1_All	236.89	241.58	239.91	gi|573981285|ref|XP_006668563.1|/0/casein kinase I, putative [Cordyceps militaris CM01] &gt;gi|346325480|gb|EGX95077.1| casein kinase I, putative [Cordyceps militaris CM01]	gi|667651662|ref|XM_008599441.1|/0.0/Beauveria bassiana ARSEF 2860 casein kinase I hhp1 partial mRNA	sp|P40235|HHP1_SCHPO/2e-156/Casein kinase I homolog hhp1 OS=Schizosaccharomyces pombe (strain 972 / ATCC 24843) GN=hhp1 PE=2 SV=1	maw:MAC_00807/0.0/casein kinase I isoform epsilon; K14758 casein kinase I homolog HRR25 [EC:2.7.11.1]	BS_yloP_1/1e-12/---	PS00107/-/Protein kinases ATP-binding region signature.	biological_process:GO:0036289//peptidyl-serine autophosphorylation;GO:0038083//peptidyl-tyrosine autophosphorylation;GO:0045143//homologous chromosome segregation;GO:1990443//peptidyl-threonine autophosphorylation;GO:0006282//regulation of DNA repair;cellular_component:GO:0005634//nucleus;GO:0032153//cell division site;GO:0005829//cytosol;molecular_function:GO:0005524//ATP binding;GO:0004713//pro…
Unigene8128_All	Unigene8128_All	236.3	151.41	209.77	gi|573985929|ref|XP_006670885.1|/2.13285e-59/hypothetical protein CCM_05678 [Cordyceps militaris CM01] &gt;gi|346321921|gb|EGX91520.1| hypothetical protein CCM_05678 [Cordyceps militaris CM01]	gi|667655538|ref|XM_008601379.1|/5e-08/Beauveria bassiana ARSEF 2860 fungal specific transcription factor partial mRNA	NA	NA	NA	NA	biological_process:GO:0006351//transcription, DNA-templated;molecular_function:GO:0005488//binding;
CL797.Contig1_All	CL797.Contig1_All	235.99	250.02	212.75	gi|573987139|ref|XP_006671490.1|/0/Sec20 domain protein [Cordyceps militaris CM01] &gt;gi|346322527|gb|EGX92126.1| Sec20 domain protein [Cordyceps militaris CM01]	gi|573987138|ref|XM_006671427.1|/0.0/Cordyceps militaris CM01 Sec20 domain protein (CCM_06286), partial mRNA	sp|Q6MVH7|IPYR_NEUCR/2e-153/Inorganic pyrophosphatase OS=Neurospora crassa (strain ATCC 24698 / 74-OR23-1A / CBS 708.71 / DSM 1257 / FGSC 987) GN=ipp-1 PE=3 SV=1	cmt:CCM_06286/0.0/Sec20 domain protein; K08497 protein transport protein SEC20	SPAC23C11.05/7e-126/---	PTHR12825/3.7E-35/--	biological_process:GO:0006796//phosphate-containing compound metabolic process;cellular_component:GO:0005634//nucleus;GO:0005737//cytoplasm;molecular_function:GO:0000287//magnesium ion binding;GO:0004427//inorganic diphosphatase activity;
Unigene1523_All	Unigene1523_All	235.87	222.04	189.88	gi|573993467|ref|XP_006674654.1|/2.6071e-156/ran/spi1 binding protein [Cordyceps militaris CM01] &gt;gi|346318231|gb|EGX87835.1| ran/spi1 binding protein [Cordyceps militaris CM01]	gi|573993466|ref|XM_006674591.1|/0.0/Cordyceps militaris CM01 ran/spi1 binding protein (CCM_09457), partial mRNA	sp|Q09717|RANG_SCHPO/1e-60/Ran-specific GTPase-activating protein 1 OS=Schizosaccharomyces pombe (strain 972 / ATCC 24843) GN=sbp1 PE=1 SV=1	cmt:CCM_09457/2e-157/ran/spi1 binding protein; K15306 Ran-binding protein 1	SPBC1773.07c/3e-60/---	SM00160/4.4E-61/Ran-binding domain	biological_process:GO:0006511//ubiquitin-dependent protein catabolic process;GO:0000082//G1/S transition of mitotic cell cycle;GO:0006606//protein import into nucleus;GO:0006405//RNA export from nucleus;cellular_component:GO:0005634//nucleus;GO:0005737//cytoplasm;molecular_function:GO:0008536//Ran GTPase binding;
CL1330.Contig3_All	CL1330.Contig3_All	235.02	225.52	217.68	gi|969882749|gb|KUE99942.1|/0/GTP cyclohydrolase II [Trichoderma gamsii]	gi|667657504|ref|XM_008602362.1|/1e-130/Beauveria bassiana ARSEF 2860 GTP cyclohydrolase II partial mRNA	sp|Q9US41|URG1_SCHPO/6e-162/Uracil-regulated protein 1 OS=Schizosaccharomyces pombe (strain 972 / ATCC 24843) GN=urg1 PE=2 SV=1	adl:AURDEDRAFT_43143/6e-07/GTP cyclohydrolase II; K01497 GTP cyclohydrolase II [EC:3.5.4.25]	SPAC1002.19/2e-161/---	PTHR21327/1.6E-282/--	biological_process:GO:0006412//translation;cellular_component:GO:0005840//ribosome;molecular_function:GO:0016787//hydrolase activity;GO:0003735//structural constituent of ribosome;
Unigene7012_All	Unigene7012_All	234.9	178.13	100.94	gi|573985997|ref|XP_006670919.1|/0/AIF-like mitochondrial oxidoreductase (Nfrl), putative [Cordyceps militaris CM01] &gt;gi|346321955|gb|EGX91554.1| AIF-like mitochondrial oxidoreductase (Nfrl), putative [Cordyceps militaris CM01]	gi|667655616|ref|XM_008601418.1|/0.0/Beauveria bassiana ARSEF 2860 monodehydroascorbate reductase partial mRNA	sp|Q10499|AIF1_SCHPO/9e-111/Apoptosis-inducing factor 1 OS=Schizosaccharomyces pombe (strain 972 / ATCC 24843) GN=aif1 PE=3 SV=3	psq:PUNSTDRAFT_98111/2e-18/nitrite reductase; K17877 nitrite reductase (NAD(P)H) [EC:1.7.1.4]	Cgl2652/2e-40/---	PR00411/1.6E-13/Pyridine nucleotide disulphide reductase class-I signature	biological_process:GO:0055114//oxidation-reduction process;GO:0045454//cell redox homeostasis;cellular_component:GO:0005829//cytosol;molecular_function:GO:0051537//2 iron, 2 sulfur cluster binding;GO:0046872//metal ion binding;GO:0050660//flavin adenine dinucleotide binding;GO:0016491//oxidoreductase activity;
Unigene7203_All	Unigene7203_All	234.73	132.52	87.69	gi|573990679|ref|XP_006673260.1|/4.73364e-112/hypothetical protein CCM_08058 [Cordyceps militaris CM01] &gt;gi|346320204|gb|EGX89805.1| hypothetical protein CCM_08058 [Cordyceps militaris CM01]	gi|573990678|ref|XM_006673197.1|/0.0/Cordyceps militaris CM01 hypothetical protein (CCM_08058), partial mRNA	sp|P47179|DAN4_YEAST/1e-12/Cell wall protein DAN4 OS=Saccharomyces cerevisiae (strain ATCC 204508 / S288c) GN=DAN4 PE=2 SV=1	yli:YALI0B22110g/3e-12/YALI0B22110p; K05747 Wiskott-Aldrich syndrome protein	SPBC28F2.12/3e-07/---	NA	NA
Unigene2445_All	Unigene2445_All	234.34	261.98	225.71	gi|667646909|ref|XP_008595286.1|/4.5844e-179/cytochrome C1 family protein [Beauveria bassiana ARSEF 2860] &gt;gi|400601289|gb|EJP68932.1| cytochrome C1 family protein [Beauveria bassiana ARSEF 2860]	gi|667646908|ref|XM_008597064.1|/0.0/Beauveria bassiana ARSEF 2860 cytochrome C1 family protein partial mRNA	sp|P07142|CY1_NEUCR/4e-148/Cytochrome c1, heme protein, mitochondrial OS=Neurospora crassa (strain ATCC 24698 / 74-OR23-1A / CBS 708.71 / DSM 1257 / FGSC 987) GN=cyt-1 PE=2 SV=1	maw:MAC_03027/5e-165/cytochrome c1, heme protein precursor; K00413 ubiquinol-cytochrome c reductase cytochrome c1 subunit	YOR065w/6e-98/---	PF02167/3.0E-78/Cytochrome C1 family	biological_process:GO:0006122//mitochondrial electron transport, ubiquinol to cytochrome c;cellular_component:GO:0005750//mitochondrial respiratory chain complex III;molecular_function:GO:0020037//heme binding;GO:0045153//electron transporter, transferring electrons within CoQH2-cytochrome c reductase complex activity;
Unigene1396_All	Unigene1396_All	234.04	161.56	33.61	gi|573987503|ref|XP_006671672.1|/0/MFS transporter, putative [Cordyceps militaris CM01] &gt;gi|346320448|gb|EGX90048.1| MFS transporter, putative [Cordyceps militaris CM01]	gi|573987502|ref|XM_006671609.1|/0.0/Cordyceps militaris CM01 MFS transporter, putative (CCM_06468), partial mRNA	sp|Q9USN4|YJA1_SCHPO/4e-87/Uncharacterized transporter C1529.01 OS=Schizosaccharomyces pombe (strain 972 / ATCC 24843) GN=SPCC1529.01 PE=3 SV=2	dha:DEHA2E05786g/5e-84/DEHA2E05786p; K08157 MFS transporter, DHA1 family, multidrug resistance protein	YBR008c/6e-74/---	PF07690/2.3E-43/Major Facilitator Superfamily	biological_process:GO:0055085//transmembrane transport;cellular_component:GO:0016021//integral component of membrane;
CL455.Contig2_All	CL455.Contig2_All	233.87	188.61	32.25	gi|573979676|ref|XP_006667783.1|/0/Fungal transcriptional regulatory protein [Cordyceps militaris CM01] &gt;gi|346324700|gb|EGX94297.1| Fungal transcriptional regulatory protein [Cordyceps militaris CM01]	gi|573979675|ref|XM_006667720.1|/0.0/Cordyceps militaris CM01 Fungal transcriptional regulatory protein (CCM_02568), partial mRNA	sp|Q8TFG4|YL54_SCHPO/8e-17/Uncharacterized protein PB18E9.04c OS=Schizosaccharomyces pombe (strain 972 / ATCC 24843) GN=SPAPB18E9.04c PE=4 SV=1	aor:AOR_1_236094/7e-11/AO090120000140; actin associated protein Wsp1; K05747 Wiskott-Aldrich syndrome protein	Rv0312/6e-06/---	PF00172/4.2E-7/Fungal Zn(2)-Cys(6) binuclear cluster domain	biological_process:GO:0006357//regulation of transcription from RNA polymerase II promoter;cellular_component:GO:0005634//nucleus;molecular_function:GO:0003677//DNA binding;GO:0000981//RNA polymerase II transcription factor activity, sequence-specific DNA binding;GO:0008270//zinc ion binding;
Unigene6707_All	Unigene6707_All	233.54	226.27	236.72	gi|573975526|ref|XP_006665708.1|/0/endochitinase 1 precursor [Cordyceps militaris CM01] &gt;gi|346326235|gb|EGX95831.1| endochitinase 1 precursor [Cordyceps militaris CM01]	gi|573975525|ref|XM_006665645.1|/0.0/Cordyceps militaris CM01 endochitinase 1 precursor (CCM_00485), partial mRNA	sp|C5P230|CHI1_COCP7/1e-134/Endochitinase 1 OS=Coccidioides posadasii (strain C735) GN=CTS1 PE=3 SV=1	cmt:CCM_00485/0.0/endochitinase 1 precursor; K01183 chitinase [EC:3.2.1.14]	BH0916_1/2e-62/---	SM00636/1.4E-133/--	biological_process:GO:0006032//chitin catabolic process;GO:0005975//carbohydrate metabolic process;molecular_function:GO:0004568//chitinase activity;
CL438.Contig1_All	CL438.Contig1_All	233.18	269.77	374	gi|573992099|ref|XP_006673970.1|/0/non-ribosomal peptide synthetase [Cordyceps militaris CM01] &gt;gi|346319123|gb|EGX88725.1| non-ribosomal peptide synthetase [Cordyceps militaris CM01]	gi|573992098|ref|XM_006673907.1|/0.0/Cordyceps militaris CM01 non-ribosomal peptide synthetase (CCM_08771), partial mRNA	sp|Q4WF61|NRPS3_ASPFU/5e-50/Nonribosomal peptide synthetase 3 OS=Neosartorya fumigata (strain ATCC MYA-4609 / Af293 / CBS 101355 / FGSC A1100) GN=NRPS3 PE=2 SV=2	aor:AOR_1_920074/1e-45/AO090038000543; N-(5-amino-5-carboxypentanoyl)-L-cysteinyl-D-valine synthase; K12743 N-(5-amino-5-carboxypentanoyl)-L-cysteinyl-D-valine synthase [EC:6.3.2.26]	Cgl2655_1/1e-165/---	SM00823/2.2E-9/Phosphopantetheine attachment site	biological_process:GO:0008152//metabolic process;cellular_component:GO:0016021//integral component of membrane;molecular_function:GO:0031177//phosphopantetheine binding;GO:0003824//catalytic activity;
Unigene1387_All	Unigene1387_All	232.23	295.9	230.46	gi|573976076|ref|XP_006665983.1|/0/guanine nucleotide-binding protein beta subunit-like protein [Cordyceps militaris CM01] &gt;gi|346326510|gb|EGX96106.1| guanine nucleotide-binding protein beta subunit-like protein [Cordyceps militaris CM01]	gi|573976075|ref|XM_006665920.1|/0.0/Cordyceps militaris CM01 guanine nucleotide-binding protein beta subunit-like protein (CCM_00761), partial mRNA	sp|Q01369|GBLP_NEUCR/3e-177/Guanine nucleotide-binding protein subunit beta-like protein OS=Neurospora crassa (strain ATCC 24698 / 74-OR23-1A / CBS 708.71 / DSM 1257 / FGSC 987) GN=cpc-2 PE=3 SV=1	cmt:CCM_00761/0.0/guanine nucleotide-binding protein beta subunit-like protein; K14753 guanine nucleotide-binding protein subunit beta-2-like 1 protein	all0664/4e-36/---	PTHR12692/3.6E-123/--	biological_process:GO:0060733//regulation of eIF2 alpha phosphorylation by amino acid starvation;GO:0010255//glucose mediated signaling pathway;GO:0007186//G-protein coupled receptor signaling pathway;GO:0032995//regulation of fungal-type cell wall biogenesis;GO:0031139//positive regulation of conjugation with cellular fusion;GO:0035556//intracellular signal transduction;GO:0050790//regulation of…
CL181.Contig2_All	CL181.Contig2_All	232.04	225.72	169.96	gi|573988477|ref|XP_006672159.1|/2.80343e-150/14-3-3 protein [Cordyceps militaris CM01] &gt;gi|346320938|gb|EGX90538.1| 14-3-3 protein [Cordyceps militaris CM01]	gi|573988476|ref|XM_006672096.1|/0.0/Cordyceps militaris CM01 14-3-3 protein (CCM_06958), partial mRNA	sp|O42766|1433_CANAL/9e-98/14-3-3 protein homolog OS=Candida albicans (strain SC5314 / ATCC MYA-2876) GN=BMH1 PE=1 SV=2	cmt:CCM_06958/3e-151/14-3-3 protein; K06630 14-3-3 protein epsilon	YER177w/4e-96/---	PR00305/1.2E-85/14-3-3 protein zeta signature	biological_process:GO:0055114//oxidation-reduction process;molecular_function:GO:0019904//protein domain specific binding;GO:0004497//monooxygenase activity;
Unigene4587_All	Unigene4587_All	231.7	85.68	45.68	gi|573993337|ref|XP_006674589.1|/1.13054e-161/methyl transferase-like protein [Cordyceps militaris CM01] &gt;gi|346318166|gb|EGX87770.1| methyl transferase-like protein [Cordyceps militaris CM01]	gi|573993336|ref|XM_006674526.1|/0.0/Cordyceps militaris CM01 methyl transferase-like protein (CCM_09392), partial mRNA	sp|P37370|VRP1_YEAST/4e-10/Verprolin OS=Saccharomyces cerevisiae (strain ATCC 204508 / S288c) GN=VRP1 PE=1 SV=2	lth:KLTH0G15048g/7e-10/KLTH0G15048p; K05747 Wiskott-Aldrich syndrome protein	mll1644/1e-09/---	PTHR10108/6.2E-24/--	biological_process:GO:0032259//methylation;molecular_function:GO:0008168//methyltransferase activity;
CL200.Contig3_All	CL200.Contig3_All	230.71	247.01	275.78	gi|573987823|ref|XP_006671832.1|/0/actin binding protein, putative [Cordyceps militaris CM01] &gt;gi|346320609|gb|EGX90209.1| actin binding protein, putative [Cordyceps militaris CM01]	gi|667656944|ref|XM_008602082.1|/0.0/Beauveria bassiana ARSEF 2860 SH3 domain-containing protein partial mRNA	sp|Q9P7E8|APP1_SCHPO/6e-59/Protein app1 OS=Schizosaccharomyces pombe (strain 972 / ATCC 24843) GN=app1 PE=2 SV=1	maj:MAA_00200/0.0/Src like protein; K20520 drebrin-like protein	PA0081/2e-11/---	PS51263/24.616/ADF-H domain profile.	cellular_component:GO:0005622//intracellular;GO:0016021//integral component of membrane;molecular_function:GO:0003779//actin binding;
CL106.Contig3_All	CL106.Contig3_All	230.36	340.5	411.42	gi|701774618|gb|KGQ08845.1|/0/hypothetical protein BBAD15_g5815 [Beauveria bassiana D1-5]	gi|667647018|ref|XM_008597119.1|/3e-16/Beauveria bassiana ARSEF 2860 hypothetical protein partial mRNA	sp|G1UBC2|PGA47_CANAL/2e-33/Cell wall adhesin EAP1 OS=Candida albicans (strain SC5314 / ATCC MYA-2876) GN=EAP1 PE=1 SV=1	cmt:CCM_06535/8e-35/class III chitinase ChiA1; K01183 chitinase [EC:3.2.1.14]	mll2848/2e-18/---	NA	NA
CL1932.Contig2_All	CL1932.Contig2_All	229.6	167.32	252.23	gi|573979638|ref|XP_006667764.1|/1.47991e-123/Glutathione S-transferase [Cordyceps militaris CM01] &gt;gi|346324681|gb|EGX94278.1| Glutathione S-transferase [Cordyceps militaris CM01]	gi|573979637|ref|XM_006667701.1|/0.0/Cordyceps militaris CM01 Glutathione S-transferase (CCM_02549), partial mRNA	sp|O59827|GST2_SCHPO/9e-47/Glutathione S-transferase 2 OS=Schizosaccharomyces pombe (strain 972 / ATCC 24843) GN=gst2 PE=2 SV=1	cmt:CCM_02549/1e-124/Glutathione S-transferase; K00799 glutathione S-transferase [EC:2.5.1.18]	SPCC965.07c/2e-46/---	PTHR11260:SF134/6.5E-69/--	molecular_function:GO:0016740//transferase activity;
Unigene8232_All	Unigene8232_All	229.05	256.01	226.19	gi|573979744|ref|XP_006667817.1|/7.19513e-81/40S ribosomal protein S19 (S16) [Cordyceps militaris CM01] &gt;gi|346324734|gb|EGX94331.1| 40S ribosomal protein S19 (S16) [Cordyceps militaris CM01]	gi|573979743|ref|XM_006667754.1|/0.0/Cordyceps militaris CM01 40S ribosomal protein S19 (S16) (CCM_02602), partial mRNA	sp|P27073|RS19_EMENI/9e-69/40S ribosomal protein S19 OS=Emericella nidulans (strain FGSC A4 / ATCC 38163 / CBS 112.46 / NRRL 194 / M139) GN=rps19 PE=3 SV=1	cmt:CCM_02602/7e-82/40S ribosomal protein S19 (S16); K02966 small subunit ribosomal protein S19e	SPBC649.02/8e-50/---	NA	biological_process:GO:0006412//translation;cellular_component:GO:0005840//ribosome;molecular_function:GO:0003735//structural constituent of ribosome;
Unigene2712_All	Unigene2712_All	228.79	201.25	116.03	gi|573989871|ref|XP_006672856.1|/3.17536e-101/hypothetical protein CCM_07653 [Cordyceps militaris CM01] &gt;gi|346319800|gb|EGX89401.1| hypothetical protein CCM_07653 [Cordyceps militaris CM01]	gi|573989870|ref|XM_006672793.1|/1e-155/Cordyceps militaris CM01 hypothetical protein (CCM_07653), partial mRNA	NA	mbe:MBM_03974/5e-39/CDP-alcohol phosphatidyltransferase; K00993 ethanolaminephosphotransferase [EC:2.7.8.1]	NA	NA	NA
Unigene3182_All	Unigene3182_All	228.38	248.25	297.27	gi|573980124|ref|XP_006668007.1|/2.49656e-124/GTP-binding protein SAR1 [Cordyceps militaris CM01] &gt;gi|346324924|gb|EGX94521.1| GTP-binding protein SAR1 [Cordyceps militaris CM01]	gi|573980123|ref|XM_006667944.1|/0.0/Cordyceps militaris CM01 GTP-binding protein SAR1 (CCM_02792), partial mRNA	sp|P0CT17|SAR1_MAGOY/6e-100/Small COPII coat GTPase SAR1 OS=Magnaporthe oryzae (strain Y34) GN=SAR1 PE=2 SV=1	fgr:FGSG_06646/6e-100/GTP-binding protein SAR1; K07953 GTP-binding protein SAR1 [EC:3.6.5.-]	YDL192w/3e-22/---	PR00328/1.2E-67/GTP-binding SAR1 protein signature	biological_process:GO:0003400//regulation of COPII vesicle coating;GO:0006886//intracellular protein transport;GO:0006998//nuclear envelope organization;cellular_component:GO:0070971//endoplasmic reticulum exit site;GO:0030127//COPII vesicle coat;GO:0005794//Golgi apparatus;molecular_function:GO:0003924//GTPase activity;GO:0005525//GTP binding;
Unigene5806_All	Unigene5806_All	227.83	208.08	170.2	gi|573985395|ref|XP_006670618.1|/5.85575e-153/hypothetical protein CCM_05411 [Cordyceps militaris CM01] &gt;gi|346321654|gb|EGX91253.1| hypothetical protein CCM_05411 [Cordyceps militaris CM01]	gi|347005580|gb|CP003002.1|/4e-07/Myceliophthora thermophila ATCC 42464 chromosome 1, complete sequence	sp|P47179|DAN4_YEAST/6e-09/Cell wall protein DAN4 OS=Saccharomyces cerevisiae (strain ATCC 204508 / S288c) GN=DAN4 PE=2 SV=1	fme:FOMMEDRAFT_167708/6e-07/beta and beta-prime subunits of DNA dependent RNA-polymerase; K03006 DNA-directed RNA polymerase II subunit RPB1 [EC:2.7.7.6]	NA	NA	cellular_component:GO:0016021//integral component of membrane;
Unigene1343_All	Unigene1343_All	227.72	278.33	317.93	gi|573989413|ref|XP_006672627.1|/2.88579e-88/cytochrome c oxidase polypeptide V [Cordyceps militaris CM01] &gt;gi|346319570|gb|EGX89171.1| cytochrome c oxidase polypeptide V [Cordyceps militaris CM01]	gi|573989412|ref|XM_006672564.1|/0.0/Cordyceps militaris CM01 cytochrome c oxidase polypeptide V (CCM_07423), partial mRNA	sp|P06810|COX5_NEUCR/5e-51/Cytochrome c oxidase polypeptide 5, mitochondrial OS=Neurospora crassa (strain ATCC 24698 / 74-OR23-1A / CBS 708.71 / DSM 1257 / FGSC 987) GN=cya-4 PE=3 SV=2	cmt:CCM_07423/3e-89/cytochrome c oxidase polypeptide V; K02263 cytochrome c oxidase subunit 4	NA	PTHR10707/1.2E-57/--	biological_process:GO:1902600//hydrogen ion transmembrane transport;cellular_component:GO:0016021//integral component of membrane;GO:0005739//mitochondrion;molecular_function:GO:0004129//cytochrome-c oxidase activity;
Unigene4920_All	Unigene4920_All	227.29	223.64	226.77	gi|573980449|ref|XP_006668158.1|/1.40003e-130/NADH-ubiquinone oxidoreductase 29.9 kDa subunit [Cordyceps militaris CM01] &gt;gi|346325075|gb|EGX94672.1| NADH-ubiquinone oxidoreductase 29.9 kDa subunit [Cordyceps militaris CM01]	gi|573980448|ref|XM_006668095.1|/0.0/Cordyceps militaris CM01 NADH-ubiquinone oxidoreductase 29.9 kDa subunit (CCM_02943), partial mRNA	sp|P24919|NDUA5_NEUCR/5e-55/NADH-ubiquinone oxidoreductase 29.9 kDa subunit, mitochondrial OS=Neurospora crassa (strain ATCC 24698 / 74-OR23-1A / CBS 708.71 / DSM 1257 / FGSC 987) GN=nuo-32 PE=1 SV=1	cmt:CCM_02943/1e-131/NADH-ubiquinone oxidoreductase 29.9 kDa subunit; K03949 NADH dehydrogenase (ubiquinone) 1 alpha subcomplex subunit 5	NA	PTHR12653/3.8E-44/--	biological_process:GO:0022904//respiratory electron transport chain;cellular_component:GO:0005743//mitochondrial inner membrane;molecular_function:GO:0016651//oxidoreductase activity, acting on NAD(P)H;
Unigene3726_All	Unigene3726_All	227.27	281.5	264.39	gi|573987605|ref|XP_006671723.1|/2.08214e-85/60S ribosomal protein L21 [Cordyceps militaris CM01] &gt;gi|346320499|gb|EGX90099.1| 60S ribosomal protein L21 [Cordyceps militaris CM01]	gi|573987604|ref|XM_006671660.1|/0.0/Cordyceps militaris CM01 60S ribosomal protein L21 (CCM_06519), partial mRNA	sp|Q9UUC1|RL21A_SCHPO/1e-53/60S ribosomal protein L21-A OS=Schizosaccharomyces pombe (strain 972 / ATCC 24843) GN=rpl21a PE=3 SV=1	cmt:CCM_06519/2e-86/60S ribosomal protein L21; K02889 large subunit ribosomal protein L21e	SPBC365.03c/3e-53/---	NA	biological_process:GO:0006412//translation;cellular_component:GO:0005840//ribosome;molecular_function:GO:0003735//structural constituent of ribosome;
CL181.Contig1_All	CL181.Contig1_All	226.33	223.6	171.17	gi|573988477|ref|XP_006672159.1|/1.32482e-128/14-3-3 protein [Cordyceps militaris CM01] &gt;gi|346320938|gb|EGX90538.1| 14-3-3 protein [Cordyceps militaris CM01]	gi|573988476|ref|XM_006672096.1|/0.0/Cordyceps militaris CM01 14-3-3 protein (CCM_06958), partial mRNA	sp|Q99002|1433_TRIHA/4e-115/14-3-3 protein homolog OS=Trichoderma harzianum PE=2 SV=1	cmt:CCM_06958/1e-129/14-3-3 protein; K06630 14-3-3 protein epsilon	SPAC8E11.02c/1e-104/---	PR00305/1.6E-86/14-3-3 protein zeta signature	molecular_function:GO:0019904//protein domain specific binding;
Unigene3070_All	Unigene3070_All	225.88	263.43	280.09	gi|573980168|ref|XP_006668029.1|/1.19097e-26/telomere and ribosome associated protein Stm1, putative [Cordyceps militaris CM01] &gt;gi|346324946|gb|EGX94543.1| telomere and ribosome associated protein Stm1, putative [Cordyceps militaris CM01]	gi|667644776|ref|XM_008595998.1|/2e-26/Beauveria bassiana ARSEF 2860 elicitor protein partial mRNA	sp|Q6BVF9|GAR1_DEBHA/3e-07/H/ACA ribonucleoprotein complex subunit 1 OS=Debaryomyces hansenii (strain ATCC 36239 / CBS 767 / JCM 1990 / NBRC 0083 / IGC 2968) GN=GAR1 PE=3 SV=1	val:VDBG_08803/5e-12/elicitor protein; K13199 plasminogen activator inhibitor 1 RNA-binding protein	Cgl1130/6e-06/---	NA	molecular_function:GO:0003676//nucleic acid binding;
Unigene3648_All	Unigene3648_All	225.42	237.45	220.39	gi|573982011|ref|XP_006668926.1|/0/mitochondrial carrier protein, putative [Cordyceps militaris CM01] &gt;gi|346322744|gb|EGX92342.1| mitochondrial carrier protein, putative [Cordyceps militaris CM01]	gi|667661470|ref|XM_008604345.1|/0.0/Beauveria bassiana ARSEF 2860 carrier protein YMC2 partial mRNA	sp|Q09668|RL22_SCHPO/6e-35/60S ribosomal protein L22 OS=Schizosaccharomyces pombe (strain 972 / ATCC 24843) GN=rpl22 PE=1 SV=3	maj:MAA_03032/3e-133/Mitochondrial substrate/solute carrier; K15109 solute carrier family 25 (mitochondrial carnitine/acylcarnitine transporter), member 20/29	XF1267/6e-07/---	NA	biological_process:GO:0055085//transmembrane transport;cellular_component:GO:0016021//integral component of membrane;
Unigene2691_All	Unigene2691_All	225.15	252.62	257.81	gi|573981519|ref|XP_006668680.1|/1.90754e-170/hypothetical protein CCM_03466 [Cordyceps militaris CM01] &gt;gi|346325597|gb|EGX95194.1| hypothetical protein CCM_03466 [Cordyceps militaris CM01]	gi|768900355|gb|CP006244.1|/3e-08/Saccharomyces cerevisiae YJM996 chromosome XVI sequence	sp|P08640|MUC1_YEAST/9e-22/Flocculation protein FLO11 OS=Saccharomyces cerevisiae (strain ATCC 204508 / S288c) GN=MUC1 PE=1 SV=2	sce:YIR019C/1e-20/FLO11, MUC1, STA4; Flo11p; K19851 flocculation protein FLO11	SPBC28F2.12/2e-10/---	PTHR13789/2.0E-50/--	cellular_component:GO:0016021//integral component of membrane;
Unigene3227_All	Unigene3227_All	224.32	209.63	125.16	gi|573985669|ref|XP_006670755.1|/0/ankyrin 2,3/unc44 [Cordyceps militaris CM01] &gt;gi|346321791|gb|EGX91390.1| ankyrin 2,3/unc44 [Cordyceps militaris CM01]	gi|573985668|ref|XM_006670692.1|/0.0/Cordyceps militaris CM01 ankyrin 2,3/unc44 (CCM_05548), partial mRNA	sp|Q755Y0|AKR1_ASHGO/4e-11/Palmitoyltransferase AKR1 OS=Ashbya gossypii (strain ATCC 10895 / CBS 109.51 / FGSC 9923 / NRRL Y-1056) GN=AKR1 PE=3 SV=1	ure:UREG_02211/1e-15/ATP-dependent RNA helicase p62; K12823 ATP-dependent RNA helicase DDX5/DBP2 [EC:3.6.4.13]	all2748/5e-23/---	PS50088/10.018/Ankyrin repeat profile.	NA
Unigene681_All	Unigene681_All	224.2	274.11	193.45	gi|573982185|ref|XP_006669013.1|/0/60S ribosomal protein L4 [Cordyceps militaris CM01] &gt;gi|346322831|gb|EGX92429.1| 60S ribosomal protein L4 [Cordyceps militaris CM01]	gi|573982184|ref|XM_006668950.1|/0.0/Cordyceps militaris CM01 60S ribosomal protein L4 (CCM_03802), partial mRNA	sp|Q9P784|RL4B_SCHPO/8e-124/60S ribosomal protein L4-B OS=Schizosaccharomyces pombe (strain 972 / ATCC 24843) GN=rpl4b PE=3 SV=1	cmt:CCM_03802/0.0/60S ribosomal protein L4; K02930 large subunit ribosomal protein L4e	SPBC1711.06/2e-123/---	PF14374/1.4E-27/60S ribosomal protein L4 C-terminal domain	biological_process:GO:0006412//translation;cellular_component:GO:0005840//ribosome;molecular_function:GO:0003735//structural constituent of ribosome;
CL1200.Contig1_All	CL1200.Contig1_All	224.02	245.73	282.89	gi|573982525|ref|XP_006669183.1|/1.52614e-129/clathrin light chain [Cordyceps militaris CM01] &gt;gi|346323001|gb|EGX92599.1| clathrin light chain [Cordyceps militaris CM01]	gi|573982524|ref|XM_006669120.1|/0.0/Cordyceps militaris CM01 clathrin light chain (CCM_03972), partial mRNA	sp|Q9USP6|CLC1_SCHPO/8e-36/Clathrin light chain OS=Schizosaccharomyces pombe (strain 972 / ATCC 24843) GN=clc1 PE=1 SV=1	pan:PODANSg9093/8e-20/hypothetical protein; K02269 cytochrome c oxidase subunit 7	NA	PF01086/2.6E-69/Clathrin light chain	biological_process:GO:0006886//intracellular protein transport;GO:0031505//fungal-type cell wall organization;GO:0045807//positive regulation of endocytosis;cellular_component:GO:0005768//endosome;GO:0030132//clathrin coat of coated pit;GO:0030130//clathrin coat of trans-Golgi network vesicle;molecular_function:GO:0005198//structural molecule activity;
CL1444.Contig2_All	CL1444.Contig2_All	223.76	176.74	274.1	gi|573985231|ref|XP_006670536.1|/0/hypothetical protein CCM_05329 [Cordyceps militaris CM01] &gt;gi|346321572|gb|EGX91171.1| hypothetical protein CCM_05329 [Cordyceps militaris CM01]	gi|667645986|ref|XM_008596603.1|/1e-159/Beauveria bassiana ARSEF 2860 FAD dependent oxidoreductase partial mRNA	NA	NA	NA	NA	biological_process:GO:0055114//oxidation-reduction process;molecular_function:GO:0016491//oxidoreductase activity;
Unigene2095_All	Unigene2095_All	222.99	185.31	165.93	gi|573984227|ref|XP_006670034.1|/3.39713e-23/hypothetical protein CCM_04825 [Cordyceps militaris CM01] &gt;gi|346323853|gb|EGX93451.1| hypothetical protein CCM_04825 [Cordyceps militaris CM01]	gi|573984226|ref|XM_006669971.1|/6e-94/Cordyceps militaris CM01 hypothetical protein (CCM_04825), partial mRNA	NA	NA	NA	NA	NA
CL1293.Contig1_All	CL1293.Contig1_All	222.65	250.53	251.75	gi|813214636|dbj|GAO47198.1|/1.21936e-127/hypothetical protein G7K_1408-t1 [Saitoella complicata NRRL Y-17804]	gi|21239410|gb|AF510497.1|/0.0/Trichoderma reesei strain QM6a 18S ribosomal RNA gene, partial sequence; internal transcribed spacer 1, 5.8S ribosomal RNA gene, and internal transcribed spacer 2, complete sequence; and 28S ribosomal RNA gene, partial sequence	sp|Q8TGM6|TAR1_YEAST/4e-24/Protein TAR1 OS=Saccharomyces cerevisiae (strain ATCC 204508 / S288c) GN=TAR1 PE=2 SV=1	NA	NA	NA	NA
Unigene8102_All	Unigene8102_All	222.14	189.42	188.98	gi|573989225|ref|XP_006672533.1|/1.07887e-138/hypothetical protein CCM_07329 [Cordyceps militaris CM01] &gt;gi|346319476|gb|EGX89077.1| hypothetical protein CCM_07329 [Cordyceps militaris CM01]	gi|768311758|gb|CP010986.1|/6e-15/Verticillium dahliae VdLs.17 chromosome 7, complete sequence	sp|Q5A5M7|RBR3_CANAL/1e-13/Cell wall protein RBR3 OS=Candida albicans (strain SC5314 / ATCC MYA-2876) GN=RBR3 PE=1 SV=2	sce:YIR019C/1e-12/FLO11, MUC1, STA4; Flo11p; K19851 flocculation protein FLO11	SPBC28F2.12/7e-09/---	NA	NA
Unigene6394_All	Unigene6394_All	221.88	319.71	309.98	gi|573983925|ref|XP_006669883.1|/2.22737e-50/60S ribosomal protein L30 [Cordyceps militaris CM01] &gt;gi|346323702|gb|EGX93300.1| 60S ribosomal protein L30 [Cordyceps militaris CM01]	gi|573983924|ref|XM_006669820.1|/1e-127/Cordyceps militaris CM01 60S ribosomal protein L30 (CCM_04673), partial mRNA	sp|P52808|RL30A_SCHPO/2e-34/60S ribosomal protein L30-1 OS=Schizosaccharomyces pombe (strain 972 / ATCC 24843) GN=rpl30a PE=3 SV=2	cmt:CCM_04673/2e-51/60S ribosomal protein L30; K02908 large subunit ribosomal protein L30e	SPAC9G1.03c/4e-34/---	PF01248/2.5E-14/Ribosomal protein L7Ae/L30e/S12e/Gadd45 family	biological_process:GO:0006412//translation;cellular_component:GO:0005840//ribosome;molecular_function:GO:0003735//structural constituent of ribosome;
Unigene8497_All	Unigene8497_All	220.31	210.15	202.06	gi|573986289|ref|XP_006671065.1|/0/carboxypeptidase Y precursor [Cordyceps militaris CM01] &gt;gi|346322101|gb|EGX91700.1| carboxypeptidase Y precursor [Cordyceps militaris CM01]	gi|573986288|ref|XM_006671002.1|/0.0/Cordyceps militaris CM01 carboxypeptidase Y precursor (CCM_05858), partial mRNA	sp|C7YQJ2|CBPYA_NECH7/0.0/Carboxypeptidase Y homolog A OS=Nectria haematococca (strain 77-13-4 / ATCC MYA-4622 / FGSC 9596 / MPVI) GN=CPYA PE=3 SV=1	maj:MAA_05766/0.0/serine carboxypeptidase; K13289 cathepsin A (carboxypeptidase C) [EC:3.4.16.5]	YMR297w/9e-157/---	PS00131/-/Serine carboxypeptidases, serine active site.	biological_process:GO:0006508//proteolysis;cellular_component:GO:0005773//vacuole;molecular_function:GO:0004185//serine-type carboxypeptidase activity;
CL370.Contig2_All	CL370.Contig2_All	220.03	289.62	347.04	gi|573983149|ref|XP_006669495.1|/0/MFS transporter [Cordyceps militaris CM01] &gt;gi|346323314|gb|EGX92912.1| MFS transporter [Cordyceps militaris CM01]	gi|573983148|ref|XM_006669432.1|/0.0/Cordyceps militaris CM01 MFS transporter (CCM_04284), partial mRNA	sp|P25351|YCR3_YEAST/5e-58/Uncharacterized membrane protein YCR023C OS=Saccharomyces cerevisiae (strain ATCC 204508 / S288c) GN=YCR023C PE=1 SV=2	lth:KLTH0G17226g/8e-06/KLTH0G17226p; K11245 mating pheromone-induced death protein 2	DR0472/1e-18/---	PR01035/1.1E-5/Tetracycline resistance protein signature	biological_process:GO:0055085//transmembrane transport;cellular_component:GO:0016021//integral component of membrane;molecular_function:GO:0005215//transporter activity;
CL808.Contig1_All	CL808.Contig1_All	219.77	189.72	149.03	gi|573988469|ref|XP_006672155.1|/0/cytochrome c peroxidase [Cordyceps militaris CM01] &gt;gi|346320934|gb|EGX90534.1| cytochrome c peroxidase [Cordyceps militaris CM01]	gi|573988468|ref|XM_006672092.1|/0.0/Cordyceps militaris CM01 cytochrome c peroxidase (CCM_06954), partial mRNA	sp|Q4ING3|CCPR_GIBZE/3e-155/Cytochrome c peroxidase, mitochondrial OS=Gibberella zeae (strain PH-1 / ATCC MYA-4620 / FGSC 9075 / NRRL 31084) GN=CCP1 PE=3 SV=1	cmt:CCM_06954/0.0/cytochrome c peroxidase; K00428 cytochrome c peroxidase [EC:1.11.1.5]	YKR066c/5e-71/---	PTHR31356/3.5E-191/--	biological_process:GO:0006979//response to oxidative stress;GO:0098869//cellular oxidant detoxification;GO:0055114//oxidation-reduction process;cellular_component:GO:0016021//integral component of membrane;molecular_function:GO:0046872//metal ion binding;GO:0020037//heme binding;GO:0004601//peroxidase activity;
CL976.Contig1_All	CL976.Contig1_All	219.42	204.19	325.81	gi|573975966|ref|XP_006665928.1|/0/penicillin-binding protein, putative [Cordyceps militaris CM01] &gt;gi|346326455|gb|EGX96051.1| penicillin-binding protein, putative [Cordyceps militaris CM01]	gi|573975963|ref|XM_006665864.1|/1e-165/Cordyceps militaris CM01 hydrolases or acyltransferases (alpha/beta hydrolase superfamily) (CCM_00705), partial mRNA	NA	fme:FOMMEDRAFT_108875/2e-34/proline iminopeptidase protein; K18457 L-proline amide hydrolase [EC:3.5.1.101]	mll0601/8e-20/---	PTHR31944:SF11/1.2E-27/--	biological_process:GO:0006351//transcription, DNA-templated;molecular_function:GO:0016787//hydrolase activity;GO:0016746//transferase activity, transferring acyl groups;
Unigene4798_All	Unigene4798_All	219.38	241.93	92.18	gi|573992179|ref|XP_006674010.1|/0/glucoamylase I precursor [Cordyceps militaris CM01] &gt;gi|346319163|gb|EGX88765.1| glucoamylase I precursor [Cordyceps militaris CM01]	gi|573992178|ref|XM_006673947.1|/0.0/Cordyceps militaris CM01 glucoamylase I precursor (CCM_08811), partial mRNA	sp|P14804|AMYG_NEUCR/0.0/Glucoamylase OS=Neurospora crassa (strain ATCC 24698 / 74-OR23-1A / CBS 708.71 / DSM 1257 / FGSC 987) GN=gla-1 PE=1 SV=3	cmt:CCM_08811/0.0/glucoamylase I precursor; K01178 glucoamylase [EC:3.2.1.3]	SPBC14C8.05c/2e-69/---	PS00820/-/Glucoamylase active site region signature.	biological_process:GO:0000272//polysaccharide catabolic process;molecular_function:GO:2001070//starch binding;GO:0004339//glucan 1,4-alpha-glucosidase activity;
Unigene6717_All	Unigene6717_All	219.3	272.62	360.39	gi|573977462|ref|XP_006666676.1|/1.32277e-140/hypothetical protein CCM_01457 [Cordyceps militaris CM01] &gt;gi|346327203|gb|EGX96799.1| hypothetical protein CCM_01457 [Cordyceps militaris CM01]	gi|768311754|gb|CP010982.1|/4e-38/Verticillium dahliae VdLs.17 chromosome 3, complete sequence	sp|P08640|MUC1_YEAST/7e-15/Flocculation protein FLO11 OS=Saccharomyces cerevisiae (strain ATCC 204508 / S288c) GN=MUC1 PE=1 SV=2	sce:YIR019C/7e-14/FLO11, MUC1, STA4; Flo11p; K19851 flocculation protein FLO11	Rv3876/7e-10/---	NA	NA
Unigene2887_All	Unigene2887_All	218.02	205.09	197.01	gi|573982351|ref|XP_006669096.1|/5.64696e-147/signal sequence receptor alpha chain [Cordyceps militaris CM01] &gt;gi|346322914|gb|EGX92512.1| signal sequence receptor alpha chain [Cordyceps militaris CM01]	gi|573982350|ref|XM_006669033.1|/0.0/Cordyceps militaris CM01 signal sequence receptor alpha chain (CCM_03885), partial mRNA	sp|C5M501|IR222_CANTT/7e-17/Increased recombination centers protein 22-2 OS=Candida tropicalis (strain ATCC MYA-3404 / T1) GN=IRC22-2 PE=3 SV=1	val:VDBG_08875/2e-11/pre-mRNA-splicing factor cwc22; K13100 pre-mRNA-splicing factor CWC22	NA	NA	cellular_component:GO:0016021//integral component of membrane;GO:0005789//endoplasmic reticulum membrane;
Unigene3948_All	Unigene3948_All	217.5	283.13	201.28	gi|573985551|ref|XP_006670696.1|/0/heat shock protein 70 [Cordyceps militaris CM01] &gt;gi|346321732|gb|EGX91331.1| heat shock protein 70 [Cordyceps militaris CM01]	gi|573985550|ref|XM_006670633.1|/0.0/Cordyceps militaris CM01 heat shock protein 70 (CCM_05489), partial mRNA	sp|P87222|HSP75_CANAW/0.0/Heat shock protein SSB1 OS=Candida albicans (strain WO-1) GN=SSB1 PE=1 SV=2	cmt:CCM_05489/0.0/heat shock protein 70; K03283 heat shock 70kDa protein 1/8	YDL229w/0.0/---	PTHR19375/0.0/--	cellular_component:GO:0005829//cytosol;molecular_function:GO:0005524//ATP binding;
Unigene6247_All	Unigene6247_All	217	191.82	179.33	gi|573985511|ref|XP_006670676.1|/0/sphingolipid long chain base sensory protein, putative [Cordyceps militaris CM01] &gt;gi|346321712|gb|EGX91311.1| sphingolipid long chain base sensory protein, putative [Cordyceps militaris CM01]	gi|697065956|ref|XM_009649870.1|/0.0/Verticillium dahliae VdLs.17 sphingolipid long chain base-responsive protein LSP1 partial mRNA	sp|P53252|PIL1_YEAST/7e-114/Sphingolipid long chain base-responsive protein PIL1 OS=Saccharomyces cerevisiae (strain ATCC 204508 / S288c) GN=PIL1 PE=1 SV=1	sce:YIR019C/2e-14/FLO11, MUC1, STA4; Flo11p; K19851 flocculation protein FLO11	SPBC28F2.12/2e-08/---	PTHR31962:SF3/1.5E-175/--	NA
Unigene5797_All	Unigene5797_All	215.67	254.38	259.3	gi|573992453|ref|XP_006674147.1|/7.27925e-178/mitochondrial phosphate carrier protein [Cordyceps militaris CM01] &gt;gi|346319300|gb|EGX88902.1| mitochondrial phosphate carrier protein [Cordyceps militaris CM01]	gi|573992452|ref|XM_006674084.1|/0.0/Cordyceps militaris CM01 mitochondrial phosphate carrier protein (CCM_08949), partial mRNA	sp|P23641|MPCP_YEAST/4e-97/Mitochondrial phosphate carrier protein OS=Saccharomyces cerevisiae (strain ATCC 204508 / S288c) GN=MIR1 PE=1 SV=1	cmt:CCM_08949/7e-179/mitochondrial phosphate carrier protein; K15102 solute carrier family 25 (mitochondrial phosphate transporter), member 3	mlr2363/3e-07/---	PS50920/18.179/Solute carrier (Solcar) repeat profile.	biological_process:GO:0055085//transmembrane transport;cellular_component:GO:0016021//integral component of membrane;
Unigene2081_All	Unigene2081_All	215.04	194.2	162.5	gi|573989081|ref|XP_006672461.1|/1.74391e-110/hypothetical protein CCM_07260 [Cordyceps militaris CM01] &gt;gi|346321240|gb|EGX90840.1| hypothetical protein CCM_07260 [Cordyceps militaris CM01]	gi|573989080|ref|XM_006672398.1|/0.0/Cordyceps militaris CM01 hypothetical protein (CCM_07260), partial mRNA	sp|Q9P6R1|VRP1_SCHPO/1e-13/Verprolin OS=Schizosaccharomyces pombe (strain 972 / ATCC 24843) GN=vrp1 PE=1 SV=1	mrr:Moror_10453/1e-11/actin assembly; K05747 Wiskott-Aldrich syndrome protein	Rv3876/7e-09/---	NA	NA
Unigene1294_All	Unigene1294_All	214.39	170.95	132.63	gi|573992589|ref|XP_006674215.1|/6.811e-111/poly(A) polymerase pla1, putative [Cordyceps militaris CM01] &gt;gi|346319368|gb|EGX88970.1| poly(A) polymerase pla1, putative [Cordyceps militaris CM01]	gi|573992588|ref|XM_006674152.1|/0.0/Cordyceps militaris CM01 poly(A) polymerase pla1, putative (CCM_09017), partial mRNA	NA	NA	NA	PTHR31544/4.9E-15/--	NA
CL1286.Contig2_All	CL1286.Contig2_All	213.86	387.46	3.14	gi|573988833|ref|XP_006672337.1|/8.25994e-107/hypothetical protein CCM_07136 [Cordyceps militaris CM01] &gt;gi|346321116|gb|EGX90716.1| hypothetical protein CCM_07136 [Cordyceps militaris CM01]	gi|573988832|ref|XM_006672274.1|/0.0/Cordyceps militaris CM01 hypothetical protein (CCM_07136), partial mRNA	NA	NA	NA	NA	NA
Unigene7264_All	Unigene7264_All	213.68	242.68	451.1	gi|573991587|ref|XP_006673714.1|/1.42824e-06/O-methyltransferase, putative [Cordyceps militaris CM01] &gt;gi|346318867|gb|EGX88469.1| O-methyltransferase, putative [Cordyceps militaris CM01]	NA	NA	NA	NA	NA	NA
Unigene595_All	Unigene595_All	212.73	227.25	301.72	gi|573974896|ref|XP_006665393.1|/0/oligopeptide transporter [Cordyceps militaris CM01] &gt;gi|346325920|gb|EGX95516.1| oligopeptide transporter [Cordyceps militaris CM01]	gi|573974895|ref|XM_006665330.1|/0.0/Cordyceps militaris CM01 oligopeptide transporter (CCM_00170), partial mRNA	sp|P40900|ISP4_SCHPO/2e-139/Sexual differentiation process protein isp4 OS=Schizosaccharomyces pombe (strain 972 / ATCC 24843) GN=isp4 PE=2 SV=2	sce:YIR019C/1e-25/FLO11, MUC1, STA4; Flo11p; K19851 flocculation protein FLO11	NA	PF03169/2.0E-173/OPT oligopeptide transporter protein	biological_process:GO:0055085//transmembrane transport;cellular_component:GO:0016021//integral component of membrane;
CL1304.Contig1_All	CL1304.Contig1_All	212.6	263.09	189.61	gi|573980346|ref|XP_006668108.1|/3.40621e-52/covalently-linked cell wall protein [Cordyceps militaris CM01] &gt;gi|346325025|gb|EGX94622.1| covalently-linked cell wall protein [Cordyceps militaris CM01]	gi|573980345|ref|XM_006668045.1|/1e-120/Cordyceps militaris CM01 covalently-linked cell wall protein (CCM_02893), partial mRNA	sp|A6ZZG1|PIR3_YEAS7/1e-26/Cell wall mannoprotein PIR3 OS=Saccharomyces cerevisiae (strain YJM789) GN=PIR3 PE=3 SV=1	adl:AURDEDRAFT_146295/3e-06/hypothetical protein; K19475 WAS/WASL-interacting protein	NA	NA	cellular_component:GO:0005618//cell wall;GO:0016021//integral component of membrane;molecular_function:GO:0005199//structural constituent of cell wall;
Unigene7275_All	Unigene7275_All	212.37	140.16	72.67	NA	NA	NA	NA	NA	NA	NA
Unigene4719_All	Unigene4719_All	211.34	252.01	266.47	gi|573993435|ref|XP_006674638.1|/1.75634e-67/60S ribosomal protein L32 [Cordyceps militaris CM01] &gt;gi|346318215|gb|EGX87819.1| 60S ribosomal protein L32 [Cordyceps militaris CM01]	gi|573993434|ref|XM_006674575.1|/0.0/Cordyceps militaris CM01 60S ribosomal protein L32 (CCM_09441), partial mRNA	sp|Q7RXY1|RL32_NEUCR/1e-60/60S ribosomal protein L32 OS=Neurospora crassa (strain ATCC 24698 / 74-OR23-1A / CBS 708.71 / DSM 1257 / FGSC 987) GN=crp-63 PE=3 SV=1	cmt:CCM_09441/2e-68/60S ribosomal protein L32; K02912 large subunit ribosomal protein L32e	SPAC3H5.10/1e-44/---	NA	biological_process:GO:0006412//translation;cellular_component:GO:0022625//cytosolic large ribosomal subunit;molecular_function:GO:0003735//structural constituent of ribosome;
Unigene8463_All	Unigene8463_All	211.25	260.3	349.58	gi|573979904|ref|XP_006667897.1|/0/hypothetical protein CCM_02682 [Cordyceps militaris CM01] &gt;gi|346324814|gb|EGX94411.1| hypothetical protein CCM_02682 [Cordyceps militaris CM01]	gi|699031042|emb|HG970335.1|/9e-12/Fusarium graminearum chromosome 4, complete genome	sp|P08640|MUC1_YEAST/1e-21/Flocculation protein FLO11 OS=Saccharomyces cerevisiae (strain ATCC 204508 / S288c) GN=MUC1 PE=1 SV=2	sce:YIR019C/2e-20/FLO11, MUC1, STA4; Flo11p; K19851 flocculation protein FLO11	YPO2725/2e-09/---	PF11913/1.1E-84/Protein of unknown function (DUF3431)	cellular_component:GO:0016021//integral component of membrane;
Unigene5250_All	Unigene5250_All	209.96	178.54	159.48	gi|573989217|ref|XP_006672529.1|/0/flavin-containing monooxygenase [Cordyceps militaris CM01] &gt;gi|346319472|gb|EGX89073.1| flavin-containing monooxygenase [Cordyceps militaris CM01]	gi|573989216|ref|XM_006672466.1|/0.0/Cordyceps militaris CM01 flavin-containing monooxygenase (CCM_07325), partial mRNA	sp|P08640|MUC1_YEAST/6e-20/Flocculation protein FLO11 OS=Saccharomyces cerevisiae (strain ATCC 204508 / S288c) GN=MUC1 PE=1 SV=2	sce:YIR019C/7e-19/FLO11, MUC1, STA4; Flo11p; K19851 flocculation protein FLO11	SMb20103/7e-128/---	PTHR23023/8.5E-176/--	biological_process:GO:0055114//oxidation-reduction process;molecular_function:GO:0004497//monooxygenase activity;
Unigene4078_All	Unigene4078_All	209.91	201.38	188.08	gi|573982937|ref|XP_006669389.1|/3.31339e-92/phosphatidylglycerol / phosphatidylinositol transfer protein [Cordyceps militaris CM01] &gt;gi|346323207|gb|EGX92805.1| phosphatidylglycerol / phosphatidylinositol transfer protein [Cordyceps militaris CM01]	gi|573982936|ref|XM_006669326.1|/0.0/Cordyceps militaris CM01 phosphatidylglycerol / phosphatidylinositol transfer protein (CCM_04178), partial mRNA	sp|Q52FS9|NPC2_MAGO7/4e-46/Phosphatidylglycerol/phosphatidylinositol transfer protein OS=Magnaporthe oryzae (strain 70-15 / ATCC MYA-4617 / FGSC 8958) GN=NPC2 PE=3 SV=2	sce:YIR019C/4e-06/FLO11, MUC1, STA4; Flo11p; K19851 flocculation protein FLO11	NA	SM00737/1.2E-35/Domain involved in innate immunity and lipid metabolism.	biological_process:GO:0032366//intracellular sterol transport;cellular_component:GO:0000328//fungal-type vacuole lumen;
Unigene2648_All	Unigene2648_All	209.79	107.94	55.21	gi|573992173|ref|XP_006674007.1|/0/siderophore iron transporter mirB [Cordyceps militaris CM01] &gt;gi|346319160|gb|EGX88762.1| siderophore iron transporter mirB [Cordyceps militaris CM01]	gi|573992172|ref|XM_006673944.1|/0.0/Cordyceps militaris CM01 siderophore iron transporter mirB (CCM_08808), partial mRNA	sp|Q870L2|MIRB_EMENI/5e-126/Siderophore iron transporter mirB OS=Emericella nidulans (strain FGSC A4 / ATCC 38163 / CBS 112.46 / NRRL 194 / M139) GN=mirB PE=3 SV=1	psq:PUNSTDRAFT_124252/1e-73/MFS general substrate transporter; K08197 MFS transporter, SIT family, siderophore-iron:H+ symporter	SPAC1399.02/6e-14/---	PF07690/2.3E-13/Major Facilitator Superfamily	biological_process:GO:0055085//transmembrane transport;cellular_component:GO:0016021//integral component of membrane;
Unigene2710_All	Unigene2710_All	208.35	156.39	134.13	gi|573983935|ref|XP_006669888.1|/0/imidazole glycerol phosphate synthase hisHF [Cordyceps militaris CM01] &gt;gi|346323707|gb|EGX93305.1| imidazole glycerol phosphate synthase hisHF [Cordyceps militaris CM01]	gi|573983934|ref|XM_006669825.1|/0.0/Cordyceps militaris CM01 imidazole glycerol phosphate synthase hisHF (CCM_04678), partial mRNA	sp|Q9P4P9|HIS5_EMENI/0.0/Imidazole glycerol phosphate synthase hisHF OS=Emericella nidulans (strain FGSC A4 / ATCC 38163 / CBS 112.46 / NRRL 194 / M139) GN=hisHF PE=3 SV=2	cmt:CCM_04678/0.0/imidazole glycerol phosphate synthase hisHF; K01663 glutamine amidotransferase / cyclase [EC:2.4.2.- 4.1.3.-]	YBR248c_2/4e-128/---	PTHR21235:SF2/1.5E-295/--	biological_process:GO:0000105//histidine biosynthetic process;cellular_component:GO:0005634//nucleus;GO:0005829//cytosol;molecular_function:GO:0004359//glutaminase activity;GO:0016833//oxo-acid-lyase activity;GO:0000107//imidazoleglycerol-phosphate synthase activity;
CL1444.Contig1_All	CL1444.Contig1_All	208.3	166.69	243.15	gi|573985231|ref|XP_006670536.1|/0/hypothetical protein CCM_05329 [Cordyceps militaris CM01] &gt;gi|346321572|gb|EGX91171.1| hypothetical protein CCM_05329 [Cordyceps militaris CM01]	gi|667645986|ref|XM_008596603.1|/1e-159/Beauveria bassiana ARSEF 2860 FAD dependent oxidoreductase partial mRNA	NA	NA	NA	NA	biological_process:GO:0055114//oxidation-reduction process;molecular_function:GO:0016491//oxidoreductase activity;
Unigene4729_All	Unigene4729_All	208.05	226.16	291.21	gi|573977754|ref|XP_006666822.1|/3.36687e-36/NADH:ubiquinone oxidoreductase 6.6kD subunit [Cordyceps militaris CM01] &gt;gi|346327349|gb|EGX96945.1| NADH:ubiquinone oxidoreductase 6.6kD subunit [Cordyceps militaris CM01]	gi|573977753|ref|XM_006666759.1|/1e-119/Cordyceps militaris CM01 NADH:ubiquinone oxidoreductase 6.6kD subunit (CCM_01604), partial mRNA	NA	NA	NA	NA	cellular_component:GO:0016021//integral component of membrane;
Unigene7172_All	Unigene7172_All	208.05	198.32	220.72	gi|573983649|ref|XP_006669745.1|/2.60069e-163/vesicular-fusion protein sec17 [Cordyceps militaris CM01] &gt;gi|346323564|gb|EGX93162.1| vesicular-fusion protein sec17 [Cordyceps militaris CM01]	gi|573983648|ref|XM_006669682.1|/0.0/Cordyceps militaris CM01 vesicular-fusion protein sec17 (CCM_04534), partial mRNA	sp|Q9P6A5|SEC17_NEUCR/1e-96/Probable vesicular-fusion protein sec17 homolog OS=Neurospora crassa (strain ATCC 24698 / 74-OR23-1A / CBS 708.71 / DSM 1257 / FGSC 987) GN=B1D1.150 PE=3 SV=1	cmt:CCM_04534/2e-164/vesicular-fusion protein sec17; K15296 alpha-soluble NSF attachment protein	NA	PR00448/4.8E-38/NSF attachment protein signature	biological_process:GO:0006886//intracellular protein transport;GO:0070317//negative regulation of G0 to G1 transition;cellular_component:GO:0005622//intracellular;
Unigene5201_All	Unigene5201_All	207.54	220.16	257.88	gi|573975852|ref|XP_006665871.1|/2.05324e-164/acetylxylan esterase precursor [Cordyceps militaris CM01] &gt;gi|346326398|gb|EGX95994.1| acetylxylan esterase precursor [Cordyceps militaris CM01]	gi|573975851|ref|XM_006665808.1|/0.0/Cordyceps militaris CM01 acetylxylan esterase precursor (CCM_00649), partial mRNA	sp|Q99034|AXE1_HYPJE/2e-28/Acetylxylan esterase OS=Hypocrea jecorina GN=axe1 PE=1 SV=1	psq:PUNSTDRAFT_107590/2e-28/cutinase-domain-containing protein; K05972 acetylxylan esterase [EC:3.1.1.72]	NA	PF01083/3.3E-38/Cutinase	biological_process:GO:0008152//metabolic process;molecular_function:GO:0016787//hydrolase activity;
Unigene7148_All	Unigene7148_All	206.79	186.76	178.92	gi|573975198|ref|XP_006665544.1|/0/Protein kinase-like domain [Cordyceps militaris CM01] &gt;gi|346326071|gb|EGX95667.1| Protein kinase-like domain [Cordyceps militaris CM01]	gi|573975197|ref|XM_006665481.1|/0.0/Cordyceps militaris CM01 Protein kinase-like domain (CCM_00321), partial mRNA	sp|P13185|KIN1_YEAST/1e-07/Serine/threonine protein kinase KIN1 OS=Saccharomyces cerevisiae (strain ATCC 204508 / S288c) GN=KIN1 PE=1 SV=3	adl:AURDEDRAFT_182712/1e-08/kinase-like protein; K08793 serine/threonine kinase 32 [EC:2.7.11.1]	YAR019c/4e-07/---	PTHR24362/2.8E-17/--	biological_process:GO:0006468//protein phosphorylation;molecular_function:GO:0005524//ATP binding;GO:0004672//protein kinase activity;
CL1742.Contig1_All	CL1742.Contig1_All	205.19	235.63	220.42	gi|573975030|ref|XP_006665460.1|/3.25792e-157/acetyltransferase [Cordyceps militaris CM01] &gt;gi|346325987|gb|EGX95583.1| acetyltransferase [Cordyceps militaris CM01]	gi|573975029|ref|XM_006665397.1|/0.0/Cordyceps militaris CM01 acetyltransferase (CCM_00237), partial mRNA	sp|Q7RVI1|RS5_NEUCR/1e-97/40S ribosomal protein S5 OS=Neurospora crassa (strain ATCC 24698 / 74-OR23-1A / CBS 708.71 / DSM 1257 / FGSC 987) GN=rps-5 PE=3 SV=2	cmt:CCM_00238/3e-113/40S ribosomal protein S5; K02989 small subunit ribosomal protein S5e	SPAC328.10c/3e-79/---	PF00583/1.2E-5/Acetyltransferase (GNAT) family	biological_process:GO:0006412//translation;cellular_component:GO:0015935//small ribosomal subunit;molecular_function:GO:0003723//RNA binding;GO:0003735//structural constituent of ribosome;GO:0008080//N-acetyltransferase activity;
CL432.Contig2_All	CL432.Contig2_All	205.06	233.92	251.97	gi|573991925|ref|XP_006673883.1|/6.65776e-176/Basic leucine zipper [Cordyceps militaris CM01] &gt;gi|346319036|gb|EGX88638.1| Basic leucine zipper [Cordyceps militaris CM01]	gi|573991924|ref|XM_006673820.1|/0.0/Cordyceps militaris CM01 Basic leucine zipper (CCM_08683), partial mRNA	sp|Q8TFF3|HAC1_HYPJE/3e-108/Transcriptional activator hac1 OS=Hypocrea jecorina GN=hac1 PE=2 SV=1	cmt:CCM_08683/6e-177/Basic leucine zipper; K16230 transcriptional activator HAC1	NA	PF07716/2.4E-7/Basic region leucine zipper	biological_process:GO:0006990//positive regulation of transcription from RNA polymerase II promoter involved in unfolded protein response;GO:0010674//negative regulation of transcription from RNA polymerase II promoter involved in meiotic cell cycle;cellular_component:GO:0005634//nucleus;molecular_function:GO:0000981//RNA polymerase II transcription factor activity, sequence-specific DNA binding;…
Unigene6600_All	Unigene6600_All	203.7	190.46	146.36	gi|573980152|ref|XP_006668021.1|/0/RTA1 like protein [Cordyceps militaris CM01] &gt;gi|346324938|gb|EGX94535.1| RTA1 like protein [Cordyceps militaris CM01]	gi|573980151|ref|XM_006667958.1|/0.0/Cordyceps militaris CM01 RTA1 like protein (CCM_02806), partial mRNA	sp|C8ZI10|RSB1_YEAS8/7e-29/Sphingoid long-chain base transporter RSB1 OS=Saccharomyces cerevisiae (strain Lalvin EC1118 / Prise de mousse) GN=RSB1 PE=3 SV=1	val:VDBG_05150/5e-09/cytochrome b2; K00101 L-lactate dehydrogenase (cytochrome) [EC:1.1.2.3]	NA	PF04479/9.5E-43/RTA1 like protein	biological_process:GO:0006950//response to stress;cellular_component:GO:0016021//integral component of membrane;
Unigene2031_All	Unigene2031_All	203.19	254.43	25.21	gi|573984529|ref|XP_006670185.1|/6.52506e-108/hypothetical protein CCM_04977 [Cordyceps militaris CM01] &gt;gi|346324004|gb|EGX93602.1| hypothetical protein CCM_04977 [Cordyceps militaris CM01]	gi|573984528|ref|XM_006670122.1|/0.0/Cordyceps militaris CM01 hypothetical protein (CCM_04977), partial mRNA	NA	NA	NA	NA	NA
Unigene486_All	Unigene486_All	202.16	231.1	267.71	gi|573978956|ref|XP_006667423.1|/3.91369e-68/UPF0041 domain-containing protein [Cordyceps militaris CM01] &gt;gi|346324340|gb|EGX93937.1| UPF0041 domain-containing protein [Cordyceps militaris CM01]	gi|573978955|ref|XM_006667360.1|/0.0/Cordyceps militaris CM01 UPF0041 domain-containing protein (CCM_02208), partial mRNA	sp|P53157|MPC1_YEAST/9e-31/Mitochondrial pyruvate carrier 1 OS=Saccharomyces cerevisiae (strain ATCC 204508 / S288c) GN=FMP37 PE=1 SV=1	tmn:UCRPA7_6671/6e-53/putative upf0041 domain-containing protein; K11086 small nuclear ribonucleoprotein B and B'	NA	PTHR14154/4.9E-51/--	biological_process:GO:1901475//pyruvate transmembrane transport;GO:0006850//mitochondrial pyruvate transport;cellular_component:GO:0031305//integral component of mitochondrial inner membrane;molecular_function:GO:0050833//pyruvate transmembrane transporter activity;
Unigene397_All	Unigene397_All	201.62	221.5	336.68	gi|573981377|ref|XP_006668609.1|/7.28365e-71/hypothetical protein CCM_03395 [Cordyceps militaris CM01] &gt;gi|346325526|gb|EGX95123.1| hypothetical protein CCM_03395 [Cordyceps militaris CM01]	gi|953400747|ref|XM_014689130.1|/6e-11/Metarhizium brunneum ARSEF 3297 fatty acid desaturase partial mRNA	sp|Q8TFG4|YL54_SCHPO/7e-07/Uncharacterized protein PB18E9.04c OS=Schizosaccharomyces pombe (strain 972 / ATCC 24843) GN=SPAPB18E9.04c PE=4 SV=1	erc:Ecym_7349/5e-06/hypothetical protein; K19849 signaling mucin MSB2	CC3231/8e-06/---	PF07955/6.2E-16/Protein of unknown function (DUF1687)	biological_process:GO:0055114//oxidation-reduction process;cellular_component:GO:0005739//mitochondrion;molecular_function:GO:0016491//oxidoreductase activity;
Unigene2011_All	Unigene2011_All	201.15	224.72	222.63	gi|302901691|ref|XP_003048490.1|/1.39729e-113/predicted protein [Nectria haematococca mpVI 77-13-4] &gt;gi|256729423|gb|EEU42777.1| predicted protein [Nectria haematococca mpVI 77-13-4]	gi|667652054|ref|XM_008599637.1|/0.0/Beauveria bassiana ARSEF 2860 Ras family protein partial mRNA	sp|P17610|YPT3_SCHPO/7e-81/GTP-binding protein ypt3 OS=Schizosaccharomyces pombe (strain 972 / ATCC 24843) GN=ypt3 PE=1 SV=1	fgr:FGSG_04327/3e-114/GTP-binding protein ypt3; K07904 Ras-related protein Rab-11A	SPAC18G6.03/2e-80/---	NA	biological_process:GO:0007264//small GTPase mediated signal transduction;cellular_component:GO:0005622//intracellular;molecular_function:GO:0005525//GTP binding;
Unigene4157_All	Unigene4157_All	201.06	123.51	81.71	gi|573974830|ref|XP_006665360.1|/0/oxalate decarboxylase oxdC [Cordyceps militaris CM01] &gt;gi|346325887|gb|EGX95483.1| oxalate decarboxylase oxdC [Cordyceps militaris CM01]	gi|573974829|ref|XM_006665297.1|/0.0/Cordyceps militaris CM01 oxalate decarboxylase oxdC (CCM_00137), partial mRNA	sp|Q8TFG4|YL54_SCHPO/5e-21/Uncharacterized protein PB18E9.04c OS=Schizosaccharomyces pombe (strain 972 / ATCC 24843) GN=SPAPB18E9.04c PE=4 SV=1	sce:YIR019C/2e-18/FLO11, MUC1, STA4; Flo11p; K19851 flocculation protein FLO11	BS_yvrK/4e-122/---	PTHR31238/3.0E-116/--	biological_process:GO:0033609//oxalate metabolic process;molecular_function:GO:0045735//nutrient reservoir activity;
Unigene2953_All	Unigene2953_All	200.97	334.29	196.82	gi|573974880|ref|XP_006665385.1|/3.73872e-80/hypothetical protein CCM_00162 [Cordyceps militaris CM01] &gt;gi|346325912|gb|EGX95508.1| hypothetical protein CCM_00162 [Cordyceps militaris CM01]	gi|573974879|ref|XM_006665322.1|/0.0/Cordyceps militaris CM01 hypothetical protein (CCM_00162), partial mRNA	NA	NA	NA	NA	NA
Unigene8363_All	Unigene8363_All	200.62	196.43	122.73	gi|573978954|ref|XP_006667422.1|/0/pyruvate carboxylase [Cordyceps militaris CM01] &gt;gi|346324339|gb|EGX93936.1| pyruvate carboxylase [Cordyceps militaris CM01]	gi|573978953|ref|XM_006667359.1|/0.0/Cordyceps militaris CM01 pyruvate carboxylase (CCM_02207), partial mRNA	sp|O93918|PYC_ASPTE/0.0/Pyruvate carboxylase OS=Aspergillus terreus GN=pyc PE=2 SV=1	cmt:CCM_02207/0.0/pyruvate carboxylase; K01958 pyruvate carboxylase [EC:6.4.1.1]	YBR218c/0.0/---	PTHR18866/0.0/--	biological_process:GO:0006090//pyruvate metabolic process;GO:0006094//gluconeogenesis;cellular_component:GO:0005829//cytosol;GO:0016021//integral component of membrane;molecular_function:GO:0004736//pyruvate carboxylase activity;GO:0004075//biotin carboxylase activity;GO:0003677//DNA binding;GO:0005524//ATP binding;GO:0009374//biotin binding;GO:0046872//metal ion binding;
Unigene4565_All	Unigene4565_All	200.59	160.89	240.02	gi|573976876|ref|XP_006666383.1|/3.51948e-138/Thioredoxin-like protein [Cordyceps militaris CM01] &gt;gi|346326910|gb|EGX96506.1| Thioredoxin-like protein [Cordyceps militaris CM01]	gi|573976875|ref|XM_006666320.1|/0.0/Cordyceps militaris CM01 Thioredoxin-like protein (CCM_01163), partial mRNA	NA	val:VDBG_05150/6e-06/cytochrome b2; K00101 L-lactate dehydrogenase (cytochrome) [EC:1.1.2.3]	NA	NA	molecular_function:GO:0016740//transferase activity;
Unigene5574_All	Unigene5574_All	200.57	81.7	91.84	gi|573976428|ref|XP_006666159.1|/2.10122e-56/hypothetical protein CCM_00938 [Cordyceps militaris CM01] &gt;gi|346326686|gb|EGX96282.1| hypothetical protein CCM_00938 [Cordyceps militaris CM01]	gi|573976427|ref|XM_006666096.1|/1e-176/Cordyceps militaris CM01 hypothetical protein (CCM_00938), partial mRNA	NA	NA	NA	NA	NA
Unigene6480_All	Unigene6480_All	200.5	385.65	116.4	gi|573992059|ref|XP_006673950.1|/1.05715e-111/extracellular serine-rich protein [Cordyceps militaris CM01] &gt;gi|346319103|gb|EGX88705.1| extracellular serine-rich protein [Cordyceps militaris CM01]	gi|573992058|ref|XM_006673887.1|/0.0/Cordyceps militaris CM01 extracellular serine-rich protein (CCM_08751), partial mRNA	sp|Q2H922|PAN1_CHAGB/1e-14/Actin cytoskeleton-regulatory complex protein PAN1 OS=Chaetomium globosum (strain ATCC 6205 / CBS 148.51 / DSM 1962 / NBRC 6347 / NRRL 1970) GN=PAN1 PE=3 SV=1	aor:AOR_1_236094/4e-16/AO090120000140; actin associated protein Wsp1; K05747 Wiskott-Aldrich syndrome protein	YPO2725/3e-10/---	NA	NA
Unigene6526_All	Unigene6526_All	200.34	212.96	261.35	gi|573981301|ref|XP_006668571.1|/9.59757e-84/vacuolar ATP synthase 16 kDa proteolipid subunit 2 [Cordyceps militaris CM01] &gt;gi|667658735|ref|XP_008601199.1| V-type ATPase [Beauveria bassiana ARSEF 2860] &gt;gi|346325488|gb|EGX95085.1| vacuolar ATP synthase 16 kDa proteolipid subunit 2 [Cordyceps militaris CM01] &gt;gi|400595270|gb|EJP63075.1| V-type ATPase [Beauveria bassiana ARSEF 2860] &gt;g…	gi|573981300|ref|XM_006668508.1|/0.0/Cordyceps militaris CM01 vacuolar ATP synthase 16 kDa proteolipid subunit 2 (CCM_03357), partial mRNA	sp|Q9Y874|VATL2_NEUCR/3e-72/V-type proton ATPase 16 kDa proteolipid subunit 2 OS=Neurospora crassa (strain ATCC 24698 / 74-OR23-1A / CBS 708.71 / DSM 1257 / FGSC 987) GN=vma-11 PE=2 SV=2	cmt:CCM_03357/9e-85/vacuolar ATP synthase 16 kDa proteolipid subunit 2; K02155 V-type H+-transporting ATPase 16kDa proteolipid subunit	YPL234c/1e-52/---	PTHR10263/3.5E-100/--	biological_process:GO:0015991//ATP hydrolysis coupled proton transport;cellular_component:GO:0005774//vacuolar membrane;GO:0033179//proton-transporting V-type ATPase, V0 domain;GO:0005783//endoplasmic reticulum;GO:0000324//fungal-type vacuole;GO:0016021//integral component of membrane;molecular_function:GO:0015078//hydrogen ion transmembrane transporter activity;
CL2133.Contig2_All	CL2133.Contig2_All	200.32	202.37	206.84	gi|927760318|gb|KPA43377.1|/2.26025e-99/pre-mrna-splicing factor srp1 [Fusarium langsethiae]	gi|667656876|ref|XM_008602048.1|/1e-130/Beauveria bassiana ARSEF 2860 pre-mRNA-splicing factor srp1 partial mRNA	sp|Q10193|SRP1_SCHPO/2e-34/Pre-mRNA-splicing factor srp1 OS=Schizosaccharomyces pombe (strain 972 / ATCC 24843) GN=srp1 PE=1 SV=3	yli:YALI0E31551g/3e-17/YALI0E31551p; K12735 peptidyl-prolyl cis-trans isomerase-like 4 [EC:5.2.1.8]	PA2976/2e-08/---	SM00360/4.8E-13/RNA recognition motif	molecular_function:GO:0000166//nucleotide binding;GO:0003676//nucleic acid binding;
Unigene6615_All	Unigene6615_All	200.07	218.74	171.93	gi|573980599|ref|XP_006668220.1|/0/cell division control protein 3 [Cordyceps militaris CM01] &gt;gi|346325137|gb|EGX94734.1| cell division control protein 3 [Cordyceps militaris CM01]	gi|573980598|ref|XM_006668157.1|/0.0/Cordyceps militaris CM01 cell division control protein 3 (CCM_03005), partial mRNA	sp|P39826|CDC3_CANAX/2e-138/Cell division control protein 3 OS=Candida albicans GN=CDC3 PE=3 SV=1	cmt:CCM_03005/0.0/cell division control protein 3; K16944 septin 7	SPAC4F10.11/5e-133/---	PF00735/8.7E-121/Septin	biological_process:GO:0051301//cell division;molecular_function:GO:0005525//GTP binding;
Unigene3919_All	Unigene3919_All	199.95	226.76	243.53	gi|667651843|ref|XP_008597753.1|/9.11792e-30/protein translocation complex subunit SSS1 [Beauveria bassiana ARSEF 2860] &gt;gi|400598787|gb|EJP66494.1| protein translocation complex subunit SSS1 [Beauveria bassiana ARSEF 2860]	gi|667651842|ref|XM_008599531.1|/6e-76/Beauveria bassiana ARSEF 2860 protein translocation complex subunit SSS1 partial mRNA	sp|Q9C2D4|SC61G_NEUCR/2e-24/Probable protein transport protein Sec61 subunit gamma OS=Neurospora crassa (strain ATCC 24698 / 74-OR23-1A / CBS 708.71 / DSM 1257 / FGSC 987) GN=9G6.310 PE=3 SV=2	mbe:MBM_06289/1e-22/protein secE/sec61-gamma protein; K07342 protein transport protein SEC61 subunit gamma and related proteins	SPAC4G8.02c/4e-20/---	NA	biological_process:GO:0006616//SRP-dependent cotranslational protein targeting to membrane, translocation;GO:0031204//posttranslational protein targeting to membrane, translocation;cellular_component:GO:0071261//Ssh1 translocon complex;GO:0005784//Sec61 translocon complex;GO:0016021//integral component of membrane;molecular_function:GO:0015450//P-P-bond-hydrolysis-driven protein transmembrane tra…
Unigene5425_All	Unigene5425_All	199.4	120.87	191.63	gi|573983767|ref|XP_006669804.1|/4.9522e-109/DUF567 domain protein [Cordyceps militaris CM01] &gt;gi|346323623|gb|EGX93221.1| DUF567 domain protein [Cordyceps militaris CM01]	gi|573983766|ref|XM_006669741.1|/0.0/Cordyceps militaris CM01 DUF567 domain protein (CCM_04593), partial mRNA	NA	NA	NA	NA	NA
Unigene3026_All	Unigene3026_All	198.93	198.58	225.28	gi|573974754|ref|XP_006665322.1|/4.24213e-93/succinate dehydrogenase cytochrome b small subunit [Cordyceps militaris CM01] &gt;gi|346325849|gb|EGX95445.1| succinate dehydrogenase cytochrome b small subunit [Cordyceps militaris CM01]	gi|573974753|ref|XM_006665259.1|/0.0/Cordyceps militaris CM01 succinate dehydrogenase cytochrome b small subunit (CCM_00099), partial mRNA	sp|Q7SGY6|DHSD_NEUCR/4e-50/Succinate dehydrogenase [ubiquinone] cytochrome b small subunit, mitochondrial OS=Neurospora crassa (strain ATCC 24698 / 74-OR23-1A / CBS 708.71 / DSM 1257 / FGSC 987) GN=B18P24.060 PE=3 SV=1	cmt:CCM_00099/4e-94/succinate dehydrogenase cytochrome b small subunit; K00237 succinate dehydrogenase (ubiquinone) membrane anchor subunit	NA	PTHR13337/1.3E-52/--	cellular_component:GO:0005740//mitochondrial envelope;GO:0016021//integral component of membrane;
Unigene574_All	Unigene574_All	198.82	205.02	169	gi|573983705|ref|XP_006669773.1|/0/heat shock protein 60 (Antigen HIS-62) [Cordyceps militaris CM01] &gt;gi|346323592|gb|EGX93190.1| heat shock protein 60 (Antigen HIS-62) [Cordyceps militaris CM01]	gi|573983704|ref|XM_006669710.1|/0.0/Cordyceps militaris CM01 heat shock protein 60 (Antigen HIS-62) (CCM_04562), partial mRNA	sp|Q5B041|HSP60_EMENI/0.0/Heat shock protein 60 OS=Emericella nidulans (strain FGSC A4 / ATCC 38163 / CBS 112.46 / NRRL 194 / M139) GN=hsp60 PE=1 SV=1	cmt:CCM_04562/0.0/heat shock protein 60 (Antigen HIS-62); K04077 chaperonin GroEL	SPAC12G12.04/0.0/---	PF00118/1.3E-119/TCP-1/cpn60 chaperonin family	biological_process:GO:0006458//'de novo' protein folding;GO:0051131//chaperone-mediated protein complex assembly;GO:0051604//protein maturation;GO:0050821//protein stabilization;GO:0042026//protein refolding;GO:0045041//protein import into mitochondrial intermembrane space;cellular_component:GO:0042645//mitochondrial nucleoid;GO:0005758//mitochondrial intermembrane space;GO:0031966//mitochondrial…
Unigene525_All	Unigene525_All	198.63	233.53	194.79	gi|573987601|ref|XP_006671721.1|/0/mRNA splicing protein, putative [Cordyceps militaris CM01] &gt;gi|346320497|gb|EGX90097.1| mRNA splicing protein, putative [Cordyceps militaris CM01]	gi|573987602|ref|XM_006671659.1|/0.0/Cordyceps militaris CM01 40S ribosomal protein S9 (S7) (CCM_06518), partial mRNA	sp|Q51LA6|SLU7_MAGO7/0.0/Pre-mRNA-splicing factor SLU7 OS=Magnaporthe oryzae (strain 70-15 / ATCC MYA-4617 / FGSC 8958) GN=SLU7 PE=3 SV=1	maj:MAA_03714/0.0/Pre-mRNA splicing Prp18-interacting factor; K12819 pre-mRNA-processing factor SLU7	SPBC29A3.12/1e-84/---	PTHR12942/9.0E-171/--	biological_process:GO:0000350//generation of catalytic spliceosome for second transesterification step;GO:0045292//mRNA cis splicing, via spliceosome;cellular_component:GO:0071021//U2-type post-spliceosomal complex;
Unigene8374_All	Unigene8374_All	198.06	261.44	188.53	gi|573988627|ref|XP_006672234.1|/0/glucosamine-fructose-6-phosphate aminotransferase [Cordyceps militaris CM01] &gt;gi|346321013|gb|EGX90613.1| glucosamine-fructose-6-phosphate aminotransferase [Cordyceps militaris CM01]	gi|573988626|ref|XM_006672171.1|/0.0/Cordyceps militaris CM01 glucosamine-fructose-6-phosphate aminotransferase (CCM_07033), partial mRNA	sp|P53704|GFA1_CANAL/0.0/Glutamine--fructose-6-phosphate aminotransferase [isomerizing] OS=Candida albicans (strain SC5314 / ATCC MYA-2876) GN=GFA1 PE=1 SV=2	cmt:CCM_07033/0.0/glucosamine-fructose-6-phosphate aminotransferase; K00820 glucosamine--fructose-6-phosphate aminotransferase (isomerizing) [EC:2.6.1.16]	YKL104c/0.0/---	PF13522/3.0E-19/Glutamine amidotransferase domain	biological_process:GO:1901137//carbohydrate derivative biosynthetic process;GO:0005975//carbohydrate metabolic process;cellular_component:GO:0016021//integral component of membrane;molecular_function:GO:0030246//carbohydrate binding;GO:0004360//glutamine-fructose-6-phosphate transaminase (isomerizing) activity;
Unigene1853_All	Unigene1853_All	197.86	135.24	77.29	gi|573992955|ref|XP_006674398.1|/0/glutathione reductase [Cordyceps militaris CM01] &gt;gi|346318462|gb|EGX88065.1| glutathione reductase [Cordyceps militaris CM01]	gi|573992954|ref|XM_006674335.1|/0.0/Cordyceps militaris CM01 glutathione reductase (CCM_09201), partial mRNA	sp|Q873E8|GSHR_NEUCR/0.0/Glutathione reductase OS=Neurospora crassa (strain ATCC 24698 / 74-OR23-1A / CBS 708.71 / DSM 1257 / FGSC 987) GN=gtr-1 PE=3 SV=1	cmt:CCM_09201/0.0/glutathione reductase; K00383 glutathione reductase (NADPH) [EC:1.8.1.7]	SPBC17A3.07/2e-147/---	PF02852/6.5E-33/Pyridine nucleotide-disulphide oxidoreductase, dimerisation domain	biological_process:GO:0055114//oxidation-reduction process;GO:0045454//cell redox homeostasis;GO:0006749//glutathione metabolic process;GO:0098869//cellular oxidant detoxification;cellular_component:GO:0005623//cell;molecular_function:GO:0050660//flavin adenine dinucleotide binding;GO:0050661//NADP binding;GO:0004362//glutathione-disulfide reductase activity;
Unigene5478_All	Unigene5478_All	197.09	218.68	214.01	gi|573974694|ref|XP_006665292.1|/0/srpk, putative [Cordyceps militaris CM01] &gt;gi|346325819|gb|EGX95415.1| srpk, putative [Cordyceps militaris CM01]	gi|667658532|ref|XM_008602876.1|/8e-27/Beauveria bassiana ARSEF 2860 serine-threonine protein kinase partial mRNA	sp|P36616|DSK1_SCHPO/1e-29/Protein kinase dsk1 OS=Schizosaccharomyces pombe (strain 972 / ATCC 24843) GN=dsk1 PE=3 SV=2	cim:CIMG_02972/3e-106/CMGC/SRPK protein kinase; K08832 serine/threonine-protein kinase SRPK3 [EC:2.7.11.1]	ML0016_1/6e-07/---	PS50011/27.623/Protein kinase domain profile.	biological_process:GO:0006468//protein phosphorylation;molecular_function:GO:0005524//ATP binding;GO:0004672//protein kinase activity;
Unigene5832_All	Unigene5832_All	197.08	231.25	200.76	gi|573984963|ref|XP_006670402.1|/0/ubiquinol-cytochrome-c reductase complex core protein 2 [Cordyceps militaris CM01] &gt;gi|346321438|gb|EGX91037.1| ubiquinol-cytochrome-c reductase complex core protein 2 [Cordyceps militaris CM01]	gi|573984962|ref|XM_006670339.1|/0.0/Cordyceps militaris CM01 ubiquinol-cytochrome-c reductase complex core protein 2 (CCM_05194), partial mRNA	sp|O60044|QCR2_NEUCR/2e-145/Cytochrome b-c1 complex subunit 2, mitochondrial OS=Neurospora crassa (strain ATCC 24698 / 74-OR23-1A / CBS 708.71 / DSM 1257 / FGSC 987) GN=qcr-2 PE=2 SV=2	cmt:CCM_05194/0.0/ubiquinol-cytochrome-c reductase complex core protein 2; K00415 ubiquinol-cytochrome c reductase core subunit 2	SPCC613.10/9e-56/---	PF05193/8.1E-16/Peptidase M16 inactive domain	biological_process:GO:1902600//hydrogen ion transmembrane transport;GO:0009060//aerobic respiration;GO:0006122//mitochondrial electron transport, ubiquinol to cytochrome c;cellular_component:GO:0005750//mitochondrial respiratory chain complex III;GO:0030061//mitochondrial crista;molecular_function:GO:0046872//metal ion binding;GO:0008121//ubiquinol-cytochrome-c reductase activity;
Unigene1795_All	Unigene1795_All	196.68	103.88	32.94	gi|573987969|ref|XP_006671905.1|/0/long-chain-fatty-acid-CoA ligase, putative [Cordyceps militaris CM01] &gt;gi|346320684|gb|EGX90284.1| long-chain-fatty-acid-CoA ligase, putative [Cordyceps militaris CM01]	gi|573987966|ref|XM_006671841.1|/0.0/Cordyceps militaris CM01 Siderophore biosynthesis protein (CCM_06700), partial mRNA	sp|P38137|FAT2_YEAST/2e-33/Peroxisomal-coenzyme A synthetase OS=Saccharomyces cerevisiae (strain ATCC 204508 / S288c) GN=PCS60 PE=1 SV=1	ncr:NCU06063/0.0/long-chain-fatty-acid-CoA ligase; K01897 long-chain acyl-CoA synthetase [EC:6.2.1.3]	MTH657/2e-106/---	PF13193/2.1E-10/AMP-binding enzyme C-terminal domain	biological_process:GO:0008152//metabolic process;cellular_component:GO:0016021//integral component of membrane;molecular_function:GO:0016874//ligase activity;
Unigene3324_All	Unigene3324_All	196.04	271.91	388.39	gi|573986613|ref|XP_006671227.1|/0/Peptidase A1 [Cordyceps militaris CM01] &gt;gi|346322264|gb|EGX91863.1| Peptidase A1 [Cordyceps militaris CM01]	gi|573986612|ref|XM_006671164.1|/0.0/Cordyceps militaris CM01 Peptidase A1 (CCM_06020), partial mRNA	sp|Q8NKB6|OPSB_ASPOR/2e-72/Probable aspartic-type endopeptidase opsB OS=Aspergillus oryzae (strain ATCC 42149 / RIB 40) GN=opsB PE=2 SV=1	cthr:CTHT_0055140/1e-118/mitochondrial elongation factor g 1-like protein; K02355 elongation factor G	NA	PTHR13683/8.8E-114/--	biological_process:GO:0006508//proteolysis;cellular_component:GO:0016021//integral component of membrane;molecular_function:GO:0004190//aspartic-type endopeptidase activity;
Unigene1400_All	Unigene1400_All	195.47	211.35	163.74	gi|573986691|ref|XP_006671266.1|/0/pyruvate kinase [Cordyceps militaris CM01] &gt;gi|346322303|gb|EGX91902.1| pyruvate kinase [Cordyceps militaris CM01]	gi|573986690|ref|XM_006671203.1|/0.0/Cordyceps militaris CM01 pyruvate kinase (CCM_06062), partial mRNA	sp|P31865|KPYK_HYPJE/0.0/Pyruvate kinase OS=Hypocrea jecorina GN=pki1 PE=3 SV=1	cmt:CCM_06062/0.0/pyruvate kinase; K00873 pyruvate kinase [EC:2.7.1.40]	SPAC4H3.10c/3e-170/---	PR01050/1.7E-77/Pyruvate kinase family signature	biological_process:GO:0061621//canonical glycolysis;GO:0042866//pyruvate biosynthetic process;cellular_component:GO:0005829//cytosol;molecular_function:GO:0000287//magnesium ion binding;GO:0030955//potassium ion binding;GO:0004743//pyruvate kinase activity;GO:0016301//kinase activity;
Unigene7889_All	Unigene7889_All	195.07	158.05	334.28	gi|573975828|ref|XP_006665859.1|/3.82777e-08/hypothetical protein CCM_00636 [Cordyceps militaris CM01] &gt;gi|346326386|gb|EGX95982.1| hypothetical protein CCM_00636 [Cordyceps militaris CM01]	gi|758998816|ref|XM_011396658.1|/6e-09/Neurospora crassa OR74A copper metallothionein (cmt), mRNA	sp|P02807|MT_NEUCR/3e-07/Metallothionein OS=Neurospora crassa (strain ATCC 24698 / 74-OR23-1A / CBS 708.71 / DSM 1257 / FGSC 987) GN=cmt PE=1 SV=2	NA	NA	NA	NA
Unigene4597_All	Unigene4597_All	195	221.22	198.17	gi|573984127|ref|XP_006669984.1|/6.02691e-116/ATP synthase F1 delta subunit [Cordyceps militaris CM01] &gt;gi|346323803|gb|EGX93401.1| ATP synthase F1 delta subunit [Cordyceps militaris CM01]	gi|573984126|ref|XM_006669921.1|/0.0/Cordyceps militaris CM01 ATP synthase F1 delta subunit (CCM_04775), partial mRNA	sp|Q9P602|ATPO_NEUCR/2e-73/ATP synthase subunit 5, mitochondrial OS=Neurospora crassa (strain ATCC 24698 / 74-OR23-1A / CBS 708.71 / DSM 1257 / FGSC 987) GN=atp-5 PE=3 SV=2	cmt:CCM_04775/6e-117/ATP synthase F1 delta subunit; K02137 F-type H+-transporting ATPase subunit O	YDR298c/4e-42/---	NA	biological_process:GO:0015986//ATP synthesis coupled proton transport;cellular_component:GO:0000274//mitochondrial proton-transporting ATP synthase, stator stalk;molecular_function:GO:0046933//proton-transporting ATP synthase activity, rotational mechanism;GO:0046961//proton-transporting ATPase activity, rotational mechanism;
Unigene1914_All	Unigene1914_All	194.18	187.92	232.77	gi|573990841|ref|XP_006673341.1|/2.22417e-94/hypothetical protein CCM_08139 [Cordyceps militaris CM01] &gt;gi|346320285|gb|EGX89886.1| hypothetical protein CCM_08139 [Cordyceps militaris CM01]	gi|573990842|ref|XM_006673279.1|/6e-83/Cordyceps militaris CM01 hydroxyisourate hydrolase (CCM_08140), partial mRNA	sp|P32643|TMT1_YEAST/2e-16/Trans-aconitate 3-methyltransferase OS=Saccharomyces cerevisiae (strain ATCC 204508 / S288c) GN=TMT1 PE=1 SV=1	cmt:CCM_08140/2e-43/hydroxyisourate hydrolase; K07127 5-hydroxyisourate hydrolase [EC:3.5.2.17]	YER175c/4e-16/---	PF08241/3.0E-12/Methyltransferase domain	NA
Unigene6435_All	Unigene6435_All	193.9	190.73	212.73	gi|573984573|ref|XP_006670207.1|/4.05129e-62/hypothetical protein CCM_04999 [Cordyceps militaris CM01] &gt;gi|346324026|gb|EGX93624.1| hypothetical protein CCM_04999 [Cordyceps militaris CM01]	gi|667657128|ref|XM_008602174.1|/5e-23/Beauveria bassiana ARSEF 2860 mll5682 protein partial mRNA	NA	NA	mll5682/6e-07/---	NA	NA
CL1274.Contig3_All	CL1274.Contig3_All	193.08	107	77.49	gi|573976532|ref|XP_006666211.1|/0/hypothetical protein CCM_00990 [Cordyceps militaris CM01] &gt;gi|346326738|gb|EGX96334.1| hypothetical protein CCM_00990 [Cordyceps militaris CM01]	gi|573976533|ref|XM_006666149.1|/0.0/Cordyceps militaris CM01 Glutathione-dependent formaldehyde-activating, GFA (CCM_00991), partial mRNA	sp|P08640|MUC1_YEAST/4e-12/Flocculation protein FLO11 OS=Saccharomyces cerevisiae (strain ATCC 204508 / S288c) GN=MUC1 PE=1 SV=2	sce:YIR019C/4e-11/FLO11, MUC1, STA4; Flo11p; K19851 flocculation protein FLO11	lin0600/4e-21/---	NA	biological_process:GO:0055114//oxidation-reduction process;GO:0006629//lipid metabolic process;cellular_component:GO:0016021//integral component of membrane;GO:0005737//cytoplasm;molecular_function:GO:0016627//oxidoreductase activity, acting on the CH-CH group of donors;
Unigene7184_All	Unigene7184_All	192.89	194.47	171.33	gi|573974624|ref|XP_006665257.1|/5.22795e-110/rho-gdp dissociation inhibitor [Cordyceps militaris CM01] &gt;gi|346325784|gb|EGX95380.1| rho-gdp dissociation inhibitor [Cordyceps militaris CM01]	gi|573974623|ref|XM_006665194.1|/0.0/Cordyceps militaris CM01 rho-gdp dissociation inhibitor (CCM_00034), partial mRNA	sp|O14224|GDIR_SCHPO/1e-42/Rho GDP-dissociation inhibitor OS=Schizosaccharomyces pombe (strain 972 / ATCC 24843) GN=SPAC6F12.06 PE=1 SV=1	cmt:CCM_00034/5e-111/rho-gdp dissociation inhibitor; K12462 Rho GDP-dissociation inhibitor	SPBC28F2.12/2e-07/---	NA	biological_process:GO:0050790//regulation of catalytic activity;cellular_component:GO:0005737//cytoplasm;molecular_function:GO:0005094//Rho GDP-dissociation inhibitor activity;
Unigene7243_All	Unigene7243_All	192.84	174.21	208.96	gi|573990661|ref|XP_006673251.1|/1.32738e-140/hypothetical protein CCM_08049 [Cordyceps militaris CM01] &gt;gi|346320195|gb|EGX89796.1| hypothetical protein CCM_08049 [Cordyceps militaris CM01]	gi|667649720|ref|XM_008598470.1|/2e-12/Beauveria bassiana ARSEF 2860 ankyrin repeat-containing protein partial mRNA	NA	NA	NA	NA	NA
Unigene4485_All	Unigene4485_All	192.67	189.67	213.17	gi|573993313|ref|XP_006674577.1|/2.82813e-159/hypothetical protein CCM_09380 [Cordyceps militaris CM01] &gt;gi|346318154|gb|EGX87758.1| hypothetical protein CCM_09380 [Cordyceps militaris CM01]	gi|573993314|ref|XM_006674515.1|/0.0/Cordyceps militaris CM01 Zinc finger domain-containing protein, RING-type (CCM_09381), partial mRNA	sp|P38239|YBR2_YEAST/5e-12/Uncharacterized RING finger protein YBR062C OS=Saccharomyces cerevisiae (strain ATCC 204508 / S288c) GN=YBR062C PE=1 SV=2	pbn:PADG_07762/2e-09/pre-mRNA-splicing factor cwc22; K13100 pre-mRNA-splicing factor CWC22	DR2133/1e-07/---	PF12311/1.7E-37/Protein of unknown function (DUF3632)	molecular_function:GO:0008270//zinc ion binding;
CL1934.Contig2_All	CL1934.Contig2_All	192.64	126.84	96.29	gi|573986379|ref|XP_006671110.1|/1.60517e-32/hypothetical protein CCM_05903 [Cordyceps militaris CM01] &gt;gi|346322146|gb|EGX91745.1| hypothetical protein CCM_05903 [Cordyceps militaris CM01]	gi|573986376|ref|XM_006671046.1|/1e-115/Cordyceps militaris CM01 hypothetical protein (CCM_05902), partial mRNA	NA	NA	NA	NA	NA
Unigene6227_All	Unigene6227_All	192.14	180.29	177.43	gi|573974956|ref|XP_006665423.1|/0/alanine--glyoxylate aminotransferase [Cordyceps militaris CM01] &gt;gi|346325950|gb|EGX95546.1| alanine--glyoxylate aminotransferase [Cordyceps militaris CM01]	gi|573974955|ref|XM_006665360.1|/0.0/Cordyceps militaris CM01 alanine--glyoxylate aminotransferase (CCM_00200), partial mRNA	sp|P43567|AGX1_YEAST/4e-80/Alanine--glyoxylate aminotransferase 1 OS=Saccharomyces cerevisiae (strain ATCC 204508 / S288c) GN=AGX1 PE=1 SV=1	cmt:CCM_00200/0.0/alanine--glyoxylate aminotransferase; K00830 alanine-glyoxylate transaminase / serine-glyoxylate transaminase / serine-pyruvate transaminase [EC:2.6.1.44 2.6.1.45 2.6.1.51]	YFL030w/1e-79/---	PTHR21152:SF7/6.5E-153/--	molecular_function:GO:0008483//transaminase activity;
Unigene7531_All	Unigene7531_All	191.89	151.64	164.08	gi|573992203|ref|XP_006674022.1|/2.14995e-147/NAD dependent epimerase/dehydratase family protein [Cordyceps militaris CM01] &gt;gi|346319175|gb|EGX88777.1| NAD dependent epimerase/dehydratase family protein [Cordyceps militaris CM01]	gi|573992202|ref|XM_006673959.1|/0.0/Cordyceps militaris CM01 NAD dependent epimerase/dehydratase family protein (CCM_08823), partial mRNA	sp|Q9Y7K0|YGL3_SCHPO/1e-15/UPF0659 protein C216.03 OS=Schizosaccharomyces pombe (strain 972 / ATCC 24843) GN=SPBC216.03 PE=3 SV=1	val:VDBG_08875/2e-10/pre-mRNA-splicing factor cwc22; K13100 pre-mRNA-splicing factor CWC22	Cgl1506/2e-15/---	PTHR15020:SF28/3.4E-68/--	NA
Unigene6314_All	Unigene6314_All	191.76	198.98	207.6	gi|573980344|ref|XP_006668107.1|/1.23676e-138/cytomegalovirus gH-receptor family protein, putative [Cordyceps militaris CM01] &gt;gi|346325024|gb|EGX94621.1| cytomegalovirus gH-receptor family protein, putative [Cordyceps militaris CM01]	gi|667654674|ref|XM_008600947.1|/0.0/Beauveria bassiana ARSEF 2860 dienelactone hydrolase partial mRNA	sp|P39721|AIM2_YEAST/4e-37/Protein AIM2 OS=Saccharomyces cerevisiae (strain ATCC 204508 / S288c) GN=AIM2 PE=1 SV=1	sce:YIR019C/6e-11/FLO11, MUC1, STA4; Flo11p; K19851 flocculation protein FLO11	YAL049c/9e-37/---	PF01738/1.2E-28/Dienelactone hydrolase family	biological_process:GO:0034975//protein folding in endoplasmic reticulum;cellular_component:GO:0030176//integral component of endoplasmic reticulum membrane;GO:0005739//mitochondrion;molecular_function:GO:0016787//hydrolase activity;
CL2006.Contig3_All	CL2006.Contig3_All	191.69	109.06	55.05	gi|573981617|ref|XP_006668729.1|/0/GABA permease, putative [Cordyceps militaris CM01] &gt;gi|346325646|gb|EGX95243.1| GABA permease, putative [Cordyceps militaris CM01]	gi|667661624|ref|XM_008604422.1|/1e-116/Beauveria bassiana ARSEF 2860 choline transport protein partial mRNA	sp|P19807|HNM1_YEAST/2e-56/Choline transport protein OS=Saccharomyces cerevisiae (strain ATCC 204508 / S288c) GN=HNM1 PE=1 SV=1	lel:LELG_01218/6e-68/similar to choline transport protein; K19564 choline transport protein	YGL077c/4e-56/---	PF13520/5.4E-45/Amino acid permease	biological_process:GO:0003333//amino acid transmembrane transport;cellular_component:GO:0016021//integral component of membrane;molecular_function:GO:0015171//amino acid transmembrane transporter activity;
Unigene3184_All	Unigene3184_All	190.85	188.67	173.34	gi|573981225|ref|XP_006668533.1|/0/Heat shock protein Hsp70 [Cordyceps militaris CM01] &gt;gi|346325450|gb|EGX95047.1| Heat shock protein Hsp70 [Cordyceps militaris CM01]	gi|573981224|ref|XM_006668470.1|/0.0/Cordyceps militaris CM01 Heat shock protein Hsp70 (CCM_03319), partial mRNA	sp|O36027|WSP1_SCHPO/3e-11/Wiskott-Aldrich syndrome protein homolog 1 OS=Schizosaccharomyces pombe (strain 972 / ATCC 24843) GN=wsp1 PE=1 SV=3	yli:YALI0F22165g/3e-12/YALI0F22165p; K12609 CCR4-NOT transcriptional complex subunit CAF120	TVN0488/4e-09/---	PTHR19375/1.6E-187/--	molecular_function:GO:0005524//ATP binding;
CL258.Contig1_All	CL258.Contig1_All	190.75	99.34	30.66	gi|573992591|ref|XP_006674216.1|/1.26231e-135/hypothetical protein CCM_09018 [Cordyceps militaris CM01] &gt;gi|346319369|gb|EGX88971.1| hypothetical protein CCM_09018 [Cordyceps militaris CM01]	gi|573992590|ref|XM_006674153.1|/0.0/Cordyceps militaris CM01 hypothetical protein (CCM_09018), partial mRNA	NA	NA	NA	PF12224/3.2E-19/Putative amidoligase enzyme	NA
Unigene1306_All	Unigene1306_All	190.22	185.52	193.62	gi|729189568|emb|CEJ80911.1|/4.98689e-108/Putative Proteasome subunit beta type [Torrubiella hemipterigena]	gi|573980962|ref|XM_006668339.1|/0.0/Cordyceps militaris CM01 proteasome component C11 (CCM_03188), partial mRNA	sp|Q9P6U7|PSB4_NEUCR/1e-100/Probable proteasome subunit beta type-4 OS=Neurospora crassa (strain ATCC 24698 / 74-OR23-1A / CBS 708.71 / DSM 1257 / FGSC 987) GN=pcb-4 PE=3 SV=2	cmt:CCM_03188/2e-108/proteasome component C11; K02734 20S proteasome subunit beta 4 [EC:3.4.25.1]	YER012w/2e-59/---	PS51476/39.3/Proteasome beta-type subunit profile.	biological_process:GO:0010499//proteasomal ubiquitin-independent protein catabolic process;GO:0010950//positive regulation of endopeptidase activity;GO:0043161//proteasome-mediated ubiquitin-dependent protein catabolic process;cellular_component:GO:0005635//nuclear envelope;GO:0005829//cytosol;GO:0019774//proteasome core complex, beta-subunit complex;GO:0005789//endoplasmic reticulum membrane;mol…
Unigene6108_All	Unigene6108_All	189.82	183.96	178.29	gi|573987629|ref|XP_006671735.1|/0/hypothetical protein CCM_06531 [Cordyceps militaris CM01] &gt;gi|346320512|gb|EGX90112.1| hypothetical protein CCM_06531 [Cordyceps militaris CM01]	gi|667658458|ref|XM_008602839.1|/1e-158/Beauveria bassiana ARSEF 2860 anaphase-promoting complex subunit Apc5 partial mRNA	sp|P32911|SUI1_YEAST/8e-36/Eukaryotic translation initiation factor eIF-1 OS=Saccharomyces cerevisiae (strain ATCC 204508 / S288c) GN=SUI1 PE=1 SV=1	vda:VDAG_02451/6e-55/translation factor SUI1; K03113 translation initiation factor 1	YNL244c/2e-35/---	PF12326/6.4E-19/N-glycosylation protein	biological_process:GO:0034599//cellular response to oxidative stress;cellular_component:GO:0016021//integral component of membrane;GO:0005789//endoplasmic reticulum membrane;
Unigene992_All	Unigene992_All	189.56	193.46	215.76	gi|573975578|ref|XP_006665734.1|/0/DnaJ domain protein [Cordyceps militaris CM01] &gt;gi|346326261|gb|EGX95857.1| DnaJ domain protein [Cordyceps militaris CM01]	gi|573975577|ref|XM_006665671.1|/0.0/Cordyceps militaris CM01 DnaJ domain protein (CCM_00511), partial mRNA	sp|P07144|VDAC_NEUCR/3e-132/Mitochondrial outer membrane protein porin OS=Neurospora crassa (strain ATCC 24698 / 74-OR23-1A / CBS 708.71 / DSM 1257 / FGSC 987) GN=B7H23.070 PE=2 SV=1	cmt:CCM_00510/2e-154/outer mitochondrial membrane protein porin; K15040 voltage-dependent anion channel protein 2	YPO2725/1e-14/---	PTHR24076:SF108/1.1E-29/--	biological_process:GO:1903959//regulation of anion transmembrane transport;cellular_component:GO:0016021//integral component of membrane;GO:0005741//mitochondrial outer membrane;molecular_function:GO:0008308//voltage-gated anion channel activity;
CL258.Contig2_All	CL258.Contig2_All	189.49	106.96	29.56	gi|573992591|ref|XP_006674216.1|/1.17996e-140/hypothetical protein CCM_09018 [Cordyceps militaris CM01] &gt;gi|346319369|gb|EGX88971.1| hypothetical protein CCM_09018 [Cordyceps militaris CM01]	gi|573992590|ref|XM_006674153.1|/0.0/Cordyceps militaris CM01 hypothetical protein (CCM_09018), partial mRNA	NA	NA	NA	PF12224/3.2E-19/Putative amidoligase enzyme	NA
Unigene3403_All	Unigene3403_All	189.42	156.4	0.03	gi|573992781|ref|XP_006674311.1|/0/Di-copper centre-containing [Cordyceps militaris CM01] &gt;gi|346318375|gb|EGX87978.1| Di-copper centre-containing [Cordyceps militaris CM01]	gi|573992780|ref|XM_006674248.1|/0.0/Cordyceps militaris CM01 Di-copper centre-containing (CCM_09114), partial mRNA	sp|Q8J130|TYRO_ASPFU/9e-72/Tyrosinase OS=Neosartorya fumigata (strain ATCC MYA-4609 / Af293 / CBS 101355 / FGSC A1100) GN=tyr1 PE=3 SV=2	maj:MAA_08523/0.0/Tyrosinase; K00505 tyrosinase [EC:1.14.18.1]	NA	PTHR11474:SF18/2.2E-40/--	biological_process:GO:0055114//oxidation-reduction process;molecular_function:GO:0016627//oxidoreductase activity, acting on the CH-CH group of donors;GO:0046872//metal ion binding;
CL1286.Contig1_All	CL1286.Contig1_All	187.65	306.24	18.02	gi|573988833|ref|XP_006672337.1|/4.10008e-107/hypothetical protein CCM_07136 [Cordyceps militaris CM01] &gt;gi|346321116|gb|EGX90716.1| hypothetical protein CCM_07136 [Cordyceps militaris CM01]	gi|573988832|ref|XM_006672274.1|/0.0/Cordyceps militaris CM01 hypothetical protein (CCM_07136), partial mRNA	NA	NA	NA	NA	NA
CL1282.Contig2_All	CL1282.Contig2_All	186.17	243.86	477.23	gi|573981389|ref|XP_006668615.1|/0/homogentisate 1,2-dioxygenase, putative [Cordyceps militaris CM01] &gt;gi|346325532|gb|EGX95129.1| homogentisate 1,2-dioxygenase, putative [Cordyceps militaris CM01]	gi|667662296|ref|XM_008604758.1|/0.0/Beauveria bassiana ARSEF 2860 homogentisate 1,2-dioxygenase partial mRNA	sp|Q00667|HGD_EMENI/6e-91/Homogentisate 1,2-dioxygenase OS=Emericella nidulans (strain FGSC A4 / ATCC 38163 / CBS 112.46 / NRRL 194 / M139) GN=hmgA PE=2 SV=1	maj:MAA_00833/2e-171/homogentisate-dioxygenase; K00451 homogentisate 1,2-dioxygenase [EC:1.13.11.5]	RSp0691/3e-91/---	PTHR11056/1.4E-162/--	biological_process:GO:0006570//tyrosine metabolic process;GO:0055114//oxidation-reduction process;GO:0006559//L-phenylalanine catabolic process;molecular_function:GO:0004411//homogentisate 1,2-dioxygenase activity;
Unigene8285_All	Unigene8285_All	185.68	201.76	152.89	gi|573985225|ref|XP_006670533.1|/0/heat shock 70 kDa protein [Cordyceps militaris CM01] &gt;gi|346321569|gb|EGX91168.1| heat shock 70 kDa protein [Cordyceps militaris CM01]	gi|573985224|ref|XM_006670470.1|/0.0/Cordyceps militaris CM01 heat shock 70 kDa protein (CCM_05326), partial mRNA	sp|Q5B0C0|HSP7M_EMENI/0.0/Heat shock 70 kDa protein OS=Emericella nidulans (strain FGSC A4 / ATCC 38163 / CBS 112.46 / NRRL 194 / M139) GN=AN6010 PE=1 SV=1	cmt:CCM_05326/0.0/heat shock 70 kDa protein; K04043 molecular chaperone DnaK	SPAC664.11/0.0/---	PR00301/1.9E-76/70kDa heat shock protein signature	biological_process:GO:0006457//protein folding;molecular_function:GO:0005524//ATP binding;GO:0051082//unfolded protein binding;
Unigene7556_All	Unigene7556_All	185.32	160.16	180.67	gi|573985413|ref|XP_006670627.1|/0/thioredoxin reductase [Cordyceps militaris CM01] &gt;gi|346321663|gb|EGX91262.1| thioredoxin reductase [Cordyceps militaris CM01]	gi|573985412|ref|XM_006670564.1|/0.0/Cordyceps militaris CM01 thioredoxin reductase (CCM_05420), partial mRNA	sp|P51978|TRXB_NEUCR/6e-148/Thioredoxin reductase OS=Neurospora crassa (strain ATCC 24698 / 74-OR23-1A / CBS 708.71 / DSM 1257 / FGSC 987) GN=cys-9 PE=3 SV=1	cmt:CCM_05420/0.0/thioredoxin reductase; K00384 thioredoxin reductase (NADPH) [EC:1.8.1.9]	YDR353w/1e-115/---	PF07992/2.7E-29/Pyridine nucleotide-disulphide oxidoreductase	biological_process:GO:0019430//removal of superoxide radicals;GO:0055114//oxidation-reduction process;cellular_component:GO:0005634//nucleus;GO:0005829//cytosol;molecular_function:GO:0004791//thioredoxin-disulfide reductase activity;
Unigene5290_All	Unigene5290_All	184.83	154.91	107.48	gi|573987229|ref|XP_006671535.1|/5.1537e-91/hypothetical protein CCM_06332 [Cordyceps militaris CM01] &gt;gi|346322572|gb|EGX92171.1| hypothetical protein CCM_06332 [Cordyceps militaris CM01]	gi|573987228|ref|XM_006671472.1|/0.0/Cordyceps militaris CM01 hypothetical protein (CCM_06332), partial mRNA	NA	NA	NA	NA	NA
Unigene7833_All	Unigene7833_All	183.55	186.62	231.04	gi|573992699|ref|XP_006674270.1|/0/Chalcone isomerase, subgroup [Cordyceps militaris CM01] &gt;gi|346319423|gb|EGX89025.1| Chalcone isomerase, subgroup [Cordyceps militaris CM01]	gi|573992698|ref|XM_006674207.1|/0.0/Cordyceps militaris CM01 Chalcone isomerase, subgroup (CCM_09073), partial mRNA	sp|Q6BN19|AIM18_DEBHA/2e-25/Altered inheritance of mitochondria protein 18, mitochondrial OS=Debaryomyces hansenii (strain ATCC 36239 / CBS 767 / JCM 1990 / NBRC 0083 / IGC 2968) GN=AIM18 PE=3 SV=1	maj:MAA_04998/4e-35/Glutaredoxin active site protein; K03676 glutaredoxin 3	YDR513w/5e-21/---	PF02431/4.0E-56/Chalcone-flavanone isomerase	cellular_component:GO:0005634//nucleus;GO:0005829//cytosol;GO:0016021//integral component of membrane;molecular_function:GO:0016872//intramolecular lyase activity;
CL1629.Contig1_All	CL1629.Contig1_All	182.45	101.56	89.22	gi|573990433|ref|XP_006673137.1|/0/pantothenate transporter, putative [Cordyceps militaris CM01] &gt;gi|346320081|gb|EGX89682.1| pantothenate transporter, putative [Cordyceps militaris CM01]	gi|667658606|ref|XM_008602913.1|/9e-40/Beauveria bassiana ARSEF 2860 major facilitator superfamily transporter partial mRNA	sp|O43000|LIZ1_SCHPO/1e-60/Pantothenate transporter liz1 OS=Schizosaccharomyces pombe (strain 972 / ATCC 24843) GN=liz1 PE=2 SV=2	shs:STEHIDRAFT_108639/2e-84/MFS general substrate transporter; K03448 MFS transporter, ACS family, pantothenate transporter	YAL067c/3e-44/---	PTHR11662/9.5E-119/--	biological_process:GO:0055085//transmembrane transport;cellular_component:GO:0016021//integral component of membrane;
Unigene6885_All	Unigene6885_All	182.29	185.21	117.39	gi|573984615|ref|XP_006670228.1|/1.1727e-76/phosphotransmitter protein Ypd1, putative [Cordyceps militaris CM01] &gt;gi|346324047|gb|EGX93645.1| phosphotransmitter protein Ypd1, putative [Cordyceps militaris CM01]	gi|573984614|ref|XM_006670165.1|/0.0/Cordyceps militaris CM01 phosphotransmitter protein Ypd1, putative (CCM_05020), partial mRNA	sp|O94321|MPR1_SCHPO/3e-25/Multistep phosphorelay regulator 1 OS=Schizosaccharomyces pombe (strain 972 / ATCC 24843) GN=mpr1 PE=1 SV=1	tre:TRIREDRAFT_123344/8e-51/histidine phosphotransferase; K11232 osomolarity two-component system, phosphorelay intermediate protein YPD1	SPBC725.02/8e-25/---	NA	biological_process:GO:0032874//positive regulation of stress-activated MAPK cascade;GO:0010972//negative regulation of G2/M transition of mitotic cell cycle;GO:0034599//cellular response to oxidative stress;GO:0007234//osmosensory signaling via phosphorelay pathway;cellular_component:GO:0005634//nucleus;GO:0005829//cytosol;molecular_function:GO:0043424//protein histidine kinase binding;GO:0004871…
Unigene341_All	Unigene341_All	181.28	175.99	215.81	gi|573987227|ref|XP_006671534.1|/6.6663e-163/Protein kinase-like domain [Cordyceps militaris CM01] &gt;gi|346322571|gb|EGX92170.1| Protein kinase-like domain [Cordyceps militaris CM01]	gi|573987226|ref|XM_006671471.1|/0.0/Cordyceps militaris CM01 Protein kinase-like domain (CCM_06331), partial mRNA	NA	cmt:CCM_00467/4e-10/Protein kinase-like domain; K14960 COMPASS component SPP1	NA	PF01636/1.4E-18/Phosphotransferase enzyme family	biological_process:GO:0016310//phosphorylation;molecular_function:GO:0016301//kinase activity;
Unigene3191_All	Unigene3191_All	180.67	208.22	191.57	gi|573983031|ref|XP_006669436.1|/0/SH3 domain protein [Cordyceps militaris CM01] &gt;gi|346323255|gb|EGX92853.1| SH3 domain protein [Cordyceps militaris CM01]	gi|573983030|ref|XM_006669373.1|/0.0/Cordyceps militaris CM01 SH3 domain protein (CCM_04225), partial mRNA	sp|Q00647|MYO1_EMENI/3e-13/Myosin-1 OS=Emericella nidulans (strain FGSC A4 / ATCC 38163 / CBS 112.46 / NRRL 194 / M139) GN=myoA PE=1 SV=2	ani:AN1558.2/4e-12/similar to A56511 myosin I myoA - Emericella nidulans; K10356 myosin I	STM0960/7e-09/---	PF14604/1.5E-10/Variant SH3 domain	cellular_component:GO:0016021//integral component of membrane;
Unigene3013_All	Unigene3013_All	179.43	130.76	122.47	gi|573992687|ref|XP_006674264.1|/1.14592e-123/phosphoribosylglycinamide formyltransferase [Cordyceps militaris CM01] &gt;gi|346319417|gb|EGX89019.1| phosphoribosylglycinamide formyltransferase [Cordyceps militaris CM01]	gi|573992686|ref|XM_006674201.1|/0.0/Cordyceps militaris CM01 phosphoribosylglycinamide formyltransferase (CCM_09067), partial mRNA	sp|Q9UUK7|PUR3_SCHPO/1e-39/Phosphoribosylglycinamide formyltransferase OS=Schizosaccharomyces pombe (strain 972 / ATCC 24843) GN=ade5 PE=2 SV=1	cmt:CCM_09067/1e-124/phosphoribosylglycinamide formyltransferase; K00601 phosphoribosylglycinamide formyltransferase [EC:2.1.2.2]	SPCC24E4.01/3e-39/---	NA	biological_process:GO:0006164//purine nucleotide biosynthetic process;GO:0046084//adenine biosynthetic process;cellular_component:GO:0005634//nucleus;GO:0005737//cytoplasm;molecular_function:GO:0016742//hydroxymethyl-, formyl- and related transferase activity;
Unigene5401_All	Unigene5401_All	179.02	137	177.22	gi|573980300|ref|XP_006668089.1|/0/mitochondrial intermembrane space protein Mia40 [Cordyceps militaris CM01] &gt;gi|346325006|gb|EGX94603.1| mitochondrial intermembrane space protein Mia40 [Cordyceps militaris CM01]	gi|573980299|ref|XM_006668026.1|/0.0/Cordyceps militaris CM01 mitochondrial intermembrane space protein Mia40 (CCM_02874), partial mRNA	sp|Q4IK03|MIA40_GIBZE/5e-81/Mitochondrial intermembrane space import and assembly protein 40 OS=Gibberella zeae (strain PH-1 / ATCC MYA-4620 / FGSC 9075 / NRRL 31084) GN=MIA40 PE=3 SV=2	cmt:CCM_02874/0.0/mitochondrial intermembrane space protein Mia40; K17782 mitochondrial intermembrane space import and assembly protein 40	DR2133/7e-08/---	PTHR21622:SF0/4.3E-46/--	cellular_component:GO:0016021//integral component of membrane;GO:0005739//mitochondrion;
Unigene7796_All	Unigene7796_All	177.57	196.51	181.46	gi|701778043|gb|KGQ11666.1|/0/putative UTP--glucose-1-phosphate uridylyltransferase [Beauveria bassiana D1-5]	gi|573987036|ref|XM_006671376.1|/0.0/Cordyceps militaris CM01 UTP-glucose-1-phosphate uridylyltransferase (CCM_06235), partial mRNA	sp|P78811|UGPA1_SCHPO/0.0/Probable UTP--glucose-1-phosphate uridylyltransferase OS=Schizosaccharomyces pombe (strain 972 / ATCC 24843) GN=fuy1 PE=1 SV=2	cmt:CCM_06235/0.0/UTP-glucose-1-phosphate uridylyltransferase; K00963 UTP--glucose-1-phosphate uridylyltransferase [EC:2.7.7.9]	SPCC1322.04/0.0/---	PTHR11952/1.6E-259/--	biological_process:GO:0006011//UDP-glucose metabolic process;molecular_function:GO:0003983//UTP:glucose-1-phosphate uridylyltransferase activity;
Unigene536_All	Unigene536_All	177.56	138.06	88.57	gi|573990111|ref|XP_006672976.1|/0/hypothetical protein CCM_07773 [Cordyceps militaris CM01] &gt;gi|346319920|gb|EGX89521.1| hypothetical protein CCM_07773 [Cordyceps militaris CM01]	gi|573990110|ref|XM_006672913.1|/0.0/Cordyceps militaris CM01 hypothetical protein (CCM_07773), partial mRNA	sp|P47179|DAN4_YEAST/2e-11/Cell wall protein DAN4 OS=Saccharomyces cerevisiae (strain ATCC 204508 / S288c) GN=DAN4 PE=2 SV=1	cthr:CTHT_0066610/4e-21/centromere/microtubule binding protein cbf5-like protein; K11131 H/ACA ribonucleoprotein complex subunit 4 [EC:5.4.99.-]	NA	NA	cellular_component:GO:0016021//integral component of membrane;
Unigene8443_All	Unigene8443_All	177.53	129.64	58.87	gi|573992755|ref|XP_006674298.1|/0/hypothetical protein CCM_09101 [Cordyceps militaris CM01] &gt;gi|346318362|gb|EGX87965.1| hypothetical protein CCM_09101 [Cordyceps militaris CM01]	gi|573992754|ref|XM_006674235.1|/0.0/Cordyceps militaris CM01 hypothetical protein (CCM_09101), partial mRNA	NA	NA	NA	NA	NA
Unigene1333_All	Unigene1333_All	177.22	189.8	227.1	gi|573991937|ref|XP_006673889.1|/9.42393e-104/NADH-ubiquinone oxidoreductase [Cordyceps militaris CM01] &gt;gi|346319042|gb|EGX88644.1| NADH-ubiquinone oxidoreductase [Cordyceps militaris CM01]	gi|573991936|ref|XM_006673826.1|/0.0/Cordyceps militaris CM01 NADH-ubiquinone oxidoreductase (CCM_08689), partial mRNA	sp|Q02854|NUXM_NEUCR/8e-70/NADH-ubiquinone oxidoreductase 20.9 kDa subunit OS=Neurospora crassa (strain ATCC 24698 / 74-OR23-1A / CBS 708.71 / DSM 1257 / FGSC 987) GN=nuo20.9 PE=1 SV=1	NA	NA	PF10785/3.4E-32/NADH-ubiquinone oxidoreductase complex I, 21 kDa subunit	cellular_component:GO:0016021//integral component of membrane;
Unigene4343_All	Unigene4343_All	177	198.85	282.55	gi|573993813|ref|XP_006674827.1|/2.95117e-17/hypothetical protein CCM_09631 [Cordyceps militaris CM01] &gt;gi|346318065|gb|EGX87670.1| hypothetical protein CCM_09631 [Cordyceps militaris CM01]	gi|573993812|ref|XM_006674764.1|/2e-68/Cordyceps militaris CM01 hypothetical protein (CCM_09631), partial mRNA	NA	NA	NA	NA	cellular_component:GO:0016021//integral component of membrane;
Unigene4596_All	Unigene4596_All	176.64	203.99	210.14	gi|573976936|ref|XP_006666413.1|/0/NAD(P)-binding domain [Cordyceps militaris CM01] &gt;gi|346326940|gb|EGX96536.1| NAD(P)-binding domain [Cordyceps militaris CM01]	gi|573976935|ref|XM_006666350.1|/0.0/Cordyceps militaris CM01 NAD(P)-binding domain (CCM_01193), partial mRNA	sp|P25284|NDUA9_NEUCR/3e-163/NADH-ubiquinone oxidoreductase 40 kDa subunit, mitochondrial OS=Neurospora crassa (strain ATCC 24698 / 74-OR23-1A / CBS 708.71 / DSM 1257 / FGSC 987) GN=nuo40 PE=1 SV=2	cmt:CCM_01193/0.0/NAD(P)-binding domain; K03953 NADH dehydrogenase (ubiquinone) 1 alpha subcomplex subunit 9	CC3604/6e-31/---	PTHR12126/5.9E-153/--	NA
CL1200.Contig2_All	CL1200.Contig2_All	176.59	199.92	217.68	gi|573982525|ref|XP_006669183.1|/1.67961e-129/clathrin light chain [Cordyceps militaris CM01] &gt;gi|346323001|gb|EGX92599.1| clathrin light chain [Cordyceps militaris CM01]	gi|573982524|ref|XM_006669120.1|/0.0/Cordyceps militaris CM01 clathrin light chain (CCM_03972), partial mRNA	sp|Q9USP6|CLC1_SCHPO/8e-36/Clathrin light chain OS=Schizosaccharomyces pombe (strain 972 / ATCC 24843) GN=clc1 PE=1 SV=1	pan:PODANSg9093/2e-18/hypothetical protein; K02269 cytochrome c oxidase subunit 7	NA	PTHR10639/3.6E-49/--	biological_process:GO:0006886//intracellular protein transport;GO:0031505//fungal-type cell wall organization;GO:0045807//positive regulation of endocytosis;cellular_component:GO:0005768//endosome;GO:0030132//clathrin coat of coated pit;GO:0030130//clathrin coat of trans-Golgi network vesicle;molecular_function:GO:0005198//structural molecule activity;
Unigene4331_All	Unigene4331_All	176.32	179.15	73.25	gi|573992995|ref|XP_006674418.1|/4.11507e-77/heat-stable 19 kDa antigen precursor [Cordyceps militaris CM01] &gt;gi|346318482|gb|EGX88085.1| heat-stable 19 kDa antigen precursor [Cordyceps militaris CM01]	gi|573992994|ref|XM_006674355.1|/0.0/Cordyceps militaris CM01 heat-stable 19 kDa antigen precursor (CCM_09221), partial mRNA	sp|O74238|SNP1_PHANO/5e-36/Protein SnodProt1 OS=Phaeosphaeria nodorum (strain SN15 / ATCC MYA-4574 / FGSC 10173) GN=SNOG_13722 PE=2 SV=1	NA	NA	PF07249/5.4E-51/Cerato-platanin	NA
CL478.Contig2_All	CL478.Contig2_All	175.96	163.72	514.01	gi|667646813|ref|XP_008595238.1|/0/phosphatidylinositol-specific phospholipase C [Beauveria bassiana ARSEF 2860] &gt;gi|400601241|gb|EJP68884.1| phosphatidylinositol-specific phospholipase C [Beauveria bassiana ARSEF 2860]	gi|573984640|ref|XM_006670178.1|/0.0/Cordyceps militaris CM01 PLC-like phosphodiesterase, TIM beta/alpha-barrel domain (CCM_05033), partial mRNA	sp|P18899|DDR48_YEAST/1e-66/Stress protein DDR48 OS=Saccharomyces cerevisiae (strain ATCC 204508 / S288c) GN=DDR48 PE=1 SV=4	pcs:Pc13g12130/2e-53/Pc13g12130; K05857 phosphatidylinositol phospholipase C, delta [EC:3.1.4.11]	XF1267/6e-15/---	PF00387/3.8E-37/Phosphatidylinositol-specific phospholipase C, Y domain	biological_process:GO:0016042//lipid catabolic process;GO:0035556//intracellular signal transduction;cellular_component:GO:0005622//intracellular;molecular_function:GO:0004435//phosphatidylinositol phospholipase C activity;GO:0004871//signal transducer activity;
Unigene5188_All	Unigene5188_All	175.35	169.81	149.4	gi|573976746|ref|XP_006666318.1|/4.99654e-98/nuclear movement protein nudC [Cordyceps militaris CM01] &gt;gi|346326845|gb|EGX96441.1| nuclear movement protein nudC [Cordyceps militaris CM01]	gi|573976745|ref|XM_006666255.1|/0.0/Cordyceps militaris CM01 nuclear movement protein nudC (CCM_01097), partial mRNA	sp|P17624|NUDC_EMENI/8e-57/Nuclear movement protein nudC OS=Emericella nidulans (strain FGSC A4 / ATCC 38163 / CBS 112.46 / NRRL 194 / M139) GN=nudC PE=3 SV=1	NA	NA	NA	NA
Unigene5837_All	Unigene5837_All	174.89	129.09	153.82	gi|573987789|ref|XP_006671815.1|/4.81905e-115/CCAAT-binding protein subunit HAP3, putative [Cordyceps militaris CM01] &gt;gi|346320592|gb|EGX90192.1| CCAAT-binding protein subunit HAP3, putative [Cordyceps militaris CM01]	gi|667646548|ref|XM_008596884.1|/1e-140/Beauveria bassiana ARSEF 2860 CCAAT-binding protein subunit HAP3 partial mRNA	sp|P13434|HAP3_YEAST/2e-38/Transcriptional activator HAP3 OS=Saccharomyces cerevisiae (strain ATCC 204508 / S288c) GN=HAP3 PE=1 SV=1	wic:J056_000633/9e-08/DNA polymerase epsilon subunit 3; K02326 DNA polymerase epsilon subunit 3 [EC:2.7.7.7]	YBL021c/4e-38/---	PS00685/-/NF-YB/HAP3 subunit signature.	biological_process:GO:0006355//regulation of transcription, DNA-templated;cellular_component:GO:0005634//nucleus;molecular_function:GO:0046982//protein heterodimerization activity;GO:0043565//sequence-specific DNA binding;
CL1743.Contig2_All	CL1743.Contig2_All	174.73	191.87	240.97	gi|573977822|ref|XP_006666856.1|/0/dynamin GTPase, putative [Cordyceps militaris CM01] &gt;gi|346327383|gb|EGX96979.1| dynamin GTPase, putative [Cordyceps militaris CM01]	gi|573977823|ref|XM_006666794.1|/0.0/Cordyceps militaris CM01 thiazole biosynthetic enzyme (CCM_01639), partial mRNA	sp|P23618|THI4_FUSOX/1e-154/Thiamine thiazole synthase OS=Fusarium oxysporum GN=sti35 PE=1 SV=2	cmt:CCM_01639/0.0/thiazole biosynthetic enzyme; K03146 thiamine thiazole synthase	SPBC26H8.01/1e-118/---	SM00066/3.7E-6/GAL4-like Zn(II)2Cys6 (or C6 zinc) binuclear cluster DNA-binding domain	biological_process:GO:0006950//response to stress;GO:0052837//thiazole biosynthetic process;GO:0055114//oxidation-reduction process;GO:0009228//thiamine biosynthetic process;GO:0006357//regulation of transcription from RNA polymerase II promoter;GO:0000002//mitochondrial genome maintenance;cellular_component:GO:0005634//nucleus;GO:0005829//cytosol;molecular_function:GO:0000981//RNA polymerase II …
Unigene337_All	Unigene337_All	174.61	135.9	156.54	gi|573992731|ref|XP_006674286.1|/1.7892e-168/Lipase, class 2 [Cordyceps militaris CM01] &gt;gi|346319439|gb|EGX89041.1| Lipase, class 2 [Cordyceps militaris CM01]	gi|573992730|ref|XM_006674223.1|/0.0/Cordyceps militaris CM01 Lipase, class 2 (CCM_09089), partial mRNA	sp|P47179|DAN4_YEAST/8e-13/Cell wall protein DAN4 OS=Saccharomyces cerevisiae (strain ATCC 204508 / S288c) GN=DAN4 PE=2 SV=1	ani:AN8241.2/6e-07/similar to chitinase; K01183 chitinase [EC:3.2.1.14]	Cgl0080/5e-17/---	PF01674/1.7E-7/Lipase (class 2)	molecular_function:GO:0016788//hydrolase activity, acting on ester bonds;
Unigene7474_All	Unigene7474_All	173.6	174.52	182.13	gi|701771684|gb|KGQ06409.1|/5.0933e-128/Proteasome component PRE3 [Beauveria bassiana D1-5]	gi|573992062|ref|XM_006673889.1|/0.0/Cordyceps militaris CM01 proteasome component PRE3 precursor (CCM_08753), partial mRNA	sp|P38624|PSB1_YEAST/6e-85/Proteasome subunit beta type-1 OS=Saccharomyces cerevisiae (strain ATCC 204508 / S288c) GN=PRE3 PE=1 SV=2	fgr:FGSG_05631/2e-121/proteasome component PRE3 precursor; K02738 20S proteasome subunit beta 1 [EC:3.4.25.1]	SPAC22D3.07/7e-20/---	PS51476/46.96/Proteasome beta-type subunit profile.	NA
Unigene7854_All	Unigene7854_All	172.91	150.56	195.1	gi|573980358|ref|XP_006668113.1|/0/lysophospholipase precursor [Cordyceps militaris CM01] &gt;gi|346325030|gb|EGX94627.1| lysophospholipase precursor [Cordyceps militaris CM01]	gi|573980357|ref|XM_006668050.1|/0.0/Cordyceps militaris CM01 lysophospholipase precursor (CCM_02898), partial mRNA	sp|P0C957|PLB1_ASPFU/3e-176/Lysophospholipase 1 OS=Neosartorya fumigata (strain ATCC MYA-4609 / Af293 / CBS 101355 / FGSC A1100) GN=plb1 PE=2 SV=1	cmt:CCM_02898/0.0/lysophospholipase precursor; K13333 lysophospholipase [EC:3.1.1.5]	NA	PTHR10728:SF29/1.1E-228/--	biological_process:GO:0009395//phospholipid catabolic process;molecular_function:GO:0004622//lysophospholipase activity;
Unigene5860_All	Unigene5860_All	172.83	190.88	5.17	gi|573977608|ref|XP_006666749.1|/0/cytochrome P450 oxidoreductase OrdA-like protein [Cordyceps militaris CM01] &gt;gi|346327276|gb|EGX96872.1| cytochrome P450 oxidoreductase OrdA-like protein [Cordyceps militaris CM01]	gi|573977607|ref|XM_006666686.1|/0.0/Cordyceps militaris CM01 cytochrome P450 oxidoreductase OrdA-like protein (CCM_01530), partial mRNA	sp|B8NHY4|ORDA_ASPFN/4e-96/O-methylsterigmatocystin oxidoreductase OS=Aspergillus flavus (strain ATCC 200026 / FGSC A1120 / NRRL 3357 / JCM 12722 / SRRC 167) GN=ordA PE=2 SV=1	afv:AFLA_139200/4e-95/aflQ/ ordA/ ord-1/ oxidoreductase/ cytochrome P450 monooxigenase; K17651 aflatoxin B synthase [EC:1.14.13.175]	slr0574/5e-17/---	PTHR24279:SF50/3.3E-164/--	biological_process:GO:0055114//oxidation-reduction process;cellular_component:GO:0016020//membrane;molecular_function:GO:0016705//oxidoreductase activity, acting on paired donors, with incorporation or reduction of molecular oxygen;GO:0020037//heme binding;GO:0005506//iron ion binding;GO:0004497//monooxygenase activity;
Unigene2068_All	Unigene2068_All	171.83	171.38	160.78	gi|573983941|ref|XP_006669891.1|/3.68249e-74/clathrin-coated vesicle protein, putative [Cordyceps militaris CM01] &gt;gi|346323710|gb|EGX93308.1| clathrin-coated vesicle protein, putative [Cordyceps militaris CM01]	gi|346995772|gb|CP003009.1|/4e-10/Thielavia terrestris NRRL 8126 chromosome 1, complete sequence	sp|A4R2N5|TVP18_MAGO7/6e-54/Golgi apparatus membrane protein TVP18 OS=Magnaporthe oryzae (strain 70-15 / ATCC MYA-4617 / FGSC 8958) GN=TVP18 PE=3 SV=1	NA	NA	PF10233/7.7E-37/Uncharacterized conserved protein CG6151-P	biological_process:GO:0016192//vesicle-mediated transport;cellular_component:GO:0030173//integral component of Golgi membrane;
CL1540.Contig2_All	CL1540.Contig2_All	171.76	92.59	56.97	gi|573983609|ref|XP_006669725.1|/1.63063e-109/GATA transcription factor LreA [Cordyceps militaris CM01] &gt;gi|346323544|gb|EGX93142.1| GATA transcription factor LreA [Cordyceps militaris CM01]	gi|573983608|ref|XM_006669662.1|/0.0/Cordyceps militaris CM01 GATA transcription factor LreA (CCM_04514), partial mRNA	sp|Q01371|WC1_NEUCR/4e-21/White collar 1 protein OS=Neurospora crassa (strain ATCC 24698 / 74-OR23-1A / CBS 708.71 / DSM 1257 / FGSC 987) GN=wc-1 PE=1 SV=2	ani:AN3436.2/4e-28/similar to GATA-factor; K14858 pre-rRNA-processing protein SRD1	CC0285_1/6e-11/---	PTHR23244/4.5E-31/--	NA
Unigene5467_All	Unigene5467_All	171.01	150.32	129.69	gi|573977094|ref|XP_006666492.1|/4.38445e-134/Casein kinase substrate, phosphoprotein PP28 [Cordyceps militaris CM01] &gt;gi|346327019|gb|EGX96615.1| Casein kinase substrate, phosphoprotein PP28 [Cordyceps militaris CM01]	gi|573977093|ref|XM_006666429.1|/0.0/Cordyceps militaris CM01 Casein kinase substrate, phosphoprotein PP28 (CCM_01273), partial mRNA	sp|P08640|MUC1_YEAST/1e-08/Flocculation protein FLO11 OS=Saccharomyces cerevisiae (strain ATCC 204508 / S288c) GN=MUC1 PE=1 SV=2	afm:AFUA_3G07710/5e-13/nucleolin protein Nsr1; K11294 nucleolin	tolA/4e-07/---	PF10252/1.6E-26/Casein kinase substrate phosphoprotein PP28	biological_process:GO:0016310//phosphorylation;molecular_function:GO:0016301//kinase activity;
Unigene3898_All	Unigene3898_All	170.78	184.31	211.69	gi|573988985|ref|XP_006672413.1|/2.97532e-32/hypothetical protein CCM_07212 [Cordyceps militaris CM01] &gt;gi|346321192|gb|EGX90792.1| hypothetical protein CCM_07212 [Cordyceps militaris CM01]	gi|768311752|gb|CP010980.1|/6e-08/Verticillium dahliae VdLs.17 chromosome 1, complete sequence	NA	pcs:Pc13g06140/1e-07/Pc13g06140; K02143 F-type H+-transporting ATPase subunit k	NA	NA	cellular_component:GO:0016021//integral component of membrane;
Unigene3114_All	Unigene3114_All	170.64	236.59	239.78	gi|573978398|ref|XP_006667144.1|/0/MFS transporter, putative [Cordyceps militaris CM01] &gt;gi|346327671|gb|EGX97267.1| MFS transporter, putative [Cordyceps militaris CM01]	gi|573978397|ref|XM_006667081.1|/0.0/Cordyceps militaris CM01 MFS transporter, putative (CCM_01927), partial mRNA	sp|O42922|YBIH_SCHPO/5e-56/Uncharacterized MFS-type transporter C16A3.17c OS=Schizosaccharomyces pombe (strain 972 / ATCC 24843) GN=SPBC16A3.17c PE=3 SV=1	cmt:CCM_00881/6e-103/sulfate permease 2; K14708 solute carrier family 26 (sodium-independent sulfate anion transporter), member 11	SPAC1399.02/7e-54/---	PS50850/23.67/Major facilitator superfamily (MFS) profile.	biological_process:GO:0055085//transmembrane transport;cellular_component:GO:0016021//integral component of membrane;
Unigene702_All	Unigene702_All	170.59	182.84	225.51	gi|573983661|ref|XP_006669751.1|/4.61914e-155/hypothetical protein CCM_04540 [Cordyceps militaris CM01] &gt;gi|346323570|gb|EGX93168.1| hypothetical protein CCM_04540 [Cordyceps militaris CM01]	gi|573983662|ref|XM_006669689.1|/1e-146/Cordyceps militaris CM01 cytochrome c oxidase polypeptide VIb (CCM_04541), partial mRNA	sp|O94581|COX12_SCHPO/2e-27/Cytochrome c oxidase subunit 6B OS=Schizosaccharomyces pombe (strain 972 / ATCC 24843) GN=cox12 PE=3 SV=2	cmt:CCM_04541/7e-50/cytochrome c oxidase polypeptide VIb; K02267 cytochrome c oxidase subunit 6b	NA	PTHR12786/2.1E-49/--	NA
Unigene7614_All	Unigene7614_All	169.96	198.27	181.32	gi|573976994|ref|XP_006666442.1|/0/dihydrolipoyl dehydrogenase [Cordyceps militaris CM01] &gt;gi|346326969|gb|EGX96565.1| dihydrolipoyl dehydrogenase [Cordyceps militaris CM01]	gi|573976993|ref|XM_006666379.1|/0.0/Cordyceps militaris CM01 dihydrolipoyl dehydrogenase (CCM_01222), partial mRNA	sp|P09624|DLDH_YEAST/2e-175/Dihydrolipoyl dehydrogenase, mitochondrial OS=Saccharomyces cerevisiae (strain ATCC 204508 / S288c) GN=LPD1 PE=1 SV=1	cmt:CCM_01222/0.0/dihydrolipoyl dehydrogenase; K00382 dihydrolipoamide dehydrogenase [EC:1.8.1.4]	YFL018c/5e-175/---	PTHR22912:SF20/6.2E-238/--	biological_process:GO:0055114//oxidation-reduction process;GO:0045454//cell redox homeostasis;GO:0006574//valine catabolic process;GO:0006564//L-serine biosynthetic process;GO:0006090//pyruvate metabolic process;GO:0006546//glycine catabolic process;GO:0042743//hydrogen peroxide metabolic process;GO:0006552//leucine catabolic process;GO:0006103//2-oxoglutarate metabolic process;GO:0006550//isoleu…
Unigene2370_All	Unigene2370_All	169.3	175.85	169.89	gi|573993477|ref|XP_006674659.1|/0/DnaJ domain protein (Mas5), putative [Cordyceps militaris CM01] &gt;gi|346318236|gb|EGX87840.1| DnaJ domain protein (Mas5), putative [Cordyceps militaris CM01]	gi|667650446|ref|XM_008598833.1|/0.0/Beauveria bassiana ARSEF 2860 chaperone protein dnaJ 2 partial mRNA	sp|O94657|XDJ1_SCHPO/3e-88/DnaJ protein homolog xdj1 OS=Schizosaccharomyces pombe (strain 972 / ATCC 24843) GN=xdj1 PE=4 SV=1	maj:MAA_02497/3e-180/Heat shock protein DnaJ; K09503 DnaJ homolog subfamily A member 2	SPBC405.06/7e-88/---	PF01556/6.0E-16/DnaJ C terminal domain	biological_process:GO:0006457//protein folding;GO:0009408//response to heat;GO:0032781//positive regulation of ATPase activity;GO:0030150//protein import into mitochondrial matrix;cellular_component:GO:0005634//nucleus;GO:0005783//endoplasmic reticulum;GO:0031307//integral component of mitochondrial outer membrane;molecular_function:GO:0001671//ATPase activator activity;GO:0005524//ATP binding;GO…
Unigene2041_All	Unigene2041_All	168.7	167.25	17.8	gi|573979672|ref|XP_006667781.1|/2.15571e-169/hypothetical protein CCM_02566 [Cordyceps militaris CM01] &gt;gi|346324698|gb|EGX94295.1| hypothetical protein CCM_02566 [Cordyceps militaris CM01]	gi|573979671|ref|XM_006667718.1|/0.0/Cordyceps militaris CM01 hypothetical protein (CCM_02566), partial mRNA	NA	NA	NA	PF11807/9.0E-41/Domain of unknown function (DUF3328)	cellular_component:GO:0016021//integral component of membrane;
Unigene465_All	Unigene465_All	168.23	68.57	138.01	gi|573977512|ref|XP_006666701.1|/3.70984e-106/hypothetical protein CCM_01482 [Cordyceps militaris CM01] &gt;gi|346327228|gb|EGX96824.1| hypothetical protein CCM_01482 [Cordyceps militaris CM01]	gi|573977511|ref|XM_006666638.1|/0.0/Cordyceps militaris CM01 hypothetical protein (CCM_01482), partial mRNA	sp|Q8TFG9|YL61_SCHPO/3e-06/Putative GPI-anchored protein PB15E9.01c OS=Schizosaccharomyces pombe (strain 972 / ATCC 24843) GN=SPAPB15E9.01c PE=2 SV=3	NA	NA	NA	NA
[truncated: 15,978 more rows]
