# Supplementary material for: Enhancing Genome-Scale Model by Integrative Exometabolome and Transcriptome: Unveiling Carbon Assimilation towards Sphingolipid Biosynthetic Capability of Cordyceps militaris
Source: J Fungi (Basel). 2022 Aug 22;8(8):887. doi: 10.3390/jof8080887 (PMC9409897; doi:10.3390/jof8080887)
Supplement: Supplementary file 1 [file jof-08-00887-s001.zip › Supplementary File S7.xlsx]

## Sheet: Index
Supplementary Information
Enhancing Genome-Scale Model by Integrative Exometabolome and Transcriptome: Unveiling Carbon Assimilation towards Sphingolipid Biosynthetic Capability of Cordyceps militaris
Pattsarun Cheawchanlertfa 1,†, Suwalak Chitcharoen 1,2,†, Nachon Raethong 3, Qing Liu 4, Pramote Chumnanpuen 1,5, Panyawarin Soommat 1,6, Yuanda Song 1,4, Mattheos Koffas 7, Kobkul Laoteng 8,*, Wanwipa Vongsangnak 1,5,*
1 Department of Zoology, Faculty of Science, Kasetsart University, Bangkok 10900, Thailand 2 Program in Bioinformatics and Computational Biology, Graduate School, Chulalongkorn University, Bangkok 10330, Thailand 3 Institute of Nutrition, Mahidol University, Nakhon Pathom 73170, Thailand 4 Colin Ratledge Center for Microbial Lipids, School of Agriculture Engineering and Food Sciences, Shandong Un…
Supplementary File S7: List of DEGs and DAMs involved in the glycerolipid and sphingolipid biosynthetic pathways in the xylose versus glucose cultures, and the sucrose versus glucose cultures
This file includes Supplementary Table S1 to S4
	Supplementary Table S1. DEGs involved in glycerolipid biosynthetic pathway in xylose versus glucose and sucrose versus glucose
	Supplementary Table S2. DAMs involved in glycerolipid biosynthetic pathway in xylose versus glucose and sucrose versus glucose
	Supplementary Table S3. DEGs involved in sphingolipid biosynthetic pathway in xylose versus glucose and sucrose versus glucose
	Supplementary Table S4. DAMs involved in sphingolipid biosynthetic pathway in xylose versus glucose and sucrose versus glucose

## Sheet: Table S1
Supplementary Table S1. DEGs involved in glycerolipid metabolism in xylose versus glucose and sucrose versus glucose
Gene ID	Symbol	Enzyme	EC number	Xylose_expression	Sucrose_expression	Glucose_expression	Log2 (FC)_Xylose/Glucose	Log2 (FC)_Sucrose/Glucose
CL694.Contig5	GK	glycerol kinase	2.7.1.30	21.91	14.74	12.91	0.76	0.19
Unigene8373	GPAT	glycerol-3-phosphate acyltransferase	2.3.1.15	45.64	44.03	40.28	0.18	0.13
Unigene8433	MBOAT	1-acylglycerol-3-phosphate O-acyltransferase	2.3.1.51	162.67	152.65	151.49	0.1	0.01
Unigene1362	MBOAT	1-acylglycerol-3-phosphate O-acyltransferase	2.3.1.51	34.05	34.37	32.29	0.08	0.09
Unigene6929	PLPP	phosphatidate phosphate	3.1.3.4	170.67	134.83	129.85	0.39	0.05
Unigene7604	PDAT	Phospholipid:diacylglycerol acyltransferase	2.3.1.158	67.03	52.89	50.46	0.41	0.07
Unigene6230	CDP-DG	CDP-diacylglycerol synthase	2.7.7.41	6.1	5.83	7.33	-0.27	-0.33
Unigene5376	CHO1	CDP-diacylglycerol---serine O-phosphatidyltransferase	2.7.8.8	45.41	46.21	45.07	0.01	0.04

## Sheet: Table S2
Supplementary Table S2. DAMs involved in glycerolipid metabolism in xylose versus glucose and sucrose versus glucose
Putative metabolites	Enzyme	Log2 (FC)_Xylose/Glucose	Log2 (FC)_Sucrose/Glucose
TG(12:0/12:0/17:2(9Z,12Z))[iso3] (Triacylglycerol)	Phospholipid:diacylglycerol acyltransferase	4.34912	2.93267
PA(17:0/14:1(9Z)) (Phosphatidic acid)	1-acylglycerol-3-phosphate O-acyltransferase	-1.23161	Not detected

## Sheet: Table S3
Supplementary Table S3. DEGs involved in sphingolipid biosynthetic pathway in xylose versus glucose and sucrose versus glucose
Gene ID	Symbol	Enzyme	EC number	Xylose_expression	Sucrose_expression	Glucose_expression	Log2 (FC)_Xylose/Glucose	Log2 (FC)_Sucrose/Glucose
CL1591.contig1	SPT	serine palmitoyltransferase	2.3.1.50	94.7	65.54	57.66	0.72	0.18
CL1591.contig2	SPT	serine palmitoyltransferase	2.3.1.50	10.38	4.93	2.23	2.22	1.14
unigene1479	SPT	serine palmitoyltransferase	2.3.1.50	52.64	46.02	37.62	0.48	0.29
unigene1223	KDSR	3-dehydrosphinganine reductase	1.1.1.102	21.3	16.55	13.59	0.65	0.29
unigene564	SUR2	sphinganine C4-monooxygenase	1.14.18.5	53.97	41.06	44.78	0.27	-0.13
CL753.contig3	LAG1	Acyl-CoA dependent ceramidase synthase	2.3.1.24	1.87	2.56	2.25	-0.27	0.19
unigene6536	LAG1	Acyl-CoA dependent ceramidase synthase	2.3.1.24	22.69	26.2	23	-0.02	0.19
unigene1995	ASAH2	neutral ceramidase	3.5.1.23	41.18	35.73	40.47	0.03	-0.18
CL1660.contig1	ASAH2	neutral ceramidase	3.5.1.23	24.33	19.13	20.03	0.28	-0.07
CL1583.contig2	LCB3	sphingosine-1-phosphate phosphatase1	3.1.3.-	20.35	21.62	25.59	0.33	0.09
CL1583.contig1	LCB3	sphingosine-1-phosphate phosphatase1	3.1.3.-	5.21	6.66	5.99	0.2	0.35
unigene9056	SMPD1	sphingomyelin phosphodiesterase	3.1.4.12	2.1	1.74	0.7	1.58	1.31
unigene9552	SMPD1	sphingomyelin phosphodiesterase	3.1.4.12	1.72	0.57	0.58	1.57	-0.03
CL112.contig2	UGCG	ceramide glucosyltransferase	2.4.1.80	6.03	3.5	2.93	1.04	0.26
CL112.contig1	UGCG	ceramide glucosyltransferase	2.4.1.80	23.14	17.44	17.26	0.42	0.01

## Sheet: Table S4
Supplementary Table S4. DAMs involved in sphingolipid biosynthetic pathway in xylose versus glucose and sucrose versus glucose
Putative metabolites	Enzyme	Log2 (FC)_Xylose/Glucose	Log2 (FC)_Sucrose/Glucose
3-ketodihydrosphingosine	serine palmitoyltransferase	Not detected	Not detected
3-ketodihydrosphingosine	serine palmitoyltransferase	Not detected	Not detected
3-ketodihydrosphingosine	serine palmitoyltransferase	Not detected	Not detected
sphinganine	3-dehydrosphinganine reductase	10.16	12.5
phytosphingosine	sphinganine C4-monooxygenase	12.72	12.3
ceramide	sphinganine C4-monooxygenase	1.11	Not detected
phytoceramide/dihydroceramide	Acyl-CoA dependent ceramidase synthase	Not detected	Not detected
phytosphingosine	neutral ceramidase	12.72	12.3
sphingosine	neutral ceramidase	11.04	8.17
sphinganine	sphingosine-1-phosphate phosphatase2	10.16	12.5
sphingosine	sphingosine-1-phosphate phosphatase3	11.04	8.17
ceramide	sphingomyelin phosphodiesterase	1.11	Not detected
glucosylceramide	ceramide glucosyltransferase	Not detected	Not detected
